# Supplementary material for: Global seroprevalence of SARS-CoV-2 antibodies: a systematic review and meta-analysis
Source: bioRxiv or medRxiv preprint supplement (doi:10.1101/2020.11.17.20233460), 2021-06-14
Supplement: Supplementary file [file media-1.pdf]

## Supplementary Material

### Table of Contents

|                                                                                                                                          |            |
|------------------------------------------------------------------------------------------------------------------------------------------|------------|
| <b>Supplementary files.....</b>                                                                                                          | <b>2</b>   |
| S1 File. PRISMA checklist .....                                                                                                          | 2          |
| S2 File. Search strategy .....                                                                                                           | 4          |
| S3 File. Tool for assessing study risk of bias .....                                                                                     | 8          |
| S4 File. Additional data analysis details.....                                                                                           | 11         |
| S5 File. Methods for selecting and gathering data on cumulative incidence and population size .....                                      | 14         |
| <b>References for supplementary files .....</b>                                                                                          | <b>15</b>  |
| <b>Supplementary tables.....</b>                                                                                                         | <b>16</b>  |
| S1 Table. Characteristics and primary results of studies reporting population-wide seroprevalence estimates .....                        | 16         |
| S2 Table. Characteristics and primary results of studies reporting population-specific seroprevalence estimates.....                     | 156        |
| S3 Table. Risk of bias results for each included study .....                                                                             | 222        |
| S4 Table. Summary of unadjusted meta-analysis results.....                                                                               | 274        |
| S5 Table. Summary of serological tests used in included seroprevalence studies .....                                                     | 275        |
| S6 Table. Summary of meta-regression results.....                                                                                        | 277        |
| <b>Supplementary figures.....</b>                                                                                                        | <b>278</b> |
| S1 Figure. Map of serosurvey distribution by global burden of disease region .....                                                       | 278        |
| S2 Figure. Seroprevalence to cumulative case incidence ratios using cumulative incidence nine days prior to the serosurvey end date..... | 279        |
| <b>References for all included studies.....</b>                                                                                          | <b>280</b> |

## Supplementary files

### S1 File. PRISMA checklist

| Section/topic                      | #  | Checklist item                                                                                                                                                                                                                                                                                              | Reported on page #                                      |
|------------------------------------|----|-------------------------------------------------------------------------------------------------------------------------------------------------------------------------------------------------------------------------------------------------------------------------------------------------------------|---------------------------------------------------------|
| <b>TITLE</b>                       |    |                                                                                                                                                                                                                                                                                                             |                                                         |
| Title                              | 1  | Identify the report as a systematic review, meta-analysis, or both.                                                                                                                                                                                                                                         | 1                                                       |
| <b>ABSTRACT</b>                    |    |                                                                                                                                                                                                                                                                                                             |                                                         |
| Structured summary                 | 2  | Provide a structured summary including, as applicable: background; objectives; data sources; study eligibility criteria, participants, and interventions; study appraisal and synthesis methods; results; limitations; conclusions and implications of key findings; systematic review registration number. | 2-3                                                     |
| <b>INTRODUCTION</b>                |    |                                                                                                                                                                                                                                                                                                             |                                                         |
| Rationale                          | 3  | Describe the rationale for the review in the context of what is already known.                                                                                                                                                                                                                              | 5-6                                                     |
| Objectives                         | 4  | Provide an explicit statement of questions being addressed with reference to participants, interventions, comparisons, outcomes, and study design (PICOS).                                                                                                                                                  | 6                                                       |
| <b>METHODS</b>                     |    |                                                                                                                                                                                                                                                                                                             |                                                         |
| Protocol and registration          | 5  | Indicate if a review protocol exists, if and where it can be accessed (e.g., Web address), and, if available, provide registration information including registration number.                                                                                                                               | 6                                                       |
| Eligibility criteria               | 6  | Specify study characteristics (e.g., PICOS, length of follow-up) and report characteristics (e.g., years considered, language, publication status) used as criteria for eligibility, giving rationale.                                                                                                      | 7-8                                                     |
| Information sources                | 7  | Describe all information sources (e.g., databases with dates of coverage, contact with study authors to identify additional studies) in the search and date last searched.                                                                                                                                  | 6-7, S2 file, S4 file                                   |
| Search                             | 8  | Present full electronic search strategy for at least one database, including any limits used, such that it could be repeated.                                                                                                                                                                               | S2 Appendix file                                        |
| Study selection                    | 9  | State the process for selecting studies (i.e., screening, eligibility, included in systematic review, and, if applicable, included in the meta-analysis).                                                                                                                                                   | 7-8                                                     |
| Data collection process            | 10 | Describe method of data extraction from reports (e.g., piloted forms, independently, in duplicate) and any processes for obtaining and confirming data from investigators.                                                                                                                                  | 8-9, S4 file                                            |
| Data items                         | 11 | List and define all variables for which data were sought (e.g., PICOS, funding sources) and any assumptions and simplifications made.                                                                                                                                                                       | 9-11, S4 file                                           |
| Risk of bias in individual studies | 12 | Describe methods used for assessing risk of bias of individual studies (including specification of whether this was done at the study or outcome level), and how this information is to be used in any data synthesis.                                                                                      | 8, S3 file                                              |
| Summary measures                   | 13 | State the principal summary measures (e.g., risk ratio, difference in means).                                                                                                                                                                                                                               | 10-11                                                   |
| Synthesis of results               | 14 | Describe the methods of handling data and combining results of studies, if done, including measures of consistency (e.g., $I^2$ ) for each meta-analysis.                                                                                                                                                   | 9-11, S4 file                                           |
| Risk of bias across studies        | 15 | Specify any assessment of risk of bias that may affect the cumulative evidence (e.g., publication bias, selective reporting within studies).                                                                                                                                                                | 8, S3 file                                              |
| Additional analyses                | 16 | Describe methods of additional analyses (e.g., sensitivity or subgroup analyses, meta-regression), if done, indicating which were pre-specified.                                                                                                                                                            | 11, S4 file                                             |
| <b>RESULTS</b>                     |    |                                                                                                                                                                                                                                                                                                             |                                                         |
| Study selection                    | 17 | Give numbers of studies screened, assessed for eligibility, and included in the review, with reasons for exclusions at each stage, ideally with a flow diagram.                                                                                                                                             | 12, Fig 1                                               |
| Study characteristics              | 18 | For each study, present characteristics for which data were extracted (e.g., study size, PICOS, follow-up period) and provide the citations.                                                                                                                                                                | 12, Table 1, Fig 2, Fig 3, S1 table, S2 table, S3 table |
| Risk of bias within studies        | 19 | Present data on risk of bias of each study and, if available, any outcome level assessment (see item 12).                                                                                                                                                                                                   | 12, Fig 3, S4 table                                     |
| Results of individual studies      | 20 | For all outcomes considered (benefits or harms), present, for each study: (a) simple summary data for each intervention group (b) effect estimates and confidence intervals, ideally with a forest plot.                                                                                                    | S1 table, S2 table                                      |

|                             |    |                                                                                                                                                                                      |                                     |
|-----------------------------|----|--------------------------------------------------------------------------------------------------------------------------------------------------------------------------------------|-------------------------------------|
| Synthesis of results        | 21 | Present results of each meta-analysis done, including confidence intervals and measures of consistency.                                                                              | 20, 21, Table 5, S4 table, S6 table |
| Risk of bias across studies | 22 | Present results of any assessment of risk of bias across studies (see Item 15).                                                                                                      | Fig 3                               |
| Additional analysis         | 23 | Give results of additional analyses, if done (e.g., sensitivity or subgroup analyses, meta-regression [see Item 16]).                                                                | 21, 22 Table 6                      |
| <b>DISCUSSION</b>           |    |                                                                                                                                                                                      |                                     |
| Summary of evidence         | 24 | Summarize the main findings including the strength of evidence for each main outcome; consider their relevance to key groups (e.g., healthcare providers, users, and policy makers). | 23                                  |
| Limitations                 | 25 | Discuss limitations at study and outcome level (e.g., risk of bias), and at review-level (e.g., incomplete retrieval of identified research, reporting bias).                        | 27, 28                              |
| Conclusions                 | 26 | Provide a general interpretation of the results in the context of other evidence, and implications for future research.                                                              | 29, 30                              |
| <b>FUNDING</b>              |    |                                                                                                                                                                                      |                                     |
| Funding                     | 27 | Describe sources of funding for the systematic review and other support (e.g., supply of data); role of funders for the systematic review.                                           | 11                                  |

## S2 File. Search strategy

Database: Ovid MEDLINE(R) and Epub Ahead of Print, In-Process & Other Non-Indexed Citations and Daily

Dates: January 1, 2020 to December 31, 2020

Notes: Covid-19 search terms were adapted from Ovid Expert Searches

| #  | Search terms                                                                                                                                                                                                                                                                                                                                                                                                                                                                                       |
|----|----------------------------------------------------------------------------------------------------------------------------------------------------------------------------------------------------------------------------------------------------------------------------------------------------------------------------------------------------------------------------------------------------------------------------------------------------------------------------------------------------|
| 1  | exp Coronavirus/                                                                                                                                                                                                                                                                                                                                                                                                                                                                                   |
| 2  | exp Coronavirus Infections/                                                                                                                                                                                                                                                                                                                                                                                                                                                                        |
| 3  | (coronavirus* or corona virus* or OC43 or NL63 or 229E or HKU1 or HCoV* or ncov* or covid* or sars-cov* or sarscov* or Sars-coronavirus* or Severe Acute Respiratory Syndrome Coronavirus*).tw,kf.[EB2]                                                                                                                                                                                                                                                                                            |
| 4  | or/1-3                                                                                                                                                                                                                                                                                                                                                                                                                                                                                             |
| 5  | 4 not ((MERS or MERS-CoV or Middle East respiratory syndrome or camel* or dromedar* or equine or coronary or coronal or cvidence* or covidien or influenza virus or HIV or bovine or calves or TGEV or feline or porcine or BCoV or PED or PEDV or PDCoV or FIPV or FCoV or SADS-CoV or canine or CCov or zoonotic or avian influenza or H1N1 or H5N1 or H5N6 or IBV).mp. or (animals/ not humans/))                                                                                               |
| 6  | ((pneumonia or covid* or coronavirus* or corona virus* or ncov* or 2019-ncov or sars* or virus).tw,kf. or exp pneumonia/) and Wuhan.tw,kf.                                                                                                                                                                                                                                                                                                                                                         |
| 7  | (2019-ncov* or 2019nCov* or ncov19 or ncov-19 or 2019-novel CoV or sars-cov2* or sars-cov-2* or sarscov2* or sarscov-2* or Sars-coronavirus2 or Sars-coronavirus-2 or SARS-like coronavirus* or coronavirus 2 or coronavirus2* or corona or coronavirus-19 or covid19 or covid-19 or covid 2019 or ((novel or new or nouveau) adj2 (CoV or nCoV or covid or coronavirus* or corona virus or Pandemi*2)) or ((covid or covid19* or covid-19) and pandemic*2) or (coronavirus* and pneumonia).tw,kf. |
| 8  | COVID-19.rx,px,ox. or severe acute respiratory syndrome coronavirus 2.os.                                                                                                                                                                                                                                                                                                                                                                                                                          |
| 9  | or/6-8                                                                                                                                                                                                                                                                                                                                                                                                                                                                                             |
| 10 | 5 or 9                                                                                                                                                                                                                                                                                                                                                                                                                                                                                             |
| 11 | immunoglobulins/ or antibodies/ or antibodies, blocking/ or exp antibodies, neutralizing/ or antibodies, viral/ or antigen-antibody complex/ or immune sera/ or exp immunoglobulin isotypes/ or immunoglobulin a/ or immunoglobulin d/ or immunoglobulin e/ or immunoglobulin g/ or immunoglobulin m/                                                                                                                                                                                              |
| 12 | serologic tests/ or complement fixation tests/ or hemagglutination inhibition tests/ or neutralization tests/                                                                                                                                                                                                                                                                                                                                                                                      |
| 13 | immunoassay/ or fluoroimmunoassay/ or exp immunoblotting/ or immunoenzyme techniques/ or exp enzyme-linked immunosorbent assay/ or exp enzyme-linked immunospot assay/ or immunosorbent techniques/ or serologic tests/ or complement fixation tests/ or hemagglutination inhibition tests/ or neutralization tests/ or Serology/di                                                                                                                                                                |
| 14 | (enzyme linked immunosorbent or enzyme-linked immunosorbent or ELISA or immunofluorescence or complement fixation or hemagglutination inhibition or immunoblot or western blot or neutrali*).tw,kf.                                                                                                                                                                                                                                                                                                |
| 15 | (antibod* or immunoglobulin* or immune globulin* or titer* or isotype* or IgG or IgM or IgA or neutrali* or sera or serum or serolog* or saliva).tw,kf.                                                                                                                                                                                                                                                                                                                                            |
| 16 | or/11-14                                                                                                                                                                                                                                                                                                                                                                                                                                                                                           |
| 17 | seroepidemiologic studies/                                                                                                                                                                                                                                                                                                                                                                                                                                                                         |
| 18 | incidence/ or prevalence/                                                                                                                                                                                                                                                                                                                                                                                                                                                                          |
| 19 | (seroconver* or seroprevalence or sero-prevalence or seroincidence or sero-incidence or seroepidemiolog* or sero-epidemiolog*).mp.                                                                                                                                                                                                                                                                                                                                                                 |
| 20 | (inciden* or prevalen* or count* or rate*).mp.                                                                                                                                                                                                                                                                                                                                                                                                                                                     |
| 21 | (serosurvey or sero-survey or screen* or diagnostic).mp.                                                                                                                                                                                                                                                                                                                                                                                                                                           |
| 22 | (seroconver* or seroprevalence or sero-prevalence or seroincidence or sero-incidence or seroepidemiolog* or sero-epidemiolog* or inciden* or prevalen* or silent or asymptomatic or serosurvey or sero-survey).tw,kf.                                                                                                                                                                                                                                                                              |
| 23 | or/17-21                                                                                                                                                                                                                                                                                                                                                                                                                                                                                           |
| 24 | 10 and (16 and 23)                                                                                                                                                                                                                                                                                                                                                                                                                                                                                 |
| 25 | 10 and 15                                                                                                                                                                                                                                                                                                                                                                                                                                                                                          |
| 26 | 10 and 22                                                                                                                                                                                                                                                                                                                                                                                                                                                                                          |
| 27 | or/24-26                                                                                                                                                                                                                                                                                                                                                                                                                                                                                           |
| 28 | limit 27 to yr="2020-Current"                                                                                                                                                                                                                                                                                                                                                                                                                                                                      |
| 29 | remove duplicates from 28                                                                                                                                                                                                                                                                                                                                                                                                                                                                          |

Database: Embase

Dates: January 1, 2020 to December 31, 2020

Notes: Covid-19 search terms were adapted from Ovid Expert Searches

| #  | Searches                                                                                                                                                                                                                                                                                                                                                                                                                             |
|----|--------------------------------------------------------------------------------------------------------------------------------------------------------------------------------------------------------------------------------------------------------------------------------------------------------------------------------------------------------------------------------------------------------------------------------------|
| 1  | exp Coronavirus/                                                                                                                                                                                                                                                                                                                                                                                                                     |
| 2  | exp Coronavirus Infections/                                                                                                                                                                                                                                                                                                                                                                                                          |
| 3  | (coronavirus* or corona virus* or OC43 or NL63 or 229E or HKU1 or HCoV* or ncov* or covid* or sars-cov* or sarscov* or Sars-coronavirus* or Severe Acute Respiratory Syndrome Coronavirus*).tw,kw.                                                                                                                                                                                                                                   |
| 4  | or/1-3                                                                                                                                                                                                                                                                                                                                                                                                                               |
| 5  | 4 not ((MERS or MERS-CoV or Middle East respiratory syndrome or camel* or dromedar* or equine or coronary or coronal or coidence* or covdien or influenza virus or HIV or bovine or calves or TGEV or feline or porcine or BCoV or PED or PEDV or PDCoV or FIPV or FCoV or SADS-CoV or canine or CCov or zoonotic or avian influenza or H1N1 or H5N1 or H5N6 or IBV).mp. or (animals/ not humans/))                                  |
| 6  | ((pneumonia or covid* or coronavirus* or corona virus* or ncov* or 2019-ncov or sars*).tw,kw. or exp pneumonia/) and Wuhan.tw,kw.                                                                                                                                                                                                                                                                                                    |
| 7  | (2019-ncov or ncov19 or ncov-19 or 2019-novel CoV or sars-cov2 or sars-cov-2 or sarscov2 or sarscov-2 or Sars-coronavirus2 or Sars-coronavirus-2 or SARS-like coronavirus* or coronavirus-19 or covid19 or covid-19 or covid 2019 or ((novel or new or nouveau) adj2 (CoV or nCoV or covid or coronavirus* or corona virus or Pandemi*2)) or ((covid or covid19 or covid-19) and pandemic*2) or (coronavirus* and pneumonia)).tw,kw. |
| 8  | (coronavirus disease 2019 or severe acute respiratory syndrome coronavirus 2).sh,dj.                                                                                                                                                                                                                                                                                                                                                 |
| 9  | 6 or 7 or 8                                                                                                                                                                                                                                                                                                                                                                                                                          |
| 10 | 5 or 9                                                                                                                                                                                                                                                                                                                                                                                                                               |
| 11 | virus antibody/ec [Endogenous Compound]                                                                                                                                                                                                                                                                                                                                                                                              |
| 12 | neutralizing antibody/ec [Endogenous Compound]                                                                                                                                                                                                                                                                                                                                                                                       |
| 13 | exp immunoglobulin/ or exp immunoglobulin A antibody/ or exp immunoglobulin class/ or exp immunoglobulin M antibody/ or exp immunoglobulin G antibody/ or exp immunoglobulin antibody/                                                                                                                                                                                                                                               |
| 14 | 11 or 12 or 13                                                                                                                                                                                                                                                                                                                                                                                                                       |
| 15 | serology/                                                                                                                                                                                                                                                                                                                                                                                                                            |
| 16 | serodiagnosis/ or complement fixation test/ or hemagglutination inhibition test/ or hemolytic plaque assay/                                                                                                                                                                                                                                                                                                                          |
| 17 | fluorescent antibody technique/                                                                                                                                                                                                                                                                                                                                                                                                      |
| 18 | immunofluorescence test/ or viral disease immunofluorescence assay/                                                                                                                                                                                                                                                                                                                                                                  |
| 19 | enzyme linked immunosorbent assay/                                                                                                                                                                                                                                                                                                                                                                                                   |
| 20 | western blotting/                                                                                                                                                                                                                                                                                                                                                                                                                    |
| 21 | (enzyme linked immunosorbent or enzyme-linked immunosorbent or ELISA or immunoassay or immunofluorescence or fluorescent antibody or complement fixation or hemagglutination inhibition or hemolytic plaque assay or immunoblot or western blot or neutrali*).tw,kw.                                                                                                                                                                 |
| 22 | (antibod* or immunoglobulin* or immune globulin* or titer* or isotype* or IgG or IgM or IgA or neutrali* or sera or serolog* or serum or saliva).tw,kw.                                                                                                                                                                                                                                                                              |
| 23 | 15 or 16 or 17 or 18 or 19 or 20 or 21                                                                                                                                                                                                                                                                                                                                                                                               |
| 24 | 14 or 23                                                                                                                                                                                                                                                                                                                                                                                                                             |
| 25 | exp seroepidemiology/                                                                                                                                                                                                                                                                                                                                                                                                                |
| 26 | *prevalence/                                                                                                                                                                                                                                                                                                                                                                                                                         |
| 27 | *incidence/                                                                                                                                                                                                                                                                                                                                                                                                                          |
| 28 | (seroconver* or seroprevalence or sero-prevalence or sero-incidence or seroepidemiolog* or sero-epidemiolog* or inciden* or prevalen* or count* or rate* or serosurvey or sero-survey or screen* or diagnostic).mp.                                                                                                                                                                                                                  |
| 29 | (seroconver* or seroprevalence or sero-prevalence or sero-incidence or seroepidemiolog* or sero-epidemiolog* or inciden* or prevalen* or silent or asymptomatic or serosurvey or sero-survey).tw,kw.                                                                                                                                                                                                                                 |
| 30 | 25 or 26 or 27 or 28                                                                                                                                                                                                                                                                                                                                                                                                                 |
| 31 | 10 and (24 and 30)                                                                                                                                                                                                                                                                                                                                                                                                                   |
| 32 | 10 and 22                                                                                                                                                                                                                                                                                                                                                                                                                            |
| 33 | 10 and 29                                                                                                                                                                                                                                                                                                                                                                                                                            |
| 34 | 31 or 32 or 33                                                                                                                                                                                                                                                                                                                                                                                                                       |
| 35 | limit 34 to yr="2020-Current"                                                                                                                                                                                                                                                                                                                                                                                                        |
| 36 | remove duplicates from 35                                                                                                                                                                                                                                                                                                                                                                                                            |

Database: Web of Science Core Collection  
 Date: January 1, 2020 to December 31, 2020

| #  | Searches                                                                                                                                                                                                                                                                                                                                                                       |
|----|--------------------------------------------------------------------------------------------------------------------------------------------------------------------------------------------------------------------------------------------------------------------------------------------------------------------------------------------------------------------------------|
| 1  | TS=(coronavirus* or corona virus* or OC43 or NL63 or 229E or HKU1 or HCoV* or ncov* or covid* or sars-cov* or sarscov* or Sars-coronavirus* or Severe Acute Respiratory Syndrome Coronavirus*)                                                                                                                                                                                 |
| 2  | TS=(MERS or MERS-CoV or Middle East respiratory syndrome or camel* or dromedar* or equine or coronary or coronal or covidence* or covidien or influenza virus or HIV or bovine or calves or TGEV or feline or porcine or BCoV or PED or PEDV or PDCoV or FIPV or FCoV or SADS-CoV or canine or CCov or zoonotic or avian influenza or H1N1 or H5N1 or H5N6 or IBV)             |
| 3  | #1 NOT #2                                                                                                                                                                                                                                                                                                                                                                      |
| 4  | TS=((pneumonia or covid* or coronavirus* or corona virus* or ncov* or 2019-ncov or sars* or virus) AND Wuhan)                                                                                                                                                                                                                                                                  |
| 5  | TS=(2019-ncov* or 2019nCov* or ncov19 or ncov-19 or 2019-novel CoV or sars-cov2* or sars-cov-2* or sarscov2* or sarscov-2* or Sars-coronavirus2 or Sars-coronavirus-2 or SARS-like coronavirus* or corona or coronavirus-19 or covid19 or covid-19 or covid 2019 or ((novel or new or nouveau) adj2 (CoV or nCoV or covid or coronavirus*)) or (coronavirus* and pneumonia) ). |
| 6  | TS=(COVID-19 or "severe acute respiratory syndrome coronavirus")                                                                                                                                                                                                                                                                                                               |
| 7  | #6 OR #5 OR #4 OR #3                                                                                                                                                                                                                                                                                                                                                           |
| 8  | TS=(antibod* or immunoglobulin* or immune globulin* or titer* or isotype* or IgG or IgM or IgA or neutralization or sera or serolog* or saliva or serum).                                                                                                                                                                                                                      |
| 9  | TS=("enzyme linked immunosorbent assay" or "enzyme-linked immunosorbent assay" or "immunoenzyme" or ELISA or "lateral flow immunoassay" or LFIA or "immunofluorescence assay" or immunochromatography or "complement fixation test" or "hemagglutination inhibition" or immunoblot or "western blot" or "neutralization assay")                                                |
| 10 | #9 OR #8                                                                                                                                                                                                                                                                                                                                                                       |
| 11 | TI=(seroconversion or seroprevalence or seroincidence or seroepidemiolog* or incidence or prevalence or asymptomatic or sero-survey*) or AK=(seroconversion or seroprevalence or seroincidence or seroepidemiolog* or incidence or prevalence or asymptomatic or sero-survey*)                                                                                                 |
| 12 | ALL=(prevalence or incidence or seroconversion or seroconvert or seroprevalence or seroincidence or seroepidemiolog* or serosurvey or sero-survey or survey or screen* or diagnostic test)                                                                                                                                                                                     |
| 13 | #12 AND #10 AND #7                                                                                                                                                                                                                                                                                                                                                             |
| 14 | #11 AND #7                                                                                                                                                                                                                                                                                                                                                                     |
| 15 | TI=(antibod* or immunoglobulin* or immune globulin* or titer* or isotype* or IgG or IgM or IgA or neutralization or sera or serolog* or saliva or serum).                                                                                                                                                                                                                      |
| 16 | #15 AND #7                                                                                                                                                                                                                                                                                                                                                                     |
| 17 | #16 OR #14 OR #13                                                                                                                                                                                                                                                                                                                                                              |

Database: Europe PMC [Secondary search for pre-prints]  
 Dates: January 1, 2020 to December 31, 2020

| # | Searches                                                                                                                                                                                                                                                                                                                                                                                                                                                                              |
|---|---------------------------------------------------------------------------------------------------------------------------------------------------------------------------------------------------------------------------------------------------------------------------------------------------------------------------------------------------------------------------------------------------------------------------------------------------------------------------------------|
|   | ("2019-nCoV" OR "2019nCoV" OR "COVID-19" OR "SARS-CoV-2" OR "COVID19" OR "COVID" OR "SARS-nCoV" OR ("wuhan" AND "coronavirus") OR "Coronavirus" OR "Corona virus" OR "corona-virus" OR "corona viruses" OR "coronaviruses" OR "SARS-CoV" OR "Severe Acute Respiratory Syndrome Coronavirus" OR ("SARS" AND "coronavirus")) AND ABSTRACT:(sera* OR sero* OR immun* OR Ig* OR "enzyme-linked immunosorbent assay" OR ELISA OR "neutralization assay" OR seroprevalence) AND (SRC:"PPR") |

**Sources: Health organizations**

Dates: January 1, 2020 to December 31, 2020

| Source                                                   | Search strategy |                                                                   |
|----------------------------------------------------------|-----------------|-------------------------------------------------------------------|
| WHO Situation Reports                                    | 1               | “antibod”, “sero”, “immun”, “ELISA”                               |
| National Institutes of Health                            | 1               | ("COVID" OR "SARS-CoV-2")                                         |
|                                                          | 2               | ("sero*" OR "antibod*" OR "immun*" OR "RDT" OR "ELISA" OR "LFIA") |
|                                                          | 3               | allintext:(1 AND 2) site:.nih.gov -site:ncbi.nlm.nih.gov          |
|                                                          | 3               | 2 AND 3                                                           |
| United States Centres for Disease Control and Prevention | 1               | ("COVID" OR "SARS-CoV-2")                                         |
|                                                          | 2               | ("sero*" OR "antibod*" OR "immun*" OR "RDT" OR "ELISA" OR "LFIA") |
|                                                          | 3               | allintext:(1 AND 2) site:cdc.gov                                  |
|                                                          | 5               | 2 AND 3                                                           |
| European Centres for Disease Control and Prevention      | 1               | ("COVID" OR "SARS-CoV-2")                                         |
|                                                          | 2               | ("sero*" OR "antibod*" OR "immun*" OR "RDT" OR "ELISA" OR "LFIA") |
|                                                          | 3               | allintext:(1 AND 2) site:ecdc.europa.eu                           |
|                                                          | 5               | 2 AND 3                                                           |

**Sources: Google News**

Dates: January 1, 2020 to December 31, 2020

| Source      | Search strategy |                                                                                                                                                                                               |
|-------------|-----------------|-----------------------------------------------------------------------------------------------------------------------------------------------------------------------------------------------|
| Google news | 1               | (antibody OR antibodies OR surveillance OR screen OR serology OR serological OR serosurvey OR ELISA OR LFIA OR assay OR blood OR serum OR immune OR immunity OR herd immunity OR random test) |

### S3 File. Tool for assessing study risk of bias

| Item 1: Was the sample frame appropriate to address the target population? |                                                                                                                                                                                                                                                                                                                                                                                                                                                                                                                                                                                                                                                                                                                                                                                         |
|----------------------------------------------------------------------------|-----------------------------------------------------------------------------------------------------------------------------------------------------------------------------------------------------------------------------------------------------------------------------------------------------------------------------------------------------------------------------------------------------------------------------------------------------------------------------------------------------------------------------------------------------------------------------------------------------------------------------------------------------------------------------------------------------------------------------------------------------------------------------------------|
| Yes                                                                        | Sample frame described and it approximated the target population                                                                                                                                                                                                                                                                                                                                                                                                                                                                                                                                                                                                                                                                                                                        |
| No                                                                         | Sample frame did not approximate the target population (e.g., blood donors do not represent general population, doctors do not represent all health care providers)                                                                                                                                                                                                                                                                                                                                                                                                                                                                                                                                                                                                                     |
| Exclude                                                                    | Sample frame not described                                                                                                                                                                                                                                                                                                                                                                                                                                                                                                                                                                                                                                                                                                                                                              |
| *Notes                                                                     | The term “target population” should not be taken to infer every individual from everywhere or with similar disease or exposure characteristics. Instead, give consideration to specific population characteristics in the study, including age range, gender, morbidities, medications, and other potentially influential factors. For example, a sample frame may not be appropriate to address the target population if a certain group has been used (such as those working for one organisation, or one profession) and the results then inferred to the target population (i.e. working adults). A sample frame may be appropriate when it includes almost all the members of the target population (i.e. a census, or a complete list of participants or complete registry data). |

| Item 2: Were study participants recruited in an appropriate way? |                                                                                                            |
|------------------------------------------------------------------|------------------------------------------------------------------------------------------------------------|
| Yes                                                              | Probability sampling method (simple or stratified random) or entire sample (e.g., an entire town) was used |
| No                                                               | Non-probability sampling                                                                                   |
| Exclude                                                          | Sampling method not reported                                                                               |

| Item 3: Was the sample size adequate? |                                                                                                                                                                                                                                                                                                                                                                                                                                                                                                                                                                                                                                                                                                                                                                                                                                                                                |
|---------------------------------------|--------------------------------------------------------------------------------------------------------------------------------------------------------------------------------------------------------------------------------------------------------------------------------------------------------------------------------------------------------------------------------------------------------------------------------------------------------------------------------------------------------------------------------------------------------------------------------------------------------------------------------------------------------------------------------------------------------------------------------------------------------------------------------------------------------------------------------------------------------------------------------|
| Yes                                   | ≥599                                                                                                                                                                                                                                                                                                                                                                                                                                                                                                                                                                                                                                                                                                                                                                                                                                                                           |
| No                                    | <599                                                                                                                                                                                                                                                                                                                                                                                                                                                                                                                                                                                                                                                                                                                                                                                                                                                                           |
| Exclude                               | Sample size not reported                                                                                                                                                                                                                                                                                                                                                                                                                                                                                                                                                                                                                                                                                                                                                                                                                                                       |
| *Notes                                | <p>To calculate the required sample size we used an assumed prevalence of 2.5%, which was the global average estimated by the WHO in April, 2020.<sup>1</sup> Based on guidance by the Joanna Briggs Institute and published medical statistical recommendations we selected a precision value that was half the assumed prevalence (1.25%)<sup>2,3</sup> We calculated a minimum sample size of 599 using these inputs:</p> <p>Sample size calculation: <math>n = \frac{Z^2 P(1-P)}{d^2}</math></p> <p>Where n = sample size;<br/>           Z = Z statistic for level of confidence (95%);<br/>           P = expected prevalence (2.5% WHO global estimate);<br/>           d = precision (1.25%)</p> <p>In cases where the sample size calculation was provided and the required sample for 80% power was below our threshold (n&lt;599), this item was marked as yes.</p> |

| Item 4: Were the study subjects and setting described in detail? |                                                                                      |
|------------------------------------------------------------------|--------------------------------------------------------------------------------------|
| Yes                                                              | Average age and distribution of gender/sex provided                                  |
| No                                                               | Neither age or gender/sex is provided, or only one of age and gender/sex is provided |



| <b>Item 5: Was data analysis conducted with sufficient coverage of the identified sample?</b> |                                                                                                                                      |
|-----------------------------------------------------------------------------------------------|--------------------------------------------------------------------------------------------------------------------------------------|
| Yes                                                                                           | The demographic characteristics (gender/sex, age, and ethnicity) of the sample is at least somewhat representative of the population |
| No                                                                                            | The demographic characteristics (gender/sex, age, and ethnicity) of the sample is not representative of the population               |
| Unclear                                                                                       | Information is not provided about demographic characteristics of the sample (gender/sex, age, and ethnicity)                         |

| <b>Item 6: Were valid methods used for the identification of the condition?</b> |                                                                                                                                                                                               |
|---------------------------------------------------------------------------------|-----------------------------------------------------------------------------------------------------------------------------------------------------------------------------------------------|
| Yes                                                                             | The test used met the FDA standards for Emergency Use Authorizations for COVID-19 serological tests: sensitivity minimum 90%, specificity minimum 95%, as reported in the study. <sup>4</sup> |
| No                                                                              | The test used did not meet the FDA standards for Emergency Use Authorizations for COVID-19 serological tests: sensitivity minimum 90%, specificity minimum 95%.                               |
| Exclude                                                                         | Test sensitivity and specificity not reported                                                                                                                                                 |

| <b>Item 7: Was the condition measured in a standard, reliable way for all participants?</b> |                                                                                 |
|---------------------------------------------------------------------------------------------|---------------------------------------------------------------------------------|
| Yes                                                                                         | The same serology test was used for all participants                            |
| No                                                                                          | Different serology tests were used for participants                             |
| Unclear                                                                                     | No details were provided about which participants received which serology tests |

| <b>Item 8: Was there appropriate statistical analysis?</b> |                                                                                                                                                                                                                                                                                                                                                                                    |
|------------------------------------------------------------|------------------------------------------------------------------------------------------------------------------------------------------------------------------------------------------------------------------------------------------------------------------------------------------------------------------------------------------------------------------------------------|
| Yes                                                        | Does all of the following: corrects for population characteristics or the sample is somewhat representative of the population (probability sampling), corrects for test characteristics), and provides the information necessary to determine the numerator, denominator, prevalence estimate, and confidence interval.                                                            |
| No                                                         | Does not correct for population characteristics and the sample is not likely representative of the population (non-probability sampling), does not correct for test or provide the information necessary to correct for test characteristics, or does not provide the information necessary to determine the numerator, denominator, prevalence estimate, and confidence interval. |

| <b>Item 9: Was the response rate adequate, and if not, was the low response rate managed appropriately?</b> |                                                                                                                              |
|-------------------------------------------------------------------------------------------------------------|------------------------------------------------------------------------------------------------------------------------------|
| Yes                                                                                                         | Response rate > 60% or the demographics of the sample were a reasonable match to those of the target population <sup>5</sup> |
| No                                                                                                          | Response rate < 60% and the demographics of the sample were not a reasonable match to those of the target population         |
| Unclear                                                                                                     | Response rate not provided and it was unclear if the demographics of the sample differed from the target population          |

| <b>Item 10: Overall risk of bias</b> |                                                                                                                                                                                                                                                                                                                                                                                                                                                                                                                                                                                                                                                                                                        |
|--------------------------------------|--------------------------------------------------------------------------------------------------------------------------------------------------------------------------------------------------------------------------------------------------------------------------------------------------------------------------------------------------------------------------------------------------------------------------------------------------------------------------------------------------------------------------------------------------------------------------------------------------------------------------------------------------------------------------------------------------------|
| Low                                  | The estimates are very likely correct for the target population. To obtain a low risk of bias classification, all criteria must be met or departures from the criteria must be minimal and unlikely to impact on the validity and reliability of the prevalence estimate. These include sample sizes that are just below the threshold when all other criteria are met, reporting only some of characteristics of the sample, test characteristics below the threshold but corrections for the test performance, and response rates that are just below the threshold in the context of probability based sampling of an appropriate sampling frame with population weighted seroprevalence estimates. |
| Moderate                             | The estimates are likely correct for the target population. To obtain a moderate risk of bias classification, most criteria must be met and departures from the criteria are likely to have only a small impact on the validity and reliability of the prevalence estimates.                                                                                                                                                                                                                                                                                                                                                                                                                           |
| High                                 | The estimates are not likely correct for the target population. To obtain a high risk of bias, many criteria must not be met or departures from criteria are likely to have a major impact on the validity and reliability of the prevalence estimates.                                                                                                                                                                                                                                                                                                                                                                                                                                                |
| Unclear                              | There was insufficient information to assess the risk of bias.                                                                                                                                                                                                                                                                                                                                                                                                                                                                                                                                                                                                                                         |

## S4 File. Additional data analysis details

### Data Processing and Descriptive Statistics

Data processing and descriptive statistics were conducted in Python. The packages used were as follows: data manipulation: numpy, pandas, geopandas; Bayesian analysis: PyStan, arviz; regression modelling: statsmodels; data visualization: matplotlib, seaborn.

### Grouping variables for analysis

Each study was grouped according to Global Burden of Disease (GBD) region<sup>6,7</sup>

#### Age

Estimates were classified into four groups based on the reported ages of the included study participants: children and youth (0-17), adults (18-64), and seniors (65+). The following rules were used to categorize estimates when studies included participants of different ages:

- Participant age mean/median: select the category that it falls within
  - Participant age mean +/- SD: selected all categories within one standard deviation on either side of the mean
  - Participant age median and interquartile range: selected all categories that were included in the interquartile range
- Total age ranges: The age range needed to cover 30% or more of an age category to be classified in that category. As such, thresholds defining 30% for each category were defined.
  - Children and youth: Include "Children and youth" tag if age minimum was 12 or lower.
  - Adults: Include "Adults" tag if age minimum was 57 or lower
  - Adults: Include "Adults" tag if age maximum was 25 or higher.
  - Adults: Include "Adults" tag if age not reported but sample frame was health care workers
  - Seniors: Include "Seniors" tag if age maximum was 70 or higher.
    - For the seniors category, an upper limit of 72 was used (WHO reported world-wide life expectancy) in order to determine a 30% overlap<sup>8</sup>

#### Dates

When explicit dates were not provided, we inferred dates based on the reporting sampling where possible using the following rules:

- Description of a single month: selected first and last date of month
  - Example: "Samples were gathered in April" = April 1 - 30
- Description of a full month as part of a range: selected mid-month
  - Example: "Samples were gathered from April to June" = April 15 to June 15
- Description of early month: selected first two weeks as start and end end (14 days)
  - Example: "Samples were gathered in early April" = April 1 to April 13
- Description of mid-month: selected middle two weeks (14 days)
  - Example: "Samples were gathered in mid April" = April 6 to April 19
- Description of late month: selected the last two weeks as start and end date (14 days)
  - Example: "Samples were gathered in late April" = April 17 to April 30

### Test correction

The sensitivity and specificity values for correction were derived, in order of preference, from: (i) the FINDDx-McGill database of independent evaluations of serological tests<sup>9</sup>; (ii) independent test evaluations conducted by serosurvey investigators and reported alongside serosurvey findings; (iii) manufacturer-reported sensitivity and specificity; (iv) published pooled sensitivity and specificity by immunoassay type.<sup>10</sup> If uncorrected estimates were unavailable, we used author-reported corrected seroprevalence estimates in lieu of performing our own correction. When none of the above corrections were possible, we excluded estimates from further analysis. Details of this order of priority follow:

1. The FINDDx-McGill database of independent evaluations of serological tests.<sup>9</sup> We only considered evaluations reporting both sensitivity and specificity for test performance across all sickness days (as opposed to day 1, day 5, etc). Where multiple evaluations were available, we prioritized in the following order:
  - a. The evaluation needed to match the test name, manufacturer, and target isotype used in the study

- b. The evaluation needed to match the sample specimen type used in the study
    - i. For sample types that were not reported in either the test evaluation or the serosurvey study we assumed whole blood was used for LFIA tests and serum/plasma was used for non-LFIA tests
    - ii. Plasma/Serum were used interchangeable when no direct match for index sample type was available
  - c. Prioritized reference specimen type which yield the most virus according to a systematic review and meta-analysis published in July 2020 that compared RT-PCR positivity of different specimens<sup>11</sup>
    - i. It was assumed that “respiratory specimen” was referring to upper respiratory specimen as a conservative assumption as these viral loads are lower than bronchoalveolar lavage or sputum. We ranked it along side throat swab.
    - ii. “Lower respiratory specimen” was ranked with with bronchoalveolar lavage fluid
    - iii. “Upper respiratory specimen” was ranked with throat swab
    - iv. If a mixed reference sample was used in the independent evaluation then an even distribution of sample types was assumed; the average % yield of the viral load was calculated and the sample type was ranked accordingly
  - d. Largest sample size
2. Serological test evaluations conducted by study authors, where those authors were at arms-length from the design of the study in questions
  3. Manufacturer-reported sensitivity and specificity, which includes evaluations of in-house serological tests published by the research group that developed the same test
  4. Published pooled sensitivity and specificity results for ELISAs, LFIAs, and CLIAs, based on the test type known to have been used, and using the definitions for these test types provided in the cited article.<sup>10</sup>

Where evaluation sample sizes were not reported (primarily for manufacturer-conducted evaluations), we used the minimum required sample sizes for US Food and Drug Administration Emergency Use Authorization approval (30 true positive samples, 80 true negative samples).

Using the best available sensitivity and specificity values and the corresponding denominators, we corrected seroprevalence estimates for test sensitivity and specificity using Bayesian measurement error models, with binomial test evaluation data for test sensitivity and specificity, as described in Section 2 of Gelman and Carpenter (2020).<sup>12</sup> We built the Bayesian model described therein using the statistical package PyStan.

For each seroprevalence estimate, we used the matching seroprevalence, sensitivity, and specificity, and the corresponding denominators, to fit the specified model. The model was fit with four chains and 2000 iterations per chain (1000 warmup, 1000 sampling iterations). A model fit was considered “good” if said fit met all five of PyStan’s Hamiltonian Monte Carlo diagnostic criteria (no iterations ending with a divergence, no iterations saturating the max tree depth of 10, effective Bayesian fraction of missing information over 0.2 for all chains, a R-hat value between 0.9 and 1.1 for all parameters, the effective sample size  $n_{\text{eff}}$  being at least  $0.001 \times$  the number of iterations).<sup>13</sup> Model fits not meeting these criteria were discarded, and the model was rerun until five good fits were obtained for each seroprevalence estimate.

Corrected seroprevalence values were obtained for each model fit by taking the expectation of the true prevalence parameter across all sampling iterations. For each seroprevalence estimate, the corrected seroprevalence was taken to be the median corrected seroprevalence across the five good model fits. The credible interval was defined as the highest posterior density interval (equivalent to the shortest credible interval for these unimodal distributions), and was calculated using the `hpd` function from the `arviz` package.

### Selecting summary seroprevalence estimates

Some studies did not report a single overall seroprevalence estimate. In most cases, this was because the study reported different sets of results for different non-overlapping subsets of the data: e.g., for multiple non-overlapping time points (e.g., May and June 2020), multiple distinct populations (e.g., teachers and schoolchildren), or multiple non-overlapping regions (e.g., two regions of the same city). Articles that provided information on two or more distinct cohorts (different sample frames or different samples at different time points) without a pooled estimate were considered to be multiple studies.

In some cases, studies did not report a single overall seroprevalence estimate because they reported different sets of results for different assays. When studies reported estimates derived from multiple assays used in combination, we prioritized a sub-group estimate based on a single test using the following prioritization (i) independent evaluation available; (ii) pan-Ig: IgG +/- IgM/IgA; IgM +/- IgA; IgA; (iii); highest combined sensitivity and specificity value. These prioritization criteria were designed to minimize bias: using data from independent evaluations is the most reliable way to correct seroprevalence estimates for test sensitivity and specificity; non-IgG antibodies appear to decline over time, especially among individuals without repeated exposure, while IgG antibodies against the spike protein appear to persist for at least three to five months after infection; and estimates that use tests with the highest sensitivity and specificity likely exhibit the least bias to begin with.<sup>14-17</sup>

### **Population differences in seroprevalence**

Male and female estimates were included in the sex/gender analysis, with Female as the reference group. Estimates from Caucasian, Black, Asian, Indigenous, and Multi-racial/other racial groups were included for the race/ethnicity analysis, with Caucasian as the reference group. Children and youth (0-17), adult (18-64), and older adult (65+) estimates were included for the age analysis, with adults as the reference group. Health care workers and caregivers and the general population were included in the occupation analysis. Known and no known contact with a positive COVID-19 case were included in the exposure level analysis.

## **S5 File. Methods for selecting and gathering data on cumulative incidence and population size**

### **Evidence-based timeline for COVID-19 clinical course and cumulative case data collection**

- Day 0: Symptom onset
  - FYI: Exposure occurs a mean of -5 days from symptom onset<sup>15</sup>
- Day 5: Confirmation on pneumonia
  - Median of 5 days from symptom onset to confirmation of pneumonia<sup>18,19</sup>
  - This is the assumed date of diagnosis
- Day 7: Presentation to hospital
  - Median of 7 days from symptom onset to presentation to hospital<sup>20</sup>
  - Alternative assumption for day of diagnosis
- Day 14: Seroconversion
  - Median of 14 days from symptom onset to seroconversion (IgG)<sup>21</sup>

### **Data collection decisions**

The cumulative case date of -9 days before serosurvey sampling end date was selected for analyses based on the evidence above. This assumes that the day of radiological confirmation of pneumonia is similar to the reporting date for laboratory confirmed cases of COVID-19, accounting for reporting delays. This corresponds to a median of 5 days after symptom onset and assumes a median of 14 days from symptom onset to seroconversion

### **Sources of data on cumulative incidence and population size**

For studies reporting population-wide seroprevalence estimates, we gathered the number of total confirmed SARS-CoV-2 infections at nine days before the study end-date. We extracted case and population data at the country level for national studies. Our sources were the Johns Hopkins University (JHU) COVID-19<sup>22</sup> tracker with population denominators from the UN Population Division estimates.<sup>23</sup> Using these data we calculated cases per 100,000 population for each country.

## References for supplementary files

1. Boseley S. WHO warns that few have developed antibodies to Covid-19. The Guardian [Internet]. 2020 Apr 20; Available from: <https://www.theguardian.com/society/2020/apr/20/studies-suggest-very-few-have-had-covid-19-without-symptoms>
2. Munn Z, Moola S, Lisy K, Riitano D, Tufanaru C. Methodological guidance for systematic reviews of observational epidemiological studies reporting prevalence and cumulative incidence data. *Int J Evid Based Healthc*. 2015 Sep;13(3):147–53.
3. Naing L, Winn T, Ruslil B. Practical issues in calculating the sample size for prevalence studies. *Arch Orofac Sci*. 2006;1:9–14.
4. U.S. Food & Drug Administration. Emergency Use Authorization for SARS-CoV-2 Antibody Tests [Internet]. 2020 [cited 2020 May 5]. Available from: <https://www.fda.gov/media/137470/download>.
5. Morton MBS, Bandara DK, Robinson EM, Carr PEA. In the 21<sup>st</sup> century, what is an acceptable response rate? *Aust N Z J Public Health*. 2012 April; 36 (2): 106-8.
6. Institute for Health Metrics and Evaluation. Global Burden of Disease Study 2019 (GBD 2019) Data Resources [Internet]. [cited 2020 Nov 11]. Available from: <http://ghdx.healthdata.org/gbd-2019>;
7. Institute for Health Metrics and Evaluation. Institute for Health Metrics and Evaluation Frequently Asked Questions [Internet]. [cited 2020 Nov 11]. Available from: <http://www.healthdata.org/gbd/faq>
8. World Health Organization. Mortality and global health estimates [Internet]. World Health Data Platform. 2020. Available from: <https://www.who.int/data/gho/data/themes/mortality-and-global-health-estimates>
9. FIND. SARS-CoV-2 diagnostics: performance data [Internet]. 2020. Available from: <https://www.finddx.org/covid-19/dx-data/>
10. Lisboa Bastos M, Tavaziva G, Abidi SK, Campbell JR, Haraoui L-P, Johnston JC, et al. Diagnostic accuracy of serological tests for covid-19: systematic review and meta-analysis. *BMJ*. 2020 Jul 1;370:m2516.
11. Bwire GM, Majigo MV, Njiro BJ, Mawazo A. Detection profile of SARS-CoV-2 using RT-PCR in different types of clinical specimens: A systematic review and meta-analysis. *J Med Virol* [Internet]. 2020 Jul 24 [cited 2020 Nov 12];n/a(n/a). Available from: <https://doi.org/10.1002/jmv.26349>
12. Gelman A, Carpenter B. Bayesian analysis of tests with unknown specificity and sensitivity. *J R Stat Soc Ser C Appl Stat*. 2020 Nov 1;69(5):1269–83.
13. Betancourt M. A Conceptual Introduction to Hamiltonian Monte Carlo. *ArXiv170102434 Stat* [Internet]. 2018 Jul 15 [cited 2020 Nov 12]; Available from: <http://arxiv.org/abs/1701.02434>
14. Bolotin S, Tran V, Osman S, Brown KA, Buchan SA, Joh E, et al. SARS-CoV-2 seroprevalence survey estimates are affected by anti-nucleocapsid antibody decline. *medRxiv*. 2020 Jan 1;2020.09.28.20200915.
15. Ward H, Cooke G, Atchison C, Whitaker M, Elliott J, Moshe M, et al. Declining prevalence of antibody positivity to SARS-CoV-2: a community study of 365,000 adults. *medRxiv*. 2020 Jan 1;2020.10.26.20219725.
16. Wajnberg A, Amanat F, Firpo A, Altman DR, Bailey MJ, Mansour M, et al. Robust neutralizing antibodies to SARS-CoV-2 infection persist for months. *Science*. 2020 Oct 28;eabd7728.
17. Isho B, Abe KT, Zuo M, Jamal AJ, Rathod B, Wang JH, et al. Persistence of serum and saliva antibody responses to SARS-CoV-2 spike antigens in COVID-19 patients. *Sci Immunol*. 2020 Oct 8;5(52):eabe5511.
18. Wilson N, Kvalsvig A, Barnard LT, Baker M. Case-Fatality Risk Estimates for COVID-19 Calculated by Using a Lag Time for Fatality. *Emerg Infect Dis J*. 2020;26(6):1339.
19. Vanella P, Wiessner C, Holz A, Krause G, Moehl A, Wiegel S, et al. The role of age distribution, time lag between reporting and death and healthcare system capacity on case fatality estimates of COVID-19. *medRxiv*. 2020 Jan 1;2020.05.16.20104117.
20. Wiersinga WJ, Rhodes A, Cheng AC, Peacock SJ, Prescott HC. Pathophysiology, Transmission, Diagnosis, and Treatment of Coronavirus Disease 2019 (COVID-19): A Review. *JAMA*. 2020 Aug 25;324(8):782–93.
21. Guo L, Ren L, Yang S, Xiao M, Chang D, Yang F, et al. Profiling Early Humoral Response to Diagnose Novel Coronavirus Disease (COVID-19). *Clin Infect Dis*. 2020 Jul 28;71(15):778–85.
22. Dong E, Du H, Gardner L. An interactive web-based dashboard to track COVID-19 in real time. *Lancet Infect Dis*. 2020 May;20(5):533–4.
23. United Nations, Department of Economics and Social Affairs, Population Division. 2019 Revision of World Population Prospects [Internet]. [cited 2020 Nov 11]. Available from: <https://population.un.org/wpp/>

## Supplementary tables

### S1 Table. Characteristics and primary results of studies reporting population-wide seroprevalence estimates

| Article Author (Study Organization)                                     | Sampling Dates (YMD)     | Location        | Geographic Scope | Overall Risk of Bias | Sample Size | Age                                                                                                                                 | Female (%) | Sampling method | Sample frame                    | Uncorrected Seroprevalence (95% Confidence Interval) | Test Manufacturers   Names   Isotypes                                                                                                            | Test Sens, Spec (Source)                          | Corrected Seroprevalence (95% Credible Interval) |
|-------------------------------------------------------------------------|--------------------------|-----------------|------------------|----------------------|-------------|-------------------------------------------------------------------------------------------------------------------------------------|------------|-----------------|---------------------------------|------------------------------------------------------|--------------------------------------------------------------------------------------------------------------------------------------------------|---------------------------------------------------|--------------------------------------------------|
| <b>Central Europe, Eastern Europe, and Central Asia</b>                 |                          |                 |                  |                      |             |                                                                                                                                     |            |                 |                                 |                                                      |                                                                                                                                                  |                                                   |                                                  |
| <b>Bulgaria</b>                                                         |                          |                 |                  |                      |             |                                                                                                                                     |            |                 |                                 |                                                      |                                                                                                                                                  |                                                   |                                                  |
| Tsaneva-Damyanova (Medical Diagnostic Laboratory "STATUS") <sup>2</sup> | 2020-03-26 to 2020-04-20 | Varna   Varna   | Local            | High                 | 586         | NR                                                                                                                                  | 56.1       | Non-probability | Residual sera                   | 4.8% (3.2-6.8%)                                      | "Zhejiang Orient Gene Biotech Co.; LTD"   COVID-19 IgG / IgM Rapid Test Cassette   IgG, IgM                                                      | 0.4%, 1.0% (FINDDx / MUHC independent evaluation) | -                                                |
| <b>Czechia</b>                                                          |                          |                 |                  |                      |             |                                                                                                                                     |            |                 |                                 |                                                      |                                                                                                                                                  |                                                   |                                                  |
| Bloomfield (Charles University and Thomayer's Hospital) <sup>7</sup>    | 2020-07-03 to 2020-08-19 | Prague   Prague | Sublocal         | High                 | 200         | 0-12 months (n=13); 1-5 years (n=52); 6-11 years (n=65); 12-18 years (n=70)                                                         | 45.5       | Non-probability | Residual sera                   | 0.0% (0.0-0.5%)                                      | Roche Diagnostics   Elecsys Anti-SARS-CoV-2 assay   NR                                                                                           | 99.5%, 99.8% (Used author-adjusted estimate)      | 0.0% (0.0-1.2%)                                  |
| <b>Estonia</b>                                                          |                          |                 |                  |                      |             |                                                                                                                                     |            |                 |                                 |                                                      |                                                                                                                                                  |                                                   |                                                  |
| Jogi (University of Tartu) <sup>9</sup>                                 | 2020-05-08 to 2020-07-31 | Saaremaa        | Local            | Moderate             | 954         | 0-9 (n=101); 10-19 (N=110); 20-29 (n=104); 30-39 (n=121); 40-49 (n=114); 50-59 (n=113); 60-69 (n=112); 70-79 (n=112); 80-100 (n=67) | 61.7       | Probability     | Household and community samples | 6.3% (5.0-7.9%)                                      | Abbott; DiaSorin; SD Biosensor   Abbott Architect SARS-CoV-2 IgG, Liaison DiaSorin IgG, Biosensor IgM/IgG test, Neutralization assays   IgG, IgM | No data                                           | -                                                |
| Jogi (University of Tartu) <sup>9</sup>                                 | 2020-05-08 to 2020-07-31 | Tallinn         | Local            | Moderate             | 1006        | 0-9 (n=106); 10-19 (n=107); 20-29 (n=111); 30-39 (n=117); 40-49 (n=120); 50-59 (n=117);                                             | 55.9       | Probability     | Household and community samples | 1.5% (0.9-2.5%)                                      | Abbott; DiaSorin; SD Biosensor   Abbott Architect SARS-CoV-2                                                                                     | No data                                           | -                                                |



| Article Author (Study Organization)                                                                                | Sampling Dates (YMD)     | Location                       | Geographic Scope | Overall Risk of Bias | Sample Size | Age                                                                                                                                  | Female (%) | Sampling method | Sample frame                    | Uncorrected Seroprevalence (95% Confidence Interval) | Test Manufacturers   Names   Isotypes                                                                       | Test Sens, Spec (Source)                                                             | Corrected Seroprevalence (95% Credible Interval) |
|--------------------------------------------------------------------------------------------------------------------|--------------------------|--------------------------------|------------------|----------------------|-------------|--------------------------------------------------------------------------------------------------------------------------------------|------------|-----------------|---------------------------------|------------------------------------------------------|-------------------------------------------------------------------------------------------------------------|--------------------------------------------------------------------------------------|--------------------------------------------------|
|                                                                                                                    |                          |                                |                  |                      |             | 60-69 (n=116);<br>70-79 (n=114);<br>80-100 (n=98)                                                                                    |            |                 |                                 |                                                      | IgG, Liaison DiaSorin IgG, Biosensor IgM/IgG test, Neutralization assays   IgG, IgM                         |                                                                                      |                                                  |
| <b>Georgia</b>                                                                                                     |                          |                                |                  |                      |             |                                                                                                                                      |            |                 |                                 |                                                      |                                                                                                             |                                                                                      |                                                  |
| Tsertsvadze (Infectious Diseases, AIDS and Clinical Immunology Research Center) <sup>11</sup>                      | 2020-05-18 to 2020-05-27 | Tbilisi   Tbilisi              | Local            | Moderate             | 1086        | 18-64 (n=964);<br>65+ (n=104)                                                                                                        | 62.8       | Non-probability | Household and community samples | 1.0% (0.4-2.2%)                                      | Zhejiang Orient Gene Biotech Co Ltd   COVID 19 IgG/IgM Rapid Test Cassette   IgG                            | 93.1%, 99.2% (Used author-adjusted estimate)                                         | 1.0% (0.5-1.7%)                                  |
| <b>Hungary</b>                                                                                                     |                          |                                |                  |                      |             |                                                                                                                                      |            |                 |                                 |                                                      |                                                                                                             |                                                                                      |                                                  |
| Merkely (Semmelweis University) <sup>12</sup>                                                                      | 2020-05-01 to 2020-05-16 |                                | National         | Moderate             | 10474       | Mean 48.7 (SD 18)                                                                                                                    | 53.6       | Probability     | Household and community samples | 0.7% (0.5-0.9%)                                      | Abbott   Abbott Architect SARS-CoV-2 IgG assay   IgG                                                        | 0.7%, 1.0% (FINDDx / MUHC independent evaluation)                                    | -                                                |
| <b>Russian Federation</b>                                                                                          |                          |                                |                  |                      |             |                                                                                                                                      |            |                 |                                 |                                                      |                                                                                                             |                                                                                      |                                                  |
| Popova (Saint-Petersburg Pasteur Research Institute) <sup>17</sup>                                                 | 2020-06-28 to 2020-07-19 | Irkutsk Region                 | Regional         | Moderate             | 2674        | 1-6 (n=102), 7-13 (n=191), 14-17 (n=94), 18-29 (n=385), 30-39 (n=373), 40-49 (n=374), 50-59 (n=386), 60-69 (n=390), Above 70 (n=379) | 67.5       | Probability     | Household and community samples | 5.8% (5.3-6.2%)                                      | State Scientific Center Applied Microbiology and Biotechnology   IFa anti-SARS-CoV-2 IgG   IgG              | 75.6%, 97.6% (Used Bastos SR/MA data; no sens, spec, or author adjustment available) | 4.5% (2.8-6.3%)                                  |
| Popova (Moscow Research Institute of Epidemiology and Microbiology named after V.I.G.N Gabrichevsky) <sup>18</sup> | 2020-06-22 to 2020-07-11 | Central Russia   Moscow Region | Regional         | Unclear              | 2688        | 1-6 (n=111); 7-13 (n=185); 14-17 (n=88); 18-29 (n=384); 30-39 (n=384); 40-49 (n=384); 50-59 (n=384); 60-69 (n=384); 70+ (n=384)      | 71.0       | Probability     | Household and community samples | 21.0%                                                | FBSI "State scientific center for applied microbiology and biotechnology"   ELISA anti-SARS-CoV-2 IgG   IgG | 75.6%, 97.6% (Used Bastos SR/MA data; no sens, spec, or author adjustment available) | 25.4% (23.0-27.8%)                               |

| Article Author (Study Organization)                                                                 | Sampling Dates (YMD)     | Location                      | Geographic Scope | Overall Risk of Bias | Sample Size | Age                                                                                                   | Female (%) | Sampling method | Sample frame                    | Uncorrected Seroprevalence (95% Confidence Interval) | Test Manufacturers   Names   Isotypes                                                          | Test Sens, Spec (Source)                                                             | Corrected Seroprevalence (95% Credible Interval) |
|-----------------------------------------------------------------------------------------------------|--------------------------|-------------------------------|------------------|----------------------|-------------|-------------------------------------------------------------------------------------------------------|------------|-----------------|---------------------------------|------------------------------------------------------|------------------------------------------------------------------------------------------------|--------------------------------------------------------------------------------------|--------------------------------------------------|
| Popova (Saint-Petersburg Pasteur Research Institute of Epidemiology and Microbiology) <sup>19</sup> | 2020-06-23 to 2020-06-26 | Northwestern Federal District | Regional         | High                 | 3130        | 1-17 (n=401), 18-29 (n=464), 30-39 (n=474), 40-49 (n=510), 50-59 (n=480), 60-69 (n=422), 70+ (n=379)  | NR         | Probability     | Household and community samples | 20.7%                                                | State Scientific Center of Applied Microbiology and Biotechnology (Obolensk)   NR   IgG        | 75.6%, 97.6% (Used Bastos SR/MA data; no sens, spec, or author adjustment available) | 24.9% (22.5-27.3%)                               |
| Barchuk (European University At St Petersburg) <sup>20</sup>                                        | 2020-05-27 to 2020-06-26 | Saint Petersburg              | Local            | Low                  | 988         | 18-34 (n=396); 35-49 (n=357); 50-64 (n=218); 65+ (n=67)                                               | 66.0       | Probability     | Household and community samples | 9.1% (7.2-10.9%)                                     | Genetico   CoronaPass total antibodies test   NR                                               | 98.7%, 100.0% (Used author-adjusted estimate)                                        | 9.1% (7.3-10.9%)                                 |
| Popova (Saint-Petersburg Pasteur Research Institute of Epidemiology and Microbiology) <sup>21</sup> | 2020-06-15 to 2020-06-20 | Saint-Petersburg              | Local            | High                 | 2713        | 1-17 (n=377); 18-29 (n=390); 30-39 (n=416); 40-49 (n=395); 50-59 (n=413); 60-69 (n=442); >=70 (n=280) | NR         | Probability     | Household and community samples | 26.0% (24.3-27.7%)                                   | State Scientific Center for Applied Microbiology and Biotechnologies (Obolensk)   NR   IgG     | 75.6%, 97.6% (Used Bastos SR/MA data; no sens, spec, or author adjustment available) | 32.2% (29.5-34.9%)                               |
| Popova (Saint Petersburg Pasteur Institute) <sup>22</sup>                                           | 2020-06-07 to 2020-06-20 | Tyumen region                 | Regional         | High                 | 2758        | 1-17 (n=356), 18-29 (n=485), 30-39 (n=452), 40-49 (n=447), 50-59 (n=482), 60-69 (n=387), >70 (n=149)  | NR         | Probability     | Household and community samples | 24.5% (22.9-26.1%)                                   | State Research Center for Applied Microbiology and Biotechnology of Rospotrebnadzor   NR   IgG | 75.6%, 97.6% (Used Bastos SR/MA data; no sens, spec, or author adjustment available) | 30.1% (27.6-32.9%)                               |
| Tickle (City of Moscow) <sup>23</sup>                                                               | 2020-06-05 to 2020-06-18 | Central Russia   Moscow       | Local            | High                 | 90000       | NR                                                                                                    | NR         | Probability     | Household and community samples | 19.9%                                                | NR   NR   NR                                                                                   | No data                                                                              | -                                                |
| Kiselyov (Russian National Council for Combating Coronavirus) <sup>25</sup>                         | Until 2020-06-10         |                               | National         | Moderate             | 650000      | NR                                                                                                    | NR         | Non-probability | Household and community samples | 14.0%                                                | Invitro   NR   NR                                                                              | 95.0%, 98.0% (Test developer / manufacturer evaluation)                              | 12.2% (6.9-16.0%)                                |
| <b>High-income</b>                                                                                  |                          |                               |                  |                      |             |                                                                                                       |            |                 |                                 |                                                      |                                                                                                |                                                                                      |                                                  |
| <b>Andorra</b>                                                                                      |                          |                               |                  |                      |             |                                                                                                       |            |                 |                                 |                                                      |                                                                                                |                                                                                      |                                                  |

| Article Author (Study Organization)                                       | Sampling Dates (YMD)     | Location                                       | Geographic Scope | Overall Risk of Bias | Sample Size | Age                                                                                                                            | Female (%) | Sampling method | Sample frame                    | Uncorrected Seroprevalence (95% Confidence Interval) | Test Manufacturers   Names   Isotypes                                                                 | Test Sens, Spec (Source)                                                             | Corrected Seroprevalence (95% Credible Interval) |
|---------------------------------------------------------------------------|--------------------------|------------------------------------------------|------------------|----------------------|-------------|--------------------------------------------------------------------------------------------------------------------------------|------------|-----------------|---------------------------------|------------------------------------------------------|-------------------------------------------------------------------------------------------------------|--------------------------------------------------------------------------------------|--------------------------------------------------|
| Royo-Cebrecos (ISGlobal) <sup>26</sup>                                    | 2020-05-04 to 2020-05-28 |                                                | National         | Moderate             | 70494       | Mean 40.4 (SD 20)                                                                                                              | 44.6       | Non-probability | Household and community samples | 11.0%                                                | nCOV 2019 IgG/IgM-Zhuhai Livzon Diagnostics; Inc.   Livzon® rapid test   IgG, IgM                     | 0.7%, 0.6% (FINDDx / MUHC independent evaluation)                                    | -                                                |
| <b>Argentina</b>                                                          |                          |                                                |                  |                      |             |                                                                                                                                |            |                 |                                 |                                                      |                                                                                                       |                                                                                      |                                                  |
| Muñoz (Ministerio de Salud de la Provincia de Buenos Aires) <sup>27</sup> | 2020-07-15 to 2020-07-16 | Buenos Aires   Quilmes                         | Sublocal         | Moderate             | 284         | Mean 40 (NR)                                                                                                                   | 60.9       | Non-probability | Household and community samples | 14.8% (11.1-19.5%)                                   | COVIDAR   SEROKIT-ELISA COVIDAR IgG   IgG                                                             | 95.0%, 100.0% (Test developer / manufacturer evaluation)                             | 15.5% (10.1-21.0%)                               |
| <b>Austria</b>                                                            |                          |                                                |                  |                      |             |                                                                                                                                |            |                 |                                 |                                                      |                                                                                                       |                                                                                      |                                                  |
| Ladage (Danube Private University) <sup>33</sup>                          | 2020-06-01 to 2020-06-15 | Wösendorf, Weißenkirchen, Joching, St. Michael | Local            | High                 | 835         | NR                                                                                                                             | 51.5       | Probability     | Household and community samples | 8.5%                                                 | N/A - Author Designed   N/A - Author Designed   IgG                                                   | 75.6%, 97.6% (Used Bastos SR/MA data; no sens, spec, or author adjustment available) | 8.1% (5.4-10.9%)                                 |
| Knabl (Medical University of Innsbruck) <sup>36</sup>                     | 2020-04-21 to 2020-04-27 | Tyrol   Ischgl                                 | Local            | Moderate             | 1473        | Mean 40.3 (Male); 40.9 (Female); 10.2 (Children); 45.8 (Adults) (SD 19.5 (Male); 20.1 (Female); 4.9 (Children); 16.5 (Adults)) | 51.5       | Probability     | Household and community samples | 42.4% (39.8-44.7%)                                   | EUROIMMUN ; Abbott   Abbott SARS-CoV-2 IgG immunoassay, Euroimmun Anti-SARS-CoV-2 IgG IgA ELISA   IgG | No data                                                                              | -                                                |
| Wagner (Medical University of Vienna) <sup>37</sup>                       | 2020-04-02 to 2020-04-17 | Vienna                                         | Sublocal         | High                 | 1655        | 15-25 (n = 226) ; 25-50 (n = 1031) ; over 50 (n=395) ; ns (n=3)                                                                | 53.5       | Non-probability | Household and community samples | 10.2%                                                | Euroimmun Medizinische Labordiagnostika   Euroimmune®   IgG, IgA                                      | 0.9%, 0.8% (FINDDx / MUHC independent evaluation)                                    | -                                                |
| <b>Belgium</b>                                                            |                          |                                                |                  |                      |             |                                                                                                                                |            |                 |                                 |                                                      |                                                                                                       |                                                                                      |                                                  |
| Herzog (University of Antwerp) <sup>41</sup>                              | 2020-06-29 to 2020-07-04 | Wallonia, Brussels, Flanders                   | National         | Moderate             | 3023        | 0-10 (n=110); 10-20 (n=413); 20-30 (n=394);                                                                                    | 51.3       | Non-probability | Household and                   | 4.5% (3.7-5.4%)                                      | EUROIMMUN   Euroimmun Anti-SARS-                                                                      | 0.8%, 1.0% (FINDDx / MUHC                                                            | -                                                |

| Article Author (Study Organization)          | Sampling Dates (YMD)     | Location                     | Geographic Scope | Overall Risk of Bias | Sample Size | Age                                                                                                                                                                          | Female (%) | Sampling method | Sample frame                    | Uncorrected Seroprevalence (95% Confidence Interval) | Test Manufacturers   Isotypes                            | Test Sens, Spec (Source)                          | Corrected Seroprevalence (95% Credible Interval) |
|----------------------------------------------|--------------------------|------------------------------|------------------|----------------------|-------------|------------------------------------------------------------------------------------------------------------------------------------------------------------------------------|------------|-----------------|---------------------------------|------------------------------------------------------|----------------------------------------------------------|---------------------------------------------------|--------------------------------------------------|
|                                              |                          |                              |                  |                      |             | 30-40 (n=396);<br>40-50 (n=403);<br>50-60 (n=400);<br>60-70 (n=403);<br>70-80 (n=204);<br>80-90 (n=160);<br>>90 (n=140)                                                      |            |                 | community samples               |                                                      | CoV-2 ELISA<br>IgG   IgG                                 | independent evaluation)                           |                                                  |
| Herzog (University of Antwerp) <sup>41</sup> | 2020-06-08 to 2020-06-13 | Wallonia, Brussels, Flanders | National         | Moderate             | 2960        | 0-10 (n=124);<br>10-20 (n=375);<br>20-30 (n=383);<br>30-40 (n=395);<br>40-50 (n=394);<br>50-60 (n=393);<br>60-70 (n=399);<br>70-80 (n=201);<br>80-90 (n=166);<br>>90 (n=130) | 51.9       | Non-probability | Household and community samples | 5.5% (4.7-6.5%)                                      | EUROIMMUN   Euroimmun Anti-SARS-CoV-2 ELISA<br>IgG   IgG | 0.8%, 1.0% (FINDDx / MUHC independent evaluation) | -                                                |
| Herzog (University of Antwerp) <sup>41</sup> | 2020-05-18 to 2020-05-25 | Wallonia, Brussels, Flanders | National         | Moderate             | 3242        | 0-10 (n=174);<br>10-20 (n=431);<br>20-30 (n=414);<br>30-40 (n=424);<br>40-50 (n=411);<br>50-60 (n=419);<br>60-70 (n=417);<br>70-80 (n=236);<br>80-90 (n=163);<br>>90 (n=153) | 51.0       | Non-probability | Household and community samples | 6.9% (5.9-8.0%)                                      | EUROIMMUN   Euroimmun Anti-SARS-CoV-2 ELISA<br>IgG   IgG | 0.8%, 1.0% (FINDDx / MUHC independent evaluation) | -                                                |
| Herzog (University of Antwerp) <sup>41</sup> | 2020-04-20 to 2020-04-26 | Wallonia, Brussels, Flanders | National         | Moderate             | 3397        | 0-10 (n=85);<br>10-20 (n=442);<br>20-30 (n=375);<br>30-40 (n=407);<br>40-50 (n=406);<br>50-60 (n=430);<br>60-70 (n=426);<br>70-80 (n=316);<br>80-90 (n=315);<br>>90 (n=195)  | 52.9       | Non-probability | Household and community samples | 6.0% (5.1-7.1%)                                      | EUROIMMUN   Euroimmun Anti-SARS-CoV-2 ELISA<br>IgG   IgG | 0.8%, 1.0% (FINDDx / MUHC independent evaluation) | -                                                |
| Herzog (University of Antwerp) <sup>41</sup> | 2020-03-30 to 2020-04-05 | Wallonia, Brussels, Flanders | National         | Moderate             | 3910        | 0-10 (n=36);<br>10-20 (n=294);<br>20-30 (n=436);<br>30-40 (n=461);<br>40-50 (n=468);<br>50-60 (n=498);<br>60-70 (n=507);<br>70-80 (n=506);<br>80-90 (n=493);<br>>90 (n=211)  | 54.0       | Non-probability | Household and community samples | 2.9% (2.3-3.4%)                                      | EUROIMMUN   Euroimmun Anti-SARS-CoV-2 ELISA<br>IgG   IgG | 0.8%, 1.0% (FINDDx / MUHC independent evaluation) | -                                                |

| Article Author (Study Organization)                             | Sampling Dates (YMD)     | Location           | Geographic Scope | Overall Risk of Bias | Sample Size | Age                                                              | Female (%) | Sampling method | Sample frame                    | Uncorrected Seroprevalence (95% Confidence Interval) | Test Manufacturers   Names   Isotypes                                 | Test Sens, Spec (Source)                          | Corrected Seroprevalence (95% Credible Interval) |
|-----------------------------------------------------------------|--------------------------|--------------------|------------------|----------------------|-------------|------------------------------------------------------------------|------------|-----------------|---------------------------------|------------------------------------------------------|-----------------------------------------------------------------------|---------------------------------------------------|--------------------------------------------------|
| <b>Canada</b>                                                   |                          |                    |                  |                      |             |                                                                  |            |                 |                                 |                                                      |                                                                       |                                                   |                                                  |
| Canadian Blood Services (Canadian Blood Services) <sup>47</sup> | 2020-11-07 to 2020-11-25 |                    | National         | Moderate             | 17049       | 17-24 (n=1,631); 25-39 (n=4644); 40-59 (n=6382); 60+ (n=4392)    | 43.7       | Non-probability | Blood donors                    | 1.5% (1.3-1.7%)                                      | Abbott   Abbott Architect SARS-CoV-2 IgG assay   IgG                  | 92.7%, 99.9% (Used author-adjusted estimate)      | 1.5% (1.3-1.7%)                                  |
| Canadian Blood Services (Canadian Blood Services) <sup>48</sup> | 2020-10-12 to 2020-10-31 |                    | National         | Moderate             | 16811       | 17-24 (n=1,491); 25-39 (n=4,535); 40-59 (n=6,446); 60+ (n=4,339) | 43.2       | Non-probability | Blood donors                    | 0.9% (0.7-1.0%)                                      | Abbott   Abbott Architect SARS-CoV-2 IgG assay   IgG                  | 92.7%, 99.9% (Used author-adjusted estimate)      | 0.9% (0.7-1.0%)                                  |
| Manny (University of Alberta) <sup>49</sup>                     | 2020-08-14 to 2020-10-23 | Alberta   Edmonton | Local            | High                 | 565         | Mean 10.5 (SD 1.6)                                               | 49.2       | Non-probability | Household and community samples | 1.6%                                                 | Abbott Laboratories   ARCHITECT i2000SR   IgG                         | 0.4%, 1.0% (FINDDx / MUHC independent evaluation) | -                                                |
| Bolotin (Public Health Ontario) <sup>51</sup>                   | 2020-08-01 to 2020-08-21 | Ontario            | Regional         | High                 | 5764        | NR                                                               | NR         | Non-probability | Residual sera                   | 1.6%                                                 | Abbott Laboratories   Abbott Architect Anti-SARS-CoV-2 IgG test   IgG | 0.4%, 1.0% (FINDDx / MUHC independent evaluation) | -                                                |
| Bolotin (Public Health Ontario) <sup>51</sup>                   | 2020-07-04 to 2020-07-31 | Ontario            | Regional         | High                 | 7001        | NR                                                               | NR         | Non-probability | Residual sera                   | 1.4%                                                 | Abbott Laboratories   Abbott Architect Anti-SARS-CoV-2 IgG test   IgG | 0.4%, 1.0% (FINDDx / MUHC independent evaluation) | -                                                |
| Héma-Québec (Héma-Québec) <sup>53</sup>                         | 2020-05-25 to 2020-07-09 | Quebec             | Regional         | Unclear              | 7691        | NR                                                               | NR         | Probability     | Blood donors                    | 2.2%                                                 | NR   NR   NR                                                          | No data                                           | -                                                |
| Bolotin (Public Health Ontario) <sup>51</sup>                   | 2020-06-05 to 2020-06-30 | Ontario            | Regional         | High                 | 7023        | NR                                                               | NR         | Non-probability | Residual sera                   | 1.5%                                                 | USA: Abbott Laboratories   Abbott architect SARSCoV-2 IgG test   IgG  | 0.4%, 1.0% (FINDDx / MUHC independent evaluation) | -                                                |

| Article Author (Study Organization)                                    | Sampling Dates (YMD)     | Location         | Geographic Scope | Overall Risk of Bias | Sample Size | Age                                                         | Female (%) | Sampling method | Sample frame  | Uncorrected Seroprevalence (95% Confidence Interval) | Test Manufacturers   Names   Isotypes                                                                                                                   | Test Sens, Spec (Source)                                                             | Corrected Seroprevalence (95% Credible Interval) |
|------------------------------------------------------------------------|--------------------------|------------------|------------------|----------------------|-------------|-------------------------------------------------------------|------------|-----------------|---------------|------------------------------------------------------|---------------------------------------------------------------------------------------------------------------------------------------------------------|--------------------------------------------------------------------------------------|--------------------------------------------------|
| Canadian Blood Services (Canadian Blood Services) <sup>55</sup>        | 2020-05-09 to 2020-06-18 |                  | National         | Moderate             | 37737       | 17-25 (n=3581); 25-39 (n=10781); 40-59 (14147); 60+(n=9228) | 46.9       | Non-probability | Blood donors  | 0.7% (0.6-0.8%)                                      | Abbott   Abbott Architect SARS-CoV-2 IgG assay   IgG                                                                                                    | 0.4%, 1.0% (FINDDx / MUHC independent evaluation)                                    | -                                                |
| Bolotin (Public health Ontario) <sup>51</sup>                          | 2020-05-05 to 2020-05-30 | Ontario          | Regional         | High                 | 1061        | NR                                                          | NR         | Non-probability | Residual sera | 1.9%                                                 | USA; Abbott Laboratories   Abbott architect SARS-CoV-2 IgG test   IgG                                                                                   | 0.4%, 1.0% (FINDDx / MUHC independent evaluation)                                    | -                                                |
| Skowronski (British Columbia Centre for Disease Control) <sup>56</sup> | 2020-05-15 to 2020-05-27 | British Columbia | Regional         | Moderate             | 885         | Median 45 (Range <10-80+)                                   | 50.5       | Probability     | Residual sera | 0.6% (0.1-1.4%)                                      | Ortho-Clinical Diagnostics; Abbott; Siemens Healthineers   VITROS anti-SARS-CoV-2 total antibody, Abbott Architect SARS-CoV-2 IgG assay   IgG, IgA, IgM | 97.8%, 97.8% (Used Bastos SR/MA data; no sens, spec, or author adjustment available) | 0.1% (0.0-0.4%)                                  |
| Bolotin (Public health Ontario) <sup>51</sup>                          | 2020-03-27 to 2020-04-30 | Ontario          | Regional         | High                 | 827         | NR                                                          | NR         | Non-probability | Residual sera | 0.6%                                                 | USA; Abbott Laboratories   Abbott architect SARS-CoV-2 IgG test   IgG                                                                                   | 0.4%, 1.0% (FINDDx / MUHC independent evaluation)                                    | -                                                |
| Skowronski (British Columbia Centre for Disease Control) <sup>56</sup> | 2020-03-05 to 2020-03-13 | British Columbia | Regional         | Moderate             | 869         | Median 45 (Range <10-80+)                                   | 51.1       | Probability     | Residual sera | 0.3% (0.0-0.9%)                                      | Ortho-Clinical Diagnostics; Abbott   VITROS anti-SARS-CoV-2 total antibody, Abbott Architect SARS-CoV-2 IgG assay   IgG, IgA, IgM                       | 97.8%, 97.8% (Used Bastos SR/MA data; no sens, spec, or author adjustment available) | 0.1% (0.0-0.4%)                                  |
| <b>Denmark</b>                                                         |                          |                  |                  |                      |             |                                                             |            |                 |               |                                                      |                                                                                                                                                         |                                                                                      |                                                  |
| Jespersen (Aarhus)                                                     | 2020-06-17 to 2020-06-30 | Eastern Central  | Regional         | High                 | 180         | NR                                                          | NR         | Non-probability | Blood donors  | 0.6% (0.0-3.5%)                                      | Wantai Biological                                                                                                                                       | 96.7%, 99.5% (Used author-)                                                          | 0.6% (0.1-2.6%)                                  |

| Article Author (Study Organization)                                    | Sampling Dates (YMD)     | Location                       | Geographic Scope | Overall Risk of Bias | Sample Size | Age                   | Female (%) | Sampling method | Sample frame | Uncorrected Seroprevalence (95% Confidence Interval) | Test Manufacturers   Names   Isotypes                                                          | Test Sens, Spec (Source)                     | Corrected Seroprevalence (95% Credible Interval) |
|------------------------------------------------------------------------|--------------------------|--------------------------------|------------------|----------------------|-------------|-----------------------|------------|-----------------|--------------|------------------------------------------------------|------------------------------------------------------------------------------------------------|----------------------------------------------|--------------------------------------------------|
| University Hospital) <sup>61</sup>                                     |                          | Denmark Region                 |                  |                      |             |                       |            |                 |              |                                                      | Pharmacy Enterprise   Wantai SARS CoV-2 Total Antibody ELISA   IgG, IgA, IgM                   | adjusted estimate)                           |                                                  |
| Jespersen (Aarhus University Hospital) <sup>61</sup>                   | 2020-06-17 to 2020-06-30 | Western Central Denmark Region | Regional         | High                 | 180         | NR                    | NR         | Non-probability | Blood donors | 1.2% (0.0-4.4%)                                      | Wantai Biological Pharmacy Enterprise   Wantai SARS CoV-2 Total Antibody ELISA   IgG, IgA, IgM | 96.7%, 99.5% (Used author-adjusted estimate) | 1.2% (0.2-3.5%)                                  |
| Pedersen (Copenhagen University Hospital Rigshospitalet) <sup>62</sup> | 2020-06-01 to 2020-06-26 |                                | National         | Moderate             | 1110        | NR                    | NR         | Non-probability | Blood donors | 2.5% (1.3-3.8%)                                      | Beijing Wantai Biological Pharmacy Enterprise   WANTAI SARS-CoV-2 Ab ELISA   NR                | 96.7%, 99.5% (Used author-adjusted estimate) | 2.5% (1.6-3.5%)                                  |
| Pedersen (Copenhagen University Hospital Rigshospitalet) <sup>62</sup> | 2020-06-02 to 2020-06-19 |                                | National         | Moderate             | 1200        | Median 73 (IQR 71-76) | 43.0       | Probability     | Blood donors | 1.4% (0.3-2.5%)                                      | Beijing Wantai Biological Pharmacy Enterprise   WANTAI SARS-CoV-2 Ab ELISA   NR                | 96.7%, 99.5% (Used author-adjusted estimate) | 1.4% (0.8-2.1%)                                  |
| Erikstrup (Copenhagen University Hospital) <sup>65</sup>               | 2020-04-06 to 2020-05-03 |                                | National         | Moderate             | 20640       | 17-69 (n=20640)       | 50.5       | Probability     | Blood donors | 1.9% (0.8-2.3%)                                      | Livzon Diagnostics   2019-nCoV IgG/IgM Antibody Detection Kit   IgG, IgM                       | 82.6%, 99.5% (Used author-adjusted estimate) | 1.9% (1.7-2.1%)                                  |
| Iversen (University of Copenhagen) <sup>66</sup>                       | 2020-04-15 to 2020-04-22 | Capital Region of Denmark      | Regional         | High                 | 4672        | NR                    | NR         | Non-probability | Blood donors | 3.0% (2.6-3.6%)                                      | Livzon Diagnostics   NR   IgG, IgM                                                             | 73.4%, 99.9% (Used author-adjusted estimate) | 3.0% (2.6-3.6%)                                  |
| <b>Faroe Islands</b>                                                   |                          |                                |                  |                      |             |                       |            |                 |              |                                                      |                                                                                                |                                              |                                                  |

| Article Author (Study Organization)                      | Sampling Dates (YMD)     | Location                                                                                                                                                                                 | Geographic Scope | Overall Risk of Bias | Sample Size | Age                                                                                                                                | Female (%) | Sampling method | Sample frame                    | Uncorrected Seroprevalence (95% Confidence Interval) | Test Manufacturers   Names   Isotypes                                                                                                       | Test Sens, Spec (Source)                                  | Corrected Seroprevalence (95% Credible Interval) |
|----------------------------------------------------------|--------------------------|------------------------------------------------------------------------------------------------------------------------------------------------------------------------------------------|------------------|----------------------|-------------|------------------------------------------------------------------------------------------------------------------------------------|------------|-----------------|---------------------------------|------------------------------------------------------|---------------------------------------------------------------------------------------------------------------------------------------------|-----------------------------------------------------------|--------------------------------------------------|
| Petersen (University of the Faroe Islands) <sup>67</sup> | 2020-04-27 to 2020-05-01 | Faroe Islands                                                                                                                                                                            | Regional         | Low                  | 1075        | Mean 42.1 (SD 23.1)                                                                                                                | 50.0       | Probability     | Household and community samples | 0.7%                                                 | Beijing Wantai Biological Pharmacy Enterprise   Wantai SARS CoV-2 Total Antibody ELISA   IgG, IgM                                           | 94.4%, 100.0% (Used author-adjusted estimate)             | 0.7% (0.3-1.3%)                                  |
| <b>France</b>                                            |                          |                                                                                                                                                                                          |                  |                      |             |                                                                                                                                    |            |                 |                                 |                                                      |                                                                                                                                             |                                                           |                                                  |
| Carrat (Paris University) <sup>75</sup>                  | 2020-05-04 to 2020-06-23 |                                                                                                                                                                                          | National         | Moderate             | 14628       | <40 (n=2262), 40-50 (n=2897), 50-60 (n=3019), 60-70 (3272), 70+ (n=3175)                                                           | 60.3       | Probability     | Household and community samples | 6.7%                                                 | Euroimmun   ELISA-S Anti-Sars-CoV-2 IgG   IgG                                                                                               | 0.6%, 0.9% (FINDDx / MUHC independent evaluation)         | -                                                |
| Capai (Université de Corse) <sup>78</sup>                | 2020-04-16 to 2020-06-15 | Corsica   Ajaccio Corte                                                                                                                                                                  | Regional         | Moderate             | 1973        | Median 52 (IQR 34-70)                                                                                                              | 60.2       | Non-probability | Residual sera                   | 5.5% (4.5-6.6%)                                      | Bussy-Saint Martin; EUROIMMUN ; France   EUROIMMUN ELISA IgG enzyme immunoassay kit   IgG                                                   | 0.6%, 0.9% (FINDDx / MUHC independent evaluation)         | -                                                |
| Vu (Santé publique France) <sup>81</sup>                 | 2020-05-11 to 2020-05-17 | Auvergne-Rhône-Alpes, Occitanie, Martinique, Bourgogne-Franche Comté, Île-de-France, Corse, Hauts-de-France, Guadeloupe, French Guiana, Bretagne, Pays de la Loire, Centre-Val-de-Loire, | National         | Moderate             | 3592        | 0-9 (n=255); 10-19 (n=336); 20-29 (n=318); 30-39 (n=409); 40-49 (n=390); 50-59 (n=469); 60-69 (n=496); 70-79 (n=480); =>80 (n=439) | 57.0       | Non-probability | Residual sera                   | 13.0%                                                | N/A - Author Designed   Luciferase-Linked ImmunoSorbent Assay N, Luciferase-Linked ImmunoSorbent Assay S, Pseudo-neutralisation assay   IgG | 100.0%, 100.0% (Test developer / manufacturer evaluation) | 12.9% (11.5-14.4%)                               |



| Article Author (Study Organization)                               | Sampling Dates (YMD)     | Location                                                                                                                                                                    | Geographic Scope | Overall Risk of Bias | Sample Size | Age                                                                                                                                                               | Female (%) | Sampling method | Sample frame                    | Uncorrected Seroprevalence (95% Confidence Interval) | Test Manufacturers   Names   Isotypes                                                                                                       | Test Sens, Spec (Source)                                  | Corrected Seroprevalence (95% Credible Interval) |
|-------------------------------------------------------------------|--------------------------|-----------------------------------------------------------------------------------------------------------------------------------------------------------------------------|------------------|----------------------|-------------|-------------------------------------------------------------------------------------------------------------------------------------------------------------------|------------|-----------------|---------------------------------|------------------------------------------------------|---------------------------------------------------------------------------------------------------------------------------------------------|-----------------------------------------------------------|--------------------------------------------------|
|                                                                   |                          | Grand-Est, Nouvelle-Aquitaine, La Reunion, Provence-Alpes-Côte d'Azur, Normandie                                                                                            |                  |                      |             |                                                                                                                                                                   |            |                 |                                 |                                                      |                                                                                                                                             |                                                           |                                                  |
| Cohen (Centre Hospitalier Intercommunal de Créteil) <sup>82</sup> | 2020-04-14 to 2020-05-12 | Île-de-France   Paris                                                                                                                                                       | Local            | High                 | 605         | Mean 4.9 (SD 3.9)                                                                                                                                                 | 46.8       | Non-probability | Residual sera                   | 10.7% (8.4-13.5%)                                    | Biosynex   Biosynex COVID-19 BSS test   IgG, IgM                                                                                            | 91.8%, 99.2% (Test developer / manufacturer evaluation)   | 9.9% (4.6-14.2%)                                 |
| Fontanet (Institut Pasteur) <sup>84</sup>                         | 2020-04-28 to 2020-04-30 | Hauts-de-France   Crepy-en-Valois                                                                                                                                           | Local            | Moderate             | 1340        | Median NR (Pupils); 40 (parents); 47.5 (teachers); 47.5 (non-teaching staff) (IQR TR: 6-11 Pupils; 37-44 (Parents); 40-51 (Teachers); 32-54 (non-teaching staff)) | 57.4       | Non-probability | Household and community samples | 10.4%                                                | Institut Pasteur   S-Flow assay   NR                                                                                                        | 99.4%, 100.0% (Test developer / manufacturer evaluation)  | 10.0% (7.9-12.1%)                                |
| Vu (Santé publique France) <sup>81</sup>                          | 2020-04-06 to 2020-04-12 | Auvergne-Rhône-Alpes, Occitanie, Martinique, Bourgogne-Franche Comté, Île-de-France, Corse, Hauts-de-France, Pays de la Loire, Nouvelle-Aquitaine, Bretagne, French Guiana, | National         | Moderate             | 3595        | 0-9 (n=167); 10-19 (n=298); 20-29 (n=355); 30-39 (n=461); 40-49 (n=455); 50-59 (n=489); 60-69 (n=487); 70-79 (n=455); =>80 (n=428)                                | 56.7       | Non-probability | Residual sera                   | 10.7%                                                | N/A - Author Designed   Luciferase-Linked ImmunoSorbent Assay N, Luciferase-Linked ImmunoSorbent Assay S, Pseudo-neutralisation assay   IgG | 100.0%, 100.0% (Test developer / manufacturer evaluation) | 10.5% (9.1-11.9%)                                |

| Article Author (Study Organization)               | Sampling Dates (YMD)     | Location                                                                                                                                                                    | Geographic Scope | Overall Risk of Bias | Sample Size | Age                                                                                                                                                        | Female (%) | Sampling method | Sample frame  | Uncorrected Seroprevalence (95% Confidence Interval) | Test Manufacturers   Names   Isotypes                                                                                                       | Test Sens, Spec (Source)                                                             | Corrected Seroprevalence (95% Credible Interval) |
|---------------------------------------------------|--------------------------|-----------------------------------------------------------------------------------------------------------------------------------------------------------------------------|------------------|----------------------|-------------|------------------------------------------------------------------------------------------------------------------------------------------------------------|------------|-----------------|---------------|------------------------------------------------------|---------------------------------------------------------------------------------------------------------------------------------------------|--------------------------------------------------------------------------------------|--------------------------------------------------|
|                                                   |                          | Centre-Val-de-Loire, Grand-Est, Guadeloupe, La Reunion, Provence-Alpes-Côte d'Azur, Normandie                                                                               |                  |                      |             |                                                                                                                                                            |            |                 |               |                                                      |                                                                                                                                             |                                                                                      |                                                  |
| Gallian (Unite des Virus Emergents) <sup>86</sup> | 2020-03-25 to 2020-04-07 | Hauts-de-France, Provence-Alpes-Côte d'Azur, Île-de-France, Grand-Est                                                                                                       | National         | High                 | 998         | Median 41 (NR)                                                                                                                                             | 49.0       | Non-probability | Blood donors  | 2.7%                                                 | Author-designed   N/A - Author-designed   NR                                                                                                | No data                                                                              | -                                                |
| Grzelak (Institut Pasteur) <sup>87</sup>          | 2020-03-20 to 2020-03-24 | Hauts-de-France   Clermont, Lille, Noyon                                                                                                                                    | Local            | High                 | 200         | NR                                                                                                                                                         | NR         | Non-probability | Blood donors  | 0.0%                                                 | Author-designed   N/A - Author-designed   IgG, IgA, IgM                                                                                     | 75.6%, 97.6% (Used Bastos SR/MA data; no sens, spec, or author adjustment available) | 0.5% (0.0-2.0%)                                  |
| Vu (Santé publique France) <sup>81</sup>          | 2020-03-09 to 2020-03-15 | Auvergne-Rhône-Alpes, Occitanie, Martinique, Bourgogne-Franche Comté, Corse, Île-de-France, Hauts-de-France, Pays de la Loire, Nouvelle-Aquitaine, Bretagne, French Guiana, | National         | Moderate             | 3834        | 0-9 (n=359);<br>10-19 (n=420);<br>20-29 (n=420);<br>30-39 (n=500);<br>40-49 (n=487);<br>50-59 (n=461);<br>60-69 (n=455);<br>70-79 (n=382);<br>=>80 (n=347) | 55.9       | Non-probability | Residual sera | 3.8%                                                 | N/A - Author Designed   Luciferase-Linked ImmunoSorbent Assay N, Luciferase-Linked ImmunoSorbent Assay S, Pseudo-neutralisation assay   IgG | 100.0%, 100.0% (Test developer / manufacturer evaluation)                            | 3.5% (2.3-4.4%)                                  |

| Article Author (Study Organization)                         | Sampling Dates (YMD)     | Location                                                                                      | Geographic Scope | Overall Risk of Bias | Sample Size | Age    | Female (%) | Sampling method | Sample frame                    | Uncorrected Seroprevalence (95% Confidence Interval) | Test Manufacturers   Names   Isotypes                                                                                    | Test Sens, Spec (Source)                                                             | Corrected Seroprevalence (95% Credible Interval) |
|-------------------------------------------------------------|--------------------------|-----------------------------------------------------------------------------------------------|------------------|----------------------|-------------|--------|------------|-----------------|---------------------------------|------------------------------------------------------|--------------------------------------------------------------------------------------------------------------------------|--------------------------------------------------------------------------------------|--------------------------------------------------|
|                                                             |                          | Grand-Est, Centre-Val-de-Loire, Guadeloupe, La Reunion, Provence-Alpes-Côte d'Azur, Normandie |                  |                      |             |        |            |                 |                                 |                                                      |                                                                                                                          |                                                                                      |                                                  |
| <b>Germany</b>                                              |                          |                                                                                               |                  |                      |             |        |            |                 |                                 |                                                      |                                                                                                                          |                                                                                      |                                                  |
| Fuest (ifo Institute) <sup>89</sup>                         | 2020-10-26 to 2020-11-18 |                                                                                               | National         | Unclear              | 9929        | 18+    | NR         | Non-probability | Household and community samples | 1.1% (0.9-1.3%)                                      | Roche   Elecsys   NR                                                                                                     | 0.9%, 1.0% (FINDDx / MUHC independent evaluation)                                    | -                                                |
| Robert Koch Institute (Robert Koch Institute) <sup>90</sup> | 2020-04-15 to 2020-11-05 |                                                                                               | National         | Moderate             | 48976       | NR     | NR         | Probability     | Blood donors                    | 1.8%                                                 | NR   NR   IgG                                                                                                            | 75.6%, 97.6% (Used Bastos SR/MA data; no sens, spec, or author adjustment available) | 0.2% (0.0-0.5%)                                  |
| Schwarz (University of Witten) <sup>93</sup>                | 2020-06-15 to 2020-09-01 |                                                                                               | National         | High                 | 731         | NR     | NR         | Non-probability | Residual sera                   | 11.2%                                                | Cleartest IgM; Euroimmun IgA; Diasorin IgG; Euroimmun IgG; Nadal IgM; Microgen IgG; Roche IgM   Multiple   IgG, IgA, IgM | No data                                                                              | -                                                |
| Laub (University of Regensburg) <sup>97</sup>               | 2020-05-22 to 2020-07-22 | Bavaria                                                                                       | Regional         | Moderate             | 2832        | NR     | 42.7       | Non-probability | Household and community samples | 4.9%                                                 | Roche Diagnostics   Elecsys Anti-SARS-CoV-2   IgG, IgA, IgM                                                              | 0.6%, 1.0% (FINDDx / MUHC independent evaluation)                                    | -                                                |
| Aziz (University of Bonn) <sup>101</sup>                    | 2020-04-24 to 2020-06-30 | North Rhine-                                                                                  | Local            | High                 | 4771        | 30-100 | 56.9       | Non-probability | Household and                   | 1.0% (0.7-1.3%)                                      | EUROIMMUN   Euroimmun Anti-SARS-                                                                                         | 0.6%, 0.9% (FINDDx / MUHC)                                                           | -                                                |

| Article Author (Study Organization)                                                                    | Sampling Dates (YMD)     | Location                                    | Geographic Scope | Overall Risk of Bias | Sample Size | Age                                                                        | Female (%) | Sampling method | Sample frame                    | Uncorrected Seroprevalence (95% Confidence Interval) | Test Manufacturers   Names   Isotypes                                                                                                         | Test Sens, Spec (Source)                                                             | Corrected Seroprevalence (95% Credible Interval) |
|--------------------------------------------------------------------------------------------------------|--------------------------|---------------------------------------------|------------------|----------------------|-------------|----------------------------------------------------------------------------|------------|-----------------|---------------------------------|------------------------------------------------------|-----------------------------------------------------------------------------------------------------------------------------------------------|--------------------------------------------------------------------------------------|--------------------------------------------------|
|                                                                                                        |                          | Westphalia   Bonn                           |                  |                      |             |                                                                            |            |                 | community samples               |                                                      | CoV-2 ELISA IgG   IgG                                                                                                                         | independent evaluation)                                                              |                                                  |
| Aziz (University of Bonn) <sup>101</sup>                                                               | 2020-04-24 to 2020-06-30 | North Rhine-Westphalia   Bonn               | Local            | High                 | 360         | 30-100                                                                     | 60.6       | Non-probability | Household and community samples | 1.9% (0.8-4.4%)                                      | EUROIMMUN   Euroimmun Anti-SARS-CoV-2 ELISA IgG   IgG                                                                                         | 0.6%, 0.9% (FINDDx / MUHC independent evaluation)                                    | -                                                |
| Runkel (University Medical Center of The Johannes Gutenberg-University Mainz) <sup>104</sup>           | 2020-03-15 to 2020-06-15 | Southwest                                   | Regional         | High                 | 3880        | 18-29 (n=1292); 30-39 (n=772); 40-49 (n=537); 50-59 (n=797); 60-71 (n=282) | 45.3       | Non-probability | Blood donors                    | 0.9%                                                 | Abbott Laboratories   ARCHITECT Anti-SARS-CoV-2 IgG Assay   IgG                                                                               | 0.4%, 1.0% (FINDDx / MUHC independent evaluation)                                    | -                                                |
| Santos-Hovener (Robert Koch Institute) <sup>105</sup>                                                  | 2020-05-20 to 2020-06-09 | Baden-Württemberg   Kupferzell              | Local            | Low                  | 2203        | 18-34 (n= 713); 35-49 (n=533); 50-64 (n=572); =>65 (n= 385)                | 51.9       | Probability     | Household and community samples | 12.0% (10.4-14.0%)                                   | Euroimmun   SARS-CoV-2-S1 ELISA   IgG                                                                                                         | 88.3%, 99.2% (Used author-adjusted estimate)                                         | 12.0% (10.7-13.4%)                               |
| Herrmann (Internal medicine and laboratory medicine specialist practice and laboratory) <sup>107</sup> | 2020-03-26 to 2020-06-04 | North Rhine-Westphalia                      | Regional         | High                 | 415         | Mean 42 (SD 27)                                                            | NR         | Non-probability | Residual sera                   | 1.2%                                                 | Euroimmun   anti-SARS-CoV-2-ELISA-IgG   IgG                                                                                                   | 0.6%, 0.9% (FINDDx / MUHC independent evaluation)                                    | -                                                |
| Fischer (Heart and Diabetes Center NRW) <sup>108</sup>                                                 | 2020-03-09 to 2020-06-03 | Lower Saxony, North Rhine-Westphalia, Hesse | Regional         | High                 | 3186        | NR                                                                         | 70.8       | Non-probability | Residual sera                   | 0.9% (0.6-1.2%)                                      | DiaSorin; EUROIMMUN ; Abbott   Abbott Architect SARS-CoV-2 IgG assay, Euroimmun Anti-SARS-CoV-2 ELISA IgG, LIAISON SARS-CoV-2 S1/S2 IgG   IgG | 75.6%, 97.6% (Used Bastos SR/MA data; no sens, spec, or author adjustment available) | 0.1% (0.0-0.3%)                                  |
| Weis (Jena University Hospital) <sup>111</sup>                                                         | 2020-05-12 to 2020-05-22 | Thuringia                                   | Local            | Moderate             | 620         | Mean 58.1 (adults); 9.6 (children) (SD 16.5 (adults);                      | 51.3       | Probability     | Household and community samples | 8.4%                                                 | Snibe Diagnostic; EUROIMMUN ; Roche;                                                                                                          | No data                                                                              | -                                                |

| Article Author (Study Organization)                 | Sampling Dates (YMD)     | Location  | Geographic Scope | Overall Risk of Bias | Sample Size | Age                                                                                                      | Female (%) | Sampling method | Sample frame                    | Uncorrected Seroprevalence (95% Confidence Interval) | Test Manufacturers   Names   Isotypes                                                                                                                                                                                                                                                                                                                                     | Test Sens, Spec (Source) | Corrected Seroprevalence (95% Credible Interval) |
|-----------------------------------------------------|--------------------------|-----------|------------------|----------------------|-------------|----------------------------------------------------------------------------------------------------------|------------|-----------------|---------------------------------|------------------------------------------------------|---------------------------------------------------------------------------------------------------------------------------------------------------------------------------------------------------------------------------------------------------------------------------------------------------------------------------------------------------------------------------|--------------------------|--------------------------------------------------|
|                                                     |                          |           |                  |                      |             | 4.38 (children )                                                                                         |            |                 |                                 |                                                      | DiaSorin; Epitope Diagnostics; Abbott   EDI Novel Coronavirus SARS-CoV-2 IgG ELISA kit, SARS-CoV-2 IgG ELISA kit, SARS-CoV-2 S1/S2 IgG CLIA kit, 2019-nCoV IgG kit, SARS-CoV-2 IgG CMIA kit, Elecsys Anti-SARS-CoV-2 kit   IgG                                                                                                                                            |                          |                                                  |
| Weis (Friedrich Schiller University) <sup>113</sup> | 2020-05-13 to 2020-05-16 | Thuringia | Sublocal         | Moderate             | 620         | Mean 58.1 (adults); 9.62 (children and adolescents) (SD 16.5 (adults); 4.38 (children and adolescents) ) | 51.3       | Non-probability | Household and community samples | 8.4%                                                 | USA Euroimmun; Lübeck; USA Roche; Italy Snibe Co.; Ltd.; Basel Switzerland; China Abbott; Shenzhen; Saluggia; Germany DiaSorin; Epitope Diagnostics Inc.; San Diego; Chicago   EDI Novel Coronavirus SARS-CoV-2 IgG ELISA kit, SARS-CoV-2 IgG ELISA kit, SARS-CoV-2 S1/S2 IgG CLIA kit, 2019-nCoV IgG kit, SARS-CoV-2 IgG CMIA kit and Elecsys Anti-SARS-CoV-2 kit.   IgG | No data                  | -                                                |

| Article Author (Study Organization)                    | Sampling Dates (YMD)     | Location                                                                                                    | Geographic Scope | Overall Risk of Bias | Sample Size | Age                                                          | Female (%) | Sampling method | Sample frame                    | Uncorrected Seroprevalence (95% Confidence Interval) | Test Manufacturers   Names   Isotypes                                                                                                      | Test Sens, Spec (Source)                                        | Corrected Seroprevalence (95% Credible Interval) |
|--------------------------------------------------------|--------------------------|-------------------------------------------------------------------------------------------------------------|------------------|----------------------|-------------|--------------------------------------------------------------|------------|-----------------|---------------------------------|------------------------------------------------------|--------------------------------------------------------------------------------------------------------------------------------------------|-----------------------------------------------------------------|--------------------------------------------------|
| Reisinger (Universitätsmedizin Rostock) <sup>118</sup> | 2020-04-20 to 2020-04-22 | Mecklenburg-Westpomerania   Rostock                                                                         | Sublocal         | High                 | 401         | Mean 36.9 (NR)                                               | 100.0      | Non-probability | Household and community samples | 3.0%                                                 | EUROIMMUN   Euroimmun Anti-SARS-CoV-2 IgG IgA ELISA   IgG, IgA                                                                             | 0.9%, 0.8% (FINDDx / MUHC independent evaluation)               | -                                                |
| Streeck (University of Bonn) <sup>125</sup>            | 2021-03-31 to 2020-04-06 | Heinsberg   Gangelt                                                                                         | Local            | Low                  | 919         | Median 53 (Range 1-90)                                       | 50.8       | Probability     | Household and community samples | 14.1% (11.2-17.3%)                                   | EUROIMMUN   Euroimmun Anti-SARS-CoV-2 ELISA IgG   IgG                                                                                      | 90.9%, 99.1% (Used author-adjusted estimate)                    | 14.1% (11.9-16.4%)                               |
| <b>Greece</b>                                          |                          |                                                                                                             |                  |                      |             |                                                              |            |                 |                                 |                                                      |                                                                                                                                            |                                                                 |                                                  |
| Bogogiannidou (University of Thessaly) <sup>129</sup>  | 2020-03-01 to 2020-04-30 | Epirus, Western Macedonia, Thessaly, Central Macedonia, Attica, Peloponnese, Western Greece, Central Greece | National         | Moderate             | 6586        | 0-29 (n=1464); 30-49 (n=2066); 50-69 (n=1762); >=70 (n=1294) | 55.0       | Non-probability | Residual sera                   | 0.4%                                                 | Abbott   Abbott Architect SARS-CoV-2 IgG assay   IgG                                                                                       | 0.4%, 1.0% (FINDDx / MUHC independent evaluation)               | -                                                |
| <b>Iceland</b>                                         |                          |                                                                                                             |                  |                      |             |                                                              |            |                 |                                 |                                                      |                                                                                                                                            |                                                                 |                                                  |
| Gudbjartsson (deCODE Genetics) <sup>130</sup>          | 2020-04-27 to 2020-06-12 |                                                                                                             | National         | Moderate             | 23452       | Mean 56 (SD 20)                                              | NR         | Non-probability | Household and community samples | 0.3%                                                 | Wantai/Nordic BioSite; Roche International   Roche Elecsys chemiluminescence assay, Wantai SARS CoV-2 Total Antibody ELISA   IgG, IgA, IgM | 91.1%, 99.8% (Test developer / manufacturer evaluation)         | 0.1% (0.0-0.3%)                                  |
| <b>Ireland</b>                                         |                          |                                                                                                             |                  |                      |             |                                                              |            |                 |                                 |                                                      |                                                                                                                                            |                                                                 |                                                  |
| Igoe (HSE Health Protection Surveillance)              | 2020-06-22 to 2020-07-16 | Leinster, Connaught   Dublin, Sligo                                                                         | National         | Moderate             | 1733        | 12-19 (n=3); 20-29 (n=7); 30-39 (n=5); 40-49 (n=7);          | NR         | Probability     | Household and community samples | 1.7% (1.1-2.4%)                                      | FORTRESS; Abbott   Abbott Architect SARS-CoV-2 IgG assay,                                                                                  | 97.8%, 97.8% (Used Bastos SR/MA data; no sens, spec, or author) | 0.2% (0.0-0.6%)                                  |

| Article Author (Study Organization)                                    | Sampling Dates (YMD)     | Location                                                                                                                                                                                                                  | Geographic Scope | Overall Risk of Bias | Sample Size | Age                                                                        | Female (%) | Sampling method | Sample frame                    | Uncorrected Seroprevalence (95% Confidence Interval) | Test Manufacturers   Isotypes                                | Test Sens, Spec (Source)                                       | Corrected Seroprevalence (95% Credible Interval) |
|------------------------------------------------------------------------|--------------------------|---------------------------------------------------------------------------------------------------------------------------------------------------------------------------------------------------------------------------|------------------|----------------------|-------------|----------------------------------------------------------------------------|------------|-----------------|---------------------------------|------------------------------------------------------|--------------------------------------------------------------|----------------------------------------------------------------|--------------------------------------------------|
| Centre (HPSC) ) <sup>131</sup>                                         |                          |                                                                                                                                                                                                                           |                  |                      |             | 50-59 (n=5);<br>60-69 (n=6)                                                |            |                 |                                 |                                                      | FORTRESS (Wantai)-2 Assay   IgG                              | adjustment available                                           |                                                  |
| <b>Israel</b>                                                          |                          |                                                                                                                                                                                                                           |                  |                      |             |                                                                            |            |                 |                                 |                                                      |                                                              |                                                                |                                                  |
| Rabinowitz (The Central Bureau of Statistics ) <sup>132</sup>          | 2020-06-15 to 2020-08-15 | Bnei Brak                                                                                                                                                                                                                 | Local            | Moderate             | 3500        | NR                                                                         | NR         | Probability     | Household and community samples | 14.6%                                                | NR   NR   NR                                                 | No data                                                        | -                                                |
| Efrati (Israeli Pandemic Task Force) <sup>133</sup>                    | Until 2020-06-02         | Israel                                                                                                                                                                                                                    | National         | Moderate             | 1700        | NR                                                                         | NR         | Probability     | Household and community samples | 2.5%                                                 | NR   NR   IgG                                                | No data                                                        | -                                                |
| <b>Italy</b>                                                           |                          |                                                                                                                                                                                                                           |                  |                      |             |                                                                            |            |                 |                                 |                                                      |                                                              |                                                                |                                                  |
| Italian Ministry of Health (Italian Ministry of Health) <sup>137</sup> | 2020-05-25 to 2020-07-15 | Molise, Campania, Friuli-Venezia Giulia, Abruzzo, Lazio, Liguria, Basilicata, Lombardy, Piemonte, Umbria, Sicily, Calabria, Sardegna, Valle D'Aosta, Veneto, Emilia Romagna, Puglia, Trentino-Alto Adige, Marche, Tuscany | National         | Unclear              | 64660       | NR                                                                         | NR         | Non-probability | Household and community samples | 2.5%                                                 | Abbott   Abbott Architect SARS-CoV-2 IgG assay   IgG         | 0.4%, 1.0% (FINDDx / MUHC independent evaluation)              | -                                                |
| Cento (Universita degli Studi di Milano) <sup>139</sup>                | 2020-05-11 to 2020-07-05 | Lombardy   Milan                                                                                                                                                                                                          | Sublocal         | Moderate             | 2753        | =<10 (n=8);<br>11-24 (n=132);<br>25-49 years (n=786); 50-64 (n=545); 65-84 | 49.5       | Non-probability | Residual sera                   | 3.3%                                                 | Abbott Park; Abbott; Saluggia; Italy; Illinois; US; DiaSorin | 97.8%, 97.8% (Used Bastos SR/MA data; no sens, spec, or author | 1.2% (0.2-2.1%)                                  |

| Article Author (Study Organization)                                    | Sampling Dates (YMD)     | Location                      | Geographic Scope | Overall Risk of Bias | Sample Size | Age                                                                                                                         | Female (%) | Sampling method | Sample frame                    | Uncorrected Seroprevalence (95% Confidence Interval) | Test Manufacturers   Names   Isotypes                                                     | Test Sens, Spec (Source)                                                             | Corrected Seroprevalence (95% Credible Interval) |
|------------------------------------------------------------------------|--------------------------|-------------------------------|------------------|----------------------|-------------|-----------------------------------------------------------------------------------------------------------------------------|------------|-----------------|---------------------------------|------------------------------------------------------|-------------------------------------------------------------------------------------------|--------------------------------------------------------------------------------------|--------------------------------------------------|
|                                                                        |                          |                               |                  |                      |             | (n=984); =>85 (n=316)                                                                                                       |            |                 |                                 |                                                      | S.p.A.   Abbott ARCHITECT SARS-CoV-2 IgG assay; LIAISON1 SARS-CoV-2 S1/S2 IgG assay   IgG | adjustment available)                                                                |                                                  |
| Berte (University of Cagliari) <sup>141</sup>                          | 2020-04-15 to 2020-06-15 | Lombardy   Milan              | Local            | High                 | 129         | Median 45 (IQR 35-60)                                                                                                       | 34.9       | Non-probability | Household and community samples | 7.0% (4.4-9.6%)                                      | University of Cagliari   N/A - Author Designed   IgG, IgA                                 | 97.6%, 95.2% (Test developer / manufacturer evaluation)                              | 3.3% (0.0-8.5%)                                  |
| Pagani (University of Milan) <sup>143</sup>                            | 2020-05-18 to 2020-06-07 | Lombardy   Castiglione D'Adda | Local            | Moderate             | 509         | Median 46 (IgG negative); 55.4 (IgG positive) (SD 20.6 (IgG negative); 19.5 (IgG positive))                                 | 48.9       | Probability     | Household and community samples | 22.6% (17.2-29.1%)                                   | Abbott   IgG Anti-SARS-CoV-2 CLIA   IgG                                                   | 0.4%, 1.0% (FINDDx / MUHC independent evaluation)                                    | -                                                |
| Amante (Bergamo Health Agency) <sup>145</sup>                          | 2020-04-23 to 2020-06-03 | Lombardy                      | Regional         | Moderate             | 9965        | NR                                                                                                                          | NR         | Probability     | Household and community samples | 57.0%                                                | NR   NR   NR                                                                              | No data                                                                              | -                                                |
| Fiore (University of Foggia) <sup>149</sup>                            | 2020-05-01 to 2020-05-31 | Apulia   Foggia               | Local            | High                 | 904         | 18 to 25 (n=112, 12.4%), 26 to 35 (n=195, 21.6%), 36 to 45 (n=202, 22.3%), 46 to 55 (n=149, 27.2%), 56 to 65 (n=149, 16.5%) | 26.4       | Non-probability | Blood donors                    | 1.0%                                                 | "New Industries Biomedical Engineering Co.; Ltd"   NR   IgG, IgM                          | 97.8%, 97.8% (Used Bastos SR/MA data; no sens, spec, or author adjustment available) | 0.1% (0.0-0.5%)                                  |
| Alessi (ASL Vercelli) <sup>154</sup>                                   | 2020-05-23 to 2020-05-24 | Piedmont   Borgosesia         | Local            | High                 | 4987        | Mean 55 years (Range 18-97)                                                                                                 | 54.2       | Non-probability | Household and community samples | 4.9% (4.3-5.5%)                                      | Prima Lab SA   COVID-19 IgG/IgM Rapid Test Cassette   IgG, IgM                            | 0.8%, 0.9% (FINDDx / MUHC independent evaluation)                                    | -                                                |
| Stefanelli (Azienda Provinciale per i Servizi Sanitari) <sup>161</sup> | 2020-05-05 to 2020-05-15 | Trento                        | Regional         | Low                  | 6075        | Median 50 (Range 10-98)                                                                                                     | 51.3       | Probability     | Household and community samples | 25.7%                                                | Abbott Laboratories   Abbott SARS-CoV-2 IgG assay   IgG                                   | 90.0%, 100.0% (Used author-adjusted estimate)                                        | 25.7% (24.6-26.8%)                               |



| Article Author (Study Organization)                                                               | Sampling Dates (YMD)     | Location                  | Geographic Scope | Overall Risk of Bias | Sample Size | Age                                                                     | Female (%) | Sampling method | Sample frame                    | Uncorrected Seroprevalence (95% Confidence Interval) | Test Manufacturers   Names   Isotypes                                                                                                                                                            | Test Sens, Spec (Source)                          | Corrected Seroprevalence (95% Credible Interval) |
|---------------------------------------------------------------------------------------------------|--------------------------|---------------------------|------------------|----------------------|-------------|-------------------------------------------------------------------------|------------|-----------------|---------------------------------|------------------------------------------------------|--------------------------------------------------------------------------------------------------------------------------------------------------------------------------------------------------|---------------------------------------------------|--------------------------------------------------|
| Guerrero (Istituto di Ricovero e Cura A Carattere) <sup>163</sup>                                 | 2020-04-25 to 2020-05-08 | Veneto   Verona           | Local            | Moderate             | 1515        | Mean 52.1 (SD 20)                                                       | 53.9       | Probability     | Household and community samples | 2.7%                                                 | Abbott Laboratories   Abbott test   IgG                                                                                                                                                          | 0.4%, 1.0% (FINDDx / MUHC independent evaluation) | -                                                |
| Baracco (A.S.S.T.Lodi) <sup>164</sup>                                                             | 2020-04-23 to 2020-05-05 | Lombardy region   Lodi    | Local            | Moderate             | 1792        | Mean 44 (SD 16.0)                                                       | 64.7       | Probability     | Household and community samples | 29.8%                                                | DiaSorin   The Liaison® DiaSorin® SARS-CoV-2 S1/S2 IgG test   IgG                                                                                                                                | 0.8%, 1.0% (FINDDx / MUHC independent evaluation) | -                                                |
| Vena (University of Genoa) <sup>167</sup>                                                         | 2020-03-01 to 2020-04-30 | Lombardy , Liguria        | Regional         | High                 | 3609        | Median 51 (IQR 41-63)                                                   | 55.6       | Non-probability | Residual sera                   | 11.0% (10.0-12.1%)                                   | Biosynex; Realy-Tech; Maglumi   MAGLUMI80 0TM 2019-nCoV IgG (Cat. Ref. 130219015M) and IgM (130219016M), Realy-Tech 2019 nCoV/COVID-19 IgG/IgM Rapid Test, Biosynex COVID-19 BSS test   IgG, IgM | No data                                           | -                                                |
| Landro (ATS Bergamo) <sup>170</sup>                                                               | 2020-04-23 to 2020-04-28 | Lombardy   Nembro, Alzano | Local            | Unclear              | 750         | NR                                                                      | NR         | Non-probability | Household and community samples | 61.0%                                                | NR   NR   NR                                                                                                                                                                                     | No data                                           | -                                                |
| Loconsole (Policlinico Hospital) <sup>173</sup>                                                   | 2020-03-23 to 2020-04-21 | Apulia   Bari             | Local            | High                 | 819         | Median 66 (IQR 52-80)                                                   | 44.6       | Non-probability | Residual sera                   | 8.6%                                                 | VivaChek Biotech   VivaDiag COVID-19 IgM/IgG Rapid Test   IgG, IgM                                                                                                                               | 0.8%, 0.7% (FINDDx / MUHC independent evaluation) | -                                                |
| Cito (Istituto Zooprofilattico Sperimentale dell'Abruzzo e del Molise G. Caporale) <sup>174</sup> | 2020-04-18 to 2020-04-19 | Abruzzo   Villa Caldari   | Local            | Moderate             | 667         | Mean 58.6 (seropositive); 47.3 (seronegative) (IQR 28.5 (seropositive); | 50.2       | Probability     | Household and community samples | 10.9% (8.8-13.5%)                                    | China; Beijing; Beijing Wantai Biological Pharmacy Enterprise Co.   WANTAI SARS-CoV-2                                                                                                            | 1.0%, 1.0% (FINDDx / MUHC independent evaluation) | -                                                |

| Article Author (Study Organization)                                      | Sampling Dates (YMD)     | Location         | Geographic Scope | Overall Risk of Bias | Sample Size | Age                                                                                                                                                              | Female (%) | Sampling method | Sample frame                    | Uncorrected Seroprevalence (95% Confidence Interval) | Test Manufacturers   Names   Isotypes                                                                                                                                         | Test Sens, Spec (Source)                                                             | Corrected Seroprevalence (95% Credible Interval) |
|--------------------------------------------------------------------------|--------------------------|------------------|------------------|----------------------|-------------|------------------------------------------------------------------------------------------------------------------------------------------------------------------|------------|-----------------|---------------------------------|------------------------------------------------------|-------------------------------------------------------------------------------------------------------------------------------------------------------------------------------|--------------------------------------------------------------------------------------|--------------------------------------------------|
|                                                                          |                          |                  |                  |                      |             | 28.1 (seronegative))                                                                                                                                             |            |                 |                                 |                                                      | Total Ab ELISA   NR                                                                                                                                                           |                                                                                      |                                                  |
| Valenti ( Fondazione IRCCS Ca' Granda Ospedale Maggiore ) <sup>179</sup> | 2020-02-24 to 2020-04-08 | Lombardy   Milan | Local            | High                 | 789         | Mean 42.6 (SARS-CoV-2 antibodies present); 40.7 (SARS-CoV-2 antibodies absent); (SD 13.4 (SARS-CoV-2 antibodies present); 13.2 (SARS-CoV-2 antibodies absent); ) | 35.0       | Non-probability | Blood donors                    | 5.1%                                                 | Prima Lab   PRIMA COVID-19 IgG/IgM Rapid Test   IgG, IgM                                                                                                                      | 0.8%, 0.9% (FINDDx / MUHC independent evaluation)                                    | -                                                |
| Percivalle (IRCCS Policlinico San Matteo) <sup>180</sup>                 | 2020-03-18 to 2020-04-06 | Lombardy   Lodi  | Local            | High                 | 390         | Median 46 (Range 19-70)                                                                                                                                          | 30.3       | Non-probability | Blood donors                    | 23.3%                                                | Author-designed   N/A - Author-designed   NR                                                                                                                                  | 95.0%, 100.0% (Test developer / manufacturer evaluation)                             | 22.7% (15.0-30.6%)                               |
| Milani (University of Milan) <sup>182</sup>                              | 2020-03-30 to 2020-03-31 | Lombardy   Milan | Local            | High                 | 197         | NR                                                                                                                                                               | NR         | Non-probability | Household and community samples | 10.2%                                                | EUROIMMUN ; Beijing Wantai Biological Pharmacy Enterprise   Wantai SARS-CoV-2 Ab ELISA, Euroimmun Anti-SARS-CoV-2 ELISA IgG, Wantai Anti-SARS-CoV-2 IgM ELISA   IgG, IgA, IgM | 75.6%, 97.6% (Used Bastos SR/MA data; no sens, spec, or author adjustment available) | 10.1% (4.8-16.0%)                                |
| Pancrazzi (Ospedale San Donato) <sup>183</sup>                           | 2020-03-17 to 2020-03-21 | Tuscany   Arezzo | Local            | High                 | 516         | Mean 53.7 years (NR)                                                                                                                                             | 54.5       | Non-probability | Residual sera                   | 13.0%                                                | Acro Biotech Inc.   Acro Biotech COVID-19 Rapid Test   IgG, IgM                                                                                                               | 0.4%, 0.9% (FINDDx / MUHC independent evaluation)                                    | -                                                |
| <b>Japan</b>                                                             |                          |                  |                  |                      |             |                                                                                                                                                                  |            |                 |                                 |                                                      |                                                                                                                                                                               |                                                                                      |                                                  |

| Article Author (Study Organization)                            | Sampling Dates (YMD)     | Location                                                 | Geographic Scope | Overall Risk of Bias | Sample Size | Age                                                                                                                                          | Female (%) | Sampling method | Sample frame                    | Uncorrected Seroprevalence (95% Confidence Interval) | Test Manufacturers   Names   Isotypes                                      | Test Sens, Spec (Source)                                                             | Corrected Seroprevalence (95% Credible Interval) |
|----------------------------------------------------------------|--------------------------|----------------------------------------------------------|------------------|----------------------|-------------|----------------------------------------------------------------------------------------------------------------------------------------------|------------|-----------------|---------------------------------|------------------------------------------------------|----------------------------------------------------------------------------|--------------------------------------------------------------------------------------|--------------------------------------------------|
| Nawa (Tokyo Medical and Dental University) <sup>190</sup>      | 2020-06-14 to 2020-07-05 | Kantō   Utsunomiya City                                  | Local            | Moderate             | 742         | <10 (n=56); 10-17 (n=42); 18-65 (n=463); >65 (n=181)                                                                                         | 52.6       | Probability     | Household and community samples | 1.2% (0.2-1.2%)                                      | Shenzhen YHLO Biotech Co   NR   IgG                                        | 0.7%, 1.0% (FINDDx / MUHC independent evaluation)                                    | -                                                |
| Okuda (Health and Welfare Department) <sup>191</sup>           | 2020-06-15 to 2020-06-28 | prefecture 3                                             | Regional         | Unclear              | 3000        | NR                                                                                                                                           | NR         | Non-probability | Residual sera                   | 0.0%                                                 | NR   NR   IgG                                                              | No data                                                                              | -                                                |
| Takita (Navitas Clinic Tachikawa) <sup>197</sup>               | 2020-04-20 to 2020-05-20 | Kantō, Chūbu   Yamanashi, Chiba, Kangawa, Saitama, Tokyo | Local            | High                 | 1071        | <=17 (n=13); 18-34 (n=134); 35-54 (n=653); >=55 (n=271)                                                                                      | 46.2       | Non-probability | Household and community samples | 3.8% (2.8-5.2%)                                      | Kurabo Industries   SARS-CoV-2 Antibody Testing Kit IgG (RC - NC002)   IgG | 76.4%, 100.0% (Test developer / manufacturer evaluation)                             | 4.3% (0.2-6.9%)                                  |
| Doi (Kobe City Medical Center General Hospital) <sup>200</sup> | 2020-03-31 to 2020-04-07 | Hyogo Prefecture   Kobe                                  | Local            | High                 | 1000        | 0-10 (n=81); 0-19 (n=27); 20-29 (n=36); 30-39 (n=90); 40-49 (n=155); 50-59 (n=164); 60-69 (n=171); 70-79 (n=166); 80-89 (n=164); >=90 (n=19) | 51.1       | Probability     | Residual sera                   | 2.7% (1.8-3.9%)                                      | Kurabo Industries   SARS-CoV-2 Antibody Testing Kit IgG (RC - NC002)   IgG | 76.4%, 100.0% (Test developer / manufacturer evaluation)                             | 2.8% (0.0-4.8%)                                  |
| <b>Luxembourg</b>                                              |                          |                                                          |                  |                      |             |                                                                                                                                              |            |                 |                                 |                                                      |                                                                            |                                                                                      |                                                  |
| Snoeck (Luxembourg Institute of Health) <sup>203</sup>         | 2020-04-15 to 2020-05-05 |                                                          | National         | Moderate             | 1820        | Mean 47 (SD 15)                                                                                                                              | 52.1       | Probability     | Household and community samples | 2.1% (1.4-2.8%)                                      | EUROIMMUN   Euroimmun Anti-SARS-CoV-2 ELISA IgG   IgG                      | 0.8%, 1.0% (FINDDx / MUHC independent evaluation)                                    | -                                                |
| <b>Monaco</b>                                                  |                          |                                                          |                  |                      |             |                                                                                                                                              |            |                 |                                 |                                                      |                                                                            |                                                                                      |                                                  |
| Binacchi (Principality of Monaco) <sup>204</sup>               | 2020-05-26 to 2020-06-16 |                                                          | National         | Unclear              | 35000       | NR                                                                                                                                           | NR         | Non-probability | Household and community samples | 2.8%                                                 | NR   NR   NR                                                               | 66.0%, 96.6% (Used Bastos SR/MA data; no sens, spec, or author adjustment available) | 0.1% (0.0-0.5%)                                  |
| <b>Netherlands</b>                                             |                          |                                                          |                  |                      |             |                                                                                                                                              |            |                 |                                 |                                                      |                                                                            |                                                                                      |                                                  |

| Article Author (Study Organization)                        | Sampling Dates (YMD)     | Location  | Geographic Scope | Overall Risk of Bias | Sample Size | Age                                                                                                                              | Female (%) | Sampling method | Sample frame                    | Uncorrected Seroprevalence (95% Confidence Interval) | Test Manufacturers   Names   Isotypes                                                          | Test Sens, Spec (Source)                          | Corrected Seroprevalence (95% Credible Interval) |
|------------------------------------------------------------|--------------------------|-----------|------------------|----------------------|-------------|----------------------------------------------------------------------------------------------------------------------------------|------------|-----------------|---------------------------------|------------------------------------------------------|------------------------------------------------------------------------------------------------|---------------------------------------------------|--------------------------------------------------|
| Vos (Centre for Infectious Disease Control) <sup>205</sup> | 2020-03-31 to 2020-05-11 |           | National         | Low                  | 570         | 2-17 (n = 93) ; 18-39 (n =196) ; 40-64 ( n=198) ; 65-90 (n = 83)                                                                 | 40.9       | Probability     | Household and community samples | 2.9% (1.4-6.3%)                                      | NR   fluorescent bead-based multiplex-immunoassay   IgG                                        | 84.4%, 99.0% (Used author-adjusted estimate)      | 2.9% (1.7-4.4%)                                  |
| Vos (Centre for Infectious Disease Control) <sup>205</sup> | 2020-03-31 to 2020-05-11 |           | National         | Low                  | 2637        | 2-17 (n = 507) ; 18-39 (n = 735) ; 40-64 ( n=919) ; 65-90 (n = 476)                                                              | 55.1       | Probability     | Household and community samples | 2.8% (2.1-3.7%)                                      | NR   fluorescent bead-based multiplex-immunoassay   IgG                                        | 84.4%, 99.0% (Used author-adjusted estimate)      | 2.8% (2.2-3.4%)                                  |
| Slot (Amsterdam UMC) <sup>206</sup>                        | 2020-04-01 to 2020-04-15 |           | National         | Moderate             | 7361        | 18-30 (n=1251); 31-40 (n=882); 41-50 (n=1354); 51-60 (n=2132); 60-72 (n=1742)                                                    | 47.8       | Non-probability | Blood donors                    | 3.4%                                                 | Wantai Biological Pharmacy Enterprise   Wantai SARS CoV-2 Total Antibody ELISA   IgG, IgA, IgM | 0.7%, 1.0% (FINDDx / MUHC independent evaluation) | -                                                |
| Westerhuis (Erasmus Medical Centre) <sup>207</sup>         | 2020-04-03 to 2020-04-07 | Rotterdam | Sublocal         | High                 | 729         | 6-12 months (n=17); 1-2 (n=14); 2-5 (n=24); 5-10 (n=34); 10-20 (n=139); 20-40 (n=140); 40-60 (n=140); 60-80 (n=139); 80+ (n=82)  | NR         | Non-probability | Residual sera                   | 2.3%                                                 | Author-designed   N/A - Author-designed   IgG                                                  | No data                                           | -                                                |
| Westerhuis (Erasmus Medical Centre) <sup>207</sup>         | 2020-03-02 to 2020-03-06 | Rotterdam | Sublocal         | High                 | 879         | 6-12 months (n=41); 1-2 (n=75); 2-5 (n=42); 5-10 (n=96); 10-20 (n=131); 20-40 (n=131); 40-60 (n=134); 60-80 (n=124); 80+ (n=105) | NR         | Non-probability | Residual sera                   | 0.1%                                                 | Author-designed   N/A - Author-designed   IgG                                                  | No data                                           | -                                                |
| <b>Norway</b>                                              |                          |           |                  |                      |             |                                                                                                                                  |            |                 |                                 |                                                      |                                                                                                |                                                   |                                                  |
| Tunheim (Norwegian Institute of                            | 2020-04-20 to 2020-05-17 |           | National         | Moderate             | 900         | 0-4 (n=41); 5-14 (n=115);15-24 (n=166); 25-                                                                                      | 56.6       | Non-probability | Residual sera                   | 1.1% (0.5-2.0%)                                      | Oslo University Hospital"; " Department of                                                     | 86.0%, 100.0% (Test developer                     | 0.8% (0.0-1.8%)                                  |

| Article Author (Study Organization)                                        | Sampling Dates (YMD)        | Location                                                                                                       | Geographic Scope | Overall Risk of Bias | Sample Size | Age                                                                                                  | Female (%) | Sampling method | Sample frame                    | Uncorrected Seroprevalence (95% Confidence Interval) | Test Manufacturers   Names   Isotypes                                                                                                   | Test Sens, Spec (Source)                                | Corrected Seroprevalence (95% Credible Interval) |
|----------------------------------------------------------------------------|-----------------------------|----------------------------------------------------------------------------------------------------------------|------------------|----------------------|-------------|------------------------------------------------------------------------------------------------------|------------|-----------------|---------------------------------|------------------------------------------------------|-----------------------------------------------------------------------------------------------------------------------------------------|---------------------------------------------------------|--------------------------------------------------|
| Public Health) <sup>209</sup>                                              |                             |                                                                                                                |                  |                      |             | 59 (n=372);<br>≥60 (n=206)                                                                           |            |                 |                                 |                                                      | Immunology  <br>N/A - Author-<br>designed   IgG                                                                                         | / manufacturer<br>evaluation)                           |                                                  |
| <b>Portugal</b>                                                            |                             |                                                                                                                |                  |                      |             |                                                                                                      |            |                 |                                 |                                                      |                                                                                                                                         |                                                         |                                                  |
| Kislaya ( Instituto Nacional de Saúde Doutor Ricardo Jorge) <sup>215</sup> | 2020-05-21 to<br>2020-07-08 | Alentejo Region,<br>Centro Region,<br>Algarve Region,<br>Madeira,<br>Lisboa Region,<br>Norte Region,<br>Azores | National         | Moderate             | 2301        | 1-9 (n = 404)<br>10-19 (n = 377)<br>20-39 (n = 377)<br>40-59 (n = 479)<br>>= 60 (n = 664)            | 54.1       | Non-probability | Residual sera                   | 2.9% (2.0-4.2%)                                      | 1) Wantai 2) EUROIMMUN   1) Wantai SARS-CoV-2 enzyme- linked immunosorbent assay (ELISA), 2) EUROIMMUN anti-SARS-CoV-2 assay   IgG, IgM | 96.0%, 98.7% (Test developer / manufacturer evaluation) | 1.1% (0.0-2.6%)                                  |
| <b>Republic of Korea</b>                                                   |                             |                                                                                                                |                  |                      |             |                                                                                                      |            |                 |                                 |                                                      |                                                                                                                                         |                                                         |                                                  |
| KBS World (Korea Disease Control and Prevention Agency) <sup>217</sup>     | 2020-08-15 to<br>2020-10-15 |                                                                                                                | National         | Unclear              | 1379        | NR                                                                                                   | NR         | Non-probability | Household and community samples | 0.2%                                                 | NR   NR   NR                                                                                                                            | No data                                                 | -                                                |
| Ji-Ho (Korea Centers for Disease Control and Prevention) <sup>218</sup>    | Until 2020-07-09            | Korea                                                                                                          | National         | Unclear              | 3055        | NR                                                                                                   | NR         | Non-probability | Household and community samples | 0.0%                                                 | NR   NR   NR                                                                                                                            | No data                                                 | -                                                |
| Noh (Korea University) <sup>220</sup>                                      | 2020-05-25 to<br>2020-05-29 | Seoul                                                                                                          | Local            | Moderate             | 1500        | 0-19 (n=226);<br>20-29 (n=258);<br>30-39 (n=261);<br>40-49 (n=254);<br>50-59 (n=255);<br>>60 (n=246) | 51.3       | Non-probability | Residual sera                   | 0.1%                                                 | Roche elecsys   Elecsys Anti-SARS-CoV-2 kit   NR                                                                                        | 0.9%, 1.0% (FINDDx / MUHC independent evaluation)       | -                                                |
| <b>Singapore</b>                                                           |                             |                                                                                                                |                  |                      |             |                                                                                                      |            |                 |                                 |                                                      |                                                                                                                                         |                                                         |                                                  |
| Kurohi (Singapore National Centre for Infectious Diseases) <sup>222</sup>  | 2020-02-15 to<br>2020-04-15 | Singapore                                                                                                      | Local            | Unclear              | 774         | NR                                                                                                   | NR         | Non-probability | Household and community samples | 0.0%                                                 | NR   NR   NR                                                                                                                            | No data                                                 | -                                                |

| Article Author (Study Organization)                             | Sampling Dates (YMD)     | Location                                                       | Geographic Scope | Overall Risk of Bias | Sample Size | Age                                                                              | Female (%) | Sampling method | Sample frame                    | Uncorrected Seroprevalence (95% Confidence Interval) | Test Manufacturers   Names   Isotypes                                                   | Test Sens, Spec (Source)                                                             | Corrected Seroprevalence (95% Credible Interval) |
|-----------------------------------------------------------------|--------------------------|----------------------------------------------------------------|------------------|----------------------|-------------|----------------------------------------------------------------------------------|------------|-----------------|---------------------------------|------------------------------------------------------|-----------------------------------------------------------------------------------------|--------------------------------------------------------------------------------------|--------------------------------------------------|
| <b>Spain</b>                                                    |                          |                                                                |                  |                      |             |                                                                                  |            |                 |                                 |                                                      |                                                                                         |                                                                                      |                                                  |
| Flores (Municipality of Torrejon de Ardoz) <sup>230</sup>       | 2020-05-29 to 2020-06-03 | Torrejon de Ardoz                                              | Local            | Moderate             | 104299      | >=1                                                                              | NR         | Probability     | Household and community samples | 23.1%                                                | NR   NR   IgG, IgM                                                                      | No data                                                                              | -                                                |
| Pollán (Institute of Health Carlos III) <sup>236</sup>          | 2020-04-27 to 2020-05-11 |                                                                | National         | Low                  | 51958       | 0–19 (n=11422); 20–34 (n=8469); 35–49 (n=14532); 50–64 (n=15094); >=65 (n=11558) | 61.1       | Probability     | Household and community samples | 4.6% (4.3–5.0%)                                      | Abbott   Abbott Architect SARS-CoV-2 IgG assay   IgG                                    | 0.4%, 1.0% (FINDDx / MUHC independent evaluation)                                    | -                                                |
| Montenegro (Sardenya Primary Health Care Center) <sup>243</sup> | 2020-04-21 to 2020-04-24 | Catalonia   Barcelona                                          | Local            | High                 | 311         | Mean 43.7 (SD 21.79)                                                             | 55.0       | Probability     | Household and community samples | 5.5% (3.4–8.6%)                                      | Lysine and Sure Screen; Livzlon   Livzlon, Lysine, Sure Screen   IgG, IgM               | 66.0%, 96.6% (Used Bastos SR/MA data; no sens, spec, or author adjustment available) | 3.6% (0.0–7.5%)                                  |
| <b>Sweden</b>                                                   |                          |                                                                |                  |                      |             |                                                                                  |            |                 |                                 |                                                      |                                                                                         |                                                                                      |                                                  |
| The Local (Werlabs) <sup>250</sup>                              | 2020-07-01 to 2020-07-22 | Uppland, Skåne, Västra Götaland   Gothenburg, Stockholm, Malmo | Local            | High                 | 83000       | NR                                                                               | NR         | Non-probability | Household and community samples | 14.4%                                                | Werlabs   NR   NR                                                                       | No data                                                                              | -                                                |
| Region (Sweden Public Health Authority) <sup>251</sup>          | 2020-06-15 to 2020-07-15 | Uppland   Stockholm                                            | Local            | High                 | 149616      | NR                                                                               | NR         | Non-probability | Household and community samples | 17.6%                                                | NR   NR   NR                                                                            | No data                                                                              | -                                                |
| Lundkvist (Uppsala University) <sup>253</sup>                   | 2020-06-17 to 2020-06-18 | Uppland, Södermanland   Stockholm                              | Sublocal         | High                 | 123         | Mean 37 (NR)                                                                     | 57.7       | Probability     | Household and community samples | 4.1% (0.6–7.6%)                                      | Zhejiang Orient Gene Biotech Co Ltd   COVID-19 IgG / IgM Rapid Test Cassette   IgG, IgM | 0.4%, 1.0% (FINDDx / MUHC independent evaluation)                                    | -                                                |

| Article Author (Study Organization)                                          | Sampling Dates (YMD)     | Location                                                                                                | Geographic Scope | Overall Risk of Bias | Sample Size | Age          | Female (%) | Sampling method | Sample frame                    | Uncorrected Seroprevalence (95% Confidence Interval) | Test Manufacturers   Isotypes                                                           | Test Sens, Spec (Source)                          | Corrected Seroprevalence (95% Credible Interval) |
|------------------------------------------------------------------------------|--------------------------|---------------------------------------------------------------------------------------------------------|------------------|----------------------|-------------|--------------|------------|-----------------|---------------------------------|------------------------------------------------------|-----------------------------------------------------------------------------------------|---------------------------------------------------|--------------------------------------------------|
| Lundkvist (Uppsala University) <sup>253</sup>                                | 2020-06-17 to 2020-06-18 | Uppland, Södermanland   Stockholm                                                                       | Sublocal         | High                 | 90          | Mean 50 (NR) | 28.9       | Probability     | Household and community samples | 30.0% (20.3-39.7%)                                   | Zhejiang Orient Gene Biotech Co Ltd   COVID-19 IgG / IgM Rapid Test Cassette   IgG, IgM | 0.4%, 1.0% (FINDDx / MUHC independent evaluation) | -                                                |
| Swedish Public Health Agency (Sweden Public Health Authority) <sup>255</sup> | 2020-06-08 to 2020-06-14 | Örebro, Västerbotten Västra Götaland, Skåne, Jönköping, Kalmar, Uppsala, Stockholm, Jämtland-Härjedalen | National         | High                 | 1200        | NR           | NR         | Non-probability | Residual sera                   | 5.2% (3.7-7.1%)                                      | Sci LifeLab / KTH   NR   NR                                                             | 99.4%, 0.0% (Used author-adjusted estimate)       | 5.2% (4.0-6.5%)                                  |
| Swedish Public Health Agency (Sweden Public Health Authority) <sup>255</sup> | 2020-06-01 to 2020-06-07 | Örebro, Västerbotten Västra Götaland, Skåne, Jönköping, Kalmar, Uppsala, Stockholm, Jämtland-Härjedalen | National         | High                 | 1200        | NR           | NR         | Non-probability | Residual sera                   | 6.8% (5.1-8.8%)                                      | Sci LifeLab / KTH   NR   NR                                                             | 99.4%, 0.0% (Used author-adjusted estimate)       | 6.8% (5.4-8.3%)                                  |
| Swedish Public Health Agency (Sweden Public Health Authority) <sup>255</sup> | 2020-05-25 to 2020-05-31 | Örebro, Västerbotten Västra Götaland, Skåne, Jönköping, Kalmar, Uppsala, Stockholm, Jämtland-Härjedalen | National         | High                 | 1200        | NR           | NR         | Non-probability | Residual sera                   | 5.7% (4.0-7.7%)                                      | Sci LifeLab / KTH   NR   NR                                                             | 99.4%, 0.0% (Used author-adjusted estimate)       | 5.7% (4.5-7.1%)                                  |
| Swedish Public Health                                                        | 2020-05-18 to 2020-05-24 | Örebro, Skåne,                                                                                          | National         | High                 | 1200        | NR           | NR         | Non-probability | Residual sera                   | 5.2% (3.7-7.0%)                                      | Sci LifeLab / KTH   NR   NR                                                             | 99.4%, 0.0% (Used author-                         | 5.2% (4.0-6.5%)                                  |

| Article Author (Study Organization)                                          | Sampling Dates (YMD)     | Location                                                                                                 | Geographic Scope | Overall Risk of Bias | Sample Size | Age                                                                                                     | Female (%) | Sampling method | Sample frame                    | Uncorrected Seroprevalence (95% Confidence Interval) | Test Manufacturers   Isotypes                      | Test Sens, Spec (Source)                                  | Corrected Seroprevalence (95% Credible Interval) |
|------------------------------------------------------------------------------|--------------------------|----------------------------------------------------------------------------------------------------------|------------------|----------------------|-------------|---------------------------------------------------------------------------------------------------------|------------|-----------------|---------------------------------|------------------------------------------------------|----------------------------------------------------|-----------------------------------------------------------|--------------------------------------------------|
| Agency (Sweden Public Health Authority) <sup>255</sup>                       |                          | Stockholm, Jönköping, Kalmar, Uppsala, Västerbotten, Västra Götaland, Jämtland-Härjedalen                |                  |                      |             |                                                                                                         |            |                 |                                 |                                                      |                                                    | adjusted estimate)                                        |                                                  |
| Roxhed (KTH Royal Institute of Technology) <sup>256</sup>                    | 2020-04-01 to 2020-05-21 | Uppland   Stockholm                                                                                      | Local            | Moderate             | 878         | 20-29 (n=135); 30-39 (n=174); 40-49 (n=165); 50-59 (n=151); 60-69 (n=130); 70-74 (n=79); Missing (n=44) | 55.0       | Probability     | Household and community samples | 5.4%                                                 | Author-designed   N/A - Author-designed   IgG, IgM | 100.0%, 100.0% (Test developer / manufacturer evaluation) | 5.4% (3.9-7.1%)                                  |
| Swedish Public Health Agency (Sweden Public Health Authority) <sup>255</sup> | 2020-05-11 to 2020-05-17 | Örebro, Västerbotten, Västra Götaland, Skåne, Jönköping, Kalmar, Uppsala, Stockholm, Jämtland-Härjedalen | National         | High                 | 1200        | NR                                                                                                      | NR         | Non-probability | Residual sera                   | 4.5% (3.1-6.2%)                                      | Sci LifeLab / KTH   NR   NR                        | 99.4%, 0.0% (Used author-adjusted estimate)               | 4.5% (3.4-5.8%)                                  |
| Swedish Public Health Agency (Sweden Public Health Authority) <sup>255</sup> | 2020-05-04 to 2020-05-10 | Örebro, Västerbotten, Västra Götaland, Skåne, Jönköping, Kalmar, Uppsala, Stockholm, Jämtland-Härjedalen | National         | High                 | 1200        | NR                                                                                                      | NR         | Non-probability | Residual sera                   | 3.9% (2.6-5.4%)                                      | Sci LifeLab / KTH   NR   NR                        | 99.4%, 0.0% (Used author-adjusted estimate)               | 3.9% (2.9-5.0%)                                  |
| Swedish Public Health Agency (Sweden)                                        | 2020-04-27 to 2020-05-03 | Örebro, Västerbotten, Västra Götaland,                                                                   | National         | High                 | 1200        | NR                                                                                                      | NR         | Non-probability | Residual sera                   | 4.0% (2.7-5.7%)                                      | Sci LifeLab / KTH   NR   NR                        | 99.4%, 0.0% (Used author-adjusted estimate)               | 4.0% (3.0-5.2%)                                  |



| Article Author (Study Organization)                                          | Sampling Dates (YMD)     | Location                                                                                                 | Geographic Scope | Overall Risk of Bias | Sample Size | Age                                                                                                                                     | Female (%) | Sampling method | Sample frame                    | Uncorrected Seroprevalence (95% Confidence Interval) | Test Manufacturers   Names   Isotypes                                                                                                                   | Test Sens, Spec (Source)                                | Corrected Seroprevalence (95% Credible Interval) |
|------------------------------------------------------------------------------|--------------------------|----------------------------------------------------------------------------------------------------------|------------------|----------------------|-------------|-----------------------------------------------------------------------------------------------------------------------------------------|------------|-----------------|---------------------------------|------------------------------------------------------|---------------------------------------------------------------------------------------------------------------------------------------------------------|---------------------------------------------------------|--------------------------------------------------|
| Public Health Authority) <sup>255</sup>                                      |                          | Skåne, Jönköping, Kalmar, Uppsala, Stockholm, Jämtland-Härjedalen                                        |                  |                      |             |                                                                                                                                         |            |                 |                                 |                                                      |                                                                                                                                                         |                                                         |                                                  |
| Swedish Public Health Agency (Sweden Public Health Authority) <sup>255</sup> | 2020-04-20 to 2020-04-26 | Örebro, Västerbotten, Västra Götaland, Skåne, Jönköping, Kalmar, Uppsala, Stockholm, Jämtland-Härjedalen | National         | High                 | 1200        | NR                                                                                                                                      | NR         | Non-probability | Residual sera                   | 5.3% (3.8-7.1%)                                      | Sci LifeLab / KTH   NR   NR                                                                                                                             | 99.4%, 0.0% (Used author-adjusted estimate)             | 5.3% (4.1-6.6%)                                  |
| <b>Switzerland</b>                                                           |                          |                                                                                                          |                  |                      |             |                                                                                                                                         |            |                 |                                 |                                                      |                                                                                                                                                         |                                                         |                                                  |
| Ulyte (University of Zurich) <sup>259</sup>                                  | 2020-06-16 to 2020-11-19 | Zurich   Zurich                                                                                          | Regional         | Low                  | 2507        | Median 8 (lower school); 11 (middle school); 14 (upper school) (Range 6-10 (lower school); 8-13 (middle school); 11-16 (upper school) ) | NR         | Probability     | Household and community samples | 8.2%                                                 | Institute of Medical Virology (IMV) of the University of Zurich   ABCORA 2.0 binding assay   IgG, IgA, IgM                                              | 94.3%, 99.0% (Test developer / manufacturer evaluation) | 6.8% (2.5-9.8%)                                  |
| Anker (Université de Fribourg) <sup>260</sup>                                | 2020-07-08 to 2020-10-14 | Canton of Fribourg                                                                                       | Regional         | Moderate             | 418         | Mean 58 (SD 17)                                                                                                                         | 54.1       | Probability     | Household and community samples | 8.0% (4.0-12.0%)                                     | N/A - institutionally designed (Centre Hospitalier Universitaire Vaudois (CHUV); l'École Polytechnique Fédérale de Lausanne (EPFL) et l'Institut Suisse | 96.6%, 99.7% (Used author-adjusted estimate)            | 8.0% (5.6-10.8%)                                 |

| Article Author (Study Organization)                                                                                          | Sampling Dates (YMD)     | Location        | Geographic Scope | Overall Risk of Bias | Sample Size | Age   | Female (%) | Sampling method | Sample frame                    | Uncorrected Seroprevalence (95% Confidence Interval) | Test Manufacturers   Names   Isotypes                                                                                                                                                   | Test Sens, Spec (Source)                                  | Corrected Seroprevalence (95% Credible Interval) |
|------------------------------------------------------------------------------------------------------------------------------|--------------------------|-----------------|------------------|----------------------|-------------|-------|------------|-----------------|---------------------------------|------------------------------------------------------|-----------------------------------------------------------------------------------------------------------------------------------------------------------------------------------------|-----------------------------------------------------------|--------------------------------------------------|
|                                                                                                                              |                          |                 |                  |                      |             |       |            |                 |                                 |                                                      | de Recherche sur les Vaccins)   SenASTrIS (Sensitive Anti-SARS-CoV-2 Spike Trimer Immunoglobulin Serological)   IgG, IgA                                                                |                                                           |                                                  |
| Universita della Svizzera Italiana (The Institute of Public Health on the Università della Svizzera italiana) <sup>262</sup> | 2020-07-01 to 2020-07-31 |                 | Local            | Unclear              | 647         | 20-64 | NR         | Probability     | Household and community samples | 11.0%                                                | Centre Hospitalier Universitaire Vaudois (CHUV) in collaboration with the Swiss Federal Institute of Technology in Lausanne (EPFL) and the Swiss Centre for Vaccine Research.   NR   NR | No data                                                   | -                                                |
| Emmenegger (University of Zurich) <sup>263</sup>                                                                             | 2020-07-01 to 2020-07-15 | Zurich   Zurich | Local            | Moderate             | 1067        | NR    | NR         | Non-probability | Blood donors                    | 0.7% (0.3-1.2%)                                      | Author-designed   Tripartite Automated Blood Immunoassay   IgG                                                                                                                          | 100.0%, 100.0% (Test developer / manufacturer evaluation) | 0.4% (0.0-1.0%)                                  |
| Emmenegger (University of Zurich) <sup>263</sup>                                                                             | 2020-05-15 to 2020-07-15 | Zurich   Zurich | Local            | Moderate             | 12831       | NR    | NR         | Non-probability | Residual sera                   | 0.9%                                                 | Author-designed   Tripartite Automated Blood Immunoassay   IgG                                                                                                                          | 100.0%, 100.0% (Test developer / manufacturer evaluation) | 0.5% (0.0-0.9%)                                  |
| Ulyte (University of Zurich) <sup>264</sup>                                                                                  | 2020-06-16 to 2020-07-09 | Zurich   Zurich | Local            | Moderate             | 577         | NR    | NR         | Probability     | Household and community samples | 3.3% (1.4-5.5%)                                      | Swiss Federal Institute of Technology in Lausanne; Swiss Vaccine Center; Centre Hospitalier Universitaire                                                                               | 98.3%, 98.4% (Used author-adjusted estimate)              | 3.3% (2.1-5.0%)                                  |

| Article Author (Study Organization)                                              | Sampling Dates (YMD)     | Location         | Geographic Scope | Overall Risk of Bias | Sample Size | Age                     | Female (%) | Sampling method | Sample frame                    | Uncorrected Seroprevalence (95% Confidence Interval) | Test Manufacturers   Names   Isotypes                                                              | Test Sens, Spec (Source)                                  | Corrected Seroprevalence (95% Credible Interval) |
|----------------------------------------------------------------------------------|--------------------------|------------------|------------------|----------------------|-------------|-------------------------|------------|-----------------|---------------------------------|------------------------------------------------------|----------------------------------------------------------------------------------------------------|-----------------------------------------------------------|--------------------------------------------------|
|                                                                                  |                          |                  |                  |                      |             |                         |            |                 |                                 |                                                      | Vaudois   SenASTrIS (Sensitive Anti-SARS-COV-2 Spike Trimer Immunoglobulin Serological)   IgG, IgA |                                                           |                                                  |
| Bi (Johns Hopkins Bloomberg School of Public Health) <sup>265</sup>              | 2020-04-03 to 2020-06-30 | Geneva           | Regional         | Moderate             | 4534        | Median 53 (IQR 34-65)   | 53.6       | Non-probability | Household and community samples | 6.6% (6.0-7.0%)                                      | Euroimmun   NR   IgG                                                                               | 0.6%, 0.9% (FINDDx / MUHC independent evaluation)         | -                                                |
| Richard (Geneva University Hospital) <sup>266</sup>                              | 2020-04-06 to 2020-06-30 | Canton of Geneva | Regional         | Low                  | 8344        | Mean 46.9 (Range 5-94)  | 53.5       | Probability     | Household and community samples | 7.8% (6.8-8.9%)                                      | Euroimmun   SARS-CoV-2 IgG ELISA   IgG                                                             | 93.0%, 100.0% (Used author-adjusted estimate)             | 7.8% (7.2-8.4%)                                  |
| Fenwick (Lausanne University Hospital and University of Lausanne) <sup>267</sup> | 2020-05-04 to 2020-06-27 | Vaud             | Regional         | High                 | 311         | NR                      | NR         | Probability     | Household and community samples | 3.9%                                                 | Roche   Elecsys anti-SARS-CoV-2 assay   NR                                                         | 0.9%, 1.0% (FINDDx / MUHC independent evaluation)         | -                                                |
| Posfay-Barbe (Geneva University Hospital) <sup>269</sup>                         | 2020-04-01 to 2020-04-30 | Geneva           | Sublocal         | High                 | 208         | Median 9 (IQR 3.6-13.3) | 44.7       | Non-probability | Residual sera                   | 9.1%                                                 | Euroimmun   Euroimmun IgG assay   IgG                                                              | 0.8%, 1.0% (FINDDx / MUHC independent evaluation)         | -                                                |
| Emmenegger (University of Zurich) <sup>263</sup>                                 | 2020-04-01 to 2020-04-30 | Zurich   Zurich  | Local            | Moderate             | 1469        | NR                      | NR         | Non-probability | Blood donors                    | 1.2%                                                 | Author-designed   Tripartite Automated Blood Immunoassay   IgG                                     | 100.0%, 100.0% (Test developer / manufacturer evaluation) | 0.8% (0.0-1.5%)                                  |
| Emmenegger (University of Zurich) <sup>263</sup>                                 | 2020-04-01 to 2020-04-30 | Zurich   Zurich  | Local            | Moderate             | 4275        | NR                      | NR         | Non-probability | Residual sera                   | 1.4% (1.0-1.7%)                                      | Author-designed   Tripartite Automated Blood Immunoassay   IgG                                     | 100.0%, 100.0% (Test developer / manufacturer evaluation) | 0.9% (0.0-1.5%)                                  |

| Article Author (Study Organization)                                           | Sampling Dates (YMD)     | Location         | Geographic Scope | Overall Risk of Bias | Sample Size | Age   | Female (%) | Sampling method | Sample frame                    | Uncorrected Seroprevalence (95% Confidence Interval) | Test Manufacturers   Isotypes                                  | Test Sens, Spec (Source)                                  | Corrected Seroprevalence (95% Credible Interval) |
|-------------------------------------------------------------------------------|--------------------------|------------------|------------------|----------------------|-------------|-------|------------|-----------------|---------------------------------|------------------------------------------------------|----------------------------------------------------------------|-----------------------------------------------------------|--------------------------------------------------|
| Emmenegger (University of Zurich) <sup>263</sup>                              | 2020-03-01 to 2020-03-31 | Zurich   Zurich  | Local            | Moderate             | 3806        | NR    | NR         | Non-probability | Residual sera                   | 0.3% (0.1-0.5%)                                      | Author-designed   Tripartite Automated Blood Immunoassay   IgG | 100.0%, 100.0% (Test developer / manufacturer evaluation) | 0.2% (0.0-0.4%)                                  |
| <b>The United Kingdom</b>                                                     |                          |                  |                  |                      |             |       |            |                 |                                 |                                                      |                                                                |                                                           |                                                  |
| Office for National Statistics (Office of National Statistics) <sup>271</sup> | 2020-12-18 to 2021-01-14 | England          | Regional         | Moderate             | 24150       | older | NR         | Probability     | Household and community samples | 15.3% (14.7-15.9%)                                   | University of Oxford   Oxford immunoassay   IgG                | 99.0%, 99.1% (Author-reported independent evaluation)     | 14.6% (13.9-15.4%)                               |
| Office for National Statistics (Office of National Statistics) <sup>271</sup> | 2020-12-18 to 2021-01-14 | Northern Ireland | Regional         | High                 | 313         | older | NR         | Probability     | Household and community samples | 12.0% (7.8-17.4%)                                    | University of Oxford   Oxford immunoassay   IgG                | 99.0%, 99.1% (Author-reported independent evaluation)     | 11.2% (7.8-15.1%)                                |
| Office for National Statistics (Office of National Statistics) <sup>271</sup> | 2020-12-18 to 2021-01-14 | Scotland         | Regional         | Moderate             | 1832        | older | NR         | Probability     | Household and community samples | 10.7% (9.1-12.4%)                                    | University of Oxford   Oxford immunoassay   IgG                | 99.0%, 99.1% (Author-reported independent evaluation)     | 9.9% (8.4-11.5%)                                 |
| Office for National Statistics (Office of National Statistics) <sup>271</sup> | 2020-12-18 to 2021-01-14 | Wales            | Regional         | Moderate             | 732         | older | NR         | Probability     | Household and community samples | 11.5% (8.6-14.9%)                                    | University of Oxford   Oxford immunoassay   IgG                | 99.0%, 99.1% (Author-reported independent evaluation)     | 10.8% (8.4-13.3%)                                |
| Office for National Statistics (Office of National Statistics) <sup>272</sup> | 2020-11-20 to 2020-12-17 | England          | Regional         | Moderate             | 21684       | older | NR         | Probability     | Household and community samples | 10.1% (9.6-10.6%)                                    | University of Oxford   Oxford immunoassay   IgG                | 99.0%, 99.1% (Author-reported independent evaluation)     | 9.3% (8.5-10.0%)                                 |
| Office for National Statistics (Office of National Statistics) <sup>272</sup> | 2020-11-20 to 2020-12-17 | Northern Ireland | Regional         | High                 | 248         | older | NR         | Probability     | Household and community samples | 3.7% (1.7-7.1%)                                      | University of Oxford   Oxford immunoassay   IgG                | 99.0%, 99.1% (Author-reported independent evaluation)     | 3.0% (0.7-5.6%)                                  |

| Article Author (Study Organization)                                           | Sampling Dates (YMD)     | Location         | Geographic Scope | Overall Risk of Bias | Sample Size | Age   | Female (%) | Sampling method | Sample frame                    | Uncorrected Seroprevalence (95% Confidence Interval) | Test Manufacturers   Isotypes                   | Test Sens, Spec (Source)                              | Corrected Seroprevalence (95% Credible Interval) |
|-------------------------------------------------------------------------------|--------------------------|------------------|------------------|----------------------|-------------|-------|------------|-----------------|---------------------------------|------------------------------------------------------|-------------------------------------------------|-------------------------------------------------------|--------------------------------------------------|
| Office for National Statistics (Office of National Statistics) <sup>272</sup> | 2020-11-20 to 2020-12-17 | Scotland         | Regional         | Moderate             | 1034        | older | NR         | Probability     | Household and community samples | 5.9% (4.4-7.6%)                                      | University of Oxford   Oxford immunoassay   IgG | 99.0%, 99.1% (Author-reported independent evaluation) | 5.1% (3.5-6.7%)                                  |
| Office for National Statistics (Office of National Statistics) <sup>272</sup> | 2020-11-20 to 2020-12-17 | Wales            | Regional         | Moderate             | 631         | older | NR         | Probability     | Household and community samples | 7.2% (5.1-9.9%)                                      | University of Oxford   Oxford immunoassay   IgG | 99.0%, 99.1% (Author-reported independent evaluation) | 6.3% (4.3-8.6%)                                  |
| Office for National Statistics (Office of National Statistics) <sup>275</sup> | 2020-10-23 to 2020-11-19 | Scotland         | Regional         | High                 | 397         | older | NR         | Probability     | Household and community samples | 7.8% (5.0-11.7%)                                     | University of Oxford   Oxford immunoassay   IgG | 99.0%, 99.1% (Author-reported independent evaluation) | 6.8% (4.2-9.8%)                                  |
| Office for National Statistics (Office of National Statistics) <sup>275</sup> | 2020-10-23 to 2020-11-19 | Northern Ireland | Regional         | High                 | 333         | older | NR         | Probability     | Household and community samples | 3.5% (1.6-6.4%)                                      | University of Oxford   Oxford immunoassay   IgG | 99.0%, 99.1% (Author-reported independent evaluation) | 2.5% (0.7-4.9%)                                  |
| Office for National Statistics (Office of National Statistics) <sup>275</sup> | 2020-10-23 to 2020-11-19 | Wales            | Regional         | High                 | 497         | older | NR         | Probability     | Household and community samples | 6.1% (4.0-9.0%)                                      | University of Oxford   Oxford immunoassay   IgG | 99.0%, 99.1% (Author-reported independent evaluation) | 5.3% (3.2-7.6%)                                  |
| Office for National Statistics (Office of National Statistics) <sup>275</sup> | 2020-10-23 to 2020-11-19 | England          | Regional         | Moderate             | 15834       | older | NR         | Probability     | Household and community samples | 8.7% (8.1-9.4%)                                      | University of Oxford   Oxford immunoassay   IgG | 99.0%, 99.1% (Author-reported independent evaluation) | 7.9% (7.1-8.6%)                                  |
| Office for National Statistics (Office of National Statistics) <sup>276</sup> | 2020-09-25 to 2020-10-22 | England          | Regional         | Moderate             | 15687       | older | NR         | Probability     | Household and community samples | 6.9% (6.4-7.5%)                                      | University of Oxford   Oxford immunoassay   IgG | 99.0%, 99.1% (Author-reported independent evaluation) | 6.0% (5.3-6.7%)                                  |
| Office for National                                                           | 2020-09-25 to 2020-10-22 | Northern Ireland | Regional         | High                 | 249         | older | NR         | Probability     | Household and                   | 2.8% (1.2-5.5%)                                      | University of Oxford                            | 99.0%, 99.1% (Author-                                 | 1.7% (0.0-3.9%)                                  |

| Article Author (Study Organization)                                           | Sampling Dates (YMD)     | Location | Geographic Scope | Overall Risk of Bias | Sample Size | Age                                                                                                                | Female (%) | Sampling method | Sample frame                    | Uncorrected Seroprevalence (95% Confidence Interval) | Test Manufacturers   Isotypes                                                | Test Sens, Spec (Source)                                | Corrected Seroprevalence (95% Credible Interval) |
|-------------------------------------------------------------------------------|--------------------------|----------|------------------|----------------------|-------------|--------------------------------------------------------------------------------------------------------------------|------------|-----------------|---------------------------------|------------------------------------------------------|------------------------------------------------------------------------------|---------------------------------------------------------|--------------------------------------------------|
| Statistics (Office of National Statistics) <sup>276</sup>                     |                          |          |                  |                      |             |                                                                                                                    |            |                 | community samples               |                                                      | Oxford immunoassay   IgG                                                     | reported independent evaluation)                        |                                                  |
| Office for National Statistics (Office of National Statistics) <sup>276</sup> | 2020-09-25 to 2020-10-22 | Scotland | Regional         | High                 | 383         | older                                                                                                              | NR         | Probability     | Household and community samples | 6.8% (4.3-10.2%)                                     | University of Oxford   Oxford immunoassay   IgG                              | 99.0%, 99.1% (Author-reported independent evaluation)   | 6.0% (3.6-8.8%)                                  |
| Office for National Statistics (Office of National Statistics) <sup>276</sup> | 2020-09-25 to 2020-10-22 | Wales    | Regional         | High                 | 473         | older                                                                                                              | NR         | Probability     | Household and community samples | 4.7% (2.9-7.3%)                                      | University of Oxford   Oxford immunoassay   IgG                              | 99.0%, 99.1% (Author-reported independent evaluation)   | 3.9% (1.9-6.1%)                                  |
| Ward (Imperial College London) <sup>277</sup>                                 | 2020-09-15 to 2020-09-28 |          | National         | Moderate             | 159367      | 18-24 (n=8763); 25-34 (n=20212); 35-44 (n=26687); 45-54 (n=32403); 55-64 (n=32870); 65-74 (n=26542); 75+ (n=11890) | 56.4       | Probability     | Household and community samples | 4.4% (4.3-4.5%)                                      | Fortress Diagnostics; Northern Ireland   LFIA IgG Fortress Diagnostics   IgG | 84.4%, 98.6% (Test developer / manufacturer evaluation) | 2.3% (0.0-4.5%)                                  |
| Office for National Statistics (Office of National Statistics) <sup>278</sup> | 2020-08-28 to 2020-09-24 | Wales    | Regional         | High                 | 236         | older                                                                                                              | NR         | Probability     | Household and community samples | 4.7% (2.0-9.2%)                                      | University of Oxford   Oxford immunoassay   IgG                              | 99.0%, 99.1% (Author-reported independent evaluation)   | 4.0% (1.3-7.2%)                                  |
| Office for National Statistics (Office of National Statistics) <sup>278</sup> | 2020-08-28 to 2020-09-24 | England  | Regional         | Moderate             | 8742        | older                                                                                                              | NR         | Probability     | Household and community samples | 5.8% (5.1-6.5%)                                      | University of Oxford   Oxford immunoassay   IgG                              | 99.0%, 99.1% (Author-reported independent evaluation)   | 4.9% (4.1-5.7%)                                  |
| Public Health England (Public Health England) <sup>279</sup>                  | 2020-08-24 to 2020-09-18 | England  | National         | Moderate             | 8230        | >16                                                                                                                | NR         | Probability     | Blood donors                    | 6.1% (5.4-6.8%)                                      | EUROIMMUN   Euroimmun Anti-SARS-CoV-2 ELISA IgG   IgG                        | 83.0%, 99.3% (Used author-adjusted estimate)            | 6.1% (5.6-6.6%)                                  |

| Article Author (Study Organization)                                           | Sampling Dates (YMD)     | Location | Geographic Scope | Overall Risk of Bias | Sample Size | Age                                                                                                               | Female (%) | Sampling method | Sample frame                    | Uncorrected Seroprevalence (95% Confidence Interval) | Test Manufacturers   Names   Isotypes                                        | Test Sens, Spec (Source)                                | Corrected Seroprevalence (95% Credible Interval) |
|-------------------------------------------------------------------------------|--------------------------|----------|------------------|----------------------|-------------|-------------------------------------------------------------------------------------------------------------------|------------|-----------------|---------------------------------|------------------------------------------------------|------------------------------------------------------------------------------|---------------------------------------------------------|--------------------------------------------------|
| Abo-Leyah (Ninewells Hospital and Medical School) <sup>280</sup>              | 2020-05-28 to 2020-09-02 | Scotland | Regional         | High                 | 231         | NR                                                                                                                | NR         | Probability     | Residual sera                   | 4.8%                                                 | Siemens   Siemens SARS-CoV-2 antibody assay   NR                             | 0.9%, 1.0% (FINDDx / MUHC independent evaluation)       | -                                                |
| Public Health England (Public Health England) <sup>281</sup>                  | 2020-07-27 to 2020-08-30 | England  | National         | Moderate             | 8764        | >16                                                                                                               | NR         | Probability     | Blood donors                    | 5.3% (4.8-5.8%)                                      | EUROIMMUN   Euroimmun Anti-SARS-CoV-2 ELISA IgG   IgG                        | 83.0%, 99.3% (Used author-adjusted estimate)            | 5.3% (4.8-5.8%)                                  |
| Office for National Statistics (Office of National Statistics) <sup>282</sup> | 2020-07-31 to 2020-08-27 | England  | Regional         | Moderate             | 6189        | older                                                                                                             | NR         | Probability     | Household and community samples | 5.6% (4.7-6.5%)                                      | University of Oxford   Oxford immunoassay   IgG                              | 99.0%, 99.1% (Author-reported independent evaluation)   | 4.7% (3.8-5.5%)                                  |
| Public Health England (Public Health England) <sup>279</sup>                  | 2020-06-15 to 2020-08-16 | England  | National         | Moderate             | 4315        | None                                                                                                              | NR         | Probability     | Residual sera                   | 6.5% (5.5-7.6%)                                      | Abbott   Abbott Architect SARS-CoV-2 IgG assay   IgG                         | 0.4%, 1.0% (FINDDx / MUHC independent evaluation)       | -                                                |
| Public Health England (Public Health England) <sup>279</sup>                  | 2020-06-15 to 2020-08-16 | England  | National         | Low                  | 1212        | <30                                                                                                               | NR         | Probability     | Residual sera                   | 5.2% (3.9-7.0%)                                      | Abbott   Abbott Architect SARS-CoV-2 IgG assay   IgG                         | 0.4%, 1.0% (FINDDx / MUHC independent evaluation)       | -                                                |
| Ward (Imperial College London) <sup>277</sup>                                 | 2020-07-31 to 2020-08-13 |          | National         | Moderate             | 105829      | 18-24 (n=6493); 25-34 (n=13573); 35-44 (n=17130); 45-54 (n=21487); 55-64 (n=21840); 65-74 (n=17617); 75+ (n=7689) | 56.3       | Probability     | Household and community samples | 4.7% (4.6-4.8%)                                      | Fortress Diagnostics; Northern Ireland   LFIA IgG Fortress Diagnostics   IgG | 84.4%, 98.6% (Test developer / manufacturer evaluation) | 2.6% (0.0-4.9%)                                  |
| Public Health Scotland (Public Health Scotland) <sup>285</sup>                | 2020-06-29 to 2020-08-09 | Scotland | National         | Moderate             | 3220        | NR                                                                                                                | NR         | Non-probability | Blood donors                    | 3.1% (2.5-3.8%)                                      | NR   NR   NR                                                                 | 87.5%, 98.6% (Used author-adjusted estimate)            | 3.1% (2.5-3.7%)                                  |
| Public Health Scotland (Public Health Scotland) <sup>285</sup>                | 2020-04-20 to 2020-08-09 | Scotland | National         | Moderate             | 9802        | 0-19 (n=2341); 20-39 (n=2407); 40-                                                                                | 50.5       | Non-probability | Residual sera                   | 4.9%                                                 | NR   NR   NR                                                                 | 87.5%, 98.6% (Test developer / manufacturer evaluation) | 2.6% (0.1-5.0%)                                  |

| Article Author (Study Organization)                                           | Sampling Dates (YMD)     | Location | Geographic Scope | Overall Risk of Bias | Sample Size | Age                                                                                                               | Female (%) | Sampling method | Sample frame                    | Uncorrected Seroprevalence (95% Confidence Interval) | Test Manufacturers   Names   Isotypes                                    | Test Sens, Spec (Source)                                | Corrected Seroprevalence (95% Credible Interval) |
|-------------------------------------------------------------------------------|--------------------------|----------|------------------|----------------------|-------------|-------------------------------------------------------------------------------------------------------------------|------------|-----------------|---------------------------------|------------------------------------------------------|--------------------------------------------------------------------------|---------------------------------------------------------|--------------------------------------------------|
|                                                                               |                          |          |                  |                      |             | 59 (n=2171); 60+ (n=2883)                                                                                         |            |                 |                                 |                                                      |                                                                          |                                                         |                                                  |
| Public Health England (Public Health England) <sup>281</sup>                  | 2020-05-01 to 2020-08-05 | England  | National         | Moderate             | 568         | <20                                                                                                               | NR         | Probability     | Household and community samples | 5.2% (3.2-7.8%)                                      | Abbott   Abbott Architect SARS-CoV-2 IgG assay   IgG                     | 0.4%, 1.0% (FINDDx / MUHC independent evaluation)       | -                                                |
| Office for National Statistics (Office of National Statistics) <sup>282</sup> | 2020-07-03 to 2020-07-30 | England  | Regional         | Moderate             | 3236        | older                                                                                                             | NR         | Probability     | Household and community samples | 6.5% (5.2-8.1%)                                      | University of Oxford   Oxford immunoassay   IgG                          | 99.0%, 99.1% (Author-reported independent evaluation)   | 5.6% (4.5-6.6%)                                  |
| Public Health England (Public Health England) <sup>288</sup>                  | 2020-06-29 to 2020-07-28 | England  | National         | Moderate             | 9388        | >16                                                                                                               | NR         | Probability     | Blood donors                    | 5.9% (5.3-6.5%)                                      | EUROIMMUN   Euroimmun Anti-SARS-CoV-2 ELISA IgG   IgG                    | 83.0%, 99.3% (Used author-adjusted estimate)            | 5.9% (5.4-6.4%)                                  |
| Ward (Imperial College London) <sup>290</sup>                                 | 2020-06-20 to 2020-07-13 | England  | National         | Low                  | 99908       | 18-24 (n=6499); 25-34 (n=13366); 35-44 (n=17052); 45-54 (n=20634); 55-64 (n=20404); 65-74 (n=15543); 75+ (n=6410) | 56.1       | Probability     | Household and community samples | 5.6% (5.4-5.7%)                                      | Fortress Diagnostics; Northern Ireland   Fortress Diagnostics LFIA   IgG | 84.4%, 98.6% (Test developer / manufacturer evaluation) | 3.5% (0.2-6.1%)                                  |
| Office for National Statistics (Office of National Statistics) <sup>295</sup> | 2020-06-05 to 2020-07-02 | England  | Regional         | Moderate             | 2392        | older                                                                                                             | NR         | Probability     | Household and community samples | 4.2%                                                 | University of Oxford   Oxford immunoassay   IgG                          | 99.0%, 99.1% (Author-reported independent evaluation)   | 3.2% (2.2-4.3%)                                  |
| Public Health England (Public Health England) <sup>288</sup>                  | 2020-03-16 to 2020-06-30 | England  | National         | Moderate             | 6000        | >64                                                                                                               | NR         | Probability     | Residual sera                   | 3.9%                                                 | EUROIMMUN   Euroimmun Anti-SARS-CoV-2 ELISA IgG   IgG                    | 0.0%, 0.0% (Used author-adjusted estimate)              | 3.9% (3.4-4.4%)                                  |
| Public Health England (Public Health England) <sup>299</sup>                  | 2020-06-01 to 2020-06-28 | England  | National         | Moderate             | 10318       | 17-69                                                                                                             | NR         | Probability     | Blood donors                    | 7.2% (6.6-7.8%)                                      | EUROIMMUN   Euroimmun Anti-SARS-CoV-2 ELISA IgG   IgG                    | 82.5%, 99.1% (Used author-adjusted estimate)            | 7.2% (6.7-7.7%)                                  |



| Article Author (Study Organization)                                           | Sampling Dates (YMD)     | Location           | Geographic Scope | Overall Risk of Bias | Sample Size | Age                                                           | Female (%) | Sampling method | Sample frame                    | Uncorrected Seroprevalence (95% Confidence Interval) | Test Manufacturers   Names   Isotypes                 | Test Sens, Spec (Source)                                 | Corrected Seroprevalence (95% Credible Interval) |
|-------------------------------------------------------------------------------|--------------------------|--------------------|------------------|----------------------|-------------|---------------------------------------------------------------|------------|-----------------|---------------------------------|------------------------------------------------------|-------------------------------------------------------|----------------------------------------------------------|--------------------------------------------------|
| Arif (Watford General Hospital) <sup>306</sup>                                | 2020-03-27 to 2020-06-08 | Watford            | Sublocal         | High                 | 443         | Mean 50.51 (NR)                                               | 50.6       | Non-probability | Residual sera                   | 1.6%                                                 | NR   NR   NR                                          | No data                                                  | -                                                |
| Office for National Statistics (Office of National Statistics) <sup>312</sup> | 2020-05-08 to 2020-06-04 | England            | Regional         | Moderate             | 1575        | older                                                         | NR         | Probability     | Household and community samples | 6.3% (4.5-8.7%)                                      | University of Oxford   Oxford immunoassay   IgG       | 99.0%, 99.1% (Author-reported independent evaluation)    | 5.4% (4.1-6.9%)                                  |
| Wells (King's College London) <sup>313</sup>                                  | 2020-04-27 to 2020-06-02 | South East England | Regional         | High                 | 431         | Mean 48.38 (SD 28)                                            | 85.2       | Non-probability | Household and community samples | 12.0% (9.1-15.2%)                                    | Imperial College London   NR   IgG, IgM               | 90.0%, 100.0% (Author-reported independent evaluation)   | 12.6% (4.3-21.6%)                                |
| Public Health England (Public Health England) <sup>299</sup>                  | 2020-05-04 to 2020-05-31 | England            | National         | Moderate             | 7686        | 17-69                                                         | NR         | Probability     | Blood donors                    | 8.3% (7.5-9.2%)                                      | EUROIMMUN   Euroimmun Anti-SARS-CoV-2 ELISA IgG   IgG | 82.5%, 99.1% (Used author-adjusted estimate)             | 8.3% (7.7-8.9%)                                  |
| Public Health England (Public Health England) <sup>281</sup>                  | 2020-05-01 to 2020-05-31 | England            | National         | Moderate             | 1061        | <30                                                           | NR         | Probability     | Residual sera                   | 7.3% (5.6-9.2%)                                      | Abbott   Abbott Architect SARS-CoV-2 IgG assay   IgG  | 95.7%, 99.1% (Used author-adjusted estimate)             | 7.3% (5.8-8.9%)                                  |
| Hughes (The Francis Crick Institute) <sup>316</sup>                           | 2020-03-16 to 2020-05-24 | Scotland   Glasgow | Local            | Moderate             | 6635        | 18-44 (n=1,662); 45-64 (n=2202); 65-74 (n=1244); >75 (n=1527) | 53.4       | Non-probability | Residual sera                   | 7.8% (7.2-8.5%)                                      | Francis Crick Institute   In house ELISA   IgG        | 95.3%, 97.2% (Test developer / manufacturer evaluation)  | 5.3% (2.9-7.0%)                                  |
| Thompson (University of Oxford) <sup>317</sup>                                | 2020-03-17 to 2020-05-18 | Scotland           | Regional         | Moderate             | 3500        | Median 47 (IQR 34-56)                                         | 53.4       | Probability     | Blood donors                    | 3.2%                                                 | N/A - Author designed   N/A - Author designed   NR    | 94.0%, 100.0% (Test developer / manufacturer evaluation) | 2.9% (0.5-4.7%)                                  |
| Public Health England (Public Health England) <sup>319</sup>                  | 2020-04-01 to 2020-04-30 | England            | National         | Moderate             | 647         | <30                                                           | NR         | Probability     | Residual sera                   | 6.1% (4.1-8.4%)                                      | Abbott   Abbott Architect SARS-CoV-2 IgG assay   IgG  | 95.7%, 99.1% (Used author-adjusted estimate)             | 6.1% (4.4-8.1%)                                  |
| Public Health England (Public Health England) <sup>319</sup>                  | 2020-04-01 to 2020-04-30 | England            | National         | Moderate             | 201         | <20                                                           | NR         | Probability     | Household and community samples | 3.8% (1.2-7.5%)                                      | Abbott   Abbott Architect SARS-CoV-2 IgG assay   IgG  | 95.7%, 99.1% (Used author-adjusted estimate)             | 3.8% (1.6-6.7%)                                  |

| Article Author (Study Organization)                          | Sampling Dates (YMD)     | Location         | Geographic Scope | Overall Risk of Bias | Sample Size | Age | Female (%) | Sampling method | Sample frame                    | Uncorrected Seroprevalence (95% Confidence Interval) | Test Manufacturers   Names   Isotypes                 | Test Sens, Spec (Source)                     | Corrected Seroprevalence (95% Credible Interval) |
|--------------------------------------------------------------|--------------------------|------------------|------------------|----------------------|-------------|-----|------------|-----------------|---------------------------------|------------------------------------------------------|-------------------------------------------------------|----------------------------------------------|--------------------------------------------------|
| Public Health England (Public Health England) <sup>320</sup> | 2020-04-24 to 2020-04-26 | England          | Regional         | Moderate             | 865         | >16 | NR         | Probability     | Blood donors                    | 5.0% (3.2-7.0%)                                      | EUROIMMUN   Euroimmun Anti-SARS-CoV-2 ELISA IgG   IgG | 82.5%, 99.1% (Used author-adjusted estimate) | 5.0% (3.7-6.6%)                                  |
| Public Health England (Public Health England) <sup>320</sup> | 2020-04-23 to 2020-04-24 | England          | Regional         | Moderate             | 1043        | >16 | NR         | Probability     | Blood donors                    | 7.3% (5.4-9.4%)                                      | EUROIMMUN   Euroimmun Anti-SARS-CoV-2 ELISA IgG   IgG | 82.5%, 99.1% (Used author-adjusted estimate) | 7.3% (5.8-9.0%)                                  |
| Public Health England (Public Health England) <sup>320</sup> | 2020-04-15 to 2020-04-20 | England          | Regional         | Moderate             | 936         | >16 | NR         | Probability     | Blood donors                    | 6.2% (4.4-8.4%)                                      | EUROIMMUN   Euroimmun Anti-SARS-CoV-2 ELISA IgG   IgG | 79.0%, 99.0% (Used author-adjusted estimate) | 6.2% (4.8-7.9%)                                  |
| Public Health England (Public Health England) <sup>320</sup> | 2020-04-14 to 2020-04-16 | England          | Regional         | Moderate             | 1017        | >16 | NR         | Probability     | Blood donors                    | 4.6% (3.0-6.4%)                                      | EUROIMMUN   Euroimmun Anti-SARS-CoV-2 ELISA IgG   IgG | 79.0%, 99.0% (Used author-adjusted estimate) | 4.6% (3.4-5.9%)                                  |
| Public Health England (Public Health England) <sup>320</sup> | 2020-04-09 to 2020-04-13 | England   London | Regional         | Moderate             | 1085        | >16 | NR         | Probability     | Blood donors                    | 11.1% (8.9-13.6%)                                    | EUROIMMUN   Euroimmun Anti-SARS-CoV-2 ELISA IgG   IgG | 82.5%, 99.1% (Used author-adjusted estimate) | 11.1% (9.3-13.0%)                                |
| Public Health England (Public Health England) <sup>320</sup> | 2020-04-02 to 2020-04-03 | England          | Regional         | Moderate             | 916         | >16 | NR         | Probability     | Blood donors                    | 2.4% (1.0-4.0%)                                      | EUROIMMUN   Euroimmun Anti-SARS-CoV-2 ELISA IgG   IgG | 82.5%, 99.1% (Used author-adjusted estimate) | 2.4% (1.5-3.4%)                                  |
| Public Health England (Public Health England) <sup>319</sup> | 2020-02-01 to 2020-03-31 | England          | National         | Moderate             | 443         | <30 | NR         | Probability     | Residual sera                   | 0.8% (0.0-2.5%)                                      | Abbott   Abbott Architect SARS-CoV-2 IgG assay   IgG  | 95.7%, 99.1% (Used author-adjusted estimate) | 0.8% (0.2-1.8%)                                  |
| Public Health England (Public Health England) <sup>319</sup> | 2020-02-01 to 2020-03-31 | England          | National         | Moderate             | 106         | <20 | NR         | Probability     | Household and community samples | 0.5% (0.0-3.6%)                                      | Abbott   Abbott Architect SARS-CoV-2 IgG assay   IgG  | 95.7%, 99.1% (Used author-adjusted estimate) | 0.5% (0.0-2.3%)                                  |
| Public Health England (Public Health England) <sup>320</sup> | 2020-03-26 to 2020-03-27 | England   London | Regional         | Moderate             | 757         | >16 | NR         | Probability     | Blood donors                    | 2.6% (1.1-4.4%)                                      | EUROIMMUN   Euroimmun Anti-SARS-                      | 82.5%, 99.1% (Used author-adjusted estimate) | 2.6% (1.6-3.8%)                                  |

| Article Author (Study Organization)                        | Sampling Dates (YMD)     | Location       | Geographic Scope | Overall Risk of Bias | Sample Size | Age                                                                                                                      | Female (%) | Sampling method | Sample frame                    | Uncorrected Seroprevalence (95% Confidence Interval) | Test Manufacturers   Isotypes                                 | Test Sens, Spec (Source)                                                             | Corrected Seroprevalence (95% Credible Interval) |
|------------------------------------------------------------|--------------------------|----------------|------------------|----------------------|-------------|--------------------------------------------------------------------------------------------------------------------------|------------|-----------------|---------------------------------|------------------------------------------------------|---------------------------------------------------------------|--------------------------------------------------------------------------------------|--------------------------------------------------|
|                                                            |                          |                |                  |                      |             |                                                                                                                          |            |                 |                                 |                                                      | CoV-2 ELISA IgG   IgG                                         |                                                                                      |                                                  |
| <b>United States of America</b>                            |                          |                |                  |                      |             |                                                                                                                          |            |                 |                                 |                                                      |                                                               |                                                                                      |                                                  |
| Maleck (University of Wisconsin) <sup>325</sup>            | 2020-10-18 to 2020-12-14 | Wisconsin      | Regional         | Moderate             | 994         | NR                                                                                                                       | NR         | Probability     | Household and community samples | 6.8% (4.3-9.4%)                                      | Abbott   Abbott Architect SARS-CoV- 2 IgG antibody test   IgG | 0.0%, 99.6% (Used author-adjusted estimate)                                          | 6.8% (5.3-8.4%)                                  |
| Craver (Wake Forest Baptist Medical Center) <sup>326</sup> | 2020-04-15 to 2020-12-09 | North Carolina | Regional         | Unclear              | 8006        | 16-95                                                                                                                    | NR         | Probability     | Household and community samples | 9.3%                                                 | NR   NR   NR                                                  | 66.0%, 96.6% (Used Bastos SR/MA data; no sens, spec, or author adjustment available) | 9.4% (8.0-10.8%)                                 |
| Stout (Clinical Reference Laboratory Inc.) <sup>327</sup>  | 2020-05-12 to 2020-12-06 |                | National         | High                 | 126587      | Median 44 (SARS-CoV-2 Negative); 41 (SARS-CoV-2 Positive) (IQR 34-54 (SARS-CoV-2 Negative); 32-50 (SARS-CoV-2 Positive)) | 44.8       | Non-probability | Residual sera                   | 5.9%                                                 | Roche   Roche Elecsys Anti-SARS-CoV-2 Kit   NR                | 0.9%, 1.0% (FINDDx / MUHC independent evaluation)                                    | -                                                |
| Jolley (Florida Department of Health) <sup>328</sup>       | 2020-05-01 to 2020-11-30 | Florida        | Regional         | Unclear              | 630838      | NR                                                                                                                       | NR         | Non-probability | Household and community samples | 11.0%                                                | NR   NR   IgG                                                 | No data                                                                              | -                                                |
| Coffman (University of Louisville ) <sup>329</sup>         | 2020-11-09 to 2020-11-16 | Kentucky       | Local            | Unclear              | 1091        | NR                                                                                                                       | NR         | Probability     | Household and community samples | 2.0%                                                 | NR   NR   NR                                                  | No data                                                                              | -                                                |
| Coffman (University of Louisville ) <sup>329</sup>         | 2020-11-09 to 2020-11-16 | Kentucky       | Local            | Unclear              | 1709        | NR                                                                                                                       | NR         | Non-probability | Household and community samples | 3.3%                                                 | NR   NR   NR                                                  | No data                                                                              | -                                                |
| Bajema (CDC COVID-19 Response) <sup>331</sup>              | 2020-09-09 to 2020-09-24 | Delaware       | Regional         | Moderate             | 980         | 0-17 (n=6612); 18-49 (n=15157); 50-                                                                                      | NR         | Non-probability | Residual sera                   | 7.5% (4.9-10.5%)                                     | Ortho-Clinical Diagnostics; Abbott; Roche   Elecsys Anti-     | 0.0%, 0.0% (Used author-adjusted estimate)                                           | 7.5% (5.9-9.2%)                                  |

| Article Author (Study Organization)           | Sampling Dates (YMD)     | Location | Geographic Scope | Overall Risk of Bias | Sample Size | Age                                                                     | Female (%) | Sampling method | Sample frame  | Uncorrected Seroprevalence (95% Confidence Interval) | Test Manufacturers   Names   Isotypes                                                                                                                                               | Test Sens, Spec (Source)                   | Corrected Seroprevalence (95% Credible Interval) |
|-----------------------------------------------|--------------------------|----------|------------------|----------------------|-------------|-------------------------------------------------------------------------|------------|-----------------|---------------|------------------------------------------------------|-------------------------------------------------------------------------------------------------------------------------------------------------------------------------------------|--------------------------------------------|--------------------------------------------------|
|                                               |                          |          |                  |                      |             | 64 (n=13207);<br>≥65 (n=12933)                                          |            |                 |               |                                                      | SARS-CoV-2 pan-immunoglobulin immunoassay, ARCHITECT SARS-CoV-2 IgG immunoassay, VIT- ROS SARS-CoV-2 IgG immunoassay   IgG                                                          |                                            |                                                  |
| Bajema (CDC COVID-19 Response) <sup>331</sup> | 2020-09-09 to 2020-09-24 | Iowa     | Regional         | Moderate             | 977         | 0-17 (n=6612);<br>18-49 (n=15157);<br>50-64 (n=13207);<br>≥65 (n=12933) | NR         | Non-probability | Residual sera | 7.6% (5.6-10.0%)                                     | Ortho-Clinical Diagnostics; Abbott; Roche   Elecsys Anti-SARS-CoV-2 pan-immunoglobulin immunoassay, ARCHITECT SARS-CoV-2 IgG immunoassay, VIT- ROS SARS-CoV-2 IgG immunoassay   IgG | 0.0%, 0.0% (Used author-adjusted estimate) | 7.6% (6.0-9.4%)                                  |
| Bajema (CDC COVID-19 Response) <sup>331</sup> | 2020-09-08 to 2020-09-24 | Maine    | Regional         | Moderate             | 987         | 0-17 (n=6612);<br>18-49 (n=15157);<br>50-64 (n=13207);<br>≥65 (n=12933) | NR         | Non-probability | Residual sera | 0.5% (0.1-0.9%)                                      | Ortho-Clinical Diagnostics; Abbott; Roche   Elecsys Anti-SARS-CoV-2 pan-immunoglobulin immunoassay, ARCHITECT SARS-CoV-2 IgG immunoassay, VIT- ROS SARS-CoV-2 IgG immunoassay   IgG | 0.0%, 0.0% (Used author-adjusted estimate) | 0.5% (0.1-1.0%)                                  |

| Article Author (Study Organization)           | Sampling Dates (YMD)     | Location   | Geographic Scope | Overall Risk of Bias | Sample Size | Age                                                            | Female (%) | Sampling method | Sample frame  | Uncorrected Seroprevalence (95% Confidence Interval) | Test Manufacturers   Names   Isotypes                                                                                                                                              | Test Sens, Spec (Source)                   | Corrected Seroprevalence (95% Credible Interval) |
|-----------------------------------------------|--------------------------|------------|------------------|----------------------|-------------|----------------------------------------------------------------|------------|-----------------|---------------|------------------------------------------------------|------------------------------------------------------------------------------------------------------------------------------------------------------------------------------------|--------------------------------------------|--------------------------------------------------|
| Bajema (CDC COVID-19 Response) <sup>331</sup> | 2020-09-08 to 2020-09-24 | Missouri   | Regional         | Moderate             | 1031        | 0-17 (n=6612); 18-49 (n=15157); 50-64 (n=13207); ≥65 (n=12933) | NR         | Non-probability | Residual sera | 3.5% (2.1-5.0%)                                      | Ortho-Clinical Diagnostics; Abbott; Roche   Elecsys Anti-SARS-CoV-2 pan-immunoglobulin immunoassay, ARCHITECT SARS-CoV-2 IgG immunoassay, VIT-ROS SARS-CoV-2 IgG immunoassay   IgG | 0.0%, 0.0% (Used author-adjusted estimate) | 3.5% (2.5-4.7%)                                  |
| Bajema (CDC COVID-19 Response) <sup>331</sup> | 2020-09-08 to 2020-09-24 | New Mexico | Regional         | Moderate             | 1014        | 0-17 (n=6612); 18-49 (n=15157); 50-64 (n=13207); ≥65 (n=12933) | NR         | Non-probability | Residual sera | 2.4% (1.2-3.6%)                                      | Ortho-Clinical Diagnostics; Abbott; Roche   Elecsys Anti-SARS-CoV-2 pan-immunoglobulin immunoassay, ARCHITECT SARS-CoV-2 IgG immunoassay, VIT-ROS SARS-CoV-2 IgG immunoassay   IgG | 0.0%, 0.0% (Used author-adjusted estimate) | 2.4% (1.6-3.4%)                                  |
| Bajema (CDC COVID-19 Response) <sup>331</sup> | 2020-09-11 to 2020-09-24 | New York   | Regional         | Moderate             | 1168        | 0-17 (n=6612); 18-49 (n=15157); 50-64 (n=13207); ≥65 (n=12933) | NR         | Non-probability | Residual sera | 17.0% (14.7-19.2%)                                   | Ortho-Clinical Diagnostics; Abbott; Roche   Elecsys Anti-SARS-CoV-2 pan-immunoglobulin immunoassay, ARCHITECT SARS-CoV-2 IgG immunoassay, VIT-ROS SARS-CoV-2 IgG                   | 0.0%, 0.0% (Used author-adjusted estimate) | 17.0% (14.9-19.2%)                               |

| Article Author (Study Organization)           | Sampling Dates (YMD)     | Location     | Geographic Scope | Overall Risk of Bias | Sample Size | Age                                                            | Female (%) | Sampling method | Sample frame  | Uncorrected Seroprevalence (95% Confidence Interval) | Test Manufacturers   Names   Isotypes                                                                                                                                              | Test Sens, Spec (Source)                   | Corrected Seroprevalence (95% Credible Interval) |
|-----------------------------------------------|--------------------------|--------------|------------------|----------------------|-------------|----------------------------------------------------------------|------------|-----------------|---------------|------------------------------------------------------|------------------------------------------------------------------------------------------------------------------------------------------------------------------------------------|--------------------------------------------|--------------------------------------------------|
|                                               |                          |              |                  |                      |             |                                                                |            |                 |               |                                                      | immunoassay   IgG                                                                                                                                                                  |                                            |                                                  |
| Bajema (CDC COVID-19 Response) <sup>331</sup> | 2020-09-09 to 2020-09-24 | North Dakota | Regional         | High                 | 113         | 0-17 (n=6612); 18-49 (n=15157); 50-64 (n=13207); ≥65 (n=12933) | NR         | Non-probability | Residual sera | 1.2% (0.0-3.4%)                                      | Ortho-Clinical Diagnostics; Abbott; Roche   Elecsys Anti-SARS-CoV-2 pan-immunoglobulin immunoassay, ARCHITECT SARS-CoV-2 IgG immunoassay, VIT-ROS SARS-CoV-2 IgG immunoassay   IgG | 0.0%, 0.0% (Used author-adjusted estimate) | 1.2% (0.1-4.1%)                                  |
| Bajema (CDC COVID-19 Response) <sup>331</sup> | 2020-09-09 to 2020-09-24 | Rhode Island | Regional         | Moderate             | 795         | 0-17 (n=6612); 18-49 (n=15157); 50-64 (n=13207); ≥65 (n=12933) | NR         | Non-probability | Residual sera | 2.7% (1.1-4.9%)                                      | Ortho-Clinical Diagnostics; Abbott; Roche   Elecsys Anti-SARS-CoV-2 pan-immunoglobulin immunoassay, ARCHITECT SARS-CoV-2 IgG immunoassay, VIT-ROS SARS-CoV-2 IgG immunoassay   IgG | 0.0%, 0.0% (Used author-adjusted estimate) | 2.7% (1.7-3.9%)                                  |
| Bajema (CDC COVID-19 Response) <sup>331</sup> | 2020-09-09 to 2020-09-24 | Texas        | Regional         | Moderate             | 988         | 0-17 (n=6612); 18-49 (n=15157); 50-64 (n=13207); ≥65 (n=12933) | NR         | Non-probability | Residual sera | 8.2% (6.2-10.5%)                                     | Ortho-Clinical Diagnostics; Abbott; Roche   Elecsys Anti-SARS-CoV-2 pan-immunoglobulin immunoassay, ARCHITECT SARS-CoV-2 IgG                                                       | 0.0%, 0.0% (Used author-adjusted estimate) | 8.2% (6.6-10.0%)                                 |

| Article Author (Study Organization)           | Sampling Dates (YMD)     | Location       | Geographic Scope | Overall Risk of Bias | Sample Size | Age                                                            | Female (%) | Sampling method | Sample frame  | Uncorrected Seroprevalence (95% Confidence Interval) | Test Manufacturers   Isotypes                                                                                                                                                       | Test Sens, Spec (Source)                   | Corrected Seroprevalence (95% Credible Interval) |
|-----------------------------------------------|--------------------------|----------------|------------------|----------------------|-------------|----------------------------------------------------------------|------------|-----------------|---------------|------------------------------------------------------|-------------------------------------------------------------------------------------------------------------------------------------------------------------------------------------|--------------------------------------------|--------------------------------------------------|
|                                               |                          |                |                  |                      |             |                                                                |            |                 |               |                                                      | immunoassay, VIT- ROS SARS-CoV-2 IgG<br>immunoassay   IgG                                                                                                                           |                                            |                                                  |
| Bajema (CDC COVID-19 Response) <sup>331</sup> | 2020-09-09 to 2020-09-24 | Vermont        | Regional         | High                 | 497         | 0-17 (n=6612); 18-49 (n=15157); 50-64 (n=13207); ≥65 (n=12933) | NR         | Non-probability | Residual sera | 1.7% (0.3-4.2%)                                      | Ortho-Clinical Diagnostics; Abbott; Roche   Elecsys Anti-SARS-CoV-2 pan-immunoglobulin immunoassay, ARCHITECT SARS-CoV-2 IgG immunoassay, VIT- ROS SARS-CoV-2 IgG immunoassay   IgG | 0.0%, 0.0% (Used author-adjusted estimate) | 1.7% (0.8-3.0%)                                  |
| Bajema (CDC COVID-19 Response) <sup>331</sup> | 2020-09-08 to 2020-09-24 | Washington D.C | Regional         | Moderate             | 976         | 0-17 (n=6612); 18-49 (n=15157); 50-64 (n=13207); ≥65 (n=12933) | NR         | Non-probability | Residual sera | 6.5% (4.5-8.3%)                                      | Ortho-Clinical Diagnostics; Abbott; Roche   Elecsys Anti-SARS-CoV-2 pan-immunoglobulin immunoassay, ARCHITECT SARS-CoV-2 IgG immunoassay, VIT- ROS SARS-CoV-2 IgG immunoassay   IgG | 0.0%, 0.0% (Used author-adjusted estimate) | 6.5% (5.0-8.1%)                                  |
| Bajema (CDC COVID-19 Response) <sup>331</sup> | 2020-09-09 to 2020-09-24 | Wisconsin      | Regional         | Moderate             | 976         | 0-17 (n=6612); 18-49 (n=15157); 50-64 (n=13207); ≥65 (n=12933) | NR         | Non-probability | Residual sera | 3.8% (2.2-5.7%)                                      | Ortho-Clinical Diagnostics; Abbott; Roche   Elecsys Anti-SARS-CoV-2 pan-immunoglobulin                                                                                              | 0.0%, 0.0% (Used author-adjusted estimate) | 3.8% (2.7-5.1%)                                  |

| Article Author (Study Organization)           | Sampling Dates (YMD)     | Location | Geographic Scope | Overall Risk of Bias | Sample Size | Age                                                            | Female (%) | Sampling method | Sample frame  | Uncorrected Seroprevalence (95% Confidence Interval) | Test Manufacturers   Names   Isotypes                                                                                                                                               | Test Sens, Spec (Source)                   | Corrected Seroprevalence (95% Credible Interval) |
|-----------------------------------------------|--------------------------|----------|------------------|----------------------|-------------|----------------------------------------------------------------|------------|-----------------|---------------|------------------------------------------------------|-------------------------------------------------------------------------------------------------------------------------------------------------------------------------------------|--------------------------------------------|--------------------------------------------------|
|                                               |                          |          |                  |                      |             |                                                                |            |                 |               |                                                      | immunoassay, ARCHITECT SARS-CoV-2 IgG<br>immunoassay, VIT- ROS SARS-CoV-2 IgG<br>immunoassay   IgG                                                                                  |                                            |                                                  |
| Bajema (CDC COVID-19 Response) <sup>331</sup> | 2020-09-09 to 2020-09-24 | Wyoming  | Regional         | High                 | 111         | 0-17 (n=6612); 18-49 (n=15157); 50-64 (n=13207); ≥65 (n=12933) | NR         | Non-probability | Residual sera | 1.5% (0.0-4.0%)                                      | Ortho-Clinical Diagnostics; Abbott; Roche   Elecsys Anti-SARS-CoV-2 pan-immunoglobulin immunoassay, ARCHITECT SARS-CoV-2 IgG immunoassay, VIT- ROS SARS-CoV-2 IgG immunoassay   IgG | 0.0%, 0.0% (Used author-adjusted estimate) | 1.5% (0.1-4.1%)                                  |
| Bajema (CDC COVID-19 Response) <sup>331</sup> | 2020-09-09 to 2020-09-23 | Arizona  | Regional         | Moderate             | 1208        | 0-17 (n=6612); 18-49 (n=15157); 50-64 (n=13207); ≥65 (n=12933) | NR         | Non-probability | Residual sera | 5.4% (3.1-8.5%)                                      | Ortho-Clinical Diagnostics; Abbott; Roche   Elecsys Anti-SARS-CoV-2 pan-immunoglobulin immunoassay, ARCHITECT SARS-CoV-2 IgG immunoassay, VIT- ROS SARS-CoV-2 IgG immunoassay   IgG | 0.0%, 0.0% (Used author-adjusted estimate) | 5.4% (4.2-6.8%)                                  |
| Bajema (CDC COVID-19 Response) <sup>331</sup> | 2020-09-09 to 2020-09-23 | Indiana  | Regional         | Moderate             | 1155        | 0-17 (n=6612); 18-49 (n=15157); 50-                            | NR         | Non-probability | Residual sera | 4.0% (1.4-8.8%)                                      | Ortho-Clinical Diagnostics; Abbott; Roche   Elecsys Anti-                                                                                                                           | 0.0%, 0.0% (Used author-adjusted estimate) | 4.0% (3.0-5.2%)                                  |



| Article Author (Study Organization)           | Sampling Dates (YMD)     | Location  | Geographic Scope | Overall Risk of Bias | Sample Size | Age                                                                     | Female (%) | Sampling method | Sample frame  | Uncorrected Seroprevalence (95% Confidence Interval) | Test Manufacturers   Names   Isotypes                                                                                                                                               | Test Sens, Spec (Source)                   | Corrected Seroprevalence (95% Credible Interval) |
|-----------------------------------------------|--------------------------|-----------|------------------|----------------------|-------------|-------------------------------------------------------------------------|------------|-----------------|---------------|------------------------------------------------------|-------------------------------------------------------------------------------------------------------------------------------------------------------------------------------------|--------------------------------------------|--------------------------------------------------|
|                                               |                          |           |                  |                      |             | 64 (n=13207);<br>≥65 (n=12933)                                          |            |                 |               |                                                      | SARS-CoV-2 pan-immunoglobulin immunoassay, ARCHITECT SARS-CoV-2 IgG immunoassay, VIT- ROS SARS-CoV-2 IgG immunoassay   IgG                                                          |                                            |                                                  |
| Bajema (CDC COVID-19 Response) <sup>331</sup> | 2020-09-10 to 2020-09-23 | Maryland  | Regional         | Moderate             | 1242        | 0-17 (n=6612);<br>18-49 (n=15157);<br>50-64 (n=13207);<br>≥65 (n=12933) | NR         | Non-probability | Residual sera | 10.2% (7.9-12.7%)                                    | Ortho-Clinical Diagnostics; Abbott; Roche   Elecsys Anti-SARS-CoV-2 pan-immunoglobulin immunoassay, ARCHITECT SARS-CoV-2 IgG immunoassay, VIT- ROS SARS-CoV-2 IgG immunoassay   IgG | 0.0%, 0.0% (Used author-adjusted estimate) | 10.2% (8.6-11.9%)                                |
| Bajema (CDC COVID-19 Response) <sup>331</sup> | 2020-09-09 to 2020-09-23 | Minnesota | Regional         | Moderate             | 1033        | 0-17 (n=6612);<br>18-49 (n=15157);<br>50-64 (n=13207);<br>≥65 (n=12933) | NR         | Non-probability | Residual sera | 8.0% (4.7-11.4%)                                     | Ortho-Clinical Diagnostics; Abbott; Roche   Elecsys Anti-SARS-CoV-2 pan-immunoglobulin immunoassay, ARCHITECT SARS-CoV-2 IgG immunoassay, VIT- ROS SARS-CoV-2 IgG immunoassay   IgG | 0.0%, 0.0% (Used author-adjusted estimate) | 8.0% (6.4-9.7%)                                  |

| Article Author (Study Organization)           | Sampling Dates (YMD)     | Location     | Geographic Scope | Overall Risk of Bias | Sample Size | Age                                                            | Female (%) | Sampling method | Sample frame  | Uncorrected Seroprevalence (95% Confidence Interval) | Test Manufacturers   Names   Isotypes                                                                                                                                              | Test Sens, Spec (Source)                   | Corrected Seroprevalence (95% Credible Interval) |
|-----------------------------------------------|--------------------------|--------------|------------------|----------------------|-------------|----------------------------------------------------------------|------------|-----------------|---------------|------------------------------------------------------|------------------------------------------------------------------------------------------------------------------------------------------------------------------------------------|--------------------------------------------|--------------------------------------------------|
| Bajema (CDC COVID-19 Response) <sup>331</sup> | 2020-09-09 to 2020-09-23 | Montana      | Regional         | High                 | 508         | 0-17 (n=6612); 18-49 (n=15157); 50-64 (n=13207); ≥65 (n=12933) | NR         | Non-probability | Residual sera | 2.2% (0.7-4.4%)                                      | Ortho-Clinical Diagnostics; Abbott; Roche   Elecsys Anti-SARS-CoV-2 pan-immunoglobulin immunoassay, ARCHITECT SARS-CoV-2 IgG immunoassay, VIT-ROS SARS-CoV-2 IgG immunoassay   IgG | 0.0%, 0.0% (Used author-adjusted estimate) | 2.2% (1.2-3.7%)                                  |
| Bajema (CDC COVID-19 Response) <sup>331</sup> | 2020-09-09 to 2020-09-23 | New Jersey   | Regional         | Moderate             | 1050        | 0-17 (n=6612); 18-49 (n=15157); 50-64 (n=13207); ≥65 (n=12933) | NR         | Non-probability | Residual sera | 15.1% (12.7-17.6%)                                   | Ortho-Clinical Diagnostics; Abbott; Roche   Elecsys Anti-SARS-CoV-2 pan-immunoglobulin immunoassay, ARCHITECT SARS-CoV-2 IgG immunoassay, VIT-ROS SARS-CoV-2 IgG immunoassay   IgG | 0.0%, 0.0% (Used author-adjusted estimate) | 15.1% (13.0-17.3%)                               |
| Bajema (CDC COVID-19 Response) <sup>331</sup> | 2020-09-09 to 2020-09-23 | Pennsylvania | Regional         | Moderate             | 1341        | 0-17 (n=6612); 18-49 (n=15157); 50-64 (n=13207); ≥65 (n=12933) | NR         | Non-probability | Residual sera | 11.1% (8.8-13.7%)                                    | Ortho-Clinical Diagnostics; Abbott; Roche   Elecsys Anti-SARS-CoV-2 pan-immunoglobulin immunoassay, ARCHITECT SARS-CoV-2 IgG immunoassay, VIT-ROS SARS-CoV-2 IgG                   | 0.0%, 0.0% (Used author-adjusted estimate) | 11.1% (9.4-12.8%)                                |

| Article Author (Study Organization)           | Sampling Dates (YMD)     | Location     | Geographic Scope | Overall Risk of Bias | Sample Size | Age                                                            | Female (%) | Sampling method | Sample frame  | Uncorrected Seroprevalence (95% Confidence Interval) | Test Manufacturers   Names   Isotypes                                                                                                                                              | Test Sens, Spec (Source)                   | Corrected Seroprevalence (95% Credible Interval) |
|-----------------------------------------------|--------------------------|--------------|------------------|----------------------|-------------|----------------------------------------------------------------|------------|-----------------|---------------|------------------------------------------------------|------------------------------------------------------------------------------------------------------------------------------------------------------------------------------------|--------------------------------------------|--------------------------------------------------|
|                                               |                          |              |                  |                      |             |                                                                |            |                 |               |                                                      | immunoassay   IgG                                                                                                                                                                  |                                            |                                                  |
| Bajema (CDC COVID-19 Response) <sup>331</sup> | 2020-09-09 to 2020-09-23 | South Dakota | Regional         | High                 | 99          | 0-17 (n=6612); 18-49 (n=15157); 50-64 (n=13207); ≥65 (n=12933) | NR         | Non-probability | Residual sera | 1.8% (0.0-4.8%)                                      | Ortho-Clinical Diagnostics; Abbott; Roche   Elecsys Anti-SARS-CoV-2 pan-immunoglobulin immunoassay, ARCHITECT SARS-CoV-2 IgG immunoassay, VIT-ROS SARS-CoV-2 IgG immunoassay   IgG | 0.0%, 0.0% (Used author-adjusted estimate) | 1.8% (0.1-4.6%)                                  |
| Bajema (CDC COVID-19 Response) <sup>331</sup> | 2020-09-10 to 2020-09-23 | Virginia     | Regional         | Moderate             | 1111        | 0-17 (n=6612); 18-49 (n=15157); 50-64 (n=13207); ≥65 (n=12933) | NR         | Non-probability | Residual sera | 3.2% (1.8-5.1%)                                      | Ortho-Clinical Diagnostics; Abbott; Roche   Elecsys Anti-SARS-CoV-2 pan-immunoglobulin immunoassay, ARCHITECT SARS-CoV-2 IgG immunoassay, VIT-ROS SARS-CoV-2 IgG immunoassay   IgG | 0.0%, 0.0% (Used author-adjusted estimate) | 3.2% (2.2-4.3%)                                  |
| Bajema (CDC COVID-19 Response) <sup>331</sup> | 2020-09-08 to 2020-09-22 | Hawaii       | Regional         | High                 | 516         | 0-17 (n=6612); 18-49 (n=15157); 50-64 (n=13207); ≥65 (n=12933) | NR         | Non-probability | Residual sera | 0.8% (0.0-2.2%)                                      | Ortho-Clinical Diagnostics; Abbott; Roche   Elecsys Anti-SARS-CoV-2 pan-immunoglobulin immunoassay, ARCHITECT SARS-CoV-2 IgG                                                       | 0.0%, 0.0% (Used author-adjusted estimate) | 0.8% (0.3-1.8%)                                  |

| Article Author (Study Organization)           | Sampling Dates (YMD)     | Location    | Geographic Scope | Overall Risk of Bias | Sample Size | Age                                                            | Female (%) | Sampling method | Sample frame  | Uncorrected Seroprevalence (95% Confidence Interval) | Test Manufacturers   Isotypes                                                                                                                                                       | Test Sens, Spec (Source)                   | Corrected Seroprevalence (95% Credible Interval) |
|-----------------------------------------------|--------------------------|-------------|------------------|----------------------|-------------|----------------------------------------------------------------|------------|-----------------|---------------|------------------------------------------------------|-------------------------------------------------------------------------------------------------------------------------------------------------------------------------------------|--------------------------------------------|--------------------------------------------------|
|                                               |                          |             |                  |                      |             |                                                                |            |                 |               |                                                      | immunoassay, VIT- ROS SARS-CoV-2 IgG<br>immunoassay   IgG                                                                                                                           |                                            |                                                  |
| Bajema (CDC COVID-19 Response) <sup>331</sup> | 2020-09-08 to 2020-09-22 | Michigan    | Regional         | Moderate             | 980         | 0-17 (n=6612); 18-49 (n=15157); 50-64 (n=13207); ≥65 (n=12933) | NR         | Non-probability | Residual sera | 3.7% (2.5-4.9%)                                      | Ortho-Clinical Diagnostics; Abbott; Roche   Elecsys Anti-SARS-CoV-2 pan-immunoglobulin immunoassay, ARCHITECT SARS-CoV-2 IgG immunoassay, VIT- ROS SARS-CoV-2 IgG immunoassay   IgG | 0.0%, 0.0% (Used author-adjusted estimate) | 3.7% (2.6-5.0%)                                  |
| Bajema (CDC COVID-19 Response) <sup>331</sup> | 2020-09-09 to 2020-09-22 | Mississippi | Regional         | Moderate             | 980         | 0-17 (n=6612); 18-49 (n=15157); 50-64 (n=13207); ≥65 (n=12933) | NR         | Non-probability | Residual sera | 7.9% (5.3-10.9%)                                     | Ortho-Clinical Diagnostics; Abbott; Roche   Elecsys Anti-SARS-CoV-2 pan-immunoglobulin immunoassay, ARCHITECT SARS-CoV-2 IgG immunoassay, VIT- ROS SARS-CoV-2 IgG immunoassay   IgG | 0.0%, 0.0% (Used author-adjusted estimate) | 7.9% (6.3-9.7%)                                  |
| Bajema (CDC COVID-19 Response) <sup>331</sup> | 2020-09-10 to 2020-09-22 | Ohio        | Regional         | Moderate             | 978         | 0-17 (n=6612); 18-49 (n=15157); 50-64 (n=13207); ≥65 (n=12933) | NR         | Non-probability | Residual sera | 2.8% (1.7-4.2%)                                      | Ortho-Clinical Diagnostics; Abbott; Roche   Elecsys Anti-SARS-CoV-2 pan-immunoglobulin                                                                                              | 0.0%, 0.0% (Used author-adjusted estimate) | 2.8% (1.9-3.9%)                                  |

| Article Author (Study Organization)           | Sampling Dates (YMD)     | Location      | Geographic Scope | Overall Risk of Bias | Sample Size | Age                                                            | Female (%) | Sampling method | Sample frame  | Uncorrected Seroprevalence (95% Confidence Interval) | Test Manufacturers   Names   Isotypes                                                                                                                                               | Test Sens, Spec (Source)                   | Corrected Seroprevalence (95% Credible Interval) |
|-----------------------------------------------|--------------------------|---------------|------------------|----------------------|-------------|----------------------------------------------------------------|------------|-----------------|---------------|------------------------------------------------------|-------------------------------------------------------------------------------------------------------------------------------------------------------------------------------------|--------------------------------------------|--------------------------------------------------|
|                                               |                          |               |                  |                      |             |                                                                |            |                 |               |                                                      | immunoassay, ARCHITECT SARS-CoV-2 IgG<br>immunoassay, VIT- ROS SARS-CoV-2 IgG<br>immunoassay   IgG                                                                                  |                                            |                                                  |
| Bajema (CDC COVID-19 Response) <sup>331</sup> | 2020-09-08 to 2020-09-22 | Oregon        | Regional         | Moderate             | 971         | 0-17 (n=6612); 18-49 (n=15157); 50-64 (n=13207); ≥65 (n=12933) | NR         | Non-probability | Residual sera | 2.6% (1.5-4.1%)                                      | Ortho-Clinical Diagnostics; Abbott; Roche   Elecsys Anti-SARS-CoV-2 pan-immunoglobulin immunoassay, ARCHITECT SARS-CoV-2 IgG immunoassay, VIT- ROS SARS-CoV-2 IgG immunoassay   IgG | 0.0%, 0.0% (Used author-adjusted estimate) | 2.6% (1.7-3.7%)                                  |
| Bajema (CDC COVID-19 Response) <sup>331</sup> | 2020-09-09 to 2020-09-22 | Washington    | Regional         | Moderate             | 968         | 0-17 (n=6612); 18-49 (n=15157); 50-64 (n=13207); ≥65 (n=12933) | NR         | Non-probability | Residual sera | 2.5% (1.3-3.8%)                                      | Ortho-Clinical Diagnostics; Abbott; Roche   Elecsys Anti-SARS-CoV-2 pan-immunoglobulin immunoassay, ARCHITECT SARS-CoV-2 IgG immunoassay, VIT- ROS SARS-CoV-2 IgG immunoassay   IgG | 0.0%, 0.0% (Used author-adjusted estimate) | 2.5% (1.6-3.6%)                                  |
| Bajema (CDC COVID-19 Response) <sup>331</sup> | 2020-09-09 to 2020-09-22 | West Virginia | Regional         | Moderate             | 968         | 0-17 (n=6612); 18-49 (n=15157); 50-                            | NR         | Non-probability | Residual sera | 1.3% (0.5-2.2%)                                      | Ortho-Clinical Diagnostics; Abbott; Roche   Elecsys Anti-                                                                                                                           | 0.0%, 0.0% (Used author-adjusted estimate) | 1.3% (0.7-2.1%)                                  |

| Article Author (Study Organization)                                               | Sampling Dates (YMD)     | Location  | Geographic Scope | Overall Risk of Bias | Sample Size | Age                                                            | Female (%) | Sampling method | Sample frame                    | Uncorrected Seroprevalence (95% Confidence Interval) | Test Manufacturers   Names   Isotypes                                                                                                                                               | Test Sens, Spec (Source)                   | Corrected Seroprevalence (95% Credible Interval) |
|-----------------------------------------------------------------------------------|--------------------------|-----------|------------------|----------------------|-------------|----------------------------------------------------------------|------------|-----------------|---------------------------------|------------------------------------------------------|-------------------------------------------------------------------------------------------------------------------------------------------------------------------------------------|--------------------------------------------|--------------------------------------------------|
|                                                                                   |                          |           |                  |                      |             | 64 (n=13207); ≥65 (n=12933)                                    |            |                 |                                 |                                                      | SARS-CoV-2 pan-immunoglobulin immunoassay, ARCHITECT SARS-CoV-2 IgG immunoassay, VIT- ROS SARS-CoV-2 IgG immunoassay   IgG                                                          |                                            |                                                  |
| Fountain Hills Times (Maricopa County Department of Public Health) <sup>332</sup> | 2020-09-11 to 2020-09-21 | Arizona   | Local            | Unclear              | 260         | NR                                                             | NR         | Probability     | Household and community samples | 10.7%                                                | NR   NR   NR                                                                                                                                                                        | No data                                    | -                                                |
| Bajema (CDC COVID-19 Response) <sup>331</sup>                                     | 2020-09-09 to 2020-09-19 | Kansas    | Regional         | Moderate             | 1007        | 0-17 (n=6612); 18-49 (n=15157); 50-64 (n=13207); ≥65 (n=12933) | NR         | Non-probability | Residual sera                   | 3.5% (2.3-4.8%)                                      | Ortho-Clinical Diagnostics; Abbott; Roche   Elecsys Anti-SARS-CoV-2 pan-immunoglobulin immunoassay, ARCHITECT SARS-CoV-2 IgG immunoassay, VIT- ROS SARS-CoV-2 IgG immunoassay   IgG | 0.0%, 0.0% (Used author-adjusted estimate) | 3.5% (2.5-4.7%)                                  |
| Bajema (CDC COVID-19 Response) <sup>331</sup>                                     | 2020-09-09 to 2020-09-19 | Louisiana | Regional         | Moderate             | 952         | 0-17 (n=6612); 18-49 (n=15157); 50-64 (n=13207); ≥65 (n=12933) | NR         | Non-probability | Residual sera                   | 12.5% (10.0-15.6%)                                   | Ortho-Clinical Diagnostics; Abbott; Roche   Elecsys Anti-SARS-CoV-2 pan-immunoglobulin immunoassay, ARCHITECT SARS-CoV-2                                                            | 0.0%, 0.0% (Used author-adjusted estimate) | 12.5% (10.5-14.7%)                               |

| Article Author (Study Organization)           | Sampling Dates (YMD)     | Location | Geographic Scope | Overall Risk of Bias | Sample Size | Age                                                            | Female (%) | Sampling method | Sample frame  | Uncorrected Seroprevalence (95% Confidence Interval) | Test Manufacturers   Names   Isotypes                                                                                                                                               | Test Sens, Spec (Source)                   | Corrected Seroprevalence (95% Credible Interval) |
|-----------------------------------------------|--------------------------|----------|------------------|----------------------|-------------|----------------------------------------------------------------|------------|-----------------|---------------|------------------------------------------------------|-------------------------------------------------------------------------------------------------------------------------------------------------------------------------------------|--------------------------------------------|--------------------------------------------------|
|                                               |                          |          |                  |                      |             |                                                                |            |                 |               |                                                      | IgG immunoassay, VIT- ROS SARS-CoV-2 IgG immunoassay   IgG                                                                                                                          |                                            |                                                  |
| Bajema (CDC COVID-19 Response) <sup>331</sup> | 2020-09-09 to 2020-09-18 | Alabama  | Regional         | Moderate             | 905         | 0-17 (n=6612); 18-49 (n=15157); 50-64 (n=13207); ≥65 (n=12933) | NR         | Non-probability | Residual sera | 8.7% (6.2-11.3%)                                     | Ortho-Clinical Diagnostics; Abbott; Roche   Elecsys Anti-SARS-CoV-2 pan-immunoglobulin immunoassay, ARCHITECT SARS-CoV-2 IgG immunoassay, VIT- ROS SARS-CoV-2 IgG immunoassay   IgG | 0.0%, 0.0% (Used author-adjusted estimate) | 8.7% (6.9-10.6%)                                 |
| Bajema (CDC COVID-19 Response) <sup>331</sup> | 2020-09-09 to 2020-09-18 | Alaska   | Regional         | Moderate             | 681         | 0-17 (n=6612); 18-49 (n=15157); 50-64 (n=13207); ≥65 (n=12933) | NR         | Non-probability | Residual sera | 0.4% (0.1-0.8%)                                      | Ortho-Clinical Diagnostics; Abbott; Roche   Elecsys Anti-SARS-CoV-2 pan-immunoglobulin immunoassay, ARCHITECT SARS-CoV-2 IgG immunoassay, VIT- ROS SARS-CoV-2 IgG immunoassay   IgG | 0.0%, 0.0% (Used author-adjusted estimate) | 0.4% (0.1-0.9%)                                  |
| Bajema (CDC COVID-19 Response) <sup>331</sup> | 2020-09-09 to 2020-09-18 | Arkansas | Regional         | Moderate             | 990         | 0-17 (n=6612); 18-49 (n=15157); 50-64 (n=13207); ≥65 (n=12933) | NR         | Non-probability | Residual sera | 6.3% (4.6-8.0%)                                      | Ortho-Clinical Diagnostics; Abbott; Roche   Elecsys Anti-SARS-CoV-2 pan-immunoglobulin                                                                                              | 0.0%, 0.0% (Used author-adjusted estimate) | 6.3% (4.9-7.9%)                                  |

| Article Author (Study Organization)           | Sampling Dates (YMD)     | Location | Geographic Scope | Overall Risk of Bias | Sample Size | Age                                                            | Female (%) | Sampling method | Sample frame  | Uncorrected Seroprevalence (95% Confidence Interval) | Test Manufacturers   Names   Isotypes                                                                                                                                               | Test Sens, Spec (Source)                   | Corrected Seroprevalence (95% Credible Interval) |
|-----------------------------------------------|--------------------------|----------|------------------|----------------------|-------------|----------------------------------------------------------------|------------|-----------------|---------------|------------------------------------------------------|-------------------------------------------------------------------------------------------------------------------------------------------------------------------------------------|--------------------------------------------|--------------------------------------------------|
|                                               |                          |          |                  |                      |             |                                                                |            |                 |               |                                                      | n immunoassay, ARCHITECT SARS-CoV-2 IgG immunoassay, VIT- ROS SARS-CoV-2 IgG immunoassay   IgG                                                                                      |                                            |                                                  |
| Bajema (CDC COVID-19 Response) <sup>331</sup> | 2020-09-09 to 2020-09-18 | Colorado | Regional         | Moderate             | 1032        | 0-17 (n=6612); 18-49 (n=15157); 50-64 (n=13207); ≥65 (n=12933) | NR         | Non-probability | Residual sera | 3.3% (1.9-4.9%)                                      | Ortho-Clinical Diagnostics; Abbott; Roche   Elecsys Anti-SARS-CoV-2 pan-immunoglobulin immunoassay, ARCHITECT SARS-CoV-2 IgG immunoassay, VIT- ROS SARS-CoV-2 IgG immunoassay   IgG | 0.0%, 0.0% (Used author-adjusted estimate) | 3.3% (2.3-4.5%)                                  |
| Bajema (CDC COVID-19 Response) <sup>331</sup> | 2020-09-09 to 2020-09-18 | Georgia  | Regional         | Moderate             | 1100        | 0-17 (n=6612); 18-49 (n=15157); 50-64 (n=13207); ≥65 (n=12933) | NR         | Non-probability | Residual sera | 13.0% (10.5-15.8%)                                   | Ortho-Clinical Diagnostics; Abbott; Roche   Elecsys Anti-SARS-CoV-2 pan-immunoglobulin immunoassay, ARCHITECT SARS-CoV-2 IgG immunoassay, VIT- ROS SARS-CoV-2 IgG immunoassay   IgG | 0.0%, 0.0% (Used author-adjusted estimate) | 13.0% (11.1-15.1%)                               |
| Bajema (CDC COVID-19 Response) <sup>331</sup> | 2020-09-08 to 2020-09-18 | Idaho    | Regional         | Moderate             | 732         | 0-17 (n=6612); 18-49 (n=15157); 50-                            | NR         | Non-probability | Residual sera | 5.2% (2.7-8.5%)                                      | Ortho-Clinical Diagnostics; Abbott; Roche                                                                                                                                           | 0.0%, 0.0% (Used author-                   | 5.2% (3.8-7.0%)                                  |



| Article Author (Study Organization)           | Sampling Dates (YMD)     | Location | Geographic Scope | Overall Risk of Bias | Sample Size | Age                                                            | Female (%) | Sampling method | Sample frame  | Uncorrected Seroprevalence (95% Confidence Interval) | Test Manufacturers   Names   Isotypes                                                                                                                                               | Test Sens, Spec (Source)                   | Corrected Seroprevalence (95% Credible Interval) |
|-----------------------------------------------|--------------------------|----------|------------------|----------------------|-------------|----------------------------------------------------------------|------------|-----------------|---------------|------------------------------------------------------|-------------------------------------------------------------------------------------------------------------------------------------------------------------------------------------|--------------------------------------------|--------------------------------------------------|
|                                               |                          |          |                  |                      |             | 64 (n=13207); ≥65 (n=12933)                                    |            |                 |               |                                                      | Elecsys Anti-SARS-CoV-2 pan-immunoglobulin immunoassay, ARCHITECT SARS-CoV-2 IgG immunoassay, VIT- ROS SARS-CoV-2 IgG immunoassay   IgG                                             | adjusted estimate)                         |                                                  |
| Bajema (CDC COVID-19 Response) <sup>331</sup> | 2020-09-09 to 2020-09-18 | Kentucky | Regional         | Moderate             | 980         | 0-17 (n=6612); 18-49 (n=15157); 50-64 (n=13207); ≥65 (n=12933) | NR         | Non-probability | Residual sera | 3.6% (2.3-5.2%)                                      | Ortho-Clinical Diagnostics; Abbott; Roche   Elecsys Anti-SARS-CoV-2 pan-immunoglobulin immunoassay, ARCHITECT SARS-CoV-2 IgG immunoassay, VIT- ROS SARS-CoV-2 IgG immunoassay   IgG | 0.0%, 0.0% (Used author-adjusted estimate) | 3.6% (2.5-4.9%)                                  |
| Bajema (CDC COVID-19 Response) <sup>331</sup> | 2020-09-09 to 2020-09-18 | Nebraska | Regional         | Moderate             | 976         | 0-17 (n=6612); 18-49 (n=15157); 50-64 (n=13207); ≥65 (n=12933) | NR         | Non-probability | Residual sera | 6.7% (4.8-8.9%)                                      | Ortho-Clinical Diagnostics; Abbott; Roche   Elecsys Anti-SARS-CoV-2 pan-immunoglobulin immunoassay, ARCHITECT SARS-CoV-2 IgG immunoassay, VIT- ROS SARS-CoV-2 IgG immunoassay   IgG | 0.0%, 0.0% (Used author-adjusted estimate) | 6.7% (5.2-8.4%)                                  |

| Article Author (Study Organization)           | Sampling Dates (YMD)     | Location       | Geographic Scope | Overall Risk of Bias | Sample Size | Age                                                            | Female (%) | Sampling method | Sample frame  | Uncorrected Seroprevalence (95% Confidence Interval) | Test Manufacturers   Names   Isotypes                                                                                                                                              | Test Sens, Spec (Source)                   | Corrected Seroprevalence (95% Credible Interval) |
|-----------------------------------------------|--------------------------|----------------|------------------|----------------------|-------------|----------------------------------------------------------------|------------|-----------------|---------------|------------------------------------------------------|------------------------------------------------------------------------------------------------------------------------------------------------------------------------------------|--------------------------------------------|--------------------------------------------------|
| Bajema (CDC COVID-19 Response) <sup>331</sup> | 2020-09-09 to 2020-09-18 | Oklahoma       | Regional         | Moderate             | 980         | 0-17 (n=6612); 18-49 (n=15157); 50-64 (n=13207); ≥65 (n=12933) | NR         | Non-probability | Residual sera | 5.0% (3.4-6.5%)                                      | Ortho-Clinical Diagnostics; Abbott; Roche   Elecsys Anti-SARS-CoV-2 pan-immunoglobulin immunoassay, ARCHITECT SARS-CoV-2 IgG immunoassay, VIT-ROS SARS-CoV-2 IgG immunoassay   IgG | 0.0%, 0.0% (Used author-adjusted estimate) | 5.0% (3.8-6.5%)                                  |
| Bajema (CDC COVID-19 Response) <sup>331</sup> | 2020-09-09 to 2020-09-18 | South Carolina | Regional         | Moderate             | 975         | 0-17 (n=6612); 18-49 (n=15157); 50-64 (n=13207); ≥65 (n=12933) | NR         | Non-probability | Residual sera | 7.8% (5.6-10.2%)                                     | Ortho-Clinical Diagnostics; Abbott; Roche   Elecsys Anti-SARS-CoV-2 pan-immunoglobulin immunoassay, ARCHITECT SARS-CoV-2 IgG immunoassay, VIT-ROS SARS-CoV-2 IgG immunoassay   IgG | 0.0%, 0.0% (Used author-adjusted estimate) | 7.8% (6.2-9.6%)                                  |
| Bajema (CDC COVID-19 Response) <sup>331</sup> | 2020-09-09 to 2020-09-18 | Utah           | Regional         | Moderate             | 1022        | 0-17 (n=6612); 18-49 (n=15157); 50-64 (n=13207); ≥65 (n=12933) | NR         | Non-probability | Residual sera | 5.1% (3.3-7.9%)                                      | Ortho-Clinical Diagnostics; Abbott; Roche   Elecsys Anti-SARS-CoV-2 pan-immunoglobulin immunoassay, ARCHITECT SARS-CoV-2 IgG immunoassay, VIT-ROS SARS-CoV-2 IgG                   | 0.0%, 0.0% (Used author-adjusted estimate) | 5.1% (3.9-6.6%)                                  |

| Article Author (Study Organization)           | Sampling Dates (YMD)     | Location       | Geographic Scope | Overall Risk of Bias | Sample Size | Age                                                            | Female (%) | Sampling method | Sample frame  | Uncorrected Seroprevalence (95% Confidence Interval) | Test Manufacturers   Names   Isotypes                                                                                                                                              | Test Sens, Spec (Source)                   | Corrected Seroprevalence (95% Credible Interval) |
|-----------------------------------------------|--------------------------|----------------|------------------|----------------------|-------------|----------------------------------------------------------------|------------|-----------------|---------------|------------------------------------------------------|------------------------------------------------------------------------------------------------------------------------------------------------------------------------------------|--------------------------------------------|--------------------------------------------------|
|                                               |                          |                |                  |                      |             |                                                                |            |                 |               |                                                      | immunoassay   IgG                                                                                                                                                                  |                                            |                                                  |
| Bajema (CDC COVID-19 Response) <sup>331</sup> | 2020-09-08 to 2020-09-17 | Illinois       | Regional         | Moderate             | 992         | 0-17 (n=6612); 18-49 (n=15157); 50-64 (n=13207); ≥65 (n=12933) | NR         | Non-probability | Residual sera | 4.5% (3.1-6.1%)                                      | Ortho-Clinical Diagnostics; Abbott; Roche   Elecsys Anti-SARS-CoV-2 pan-immunoglobulin immunoassay, ARCHITECT SARS-CoV-2 IgG immunoassay, VIT-ROS SARS-CoV-2 IgG immunoassay   IgG | 0.0%, 0.0% (Used author-adjusted estimate) | 4.5% (3.3-5.9%)                                  |
| Bajema (CDC COVID-19 Response) <sup>331</sup> | 2020-09-09 to 2020-09-17 | New Hampshire  | Regional         | Moderate             | 1034        | 0-17 (n=6612); 18-49 (n=15157); 50-64 (n=13207); ≥65 (n=12933) | NR         | Non-probability | Residual sera | 0.7% (0.3-1.3%)                                      | Ortho-Clinical Diagnostics; Abbott; Roche   Elecsys Anti-SARS-CoV-2 pan-immunoglobulin immunoassay, ARCHITECT SARS-CoV-2 IgG immunoassay, VIT-ROS SARS-CoV-2 IgG immunoassay   IgG | 0.0%, 0.0% (Used author-adjusted estimate) | 0.7% (0.3-1.3%)                                  |
| Bajema (CDC COVID-19 Response) <sup>331</sup> | 2020-09-09 to 2020-09-17 | North Carolina | Regional         | Moderate             | 925         | 0-17 (n=6612); 18-49 (n=15157); 50-64 (n=13207); ≥65 (n=12933) | NR         | Non-probability | Residual sera | 6.8% (4.8-8.9%)                                      | Ortho-Clinical Diagnostics; Abbott; Roche   Elecsys Anti-SARS-CoV-2 pan-immunoglobulin immunoassay, ARCHITECT SARS-CoV-2 IgG                                                       | 0.0%, 0.0% (Used author-adjusted estimate) | 6.8% (5.2-8.5%)                                  |

| Article Author (Study Organization)           | Sampling Dates (YMD)     | Location      | Geographic Scope | Overall Risk of Bias | Sample Size | Age                                                            | Female (%) | Sampling method | Sample frame  | Uncorrected Seroprevalence (95% Confidence Interval) | Test Manufacturers   Isotypes                                                                                                                                                       | Test Sens, Spec (Source)                   | Corrected Seroprevalence (95% Credible Interval) |
|-----------------------------------------------|--------------------------|---------------|------------------|----------------------|-------------|----------------------------------------------------------------|------------|-----------------|---------------|------------------------------------------------------|-------------------------------------------------------------------------------------------------------------------------------------------------------------------------------------|--------------------------------------------|--------------------------------------------------|
|                                               |                          |               |                  |                      |             |                                                                |            |                 |               |                                                      | immunoassay, VIT- ROS SARS-CoV-2 IgG<br>immunoassay   IgG                                                                                                                           |                                            |                                                  |
| Bajema (CDC COVID-19 Response) <sup>331</sup> | 2020-09-10 to 2020-09-16 | California    | Regional         | Moderate             | 979         | 0-17 (n=6612); 18-49 (n=15157); 50-64 (n=13207); ≥65 (n=12933) | NR         | Non-probability | Residual sera | 4.9% (3.2-6.8%)                                      | Ortho-Clinical Diagnostics; Abbott; Roche   Elecsys Anti-SARS-CoV-2 pan-immunoglobulin immunoassay, ARCHITECT SARS-CoV-2 IgG immunoassay, VIT- ROS SARS-CoV-2 IgG immunoassay   IgG | 0.0%, 0.0% (Used author-adjusted estimate) | 4.9% (3.6-6.3%)                                  |
| Bajema (CDC COVID-19 Response) <sup>331</sup> | 2020-09-08 to 2020-09-16 | Tennessee     | Regional         | Moderate             | 1028        | 0-17 (n=6612); 18-49 (n=15157); 50-64 (n=13207); ≥65 (n=12933) | NR         | Non-probability | Residual sera | 6.7% (5.0-8.6%)                                      | Ortho-Clinical Diagnostics; Abbott; Roche   Elecsys Anti-SARS-CoV-2 pan-immunoglobulin immunoassay, ARCHITECT SARS-CoV-2 IgG immunoassay, VIT- ROS SARS-CoV-2 IgG immunoassay   IgG | 0.0%, 0.0% (Used author-adjusted estimate) | 6.7% (5.2-8.3%)                                  |
| Bajema (CDC COVID-19 Response) <sup>331</sup> | 2020-09-09 to 2020-09-15 | Massachusetts | Regional         | Moderate             | 988         | 0-17 (n=6612); 18-49 (n=15157); 50-64 (n=13207); ≥65 (n=12933) | NR         | Non-probability | Residual sera | 3.7% (2.2-5.2%)                                      | Ortho-Clinical Diagnostics; Abbott; Roche   Elecsys Anti-SARS-CoV-2 pan-immunoglobulin                                                                                              | 0.0%, 0.0% (Used author-adjusted estimate) | 3.7% (2.6-5.0%)                                  |

| Article Author (Study Organization)           | Sampling Dates (YMD)     | Location    | Geographic Scope | Overall Risk of Bias | Sample Size | Age                                                            | Female (%) | Sampling method | Sample frame  | Uncorrected Seroprevalence (95% Confidence Interval) | Test Manufacturers   Names   Isotypes                                                                                                                                               | Test Sens, Spec (Source)                   | Corrected Seroprevalence (95% Credible Interval) |
|-----------------------------------------------|--------------------------|-------------|------------------|----------------------|-------------|----------------------------------------------------------------|------------|-----------------|---------------|------------------------------------------------------|-------------------------------------------------------------------------------------------------------------------------------------------------------------------------------------|--------------------------------------------|--------------------------------------------------|
|                                               |                          |             |                  |                      |             |                                                                |            |                 |               |                                                      | immunoassay, ARCHITECT SARS-CoV-2 IgG<br>immunoassay, VIT- ROS SARS-CoV-2 IgG<br>immunoassay   IgG                                                                                  |                                            |                                                  |
| Bajema (CDC COVID-19 Response) <sup>331</sup> | 2020-09-08 to 2020-09-15 | Puerto Rico | Regional         | Moderate             | 970         | 0-17 (n=6612); 18-49 (n=15157); 50-64 (n=13207); ≥65 (n=12933) | NR         | Non-probability | Residual sera | 3.0% (1.8-4.3%)                                      | Ortho-Clinical Diagnostics; Abbott; Roche   Elecsys Anti-SARS-CoV-2 pan-immunoglobulin immunoassay, ARCHITECT SARS-CoV-2 IgG immunoassay, VIT- ROS SARS-CoV-2 IgG immunoassay   IgG | 0.0%, 0.0% (Used author-adjusted estimate) | 3.0% (2.1-4.2%)                                  |
| Bajema (CDC COVID-19 Response) <sup>331</sup> | 2020-09-09 to 2020-09-14 | Connecticut | Regional         | Moderate             | 982         | 0-17 (n=6612); 18-49 (n=15157); 50-64 (n=13207); ≥65 (n=12933) | NR         | Non-probability | Residual sera | 3.1% (2.1-4.4%)                                      | Ortho-Clinical Diagnostics; Abbott; Roche   Elecsys Anti-SARS-CoV-2 pan-immunoglobulin immunoassay, ARCHITECT SARS-CoV-2 IgG immunoassay, VIT- ROS SARS-CoV-2 IgG immunoassay   IgG | 0.0%, 0.0% (Used author-adjusted estimate) | 3.1% (2.1-4.3%)                                  |
| Bajema (CDC COVID-19 Response) <sup>331</sup> | 2020-09-09 to 2020-09-12 | Nevada      | Regional         | Moderate             | 979         | 0-17 (n=6612); 18-49 (n=15157); 50-                            | NR         | Non-probability | Residual sera | 7.8% (5.9-10.0%)                                     | Ortho-Clinical Diagnostics; Abbott; Roche   Elecsys Anti-                                                                                                                           | 0.0%, 0.0% (Used author-adjusted estimate) | 7.8% (6.2-9.6%)                                  |

| Article Author (Study Organization)           | Sampling Dates (YMD)     | Location | Geographic Scope | Overall Risk of Bias | Sample Size | Age                                                            | Female (%) | Sampling method | Sample frame  | Uncorrected Seroprevalence (95% Confidence Interval) | Test Manufacturers   Names   Isotypes                                                                                                                                               | Test Sens, Spec (Source)                   | Corrected Seroprevalence (95% Credible Interval) |
|-----------------------------------------------|--------------------------|----------|------------------|----------------------|-------------|----------------------------------------------------------------|------------|-----------------|---------------|------------------------------------------------------|-------------------------------------------------------------------------------------------------------------------------------------------------------------------------------------|--------------------------------------------|--------------------------------------------------|
|                                               |                          |          |                  |                      |             | 64 (n=13207); ≥65 (n=12933)                                    |            |                 |               |                                                      | SARS-CoV-2 pan-immunoglobulin immunoassay, ARCHITECT SARS-CoV-2 IgG immunoassay, VIT- ROS SARS-CoV-2 IgG immunoassay   IgG                                                          |                                            |                                                  |
| Bajema (CDC COVID-19 Response) <sup>331</sup> | 2020-09-11 to 2020-09-11 | Florida  | Regional         | Moderate             | 979         | 0-17 (n=6612); 18-49 (n=15157); 50-64 (n=13207); ≥65 (n=12933) | NR         | Non-probability | Residual sera | 8.5% (6.6-10.7%)                                     | Ortho-Clinical Diagnostics; Abbott; Roche   Elecsys Anti-SARS-CoV-2 pan-immunoglobulin immunoassay, ARCHITECT SARS-CoV-2 IgG immunoassay, VIT- ROS SARS-CoV-2 IgG immunoassay   IgG | 0.0%, 0.0% (Used author-adjusted estimate) | 8.5% (6.9-10.3%)                                 |
| Bajema (CDC COVID-19 Response) <sup>331</sup> | 2020-08-26 to 2020-09-10 | Delaware | Regional         | Moderate             | 914         | 0-17 (n=6484); 18-49 (n=14079); 50-64 (n=12426); ≥65 (n=12316) | NR         | Non-probability | Residual sera | 4.5% (2.4-7.1%)                                      | Ortho-Clinical Diagnostics; Abbott; Roche   Elecsys Anti-SARS-CoV-2 pan-immunoglobulin immunoassay, ARCHITECT SARS-CoV-2 IgG immunoassay, VIT- ROS SARS-CoV-2 IgG immunoassay   IgG | 0.0%, 0.0% (Used author-adjusted estimate) | 4.5% (3.3-6.0%)                                  |

| Article Author (Study Organization)           | Sampling Dates (YMD)     | Location | Geographic Scope | Overall Risk of Bias | Sample Size | Age                                                            | Female (%) | Sampling method | Sample frame  | Uncorrected Seroprevalence (95% Confidence Interval) | Test Manufacturers   Names   Isotypes                                                                                                                                               | Test Sens, Spec (Source)                   | Corrected Seroprevalence (95% Credible Interval) |
|-----------------------------------------------|--------------------------|----------|------------------|----------------------|-------------|----------------------------------------------------------------|------------|-----------------|---------------|------------------------------------------------------|-------------------------------------------------------------------------------------------------------------------------------------------------------------------------------------|--------------------------------------------|--------------------------------------------------|
| Bajema (CDC COVID-19 Response) <sup>331</sup> | 2020-08-25 to 2020-09-10 | Georgia  | Regional         | Moderate             | 1020        | 0-17 (n=6484); 18-49 (n=14079); 50-64 (n=12426); ≥65 (n=12316) | NR         | Non-probability | Residual sera | 8.7% (6.7-11.1%)                                     | Ortho-Clinical Diagnostics; Abbott; Roche   Elecsys Anti-SARS-CoV-2 pan-immunoglobulin immunoassay, ARCHITECT SARS-CoV-2 IgG immunoassay, VIT- ROS SARS-CoV-2 IgG immunoassay   IgG | 0.0%, 0.0% (Used author-adjusted estimate) | 8.7% (7.0-10.5%)                                 |
| Bajema (CDC COVID-19 Response) <sup>331</sup> | 2020-08-26 to 2020-09-10 | Idaho    | Regional         | Moderate             | 790         | 0-17 (n=6484); 18-49 (n=14079); 50-64 (n=12426); ≥65 (n=12316) | NR         | Non-probability | Residual sera | 5.7% (2.9-9.7%)                                      | Ortho-Clinical Diagnostics; Abbott; Roche   Elecsys Anti-SARS-CoV-2 pan-immunoglobulin immunoassay, ARCHITECT SARS-CoV-2 IgG immunoassay, VIT- ROS SARS-CoV-2 IgG immunoassay   IgG | 0.0%, 0.0% (Used author-adjusted estimate) | 5.7% (4.2-7.5%)                                  |
| Bajema (CDC COVID-19 Response) <sup>331</sup> | 2020-08-25 to 2020-09-10 | Iowa     | Regional         | Moderate             | 1006        | 0-17 (n=6484); 18-49 (n=14079); 50-64 (n=12426); ≥65 (n=12316) | NR         | Non-probability | Residual sera | 8.4% (6.2-10.7%)                                     | Ortho-Clinical Diagnostics; Abbott; Roche   Elecsys Anti-SARS-CoV-2 pan-immunoglobulin immunoassay, ARCHITECT SARS-CoV-2 IgG immunoassay, VIT- ROS SARS-CoV-2 IgG                   | 0.0%, 0.0% (Used author-adjusted estimate) | 8.4% (6.8-10.2%)                                 |

| Article Author (Study Organization)           | Sampling Dates (YMD)     | Location    | Geographic Scope | Overall Risk of Bias | Sample Size | Age                                                            | Female (%) | Sampling method | Sample frame  | Uncorrected Seroprevalence (95% Confidence Interval) | Test Manufacturers   Names   Isotypes                                                                                                                                              | Test Sens, Spec (Source)                   | Corrected Seroprevalence (95% Credible Interval) |
|-----------------------------------------------|--------------------------|-------------|------------------|----------------------|-------------|----------------------------------------------------------------|------------|-----------------|---------------|------------------------------------------------------|------------------------------------------------------------------------------------------------------------------------------------------------------------------------------------|--------------------------------------------|--------------------------------------------------|
|                                               |                          |             |                  |                      |             |                                                                |            |                 |               |                                                      | immunoassay   IgG                                                                                                                                                                  |                                            |                                                  |
| Bajema (CDC COVID-19 Response) <sup>331</sup> | 2020-08-26 to 2020-09-10 | Maine       | Regional         | Moderate             | 759         | 0-17 (n=6484); 18-49 (n=14079); 50-64 (n=12426); ≥65 (n=12316) | NR         | Non-probability | Residual sera | 1.5% (0.4-3.2%)                                      | Ortho-Clinical Diagnostics; Abbott; Roche   Elecsys Anti-SARS-CoV-2 pan-immunoglobulin immunoassay, ARCHITECT SARS-CoV-2 IgG immunoassay, VIT-ROS SARS-CoV-2 IgG immunoassay   IgG | 0.0%, 0.0% (Used author-adjusted estimate) | 1.5% (0.8-2.5%)                                  |
| Bajema (CDC COVID-19 Response) <sup>331</sup> | 2020-08-26 to 2020-09-10 | Mississippi | Regional         | Moderate             | 987         | 0-17 (n=6484); 18-49 (n=14079); 50-64 (n=12426); ≥65 (n=12316) | NR         | Non-probability | Residual sera | 8.4% (4.9-12.7%)                                     | Ortho-Clinical Diagnostics; Abbott; Roche   Elecsys Anti-SARS-CoV-2 pan-immunoglobulin immunoassay, ARCHITECT SARS-CoV-2 IgG immunoassay, VIT-ROS SARS-CoV-2 IgG immunoassay   IgG | 0.0%, 0.0% (Used author-adjusted estimate) | 8.4% (6.7-10.2%)                                 |
| Bajema (CDC COVID-19 Response) <sup>331</sup> | 2020-08-24 to 2020-09-10 | Missouri    | Regional         | Moderate             | 1024        | 0-17 (n=6484); 18-49 (n=14079); 50-64 (n=12426); ≥65 (n=12316) | NR         | Non-probability | Residual sera | 2.9% (1.7-4.2%)                                      | Ortho-Clinical Diagnostics; Abbott; Roche   Elecsys Anti-SARS-CoV-2 pan-immunoglobulin immunoassay, ARCHITECT SARS-CoV-2 IgG                                                       | 0.0%, 0.0% (Used author-adjusted estimate) | 2.9% (1.9-4.0%)                                  |



| Article Author (Study Organization)           | Sampling Dates (YMD)     | Location | Geographic Scope | Overall Risk of Bias | Sample Size | Age                                                            | Female (%) | Sampling method | Sample frame  | Uncorrected Seroprevalence (95% Confidence Interval) | Test Manufacturers   Names   Isotypes                                                                                                                                               | Test Sens, Spec (Source)                   | Corrected Seroprevalence (95% Credible Interval) |
|-----------------------------------------------|--------------------------|----------|------------------|----------------------|-------------|----------------------------------------------------------------|------------|-----------------|---------------|------------------------------------------------------|-------------------------------------------------------------------------------------------------------------------------------------------------------------------------------------|--------------------------------------------|--------------------------------------------------|
|                                               |                          |          |                  |                      |             |                                                                |            |                 |               |                                                      | immunoassay, VIT- ROS SARS-CoV-2 IgG<br>immunoassay   IgG                                                                                                                           |                                            |                                                  |
| Bajema (CDC COVID-19 Response) <sup>331</sup> | 2020-08-24 to 2020-09-10 | Nebraska | Regional         | Moderate             | 938         | 0-17 (n=6484); 18-49 (n=14079); 50-64 (n=12426); ≥65 (n=12316) | NR         | Non-probability | Residual sera | 6.3% (4.5-8.3%)                                      | Ortho-Clinical Diagnostics; Abbott; Roche   Elecsys Anti-SARS-CoV-2 pan-immunoglobulin immunoassay, ARCHITECT SARS-CoV-2 IgG immunoassay, VIT- ROS SARS-CoV-2 IgG immunoassay   IgG | 0.0%, 0.0% (Used author-adjusted estimate) | 6.3% (4.9-8.0%)                                  |
| Bajema (CDC COVID-19 Response) <sup>331</sup> | 2020-08-26 to 2020-09-10 | New York | Regional         | Moderate             | 1043        | 0-17 (n=6484); 18-49 (n=14079); 50-64 (n=12426); ≥65 (n=12316) | NR         | Non-probability | Residual sera | 19.5% (16.9-22.4%)                                   | Ortho-Clinical Diagnostics; Abbott; Roche   Elecsys Anti-SARS-CoV-2 pan-immunoglobulin immunoassay, ARCHITECT SARS-CoV-2 IgG immunoassay, VIT- ROS SARS-CoV-2 IgG immunoassay   IgG | 0.0%, 0.0% (Used author-adjusted estimate) | 19.5% (17.1-21.9%)                               |
| Bajema (CDC COVID-19 Response) <sup>331</sup> | 2020-08-27 to 2020-09-10 | Ohio     | Regional         | Moderate             | 983         | 0-17 (n=6484); 18-49 (n=14079); 50-64 (n=12426); ≥65 (n=12316) | NR         | Non-probability | Residual sera | 5.0% (3.2-7.1%)                                      | Ortho-Clinical Diagnostics; Abbott; Roche   Elecsys Anti-SARS-CoV-2 pan-immunoglobulin                                                                                              | 0.0%, 0.0% (Used author-adjusted estimate) | 5.0% (3.8-6.5%)                                  |

| Article Author (Study Organization)           | Sampling Dates (YMD)     | Location       | Geographic Scope | Overall Risk of Bias | Sample Size | Age                                                            | Female (%) | Sampling method | Sample frame  | Uncorrected Seroprevalence (95% Confidence Interval) | Test Manufacturers   Names   Isotypes                                                                                                                                               | Test Sens, Spec (Source)                   | Corrected Seroprevalence (95% Credible Interval) |
|-----------------------------------------------|--------------------------|----------------|------------------|----------------------|-------------|----------------------------------------------------------------|------------|-----------------|---------------|------------------------------------------------------|-------------------------------------------------------------------------------------------------------------------------------------------------------------------------------------|--------------------------------------------|--------------------------------------------------|
|                                               |                          |                |                  |                      |             |                                                                |            |                 |               |                                                      | immunoassay, ARCHITECT SARS-CoV-2 IgG<br>immunoassay, VIT- ROS SARS-CoV-2 IgG<br>immunoassay   IgG                                                                                  |                                            |                                                  |
| Bajema (CDC COVID-19 Response) <sup>331</sup> | 2020-08-26 to 2020-09-10 | Oregon         | Regional         | Moderate             | 968         | 0-17 (n=6484); 18-49 (n=14079); 50-64 (n=12426); ≥65 (n=12316) | NR         | Non-probability | Residual sera | 1.9% (0.9-2.9%)                                      | Ortho-Clinical Diagnostics; Abbott; Roche   Elecsys Anti-SARS-CoV-2 pan-immunoglobulin immunoassay, ARCHITECT SARS-CoV-2 IgG immunoassay, VIT- ROS SARS-CoV-2 IgG immunoassay   IgG | 0.0%, 0.0% (Used author-adjusted estimate) | 1.9% (1.1-2.9%)                                  |
| Bajema (CDC COVID-19 Response) <sup>331</sup> | 2020-08-27 to 2020-09-10 | Rhode Island   | Regional         | Moderate             | 786         | 0-17 (n=6484); 18-49 (n=14079); 50-64 (n=12426); ≥65 (n=12316) | NR         | Non-probability | Residual sera | 3.1% (1.7-4.6%)                                      | Ortho-Clinical Diagnostics; Abbott; Roche   Elecsys Anti-SARS-CoV-2 pan-immunoglobulin immunoassay, ARCHITECT SARS-CoV-2 IgG immunoassay, VIT- ROS SARS-CoV-2 IgG immunoassay   IgG | 0.0%, 0.0% (Used author-adjusted estimate) | 3.1% (2.0-4.4%)                                  |
| Bajema (CDC COVID-19 Response) <sup>331</sup> | 2020-08-26 to 2020-09-10 | South Carolina | Regional         | Moderate             | 927         | 0-17 (n=6484); 18-49 (n=14079); 50-                            | NR         | Non-probability | Residual sera | 7.2% (5.1-9.6%)                                      | Ortho-Clinical Diagnostics; Abbott; Roche   Elecsys Anti-                                                                                                                           | 0.0%, 0.0% (Used author-adjusted estimate) | 7.2% (5.6-8.9%)                                  |

| Article Author (Study Organization)           | Sampling Dates (YMD)     | Location     | Geographic Scope | Overall Risk of Bias | Sample Size | Age                                                            | Female (%) | Sampling method | Sample frame  | Uncorrected Seroprevalence (95% Confidence Interval) | Test Manufacturers   Names   Isotypes                                                                                                                                               | Test Sens, Spec (Source)                   | Corrected Seroprevalence (95% Credible Interval) |
|-----------------------------------------------|--------------------------|--------------|------------------|----------------------|-------------|----------------------------------------------------------------|------------|-----------------|---------------|------------------------------------------------------|-------------------------------------------------------------------------------------------------------------------------------------------------------------------------------------|--------------------------------------------|--------------------------------------------------|
|                                               |                          |              |                  |                      |             | 64 (n=12426); ≥65 (n=12316)                                    |            |                 |               |                                                      | SARS-CoV-2 pan-immunoglobulin immunoassay, ARCHITECT SARS-CoV-2 IgG immunoassay, VIT- ROS SARS-CoV-2 IgG immunoassay   IgG                                                          |                                            |                                                  |
| Bajema (CDC COVID-19 Response) <sup>331</sup> | 2020-08-26 to 2020-09-10 | South Dakota | Regional         | High                 | 97          | 0-17 (n=6484); 18-49 (n=14079); 50-64 (n=12426); ≥65 (n=12316) | NR         | Non-probability | Residual sera | 0.7% (0.0-2.5%)                                      | Ortho-Clinical Diagnostics; Abbott; Roche   Elecsys Anti-SARS-CoV-2 pan-immunoglobulin immunoassay, ARCHITECT SARS-CoV-2 IgG immunoassay, VIT- ROS SARS-CoV-2 IgG immunoassay   IgG | 0.0%, 0.0% (Used author-adjusted estimate) | 0.7% (0.0-2.5%)                                  |
| Bajema (CDC COVID-19 Response) <sup>331</sup> | 2020-08-26 to 2020-09-10 | Vermont      | Regional         | High                 | 485         | 0-17 (n=6484); 18-49 (n=14079); 50-64 (n=12426); ≥65 (n=12316) | NR         | Non-probability | Residual sera | 0.4% (0.0-0.9%)                                      | Ortho-Clinical Diagnostics; Abbott; Roche   Elecsys Anti-SARS-CoV-2 pan-immunoglobulin immunoassay, ARCHITECT SARS-CoV-2 IgG immunoassay, VIT- ROS SARS-CoV-2 IgG immunoassay   IgG | 0.0%, 0.0% (Used author-adjusted estimate) | 0.4% (0.0-1.0%)                                  |

| Article Author (Study Organization)           | Sampling Dates (YMD)     | Location       | Geographic Scope | Overall Risk of Bias | Sample Size | Age                                                            | Female (%) | Sampling method | Sample frame  | Uncorrected Seroprevalence (95% Confidence Interval) | Test Manufacturers   Names   Isotypes                                                                                                                                              | Test Sens, Spec (Source)                   | Corrected Seroprevalence (95% Credible Interval) |
|-----------------------------------------------|--------------------------|----------------|------------------|----------------------|-------------|----------------------------------------------------------------|------------|-----------------|---------------|------------------------------------------------------|------------------------------------------------------------------------------------------------------------------------------------------------------------------------------------|--------------------------------------------|--------------------------------------------------|
| Bajema (CDC COVID-19 Response) <sup>331</sup> | 2020-08-25 to 2020-09-10 | Washington     | Regional         | Moderate             | 820         | 0-17 (n=6484); 18-49 (n=14079); 50-64 (n=12426); ≥65 (n=12316) | NR         | Non-probability | Residual sera | 4.5% (2.6-6.9%)                                      | Ortho-Clinical Diagnostics; Abbott; Roche   Elecsys Anti-SARS-CoV-2 pan-immunoglobulin immunoassay, ARCHITECT SARS-CoV-2 IgG immunoassay, VIT-ROS SARS-CoV-2 IgG immunoassay   IgG | 0.0%, 0.0% (Used author-adjusted estimate) | 4.5% (3.1-6.0%)                                  |
| Bajema (CDC COVID-19 Response) <sup>331</sup> | 2020-08-27 to 2020-09-10 | Washington D.C | Regional         | Moderate             | 643         | 0-17 (n=6484); 18-49 (n=14079); 50-64 (n=12426); ≥65 (n=12316) | NR         | Non-probability | Residual sera | 5.0% (2.8-7.5%)                                      | Ortho-Clinical Diagnostics; Abbott; Roche   Elecsys Anti-SARS-CoV-2 pan-immunoglobulin immunoassay, ARCHITECT SARS-CoV-2 IgG immunoassay, VIT-ROS SARS-CoV-2 IgG immunoassay   IgG | 0.0%, 0.0% (Used author-adjusted estimate) | 5.0% (3.5-6.9%)                                  |
| Bajema (CDC COVID-19 Response) <sup>331</sup> | 2020-08-26 to 2020-09-10 | West Virginia  | Regional         | Moderate             | 1128        | 0-17 (n=6484); 18-49 (n=14079); 50-64 (n=12426); ≥65 (n=12316) | NR         | Non-probability | Residual sera | 1.5% (0.8-2.4%)                                      | Ortho-Clinical Diagnostics; Abbott; Roche   Elecsys Anti-SARS-CoV-2 pan-immunoglobulin immunoassay, ARCHITECT SARS-CoV-2 IgG immunoassay, VIT-ROS SARS-CoV-2 IgG                   | 0.0%, 0.0% (Used author-adjusted estimate) | 1.5% (0.8-2.2%)                                  |

| Article Author (Study Organization)           | Sampling Dates (YMD)     | Location  | Geographic Scope | Overall Risk of Bias | Sample Size | Age                                                            | Female (%) | Sampling method | Sample frame  | Uncorrected Seroprevalence (95% Confidence Interval) | Test Manufacturers   Names   Isotypes                                                                                                                                              | Test Sens, Spec (Source)                   | Corrected Seroprevalence (95% Credible Interval) |
|-----------------------------------------------|--------------------------|-----------|------------------|----------------------|-------------|----------------------------------------------------------------|------------|-----------------|---------------|------------------------------------------------------|------------------------------------------------------------------------------------------------------------------------------------------------------------------------------------|--------------------------------------------|--------------------------------------------------|
|                                               |                          |           |                  |                      |             |                                                                |            |                 |               |                                                      | immunoassay   IgG                                                                                                                                                                  |                                            |                                                  |
| Bajema (CDC COVID-19 Response) <sup>331</sup> | 2020-08-25 to 2020-09-10 | Wisconsin | Regional         | Moderate             | 976         | 0-17 (n=6484); 18-49 (n=14079); 50-64 (n=12426); ≥65 (n=12316) | NR         | Non-probability | Residual sera | 2.6% (1.5-4.0%)                                      | Ortho-Clinical Diagnostics; Abbott; Roche   Elecsys Anti-SARS-CoV-2 pan-immunoglobulin immunoassay, ARCHITECT SARS-CoV-2 IgG immunoassay, VIT-ROS SARS-CoV-2 IgG immunoassay   IgG | 0.0%, 0.0% (Used author-adjusted estimate) | 2.6% (1.7-3.7%)                                  |
| Bajema (CDC COVID-19 Response) <sup>331</sup> | 2020-08-26 to 2020-09-09 | Alaska    | Regional         | Moderate             | 610         | 0-17 (n=6484); 18-49 (n=14079); 50-64 (n=12426); ≥65 (n=12316) | NR         | Non-probability | Residual sera | 1.0% (0.2-2.2%)                                      | Ortho-Clinical Diagnostics; Abbott; Roche   Elecsys Anti-SARS-CoV-2 pan-immunoglobulin immunoassay, ARCHITECT SARS-CoV-2 IgG immunoassay, VIT-ROS SARS-CoV-2 IgG immunoassay   IgG | 0.0%, 0.0% (Used author-adjusted estimate) | 1.0% (0.4-2.0%)                                  |
| Bajema (CDC COVID-19 Response) <sup>331</sup> | 2020-08-26 to 2020-09-09 | Arizona   | Regional         | Moderate             | 1030        | 0-17 (n=6484); 18-49 (n=14079); 50-64 (n=12426); ≥65 (n=12316) | NR         | Non-probability | Residual sera | 4.9% (3.0-7.1%)                                      | Ortho-Clinical Diagnostics; Abbott; Roche   Elecsys Anti-SARS-CoV-2 pan-immunoglobulin immunoassay, ARCHITECT SARS-CoV-2 IgG                                                       | 0.0%, 0.0% (Used author-adjusted estimate) | 4.9% (3.7-6.3%)                                  |

| Article Author (Study Organization)           | Sampling Dates (YMD)     | Location   | Geographic Scope | Overall Risk of Bias | Sample Size | Age                                                            | Female (%) | Sampling method | Sample frame  | Uncorrected Seroprevalence (95% Confidence Interval) | Test Manufacturers   Isotypes                                                                                                                                                       | Test Sens, Spec (Source)                   | Corrected Seroprevalence (95% Credible Interval) |
|-----------------------------------------------|--------------------------|------------|------------------|----------------------|-------------|----------------------------------------------------------------|------------|-----------------|---------------|------------------------------------------------------|-------------------------------------------------------------------------------------------------------------------------------------------------------------------------------------|--------------------------------------------|--------------------------------------------------|
|                                               |                          |            |                  |                      |             |                                                                |            |                 |               |                                                      | immunoassay, VIT- ROS SARS-CoV-2 IgG<br>immunoassay   IgG                                                                                                                           |                                            |                                                  |
| Bajema (CDC COVID-19 Response) <sup>331</sup> | 2020-08-28 to 2020-09-09 | California | Regional         | Moderate             | 983         | 0-17 (n=6484); 18-49 (n=14079); 50-64 (n=12426); ≥65 (n=12316) | NR         | Non-probability | Residual sera | 6.0% (4.2-7.8%)                                      | Ortho-Clinical Diagnostics; Abbott; Roche   Elecsys Anti-SARS-CoV-2 pan-immunoglobulin immunoassay, ARCHITECT SARS-CoV-2 IgG immunoassay, VIT- ROS SARS-CoV-2 IgG immunoassay   IgG | 0.0%, 0.0% (Used author-adjusted estimate) | 6.0% (4.6-7.5%)                                  |
| Bajema (CDC COVID-19 Response) <sup>331</sup> | 2020-08-27 to 2020-09-09 | Florida    | Regional         | Moderate             | 981         | 0-17 (n=6484); 18-49 (n=14079); 50-64 (n=12426); ≥65 (n=12316) | NR         | Non-probability | Residual sera | 5.7% (3.9-7.5%)                                      | Ortho-Clinical Diagnostics; Abbott; Roche   Elecsys Anti-SARS-CoV-2 pan-immunoglobulin immunoassay, ARCHITECT SARS-CoV-2 IgG immunoassay, VIT- ROS SARS-CoV-2 IgG immunoassay   IgG | 0.0%, 0.0% (Used author-adjusted estimate) | 5.7% (4.3-7.2%)                                  |
| Bajema (CDC COVID-19 Response) <sup>331</sup> | 2020-08-26 to 2020-09-09 | Indiana    | Regional         | Moderate             | 984         | 0-17 (n=6484); 18-49 (n=14079); 50-64 (n=12426); ≥65 (n=12316) | NR         | Non-probability | Residual sera | 2.4% (1.4-3.5%)                                      | Ortho-Clinical Diagnostics; Abbott; Roche   Elecsys Anti-SARS-CoV-2 pan-immunoglobulin                                                                                              | 0.0%, 0.0% (Used author-adjusted estimate) | 2.4% (1.5-3.4%)                                  |

| Article Author (Study Organization)           | Sampling Dates (YMD)     | Location       | Geographic Scope | Overall Risk of Bias | Sample Size | Age                                                            | Female (%) | Sampling method | Sample frame  | Uncorrected Seroprevalence (95% Confidence Interval) | Test Manufacturers   Names   Isotypes                                                                                                                                               | Test Sens, Spec (Source)                   | Corrected Seroprevalence (95% Credible Interval) |
|-----------------------------------------------|--------------------------|----------------|------------------|----------------------|-------------|----------------------------------------------------------------|------------|-----------------|---------------|------------------------------------------------------|-------------------------------------------------------------------------------------------------------------------------------------------------------------------------------------|--------------------------------------------|--------------------------------------------------|
|                                               |                          |                |                  |                      |             |                                                                |            |                 |               |                                                      | immunoassay, ARCHITECT SARS-CoV-2 IgG<br>immunoassay, VIT- ROS SARS-CoV-2 IgG<br>immunoassay   IgG                                                                                  |                                            |                                                  |
| Bajema (CDC COVID-19 Response) <sup>331</sup> | 2020-08-24 to 2020-09-09 | Montana        | Regional         | High                 | 518         | 0-17 (n=6484); 18-49 (n=14079); 50-64 (n=12426); ≥65 (n=12316) | NR         | Non-probability | Residual sera | 0.9% (0.2-1.8%)                                      | Ortho-Clinical Diagnostics; Abbott; Roche   Elecsys Anti-SARS-CoV-2 pan-immunoglobulin immunoassay, ARCHITECT SARS-CoV-2 IgG immunoassay, VIT- ROS SARS-CoV-2 IgG immunoassay   IgG | 0.0%, 0.0% (Used author-adjusted estimate) | 0.9% (0.3-1.8%)                                  |
| Bajema (CDC COVID-19 Response) <sup>331</sup> | 2020-08-26 to 2020-09-09 | North Carolina | Regional         | Moderate             | 982         | 0-17 (n=6484); 18-49 (n=14079); 50-64 (n=12426); ≥65 (n=12316) | NR         | Non-probability | Residual sera | 3.8% (2.3-5.3%)                                      | Ortho-Clinical Diagnostics; Abbott; Roche   Elecsys Anti-SARS-CoV-2 pan-immunoglobulin immunoassay, ARCHITECT SARS-CoV-2 IgG immunoassay, VIT- ROS SARS-CoV-2 IgG immunoassay   IgG | 0.0%, 0.0% (Used author-adjusted estimate) | 3.8% (2.7-5.1%)                                  |
| Bajema (CDC COVID-19 Response) <sup>331</sup> | 2020-08-26 to 2020-09-09 | North Dakota   | Regional         | High                 | 109         | 0-17 (n=6484); 18-49 (n=14079); 50-                            | NR         | Non-probability | Residual sera | 0.2% (0.0-1.0%)                                      | Ortho-Clinical Diagnostics; Abbott; Roche   Elecsys Anti-                                                                                                                           | 0.0%, 0.0% (Used author-adjusted estimate) | 0.2% (0.0-2.3%)                                  |

| Article Author (Study Organization)           | Sampling Dates (YMD)     | Location     | Geographic Scope | Overall Risk of Bias | Sample Size | Age                                                            | Female (%) | Sampling method | Sample frame  | Uncorrected Seroprevalence (95% Confidence Interval) | Test Manufacturers   Names   Isotypes                                                                                                                                               | Test Sens, Spec (Source)                   | Corrected Seroprevalence (95% Credible Interval) |
|-----------------------------------------------|--------------------------|--------------|------------------|----------------------|-------------|----------------------------------------------------------------|------------|-----------------|---------------|------------------------------------------------------|-------------------------------------------------------------------------------------------------------------------------------------------------------------------------------------|--------------------------------------------|--------------------------------------------------|
|                                               |                          |              |                  |                      |             | 64 (n=12426); ≥65 (n=12316)                                    |            |                 |               |                                                      | SARS-CoV-2 pan-immunoglobulin immunoassay, ARCHITECT SARS-CoV-2 IgG immunoassay, VIT- ROS SARS-CoV-2 IgG immunoassay   IgG                                                          |                                            |                                                  |
| Bajema (CDC COVID-19 Response) <sup>331</sup> | 2020-08-26 to 2020-09-09 | Pennsylvania | Regional         | Moderate             | 845         | 0-17 (n=6484); 18-49 (n=14079); 50-64 (n=12426); ≥65 (n=12316) | NR         | Non-probability | Residual sera | 9.5% (6.6-13.6%)                                     | Ortho-Clinical Diagnostics; Abbott; Roche   Elecsys Anti-SARS-CoV-2 pan-immunoglobulin immunoassay, ARCHITECT SARS-CoV-2 IgG immunoassay, VIT- ROS SARS-CoV-2 IgG immunoassay   IgG | 0.0%, 0.0% (Used author-adjusted estimate) | 9.5% (7.6-11.6%)                                 |
| Bajema (CDC COVID-19 Response) <sup>331</sup> | 2020-08-26 to 2020-09-08 | Alabama      | Regional         | Moderate             | 955         | 0-17 (n=6484); 18-49 (n=14079); 50-64 (n=12426); ≥65 (n=12316) | NR         | Non-probability | Residual sera | 9.9% (7.2-12.8%)                                     | Ortho-Clinical Diagnostics; Abbott; Roche   Elecsys Anti-SARS-CoV-2 pan-immunoglobulin immunoassay, ARCHITECT SARS-CoV-2 IgG immunoassay, VIT- ROS SARS-CoV-2 IgG immunoassay   IgG | 0.0%, 0.0% (Used author-adjusted estimate) | 9.9% (8.1-11.9%)                                 |



| Article Author (Study Organization)           | Sampling Dates (YMD)     | Location  | Geographic Scope | Overall Risk of Bias | Sample Size | Age                                                            | Female (%) | Sampling method | Sample frame  | Uncorrected Seroprevalence (95% Confidence Interval) | Test Manufacturers   Names   Isotypes                                                                                                                                              | Test Sens, Spec (Source)                   | Corrected Seroprevalence (95% Credible Interval) |
|-----------------------------------------------|--------------------------|-----------|------------------|----------------------|-------------|----------------------------------------------------------------|------------|-----------------|---------------|------------------------------------------------------|------------------------------------------------------------------------------------------------------------------------------------------------------------------------------------|--------------------------------------------|--------------------------------------------------|
| Bajema (CDC COVID-19 Response) <sup>331</sup> | 2020-08-24 to 2020-09-08 | Arkansas  | Regional         | Moderate             | 992         | 0-17 (n=6484); 18-49 (n=14079); 50-64 (n=12426); ≥65 (n=12316) | NR         | Non-probability | Residual sera | 4.9% (3.5-6.4%)                                      | Ortho-Clinical Diagnostics; Abbott; Roche   Elecsys Anti-SARS-CoV-2 pan-immunoglobulin immunoassay, ARCHITECT SARS-CoV-2 IgG immunoassay, VIT-ROS SARS-CoV-2 IgG immunoassay   IgG | 0.0%, 0.0% (Used author-adjusted estimate) | 4.9% (3.6-6.3%)                                  |
| Bajema (CDC COVID-19 Response) <sup>331</sup> | 2020-08-26 to 2020-09-08 | Kentucky  | Regional         | Moderate             | 983         | 0-17 (n=6484); 18-49 (n=14079); 50-64 (n=12426); ≥65 (n=12316) | NR         | Non-probability | Residual sera | 3.1% (1.9-4.3%)                                      | Ortho-Clinical Diagnostics; Abbott; Roche   Elecsys Anti-SARS-CoV-2 pan-immunoglobulin immunoassay, ARCHITECT SARS-CoV-2 IgG immunoassay, VIT-ROS SARS-CoV-2 IgG immunoassay   IgG | 0.0%, 0.0% (Used author-adjusted estimate) | 3.1% (2.1-4.3%)                                  |
| Bajema (CDC COVID-19 Response) <sup>331</sup> | 2020-08-26 to 2020-09-08 | Louisiana | Regional         | Moderate             | 1001        | 0-17 (n=6484); 18-49 (n=14079); 50-64 (n=12426); ≥65 (n=12316) | NR         | Non-probability | Residual sera | 8.6% (6.7-11.3%)                                     | Ortho-Clinical Diagnostics; Abbott; Roche   Elecsys Anti-SARS-CoV-2 pan-immunoglobulin immunoassay, ARCHITECT SARS-CoV-2 IgG immunoassay, VIT-ROS SARS-CoV-2 IgG                   | 0.0%, 0.0% (Used author-adjusted estimate) | 8.6% (7.0-10.4%)                                 |

| Article Author (Study Organization)           | Sampling Dates (YMD)     | Location   | Geographic Scope | Overall Risk of Bias | Sample Size | Age                                                            | Female (%) | Sampling method | Sample frame  | Uncorrected Seroprevalence (95% Confidence Interval) | Test Manufacturers   Names   Isotypes                                                                                                                                              | Test Sens, Spec (Source)                   | Corrected Seroprevalence (95% Credible Interval) |
|-----------------------------------------------|--------------------------|------------|------------------|----------------------|-------------|----------------------------------------------------------------|------------|-----------------|---------------|------------------------------------------------------|------------------------------------------------------------------------------------------------------------------------------------------------------------------------------------|--------------------------------------------|--------------------------------------------------|
|                                               |                          |            |                  |                      |             |                                                                |            |                 |               |                                                      | immunoassay   IgG                                                                                                                                                                  |                                            |                                                  |
| Bajema (CDC COVID-19 Response) <sup>331</sup> | 2020-08-26 to 2020-09-08 | Maryland   | Regional         | Moderate             | 980         | 0-17 (n=6484); 18-49 (n=14079); 50-64 (n=12426); ≥65 (n=12316) | NR         | Non-probability | Residual sera | 7.9% (5.7-10.3%)                                     | Ortho-Clinical Diagnostics; Abbott; Roche   Elecsys Anti-SARS-CoV-2 pan-immunoglobulin immunoassay, ARCHITECT SARS-CoV-2 IgG immunoassay, VIT-ROS SARS-CoV-2 IgG immunoassay   IgG | 0.0%, 0.0% (Used author-adjusted estimate) | 7.9% (6.3-9.7%)                                  |
| Bajema (CDC COVID-19 Response) <sup>331</sup> | 2020-08-26 to 2020-09-08 | Minnesota  | Regional         | Moderate             | 974         | 0-17 (n=6484); 18-49 (n=14079); 50-64 (n=12426); ≥65 (n=12316) | NR         | Non-probability | Residual sera | 9.2% (6.7-11.9%)                                     | Ortho-Clinical Diagnostics; Abbott; Roche   Elecsys Anti-SARS-CoV-2 pan-immunoglobulin immunoassay, ARCHITECT SARS-CoV-2 IgG immunoassay, VIT-ROS SARS-CoV-2 IgG immunoassay   IgG | 0.0%, 0.0% (Used author-adjusted estimate) | 9.2% (7.4-11.1%)                                 |
| Bajema (CDC COVID-19 Response) <sup>331</sup> | 2020-08-25 to 2020-09-08 | New Mexico | Regional         | Moderate             | 985         | 0-17 (n=6484); 18-49 (n=14079); 50-64 (n=12426); ≥65 (n=12316) | NR         | Non-probability | Residual sera | 3.7% (2.3-5.5%)                                      | Ortho-Clinical Diagnostics; Abbott; Roche   Elecsys Anti-SARS-CoV-2 pan-immunoglobulin immunoassay, ARCHITECT SARS-CoV-2 IgG                                                       | 0.0%, 0.0% (Used author-adjusted estimate) | 3.7% (2.6-5.0%)                                  |

| Article Author (Study Organization)           | Sampling Dates (YMD)     | Location  | Geographic Scope | Overall Risk of Bias | Sample Size | Age                                                            | Female (%) | Sampling method | Sample frame  | Uncorrected Seroprevalence (95% Confidence Interval) | Test Manufacturers   Names   Isotypes                                                                                                                                               | Test Sens, Spec (Source)                   | Corrected Seroprevalence (95% Credible Interval) |
|-----------------------------------------------|--------------------------|-----------|------------------|----------------------|-------------|----------------------------------------------------------------|------------|-----------------|---------------|------------------------------------------------------|-------------------------------------------------------------------------------------------------------------------------------------------------------------------------------------|--------------------------------------------|--------------------------------------------------|
|                                               |                          |           |                  |                      |             |                                                                |            |                 |               |                                                      | immunoassay, VIT- ROS SARS-CoV-2 IgG immunoassay   IgG                                                                                                                              |                                            |                                                  |
| Bajema (CDC COVID-19 Response) <sup>331</sup> | 2020-08-25 to 2020-09-08 | Tennessee | Regional         | Moderate             | 950         | 0-17 (n=6484); 18-49 (n=14079); 50-64 (n=12426); ≥65 (n=12316) | NR         | Non-probability | Residual sera | 5.4% (3.6-7.3%)                                      | Ortho-Clinical Diagnostics; Abbott; Roche   Elecsys Anti-SARS-CoV-2 pan-immunoglobulin immunoassay, ARCHITECT SARS-CoV-2 IgG immunoassay, VIT- ROS SARS-CoV-2 IgG immunoassay   IgG | 0.0%, 0.0% (Used author-adjusted estimate) | 5.4% (4.1-6.9%)                                  |
| Bajema (CDC COVID-19 Response) <sup>331</sup> | 2020-08-24 to 2020-09-08 | Utah      | Regional         | Moderate             | 1104        | 0-17 (n=6484); 18-49 (n=14079); 50-64 (n=12426); ≥65 (n=12316) | NR         | Non-probability | Residual sera | 4.9% (2.8-7.7%)                                      | Ortho-Clinical Diagnostics; Abbott; Roche   Elecsys Anti-SARS-CoV-2 pan-immunoglobulin immunoassay, ARCHITECT SARS-CoV-2 IgG immunoassay, VIT- ROS SARS-CoV-2 IgG immunoassay   IgG | 0.0%, 0.0% (Used author-adjusted estimate) | 4.9% (3.7-6.3%)                                  |
| Bajema (CDC COVID-19 Response) <sup>331</sup> | 2020-08-26 to 2020-09-08 | Virginia  | Regional         | Moderate             | 1007        | 0-17 (n=6484); 18-49 (n=14079); 50-64 (n=12426); ≥65 (n=12316) | NR         | Non-probability | Residual sera | 3.5% (2.0-5.3%)                                      | Ortho-Clinical Diagnostics; Abbott; Roche   Elecsys Anti-SARS-CoV-2 pan-immunoglobulin                                                                                              | 0.0%, 0.0% (Used author-adjusted estimate) | 3.5% (2.5-4.7%)                                  |

| Article Author (Study Organization)                 | Sampling Dates (YMD)     | Location           | Geographic Scope | Overall Risk of Bias | Sample Size | Age                                                            | Female (%) | Sampling method | Sample frame                    | Uncorrected Seroprevalence (95% Confidence Interval) | Test Manufacturers   Names   Isotypes                                                                                                                                                     | Test Sens, Spec (Source)                                                             | Corrected Seroprevalence (95% Credible Interval) |
|-----------------------------------------------------|--------------------------|--------------------|------------------|----------------------|-------------|----------------------------------------------------------------|------------|-----------------|---------------------------------|------------------------------------------------------|-------------------------------------------------------------------------------------------------------------------------------------------------------------------------------------------|--------------------------------------------------------------------------------------|--------------------------------------------------|
|                                                     |                          |                    |                  |                      |             |                                                                |            |                 |                                 |                                                      | immunoassay, ARCHITECT SARS-CoV-2 IgG<br>immunoassay, VIT- ROS SARS-CoV-2 IgG<br>immunoassay   IgG                                                                                        |                                                                                      |                                                  |
| Bajema (CDC COVID-19 Response) <sup>331</sup>       | 2020-08-26 to 2020-09-07 | New Jersey         | Regional         | Moderate             | 944         | 0-17 (n=6484); 18-49 (n=14079); 50-64 (n=12426); ≥65 (n=12316) | NR         | Non-probability | Residual sera                   | 12.8% (10.5-15.3%)                                   | Ortho-Clinical Diagnostics; Abbott; Roche   Elecsys Anti-SARS-CoV-2 pan-immunoglobulin immunoassay, ARCHITECT SARS-CoV-2 IgG<br>immunoassay, VIT- ROS SARS-CoV-2 IgG<br>immunoassay   IgG | 0.0%, 0.0% (Used author-adjusted estimate)                                           | 12.8% (10.7-15.0%)                               |
| Demonbreun (Northwestern University) <sup>334</sup> | 2020-06-24 to 2020-09-06 | Illinois   Chicago | Local            | High                 | 1545        | Median 37 (IQR 18)                                             | 59.3       | Non-probability | Household and community samples | 19.8%                                                | In-House   NR   IgG                                                                                                                                                                       | 75.6%, 97.6% (Used Bastos SR/MA data; no sens, spec, or author adjustment available) | 23.6% (20.6-26.6%)                               |
| Bajema (CDC COVID-19 Response) <sup>331</sup>       | 2020-08-27 to 2020-09-05 | Massachusetts      | Regional         | Moderate             | 981         | 0-17 (n=6484); 18-49 (n=14079); 50-64 (n=12426); ≥65 (n=12316) | NR         | Non-probability | Residual sera                   | 3.6% (2.4-5.1%)                                      | Ortho-Clinical Diagnostics; Abbott; Roche   Elecsys Anti-SARS-CoV-2 pan-immunoglobulin immunoassay, ARCHITECT SARS-CoV-2 IgG<br>immunoassay, VIT- ROS SARS-CoV-2                          | 0.0%, 0.0% (Used author-adjusted estimate)                                           | 3.6% (2.5-4.9%)                                  |

| Article Author (Study Organization)           | Sampling Dates (YMD)     | Location    | Geographic Scope | Overall Risk of Bias | Sample Size | Age                                                            | Female (%) | Sampling method | Sample frame  | Uncorrected Seroprevalence (95% Confidence Interval) | Test Manufacturers   Names   Isotypes                                                                                                                                              | Test Sens, Spec (Source)                   | Corrected Seroprevalence (95% Credible Interval) |
|-----------------------------------------------|--------------------------|-------------|------------------|----------------------|-------------|----------------------------------------------------------------|------------|-----------------|---------------|------------------------------------------------------|------------------------------------------------------------------------------------------------------------------------------------------------------------------------------------|--------------------------------------------|--------------------------------------------------|
|                                               |                          |             |                  |                      |             |                                                                |            |                 |               |                                                      | IgG immunoassay   IgG                                                                                                                                                              |                                            |                                                  |
| Bajema (CDC COVID-19 Response) <sup>331</sup> | 2020-08-24 to 2020-09-04 | Colorado    | Regional         | Moderate             | 1025        | 0-17 (n=6484); 18-49 (n=14079); 50-64 (n=12426); ≥65 (n=12316) | NR         | Non-probability | Residual sera | 3.6% (2.3-5.1%)                                      | Ortho-Clinical Diagnostics; Abbott; Roche   Elecsys Anti-SARS-CoV-2 pan-immunoglobulin immunoassay, ARCHITECT SARS-CoV-2 IgG immunoassay, VIT-ROS SARS-CoV-2 IgG immunoassay   IgG | 0.0%, 0.0% (Used author-adjusted estimate) | 3.6% (2.5-4.8%)                                  |
| Bajema (CDC COVID-19 Response) <sup>331</sup> | 2020-08-26 to 2020-09-04 | Connecticut | Regional         | Moderate             | 983         | 0-17 (n=6484); 18-49 (n=14079); 50-64 (n=12426); ≥65 (n=12316) | NR         | Non-probability | Residual sera | 4.3% (2.9-5.7%)                                      | Ortho-Clinical Diagnostics; Abbott; Roche   Elecsys Anti-SARS-CoV-2 pan-immunoglobulin immunoassay, ARCHITECT SARS-CoV-2 IgG immunoassay, VIT-ROS SARS-CoV-2 IgG immunoassay   IgG | 0.0%, 0.0% (Used author-adjusted estimate) | 4.3% (3.1-5.7%)                                  |
| Bajema (CDC COVID-19 Response) <sup>331</sup> | 2020-08-26 to 2020-09-03 | Illinois    | Regional         | Moderate             | 979         | 0-17 (n=6484); 18-49 (n=14079); 50-64 (n=12426); ≥65 (n=12316) | NR         | Non-probability | Residual sera | 5.6% (3.9-7.7%)                                      | Ortho-Clinical Diagnostics; Abbott; Roche   Elecsys Anti-SARS-CoV-2 pan-immunoglobulin immunoassay, ARCHITECT SARS-CoV-2                                                           | 0.0%, 0.0% (Used author-adjusted estimate) | 5.6% (4.2-7.1%)                                  |

| Article Author (Study Organization)           | Sampling Dates (YMD)     | Location      | Geographic Scope | Overall Risk of Bias | Sample Size | Age                                                            | Female (%) | Sampling method | Sample frame  | Uncorrected Seroprevalence (95% Confidence Interval) | Test Manufacturers   Names   Isotypes                                                                                                                                               | Test Sens, Spec (Source)                   | Corrected Seroprevalence (95% Credible Interval) |
|-----------------------------------------------|--------------------------|---------------|------------------|----------------------|-------------|----------------------------------------------------------------|------------|-----------------|---------------|------------------------------------------------------|-------------------------------------------------------------------------------------------------------------------------------------------------------------------------------------|--------------------------------------------|--------------------------------------------------|
|                                               |                          |               |                  |                      |             |                                                                |            |                 |               |                                                      | IgG immunoassay, VIT- ROS SARS-CoV-2 IgG immunoassay   IgG                                                                                                                          |                                            |                                                  |
| Bajema (CDC COVID-19 Response) <sup>331</sup> | 2020-08-24 to 2020-09-03 | Kansas        | Regional         | Moderate             | 1025        | 0-17 (n=6484); 18-49 (n=14079); 50-64 (n=12426); ≥65 (n=12316) | NR         | Non-probability | Residual sera | 2.9% (1.6-4.3%)                                      | Ortho-Clinical Diagnostics; Abbott; Roche   Elecsys Anti-SARS-CoV-2 pan-immunoglobulin immunoassay, ARCHITECT SARS-CoV-2 IgG immunoassay, VIT- ROS SARS-CoV-2 IgG immunoassay   IgG | 0.0%, 0.0% (Used author-adjusted estimate) | 2.9% (1.9-4.0%)                                  |
| Bajema (CDC COVID-19 Response) <sup>331</sup> | 2020-08-26 to 2020-09-03 | Michigan      | Regional         | Moderate             | 976         | 0-17 (n=6484); 18-49 (n=14079); 50-64 (n=12426); ≥65 (n=12316) | NR         | Non-probability | Residual sera | 3.4% (2.2-5.0%)                                      | Ortho-Clinical Diagnostics; Abbott; Roche   Elecsys Anti-SARS-CoV-2 pan-immunoglobulin immunoassay, ARCHITECT SARS-CoV-2 IgG immunoassay, VIT- ROS SARS-CoV-2 IgG immunoassay   IgG | 0.0%, 0.0% (Used author-adjusted estimate) | 3.4% (2.4-4.7%)                                  |
| Bajema (CDC COVID-19 Response) <sup>331</sup> | 2020-08-26 to 2020-09-03 | New Hampshire | Regional         | Moderate             | 1147        | 0-17 (n=6484); 18-49 (n=14079); 50-64 (n=12426); ≥65 (n=12316) | NR         | Non-probability | Residual sera | 1.6% (0.7-2.8%)                                      | Ortho-Clinical Diagnostics; Abbott; Roche   Elecsys Anti-SARS-CoV-2 pan-immunoglobulin                                                                                              | 0.0%, 0.0% (Used author-adjusted estimate) | 1.6% (1.0-2.4%)                                  |

| Article Author (Study Organization)           | Sampling Dates (YMD)     | Location    | Geographic Scope | Overall Risk of Bias | Sample Size | Age                                                            | Female (%) | Sampling method | Sample frame  | Uncorrected Seroprevalence (95% Confidence Interval) | Test Manufacturers   Names   Isotypes                                                                                                                                               | Test Sens, Spec (Source)                   | Corrected Seroprevalence (95% Credible Interval) |
|-----------------------------------------------|--------------------------|-------------|------------------|----------------------|-------------|----------------------------------------------------------------|------------|-----------------|---------------|------------------------------------------------------|-------------------------------------------------------------------------------------------------------------------------------------------------------------------------------------|--------------------------------------------|--------------------------------------------------|
|                                               |                          |             |                  |                      |             |                                                                |            |                 |               |                                                      | n immunoassay, ARCHITECT SARS-CoV-2 IgG immunoassay, VIT- ROS SARS-CoV-2 IgG immunoassay   IgG                                                                                      |                                            |                                                  |
| Bajema (CDC COVID-19 Response) <sup>331</sup> | 2020-08-24 to 2020-09-03 | Puerto Rico | Regional         | Moderate             | 980         | 0-17 (n=6484); 18-49 (n=14079); 50-64 (n=12426); ≥65 (n=12316) | NR         | Non-probability | Residual sera | 2.5% (1.4-3.8%)                                      | Ortho-Clinical Diagnostics; Abbott; Roche   Elecsys Anti-SARS-CoV-2 pan-immunoglobulin immunoassay, ARCHITECT SARS-CoV-2 IgG immunoassay, VIT- ROS SARS-CoV-2 IgG immunoassay   IgG | 0.0%, 0.0% (Used author-adjusted estimate) | 2.5% (1.6-3.6%)                                  |
| Bajema (CDC COVID-19 Response) <sup>331</sup> | 2020-08-25 to 2020-09-02 | Texas       | Regional         | Moderate             | 979         | 0-17 (n=6484); 18-49 (n=14079); 50-64 (n=12426); ≥65 (n=12316) | NR         | Non-probability | Residual sera | 5.8% (4.0-7.9%)                                      | Ortho-Clinical Diagnostics; Abbott; Roche   Elecsys Anti-SARS-CoV-2 pan-immunoglobulin immunoassay, ARCHITECT SARS-CoV-2 IgG immunoassay, VIT- ROS SARS-CoV-2 IgG immunoassay   IgG | 0.0%, 0.0% (Used author-adjusted estimate) | 5.8% (4.4-7.3%)                                  |
| Bajema (CDC COVID-19 Response) <sup>331</sup> | 2020-08-24 to 2020-09-01 | Oklahoma    | Regional         | Moderate             | 979         | 0-17 (n=6484); 18-49 (n=14079); 50-                            | NR         | Non-probability | Residual sera | 5.4% (3.8-7.3%)                                      | Ortho-Clinical Diagnostics; Abbott; Roche                                                                                                                                           | 0.0%, 0.0% (Used author-                   | 5.4% (4.0-6.9%)                                  |

| Article Author (Study Organization)             | Sampling Dates (YMD)     | Location  | Geographic Scope | Overall Risk of Bias | Sample Size | Age                                                                     | Female (%) | Sampling method | Sample frame                    | Uncorrected Seroprevalence (95% Confidence Interval) | Test Manufacturers   Names   Isotypes                                                                                                                                               | Test Sens, Spec (Source)                    | Corrected Seroprevalence (95% Credible Interval) |
|-------------------------------------------------|--------------------------|-----------|------------------|----------------------|-------------|-------------------------------------------------------------------------|------------|-----------------|---------------------------------|------------------------------------------------------|-------------------------------------------------------------------------------------------------------------------------------------------------------------------------------------|---------------------------------------------|--------------------------------------------------|
|                                                 |                          |           |                  |                      |             | 64 (n=12426);<br>≥65 (n=12316)                                          |            |                 |                                 |                                                      | Elecsys Anti-SARS-CoV-2 pan-immunoglobulin immunoassay, ARCHITECT SARS-CoV-2 IgG immunoassay, VIT- ROS SARS-CoV-2 IgG immunoassay   IgG                                             | adjusted estimate)                          |                                                  |
| Maleck (University of Wisconsin) <sup>325</sup> | 2020-07-01 to 2020-08-31 | Wisconsin | Regional         | Moderate             | 996         | NR                                                                      | NR         | Probability     | Household and community samples | 1.6% (0.6-2.5%)                                      | Abbott   Abbott Architect SARS-CoV-2 IgG antibody test   IgG                                                                                                                        | 0.0%, 99.6% (Used author-adjusted estimate) | 1.6% (0.9-2.4%)                                  |
| Bajema (CDC COVID-19 Response) <sup>331</sup>   | 2020-08-27 to 2020-08-29 | Nevada    | Regional         | Moderate             | 980         | 0-17 (n=6484);<br>18-49 (n=14079);<br>50-64 (n=12426);<br>≥65 (n=12316) | NR         | Non-probability | Residual sera                   | 6.5% (4.6-8.6%)                                      | Ortho-Clinical Diagnostics; Abbott; Roche   Elecsys Anti-SARS-CoV-2 pan-immunoglobulin immunoassay, ARCHITECT SARS-CoV-2 IgG immunoassay, VIT- ROS SARS-CoV-2 IgG immunoassay   IgG | 0.0%, 0.0% (Used author-adjusted estimate)  | 6.5% (5.0-8.1%)                                  |
| Bajema (CDC COVID-19 Response) <sup>331</sup>   | 2020-08-12 to 2020-08-27 | Delaware  | Regional         | Moderate             | 1004        | 0-17 (n=6920);<br>18-49 (n=14571);<br>50-64 (n=12514);<br>≥65 (n=11856) | NR         | Non-probability | Residual sera                   | 8.5% (5.8-11.2%)                                     | Ortho-Clinical Diagnostics; Abbott; Roche   Elecsys Anti-SARS-CoV-2 pan-immunoglobulin immunoassay, ARCHITECT SARS-CoV-2 IgG                                                        | 0.0%, 0.0% (Used author-adjusted estimate)  | 8.5% (6.9-10.3%)                                 |



| Article Author (Study Organization)           | Sampling Dates (YMD)     | Location | Geographic Scope | Overall Risk of Bias | Sample Size | Age                                                            | Female (%) | Sampling method | Sample frame  | Uncorrected Seroprevalence (95% Confidence Interval) | Test Manufacturers   Isotypes                                                                                                                                                       | Test Sens, Spec (Source)                   | Corrected Seroprevalence (95% Credible Interval) |
|-----------------------------------------------|--------------------------|----------|------------------|----------------------|-------------|----------------------------------------------------------------|------------|-----------------|---------------|------------------------------------------------------|-------------------------------------------------------------------------------------------------------------------------------------------------------------------------------------|--------------------------------------------|--------------------------------------------------|
|                                               |                          |          |                  |                      |             |                                                                |            |                 |               |                                                      | immunoassay, VIT- ROS SARS-CoV-2 IgG<br>immunoassay   IgG                                                                                                                           |                                            |                                                  |
| Bajema (CDC COVID-19 Response) <sup>331</sup> | 2020-08-12 to 2020-08-27 | Illinois | Regional         | Moderate             | 985         | 0-17 (n=6920); 18-49 (n=14571); 50-64 (n=12514); ≥65 (n=11856) | NR         | Non-probability | Residual sera | 4.9% (3.4-6.7%)                                      | Ortho-Clinical Diagnostics; Abbott; Roche   Elecsys Anti-SARS-CoV-2 pan-immunoglobulin immunoassay, ARCHITECT SARS-CoV-2 IgG immunoassay, VIT- ROS SARS-CoV-2 IgG immunoassay   IgG | 0.0%, 0.0% (Used author-adjusted estimate) | 4.9% (3.7-6.4%)                                  |
| Bajema (CDC COVID-19 Response) <sup>331</sup> | 2020-08-12 to 2020-08-27 | Iowa     | Regional         | Moderate             | 980         | 0-17 (n=6920); 18-49 (n=14571); 50-64 (n=12514); ≥65 (n=11856) | NR         | Non-probability | Residual sera | 9.4% (7.1-11.6%)                                     | Ortho-Clinical Diagnostics; Abbott; Roche   Elecsys Anti-SARS-CoV-2 pan-immunoglobulin immunoassay, ARCHITECT SARS-CoV-2 IgG immunoassay, VIT- ROS SARS-CoV-2 IgG immunoassay   IgG | 0.0%, 0.0% (Used author-adjusted estimate) | 9.4% (7.7-11.3%)                                 |
| Bajema (CDC COVID-19 Response) <sup>331</sup> | 2020-08-12 to 2020-08-27 | Maine    | Regional         | Moderate             | 609         | 0-17 (n=6920); 18-49 (n=14571); 50-64 (n=12514); ≥65 (n=11856) | NR         | Non-probability | Residual sera | 0.6% (0.0-1.4%)                                      | Ortho-Clinical Diagnostics; Abbott; Roche   Elecsys Anti-SARS-CoV-2 pan-immunoglobulin                                                                                              | 0.0%, 0.0% (Used author-adjusted estimate) | 0.6% (0.1-1.3%)                                  |

| Article Author (Study Organization)           | Sampling Dates (YMD)     | Location      | Geographic Scope | Overall Risk of Bias | Sample Size | Age                                                            | Female (%) | Sampling method | Sample frame  | Uncorrected Seroprevalence (95% Confidence Interval) | Test Manufacturers   Names   Isotypes                                                                                                                                               | Test Sens, Spec (Source)                   | Corrected Seroprevalence (95% Credible Interval) |
|-----------------------------------------------|--------------------------|---------------|------------------|----------------------|-------------|----------------------------------------------------------------|------------|-----------------|---------------|------------------------------------------------------|-------------------------------------------------------------------------------------------------------------------------------------------------------------------------------------|--------------------------------------------|--------------------------------------------------|
|                                               |                          |               |                  |                      |             |                                                                |            |                 |               |                                                      | immunoassay, ARCHITECT SARS-CoV-2 IgG<br>immunoassay, VIT- ROS SARS-CoV-2 IgG<br>immunoassay   IgG                                                                                  |                                            |                                                  |
| Bajema (CDC COVID-19 Response) <sup>331</sup> | 2020-08-12 to 2020-08-27 | Massachusetts | Regional         | Moderate             | 980         | 0-17 (n=6920); 18-49 (n=14571); 50-64 (n=12514); ≥65 (n=11856) | NR         | Non-probability | Residual sera | 3.7% (2.3-5.2%)                                      | Ortho-Clinical Diagnostics; Abbott; Roche   Elecsys Anti-SARS-CoV-2 pan-immunoglobulin immunoassay, ARCHITECT SARS-CoV-2 IgG immunoassay, VIT- ROS SARS-CoV-2 IgG immunoassay   IgG | 0.0%, 0.0% (Used author-adjusted estimate) | 3.7% (2.6-5.0%)                                  |
| Bajema (CDC COVID-19 Response) <sup>331</sup> | 2020-08-11 to 2020-08-27 | Minnesota     | Regional         | Moderate             | 978         | 0-17 (n=6920); 18-49 (n=14571); 50-64 (n=12514); ≥65 (n=11856) | NR         | Non-probability | Residual sera | 4.5% (3.0-5.9%)                                      | Ortho-Clinical Diagnostics; Abbott; Roche   Elecsys Anti-SARS-CoV-2 pan-immunoglobulin immunoassay, ARCHITECT SARS-CoV-2 IgG immunoassay, VIT- ROS SARS-CoV-2 IgG immunoassay   IgG | 0.0%, 0.0% (Used author-adjusted estimate) | 4.5% (3.3-5.9%)                                  |
| Bajema (CDC COVID-19 Response) <sup>331</sup> | 2020-08-12 to 2020-08-27 | Mississippi   | Regional         | Moderate             | 968         | 0-17 (n=6920); 18-49 (n=14571); 50-                            | NR         | Non-probability | Residual sera | 10.0% (6.7-14.7%)                                    | Ortho-Clinical Diagnostics; Abbott; Roche   Elecsys Anti-                                                                                                                           | 0.0%, 0.0% (Used author-adjusted estimate) | 10.0% (8.2-11.9%)                                |

| Article Author (Study Organization)           | Sampling Dates (YMD)     | Location       | Geographic Scope | Overall Risk of Bias | Sample Size | Age                                                                      | Female (%) | Sampling method | Sample frame  | Uncorrected Seroprevalence (95% Confidence Interval) | Test Manufacturers   Names   Isotypes                                                                                                                                               | Test Sens, Spec (Source)                   | Corrected Seroprevalence (95% Credible Interval) |
|-----------------------------------------------|--------------------------|----------------|------------------|----------------------|-------------|--------------------------------------------------------------------------|------------|-----------------|---------------|------------------------------------------------------|-------------------------------------------------------------------------------------------------------------------------------------------------------------------------------------|--------------------------------------------|--------------------------------------------------|
|                                               |                          |                |                  |                      |             | 64 (n=12514 );<br>≥65 (n=11856)                                          |            |                 |               |                                                      | SARS-CoV-2 pan-immunoglobulin immunoassay, ARCHITECT SARS-CoV-2 IgG immunoassay, VIT- ROS SARS-CoV-2 IgG immunoassay   IgG                                                          |                                            |                                                  |
| Bajema (CDC COVID-19 Response) <sup>331</sup> | 2020-08-10 to 2020-08-27 | New Mexico     | Regional         | Moderate             | 976         | 0-17 (n=6920);<br>18-49 (n=14571);<br>50-64 (n=12514 );<br>≥65 (n=11856) | NR         | Non-probability | Residual sera | 2.5% (1.5-3.8%)                                      | Ortho-Clinical Diagnostics; Abbott; Roche   Elecsys Anti-SARS-CoV-2 pan-immunoglobulin immunoassay, ARCHITECT SARS-CoV-2 IgG immunoassay, VIT- ROS SARS-CoV-2 IgG immunoassay   IgG | 0.0%, 0.0% (Used author-adjusted estimate) | 2.5% (1.6-3.6%)                                  |
| Bajema (CDC COVID-19 Response) <sup>331</sup> | 2020-08-11 to 2020-08-27 | North Carolina | Regional         | Moderate             | 982         | 0-17 (n=6920);<br>18-49 (n=14571);<br>50-64 (n=12514 );<br>≥65 (n=11856) | NR         | Non-probability | Residual sera | 3.8% (2.3-5.3%)                                      | Ortho-Clinical Diagnostics; Abbott; Roche   Elecsys Anti-SARS-CoV-2 pan-immunoglobulin immunoassay, ARCHITECT SARS-CoV-2 IgG immunoassay, VIT- ROS SARS-CoV-2 IgG immunoassay   IgG | 0.0%, 0.0% (Used author-adjusted estimate) | 3.8% (2.7-5.1%)                                  |

| Article Author (Study Organization)           | Sampling Dates (YMD)     | Location     | Geographic Scope | Overall Risk of Bias | Sample Size | Age                                                            | Female (%) | Sampling method | Sample frame  | Uncorrected Seroprevalence (95% Confidence Interval) | Test Manufacturers   Names   Isotypes                                                                                                                                              | Test Sens, Spec (Source)                   | Corrected Seroprevalence (95% Credible Interval) |
|-----------------------------------------------|--------------------------|--------------|------------------|----------------------|-------------|----------------------------------------------------------------|------------|-----------------|---------------|------------------------------------------------------|------------------------------------------------------------------------------------------------------------------------------------------------------------------------------------|--------------------------------------------|--------------------------------------------------|
| Bajema (CDC COVID-19 Response) <sup>331</sup> | 2020-08-12 to 2020-08-27 | Ohio         | Regional         | Moderate             | 985         | 0-17 (n=6920); 18-49 (n=14571); 50-64 (n=12514); ≥65 (n=11856) | NR         | Non-probability | Residual sera | 2.1% (1.1-3.3%)                                      | Ortho-Clinical Diagnostics; Abbott; Roche   Elecsys Anti-SARS-CoV-2 pan-immunoglobulin immunoassay, ARCHITECT SARS-CoV-2 IgG immunoassay, VIT-ROS SARS-CoV-2 IgG immunoassay   IgG | 0.0%, 0.0% (Used author-adjusted estimate) | 2.1% (1.3-3.1%)                                  |
| Bajema (CDC COVID-19 Response) <sup>331</sup> | 2020-08-10 to 2020-08-27 | Oregon       | Regional         | Moderate             | 1086        | 0-17 (n=6920); 18-49 (n=14571); 50-64 (n=12514); ≥65 (n=11856) | NR         | Non-probability | Residual sera | 2.4% (1.4-3.6%)                                      | Ortho-Clinical Diagnostics; Abbott; Roche   Elecsys Anti-SARS-CoV-2 pan-immunoglobulin immunoassay, ARCHITECT SARS-CoV-2 IgG immunoassay, VIT-ROS SARS-CoV-2 IgG immunoassay   IgG | 0.0%, 0.0% (Used author-adjusted estimate) | 2.4% (1.6-3.4%)                                  |
| Bajema (CDC COVID-19 Response) <sup>331</sup> | 2020-08-12 to 2020-08-27 | Rhode Island | Regional         | High                 | 570         | 0-17 (n=6920); 18-49 (n=14571); 50-64 (n=12514); ≥65 (n=11856) | NR         | Non-probability | Residual sera | 3.6% (1.7-5.9%)                                      | Ortho-Clinical Diagnostics; Abbott; Roche   Elecsys Anti-SARS-CoV-2 pan-immunoglobulin immunoassay, ARCHITECT SARS-CoV-2 IgG immunoassay, VIT-ROS SARS-CoV-2 IgG                   | 0.0%, 0.0% (Used author-adjusted estimate) | 3.6% (2.2-5.3%)                                  |

| Article Author (Study Organization)           | Sampling Dates (YMD)     | Location       | Geographic Scope | Overall Risk of Bias | Sample Size | Age                                                            | Female (%) | Sampling method | Sample frame  | Uncorrected Seroprevalence (95% Confidence Interval) | Test Manufacturers   Names   Isotypes                                                                                                                                              | Test Sens, Spec (Source)                   | Corrected Seroprevalence (95% Credible Interval) |
|-----------------------------------------------|--------------------------|----------------|------------------|----------------------|-------------|----------------------------------------------------------------|------------|-----------------|---------------|------------------------------------------------------|------------------------------------------------------------------------------------------------------------------------------------------------------------------------------------|--------------------------------------------|--------------------------------------------------|
|                                               |                          |                |                  |                      |             |                                                                |            |                 |               |                                                      | immunoassay   IgG                                                                                                                                                                  |                                            |                                                  |
| Bajema (CDC COVID-19 Response) <sup>331</sup> | 2020-08-12 to 2020-08-27 | South Carolina | Regional         | Moderate             | 1063        | 0-17 (n=6920); 18-49 (n=14571); 50-64 (n=12514); ≥65 (n=11856) | NR         | Non-probability | Residual sera | 6.0% (4.4-8.0%)                                      | Ortho-Clinical Diagnostics; Abbott; Roche   Elecsys Anti-SARS-CoV-2 pan-immunoglobulin immunoassay, ARCHITECT SARS-CoV-2 IgG immunoassay, VIT-ROS SARS-CoV-2 IgG immunoassay   IgG | 0.0%, 0.0% (Used author-adjusted estimate) | 6.0% (4.6-7.5%)                                  |
| Bajema (CDC COVID-19 Response) <sup>331</sup> | 2020-08-13 to 2020-08-27 | Vermont        | Regional         | High                 | 382         | 0-17 (n=6920); 18-49 (n=14571); 50-64 (n=12514); ≥65 (n=11856) | NR         | Non-probability | Residual sera | 0.3% (0.0-0.8%)                                      | Ortho-Clinical Diagnostics; Abbott; Roche   Elecsys Anti-SARS-CoV-2 pan-immunoglobulin immunoassay, ARCHITECT SARS-CoV-2 IgG immunoassay, VIT-ROS SARS-CoV-2 IgG immunoassay   IgG | 0.0%, 0.0% (Used author-adjusted estimate) | 0.3% (0.0-1.2%)                                  |
| Bajema (CDC COVID-19 Response) <sup>331</sup> | 2020-08-12 to 2020-08-27 | Washington     | Regional         | Moderate             | 1238        | 0-17 (n=6920); 18-49 (n=14571); 50-64 (n=12514); ≥65 (n=11856) | NR         | Non-probability | Residual sera | 3.0% (1.8-4.5%)                                      | Ortho-Clinical Diagnostics; Abbott; Roche   Elecsys Anti-SARS-CoV-2 pan-immunoglobulin immunoassay, ARCHITECT SARS-CoV-2 IgG                                                       | 0.0%, 0.0% (Used author-adjusted estimate) | 3.0% (2.1-4.0%)                                  |

| Article Author (Study Organization)           | Sampling Dates (YMD)     | Location       | Geographic Scope | Overall Risk of Bias | Sample Size | Age                                                            | Female (%) | Sampling method | Sample frame  | Uncorrected Seroprevalence (95% Confidence Interval) | Test Manufacturers   Isotypes                                                                                                                                                       | Test Sens, Spec (Source)                   | Corrected Seroprevalence (95% Credible Interval) |
|-----------------------------------------------|--------------------------|----------------|------------------|----------------------|-------------|----------------------------------------------------------------|------------|-----------------|---------------|------------------------------------------------------|-------------------------------------------------------------------------------------------------------------------------------------------------------------------------------------|--------------------------------------------|--------------------------------------------------|
|                                               |                          |                |                  |                      |             |                                                                |            |                 |               |                                                      | immunoassay, VIT- ROS SARS-CoV-2 IgG<br>immunoassay   IgG                                                                                                                           |                                            |                                                  |
| Bajema (CDC COVID-19 Response) <sup>331</sup> | 2020-08-13 to 2020-08-27 | Washington D.C | Regional         | Moderate             | 781         | 0-17 (n=6920); 18-49 (n=14571); 50-64 (n=12514); ≥65 (n=11856) | NR         | Non-probability | Residual sera | 6.8% (4.6-9.2%)                                      | Ortho-Clinical Diagnostics; Abbott; Roche   Elecsys Anti-SARS-CoV-2 pan-immunoglobulin immunoassay, ARCHITECT SARS-CoV-2 IgG immunoassay, VIT- ROS SARS-CoV-2 IgG immunoassay   IgG | 0.0%, 0.0% (Used author-adjusted estimate) | 6.8% (5.2-8.7%)                                  |
| Bajema (CDC COVID-19 Response) <sup>331</sup> | 2020-08-13 to 2020-08-27 | West Virginia  | Regional         | Moderate             | 637         | 0-17 (n=6920); 18-49 (n=14571); 50-64 (n=12514); ≥65 (n=11856) | NR         | Non-probability | Residual sera | 2.2% (0.5-4.9%)                                      | Ortho-Clinical Diagnostics; Abbott; Roche   Elecsys Anti-SARS-CoV-2 pan-immunoglobulin immunoassay, ARCHITECT SARS-CoV-2 IgG immunoassay, VIT- ROS SARS-CoV-2 IgG immunoassay   IgG | 0.0%, 0.0% (Used author-adjusted estimate) | 2.2% (1.3-3.6%)                                  |
| Bajema (CDC COVID-19 Response) <sup>331</sup> | 2020-08-12 to 2020-08-27 | Wisconsin      | Regional         | Moderate             | 838         | 0-17 (n=6920); 18-49 (n=14571); 50-64 (n=12514); ≥65 (n=11856) | NR         | Non-probability | Residual sera | 3.3% (2.0-4.7%)                                      | Ortho-Clinical Diagnostics; Abbott; Roche   Elecsys Anti-SARS-CoV-2 pan-immunoglobulin                                                                                              | 0.0%, 0.0% (Used author-adjusted estimate) | 3.3% (2.2-4.6%)                                  |

| Article Author (Study Organization)           | Sampling Dates (YMD)     | Location | Geographic Scope | Overall Risk of Bias | Sample Size | Age                                                            | Female (%) | Sampling method | Sample frame  | Uncorrected Seroprevalence (95% Confidence Interval) | Test Manufacturers   Names   Isotypes                                                                                                                                               | Test Sens, Spec (Source)                   | Corrected Seroprevalence (95% Credible Interval) |
|-----------------------------------------------|--------------------------|----------|------------------|----------------------|-------------|----------------------------------------------------------------|------------|-----------------|---------------|------------------------------------------------------|-------------------------------------------------------------------------------------------------------------------------------------------------------------------------------------|--------------------------------------------|--------------------------------------------------|
|                                               |                          |          |                  |                      |             |                                                                |            |                 |               |                                                      | immunoassay, ARCHITECT SARS-CoV-2 IgG<br>immunoassay, VIT- ROS SARS-CoV-2 IgG<br>immunoassay   IgG                                                                                  |                                            |                                                  |
| Bajema (CDC COVID-19 Response) <sup>331</sup> | 2020-08-12 to 2020-08-26 | Alabama  | Regional         | Moderate             | 974         | 0-17 (n=6920); 18-49 (n=14571); 50-64 (n=12514); ≥65 (n=11856) | NR         | Non-probability | Residual sera | 7.6% (5.3-9.8%)                                      | Ortho-Clinical Diagnostics; Abbott; Roche   Elecsys Anti-SARS-CoV-2 pan-immunoglobulin immunoassay, ARCHITECT SARS-CoV-2 IgG immunoassay, VIT- ROS SARS-CoV-2 IgG immunoassay   IgG | 0.0%, 0.0% (Used author-adjusted estimate) | 7.6% (6.1-9.4%)                                  |
| Bajema (CDC COVID-19 Response) <sup>331</sup> | 2020-08-12 to 2020-08-26 | Alaska   | Regional         | Moderate             | 704         | 0-17 (n=6920); 18-49 (n=14571); 50-64 (n=12514); ≥65 (n=11856) | NR         | Non-probability | Residual sera | 1.3% (0.5-2.3%)                                      | Ortho-Clinical Diagnostics; Abbott; Roche   Elecsys Anti-SARS-CoV-2 pan-immunoglobulin immunoassay, ARCHITECT SARS-CoV-2 IgG immunoassay, VIT- ROS SARS-CoV-2 IgG immunoassay   IgG | 0.0%, 0.0% (Used author-adjusted estimate) | 1.3% (0.6-2.3%)                                  |
| Bajema (CDC COVID-19 Response) <sup>331</sup> | 2020-08-12 to 2020-08-26 | Arizona  | Regional         | Moderate             | 1304        | 0-17 (n=6920); 18-49 (n=14571); 50-                            | NR         | Non-probability | Residual sera | 4.7% (2.7-7.6%)                                      | Ortho-Clinical Diagnostics; Abbott; Roche   Elecsys Anti-                                                                                                                           | 0.0%, 0.0% (Used author-adjusted estimate) | 4.7% (3.6-5.9%)                                  |

| Article Author (Study Organization)           | Sampling Dates (YMD)     | Location | Geographic Scope | Overall Risk of Bias | Sample Size | Age                                                                      | Female (%) | Sampling method | Sample frame  | Uncorrected Seroprevalence (95% Confidence Interval) | Test Manufacturers   Names   Isotypes                                                                                                                                               | Test Sens, Spec (Source)                   | Corrected Seroprevalence (95% Credible Interval) |
|-----------------------------------------------|--------------------------|----------|------------------|----------------------|-------------|--------------------------------------------------------------------------|------------|-----------------|---------------|------------------------------------------------------|-------------------------------------------------------------------------------------------------------------------------------------------------------------------------------------|--------------------------------------------|--------------------------------------------------|
|                                               |                          |          |                  |                      |             | 64 (n=12514 );<br>≥65 (n=11856)                                          |            |                 |               |                                                      | SARS-CoV-2 pan-immunoglobulin immunoassay, ARCHITECT SARS-CoV-2 IgG immunoassay, VIT- ROS SARS-CoV-2 IgG immunoassay   IgG                                                          |                                            |                                                  |
| Bajema (CDC COVID-19 Response) <sup>331</sup> | 2020-08-13 to 2020-08-26 | Georgia  | Regional         | Moderate             | 1031        | 0-17 (n=6920);<br>18-49 (n=14571);<br>50-64 (n=12514 );<br>≥65 (n=11856) | NR         | Non-probability | Residual sera | 7.4% (5.5-9.5%)                                      | Ortho-Clinical Diagnostics; Abbott; Roche   Elecsys Anti-SARS-CoV-2 pan-immunoglobulin immunoassay, ARCHITECT SARS-CoV-2 IgG immunoassay, VIT- ROS SARS-CoV-2 IgG immunoassay   IgG | 0.0%, 0.0% (Used author-adjusted estimate) | 7.4% (5.9-9.1%)                                  |
| Bajema (CDC COVID-19 Response) <sup>331</sup> | 2020-08-12 to 2020-08-26 | Idaho    | Regional         | Moderate             | 651         | 0-17 (n=6920);<br>18-49 (n=14571);<br>50-64 (n=12514 );<br>≥65 (n=11856) | NR         | Non-probability | Residual sera | 4.6% (1.7-9.1%)                                      | Ortho-Clinical Diagnostics; Abbott; Roche   Elecsys Anti-SARS-CoV-2 pan-immunoglobulin immunoassay, ARCHITECT SARS-CoV-2 IgG immunoassay, VIT- ROS SARS-CoV-2 IgG immunoassay   IgG | 0.0%, 0.0% (Used author-adjusted estimate) | 4.6% (3.1-6.2%)                                  |



| Article Author (Study Organization)           | Sampling Dates (YMD)     | Location | Geographic Scope | Overall Risk of Bias | Sample Size | Age                                                            | Female (%) | Sampling method | Sample frame  | Uncorrected Seroprevalence (95% Confidence Interval) | Test Manufacturers   Names   Isotypes                                                                                                                                               | Test Sens, Spec (Source)                   | Corrected Seroprevalence (95% Credible Interval) |
|-----------------------------------------------|--------------------------|----------|------------------|----------------------|-------------|----------------------------------------------------------------|------------|-----------------|---------------|------------------------------------------------------|-------------------------------------------------------------------------------------------------------------------------------------------------------------------------------------|--------------------------------------------|--------------------------------------------------|
| Bajema (CDC COVID-19 Response) <sup>331</sup> | 2020-08-12 to 2020-08-26 | Indiana  | Regional         | Moderate             | 906         | 0-17 (n=6920); 18-49 (n=14571); 50-64 (n=12514); ≥65 (n=11856) | NR         | Non-probability | Residual sera | 3.1% (1.5-4.8%)                                      | Ortho-Clinical Diagnostics; Abbott; Roche   Elecsys Anti-SARS-CoV-2 pan-immunoglobulin immunoassay, ARCHITECT SARS-CoV-2 IgG immunoassay, VIT- ROS SARS-CoV-2 IgG immunoassay   IgG | 0.0%, 0.0% (Used author-adjusted estimate) | 3.1% (2.1-4.4%)                                  |
| Bajema (CDC COVID-19 Response) <sup>331</sup> | 2020-08-12 to 2020-08-26 | Kentucky | Regional         | Moderate             | 1126        | 0-17 (n=6920); 18-49 (n=14571); 50-64 (n=12514); ≥65 (n=11856) | NR         | Non-probability | Residual sera | 3.1% (2.0-4.5%)                                      | Ortho-Clinical Diagnostics; Abbott; Roche   Elecsys Anti-SARS-CoV-2 pan-immunoglobulin immunoassay, ARCHITECT SARS-CoV-2 IgG immunoassay, VIT- ROS SARS-CoV-2 IgG immunoassay   IgG | 0.0%, 0.0% (Used author-adjusted estimate) | 3.1% (2.1-4.1%)                                  |
| Bajema (CDC COVID-19 Response) <sup>331</sup> | 2020-08-10 to 2020-08-26 | Maryland | Regional         | Moderate             | 1174        | 0-17 (n=6920); 18-49 (n=14571); 50-64 (n=12514); ≥65 (n=11856) | NR         | Non-probability | Residual sera | 7.0% (4.9-9.3%)                                      | Ortho-Clinical Diagnostics; Abbott; Roche   Elecsys Anti-SARS-CoV-2 pan-immunoglobulin immunoassay, ARCHITECT SARS-CoV-2 IgG immunoassay, VIT- ROS SARS-CoV-2 IgG                   | 0.0%, 0.0% (Used author-adjusted estimate) | 7.0% (5.6-8.5%)                                  |

| Article Author (Study Organization)           | Sampling Dates (YMD)     | Location   | Geographic Scope | Overall Risk of Bias | Sample Size | Age                                                            | Female (%) | Sampling method | Sample frame  | Uncorrected Seroprevalence (95% Confidence Interval) | Test Manufacturers   Names   Isotypes                                                                                                                                              | Test Sens, Spec (Source)                   | Corrected Seroprevalence (95% Credible Interval) |
|-----------------------------------------------|--------------------------|------------|------------------|----------------------|-------------|----------------------------------------------------------------|------------|-----------------|---------------|------------------------------------------------------|------------------------------------------------------------------------------------------------------------------------------------------------------------------------------------|--------------------------------------------|--------------------------------------------------|
|                                               |                          |            |                  |                      |             |                                                                |            |                 |               |                                                      | immunoassay   IgG                                                                                                                                                                  |                                            |                                                  |
| Bajema (CDC COVID-19 Response) <sup>331</sup> | 2020-08-12 to 2020-08-26 | Nevada     | Regional         | Moderate             | 972         | 0-17 (n=6920); 18-49 (n=14571); 50-64 (n=12514); ≥65 (n=11856) | NR         | Non-probability | Residual sera | 7.9% (6.1-9.8%)                                      | Ortho-Clinical Diagnostics; Abbott; Roche   Elecsys Anti-SARS-CoV-2 pan-immunoglobulin immunoassay, ARCHITECT SARS-CoV-2 IgG immunoassay, VIT-ROS SARS-CoV-2 IgG immunoassay   IgG | 0.0%, 0.0% (Used author-adjusted estimate) | 7.9% (6.3-9.6%)                                  |
| Bajema (CDC COVID-19 Response) <sup>331</sup> | 2020-08-10 to 2020-08-26 | New Jersey | Regional         | Moderate             | 1127        | 0-17 (n=6920); 18-49 (n=14571); 50-64 (n=12514); ≥65 (n=11856) | NR         | Non-probability | Residual sera | 12.2% (10.2-14.5%)                                   | Ortho-Clinical Diagnostics; Abbott; Roche   Elecsys Anti-SARS-CoV-2 pan-immunoglobulin immunoassay, ARCHITECT SARS-CoV-2 IgG immunoassay, VIT-ROS SARS-CoV-2 IgG immunoassay   IgG | 0.0%, 0.0% (Used author-adjusted estimate) | 12.2% (10.3-14.2%)                               |
| Bajema (CDC COVID-19 Response) <sup>331</sup> | 2020-08-10 to 2020-08-26 | New York   | Regional         | Moderate             | 1122        | 0-17 (n=6920); 18-49 (n=14571); 50-64 (n=12514); ≥65 (n=11856) | NR         | Non-probability | Residual sera | 20.6% (18.0-23.1%)                                   | Ortho-Clinical Diagnostics; Abbott; Roche   Elecsys Anti-SARS-CoV-2 pan-immunoglobulin immunoassay, ARCHITECT SARS-CoV-2 IgG                                                       | 0.0%, 0.0% (Used author-adjusted estimate) | 20.6% (18.3-23.0%)                               |

| Article Author (Study Organization)           | Sampling Dates (YMD)     | Location     | Geographic Scope | Overall Risk of Bias | Sample Size | Age                                                             | Female (%) | Sampling method | Sample frame  | Uncorrected Seroprevalence (95% Confidence Interval) | Test Manufacturers   Isotypes                                                                                                                                                       | Test Sens, Spec (Source)                   | Corrected Seroprevalence (95% Credible Interval) |
|-----------------------------------------------|--------------------------|--------------|------------------|----------------------|-------------|-----------------------------------------------------------------|------------|-----------------|---------------|------------------------------------------------------|-------------------------------------------------------------------------------------------------------------------------------------------------------------------------------------|--------------------------------------------|--------------------------------------------------|
|                                               |                          |              |                  |                      |             |                                                                 |            |                 |               |                                                      | immunoassay, VIT- ROS SARS-CoV-2 IgG immunoassay   IgG                                                                                                                              |                                            |                                                  |
| Bajema (CDC COVID-19 Response) <sup>331</sup> | 2020-08-12 to 2020-08-26 | North Dakota | Regional         | High                 | 135         | 0-17 (n=6920); 18-49 (n=14571); 50-64 (n=12514 ); ≥65 (n=11856) | NR         | Non-probability | Residual sera | 0.6% (0.0-1.4%)                                      | Ortho-Clinical Diagnostics; Abbott; Roche   Elecsys Anti-SARS-CoV-2 pan-immunoglobulin immunoassay, ARCHITECT SARS-CoV-2 IgG immunoassay, VIT- ROS SARS-CoV-2 IgG immunoassay   IgG | 0.0%, 0.0% (Used author-adjusted estimate) | 0.6% (0.0-1.8%)                                  |
| Bajema (CDC COVID-19 Response) <sup>331</sup> | 2020-08-10 to 2020-08-26 | Pennsylvania | Regional         | Moderate             | 887         | 0-17 (n=6920); 18-49 (n=14571); 50-64 (n=12514 ); ≥65 (n=11856) | NR         | Non-probability | Residual sera | 10.1% (7.5-13.7%)                                    | Ortho-Clinical Diagnostics; Abbott; Roche   Elecsys Anti-SARS-CoV-2 pan-immunoglobulin immunoassay, ARCHITECT SARS-CoV-2 IgG immunoassay, VIT- ROS SARS-CoV-2 IgG immunoassay   IgG | 0.0%, 0.0% (Used author-adjusted estimate) | 10.1% (8.2-12.1%)                                |
| Bajema (CDC COVID-19 Response) <sup>331</sup> | 2020-08-12 to 2020-08-26 | South Dakota | Regional         | High                 | 83          | 0-17 (n=6920); 18-49 (n=14571); 50-64 (n=12514 ); ≥65 (n=11856) | NR         | Non-probability | Residual sera | 0.0% (0.0-4.3%)                                      | Ortho-Clinical Diagnostics; Abbott; Roche   Elecsys Anti-SARS-CoV-2 pan-immunoglobulin                                                                                              | 0.0%, 0.0% (Used author-adjusted estimate) | 0.0% (0.0-3.0%)                                  |

| Article Author (Study Organization)           | Sampling Dates (YMD)     | Location  | Geographic Scope | Overall Risk of Bias | Sample Size | Age                                                            | Female (%) | Sampling method | Sample frame  | Uncorrected Seroprevalence (95% Confidence Interval) | Test Manufacturers   Names   Isotypes                                                                                                                                               | Test Sens, Spec (Source)                   | Corrected Seroprevalence (95% Credible Interval) |
|-----------------------------------------------|--------------------------|-----------|------------------|----------------------|-------------|----------------------------------------------------------------|------------|-----------------|---------------|------------------------------------------------------|-------------------------------------------------------------------------------------------------------------------------------------------------------------------------------------|--------------------------------------------|--------------------------------------------------|
|                                               |                          |           |                  |                      |             |                                                                |            |                 |               |                                                      | immunoassay, ARCHITECT SARS-CoV-2 IgG<br>immunoassay, VIT- ROS SARS-CoV-2 IgG<br>immunoassay   IgG                                                                                  |                                            |                                                  |
| Bajema (CDC COVID-19 Response) <sup>331</sup> | 2020-08-12 to 2020-08-26 | Tennessee | Regional         | Moderate             | 1029        | 0-17 (n=6920); 18-49 (n=14571); 50-64 (n=12514); ≥65 (n=11856) | NR         | Non-probability | Residual sera | 6.7% (5.1-8.6%)                                      | Ortho-Clinical Diagnostics; Abbott; Roche   Elecsys Anti-SARS-CoV-2 pan-immunoglobulin immunoassay, ARCHITECT SARS-CoV-2 IgG immunoassay, VIT- ROS SARS-CoV-2 IgG immunoassay   IgG | 0.0%, 0.0% (Used author-adjusted estimate) | 6.7% (5.2-8.2%)                                  |
| Bajema (CDC COVID-19 Response) <sup>331</sup> | 2020-08-10 to 2020-08-26 | Virginia  | Regional         | Moderate             | 1243        | 0-17 (n=6920); 18-49 (n=14571); 50-64 (n=12514); ≥65 (n=11856) | NR         | Non-probability | Residual sera | 4.7% (2.5-7.2%)                                      | Ortho-Clinical Diagnostics; Abbott; Roche   Elecsys Anti-SARS-CoV-2 pan-immunoglobulin immunoassay, ARCHITECT SARS-CoV-2 IgG immunoassay, VIT- ROS SARS-CoV-2 IgG immunoassay   IgG | 0.0%, 0.0% (Used author-adjusted estimate) | 4.7% (3.6-5.9%)                                  |
| Bajema (CDC COVID-19 Response) <sup>331</sup> | 2020-08-11 to 2020-08-25 | Arkansas  | Regional         | Moderate             | 998         | 0-17 (n=6920); 18-49 (n=14571); 50-                            | NR         | Non-probability | Residual sera | 3.0% (1.8-4.3%)                                      | Ortho-Clinical Diagnostics; Abbott; Roche   Elecsys Anti-                                                                                                                           | 0.0%, 0.0% (Used author-adjusted estimate) | 3.0% (2.0-4.1%)                                  |

| Article Author (Study Organization)           | Sampling Dates (YMD)     | Location | Geographic Scope | Overall Risk of Bias | Sample Size | Age                                                                      | Female (%) | Sampling method | Sample frame  | Uncorrected Seroprevalence (95% Confidence Interval) | Test Manufacturers   Names   Isotypes                                                                                                                                               | Test Sens, Spec (Source)                   | Corrected Seroprevalence (95% Credible Interval) |
|-----------------------------------------------|--------------------------|----------|------------------|----------------------|-------------|--------------------------------------------------------------------------|------------|-----------------|---------------|------------------------------------------------------|-------------------------------------------------------------------------------------------------------------------------------------------------------------------------------------|--------------------------------------------|--------------------------------------------------|
|                                               |                          |          |                  |                      |             | 64 (n=12514 );<br>≥65 (n=11856)                                          |            |                 |               |                                                      | SARS-CoV-2 pan-immunoglobulin immunoassay, ARCHITECT SARS-CoV-2 IgG immunoassay, VIT- ROS SARS-CoV-2 IgG immunoassay   IgG                                                          |                                            |                                                  |
| Bajema (CDC COVID-19 Response) <sup>331</sup> | 2020-08-10 to 2020-08-25 | Colorado | Regional         | Moderate             | 1019        | 0-17 (n=6920);<br>18-49 (n=14571);<br>50-64 (n=12514 );<br>≥65 (n=11856) | NR         | Non-probability | Residual sera | 3.3% (1.8-4.8%)                                      | Ortho-Clinical Diagnostics; Abbott; Roche   Elecsys Anti-SARS-CoV-2 pan-immunoglobulin immunoassay, ARCHITECT SARS-CoV-2 IgG immunoassay, VIT- ROS SARS-CoV-2 IgG immunoassay   IgG | 0.0%, 0.0% (Used author-adjusted estimate) | 3.3% (2.3-4.5%)                                  |
| Bajema (CDC COVID-19 Response) <sup>331</sup> | 2020-08-11 to 2020-08-25 | Kansas   | Regional         | Moderate             | 1016        | 0-17 (n=6920);<br>18-49 (n=14571);<br>50-64 (n=12514 );<br>≥65 (n=11856) | NR         | Non-probability | Residual sera | 3.7% (2.0-5.5%)                                      | Ortho-Clinical Diagnostics; Abbott; Roche   Elecsys Anti-SARS-CoV-2 pan-immunoglobulin immunoassay, ARCHITECT SARS-CoV-2 IgG immunoassay, VIT- ROS SARS-CoV-2 IgG immunoassay   IgG | 0.0%, 0.0% (Used author-adjusted estimate) | 3.7% (2.6-4.9%)                                  |

| Article Author (Study Organization)           | Sampling Dates (YMD)     | Location  | Geographic Scope | Overall Risk of Bias | Sample Size | Age                                                            | Female (%) | Sampling method | Sample frame  | Uncorrected Seroprevalence (95% Confidence Interval) | Test Manufacturers   Names   Isotypes                                                                                                                                              | Test Sens, Spec (Source)                   | Corrected Seroprevalence (95% Credible Interval) |
|-----------------------------------------------|--------------------------|-----------|------------------|----------------------|-------------|----------------------------------------------------------------|------------|-----------------|---------------|------------------------------------------------------|------------------------------------------------------------------------------------------------------------------------------------------------------------------------------------|--------------------------------------------|--------------------------------------------------|
| Bajema (CDC COVID-19 Response) <sup>331</sup> | 2020-08-12 to 2020-08-25 | Louisiana | Regional         | Moderate             | 989         | 0-17 (n=6920); 18-49 (n=14571); 50-64 (n=12514); ≥65 (n=11856) | NR         | Non-probability | Residual sera | 11.8% (9.3-14.8%)                                    | Ortho-Clinical Diagnostics; Abbott; Roche   Elecsys Anti-SARS-CoV-2 pan-immunoglobulin immunoassay, ARCHITECT SARS-CoV-2 IgG immunoassay, VIT-ROS SARS-CoV-2 IgG immunoassay   IgG | 0.0%, 0.0% (Used author-adjusted estimate) | 11.8% (9.8-13.8%)                                |
| Bajema (CDC COVID-19 Response) <sup>331</sup> | 2020-08-12 to 2020-08-25 | Michigan  | Regional         | Moderate             | 983         | 0-17 (n=6920); 18-49 (n=14571); 50-64 (n=12514); ≥65 (n=11856) | NR         | Non-probability | Residual sera | 4.2% (2.9-5.8%)                                      | Ortho-Clinical Diagnostics; Abbott; Roche   Elecsys Anti-SARS-CoV-2 pan-immunoglobulin immunoassay, ARCHITECT SARS-CoV-2 IgG immunoassay, VIT-ROS SARS-CoV-2 IgG immunoassay   IgG | 0.0%, 0.0% (Used author-adjusted estimate) | 4.2% (3.1-5.6%)                                  |
| Bajema (CDC COVID-19 Response) <sup>331</sup> | 2020-08-11 to 2020-08-25 | Nebraska  | Regional         | Moderate             | 990         | 0-17 (n=6920); 18-49 (n=14571); 50-64 (n=12514); ≥65 (n=11856) | NR         | Non-probability | Residual sera | 7.9% (5.5-10.6%)                                     | Ortho-Clinical Diagnostics; Abbott; Roche   Elecsys Anti-SARS-CoV-2 pan-immunoglobulin immunoassay, ARCHITECT SARS-CoV-2 IgG immunoassay, VIT-ROS SARS-CoV-2 IgG                   | 0.0%, 0.0% (Used author-adjusted estimate) | 7.9% (6.3-9.7%)                                  |

| Article Author (Study Organization)           | Sampling Dates (YMD)     | Location      | Geographic Scope | Overall Risk of Bias | Sample Size | Age                                                            | Female (%) | Sampling method | Sample frame  | Uncorrected Seroprevalence (95% Confidence Interval) | Test Manufacturers   Names   Isotypes                                                                                                                                               | Test Sens, Spec (Source)                   | Corrected Seroprevalence (95% Credible Interval) |
|-----------------------------------------------|--------------------------|---------------|------------------|----------------------|-------------|----------------------------------------------------------------|------------|-----------------|---------------|------------------------------------------------------|-------------------------------------------------------------------------------------------------------------------------------------------------------------------------------------|--------------------------------------------|--------------------------------------------------|
|                                               |                          |               |                  |                      |             |                                                                |            |                 |               |                                                      | immunoassay   IgG                                                                                                                                                                   |                                            |                                                  |
| Bajema (CDC COVID-19 Response) <sup>331</sup> | 2020-08-13 to 2020-08-25 | New Hampshire | Regional         | Moderate             | 1125        | 0-17 (n=6920); 18-49 (n=14571); 50-64 (n=12514); ≥65 (n=11856) | NR         | Non-probability | Residual sera | 0.8% (0.3-1.2%)                                      | Ortho-Clinical Diagnostics; Abbott; Roche   Elecsys Anti-SARS-CoV-2 pan-immunoglobulin immunoassay, ARCHITECT SARS-CoV-2 IgG immunoassay, VIT- ROS SARS-CoV-2 IgG immunoassay   IgG | 0.0%, 0.0% (Used author-adjusted estimate) | 0.8% (0.4-1.5%)                                  |
| Bajema (CDC COVID-19 Response) <sup>331</sup> | 2020-08-15 to 2020-08-25 | Utah          | Regional         | Moderate             | 871         | 0-17 (n=6920); 18-49 (n=14571); 50-64 (n=12514); ≥65 (n=11856) | NR         | Non-probability | Residual sera | 5.5% (2.9-8.7%)                                      | Ortho-Clinical Diagnostics; Abbott; Roche   Elecsys Anti-SARS-CoV-2 pan-immunoglobulin immunoassay, ARCHITECT SARS-CoV-2 IgG immunoassay, VIT- ROS SARS-CoV-2 IgG immunoassay   IgG | 0.0%, 0.0% (Used author-adjusted estimate) | 5.5% (4.0-7.0%)                                  |
| Bajema (CDC COVID-19 Response) <sup>331</sup> | 2020-08-11 to 2020-08-24 | Connecticut   | Regional         | Moderate             | 983         | 0-17 (n=6920); 18-49 (n=14571); 50-64 (n=12514); ≥65 (n=11856) | NR         | Non-probability | Residual sera | 2.4% (1.4-3.5%)                                      | Ortho-Clinical Diagnostics; Abbott; Roche   Elecsys Anti-SARS-CoV-2 pan-immunoglobulin immunoassay, ARCHITECT SARS-CoV-2 IgG                                                        | 0.0%, 0.0% (Used author-adjusted estimate) | 2.4% (1.5-3.4%)                                  |

| Article Author (Study Organization)           | Sampling Dates (YMD)     | Location | Geographic Scope | Overall Risk of Bias | Sample Size | Age                                                            | Female (%) | Sampling method | Sample frame  | Uncorrected Seroprevalence (95% Confidence Interval) | Test Manufacturers   Names   Isotypes                                                                                                                                               | Test Sens, Spec (Source)                   | Corrected Seroprevalence (95% Credible Interval) |
|-----------------------------------------------|--------------------------|----------|------------------|----------------------|-------------|----------------------------------------------------------------|------------|-----------------|---------------|------------------------------------------------------|-------------------------------------------------------------------------------------------------------------------------------------------------------------------------------------|--------------------------------------------|--------------------------------------------------|
|                                               |                          |          |                  |                      |             |                                                                |            |                 |               |                                                      | immunoassay, VIT- ROS SARS-CoV-2 IgG<br>immunoassay   IgG                                                                                                                           |                                            |                                                  |
| Bajema (CDC COVID-19 Response) <sup>331</sup> | 2020-08-12 to 2020-08-24 | Montana  | Regional         | High                 | 383         | 0-17 (n=6920); 18-49 (n=14571); 50-64 (n=12514); ≥65 (n=11856) | NR         | Non-probability | Residual sera | 1.3% (0.4-2.5%)                                      | Ortho-Clinical Diagnostics; Abbott; Roche   Elecsys Anti-SARS-CoV-2 pan-immunoglobulin immunoassay, ARCHITECT SARS-CoV-2 IgG immunoassay, VIT- ROS SARS-CoV-2 IgG immunoassay   IgG | 0.0%, 0.0% (Used author-adjusted estimate) | 1.3% (0.4-2.5%)                                  |
| Bajema (CDC COVID-19 Response) <sup>331</sup> | 2020-08-12 to 2020-08-24 | Texas    | Regional         | Moderate             | 1001        | 0-17 (n=6920); 18-49 (n=14571); 50-64 (n=12514); ≥65 (n=11856) | NR         | Non-probability | Residual sera | 6.5% (4.7-8.5%)                                      | Ortho-Clinical Diagnostics; Abbott; Roche   Elecsys Anti-SARS-CoV-2 pan-immunoglobulin immunoassay, ARCHITECT SARS-CoV-2 IgG immunoassay, VIT- ROS SARS-CoV-2 IgG immunoassay   IgG | 0.0%, 0.0% (Used author-adjusted estimate) | 6.5% (5.1-8.1%)                                  |
| Bajema (CDC COVID-19 Response) <sup>331</sup> | 2020-08-13 to 2020-08-24 | Wyoming  | Regional         | High                 | 86          | 0-17 (n=6920); 18-49 (n=14571); 50-64 (n=12514); ≥65 (n=11856) | NR         | Non-probability | Residual sera | 0.8% (0.0-3.1%)                                      | Ortho-Clinical Diagnostics; Abbott; Roche   Elecsys Anti-SARS-CoV-2 pan-immunoglobulin                                                                                              | 0.0%, 0.0% (Used author-adjusted estimate) | 0.8% (0.0-2.9%)                                  |



| Article Author (Study Organization)           | Sampling Dates (YMD)     | Location   | Geographic Scope | Overall Risk of Bias | Sample Size | Age                                                            | Female (%) | Sampling method | Sample frame  | Uncorrected Seroprevalence (95% Confidence Interval) | Test Manufacturers   Names   Isotypes                                                                                                                                               | Test Sens, Spec (Source)                   | Corrected Seroprevalence (95% Credible Interval) |
|-----------------------------------------------|--------------------------|------------|------------------|----------------------|-------------|----------------------------------------------------------------|------------|-----------------|---------------|------------------------------------------------------|-------------------------------------------------------------------------------------------------------------------------------------------------------------------------------------|--------------------------------------------|--------------------------------------------------|
|                                               |                          |            |                  |                      |             |                                                                |            |                 |               |                                                      | immunoassay, ARCHITECT SARS-CoV-2 IgG<br>immunoassay, VIT- ROS SARS-CoV-2 IgG<br>immunoassay   IgG                                                                                  |                                            |                                                  |
| Bajema (CDC COVID-19 Response) <sup>331</sup> | 2020-08-12 to 2020-08-21 | Missouri   | Regional         | Moderate             | 1021        | 0-17 (n=6920); 18-49 (n=14571); 50-64 (n=12514); ≥65 (n=11856) | NR         | Non-probability | Residual sera | 3.5% (2.2-5.1%)                                      | Ortho-Clinical Diagnostics; Abbott; Roche   Elecsys Anti-SARS-CoV-2 pan-immunoglobulin immunoassay, ARCHITECT SARS-CoV-2 IgG immunoassay, VIT- ROS SARS-CoV-2 IgG immunoassay   IgG | 0.0%, 0.0% (Used author-adjusted estimate) | 3.5% (2.4-4.7%)                                  |
| Bajema (CDC COVID-19 Response) <sup>331</sup> | 2020-08-13 to 2020-08-19 | California | Regional         | Moderate             | 980         | 0-17 (n=6920); 18-49 (n=14571); 50-64 (n=12514); ≥65 (n=11856) | NR         | Non-probability | Residual sera | 4.3% (2.9-6.1%)                                      | Ortho-Clinical Diagnostics; Abbott; Roche   Elecsys Anti-SARS-CoV-2 pan-immunoglobulin immunoassay, ARCHITECT SARS-CoV-2 IgG immunoassay, VIT- ROS SARS-CoV-2 IgG immunoassay   IgG | 0.0%, 0.0% (Used author-adjusted estimate) | 4.3% (3.1-5.7%)                                  |
| Bajema (CDC COVID-19 Response) <sup>331</sup> | 2020-08-10 to 2020-08-18 | Oklahoma   | Regional         | Moderate             | 979         | 0-17 (n=6920); 18-49 (n=14571); 50-                            | NR         | Non-probability | Residual sera | 4.0% (2.7-5.5%)                                      | Ortho-Clinical Diagnostics; Abbott; Roche   Elecsys Anti-                                                                                                                           | 0.0%, 0.0% (Used author-adjusted estimate) | 4.0% (2.9-5.3%)                                  |

| Article Author (Study Organization)                       | Sampling Dates (YMD)     | Location    | Geographic Scope | Overall Risk of Bias | Sample Size | Age                                                                      | Female (%) | Sampling method | Sample frame                    | Uncorrected Seroprevalence (95% Confidence Interval) | Test Manufacturers   Names   Isotypes                                                                                                                                               | Test Sens, Spec (Source)                               | Corrected Seroprevalence (95% Credible Interval) |
|-----------------------------------------------------------|--------------------------|-------------|------------------|----------------------|-------------|--------------------------------------------------------------------------|------------|-----------------|---------------------------------|------------------------------------------------------|-------------------------------------------------------------------------------------------------------------------------------------------------------------------------------------|--------------------------------------------------------|--------------------------------------------------|
|                                                           |                          |             |                  |                      |             | 64 (n=12514 );<br>≥65 (n=11856)                                          |            |                 |                                 |                                                      | SARS-CoV-2 pan-immunoglobulin immunoassay, ARCHITECT SARS-CoV-2 IgG immunoassay, VIT- ROS SARS-CoV-2 IgG immunoassay   IgG                                                          |                                                        |                                                  |
| Bajema (CDC COVID-19 Response) <sup>331</sup>             | 2020-08-10 to 2020-08-17 | Puerto Rico | Regional         | Moderate             | 986         | 0-17 (n=6920);<br>18-49 (n=14571);<br>50-64 (n=12514 );<br>≥65 (n=11856) | NR         | Non-probability | Residual sera                   | 2.2% (1.2-3.3%)                                      | Ortho-Clinical Diagnostics; Abbott; Roche   Elecsys Anti-SARS-CoV-2 pan-immunoglobulin immunoassay, ARCHITECT SARS-CoV-2 IgG immunoassay, VIT- ROS SARS-CoV-2 IgG immunoassay   IgG | 0.0%, 0.0% (Used author-adjusted estimate)             | 2.2% (1.4-3.2%)                                  |
| Bruckner (University of California Irvine) <sup>336</sup> | 2020-07-10 to 2020-08-16 | California  | Local            | Low                  | 2979        | 18-34 (n=673),<br>35-54 (n=1362),<br>55+ (n=944)                         | 56.4       | Probability     | Household and community samples | 11.5% (10.5-12.4%)                                   | NR   coronavirus antigen microarray (CoVAM)   IgG, IgM                                                                                                                              | 94.0%, 100.0% (Author-reported independent evaluation) | 11.5% (8.8-13.6%)                                |
| Heim (UW-Madison) <sup>339</sup>                          | 2020-07-15 to 2020-08-15 | Wisconsin   | Regional         | Unclear              | 1056        | NR                                                                       | NR         | Probability     | Household and community samples | 1.6%                                                 | NR   NR   NR                                                                                                                                                                        | No data                                                | -                                                |
| Bajema (CDC COVID-19 Response) <sup>331</sup>             | 2020-08-14 to 2020-08-14 | Florida     | Regional         | Moderate             | 978         | 0-17 (n=6920);<br>18-49 (n=14571);<br>50-64 (n=12514 );<br>≥65 (n=11856) | NR         | Non-probability | Residual sera                   | 4.5% (3.1-6.1%)                                      | Ortho-Clinical Diagnostics; Abbott; Roche   Elecsys Anti-SARS-CoV-2 pan-                                                                                                            | 0.0%, 0.0% (Used author-adjusted estimate)             | 4.5% (3.3-5.9%)                                  |

| Article Author (Study Organization)           | Sampling Dates (YMD)     | Location | Geographic Scope | Overall Risk of Bias | Sample Size | Age                                                            | Female (%) | Sampling method | Sample frame  | Uncorrected Seroprevalence (95% Confidence Interval) | Test Manufacturers   Names   Isotypes                                                                                                                                               | Test Sens, Spec (Source)                   | Corrected Seroprevalence (95% Credible Interval) |
|-----------------------------------------------|--------------------------|----------|------------------|----------------------|-------------|----------------------------------------------------------------|------------|-----------------|---------------|------------------------------------------------------|-------------------------------------------------------------------------------------------------------------------------------------------------------------------------------------|--------------------------------------------|--------------------------------------------------|
|                                               |                          |          |                  |                      |             |                                                                |            |                 |               |                                                      | immunoglobulin immunoassay, ARCHITECT SARS-CoV-2 IgG immunoassay, VIT- ROS SARS-CoV-2 IgG immunoassay   IgG                                                                         |                                            |                                                  |
| Bajema (CDC COVID-19 Response) <sup>331</sup> | 2020-07-29 to 2020-08-13 | Alabama  | Regional         | Moderate             | 938         | 0-17 (n=6700); 18-49 (n=11237); 50-64 (n=10367); ≥65 (n=10408) | NR         | Non-probability | Residual sera | 5.8% (4.2-7.7%)                                      | Ortho-Clinical Diagnostics; Abbott; Roche   Elecsys Anti-SARS-CoV-2 pan-immunoglobulin immunoassay, ARCHITECT SARS-CoV-2 IgG immunoassay, VIT- ROS SARS-CoV-2 IgG immunoassay   IgG | 0.0%, 0.0% (Used author-adjusted estimate) | 5.8% (4.4-7.4%)                                  |
| Bajema (CDC COVID-19 Response) <sup>331</sup> | 2020-07-29 to 2020-08-13 | Arkansas | Regional         | Moderate             | 937         | 0-17 (n=6700); 18-49 (n=11237); 50-64 (n=10367); ≥65 (n=10408) | NR         | Non-probability | Residual sera | 4.1% (2.7-5.6%)                                      | Ortho-Clinical Diagnostics; Abbott; Roche   Elecsys Anti-SARS-CoV-2 pan-immunoglobulin immunoassay, ARCHITECT SARS-CoV-2 IgG immunoassay, VIT- ROS SARS-CoV-2 IgG immunoassay   IgG | 0.0%, 0.0% (Used author-adjusted estimate) | 4.1% (2.9-5.5%)                                  |

| Article Author (Study Organization)           | Sampling Dates (YMD)     | Location | Geographic Scope | Overall Risk of Bias | Sample Size | Age                                                            | Female (%) | Sampling method | Sample frame  | Uncorrected Seroprevalence (95% Confidence Interval) | Test Manufacturers   Names   Isotypes                                                                                                                                               | Test Sens, Spec (Source)                   | Corrected Seroprevalence (95% Credible Interval) |
|-----------------------------------------------|--------------------------|----------|------------------|----------------------|-------------|----------------------------------------------------------------|------------|-----------------|---------------|------------------------------------------------------|-------------------------------------------------------------------------------------------------------------------------------------------------------------------------------------|--------------------------------------------|--------------------------------------------------|
| Bajema (CDC COVID-19 Response) <sup>331</sup> | 2020-07-29 to 2020-08-13 | Delaware | Regional         | Moderate             | 804         | 0-17 (n=6700); 18-49 (n=11237); 50-64 (n=10367); ≥65 (n=10408) | NR         | Non-probability | Residual sera | 5.7% (3.5-8.2%)                                      | Ortho-Clinical Diagnostics; Abbott; Roche   Elecsys Anti-SARS-CoV-2 pan-immunoglobulin immunoassay, ARCHITECT SARS-CoV-2 IgG immunoassay, VIT- ROS SARS-CoV-2 IgG immunoassay   IgG | 0.0%, 0.0% (Used author-adjusted estimate) | 5.7% (4.2-7.3%)                                  |
| Bajema (CDC COVID-19 Response) <sup>331</sup> | 2020-07-29 to 2020-08-13 | Iowa     | Regional         | Moderate             | 811         | 0-17 (n=6700); 18-49 (n=11237); 50-64 (n=10367); ≥65 (n=10408) | NR         | Non-probability | Residual sera | 8.6% (6.0-11.3%)                                     | Ortho-Clinical Diagnostics; Abbott; Roche   Elecsys Anti-SARS-CoV-2 pan-immunoglobulin immunoassay, ARCHITECT SARS-CoV-2 IgG immunoassay, VIT- ROS SARS-CoV-2 IgG immunoassay   IgG | 0.0%, 0.0% (Used author-adjusted estimate) | 8.6% (6.7-10.6%)                                 |
| Bajema (CDC COVID-19 Response) <sup>331</sup> | 2020-07-30 to 2020-08-13 | Kentucky | Regional         | Moderate             | 975         | 0-17 (n=6700); 18-49 (n=11237); 50-64 (n=10367); ≥65 (n=10408) | NR         | Non-probability | Residual sera | 2.4% (1.3-3.6%)                                      | Ortho-Clinical Diagnostics; Abbott; Roche   Elecsys Anti-SARS-CoV-2 pan-immunoglobulin immunoassay, ARCHITECT SARS-CoV-2 IgG immunoassay, VIT- ROS SARS-CoV-2 IgG                   | 0.0%, 0.0% (Used author-adjusted estimate) | 2.4% (1.5-3.5%)                                  |

| Article Author (Study Organization)           | Sampling Dates (YMD)     | Location    | Geographic Scope | Overall Risk of Bias | Sample Size | Age                                                            | Female (%) | Sampling method | Sample frame  | Uncorrected Seroprevalence (95% Confidence Interval) | Test Manufacturers   Names   Isotypes                                                                                                                                              | Test Sens, Spec (Source)                   | Corrected Seroprevalence (95% Credible Interval) |
|-----------------------------------------------|--------------------------|-------------|------------------|----------------------|-------------|----------------------------------------------------------------|------------|-----------------|---------------|------------------------------------------------------|------------------------------------------------------------------------------------------------------------------------------------------------------------------------------------|--------------------------------------------|--------------------------------------------------|
|                                               |                          |             |                  |                      |             |                                                                |            |                 |               |                                                      | immunoassay   IgG                                                                                                                                                                  |                                            |                                                  |
| Bajema (CDC COVID-19 Response) <sup>331</sup> | 2020-07-28 to 2020-08-13 | Louisiana   | Regional         | Moderate             | 1002        | 0-17 (n=6700); 18-49 (n=11237); 50-64 (n=10367); ≥65 (n=10408) | NR         | Non-probability | Residual sera | 9.6% (6.9-12.3%)                                     | Ortho-Clinical Diagnostics; Abbott; Roche   Elecsys Anti-SARS-CoV-2 pan-immunoglobulin immunoassay, ARCHITECT SARS-CoV-2 IgG immunoassay, VIT-ROS SARS-CoV-2 IgG immunoassay   IgG | 0.0%, 0.0% (Used author-adjusted estimate) | 9.6% (7.9-11.5%)                                 |
| Bajema (CDC COVID-19 Response) <sup>331</sup> | 2020-07-29 to 2020-08-13 | Minnesota   | Regional         | Moderate             | 879         | 0-17 (n=6700); 18-49 (n=11237); 50-64 (n=10367); ≥65 (n=10408) | NR         | Non-probability | Residual sera | 3.5% (2.1-5.0%)                                      | Ortho-Clinical Diagnostics; Abbott; Roche   Elecsys Anti-SARS-CoV-2 pan-immunoglobulin immunoassay, ARCHITECT SARS-CoV-2 IgG immunoassay, VIT-ROS SARS-CoV-2 IgG immunoassay   IgG | 0.0%, 0.0% (Used author-adjusted estimate) | 3.5% (2.4-4.8%)                                  |
| Bajema (CDC COVID-19 Response) <sup>331</sup> | 2020-07-30 to 2020-08-13 | Mississippi | Regional         | Moderate             | 769         | 0-17 (n=6700); 18-49 (n=11237); 50-64 (n=10367); ≥65 (n=10408) | NR         | Non-probability | Residual sera | 7.1% (3.8-11.1%)                                     | Ortho-Clinical Diagnostics; Abbott; Roche   Elecsys Anti-SARS-CoV-2 pan-immunoglobulin immunoassay, ARCHITECT SARS-CoV-2 IgG                                                       | 0.0%, 0.0% (Used author-adjusted estimate) | 7.1% (5.4-9.0%)                                  |

| Article Author (Study Organization)           | Sampling Dates (YMD)     | Location       | Geographic Scope | Overall Risk of Bias | Sample Size | Age                                                            | Female (%) | Sampling method | Sample frame  | Uncorrected Seroprevalence (95% Confidence Interval) | Test Manufacturers   Names   Isotypes                                                                                                                                               | Test Sens, Spec (Source)                   | Corrected Seroprevalence (95% Credible Interval) |
|-----------------------------------------------|--------------------------|----------------|------------------|----------------------|-------------|----------------------------------------------------------------|------------|-----------------|---------------|------------------------------------------------------|-------------------------------------------------------------------------------------------------------------------------------------------------------------------------------------|--------------------------------------------|--------------------------------------------------|
|                                               |                          |                |                  |                      |             |                                                                |            |                 |               |                                                      | immunoassay, VIT- ROS SARS-CoV-2 IgG<br>immunoassay   IgG                                                                                                                           |                                            |                                                  |
| Bajema (CDC COVID-19 Response) <sup>331</sup> | 2020-07-28 to 2020-08-13 | Nebraska       | Regional         | Moderate             | 954         | 0-17 (n=6700); 18-49 (n=11237); 50-64 (n=10367); ≥65 (n=10408) | NR         | Non-probability | Residual sera | 7.4% (5.2-9.8%)                                      | Ortho-Clinical Diagnostics; Abbott; Roche   Elecsys Anti-SARS-CoV-2 pan-immunoglobulin immunoassay, ARCHITECT SARS-CoV-2 IgG immunoassay, VIT- ROS SARS-CoV-2 IgG immunoassay   IgG | 0.0%, 0.0% (Used author-adjusted estimate) | 7.4% (5.8-9.1%)                                  |
| Bajema (CDC COVID-19 Response) <sup>331</sup> | 2020-07-29 to 2020-08-13 | New Mexico     | Regional         | Moderate             | 964         | 0-17 (n=6700); 18-49 (n=11237); 50-64 (n=10367); ≥65 (n=10408) | NR         | Non-probability | Residual sera | 2.0% (1.1-3.0%)                                      | Ortho-Clinical Diagnostics; Abbott; Roche   Elecsys Anti-SARS-CoV-2 pan-immunoglobulin immunoassay, ARCHITECT SARS-CoV-2 IgG immunoassay, VIT- ROS SARS-CoV-2 IgG immunoassay   IgG | 0.0%, 0.0% (Used author-adjusted estimate) | 2.0% (1.2-3.0%)                                  |
| Bajema (CDC COVID-19 Response) <sup>331</sup> | 2020-07-30 to 2020-08-13 | South Carolina | Regional         | Moderate             | 840         | 0-17 (n=6700); 18-49 (n=11237); 50-64 (n=10367); ≥65 (n=10408) | NR         | Non-probability | Residual sera | 8.1% (5.8-10.7%)                                     | Ortho-Clinical Diagnostics; Abbott; Roche   Elecsys Anti-SARS-CoV-2 pan-immunoglobulin                                                                                              | 0.0%, 0.0% (Used author-adjusted estimate) | 8.1% (6.4-10.1%)                                 |

| Article Author (Study Organization)           | Sampling Dates (YMD)     | Location        | Geographic Scope | Overall Risk of Bias | Sample Size | Age                                                            | Female (%) | Sampling method | Sample frame  | Uncorrected Seroprevalence (95% Confidence Interval) | Test Manufacturers   Names   Isotypes                                                                                                                                               | Test Sens, Spec (Source)                   | Corrected Seroprevalence (95% Credible Interval) |
|-----------------------------------------------|--------------------------|-----------------|------------------|----------------------|-------------|----------------------------------------------------------------|------------|-----------------|---------------|------------------------------------------------------|-------------------------------------------------------------------------------------------------------------------------------------------------------------------------------------|--------------------------------------------|--------------------------------------------------|
|                                               |                          |                 |                  |                      |             |                                                                |            |                 |               |                                                      | immunoassay, ARCHITECT SARS-CoV-2 IgG<br>immunoassay, VIT- ROS SARS-CoV-2 IgG<br>immunoassay   IgG                                                                                  |                                            |                                                  |
| Bajema (CDC COVID-19 Response) <sup>331</sup> | 2020-07-30 to 2020-08-13 | Washington D.C. | Regional         | Moderate             | 717         | 0-17 (n=6700); 18-49 (n=11237); 50-64 (n=10367); ≥65 (n=10408) | NR         | Non-probability | Residual sera | 3.9% (2.2-5.8%)                                      | Ortho-Clinical Diagnostics; Abbott; Roche   Elecsys Anti-SARS-CoV-2 pan-immunoglobulin immunoassay, ARCHITECT SARS-CoV-2 IgG immunoassay, VIT- ROS SARS-CoV-2 IgG immunoassay   IgG | 0.0%, 0.0% (Used author-adjusted estimate) | 3.9% (2.6-5.4%)                                  |
| Bajema (CDC COVID-19 Response) <sup>331</sup> | 2020-07-30 to 2020-08-13 | West Virginia   | Regional         | High                 | 317         | 0-17 (n=6700); 18-49 (n=11237); 50-64 (n=10367); ≥65 (n=10408) | NR         | Non-probability | Residual sera | 1.2% (0.2-2.5%)                                      | Ortho-Clinical Diagnostics; Abbott; Roche   Elecsys Anti-SARS-CoV-2 pan-immunoglobulin immunoassay, ARCHITECT SARS-CoV-2 IgG immunoassay, VIT- ROS SARS-CoV-2 IgG immunoassay   IgG | 0.0%, 0.0% (Used author-adjusted estimate) | 1.2% (0.3-2.5%)                                  |
| Bajema (CDC COVID-19 Response) <sup>331</sup> | 2020-07-30 to 2020-08-13 | Wisconsin       | Regional         | Moderate             | 814         | 0-17 (n=6700); 18-49 (n=11237); 50-                            | NR         | Non-probability | Residual sera | 1.8% (0.8-3.2%)                                      | Ortho-Clinical Diagnostics; Abbott; Roche   Elecsys Anti-                                                                                                                           | 0.0%, 0.0% (Used author-adjusted estimate) | 1.8% (1.0-2.8%)                                  |

| Article Author (Study Organization)           | Sampling Dates (YMD)     | Location     | Geographic Scope | Overall Risk of Bias | Sample Size | Age                                                            | Female (%) | Sampling method | Sample frame  | Uncorrected Seroprevalence (95% Confidence Interval) | Test Manufacturers   Names   Isotypes                                                                                                                                               | Test Sens, Spec (Source)                   | Corrected Seroprevalence (95% Credible Interval) |
|-----------------------------------------------|--------------------------|--------------|------------------|----------------------|-------------|----------------------------------------------------------------|------------|-----------------|---------------|------------------------------------------------------|-------------------------------------------------------------------------------------------------------------------------------------------------------------------------------------|--------------------------------------------|--------------------------------------------------|
|                                               |                          |              |                  |                      |             | 64 (n=10367); ≥65 (n=10408)                                    |            |                 |               |                                                      | SARS-CoV-2 pan-immunoglobulin immunoassay, ARCHITECT SARS-CoV-2 IgG immunoassay, VIT- ROS SARS-CoV-2 IgG immunoassay   IgG                                                          |                                            |                                                  |
| Bajema (CDC COVID-19 Response) <sup>331</sup> | 2020-07-29 to 2020-08-12 | North Dakota | Regional         | High                 | 121         | 0-17 (n=6700); 18-49 (n=11237); 50-64 (n=10367); ≥65 (n=10408) | NR         | Non-probability | Residual sera | 7.3% (1.3-14.3%)                                     | Ortho-Clinical Diagnostics; Abbott; Roche   Elecsys Anti-SARS-CoV-2 pan-immunoglobulin immunoassay, ARCHITECT SARS-CoV-2 IgG immunoassay, VIT- ROS SARS-CoV-2 IgG immunoassay   IgG | 0.0%, 0.0% (Used author-adjusted estimate) | 7.3% (3.2-12.1%)                                 |
| Bajema (CDC COVID-19 Response) <sup>331</sup> | 2020-08-06 to 2020-08-11 | Alaska       | Regional         | High                 | 242         | 0-17 (n=6700); 18-49 (n=11237); 50-64 (n=10367); ≥65 (n=10408) | NR         | Non-probability | Residual sera | 0.3% (0.0-1.1%)                                      | Ortho-Clinical Diagnostics; Abbott; Roche   Elecsys Anti-SARS-CoV-2 pan-immunoglobulin immunoassay, ARCHITECT SARS-CoV-2 IgG immunoassay, VIT- ROS SARS-CoV-2 IgG immunoassay   IgG | 0.0%, 0.0% (Used author-adjusted estimate) | 0.3% (0.0-1.0%)                                  |



| Article Author (Study Organization)           | Sampling Dates (YMD)     | Location | Geographic Scope | Overall Risk of Bias | Sample Size | Age                                                            | Female (%) | Sampling method | Sample frame  | Uncorrected Seroprevalence (95% Confidence Interval) | Test Manufacturers   Names   Isotypes                                                                                                                                               | Test Sens, Spec (Source)                   | Corrected Seroprevalence (95% Credible Interval) |
|-----------------------------------------------|--------------------------|----------|------------------|----------------------|-------------|----------------------------------------------------------------|------------|-----------------|---------------|------------------------------------------------------|-------------------------------------------------------------------------------------------------------------------------------------------------------------------------------------|--------------------------------------------|--------------------------------------------------|
| Bajema (CDC COVID-19 Response) <sup>331</sup> | 2020-07-31 to 2020-08-11 | Arizona  | Regional         | High                 | 591         | 0-17 (n=6700); 18-49 (n=11237); 50-64 (n=10367); ≥65 (n=10408) | NR         | Non-probability | Residual sera | 8.2% (4.1-13.6%)                                     | Ortho-Clinical Diagnostics; Abbott; Roche   Elecsys Anti-SARS-CoV-2 pan-immunoglobulin immunoassay, ARCHITECT SARS-CoV-2 IgG immunoassay, VIT- ROS SARS-CoV-2 IgG immunoassay   IgG | 0.0%, 0.0% (Used author-adjusted estimate) | 8.2% (6.1-10.5%)                                 |
| Bajema (CDC COVID-19 Response) <sup>331</sup> | 2020-08-02 to 2020-08-11 | Georgia  | Regional         | Moderate             | 985         | 0-17 (n=6700); 18-49 (n=11237); 50-64 (n=10367); ≥65 (n=10408) | NR         | Non-probability | Residual sera | 6.8% (4.8-8.8%)                                      | Ortho-Clinical Diagnostics; Abbott; Roche   Elecsys Anti-SARS-CoV-2 pan-immunoglobulin immunoassay, ARCHITECT SARS-CoV-2 IgG immunoassay, VIT- ROS SARS-CoV-2 IgG immunoassay   IgG | 0.0%, 0.0% (Used author-adjusted estimate) | 6.8% (5.3-8.4%)                                  |
| Bajema (CDC COVID-19 Response) <sup>331</sup> | 2020-08-04 to 2020-08-11 | Idaho    | Regional         | High                 | 246         | 0-17 (n=6700); 18-49 (n=11237); 50-64 (n=10367); ≥65 (n=10408) | NR         | Non-probability | Residual sera | 4.5% (1.8-8.0%)                                      | Ortho-Clinical Diagnostics; Abbott; Roche   Elecsys Anti-SARS-CoV-2 pan-immunoglobulin immunoassay, ARCHITECT SARS-CoV-2 IgG immunoassay, VIT- ROS SARS-CoV-2 IgG                   | 0.0%, 0.0% (Used author-adjusted estimate) | 4.5% (2.4-7.6%)                                  |

| Article Author (Study Organization)           | Sampling Dates (YMD)     | Location | Geographic Scope | Overall Risk of Bias | Sample Size | Age                                                            | Female (%) | Sampling method | Sample frame  | Uncorrected Seroprevalence (95% Confidence Interval) | Test Manufacturers   Names   Isotypes                                                                                                                                              | Test Sens, Spec (Source)                   | Corrected Seroprevalence (95% Credible Interval) |
|-----------------------------------------------|--------------------------|----------|------------------|----------------------|-------------|----------------------------------------------------------------|------------|-----------------|---------------|------------------------------------------------------|------------------------------------------------------------------------------------------------------------------------------------------------------------------------------------|--------------------------------------------|--------------------------------------------------|
|                                               |                          |          |                  |                      |             |                                                                |            |                 |               |                                                      | immunoassay   IgG                                                                                                                                                                  |                                            |                                                  |
| Bajema (CDC COVID-19 Response) <sup>331</sup> | 2020-07-31 to 2020-08-11 | Indiana  | Regional         | High                 | 579         | 0-17 (n=6700); 18-49 (n=11237); 50-64 (n=10367); ≥65 (n=10408) | NR         | Non-probability | Residual sera | 2.2% (1.1-3.6%)                                      | Ortho-Clinical Diagnostics; Abbott; Roche   Elecsys Anti-SARS-CoV-2 pan-immunoglobulin immunoassay, ARCHITECT SARS-CoV-2 IgG immunoassay, VIT-ROS SARS-CoV-2 IgG immunoassay   IgG | 0.0%, 0.0% (Used author-adjusted estimate) | 2.2% (1.1-3.5%)                                  |
| Bajema (CDC COVID-19 Response) <sup>331</sup> | 2020-07-30 to 2020-08-11 | Maine    | Regional         | High                 | 598         | 0-17 (n=6700); 18-49 (n=11237); 50-64 (n=10367); ≥65 (n=10408) | NR         | Non-probability | Residual sera | 0.5% (0.0-1.2%)                                      | Ortho-Clinical Diagnostics; Abbott; Roche   Elecsys Anti-SARS-CoV-2 pan-immunoglobulin immunoassay, ARCHITECT SARS-CoV-2 IgG immunoassay, VIT-ROS SARS-CoV-2 IgG immunoassay   IgG | 0.0%, 0.0% (Used author-adjusted estimate) | 0.5% (0.1-1.1%)                                  |
| Bajema (CDC COVID-19 Response) <sup>331</sup> | 2020-07-31 to 2020-08-11 | Maryland | Regional         | Moderate             | 783         | 0-17 (n=6700); 18-49 (n=11237); 50-64 (n=10367); ≥65 (n=10408) | NR         | Non-probability | Residual sera | 9.7% (7.3-12.9%)                                     | Ortho-Clinical Diagnostics; Abbott; Roche   Elecsys Anti-SARS-CoV-2 pan-immunoglobulin immunoassay, ARCHITECT SARS-CoV-2 IgG                                                       | 0.0%, 0.0% (Used author-adjusted estimate) | 9.7% (7.7-11.8%)                                 |

| Article Author (Study Organization)           | Sampling Dates (YMD)     | Location      | Geographic Scope | Overall Risk of Bias | Sample Size | Age                                                            | Female (%) | Sampling method | Sample frame  | Uncorrected Seroprevalence (95% Confidence Interval) | Test Manufacturers   Names   Isotypes                                                                                                                                               | Test Sens, Spec (Source)                   | Corrected Seroprevalence (95% Credible Interval) |
|-----------------------------------------------|--------------------------|---------------|------------------|----------------------|-------------|----------------------------------------------------------------|------------|-----------------|---------------|------------------------------------------------------|-------------------------------------------------------------------------------------------------------------------------------------------------------------------------------------|--------------------------------------------|--------------------------------------------------|
|                                               |                          |               |                  |                      |             |                                                                |            |                 |               |                                                      | immunoassay, VIT- ROS SARS-CoV-2 IgG immunoassay   IgG                                                                                                                              |                                            |                                                  |
| Bajema (CDC COVID-19 Response) <sup>331</sup> | 2020-07-30 to 2020-08-11 | Michigan      | Regional         | Moderate             | 982         | 0-17 (n=6700); 18-49 (n=11237); 50-64 (n=10367); ≥65 (n=10408) | NR         | Non-probability | Residual sera | 3.4% (2.2-4.8%)                                      | Ortho-Clinical Diagnostics; Abbott; Roche   Elecsys Anti-SARS-CoV-2 pan-immunoglobulin immunoassay, ARCHITECT SARS-CoV-2 IgG immunoassay, VIT- ROS SARS-CoV-2 IgG immunoassay   IgG | 0.0%, 0.0% (Used author-adjusted estimate) | 3.4% (2.4-4.6%)                                  |
| Bajema (CDC COVID-19 Response) <sup>331</sup> | 2020-07-30 to 2020-08-11 | New Hampshire | Regional         | Moderate             | 809         | 0-17 (n=6700); 18-49 (n=11237); 50-64 (n=10367); ≥65 (n=10408) | NR         | Non-probability | Residual sera | 0.8% (0.2-1.5%)                                      | Ortho-Clinical Diagnostics; Abbott; Roche   Elecsys Anti-SARS-CoV-2 pan-immunoglobulin immunoassay, ARCHITECT SARS-CoV-2 IgG immunoassay, VIT- ROS SARS-CoV-2 IgG immunoassay   IgG | 0.0%, 0.0% (Used author-adjusted estimate) | 0.8% (0.3-1.5%)                                  |
| Bajema (CDC COVID-19 Response) <sup>331</sup> | 2020-07-31 to 2020-08-11 | New Jersey    | Regional         | Moderate             | 871         | 0-17 (n=6700); 18-49 (n=11237); 50-64 (n=10367); ≥65 (n=10408) | NR         | Non-probability | Residual sera | 14.8% (12.2-17.6%)                                   | Ortho-Clinical Diagnostics; Abbott; Roche   Elecsys Anti-SARS-CoV-2 pan-immunoglobulin                                                                                              | 0.0%, 0.0% (Used author-adjusted estimate) | 14.8% (12.5-17.2%)                               |

| Article Author (Study Organization)           | Sampling Dates (YMD)     | Location | Geographic Scope | Overall Risk of Bias | Sample Size | Age                                                            | Female (%) | Sampling method | Sample frame  | Uncorrected Seroprevalence (95% Confidence Interval) | Test Manufacturers   Names   Isotypes                                                                                                                                               | Test Sens, Spec (Source)                   | Corrected Seroprevalence (95% Credible Interval) |
|-----------------------------------------------|--------------------------|----------|------------------|----------------------|-------------|----------------------------------------------------------------|------------|-----------------|---------------|------------------------------------------------------|-------------------------------------------------------------------------------------------------------------------------------------------------------------------------------------|--------------------------------------------|--------------------------------------------------|
|                                               |                          |          |                  |                      |             |                                                                |            |                 |               |                                                      | immunoassay, ARCHITECT SARS-CoV-2 IgG<br>immunoassay, VIT- ROS SARS-CoV-2 IgG<br>immunoassay   IgG                                                                                  |                                            |                                                  |
| Bajema (CDC COVID-19 Response) <sup>331</sup> | 2020-07-31 to 2020-08-11 | New York | Regional         | Moderate             | 846         | 0-17 (n=6700); 18-49 (n=11237); 50-64 (n=10367); ≥65 (n=10408) | NR         | Non-probability | Residual sera | 23.3% (20.1-26.3%)                                   | Ortho-Clinical Diagnostics; Abbott; Roche   Elecsys Anti-SARS-CoV-2 pan-immunoglobulin immunoassay, ARCHITECT SARS-CoV-2 IgG immunoassay, VIT- ROS SARS-CoV-2 IgG immunoassay   IgG | 0.0%, 0.0% (Used author-adjusted estimate) | 23.3% (20.5-26.2%)                               |
| Bajema (CDC COVID-19 Response) <sup>331</sup> | 2020-07-29 to 2020-08-11 | Ohio     | Regional         | Moderate             | 786         | 0-17 (n=6700); 18-49 (n=11237); 50-64 (n=10367); ≥65 (n=10408) | NR         | Non-probability | Residual sera | 2.3% (1.1-3.6%)                                      | Ortho-Clinical Diagnostics; Abbott; Roche   Elecsys Anti-SARS-CoV-2 pan-immunoglobulin immunoassay, ARCHITECT SARS-CoV-2 IgG immunoassay, VIT- ROS SARS-CoV-2 IgG immunoassay   IgG | 0.0%, 0.0% (Used author-adjusted estimate) | 2.3% (1.4-3.5%)                                  |
| Bajema (CDC COVID-19 Response) <sup>331</sup> | 2020-08-05 to 2020-08-11 | Oregon   | Regional         | Moderate             | 658         | 0-17 (n=6700); 18-49 (n=11237); 50-                            | NR         | Non-probability | Residual sera | 2.3% (1.0-3.8%)                                      | Ortho-Clinical Diagnostics; Abbott; Roche   Elecsys Anti-                                                                                                                           | 0.0%, 0.0% (Used author-adjusted estimate) | 2.3% (1.3-3.6%)                                  |

| Article Author (Study Organization)           | Sampling Dates (YMD)     | Location     | Geographic Scope | Overall Risk of Bias | Sample Size | Age                                                                     | Female (%) | Sampling method | Sample frame  | Uncorrected Seroprevalence (95% Confidence Interval) | Test Manufacturers   Names   Isotypes                                                                                                                                               | Test Sens, Spec (Source)                   | Corrected Seroprevalence (95% Credible Interval) |
|-----------------------------------------------|--------------------------|--------------|------------------|----------------------|-------------|-------------------------------------------------------------------------|------------|-----------------|---------------|------------------------------------------------------|-------------------------------------------------------------------------------------------------------------------------------------------------------------------------------------|--------------------------------------------|--------------------------------------------------|
|                                               |                          |              |                  |                      |             | 64 (n=10367);<br>≥65 (n=10408)                                          |            |                 |               |                                                      | SARS-CoV-2 pan-immunoglobulin immunoassay, ARCHITECT SARS-CoV-2 IgG immunoassay, VIT- ROS SARS-CoV-2 IgG immunoassay   IgG                                                          |                                            |                                                  |
| Bajema (CDC COVID-19 Response) <sup>331</sup> | 2020-07-31 to 2020-08-11 | Pennsylvania | Regional         | High                 | 575         | 0-17 (n=6700);<br>18-49 (n=11237);<br>50-64 (n=10367);<br>≥65 (n=10408) | NR         | Non-probability | Residual sera | 10.2% (5.7-17.2%)                                    | Ortho-Clinical Diagnostics; Abbott; Roche   Elecsys Anti-SARS-CoV-2 pan-immunoglobulin immunoassay, ARCHITECT SARS-CoV-2 IgG immunoassay, VIT- ROS SARS-CoV-2 IgG immunoassay   IgG | 0.0%, 0.0% (Used author-adjusted estimate) | 10.2% (7.8-12.7%)                                |
| Bajema (CDC COVID-19 Response) <sup>331</sup> | 2020-07-30 to 2020-08-11 | Rhode Island | Regional         | Moderate             | 684         | 0-17 (n=6700);<br>18-49 (n=11237);<br>50-64 (n=10367);<br>≥65 (n=10408) | NR         | Non-probability | Residual sera | 3.0% (1.2-5.5%)                                      | Ortho-Clinical Diagnostics; Abbott; Roche   Elecsys Anti-SARS-CoV-2 pan-immunoglobulin immunoassay, ARCHITECT SARS-CoV-2 IgG immunoassay, VIT- ROS SARS-CoV-2 IgG immunoassay   IgG | 0.0%, 0.0% (Used author-adjusted estimate) | 3.0% (1.9-4.4%)                                  |

| Article Author (Study Organization)           | Sampling Dates (YMD)     | Location  | Geographic Scope | Overall Risk of Bias | Sample Size | Age                                                            | Female (%) | Sampling method | Sample frame  | Uncorrected Seroprevalence (95% Confidence Interval) | Test Manufacturers   Names   Isotypes                                                                                                                                              | Test Sens, Spec (Source)                   | Corrected Seroprevalence (95% Credible Interval) |
|-----------------------------------------------|--------------------------|-----------|------------------|----------------------|-------------|----------------------------------------------------------------|------------|-----------------|---------------|------------------------------------------------------|------------------------------------------------------------------------------------------------------------------------------------------------------------------------------------|--------------------------------------------|--------------------------------------------------|
| Bajema (CDC COVID-19 Response) <sup>331</sup> | 2020-07-30 to 2020-08-11 | Tennessee | Regional         | Moderate             | 1003        | 0-17 (n=6700); 18-49 (n=11237); 50-64 (n=10367); ≥65 (n=10408) | NR         | Non-probability | Residual sera | 6.3% (4.4-8.2%)                                      | Ortho-Clinical Diagnostics; Abbott; Roche   Elecsys Anti-SARS-CoV-2 pan-immunoglobulin immunoassay, ARCHITECT SARS-CoV-2 IgG immunoassay, VIT-ROS SARS-CoV-2 IgG immunoassay   IgG | 0.0%, 0.0% (Used author-adjusted estimate) | 6.3% (4.9-7.9%)                                  |
| Bajema (CDC COVID-19 Response) <sup>331</sup> | 2020-07-30 to 2020-08-11 | Utah      | Regional         | Moderate             | 880         | 0-17 (n=6700); 18-49 (n=11237); 50-64 (n=10367); ≥65 (n=10408) | NR         | Non-probability | Residual sera | 3.2% (1.7-5.0%)                                      | Ortho-Clinical Diagnostics; Abbott; Roche   Elecsys Anti-SARS-CoV-2 pan-immunoglobulin immunoassay, ARCHITECT SARS-CoV-2 IgG immunoassay, VIT-ROS SARS-CoV-2 IgG immunoassay   IgG | 0.0%, 0.0% (Used author-adjusted estimate) | 3.2% (2.2-4.5%)                                  |
| Bajema (CDC COVID-19 Response) <sup>331</sup> | 2020-07-30 to 2020-08-11 | Vermont   | Regional         | High                 | 346         | 0-17 (n=6700); 18-49 (n=11237); 50-64 (n=10367); ≥65 (n=10408) | NR         | Non-probability | Residual sera | 0.5% (0.0-1.8%)                                      | Ortho-Clinical Diagnostics; Abbott; Roche   Elecsys Anti-SARS-CoV-2 pan-immunoglobulin immunoassay, ARCHITECT SARS-CoV-2 IgG immunoassay, VIT-ROS SARS-CoV-2 IgG                   | 0.0%, 0.0% (Used author-adjusted estimate) | 0.5% (0.0-1.3%)                                  |

| Article Author (Study Organization)           | Sampling Dates (YMD)     | Location   | Geographic Scope | Overall Risk of Bias | Sample Size | Age                                                            | Female (%) | Sampling method | Sample frame  | Uncorrected Seroprevalence (95% Confidence Interval) | Test Manufacturers   Names   Isotypes                                                                                                                                              | Test Sens, Spec (Source)                   | Corrected Seroprevalence (95% Credible Interval) |
|-----------------------------------------------|--------------------------|------------|------------------|----------------------|-------------|----------------------------------------------------------------|------------|-----------------|---------------|------------------------------------------------------|------------------------------------------------------------------------------------------------------------------------------------------------------------------------------------|--------------------------------------------|--------------------------------------------------|
|                                               |                          |            |                  |                      |             |                                                                |            |                 |               |                                                      | immunoassay   IgG                                                                                                                                                                  |                                            |                                                  |
| Bajema (CDC COVID-19 Response) <sup>331</sup> | 2020-07-31 to 2020-08-11 | Virginia   | Regional         | Moderate             | 730         | 0-17 (n=6700); 18-49 (n=11237); 50-64 (n=10367); ≥65 (n=10408) | NR         | Non-probability | Residual sera | 4.1% (1.8-6.9%)                                      | Ortho-Clinical Diagnostics; Abbott; Roche   Elecsys Anti-SARS-CoV-2 pan-immunoglobulin immunoassay, ARCHITECT SARS-CoV-2 IgG immunoassay, VIT-ROS SARS-CoV-2 IgG immunoassay   IgG | 0.0%, 0.0% (Used author-adjusted estimate) | 4.1% (2.7-5.6%)                                  |
| Bajema (CDC COVID-19 Response) <sup>331</sup> | 2020-07-29 to 2020-08-11 | Washington | Regional         | Moderate             | 684         | 0-17 (n=6700); 18-49 (n=11237); 50-64 (n=10367); ≥65 (n=10408) | NR         | Non-probability | Residual sera | 2.1% (0.8-3.7%)                                      | Ortho-Clinical Diagnostics; Abbott; Roche   Elecsys Anti-SARS-CoV-2 pan-immunoglobulin immunoassay, ARCHITECT SARS-CoV-2 IgG immunoassay, VIT-ROS SARS-CoV-2 IgG immunoassay   IgG | 0.0%, 0.0% (Used author-adjusted estimate) | 2.1% (1.2-3.3%)                                  |
| Bajema (CDC COVID-19 Response) <sup>331</sup> | 2020-07-29 to 2020-08-10 | Illinois   | Regional         | Moderate             | 1004        | 0-17 (n=6700); 18-49 (n=11237); 50-64 (n=10367); ≥65 (n=10408) | NR         | Non-probability | Residual sera | 3.9% (2.5-5.2%)                                      | Ortho-Clinical Diagnostics; Abbott; Roche   Elecsys Anti-SARS-CoV-2 pan-immunoglobulin immunoassay, ARCHITECT SARS-CoV-2 IgG                                                       | 0.0%, 0.0% (Used author-adjusted estimate) | 3.9% (2.8-5.2%)                                  |

| Article Author (Study Organization)           | Sampling Dates (YMD)     | Location      | Geographic Scope | Overall Risk of Bias | Sample Size | Age                                                            | Female (%) | Sampling method | Sample frame  | Uncorrected Seroprevalence (95% Confidence Interval) | Test Manufacturers   Names   Isotypes                                                                                                                                               | Test Sens, Spec (Source)                   | Corrected Seroprevalence (95% Credible Interval) |
|-----------------------------------------------|--------------------------|---------------|------------------|----------------------|-------------|----------------------------------------------------------------|------------|-----------------|---------------|------------------------------------------------------|-------------------------------------------------------------------------------------------------------------------------------------------------------------------------------------|--------------------------------------------|--------------------------------------------------|
|                                               |                          |               |                  |                      |             |                                                                |            |                 |               |                                                      | immunoassay, VIT- ROS SARS-CoV-2 IgG<br>immunoassay   IgG                                                                                                                           |                                            |                                                  |
| Bajema (CDC COVID-19 Response) <sup>331</sup> | 2020-07-30 to 2020-08-10 | Massachusetts | Regional         | Moderate             | 978         | 0-17 (n=6700); 18-49 (n=11237); 50-64 (n=10367); ≥65 (n=10408) | NR         | Non-probability | Residual sera | 4.2% (2.9-5.8%)                                      | Ortho-Clinical Diagnostics; Abbott; Roche   Elecsys Anti-SARS-CoV-2 pan-immunoglobulin immunoassay, ARCHITECT SARS-CoV-2 IgG immunoassay, VIT- ROS SARS-CoV-2 IgG immunoassay   IgG | 0.0%, 0.0% (Used author-adjusted estimate) | 4.2% (3.1-5.6%)                                  |
| Bajema (CDC COVID-19 Response) <sup>331</sup> | 2020-07-28 to 2020-08-10 | Missouri      | Regional         | Moderate             | 979         | 0-17 (n=6700); 18-49 (n=11237); 50-64 (n=10367); ≥65 (n=10408) | NR         | Non-probability | Residual sera | 2.5% (1.4-3.6%)                                      | Ortho-Clinical Diagnostics; Abbott; Roche   Elecsys Anti-SARS-CoV-2 pan-immunoglobulin immunoassay, ARCHITECT SARS-CoV-2 IgG immunoassay, VIT- ROS SARS-CoV-2 IgG immunoassay   IgG | 0.0%, 0.0% (Used author-adjusted estimate) | 2.5% (1.6-3.6%)                                  |
| Bajema (CDC COVID-19 Response) <sup>331</sup> | 2020-07-29 to 2020-08-10 | Montana       | Regional         | High                 | 199         | 0-17 (n=6700); 18-49 (n=11237); 50-64 (n=10367); ≥65 (n=10408) | NR         | Non-probability | Residual sera | 0.5% (0.0-1.7%)                                      | Ortho-Clinical Diagnostics; Abbott; Roche   Elecsys Anti-SARS-CoV-2 pan-immunoglobulin                                                                                              | 0.0%, 0.0% (Used author-adjusted estimate) | 0.5% (0.0-1.3%)                                  |



| Article Author (Study Organization)           | Sampling Dates (YMD)     | Location       | Geographic Scope | Overall Risk of Bias | Sample Size | Age                                                            | Female (%) | Sampling method | Sample frame  | Uncorrected Seroprevalence (95% Confidence Interval) | Test Manufacturers   Names   Isotypes                                                                                                                                               | Test Sens, Spec (Source)                   | Corrected Seroprevalence (95% Credible Interval) |
|-----------------------------------------------|--------------------------|----------------|------------------|----------------------|-------------|----------------------------------------------------------------|------------|-----------------|---------------|------------------------------------------------------|-------------------------------------------------------------------------------------------------------------------------------------------------------------------------------------|--------------------------------------------|--------------------------------------------------|
|                                               |                          |                |                  |                      |             |                                                                |            |                 |               |                                                      | immunoassay, ARCHITECT SARS-CoV-2 IgG<br>immunoassay, VIT- ROS SARS-CoV-2 IgG<br>immunoassay   IgG                                                                                  |                                            |                                                  |
| Bajema (CDC COVID-19 Response) <sup>331</sup> | 2020-07-29 to 2020-08-10 | North Carolina | Regional         | Moderate             | 928         | 0-17 (n=6700); 18-49 (n=11237); 50-64 (n=10367); ≥65 (n=10408) | NR         | Non-probability | Residual sera | 2.5% (1.3-3.7%)                                      | Ortho-Clinical Diagnostics; Abbott; Roche   Elecsys Anti-SARS-CoV-2 pan-immunoglobulin immunoassay, ARCHITECT SARS-CoV-2 IgG immunoassay, VIT- ROS SARS-CoV-2 IgG immunoassay   IgG | 0.0%, 0.0% (Used author-adjusted estimate) | 2.5% (1.6-3.6%)                                  |
| Bajema (CDC COVID-19 Response) <sup>331</sup> | 2020-07-29 to 2020-08-08 | Kansas         | Regional         | Moderate             | 962         | 0-17 (n=6700); 18-49 (n=11237); 50-64 (n=10367); ≥65 (n=10408) | NR         | Non-probability | Residual sera | 1.6% (0.7-2.8%)                                      | Ortho-Clinical Diagnostics; Abbott; Roche   Elecsys Anti-SARS-CoV-2 pan-immunoglobulin immunoassay, ARCHITECT SARS-CoV-2 IgG immunoassay, VIT- ROS SARS-CoV-2 IgG immunoassay   IgG | 0.0%, 0.0% (Used author-adjusted estimate) | 1.6% (0.9-2.5%)                                  |
| Bajema (CDC COVID-19 Response) <sup>331</sup> | 2020-07-30 to 2020-08-07 | Colorado       | Regional         | Moderate             | 1001        | 0-17 (n=6700); 18-49 (n=11237); 50-                            | NR         | Non-probability | Residual sera | 2.4% (0.9-4.5%)                                      | Ortho-Clinical Diagnostics; Abbott; Roche   Elecsys Anti-                                                                                                                           | 0.0%, 0.0% (Used author-adjusted estimate) | 2.4% (1.6-3.5%)                                  |

| Article Author (Study Organization)           | Sampling Dates (YMD)     | Location    | Geographic Scope | Overall Risk of Bias | Sample Size | Age                                                            | Female (%) | Sampling method | Sample frame  | Uncorrected Seroprevalence (95% Confidence Interval) | Test Manufacturers   Names   Isotypes                                                                                                                                               | Test Sens, Spec (Source)                   | Corrected Seroprevalence (95% Credible Interval) |
|-----------------------------------------------|--------------------------|-------------|------------------|----------------------|-------------|----------------------------------------------------------------|------------|-----------------|---------------|------------------------------------------------------|-------------------------------------------------------------------------------------------------------------------------------------------------------------------------------------|--------------------------------------------|--------------------------------------------------|
|                                               |                          |             |                  |                      |             | 64 (n=10367); ≥65 (n=10408)                                    |            |                 |               |                                                      | SARS-CoV-2 pan-immunoglobulin immunoassay, ARCHITECT SARS-CoV-2 IgG immunoassay, VIT- ROS SARS-CoV-2 IgG immunoassay   IgG                                                          |                                            |                                                  |
| Bajema (CDC COVID-19 Response) <sup>331</sup> | 2020-07-27 to 2020-08-07 | Puerto Rico | Regional         | Moderate             | 984         | 0-17 (n=6700); 18-49 (n=11237); 50-64 (n=10367); ≥65 (n=10408) | NR         | Non-probability | Residual sera | 1.1% (0.4-1.8%)                                      | Ortho-Clinical Diagnostics; Abbott; Roche   Elecsys Anti-SARS-CoV-2 pan-immunoglobulin immunoassay, ARCHITECT SARS-CoV-2 IgG immunoassay, VIT- ROS SARS-CoV-2 IgG immunoassay   IgG | 0.0%, 0.0% (Used author-adjusted estimate) | 1.1% (0.5-1.8%)                                  |
| Bajema (CDC COVID-19 Response) <sup>331</sup> | 2020-07-30 to 2020-08-05 | California  | Regional         | Moderate             | 980         | 0-17 (n=6700); 18-49 (n=11237); 50-64 (n=10367); ≥65 (n=10408) | NR         | Non-probability | Residual sera | 5.7% (4.0-7.8%)                                      | Ortho-Clinical Diagnostics; Abbott; Roche   Elecsys Anti-SARS-CoV-2 pan-immunoglobulin immunoassay, ARCHITECT SARS-CoV-2 IgG immunoassay, VIT- ROS SARS-CoV-2 IgG immunoassay   IgG | 0.0%, 0.0% (Used author-adjusted estimate) | 5.7% (4.3-7.2%)                                  |

| Article Author (Study Organization)           | Sampling Dates (YMD)     | Location    | Geographic Scope | Overall Risk of Bias | Sample Size | Age                                                            | Female (%) | Sampling method | Sample frame  | Uncorrected Seroprevalence (95% Confidence Interval) | Test Manufacturers   Names   Isotypes                                                                                                                                              | Test Sens, Spec (Source)                   | Corrected Seroprevalence (95% Credible Interval) |
|-----------------------------------------------|--------------------------|-------------|------------------|----------------------|-------------|----------------------------------------------------------------|------------|-----------------|---------------|------------------------------------------------------|------------------------------------------------------------------------------------------------------------------------------------------------------------------------------------|--------------------------------------------|--------------------------------------------------|
| Bajema (CDC COVID-19 Response) <sup>331</sup> | 2020-07-29 to 2020-08-05 | Texas       | Regional         | Moderate             | 986         | 0-17 (n=6700); 18-49 (n=11237); 50-64 (n=10367); ≥65 (n=10408) | NR         | Non-probability | Residual sera | 5.9% (4.0-8.0%)                                      | Ortho-Clinical Diagnostics; Abbott; Roche   Elecsys Anti-SARS-CoV-2 pan-immunoglobulin immunoassay, ARCHITECT SARS-CoV-2 IgG immunoassay, VIT-ROS SARS-CoV-2 IgG immunoassay   IgG | 0.0%, 0.0% (Used author-adjusted estimate) | 5.9% (4.5-7.5%)                                  |
| Bajema (CDC COVID-19 Response) <sup>331</sup> | 2020-07-28 to 2020-08-04 | Oklahoma    | Regional         | Moderate             | 979         | 0-17 (n=6700); 18-49 (n=11237); 50-64 (n=10367); ≥65 (n=10408) | NR         | Non-probability | Residual sera | 1.6% (0.9-2.5%)                                      | Ortho-Clinical Diagnostics; Abbott; Roche   Elecsys Anti-SARS-CoV-2 pan-immunoglobulin immunoassay, ARCHITECT SARS-CoV-2 IgG immunoassay, VIT-ROS SARS-CoV-2 IgG immunoassay   IgG | 0.0%, 0.0% (Used author-adjusted estimate) | 1.6% (0.9-2.5%)                                  |
| Bajema (CDC COVID-19 Response) <sup>331</sup> | 2020-07-30 to 2020-08-03 | Connecticut | Regional         | Moderate             | 994         | 0-17 (n=6700); 18-49 (n=11237); 50-64 (n=10367); ≥65 (n=10408) | NR         | Non-probability | Residual sera | 3.4% (2.0-4.7%)                                      | Ortho-Clinical Diagnostics; Abbott; Roche   Elecsys Anti-SARS-CoV-2 pan-immunoglobulin immunoassay, ARCHITECT SARS-CoV-2 IgG immunoassay, VIT-ROS SARS-CoV-2 IgG                   | 0.0%, 0.0% (Used author-adjusted estimate) | 3.4% (2.3-4.6%)                                  |

| Article Author (Study Organization)                | Sampling Dates (YMD)     | Location                                     | Geographic Scope | Overall Risk of Bias | Sample Size | Age                                                            | Female (%) | Sampling method | Sample frame                    | Uncorrected Seroprevalence (95% Confidence Interval) | Test Manufacturers   Names   Isotypes                                                                                                                                              | Test Sens, Spec (Source)                          | Corrected Seroprevalence (95% Credible Interval) |
|----------------------------------------------------|--------------------------|----------------------------------------------|------------------|----------------------|-------------|----------------------------------------------------------------|------------|-----------------|---------------------------------|------------------------------------------------------|------------------------------------------------------------------------------------------------------------------------------------------------------------------------------------|---------------------------------------------------|--------------------------------------------------|
|                                                    |                          |                                              |                  |                      |             |                                                                |            |                 |                                 |                                                      | immunoassay   IgG                                                                                                                                                                  |                                                   |                                                  |
| Bajema (CDC COVID-19 Response) <sup>331</sup>      | 2020-07-31 to 2020-08-03 | Florida                                      | Regional         | Moderate             | 980         | 0-17 (n=6700); 18-49 (n=11237); 50-64 (n=10367); ≥65 (n=10408) | NR         | Non-probability | Residual sera                   | 4.3% (2.8-5.9%)                                      | Ortho-Clinical Diagnostics; Abbott; Roche   Elecsys Anti-SARS-CoV-2 pan-immunoglobulin immunoassay, ARCHITECT SARS-CoV-2 IgG immunoassay, VIT-ROS SARS-CoV-2 IgG immunoassay   IgG | 0.0%, 0.0% (Used author-adjusted estimate)        | 4.3% (3.1-5.7%)                                  |
| Bajema (CDC COVID-19 Response) <sup>331</sup>      | 2020-07-30 to 2020-08-02 | Nevada                                       | Regional         | Moderate             | 979         | 0-17 (n=6700); 18-49 (n=11237); 50-64 (n=10367); ≥65 (n=10408) | NR         | Non-probability | Residual sera                   | 5.1% (3.6-6.7%)                                      | Ortho-Clinical Diagnostics; Abbott; Roche   Elecsys Anti-SARS-CoV-2 pan-immunoglobulin immunoassay, ARCHITECT SARS-CoV-2 IgG immunoassay, VIT-ROS SARS-CoV-2 IgG immunoassay   IgG | 0.0%, 0.0% (Used author-adjusted estimate)        | 5.1% (3.8-6.5%)                                  |
| Feehan (Louisiana State University) <sup>341</sup> | 2020-07-15 to 2020-07-31 | Louisiana   Baton Rouge                      | Local            | Moderate             | 2138        | Mean 48.7 (Range 18-91)                                        | 63.6       | Probability     | Household and community samples | 3.6% (2.8-4.4%)                                      | Abbott   Abbott ARCHITECT i2000SR   IgG                                                                                                                                            | 0.4%, 1.0% (FINDDx / MUHC independent evaluation) | -                                                |
| Vassallo (Vitalant) <sup>342</sup>                 | 2020-06-01 to 2020-07-31 | Colorado, Mississippi, North Dakota, Nevada, | National         | Moderate             | 252882      | 16-17 (n=1812); 18-29 (n=22048); 30-39 (n=30956); 40-          | 39.4       | Non-probability | Blood donors                    | 1.8%                                                 | Ortho-Clinical Diagnostics   VITROS Anti-SARS-CoV-2 Total Reagent                                                                                                                  | 0.9%, 1.0% (FINDDx / MUHC independent evaluation) | -                                                |

| Article Author (Study Organization)             | Sampling Dates (YMD)     | Location                                                                                                                                                                                                                                                                                                    | Geographic Scope | Overall Risk of Bias | Sample Size | Age                                                                                                                                            | Female (%) | Sampling method | Sample frame  | Uncorrected Seroprevalence (95% Confidence Interval) | Test Manufacturers   Names   Isotypes            | Test Sens, Spec (Source)                          | Corrected Seroprevalence (95% Credible Interval) |
|-------------------------------------------------|--------------------------|-------------------------------------------------------------------------------------------------------------------------------------------------------------------------------------------------------------------------------------------------------------------------------------------------------------|------------------|----------------------|-------------|------------------------------------------------------------------------------------------------------------------------------------------------|------------|-----------------|---------------|------------------------------------------------------|--------------------------------------------------|---------------------------------------------------|--------------------------------------------------|
|                                                 |                          | Louisiana, Tennessee, Washington, Wyoming, California, Montana, South Dakota, New Mexico, Texas, Arizona   Reno, Las Vegas, Cheyenne, Phoenix, Lubbock, Billings, Albuquerque, Rapid City, Tupelo, San Francisco, Spokane, McAllen, El Paso, Fargo, Newark, ventura, Memphis, Lafayette, Sacramento, Denver |                  |                      |             | 49 (n=34151); 50-64 (n=66030); 65-74 (n=28453); 75-84 (n=5848); >85 (n=357)                                                                    |            |                 |               |                                                      | Pack   IgG, IgA, IgM                             |                                                   |                                                  |
| Spencer (American Red Cross) <sup>345</sup>     | 2020-06-15 to 2020-07-27 |                                                                                                                                                                                                                                                                                                             | National         | High                 | 573586      | =>18                                                                                                                                           | NR         | Non-probability | Blood donors  | 1.5%                                                 | Ortho   Ortho Anti-SARS-CoV2 Total Ig Test   IgG | 0.8%, 1.0% (FINDDx / MUHC independent evaluation) | -                                                |
| Yamaki (St. Jude Medical Center) <sup>346</sup> | 2020-07-15 to 2020-07-27 | California   Fullerton                                                                                                                                                                                                                                                                                      | Local            | High                 | 865         | 10-19 (N=9), 20-29 (n=55), 30-39 (n=81), 40-49 (n=83), 50-59 (n=133), 60-69 (n=159), 70-79 (n=164), 80-89 (n=144), 90-99 (n=35), 100-109 (n=2) | 55.3       | Non-probability | Residual sera | 9.4% (8.0-12.0%)                                     | Abbott Laboratories   Abbott Architect   IgG     | 0.4%, 1.0% (FINDDx / MUHC independent evaluation) | -                                                |

| Article Author (Study Organization)                          | Sampling Dates (YMD)     | Location                       | Geographic Scope | Overall Risk of Bias | Sample Size | Age                      | Female (%) | Sampling method | Sample frame                    | Uncorrected Seroprevalence (95% Confidence Interval) | Test Manufacturers   Names   Isotypes                                                                                       | Test Sens, Spec (Source)                                                             | Corrected Seroprevalence (95% Credible Interval) |
|--------------------------------------------------------------|--------------------------|--------------------------------|------------------|----------------------|-------------|--------------------------|------------|-----------------|---------------------------------|------------------------------------------------------|-----------------------------------------------------------------------------------------------------------------------------|--------------------------------------------------------------------------------------|--------------------------------------------------|
| Mahajan (Yale School of Medicine) <sup>349</sup>             | 2020-06-23 to 2020-07-22 | Connecticut                    | Regional         | High                 | 148         | Mean 46.4 (SD 13.0)      | 64.2       | Probability     | Household and community samples | 6.4% (0.9-11.9%)                                     | Ortho-Clinical Diagnostics   Ortho-Diagnostics VITROS anti-SARS-CoV-2 IgG assay   IgG                                       | 0.8%, 1.0% (FINDDx / MUHC independent evaluation)                                    | -                                                |
| Mahajan (Yale School of Medicine) <sup>349</sup>             | 2020-06-23 to 2020-07-22 | Connecticut                    | Regional         | High                 | 171         | Mean 39.9 (SD 15.5)      | 60.2       | Probability     | Household and community samples | 19.9% (13.2-26.6%)                                   | Ortho-Clinical Diagnostics   Ortho-Diagnostics VITROS anti-SARS-CoV-2 IgG assay   IgG                                       | 0.8%, 1.0% (FINDDx / MUHC independent evaluation)                                    | -                                                |
| McMillan (Riverside University Health System) <sup>350</sup> | 2020-07-06 to 2020-07-20 | California                     | Local            | Unclear              | 1726        | NR                       | NR         | Probability     | Household and community samples | 5.9%                                                 | NR   NR   NR                                                                                                                | No data                                                                              | -                                                |
| Zauzmer (Washington DC Public Health) <sup>352</sup>         | 2020-06-15 to 2020-07-15 | Washington D.C   Washington DC | Local            | High                 | 13706       | NR                       | NR         | Non-probability | Household and community samples | 5.9%                                                 | DiaSorin LIAISON; Abbot Alinity i   NR   NR                                                                                 | 97.8%, 97.8% (Used Bastos SR/MA data; no sens, spec, or author adjustment available) | 3.8% (3.2-4.6%)                                  |
| Jin (New York Blood Centre) <sup>353</sup>                   | 2020-06-15 to 2020-07-15 | New York   New York City       | Local            | High                 | 1000        | Median 48 (95% CI 46-49) | 38.5       | Non-probability | Blood donors                    | 12.8%                                                | Ortho Clinical Diagnostics; Abbott Labs   VITROS™ SARS-CoV-2 Total Ig assay, Abbott Labs Architect SARS-CoV-2 IgG   IgG     | 97.8%, 97.8% (Used Bastos SR/MA data; no sens, spec, or author adjustment available) | 11.2% (8.9-13.5%)                                |
| Kaufman (Quest Diagnostics) <sup>355</sup>                   | 2020-04-21 to 2020-07-10 |                                | National         | High                 | 2402282     | NR                       | NR         | Non-probability | Household and community samples | 11.8%                                                | Ortho-Clinical Diagnostics; EUROIMMUN; Abbott Laboratories   Architect, VITROS, EUROIMMUN Anti-SARS-CoV-2 ELISA (IgG)   IgG | No data                                                                              | -                                                |

| Article Author (Study Organization)                                 | Sampling Dates (YMD)     | Location                 | Geographic Scope | Overall Risk of Bias | Sample Size | Age                                                                                                                     | Female (%) | Sampling method | Sample frame                    | Uncorrected Seroprevalence (95% Confidence Interval) | Test Manufacturers   Names   Isotypes                                                                       | Test Sens, Spec (Source)                                                             | Corrected Seroprevalence (95% Credible Interval) |
|---------------------------------------------------------------------|--------------------------|--------------------------|------------------|----------------------|-------------|-------------------------------------------------------------------------------------------------------------------------|------------|-----------------|---------------------------------|------------------------------------------------------|-------------------------------------------------------------------------------------------------------------|--------------------------------------------------------------------------------------|--------------------------------------------------|
| Kamath (Serimmune) <sup>359</sup>                                   | 2020-03-01 to 2020-07-07 | New York   New York City | Local            | High                 | 1559        | 17-25 (n=395, 25%); 26-35 (n=200, 13%); 36-45 (n=164, 11%); 46-55 (n=206, 13%); 56-65 (n=370, 24%); 66-80 (n=224, 14%). | 48.4       | Non-probability | Blood donors                    | 4.4%                                                 | Serimmune   Serum Epitope Repertoire Analysis (SERA)   IgG                                                  | 91.0%, 99.3% (Test developer / manufacturer evaluation)                              | 4.0% (2.7-5.2%)                                  |
| Childs (Oxnard Fire Department) <sup>360</sup>                      | 2020-06-22 to 2020-07-06 | California               | Local            | High                 | 6794        | 13+                                                                                                                     | 60.7       | Non-probability | Household and community samples | 1.3%                                                 | 1) Abbott 2) Bio-Rad   NR   NR                                                                              | No data                                                                              | -                                                |
| Stadlbauer (Icahn School of Medicine at Mount Sinai) <sup>361</sup> | 2020-02-02 to 2020-07-05 | New York   New York City | Local            | High                 | 6590        | 0-20 (n=358); 21-40 (n=2808); 41-60 (n=1381); >=61 (n=2043)                                                             | 67.6       | Non-probability | Residual sera                   | 11.1%                                                | Mount Sinai Hospital New York   N/A - Author-designed   IgG                                                 | 95.0%, 100.0% (Test developer / manufacturer evaluation)                             | 11.0% (7.9-13.2%)                                |
| Stadlbauer (Icahn School of Medicine at Mount Sinai) <sup>361</sup> | 2020-02-02 to 2020-07-05 | New York   New York City | Local            | High                 | 4101        | 0-20 (n=115); 21-40 (n=616); 41-60 (n=1185); >=61 (n=2185)                                                              | 45.5       | Non-probability | Residual sera                   | 26.0%                                                | Mount Sinai Hospital New York   N/A - Author-designed   IgG                                                 | 95.0%, 100.0% (Test developer / manufacturer evaluation)                             | 27.0% (23.1-30.7%)                               |
| Walker (DaVita Clinical Research) <sup>363</sup>                    | 2020-05-27 to 2020-07-01 |                          | National         | Moderate             | 4297        | <50 (n=2398), 50-59 (n=2669), 60-69 (n=3568), 70-79 (n=2873), 80+ (n=1424)                                              | 125.5      | Probability     | Residual sera                   | 4.8% (4.1-5.4%)                                      | Diazyme Laboratories; Inc   Indirect chemiluminescence immunoassays for anti-SARS-CoV2 IgG antibodies   IgG | 97.8%, 97.8% (Used Bastos SR/MA data; no sens, spec, or author adjustment available) | 2.7% (2.2-3.2%)                                  |
| Viglienzoni (University of Vermont) <sup>367</sup>                  | Until 2020-06-30         | Vermont                  | Local            | High                 | 455         | NR                                                                                                                      | NR         | Non-probability | Household and community samples | 2.2%                                                 | University of Vermont   NR   NR                                                                             | No data                                                                              | -                                                |
| Samore (University of Utah) <sup>368</sup>                          | 2020-05-04 to 2020-06-30 | Utah                     | Regional         | Moderate             | 8108        | Median 44 (IQR 30-62)                                                                                                   | 53.5       | Probability     | Household and community samples | 0.8% (0.1-1.6%)                                      | Abbott   Abbott SARS-CoV-2 IgG   IgG                                                                        | 86.4%, 99.6% (Used author-adjusted estimate)                                         | 0.8% (0.6-1.0%)                                  |
| Mahajan (Yale School of Medicine) <sup>349</sup>                    | 2020-06-04 to 2020-06-23 | Connecticut              | Regional         | Moderate             | 567         | Mean 50.1 (SD 17.2)                                                                                                     | 57.0       | Probability     | Household and community samples | 4.0% (2.0-6.0%)                                      | Ortho-Clinical Diagnostics   Ortho-Diagnostics                                                              | 0.8%, 1.0% (FINDDx / MUHC)                                                           | -                                                |

| Article Author (Study Organization)                              | Sampling Dates (YMD)     | Location            | Geographic Scope | Overall Risk of Bias | Sample Size | Age                                                                                                 | Female (%) | Sampling method | Sample frame                    | Uncorrected Seroprevalence (95% Confidence Interval) | Test Manufacturers   Names   Isotypes                                                          | Test Sens, Spec (Source)                          | Corrected Seroprevalence (95% Credible Interval) |
|------------------------------------------------------------------|--------------------------|---------------------|------------------|----------------------|-------------|-----------------------------------------------------------------------------------------------------|------------|-----------------|---------------------------------|------------------------------------------------------|------------------------------------------------------------------------------------------------|---------------------------------------------------|--------------------------------------------------|
|                                                                  |                          |                     |                  |                      |             |                                                                                                     |            |                 |                                 |                                                      | VITROS anti-SARS-CoV-2 IgG assay   IgG                                                         | independent evaluation)                           |                                                  |
| Barzin (University of North Carolina Chapel Hill) <sup>374</sup> | 2020-04-28 to 2020-06-19 | North Carolina      | Regional         | Moderate             | 2973        | 20-29 (n=342), 30-39 (n=599), 40-49 (n=518), 50-59 (n=602), 60-69 (n=489), 70-79 (n=310) 80+ (n=77) | 65.8       | Non-probability | Residual sera                   | 0.0% (0.0-0.9%)                                      | Abbott Laboratories   Abbott SARS-CoV-2 IgG assay   IgG                                        | 100.0%, 98.9% (Used author-adjusted estimate)     | 0.0% (0.0-0.1%)                                  |
| Spectrum News Staff ( University of Louisville) <sup>375</sup>   | 2020-06-10 to 2020-06-19 | Kentucky            | Local            | High                 | 2237        | 18-34 (n=470); 35-59 (n=895); >=60 (n= 895)                                                         | NR         | Non-probability | Household and community samples | 4.0%                                                 | NR   NR   NR                                                                                   | No data                                           | -                                                |
| Dodd (American Red Cross Scientific Affairs) <sup>377</sup>      | 2020-06-15 to 2020-06-15 |                     | National         | Moderate             | 953926      | 16-17 (n=8375); 18-24 (n=51763); 25-39 (n=204407); 40-54 (n=262912); 55+ (n=426469)                 | 55.0       | Non-probability | Blood donors                    | 1.8%                                                 | Ortho-Clinical Diagnostics   Ortho VITROS anti-SARS-CoV-2 S1 Total Ig assay   NR               | 0.9%, 1.0% (FINDDx / MUHC independent evaluation) | -                                                |
| Reifer (Sherman Abrams Laboratory ) <sup>378</sup>               | 2020-05-15 to 2020-06-15 | New York   New York | Local            | High                 | 28523       | >=0                                                                                                 | NR         | Non-probability | Residual sera                   | 44.0%                                                | DiaSorin LIAISON   Liaison® SARS- CoV-2 S1/S2 IgG   IgG                                        | 0.8%, 1.0% (FINDDx / MUHC independent evaluation) | -                                                |
| Sutton (Oregon Health Authority) <sup>379</sup>                  | 2020-05-11 to 2020-06-15 | Oregon              | Regional         | High                 | 897         | 0-4 (n=5); 5-17 (n=24); 18-49 (n=274); 50-64 (n=211); 65-74 (n=178); 75-84 (n=144); >=85 (n=61)     | NR         | Probability     | Residual sera                   | 1.0% (0.2-1.8%)                                      | Abbott   Abbott Architect SARS-CoV-2 IgG assay   IgG                                           | 0.4%, 1.0% (FINDDx / MUHC independent evaluation) | -                                                |
| Anand (Stanford University) <sup>381</sup>                       | 2020-06-15 to 2020-06-15 |                     | National         | Moderate             | 28503       | 18-44 (n=3303); 45-64 (n=11541); 65-79 (n=10220); 80+ (n=3439)                                      | 42.6       | Probability     | Residual sera                   | 9.3% (8.8-9.9%)                                      | Siemens Healthineers   SARS-CoV-2 spike protein receptor binding domain (S1RBD) total antibody | 0.9%, 1.0% (FINDDx / MUHC independent evaluation) | -                                                |



| Article Author (Study Organization)                                            | Sampling Dates (YMD)     | Location                     | Geographic Scope | Overall Risk of Bias | Sample Size | Age     | Female (%) | Sampling method | Sample frame                    | Uncorrected Seroprevalence (95% Confidence Interval) | Test Manufacturers   Names   Isotypes                   | Test Sens, Spec (Source)                                                             | Corrected Seroprevalence (95% Credible Interval) |
|--------------------------------------------------------------------------------|--------------------------|------------------------------|------------------|----------------------|-------------|---------|------------|-----------------|---------------------------------|------------------------------------------------------|---------------------------------------------------------|--------------------------------------------------------------------------------------|--------------------------------------------------|
|                                                                                |                          |                              |                  |                      |             |         |            |                 |                                 |                                                      | chemiluminescence assay   NR                            |                                                                                      |                                                  |
| Hynes (Washoe County Health District) <sup>384</sup>                           | 2020-06-09 to 2020-06-10 | Nevada                       | Local            | High                 | 234         | NR      | NR         | Probability     | Household and community samples | 2.3%                                                 | Abbott   NR   NR                                        | No data                                                                              | -                                                |
| Harden (Routt County Board of Health) <sup>385</sup>                           | Until 2020-06-10         | Colorado   Steamboat Springs | Local            | High                 | 649         | NR      | NR         | Non-probability | Household and community samples | 2.6%                                                 | NR   NR   NR                                            | No data                                                                              | -                                                |
| Rudavsky (Indiana University Fairbanks School of Public Health) <sup>388</sup> | 2020-06-03 to 2020-06-08 | Indiana                      | Regional         | Moderate             | 3600        | NR      | NR         | Probability     | Household and community samples | 1.5%                                                 | NR   NR   NR                                            | No data                                                                              | -                                                |
| Barzin (University of North Carolina Chapel Hill) <sup>374</sup>               | 2020-03-03 to 2020-06-04 | North Carolina               | Regional         | Moderate             | 1449        | =>18    | NR         | Non-probability | Residual sera                   | 0.7%                                                 | Abbott Laboratories   Abbott SARS-CoV-2 IgG assay   IgG | 0.4%, 1.0% (FINDDx / MUHC independent evaluation)                                    | -                                                |
| Ohnesorge (Psalms/Solid Rock Medicine Group) <sup>393</sup>                    | 2020-05-29 to 2020-05-29 | North Carolina               | Local            | Unclear              | 329         | NR      | NR         | Non-probability | Household and community samples | 1.5%                                                 | NR   NR   NR                                            | No data                                                                              | -                                                |
| Hayden (Desert Healthcare District) <sup>395</sup>                             | Until 2020-05-28         | California                   | Local            | Unclear              | 896         | NR      | 50.0       | Non-probability | Household and community samples | 6.0%                                                 | Phamatech   NR   IgG, IgM                               | 0.9%, 0.9% (FINDDx / MUHC independent evaluation)                                    | -                                                |
| Liu (Yale School of Medicine) <sup>396</sup>                                   | 2020-02-19 to 2020-05-26 | Connecticut   New Haven      | Sublocal         | High                 | 3048        | NR      | NR         | Non-probability | Residual sera                   | 5.9%                                                 | In-house   In-house ELISA test   IgG                    | 75.6%, 97.6% (Used Bastos SR/MA data; no sens, spec, or author adjustment available) | 4.6% (2.9-6.3%)                                  |
| Osher (BioSolutions)                                                           | 2020-04-22 to 2020-05-26 | Illinois   Chicago           | Sublocal         | High                 | 113         | 3 to 84 | NR         | Non-probability | Residual sera                   | 15.9%                                                | CLUNGENE   CLUNGENE SARS-COV-2                          | 66.0%, 96.6% (Used Bastos SR/MA data;                                                | 19.3% (8.9-29.6%)                                |

| Article Author (Study Organization)                                                | Sampling Dates (YMD)     | Location            | Geographic Scope | Overall Risk of Bias | Sample Size | Age                                                                                    | Female (%) | Sampling method | Sample frame                    | Uncorrected Seroprevalence (95% Confidence Interval) | Test Manufacturers   Names   Isotypes                                                   | Test Sens, Spec (Source)                          | Corrected Seroprevalence (95% Credible Interval) |
|------------------------------------------------------------------------------------|--------------------------|---------------------|------------------|----------------------|-------------|----------------------------------------------------------------------------------------|------------|-----------------|---------------------------------|------------------------------------------------------|-----------------------------------------------------------------------------------------|---------------------------------------------------|--------------------------------------------------|
| Services LLC) <sup>397</sup>                                                       |                          |                     |                  |                      |             |                                                                                        |            |                 |                                 |                                                      | VIRUS (COVID-19) IgG/IgM Rapid Test Cassette lateral flow immunoassay (LFI).   IgG, IgM | no sens, spec, or author adjustment available)    |                                                  |
| Mukherjee (Humboldt County Department of Health and Human Services) <sup>398</sup> | Until 2020-05-26         | California          | Local            | High                 | 1000        | NR                                                                                     | NR         | Non-probability | Household and community samples | 1.0%                                                 | NR   NR   NR                                                                            | No data                                           | -                                                |
| Alfini (UW Health) <sup>407</sup>                                                  | 2020-05-13 to 2020-05-20 | Wisconsin   Madison | Local            | Unclear              | 433         | NR                                                                                     | NR         | Non-probability | Household and community samples | 0.3%                                                 | NR   NR   NR                                                                            | No data                                           | -                                                |
| Alfini (UW Health) <sup>407</sup>                                                  | 2020-05-13 to 2020-05-20 | Wisconsin   Madison | Local            | Unclear              | 5303        | NR                                                                                     | NR         | Non-probability | Household and community samples | 1.5%                                                 | NR   NR   NR                                                                            | No data                                           | -                                                |
| Montgomery (Iowa Department of Public Health) <sup>408</sup>                       | 2021-04-01 to 2020-05-20 | Iowa                | Regional         | High                 | 18160       | NR                                                                                     | NR         | Non-probability | Household and community samples | 10.0%                                                | NR   NR   IgG                                                                           | No data                                           | -                                                |
| McLaughlin (University of Washington) <sup>412</sup>                               | 2020-05-04 to 2020-05-19 | Idaho               | Local            | Moderate             | 917         | 18-29 (n=96); 30-39 (n=151); 40-49 (n=186); 50-59 (n=225); 60-69 (n=172); >=70 (n=87); | 52.2       | Non-probability | Household and community samples | 23.1% (19.8-26.5%)                                   | Abbott   Abbott Architect SARS-CoV-2 IgG assay   IgG                                    | 92.9%, 99.6% (Used author-adjusted estimate)      | 23.1% (20.4-25.8%)                               |
| Feehan (Oschner Clinic Foundation) <sup>414</sup>                                  | 2020-05-09 to 2020-05-15 | Louisiana           | Local            | Moderate             | 2640        | Mean 50.6 (NR)                                                                         | 63.5       | Probability     | Household and community samples | 6.9% (6.8-6.9%)                                      | Abbott   Abbott Architect SARS-CoV-2 IgG assay   IgG                                    | 0.4%, 1.0% (FINDDx / MUHC independent evaluation) | -                                                |
| Meyer (Winona Health) <sup>415</sup>                                               | 2020-05-10 to 2020-05-15 | Minnesota   Winona  | Local            | High                 | 1000        | NR                                                                                     | NR         | Non-probability | Household and community samples | 7.0%                                                 | NR   NR   IgG                                                                           | No data                                           | -                                                |

| Article Author (Study Organization)                                | Sampling Dates (YMD)     | Location               | Geographic Scope | Overall Risk of Bias | Sample Size | Age                                       | Female (%) | Sampling method | Sample frame                    | Uncorrected Seroprevalence (95% Confidence Interval) | Test Manufacturers   Names   Isotypes                                                 | Test Sens, Spec (Source)                                                             | Corrected Seroprevalence (95% Credible Interval) |
|--------------------------------------------------------------------|--------------------------|------------------------|------------------|----------------------|-------------|-------------------------------------------|------------|-----------------|---------------------------------|------------------------------------------------------|---------------------------------------------------------------------------------------|--------------------------------------------------------------------------------------|--------------------------------------------------|
| Dietrich (Tulane University) <sup>416</sup>                        | 2020-03-18 to 2020-05-15 | Louisiana   Orleans    | Local            | High                 | 812         | Median 11.0 (IQR 4-15)                    | 50.4       | Non-probability | Residual sera                   | 7.6%                                                 | Author-designed   N/A - Author-designed   IgG                                         | 75.6%, 97.6% (Used Bastos SR/MA data; no sens, spec, or author adjustment available) | 6.9% (4.1-9.6%)                                  |
| City of Boston (Boston Public Health Commission) <sup>417</sup>    | Until 2020-05-15         | Massachusetts   Boston | Local            | Moderate             | 750         | Median 42.4 (NR)                          | 61.6       | Probability     | Household and community samples | 9.9%                                                 | NR   NR   NR                                                                          | No data                                                                              | -                                                |
| CBS Los Angeles (University of Southern California) <sup>420</sup> | 2020-05-08 to 2020-05-12 | California             | Local            | Unclear              | 1014        | NR                                        | NR         | Non-probability | Household and community samples | 2.1%                                                 | NR   NR   NR                                                                          | No data                                                                              | -                                                |
| Nesbitt (New York Blood Center) <sup>421</sup>                     | 2020-04-27 to 2020-05-11 | Rhode Island           | Regional         | Moderate             | 1996        | Median 56 (NR)                            | 47.3       | Non-probability | Blood donors                    | 0.7%                                                 | Ortho-Clinical Diagnostics   Ortho-Diagnostics VITROS anti-SARS-CoV-2 IgG assay   IgG | 0.8%, 1.0% (FINDDx / MUHC independent evaluation)                                    | -                                                |
| Ripperger (University of Arizona) <sup>424</sup>                   | 2020-04-30 to 2020-05-07 | Arizona                | Local            | High                 | 5882        | Median NR40 (Range 18-85)                 | 52.4       | Non-probability | Household and community samples | 1.2%                                                 | NR   NR   IgG, IgM                                                                    | 97.6%, 100.0% (Test developer / manufacturer evaluation)                             | 1.0% (0.2-1.5%)                                  |
| Bajema (Centers for Disease Control and Prevention) <sup>428</sup> | 2020-04-28 to 2020-05-03 | Georgia   Atlanta      | Local            | Low                  | 669         | Median 46 (IQR 36-73)                     | 54.9       | Probability     | Household and community samples | 3.6%                                                 | Centers for Disease Control and Prevention (CDC)   CDC SARS-CoV-2 ELISA   NR          | 96.0%, 99.3% (Test developer / manufacturer evaluation)                              | 2.1% (0.0-4.2%)                                  |
| Biggs (CDC COVID-19 Response Team) <sup>429</sup>                  | 2020-04-28 to 2020-05-03 | Georgia                | Local            | Moderate             | 696         | NR                                        | 54.2       | Probability     | Household and community samples | 2.7%                                                 | Ortho-Clinical Diagnostics   VITROS anti-SARS-CoV-2 total antibody   IgG, IgA, IgM    | 0.9%, 1.0% (FINDDx / MUHC independent evaluation)                                    | -                                                |
| Menachemi (Indiana University)                                     | 2020-05-02 to 2020-05-03 | Indiana   Indianapolis | Local            | High                 | 898         | <20 (n=77); 20-39 (n=277); 40-59 (n=369); | 58.2       | Non-probability | Household and                   | 5.8%                                                 | Author derived   NR   IgG                                                             | 100.0%, 99.6% (Test developer)                                                       | 4.1% (0.4-6.5%)                                  |

| Article Author (Study Organization)                                             | Sampling Dates (YMD)     | Location                   | Geographic Scope | Overall Risk of Bias | Sample Size | Age                                                                                                       | Female (%) | Sampling method | Sample frame                    | Uncorrected Seroprevalence (95% Confidence Interval) | Test Manufacturers   Names   Isotypes                                        | Test Sens, Spec (Source)                                                             | Corrected Seroprevalence (95% Credible Interval) |
|---------------------------------------------------------------------------------|--------------------------|----------------------------|------------------|----------------------|-------------|-----------------------------------------------------------------------------------------------------------|------------|-----------------|---------------------------------|------------------------------------------------------|------------------------------------------------------------------------------|--------------------------------------------------------------------------------------|--------------------------------------------------|
| Fairbanks School of Public Health) <sup>430</sup>                               |                          |                            |                  |                      |             | 60-79 (n=169);<br>≥80 (n=6)                                                                               |            |                 | community samples               |                                                      |                                                                              | / manufacturer evaluation)                                                           |                                                  |
| Bajema (Centers for Disease Control and Prevention) <sup>428</sup>              | 2020-04-27 to 2020-05-01 | Georgia   Atlanta          | Local            | Moderate             | 1343        | Median 57 (IQR 36-73)                                                                                     | 55.2       | Non-probability | Residual sera                   | 4.2%                                                 | Centers for Disease Control and Prevention (CDC)   CDC SARS-CoV-2 ELISA   NR | 96.0%, 99.3% (Test developer / manufacturer evaluation)                              | 2.7% (0.1-4.8%)                                  |
| Menachemi (Indiana University Fairbanks School of Public Health) <sup>430</sup> | 2020-04-25 to 2020-04-29 | Indiana                    | Regional         | Moderate             | 3518        | <40 (n=1017);<br>40 to 59 (n=1328);<br>≥60 (n=1313)                                                       | 56.7       | Probability     | Household and community samples | 1.1% (0.8-1.5%)                                      | Author derived   NR   IgG                                                    | 100.0%, 99.6% (Test developer / manufacturer evaluation)                             | 0.4% (0.0-1.0%)                                  |
| Chamie (University of California, San Francisco) <sup>436</sup>                 | 2020-04-25 to 2020-04-28 | California   San Francisco | Local            | Moderate             | 3861        | 4-10 (n=109);<br>11-17 (n=135);<br>18-50 (n=2466);<br>51-70 (n=916);<br>>70 (n=190)                       | 42.6       | Non-probability | Household and community samples | 3.4% (2.9-4.1%)                                      | Abbott   Abbott Architect SARS-CoV-2 IgG assay   IgG                         | 0.4%, 1.0% (FINDDx / MUHC independent evaluation)                                    | -                                                |
| Rosenberg (New York State Department of Health) <sup>437</sup>                  | 2020-04-19 to 2020-04-28 | New York                   | Regional         | Moderate             | 15101       | 18-34 (n=3151);<br>35-44 (n=2628);<br>45-54 (n=3345);<br>≥55 (n=5977)                                     | 56.1       | Non-probability | Household and community samples | 14.0% (13.3-14.7%)                                   | NYSDOH Wadsworth Center   SARS-CoV IgG Microsphere Immunoassay   IgG         | 87.9%, 99.8% (Used author-adjusted estimate)                                         | 14.0% (13.5-14.6%)                               |
| Zou (Georgia State University) <sup>438</sup>                                   | 2020-04-17 to 2020-04-27 | Georgia   Atlanta          | Local            | High                 | 127         | NR                                                                                                        | NR         | Non-probability | Household and community samples | 2.4%                                                 | Author-designed   Krammer and colleagues ELISA S1   IgG                      | 75.6%, 97.6% (Used Bastos SR/MA data; no sens, spec, or author adjustment available) | 1.2% (0.0-4.7%)                                  |
| Bryan (University of Washington School of Medicine) <sup>439</sup>              | 2020-04-20 to 2020-04-26 | Idaho   Boise              | Local            | High                 | 4856        | 0-19 (n=240);<br>20-29 (n=301);<br>30-39 (n=831);<br>40-49 (n=1102);<br>50-59 (n=1142);<br>60-69 (n=888); | 54.2       | Non-probability | Household and community samples | 1.8%                                                 | Abbott   Abbott Architect SARS-CoV-2 IgG assay   IgG                         | 0.4%, 1.0% (FINDDx / MUHC independent evaluation)                                    | -                                                |

| Article Author (Study Organization)                             | Sampling Dates (YMD)     | Location                   | Geographic Scope | Overall Risk of Bias | Sample Size | Age                                                                 | Female (%) | Sampling method | Sample frame                    | Uncorrected Seroprevalence (95% Confidence Interval) | Test Manufacturers   Names   Isotypes                                            | Test Sens, Spec (Source)                                  | Corrected Seroprevalence (95% Credible Interval) |
|-----------------------------------------------------------------|--------------------------|----------------------------|------------------|----------------------|-------------|---------------------------------------------------------------------|------------|-----------------|---------------------------------|------------------------------------------------------|----------------------------------------------------------------------------------|-----------------------------------------------------------|--------------------------------------------------|
|                                                                 |                          |                            |                  |                      |             | 70-79 (n=327);<br>≥80 (n=25)                                        |            |                 |                                 |                                                      |                                                                                  |                                                           |                                                  |
| Appa (University of California San Francisco) <sup>441</sup>    | 2020-04-20 to 2020-04-24 | California   Bolinas       | Local            | Moderate             | 1880        | NR                                                                  | NR         | Non-probability | Household and community samples | 0.2%                                                 | University of California   In-House ELISA   IgG                                  | 96.2%, 99.9% (Test developer / manufacturer evaluation)   | 0.1% (0.0-0.3%)                                  |
| Sassoon (OMNI Healthcare) <sup>443</sup>                        | 2020-04-17 to 2020-04-24 | Florida                    | Local            | High                 | 1000        | NR                                                                  | NR         | Non-probability | Household and community samples | 1.0%                                                 | NR   NR   IgG, IgM                                                               | 100.0%, 100.0% (Test developer / manufacturer evaluation) | 0.7% (0.0-1.4%)                                  |
| Dingens (Fred Hutchinson Cancer Research Center) <sup>444</sup> | 2020-03-03 to 2020-04-24 | Washington   Seattle       | Sublocal         | High                 | 1076        | 0-4 (n=192); 5-9 (n=214); 10-14 (n=301); >15 (n=369)                | 49.7       | Non-probability | Residual sera                   | 0.9%                                                 | Abbott; N/A   In-house ELISA assays, Abbott Architect SARS-CoV-2 IgG assay   IgG | No data                                                   | -                                                |
| Morrison (Crush The Curve Idaho) <sup>446</sup>                 | Until 2020-04-22         | Idaho                      | Regional         | High                 | 1946        | NR                                                                  | NR         | Non-probability | Residual sera                   | 1.8%                                                 | University of Washington   NR   IgG                                              | 100.0%, 99.6% (Test developer / manufacturer evaluation)  | 0.8% (0.0-1.7%)                                  |
| Paterson (Baton Rouge General Hospital) <sup>449</sup>          | Until 2020-04-21         | Louisiana   Baton Rouge    | Local            | Unclear              | 432         | NR                                                                  | NR         | Non-probability | Household and community samples | 4.4%                                                 | Mayo Clinic   NR   NR                                                            | No data                                                   | -                                                |
| Naranbhai (Massachusetts General Hospital) <sup>453</sup>       | 2020-04-14 to 2020-04-15 | Massachusetts   Chelsea    | Local            | Moderate             | 200         | Median 46 (IQR 27-55)                                               | 40.0       | Non-probability | Household and community samples | 32.8% (27.2-38.8%)                                   | BioMedomics   BioMedomics SARS-CoV-2 combined IgM/IgG LFA   IgG, IgM             | 90.0%, 99.0% (Used author-adjusted estimate)              | 32.8% (26.3-39.2%)                               |
| Sood (Stanford University School of Medicine) <sup>454</sup>    | 2020-04-10 to 2020-04-14 | California                 | Local            | Moderate             | 863         | 18-34 (n=191); 35-54 (n=475); ≥55 years (n=197)                     | 59.6       | Probability     | Household and community samples | 4.7% (2.5-7.1%)                                      | Premier Biotech   NR   IgG, IgM                                                  | 82.7%, 99.5% (Used author-adjusted estimate)              | 4.7% (3.4-6.2%)                                  |
| Ng (University of California, San Francisco) <sup>455</sup>     | 2020-03-17 to 2020-04-13 | California   San Francisco | Local            | High                 | 387         | ≤19 (n=15); 20-29 (n=28); 30-39 (n=41); 40-49 (n=54); 50-59 (n=68); | 48.1       | Non-probability | Residual sera                   | 0.3% (0.0-0.8%)                                      | Abbott   Abbott Architect SARS-CoV-2 IgG   IgG                                   | 0.4%, 1.0% (FINDDx / MUHC independent evaluation)         | -                                                |

| Article Author (Study Organization)                              | Sampling Dates (YMD)     | Location                                                                                            | Geographic Scope | Overall Risk of Bias | Sample Size | Age                                                                                                                                   | Female (%) | Sampling method | Sample frame                    | Uncorrected Seroprevalence (95% Confidence Interval) | Test Manufacturers   Isotypes                                                                                                                       | Test Sens, Spec (Source)                                | Corrected Seroprevalence (95% Credible Interval) |
|------------------------------------------------------------------|--------------------------|-----------------------------------------------------------------------------------------------------|------------------|----------------------|-------------|---------------------------------------------------------------------------------------------------------------------------------------|------------|-----------------|---------------------------------|------------------------------------------------------|-----------------------------------------------------------------------------------------------------------------------------------------------------|---------------------------------------------------------|--------------------------------------------------|
|                                                                  |                          |                                                                                                     |                  |                      |             | 60-69 (n=71);<br>70-79 (n=56);<br>80-89 (n=20);<br>90-99 (n=5);<br>unknown (n=29)                                                     |            |                 |                                 |                                                      |                                                                                                                                                     |                                                         |                                                  |
| Bendavid (Stanford University School of Medicine) <sup>457</sup> | 2020-04-03 to 2020-04-04 | California                                                                                          | Local            | High                 | 3328        | 0-19 (n=637);<br>20-39 (n=907);<br>40-69 (n=1706);<br>≥70 (n=78)                                                                      | 63.1       | Non-probability | Household and community samples | 2.8% (1.3-4.2%)                                      | Premier Biotech   NR   IgG, IgM                                                                                                                     | 85.6%, 99.5% (Used author-adjusted estimate)            | 2.8% (2.2-3.3%)                                  |
| Ng (University of California, San Francisco) <sup>455</sup>      | 2020-03-01 to 2020-03-31 | California   San Francisco                                                                          | Local            | Moderate             | 1000        | ≤19 (n=18);<br>20-29 (n=152);<br>30-39 (n=205);<br>40-49 (n=172);<br>50-59 (n=185);<br>60-69 (n=197);<br>70-79 (n=63);<br>80-89 (n=7) | 49.1       | Non-probability | Blood donors                    | 0.1% (0.0-0.6%)                                      | Ortho-Clinical Diagnostics; Abbott   Abbott Architect SARS-CoV-2 IgG, VITROS anti-SARS-CoV-2 total antibody, SARS-CoV-2 neutralization assay.   IgG | No data                                                 | -                                                |
| Schuchat (University of Washington) <sup>459</sup>               | 2020-03-01 to 2020-03-31 | Washington   Seattle                                                                                | Local            | High                 | 221         | NR                                                                                                                                    | NR         | Non-probability | Residual sera                   | 0.4%                                                 | NR   NR   NR                                                                                                                                        | No data                                                 | -                                                |
| Basavaraju (American Red Cross) <sup>462</sup>                   | 2019-12-13 to 2020-01-17 | Wisconsin, Oregon, Massachusetts, Michigan, Connecticut, Washington, California, Iowa, Rhode Island | National         | Moderate             | 7389        | 16-29 (n = 895);<br>30-39 (n = 885);<br>40-49 (n = 1070);<br>50-59 (n = 1844);<br>60-69 (n = 1893);<br>70+ (n = 802)                  | 46.0       | Non-probability | Blood donors                    | 1.4%                                                 | CDC   pan-IgG ELISA   NR                                                                                                                            | 96.0%, 99.3% (Test developer / manufacturer evaluation) | 0.6% (0.0-1.1%)                                  |
| <b>Latin America and Caribbean</b>                               |                          |                                                                                                     |                  |                      |             |                                                                                                                                       |            |                 |                                 |                                                      |                                                                                                                                                     |                                                         |                                                  |
| <b>Brazil</b>                                                    |                          |                                                                                                     |                  |                      |             |                                                                                                                                       |            |                 |                                 |                                                      |                                                                                                                                                     |                                                         |                                                  |

| Article Author (Study Organization)                     | Sampling Dates (YMD)     | Location                       | Geographic Scope | Overall Risk of Bias | Sample Size | Age                                                                                                                   | Female (%) | Sampling method | Sample frame                    | Uncorrected Seroprevalence (95% Confidence Interval) | Test Manufacturers   Names   Isotypes                                             | Test Sens, Spec (Source)                                                             | Corrected Seroprevalence (95% Credible Interval) |
|---------------------------------------------------------|--------------------------|--------------------------------|------------------|----------------------|-------------|-----------------------------------------------------------------------------------------------------------------------|------------|-----------------|---------------------------------|------------------------------------------------------|-----------------------------------------------------------------------------------|--------------------------------------------------------------------------------------|--------------------------------------------------|
| Buss (Universidade de Sao Paulo) <sup>463</sup>         | 2020-10-12 to 2020-10-24 | Sao Paulo State   Sao Paulo    | Local            | Moderate             | 877         | NR                                                                                                                    | NR         | Non-probability | Blood donors                    | 18.2% (15.0-21.7%)                                   | Abbott Laboratories   Abbott N IgG Assay   IgG                                    | 92.2%, 96.1% (Used author-adjusted estimate)                                         | 18.2% (15.7-20.8%)                               |
| Buss (Universidade de Sao Paulo) <sup>463</sup>         | 2020-10-10 to 2020-10-17 | Amazonas   Manaus              | Local            | Moderate             | 882         | NR                                                                                                                    | NR         | Non-probability | Blood donors                    | 43.1% (38.3-47.9%)                                   | Abbott Laboratories   Abbott N IgG Assay   IgG                                    | 0.4%, 1.0% (FINDDx / MUHC independent evaluation)                                    | 56.3% (52.5-59.6%)                               |
| Buss (Universidade de Sao Paulo) <sup>463</sup>         | 2020-09-07 to 2020-09-29 | Sao Paulo State   Sao Paulo    | Local            | Moderate             | 933         | NR                                                                                                                    | NR         | Non-probability | Blood donors                    | 15.1% (12.3-18.2%)                                   | Abbott Laboratories   Abbott N IgG Assay   IgG                                    | 92.2%, 96.1% (Used author-adjusted estimate)                                         | 15.1% (12.8-17.4%)                               |
| Buss (Universidade de Sao Paulo) <sup>463</sup>         | 2020-09-05 to 2020-09-14 | Amazonas   Manaus              | Local            | Moderate             | 868         | NR                                                                                                                    | NR         | Non-probability | Blood donors                    | 45.4% (40.8-50.1%)                                   | Abbott Laboratories   Abbott N IgG Assay   IgG                                    | 0.4%, 1.0% (FINDDx / MUHC independent evaluation)                                    | 54.0% (50.4-57.5%)                               |
| Buss (Universidade de Sao Paulo) <sup>463</sup>         | 2020-08-10 to 2020-08-29 | Sao Paulo State   Sao Paulo    | Local            | Moderate             | 906         | NR                                                                                                                    | NR         | Non-probability | Blood donors                    | 15.5% (12.3-18.2%)                                   | Abbott Laboratories   Abbott N IgG Assay   IgG                                    | 92.2%, 96.1% (Used author-adjusted estimate)                                         | 15.5% (13.2-17.9%)                               |
| Buss (Universidade de Sao Paulo) <sup>463</sup>         | 2020-08-08 to 2020-08-19 | Amazonas   Manaus              | Local            | Moderate             | 881         | NR                                                                                                                    | NR         | Non-probability | Blood donors                    | 44.0% (40.0-48.0%)                                   | Abbott Laboratories   Abbott N IgG Assay   IgG                                    | 0.4%, 1.0% (FINDDx / MUHC independent evaluation)                                    | 55.4% (51.8-58.8%)                               |
| daSilva (Federal University of Maranhao) <sup>465</sup> | 2020-07-27 to 2020-08-08 | Maranhao                       | Regional         | Moderate             | 3156        | 1-9 (n=124); 10-19 (n=10-19); 20-29 (n=427); 30-39 (n=475); 40-49 (n=502); 50-59 (n=501); 60-69 (n=409); >70 (n=386). | 62.0       | Probability     | Household and community samples | 40.4% (35.6-45.3%)                                   | Roche Diagnostics   Elecsys Anti-SARS-CoV-2 assay   IgG, IgM                      | 0.8%, 1.0% (FINDDx / MUHC independent evaluation)                                    | 59.6% (57.8-61.5%)                               |
| Oliveira (Universidade de São Paulo) <sup>466</sup>     | 2020-06-30 to 2020-08-04 | State of Sao Paulo   Sao Paulo | Sublocal         | High                 | 439         | 18-39 years old (n=121); 40-59 years (n=185); ≥ 60 years old (n=133)                                                  | 64.5       | Non-probability | Residual sera                   | 13.9%                                                | Roche Diagnostics; DiaSorin S.p.A.   LIAISON® SARS-CoV-2 S1/S2 IgG, Elecsys Anti- | 97.8%, 97.8% (Used Bastos SR/MA data; no sens, spec, or author adjustment available) | 12.4% (9.0-15.9%)                                |

| Article Author (Study Organization)                               | Sampling Dates (YMD)     | Location                    | Geographic Scope | Overall Risk of Bias | Sample Size | Age                                                                                                                                                                    | Female (%) | Sampling method | Sample frame                    | Uncorrected Seroprevalence (95% Confidence Interval) | Test Manufacturers   Names   Isotypes                                                       | Test Sens, Spec (Source)                                                             | Corrected Seroprevalence (95% Credible Interval) |
|-------------------------------------------------------------------|--------------------------|-----------------------------|------------------|----------------------|-------------|------------------------------------------------------------------------------------------------------------------------------------------------------------------------|------------|-----------------|---------------------------------|------------------------------------------------------|---------------------------------------------------------------------------------------------|--------------------------------------------------------------------------------------|--------------------------------------------------|
|                                                                   |                          |                             |                  |                      |             |                                                                                                                                                                        |            |                 |                                 |                                                      | SARSCoV-2 Cobas® assay   IgG                                                                |                                                                                      |                                                  |
| Buss (Universidade de Sao Paulo) <sup>463</sup>                   | 2020-07-01 to 2020-07-31 | Sao Paulo State   Sao Paulo | Local            | Unclear              | 1000        | NR                                                                                                                                                                     | NR         | Non-probability | Blood donors                    | 13.3%                                                | Abbott Laboratories; Roche Diagnostics   Abbott N IgG Assay; Roche Elecsys SARS-CoV-2   IgG | 97.8%, 97.8% (Used Bastos SR/MA data; no sens, spec, or author adjustment available) | 11.7% (9.6-14.1%)                                |
| Paula (Universidade Federal de Mato Grosso (UFMT)) <sup>468</sup> | 2020-04-01 to 2020-07-31 | Mato Grosso   Cuiabá        | Sublocal         | High                 | 6392        | 0-9 (n=168); 10-19 (n= 220); 20-29 (n= 782); 30-39 (n= 1562); 40-49 (1472); 50-59 (n=1076); 60-69 (n=748); 70-79 (n=272); 80-89 (n= 74); 90-100 (n=14); 101-120 (n=4). | 59.7       | Probability     | Residual sera                   | 22.1%                                                | Carlos Chagas Laboratory   SOROVID-19?   IgG, IgM                                           | No data                                                                              | -                                                |
| Buss (Universidade de Sao Paulo) <sup>463</sup>                   | 2020-07-13 to 2020-07-25 | Sao Paulo State   Sao Paulo | Local            | Moderate             | 879         | NR                                                                                                                                                                     | NR         | Non-probability | Blood donors                    | 10.6% (8.1-13.5%)                                    | Abbott Laboratories   Abbott N IgG Assay   IgG                                              | 92.2%, 96.1% (Used author-adjusted estimate)                                         | 10.6% (8.7-12.7%)                                |
| Buss (Universidade de Sao Paulo) <sup>463</sup>                   | 2020-07-06 to 2020-07-15 | Amazonas   Manaus           | Local            | Moderate             | 1147        | NR                                                                                                                                                                     | NR         | Non-probability | Blood donors                    | 46.9% (42.7-51.1%)                                   | Abbott Laboratories   Abbott N IgG Assay   IgG                                              | 0.4%, 1.0% (FINDDx / MUHC independent evaluation)                                    | 52.5% (49.3-55.7%)                               |
| Horta (Universidade Federal de Pelotas) <sup>470</sup>            | 2020-05-14 to 2020-06-24 |                             | National         | Moderate             | 89362       | ≤ 9 (n= 4 263) 10 – 19 (n = 8 024) 20 – 39 (n = 27 485) 40 – 59 (n = 28 402) 60+ (n = 21 188)                                                                          | 58.2       | Probability     | Household and community samples | 2.3%                                                 | China; Guangzhou; Wondfo Biotech; Co.   WONFDO SARS-CoV-2 Antibody Test   IgG, IgM          | 0.7%, 1.0% (FINDDx / MUHC independent evaluation)                                    | -                                                |
| Buss (Universidade de Sao Paulo) <sup>463</sup>                   | 2020-06-08 to 2020-06-20 | Sao Paulo State   Sao Paulo | Local            | Moderate             | 880         | NR                                                                                                                                                                     | NR         | Non-probability | Blood donors                    | 13.1% (10.3-16.3%)                                   | Abbott Laboratories   Abbott N IgG Assay   IgG                                              | 92.2%, 96.1% (Used author-adjusted estimate)                                         | 13.1% (11.0-15.4%)                               |



| Article Author (Study Organization)                                         | Sampling Dates (YMD)     | Location                                  | Geographic Scope | Overall Risk of Bias | Sample Size | Age                                                                                          | Female (%) | Sampling method | Sample frame                    | Uncorrected Seroprevalence (95% Confidence Interval) | Test Manufacturers   Names   Isotypes                                                    | Test Sens, Spec (Source)                          | Corrected Seroprevalence (95% Credible Interval) |
|-----------------------------------------------------------------------------|--------------------------|-------------------------------------------|------------------|----------------------|-------------|----------------------------------------------------------------------------------------------|------------|-----------------|---------------------------------|------------------------------------------------------|------------------------------------------------------------------------------------------|---------------------------------------------------|--------------------------------------------------|
| Picon (Universidade do Vale do Taquari) <sup>471</sup>                      | 2020-06-13 to 2020-06-17 | Rio Grande do Sul   Lajeado               | Local            | Moderate             | 1127        | Median 49.9 (positive); 49.9 (negative) (IQR 31.1 (positive); 26.9 (negative))               | 84.5       | Probability     | Household and community samples | 2.6% (1.8-3.7%)                                      | Guangzhou Wondfo Biotech   Wondfo Lateral Flow Immunoassay   IgG, IgM                    | 76.2%, 99.6% (Used author-adjusted estimate)      | 2.6% (1.8-3.6%)                                  |
| Buss (Universidade de Sao Paulo) <sup>463</sup>                             | 2020-06-05 to 2020-06-15 | Amazonas   Manaus                         | Local            | Moderate             | 911         | NR                                                                                           | NR         | Non-probability | Blood donors                    | 52.7% (48.5-56.9%)                                   | Abbott Laboratories   Abbott N IgG Assay   IgG                                           | 0.4%, 1.0% (FINDDx / MUHC independent evaluation) | 46.5% (42.7-50.0%)                               |
| Picon (Universidade do Vale do Taquari) <sup>471</sup>                      | 2020-05-30 to 2020-06-04 | Rio Grande do Sul   Lajeado               | Local            | Moderate             | 1450        | Median 45.4 (positive); 49.6 (negative) (IQR 24.8 (positive); 27.8 (negative))               | 49.9       | Probability     | Household and community samples | 4.0% (3.1-5.2%)                                      | Guangzhou Wondfo Biotech   Wondfo Lateral Flow Immunoassay   IgG, IgM                    | 76.2%, 99.6% (Used author-adjusted estimate)      | 4.0% (3.1-5.1%)                                  |
| Vieira (Centro de Operações de Emergências em Saúde Pública) <sup>472</sup> | 2020-05-31 to 2020-05-31 | Piauí   Teresina                          | Local            | Moderate             | 900         | NR                                                                                           | NR         | Probability     | Household and community samples | 8.3% (6.6-10.3%)                                     | Wondfo Biotech Co.   WONDFO SARS-CoV-2 Antibody Test   IgG, IgM                          | 0.7%, 1.0% (FINDDx / MUHC independent evaluation) | -                                                |
| Sales (Universidade Federal do Ceará) <sup>473</sup>                        | 2020-05-22 to 2020-05-31 | State of Pernambuco   Fernando de Noronha | Local            | Moderate             | 904         | <10 (n=31), 10-18 (n=46), 19-39 (n=366), 40-58 (n=375), 59-68 (n=69), =>69 (n=17)            | 52.1       | Probability     | Household and community samples | 4.3% (3.2-5.9%)                                      | Ltd.; Guangzhou Wondfo Biotech Co.   SARS-CoV-2 Antibody Test Kit (IgG / IgM)   IgG, IgM | 0.7%, 1.0% (FINDDx / MUHC independent evaluation) | -                                                |
| Jr (Secretaria Municipal de Saude) <sup>474</sup>                           | 2020-05-30 to 2020-05-30 | Biguacu                                   | Local            | Unclear              | 217         | <20 (n=39); 20-30 (n=29); 30-40 (n=46); 40-50 (n=36); 50-60 (n=29); 70-80 (n=19); >80 (n=18) | 58.1       | Probability     | Household and community samples | 0.4%                                                 | NR   NR   NR                                                                             | No data                                           | -                                                |
| Vieira (Centro de Operações de Emergências)                                 | 2020-05-24 to 2020-05-24 | Piauí   Teresina                          | Local            | Moderate             | 900         | NR                                                                                           | NR         | Probability     | Household and community samples | 5.8% (4.3-7.3%)                                      | Wondfo Biotech Co.   WONDFO SARS-CoV-2                                                   | 0.7%, 1.0% (FINDDx / MUHC independent evaluation) | -                                                |

| Article Author (Study Organization)                                         | Sampling Dates (YMD)     | Location                           | Geographic Scope | Overall Risk of Bias | Sample Size | Age                                                                               | Female (%) | Sampling method | Sample frame                    | Uncorrected Seroprevalence (95% Confidence Interval) | Test Manufacturers   Names   Isotypes                                          | Test Sens, Spec (Source)                                 | Corrected Seroprevalence (95% Credible Interval) |
|-----------------------------------------------------------------------------|--------------------------|------------------------------------|------------------|----------------------|-------------|-----------------------------------------------------------------------------------|------------|-----------------|---------------------------------|------------------------------------------------------|--------------------------------------------------------------------------------|----------------------------------------------------------|--------------------------------------------------|
| em Saúde Pública) <sup>472</sup>                                            |                          |                                    |                  |                      |             |                                                                                   |            |                 |                                 |                                                      | Antibody Test   IgG, IgM                                                       |                                                          |                                                  |
| Buss (Universidade de Sao Paulo) <sup>463</sup>                             | 2020-05-08 to 2020-05-21 | Sao Paulo State   Sao Paulo        | Local            | Moderate             | 826         | NR                                                                                | NR         | Non-probability | Blood donors                    | 4.7% (2.6-7.3%)                                      | Abbott Laboratories   Abbott N IgG Assay   IgG                                 | 92.2%, 96.1% (Used author-adjusted estimate)             | 4.7% (3.3-6.2%)                                  |
| Vieira (Centro de Operações de Emergências em Saúde Pública) <sup>472</sup> | 2020-05-17 to 2020-05-17 | Piaui   Teresina                   | Local            | Moderate             | 900         | NR                                                                                | NR         | Probability     | Household and community samples | 3.8% (2.6-5.2%)                                      | Wondfo Biotech Co.   WONDFO SARS-CoV-2 Antibody Test   IgG, IgM                | 0.7%, 1.0% (FINDDx / MUHC independent evaluation)        | -                                                |
| Chioro (Baixada Santista Metropolitan Region) <sup>476</sup>                | 2020-05-13 to 2020-05-15 | São Paulo state   Baixada Santista | Local            | High                 | 2415        | Mean 37.55 (NR)                                                                   | NR         | Probability     | Household and community samples | 2.2%                                                 | Wondfo   Wondfo SARS-CoV-2 test   NR                                           | 0.8%, 1.0% (FINDDx / MUHC independent evaluation)        | -                                                |
| Gomes (Secretaria de Estado da Saúde do Espírito Santo) <sup>477</sup>      | 2020-05-13 to 2020-05-15 | Espírito Santo                     | Regional         | Moderate             | 4612        | <=20 years (n=434); 21-40 (n=1367); 41-60 (n=1583); 61-80 (n=1081); >= 81 (n=143) | 60.9       | Probability     | Household and community samples | 2.1% (1.7-2.5%)                                      | Celer Technologies Inc.   NR   IgG, IgM                                        | 86.4%, 97.6% (Test developer / manufacturer evaluation)  | 0.8% (0.0-2.0%)                                  |
| Gomes (Secretaria de Estado da Saúde do Espírito Santo) <sup>477</sup>      | 2020-05-13 to 2020-05-15 | Espírito Santo                     | Regional         | Moderate             | 1163        | NR                                                                                | NR         | Probability     | Household and community samples | 0.3% (0.1-0.8%)                                      | Celer Technologies Inc.   NR   IgG, IgM                                        | 86.4%, 97.6% (Test developer / manufacturer evaluation)  | 0.1% (0.0-0.5%)                                  |
| Buss (Universidade de Sao Paulo) <sup>463</sup>                             | 2020-05-05 to 2020-05-14 | Amazonas   Manaus                  | Local            | Moderate             | 901         | NR                                                                                | NR         | Non-probability | Blood donors                    | 42.1% (37.5-46.7%)                                   | Abbott Laboratories   Abbott N IgG Assay   IgG                                 | 0.4%, 1.0% (FINDDx / MUHC independent evaluation)        | 57.3% (53.6-60.6%)                               |
| Tess (Universidade de São Paulo) <sup>478</sup>                             | 2020-05-04 to 2020-05-12 | São Paulo   São Paulo              | Local            | Moderate             | 517         | 18-44 (n=269); >= 45 (n=248)                                                      | 54.9       | Probability     | Household and community samples | 4.7% (3.0-6.6%)                                      | SNIBE – Shenzhen New Industries Biomedical Engineering Co.   MAGLUMI 2019-nCoV | 100.0%, 99.5% (Test developer / manufacturer evaluation) | 3.0% (0.0-5.3%)                                  |

| Article Author (Study Organization)                                         | Sampling Dates (YMD)     | Location                                                                                                                                            | Geographic Scope | Overall Risk of Bias | Sample Size | Age                                                                                                                                                         | Female (%) | Sampling method | Sample frame                    | Uncorrected Seroprevalence (95% Confidence Interval) | Test Manufacturers   Names   Isotypes                           | Test Sens, Spec (Source)                                                             | Corrected Seroprevalence (95% Credible Interval) |
|-----------------------------------------------------------------------------|--------------------------|-----------------------------------------------------------------------------------------------------------------------------------------------------|------------------|----------------------|-------------|-------------------------------------------------------------------------------------------------------------------------------------------------------------|------------|-----------------|---------------------------------|------------------------------------------------------|-----------------------------------------------------------------|--------------------------------------------------------------------------------------|--------------------------------------------------|
|                                                                             |                          |                                                                                                                                                     |                  |                      |             |                                                                                                                                                             |            |                 |                                 |                                                      | IgG (CLIA)   IgG, IgM                                           |                                                                                      |                                                  |
| Watanabe (Grupo Fleury) <sup>479</sup>                                      | 2020-05-04 to 2020-05-12 | São Paulo   São Paulo                                                                                                                               | Sublocal         | Unclear              | 520         | NR                                                                                                                                                          | NR         | Probability     | Household and community samples | 5.2%                                                 | NR   NR   NR                                                    | No data                                                                              | -                                                |
| Silveira (Universidade Federal de Pelotas) <sup>480</sup>                   | 2020-05-09 to 2020-05-11 | Rio Grande do Sul   Pelotas, Santa Maria, Canoas, Ijuí, Uruguaiãna, Porto Alegre, Passo Fundo, Santa Cruz do Sul, Caxias                            | Regional         | Low                  | 4500        | 0-9 (n=113);<br>10-19 (n=266);<br>20-29 (n=581);<br>30-39 (n=684);<br>40-49 (n=689);<br>50-59 (n=769);<br>60-69 (n=734);<br>70-79 (n=464);<br>>=80 (n=202); | 58.9       | Probability     | Household and community samples | 0.2% (0.1-0.4%)                                      | Wondfo Biotech Co.   WONDFO SARS-CoV-2 Antibody Test   IgG, IgM | 0.8%, 1.0% (FINDDx / MUHC independent evaluation)                                    | -                                                |
| Vieira (Centro de Operações de Emergências em Saúde Pública) <sup>472</sup> | 2020-05-10 to 2020-05-10 | Piauí   Teresina                                                                                                                                    | Local            | Moderate             | 900         | NR                                                                                                                                                          | NR         | Probability     | Household and community samples | 2.0% (1.2-3.1%)                                      | Wondfo Biotech Co.   WONDFO SARS-CoV-2 Antibody Test   IgG, IgM | 0.7%, 1.0% (FINDDx / MUHC independent evaluation)                                    | -                                                |
| Borges (Federal University of Sergipe) <sup>481</sup>                       | 2020-05-02 to 2020-05-09 | Sergipe   Nossa Senhora do, São Cristóvão, Lagarto, Estância, Tobias Barreto, Itabaiana, Nossa Senhora da Glória, Itabaianinha, Simão Dias, Aracaju | Regional         | High                 | 2635        | Mean 39.76 (SD 16.83)                                                                                                                                       | 59.8       | Non-probability | Household and community samples | 8.3% (7.2-9.4%)                                      | Boditech Med Inc.   Ichroma2™ COVID-19 Ab   IgG                 | 66.0%, 96.6% (Used Bastos SR/MA data; no sens, spec, or author adjustment available) | 7.8% (5.8-9.7%)                                  |

| Article Author (Study Organization)                                          | Sampling Dates (YMD)     | Location                                                                                                                 | Geographic Scope | Overall Risk of Bias | Sample Size | Age                                                                                                                                | Female (%) | Sampling method | Sample frame                    | Uncorrected Seroprevalence (95% Confidence Interval) | Test Manufacturers   Names   Isotypes                           | Test Sens, Spec (Source)                                | Corrected Seroprevalence (95% Credible Interval) |
|------------------------------------------------------------------------------|--------------------------|--------------------------------------------------------------------------------------------------------------------------|------------------|----------------------|-------------|------------------------------------------------------------------------------------------------------------------------------------|------------|-----------------|---------------------------------|------------------------------------------------------|-----------------------------------------------------------------|---------------------------------------------------------|--------------------------------------------------|
| Vieira ( Centro de Operações de Emergências em Saúde Pública) <sup>472</sup> | 2020-05-03 to 2020-05-03 | Piauí   Teresina                                                                                                         | Local            | Moderate             | 900         | NR                                                                                                                                 | NR         | Probability     | Household and community samples | 1.4% (0.8-2.5%)                                      | Wondfo Biotech Co.   WONFDO SARS-CoV-2 Antibody Test   IgG, IgM | 0.7%, 1.0% (FINDDx / MUHC independent evaluation)       | -                                                |
| Buss (Universidade de São Paulo) <sup>463</sup>                              | 2020-04-08 to 2020-04-30 | São Paulo State   São Paulo                                                                                              | Local            | Moderate             | 900         | NR                                                                                                                                 | NR         | Non-probability | Blood donors                    | 4.0% (1.8-6.6%)                                      | Abbott Laboratories   Abbott N IgG Assay   IgG                  | 92.2%, 96.1% (Used author-adjusted estimate)            | 4.0% (2.9-5.4%)                                  |
| Silveira (Universidade Federal de Pelotas) <sup>480</sup>                    | 2020-04-25 to 2020-04-27 | Rio Grande do Sul   Pelotas, Canoas, Santa Maria, Ijuí, Uruguaiãna, Porto Alegre, Passo Fundo, Santa Cruz do Sul, Caxias | Regional         | Low                  | 4501        | 0-9 (n=116); 10-19 (n=227); 20-29 (n=508); 30-39 (n=753); 40-49 (n=647); 50-59 (n=798); 60-69 (n=798); 70-79 (n=459); >=80 (n=156) | 58.9       | Probability     | Household and community samples | 0.1% (0.0-0.3%)                                      | Wondfo Biotech Co.   WONFDO SARS-CoV-2 Antibody Test   IgG, IgM | 0.8%, 1.0% (FINDDx / MUHC independent evaluation)       | -                                                |
| Filho (Universidade do Estado do Rio de Janeiro) <sup>483</sup>              | 2020-04-14 to 2020-04-27 | Rio de Janeiro   Rio de Janeiro                                                                                          | Local            | Moderate             | 2857        | 18-29 (n=870); 30-49 (n=1443); 50-69 (n=544)                                                                                       | 49.2       | Non-probability | Blood donors                    | 4.0% (3.3-4.7%)                                      | MedLevensohn   MedTest Coronavirus 2019-nCoV IgG/IgM   IgG, IgM | 85.0%, 99.0% (Test developer / manufacturer evaluation) | 2.8% (0.0-4.9%)                                  |
| Vieira ( Centro de Operações de Emergências em Saúde Pública) <sup>472</sup> | 2020-04-26 to 2020-04-26 | Piauí   Teresina                                                                                                         | Local            | Moderate             | 900         | NR                                                                                                                                 | NR         | Probability     | Household and community samples | 0.9% (0.4-1.8%)                                      | Wondfo Biotech Co.   WONFDO SARS-CoV-2 Antibody Test   IgG, IgM | 0.7%, 1.0% (FINDDx / MUHC independent evaluation)       | -                                                |
| Vieira ( Centro de Operações de Emergências em Saúde Pública) <sup>472</sup> | 2020-04-19 to 2020-04-19 | Piauí   Teresina                                                                                                         | Local            | Moderate             | 900         | NR                                                                                                                                 | NR         | Probability     | Household and community samples | 0.6% (0.2-1.3%)                                      | Wondfo Biotech Co.   WONFDO SARS-CoV-2 Antibody Test   IgG, IgM | 0.7%, 1.0% (FINDDx / MUHC independent evaluation)       | -                                                |

| Article Author (Study Organization)                       | Sampling Dates (YMD)     | Location                                                                                                                 | Geographic Scope | Overall Risk of Bias | Sample Size | Age                                                                                                                                 | Female (%) | Sampling method | Sample frame                    | Uncorrected Seroprevalence (95% Confidence Interval) | Test Manufacturers   Names   Isotypes                                                                                         | Test Sens, Spec (Source)                                                             | Corrected Seroprevalence (95% Credible Interval) |
|-----------------------------------------------------------|--------------------------|--------------------------------------------------------------------------------------------------------------------------|------------------|----------------------|-------------|-------------------------------------------------------------------------------------------------------------------------------------|------------|-----------------|---------------------------------|------------------------------------------------------|-------------------------------------------------------------------------------------------------------------------------------|--------------------------------------------------------------------------------------|--------------------------------------------------|
| Buss (Universidade de Sao Paulo) <sup>463</sup>           | 2020-04-06 to 2020-04-17 | Amazonas   Manaus                                                                                                        | Local            | Moderate             | 829         | NR                                                                                                                                  | NR         | Non-probability | Blood donors                    | 5.0% (2.9-7.4%)                                      | Abbott Laboratories   Abbott N IgG Assay   IgG                                                                                | 92.2%, 96.1% (Used author-adjusted estimate)                                         | 5.0% (3.6-6.6%)                                  |
| Gurgel (Federal University of Sergipe) <sup>484</sup>     | 2020-01-15 to 2020-04-15 | Sergipe   Aracaju                                                                                                        | Local            | Moderate             | 987         | Mean 38.9 (SD 22.2)                                                                                                                 | 69.2       | Non-probability | Residual sera                   | 1.6%                                                 | Nantong Egens Biotechnology CO; Ltd.; China and Bodytech Med Inc.   Nantong Egens Biotechnology CO, Ltd; iChroma2™   IgG, IgM | 66.0%, 96.6% (Used Bastos SR/MA data; no sens, spec, or author adjustment available) | 0.2% (0.0-0.9%)                                  |
| Silveira (Universidade Federal de Pelotas) <sup>480</sup> | 2020-04-11 to 2020-04-13 | Rio Grande do Sul   Pelotas, Santa Maria, Canoas, Ijuí, Uruguaiãna, Porto Alegre, Passo Fundo, Santa Cruz do Sul, Caxias | Regional         | Low                  | 4151        | 0-9 (n=149); 10-19 (n=224); 20-29 (n=506); 30-39 (n=635); 40-49 (n=643); 50-59 (n=734); 60-69 (n=685); 70-79 (n=3985); >=80 (n=183) | 58.3       | Probability     | Household and community samples | 0.0% (0.0-0.2%)                                      | Wondfo Biotech Co.   WONDFO SARS-CoV-2 Antibody Test   IgG, IgM                                                               | 0.8%, 1.0% (FINDDx / MUHC independent evaluation)                                    | -                                                |
| Buss (Universidade de Sao Paulo) <sup>463</sup>           | 2020-03-09 to 2020-03-21 | Sao Paulo State   Sao Paulo                                                                                              | Local            | Moderate             | 2454        | NR                                                                                                                                  | NR         | Non-probability | Blood donors                    | 2.8% (1.8-3.9%)                                      | Abbott Laboratories   Abbott N IgG Assay   IgG                                                                                | 92.2%, 96.1% (Used author-adjusted estimate)                                         | 2.8% (2.2-3.5%)                                  |
| Buss (Universidade de Sao Paulo) <sup>463</sup>           | 2020-03-06 to 2020-03-12 | Amazonas   Manaus                                                                                                        | Local            | Moderate             | 832         | NR                                                                                                                                  | NR         | Non-probability | Blood donors                    | 0.0% (0.0-0.8%)                                      | Abbott Laboratories   Abbott N IgG Assay   IgG                                                                                | 92.2%, 96.1% (Used author-adjusted estimate)                                         | 0.0% (0.0-0.3%)                                  |
| Buss (Universidade de Sao Paulo) <sup>463</sup>           | 2020-02-08 to 2020-02-29 | Sao Paulo State   Sao Paulo                                                                                              | Local            | Moderate             | 799         | NR                                                                                                                                  | NR         | Non-probability | Blood donors                    | 1.0% (0.0-2.9%)                                      | Abbott Laboratories   Abbott N IgG Assay   IgG                                                                                | 92.2%, 96.1% (Used author-adjusted estimate)                                         | 1.0% (0.4-1.7%)                                  |

| Article Author (Study Organization)                          | Sampling Dates (YMD)     | Location                    | Geographic Scope | Overall Risk of Bias | Sample Size | Age                        | Female (%) | Sampling method | Sample frame                    | Uncorrected Seroprevalence (95% Confidence Interval) | Test Manufacturers   Names   Isotypes                                                           | Test Sens, Spec (Source)                                                             | Corrected Seroprevalence (95% Credible Interval) |
|--------------------------------------------------------------|--------------------------|-----------------------------|------------------|----------------------|-------------|----------------------------|------------|-----------------|---------------------------------|------------------------------------------------------|-------------------------------------------------------------------------------------------------|--------------------------------------------------------------------------------------|--------------------------------------------------|
| Buss (Universidade de Sao Paulo) <sup>463</sup>              | 2020-02-07 to 2020-02-13 | Amazonas   Manaus           | Local            | Moderate             | 821         | NR                         | NR         | Non-probability | Blood donors                    | 0.4% (0.0-3.3%)                                      | Abbott Laboratories   Abbott N IgG Assay   IgG                                                  | 92.2%, 96.1% (Used author-adjusted estimate)                                         | 0.4% (0.1-1.0%)                                  |
| <b>Columbia</b>                                              |                          |                             |                  |                      |             |                            |            |                 |                                 |                                                      |                                                                                                 |                                                                                      |                                                  |
| Mattar (Universidad de Córdoba) <sup>485</sup>               | 2020-08-04 to 2020-09-01 | Caribbean Region   Monteria | Local            | Moderate             | 1368        | NR                         | 57.8       | Probability     | Household and community samples | 55.3% (52.5-57.8%)                                   | Ingenasa   INgezim COVID 19 DR test   IgG, IgA, IgM                                             | 92.0%, 100.0% (Author-reported independent evaluation)                               | 59.4% (50.4-68.7%)                               |
| <b>Dominican Republic</b>                                    |                          |                             |                  |                      |             |                            |            |                 |                                 |                                                      |                                                                                                 |                                                                                      |                                                  |
| Paulino-Ramirez (Universidad Iberoamericana) <sup>489</sup>  | 2020-04-15 to 2020-06-15 |                             | National         | High                 | 12897       | Mean 42 (NR)               | 48.8       | Probability     | Household and community samples | 5.5%                                                 | GenBody Inc.   Confiscope G20   IgG                                                             | 56.7%, 100.0% (Test developer / manufacturer evaluation)                             | 8.3% (3.2-13.0%)                                 |
| <b>Ecuador</b>                                               |                          |                             |                  |                      |             |                            |            |                 |                                 |                                                      |                                                                                                 |                                                                                      |                                                  |
| Brutto (Universidad Peruana Cayetano Heredia) <sup>490</sup> | 2020-06-25 to 2020-06-30 | Atahualpa                   | Local            | High                 | 362         | Mean 59.9 (SD 13)          | 56.6       | Probability     | Household and community samples | 7.7%                                                 | BIOHIT Health Care   BIOHIT SARS-CoV-2 antibody test   IgG, IgM                                 | 66.0%, 96.6% (Used Bastos SR/MA data; no sens, spec, or author adjustment available) | 6.7% (2.3-11.2%)                                 |
| Brutto (Universidad Peruana Cayetano Heredia) <sup>491</sup> | 2020-05-01 to 2020-05-25 | El Oro                      | Local            | Moderate             | 673         | Mean 59.2 (SD 12.8)        | 56.6       | Probability     | Household and community samples | 45.0%                                                | Biohit Health Care Ltd   BIOHIT SARS-CoV-2 antibody test kit (Colloidal gold method)   IgG, IgM | 66.0%, 96.6% (Used Bastos SR/MA data; no sens, spec, or author adjustment available) | 66.3% (60.1-72.3%)                               |
| <b>French Guiana</b>                                         |                          |                             |                  |                      |             |                            |            |                 |                                 |                                                      |                                                                                                 |                                                                                      |                                                  |
| Flamand (Institut Pasteur) <sup>492</sup>                    | 2020-07-15 to 2020-07-23 |                             | National         | Moderate             | 480         | Mean 38.3 (Range 0.2 - 87) | 68.1       | Non-probability | Residual sera                   | 15.4% (9.3-24.4%)                                    | Euroimmun   anti-SARS-CoV-2 IgG ELISA   IgG                                                     | 0.6%, 0.9% (FINDDx / MUHC independent evaluation)                                    | -                                                |
| <b>Honduras</b>                                              |                          |                             |                  |                      |             |                            |            |                 |                                 |                                                      |                                                                                                 |                                                                                      |                                                  |

| Article Author (Study Organization)                                                                                  | Sampling Dates (YMD)     | Location                    | Geographic Scope | Overall Risk of Bias | Sample Size | Age                        | Female (%) | Sampling method | Sample frame                    | Uncorrected Seroprevalence (95% Confidence Interval) | Test Manufacturers   Names   Isotypes                                     | Test Sens, Spec (Source)                                                             | Corrected Seroprevalence (95% Credible Interval) |
|----------------------------------------------------------------------------------------------------------------------|--------------------------|-----------------------------|------------------|----------------------|-------------|----------------------------|------------|-----------------|---------------------------------|------------------------------------------------------|---------------------------------------------------------------------------|--------------------------------------------------------------------------------------|--------------------------------------------------|
| Núñez (Colegio Médico) <sup>493</sup>                                                                                | 2020-06-16 to 2020-06-23 |                             | National         | Moderate             | 792         | Median 37 (IQR 27-50)      | 54.7       | Probability     | Household and community samples | 6.2%                                                 | NR   NR   IgG, IgM                                                        | 93.4%, 97.7% (Test developer / manufacturer evaluation)                              | 3.7% (0.0-6.6%)                                  |
| <b>Mexico</b>                                                                                                        |                          |                             |                  |                      |             |                            |            |                 |                                 |                                                      |                                                                           |                                                                                      |                                                  |
| Martínez-Acuña (Autonomous University of Nuevo Leon) <sup>495</sup>                                                  | 2020-01-01 to 2020-08-30 | Nuevo Leon                  | Regional         | High                 | 1968        | Mean 34.8 (Range 18 to 65) | 27.0       | Non-probability | Blood donors                    | 4.0%                                                 | Abbott Laboratories   SARS-CoV-2 IgG ARCHITECT   IgG                      | 0.4%, 1.0% (FINDDx / MUHC independent evaluation)                                    | -                                                |
| Remes-Troche (Universidad Veracruzana) <sup>496</sup>                                                                | 2020-06-01 to 2020-07-31 | Veracruz City               | Sublocal         | High                 | 2174        | Mean 41.8 (Range 18-98)    | 53.6       | Non-probability | Residual sera                   | 29.5% (27.6-31.5%)                                   | Ortho-Clinical Diagnostics; Abbott   Abbott SARS- CoV-2 IgG assay   IgG   | 0.4%, 1.0% (FINDDx / MUHC independent evaluation)                                    | -                                                |
| <b>Panama</b>                                                                                                        |                          |                             |                  |                      |             |                            |            |                 |                                 |                                                      |                                                                           |                                                                                      |                                                  |
| Villarreal (Instituto de Investigaciones Científicas y Servicios de Alta Tecnología (INDICASAT -AIP)) <sup>498</sup> | 2020-04-30 to 2020-07-07 | Colon, Panama               | National         | High                 | 255         | Median 73.2 (SD 11.1)      | 29.0       | Non-probability | Blood donors                    | 11.7% (8.3-16.3%)                                    | N/A - Author Designed   Chinese Academy of Science Test (CAST)   IgG, IgM | 87.0%, 98.9% (Test developer / manufacturer evaluation)                              | 11.4% (4.5-17.6%)                                |
| <b>Paraguay</b>                                                                                                      |                          |                             |                  |                      |             |                            |            |                 |                                 |                                                      |                                                                           |                                                                                      |                                                  |
| Ultimahora (Ministerio de Salud Pública) <sup>499</sup>                                                              | 2020-11-29 to 2020-12-15 | Ciudad del Este             | Local            | Unclear              | 1675        | NR                         | NR         | Non-probability | Household and community samples | 30.0%                                                | NR   NR   NR                                                              | No data                                                                              | -                                                |
| <b>Peru</b>                                                                                                          |                          |                             |                  |                      |             |                            |            |                 |                                 |                                                      |                                                                           |                                                                                      |                                                  |
| Peruvian Government (National Center for Epidemiology, Prevention and Control of Diseases) <sup>501</sup>            | 2020-06-28 to 2020-07-09 | Callao, Lima   Callao, Lima | Local            | High                 | 3118        | NR                         | NR         | Probability     | Household and community samples | 21.6% (18.7-24.6%)                                   | NR   NR   IgG, IgM                                                        | 66.0%, 96.6% (Used Bastos SR/MA data; no sens, spec, or author adjustment available) | 29.1% (26.4-31.4%)                               |

| Article Author (Study Organization)                                  | Sampling Dates (YMD)     | Location                                                                                                                                         | Geographic Scope | Overall Risk of Bias | Sample Size | Age                                                                                              | Female (%) | Sampling method | Sample frame                    | Uncorrected Seroprevalence (95% Confidence Interval) | Test Manufacturers   Names   Isotypes                                   | Test Sens, Spec (Source)                                 | Corrected Seroprevalence (95% Credible Interval) |
|----------------------------------------------------------------------|--------------------------|--------------------------------------------------------------------------------------------------------------------------------------------------|------------------|----------------------|-------------|--------------------------------------------------------------------------------------------------|------------|-----------------|---------------------------------|------------------------------------------------------|-------------------------------------------------------------------------|----------------------------------------------------------|--------------------------------------------------|
| Angulo-Bazán (National Institute of Health (INS)) <sup>502</sup>     | 2020-04-23 to 2020-05-02 | Lima   Lima                                                                                                                                      | Local            | Moderate             | 236         | Mean 36.2 (SD 20.1)                                                                              | 54.7       | Non-probability | Household and community samples | 53.0%                                                | Core Technology Co. Ltd   Coretests COVID-19 IgM/IgG Ab Test   IgG, IgM | 97.6%, 100.0% (Test developer / manufacturer evaluation) | 55.8% (47.9-65.8%)                               |
| <b>North Africa and Middle East</b>                                  |                          |                                                                                                                                                  |                  |                      |             |                                                                                                  |            |                 |                                 |                                                      |                                                                         |                                                          |                                                  |
| <b>Iran</b>                                                          |                          |                                                                                                                                                  |                  |                      |             |                                                                                                  |            |                 |                                 |                                                      |                                                                         |                                                          |                                                  |
| Poustchi (Tehran University of Medical Sciences) <sup>505</sup>      | 2020-04-17 to 2020-06-02 | Kerman, Shiraz, Esfahan, Urmia, Tehran, Ardabil, Ahvaz, Sari, Qom, Zahedan, Hamedan, Sanandaj, Kermanshah, Mashhad, Gorgan, Tabriz, Babol, Rasht | National         | Low                  | 3530        | ≤19 (n = 140); 20–29 (n = 470); 30–39 (n = 992); 40–49 (n = 937); 50–59 (n = 590); ≥60 (n = 401) | 49.2       | Probability     | Household and community samples | 12.9% (11.3-14.5%)                                   | Pishtaz Teb   PT-SARS-COV-2.IgM-96 and PT-SARS-COV-2.IgG-96   IgG, IgM  | 66.9%, 98.2% (Author-reported independent evaluation)    | 16.2% (10.7-20.6%)                               |
| Shakiba (Tehran University of Medical Sciences) <sup>509</sup>       | 2020-04-11 to 2020-04-19 | Guilan                                                                                                                                           | Regional         | Moderate             | 528         | <5 (n = 26) ; 5-17 (n = 101) ; 18-59 (n = 329) ; 60+ (n=72)                                      | 51.3       | Probability     | Household and community samples | 22.2% (16.4-28.5%)                                   | VivaChek   VivaDiag Rapid test kit   IgG, IgM                           | 83.3%, 99.0% (Used author-adjusted estimate)             | 22.2% (18.8-25.8%)                               |
| <b>Libya</b>                                                         |                          |                                                                                                                                                  |                  |                      |             |                                                                                                  |            |                 |                                 |                                                      |                                                                         |                                                          |                                                  |
| Elfakhri (The Center of Infectious Diseases-Benghazi) <sup>513</sup> | 2020-05-02 to 2020-05-07 | Benghazi                                                                                                                                         | Local            | Moderate             | 600         | Mean 38.2 (SD 17.5)                                                                              | 50.5       | Probability     | Household and community samples | 0.0%                                                 | Biotest   Right Sign (Lot No. COV20030003)   IgG, IgM                   | 81.7%, 96.7% (Test developer / manufacturer evaluation)  | 0.2% (0.0-0.7%)                                  |
| <b>Saudi Arabia</b>                                                  |                          |                                                                                                                                                  |                  |                      |             |                                                                                                  |            |                 |                                 |                                                      |                                                                         |                                                          |                                                  |



| Article Author (Study Organization)                                           | Sampling Dates (YMD)     | Location           | Geographic Scope | Overall Risk of Bias | Sample Size | Age                                                         | Female (%) | Sampling method | Sample frame                    | Uncorrected Seroprevalence (95% Confidence Interval) | Test Manufacturers   Names   Isotypes       | Test Sens, Spec (Source)                                                             | Corrected Seroprevalence (95% Credible Interval) |
|-------------------------------------------------------------------------------|--------------------------|--------------------|------------------|----------------------|-------------|-------------------------------------------------------------|------------|-----------------|---------------------------------|------------------------------------------------------|---------------------------------------------|--------------------------------------------------------------------------------------|--------------------------------------------------|
| Mahallawi (Taibah University) <sup>517</sup>                                  | 2020-05-15 to 2020-07-15 | Al-Madinah         | Local            | High                 | 1212        | Mean 31.73 (SD 9.05)                                        | 0.0        | Non-probability | Blood donors                    | 19.3% (17.1-21.6%)                                   | In-house; NR   In-house ELISA, NR   IgG     | No data                                                                              | -                                                |
| <b>Turkey</b>                                                                 |                          |                    |                  |                      |             |                                                             |            |                 |                                 |                                                      |                                             |                                                                                      |                                                  |
| Sozcu (Unclear (Turkey Ministry of Health)) <sup>520</sup>                    | 2020-06-15 to 2020-06-25 |                    | National         | Unclear              | 132000      | NR                                                          | NR         | Non-probability | Household and community samples | 0.8%                                                 | NR   NR   NR                                | 75.6%, 97.6% (Used Bastos SR/MA data; no sens, spec, or author adjustment available) | 0.0% (0.0-0.1%)                                  |
| <b>South Asia</b>                                                             |                          |                    |                  |                      |             |                                                             |            |                 |                                 |                                                      |                                             |                                                                                      |                                                  |
| <b>India</b>                                                                  |                          |                    |                  |                      |             |                                                             |            |                 |                                 |                                                      |                                             |                                                                                      |                                                  |
| Khan (Government Medical College Sringer) <sup>522</sup>                      | 2020-10-17 to 2020-11-04 |                    | Regional         | Low                  | 6230        | 18-29 (n=1513); 30-49 (n=2672); 50-69 (n=1643); >70 (n=402) | 49.8       | Probability     | Household and community samples | 36.7% (34.3-39.2%)                                   | Abbott   Abbott SARS-CoV-2 IgG assay   IgG  | 100.0%, 99.6% (Used author-adjusted estimate)                                        | 36.7% (35.5-37.9%)                               |
| Kumar (Unclear) <sup>523</sup>                                                | 2020-10-18 to 2020-10-24 | Haryan             | Regional         | Unclear              | 16477       | NR                                                          | NR         | Probability     | Household and community samples | 14.8%                                                | NR   NR   NR                                | No data                                                                              | -                                                |
| Sharma (Government of National Capital Territory of Delhi) <sup>524</sup>     | 2020-10-15 to 2020-10-21 | NCT Delhi          | Regional         | Low                  | 15015       | <18 (n=2430); 18-49 (n=9420); =>50 (n=3043)                 | 52.9       | Probability     | Household and community samples | 25.2% (24.5-25.9%)                                   | NR   ERBALISA COVID-19 IgG   IgG            | 99.1%, 99.3% (Test developer / manufacturer evaluation)                              | 25.0% (20.8-29.2%)                               |
| Ramanath (The Regional Medical Research Centre in Bhubaneswar) <sup>525</sup> | 2020-10-16 to 2020-10-18 | Bhubaneswar        | Local            | Unclear              | 1403        | NR                                                          | NR         | Probability     | Household and community samples | 50.0%                                                | NR   NR   NR                                | No data                                                                              | -                                                |
| Banerjee (Dr DY Patil Medical College) <sup>526</sup>                         | 2020-10-07 to 2020-10-17 | Maharashtra   Pune | Local            | Moderate             | 5000        | NR                                                          | NR         | Probability     | Household and community samples | 34.0% (31.3-36.8%)                                   | IL; Abbott Chicago; USA.   Abbott IgG   IgG | 92.7%, 99.9% (Used author-adjusted estimate)                                         | 34.0% (32.7-35.4%)                               |

| Article Author (Study Organization)                                                                                                      | Sampling Dates (YMD)     | Location                                  | Geographic Scope | Overall Risk of Bias | Sample Size | Age                                                                                                            | Female (%) | Sampling method | Sample frame                    | Uncorrected Seroprevalence (95% Confidence Interval) | Test Manufacturers   Names   Isotypes                                                 | Test Sens, Spec (Source)                                                             | Corrected Seroprevalence (95% Credible Interval) |
|------------------------------------------------------------------------------------------------------------------------------------------|--------------------------|-------------------------------------------|------------------|----------------------|-------------|----------------------------------------------------------------------------------------------------------------|------------|-----------------|---------------------------------|------------------------------------------------------|---------------------------------------------------------------------------------------|--------------------------------------------------------------------------------------|--------------------------------------------------|
| Babu (Indian Institute of Public Health) <sup>527</sup>                                                                                  | 2020-09-03 to 2020-09-16 | Karnataka                                 | Regional         | Moderate             | 15939       | 18-29 (n=5184); 30-39 (n=3353); 40-49 (n=2447); 50-59 (n=1792); >=60 (n=2848)                                  | 51.2       | Non-probability | Household and community samples | 16.1%                                                | India; Zydus Cadila   Covid Kavach Anti SARS-CoV-2 IgG antibody detection ELISA   IgG | 92.1%, 99.8% (Test developer / manufacturer evaluation)                              | 16.3% (11.4-20.0%)                               |
| Sharma (Government of National Capital Territory of Delhi) <sup>524</sup>                                                                | 2020-09-01 to 2020-09-07 | NCT Delhi                                 | Regional         | Low                  | 17409       | <18 (n=3013); 18-49 (n=10544); >=50 (n=3392)                                                                   | 52.3       | Probability     | Household and community samples | 24.6% (23.9-25.2%)                                   | NR   ERBALISA COVID-19 IgG   IgG                                                      | 99.1%, 99.3% (Test developer / manufacturer evaluation)                              | 24.3% (20.3-28.1%)                               |
| Kshatri (Indian Council of Medical Research-Regional Medical Research Centre in Bhubaneswar (ICMR-RMRC) Serosurvey group) <sup>529</sup> | 2020-08-01 to 2020-08-31 | Odisha   Bhubaneswar, Berhampur, Rourkela | Local            | High                 | 4146        | Mean 44.2 (NR)                                                                                                 | 37.5       | Probability     | Household and community samples | 20.8% (19.6-22.1%)                                   | NR   Elecsys® Anti-SARS-CoV-2   NR                                                    | 0.9%, 1.0% (FINDDx / MUHC independent evaluation)                                    | -                                                |
| Singh (The Times of India) <sup>530</sup>                                                                                                | 2020-08-27 to 2020-08-30 | Madhya Pradesh                            | Regional         | Unclear              | 3000        | NR                                                                                                             | NR         | Non-probability | Household and community samples | 11.9%                                                | NR   NR   NR                                                                          | No data                                                                              | -                                                |
| Mohanani (Mapmygenome) <sup>531</sup>                                                                                                    | 2020-06-15 to 2020-08-29 | Karnataka                                 | Regional         | Moderate             | 1197        | 12 or 15-24 (n = 192) ; 25-39 (n=363) ; 40-59 (n = 742) ; >= 60 (n = 111)                                      | NR         | Probability     | Household and community samples | 39.6% (35.7-43.4%)                                   | India; Translational Health Science and Technology Institute   NR   IgG               | 84.7%, 100.0% (Test developer / manufacturer evaluation)                             | 48.1% (39.9-59.3%)                               |
| Dixit (Government Medical School, Aurangabad) <sup>533</sup>                                                                             | 2020-08-10 to 2020-08-19 | Maharashtra                               | Local            | Moderate             | 6571        | 18-20 (n = 367); 21-30 (n = 1732); 31-40 (n = 1844); 41-50 (n = 1356); 51-60 (n = 761); 61-70 (n = 427); 71-80 | NR         | Probability     | Household and community samples | 5.8%                                                 | NR   NR   IgG                                                                         | 75.6%, 97.6% (Used Bastos SR/MA data; no sens, spec, or author adjustment available) | 4.5% (2.9-5.8%)                                  |

| Article Author (Study Organization)                                       | Sampling Dates (YMD)     | Location              | Geographic Scope | Overall Risk of Bias | Sample Size | Age                                                                        | Female (%) | Sampling method | Sample frame                    | Uncorrected Seroprevalence (95% Confidence Interval) | Test Manufacturers   Names   Isotypes                                                              | Test Sens, Spec (Source)                                                             | Corrected Seroprevalence (95% Credible Interval) |
|---------------------------------------------------------------------------|--------------------------|-----------------------|------------------|----------------------|-------------|----------------------------------------------------------------------------|------------|-----------------|---------------------------------|------------------------------------------------------|----------------------------------------------------------------------------------------------------|--------------------------------------------------------------------------------------|--------------------------------------------------|
|                                                                           |                          |                       |                  |                      |             | (n = 99); >80<br>(n = 23)                                                  |            |                 |                                 |                                                      |                                                                                                    |                                                                                      |                                                  |
| Ray (All India Institute of Medical Sciences) <sup>535</sup>              | 2020-06-08 to 2020-08-08 | Punjab   New Delhi    | Local            | High                 | 212         | Mean 41.2 (SD 15.4)                                                        | 44.8       | Non-probability | Residual sera                   | 19.8% (14.7-25.8%)                                   | "Translational Health Science and Technology Institute (THSTI); Faridabad"   THSTI ELISA IgG   IgG | 88.2%, 99.8% (Test developer / manufacturer evaluation)                              | 21.0% (13.8-30.1%)                               |
| Satpati (Medical College Kolkata) <sup>536</sup>                          | 2020-07-26 to 2020-08-08 | West Bengal           | Regional         | Moderate             | 458         | 0-5 (n=1); 11-19 (n=28); 20-45 (n=290); 46-59 (n=101); 60 and above (n=38) | 37.3       | Probability     | Household and community samples | 4.2% (2.5-6.4%)                                      | Calbiotech Inc.   ErbaLisa COVID-19 IgG ELISA Kit   IgG                                            | 98.3%, 98.1% (Test developer / manufacturer evaluation)                              | 2.0% (0.0-4.6%)                                  |
| Bedi (National Centre for Disease Control) <sup>537</sup>                 | 2020-08-01 to 2020-08-07 | NCT Delhi             | Regional         | Unclear              | 15289       | NR                                                                         | NR         | Non-probability | Blood donors                    | 28.3%                                                | NR   NR   NR                                                                                       | No data                                                                              | -                                                |
| Sharma (Government of National Capital Territory of Delhi) <sup>524</sup> | 2020-08-01 to 2020-08-07 | NCT Delhi             | Regional         | Low                  | 15046       | <18 (n=2446); 18-49 (n=9191); >=50 (n=3036)                                | 49.5       | Non-probability | Household and community samples | 28.8% (28.1-29.6%)                                   | NR   ELISA COVID-Kavach IgG   IgG                                                                  | 92.1%, 97.7% (Test developer / manufacturer evaluation)                              | 30.1% (25.2-37.0%)                               |
| Dey (National Centre for Disease Control) <sup>538</sup>                  | 2020-08-01 to 2020-08-07 | NCT Delhi   New Delhi | Local            | Unclear              | 15311       | NR                                                                         | NR         | Non-probability | Household and community samples | 29.1% (28.5-29.9%)                                   | ICMR-National Institute of Virology   KOVID KAVACH ELISA test   IgG                                | 92.4%, 97.9% (Test developer / manufacturer evaluation)                              | 30.4% (24.1-36.7%)                               |
| Ghose (Indian Institute of Science Education and Research) <sup>539</sup> | 2020-07-20 to 2020-08-05 | Maharashtra   Pune    | Local            | Moderate             | 1659        | 18-30 (n=394); 31-50 (n=677); 51-65 (n=417); >65 (n=171)                   | 48.3       | Probability     | Household and community samples | 51.3% (39.9-62.4%)                                   | In-house developed.   THSTI RBD-IgG ELISA   IgG                                                    | 75.6%, 97.6% (Used Bastos SR/MA data; no sens, spec, or author adjustment available) | 66.8% (62.4-70.8%)                               |
| Malani (Tata Institute for                                                | 2020-06-29 to 2020-07-19 | Mumbai                | Local            | Low                  | 2702        | 12-24 (n=176), 25-39 (n=733), 40-60                                        | 29.7       | Probability     | Household and                   | 17.1% (15.8-18.4%)                                   | Abbott Laboratories   Abbott                                                                       | 90.0%, 99.0% (Used author-                                                           | 17.1% (15.7-18.6%)                               |

| Article Author (Study Organization)                         | Sampling Dates (YMD)     | Location                                                  | Geographic Scope | Overall Risk of Bias | Sample Size | Age                                                    | Female (%) | Sampling method | Sample frame                    | Uncorrected Seroprevalence (95% Confidence Interval) | Test Manufacturers   Names   Isotypes                               | Test Sens, Spec (Source)                                                             | Corrected Seroprevalence (95% Credible Interval) |
|-------------------------------------------------------------|--------------------------|-----------------------------------------------------------|------------------|----------------------|-------------|--------------------------------------------------------|------------|-----------------|---------------------------------|------------------------------------------------------|---------------------------------------------------------------------|--------------------------------------------------------------------------------------|--------------------------------------------------|
| Fundamental Research) <sup>541</sup>                        |                          |                                                           |                  |                      |             | (n=1349), 61+ (n=444)                                  |            |                 | community samples               |                                                      | Diagnostics Architect   IgG                                         | adjusted estimate)                                                                   |                                                  |
| Husain (King George's Medical University) <sup>542</sup>    | 2020-07-05 to 2020-07-19 | Uttar Pradesh   Lucknow                                   | Local            | High                 | 1235        | NR                                                     | NR         | Non-probability | Blood donors                    | 3.7%                                                 | NR   NR   IgG                                                       | No data                                                                              | -                                                |
| India.com News Desk (Thyrocare) <sup>543</sup>              | 2020-06-28 to 2020-07-19 |                                                           | National         | High                 | 53000       | NR                                                     | NR         | Probability     | Household and community samples | 15.0%                                                | NR   NR   NR                                                        | No data                                                                              | -                                                |
| Khan (Government Medical College Srinagar) <sup>544</sup>   | 2020-07-01 to 2020-07-15 | Srinagar   District Srinagar                              | Regional         | Moderate             | 2906        | <30 (n=836); 30-49 (n=1424); 50-69 (n=556); >70 (n=90) | 49.7       | Non-probability | Residual sera                   | 3.6% (2.9-4.3%)                                      | Abbott   ARCHITECT i2000SR analyzer   IgG                           | 0.4%, 1.0% (FINDDx / MUHC independent evaluation)                                    | -                                                |
| Mishra (Haryana Health Department) <sup>545</sup>           | 2020-06-21 to 2020-07-15 | Haryana   Panchkula, Sonipat, Faridabad, Gurugram, Ambala | Regional         | High                 | 1544        | NR                                                     | NR         | Probability     | Household and community samples | 12.0%                                                | NR   NR   IgG                                                       | 75.6%, 97.6% (Used Bastos SR/MA data; no sens, spec, or author adjustment available) | 13.0% (10.5-15.6%)                               |
| Saxena (Indian Center for Disease Control) <sup>547</sup>   | 2020-06-27 to 2020-07-10 | NCT Delhi                                                 | Regional         | Moderate             | 21387       | NR                                                     | NR         | Probability     | Household and community samples | 23.5%                                                | Zydus Cadila Healthcare   COVID KAVACH   IgG                        | 98.7%, 100.0% (Test developer / manufacturer evaluation)                             | 24.0% (20.9-27.9%)                               |
| Dey (National Centre for Disease Control) <sup>538</sup>    | 2020-06-26 to 2020-07-10 | NCT Delhi   New Delhi                                     | Local            | Unclear              | 21387       | NR                                                     | NR         | Non-probability | Household and community samples | 23.5% (23.0-24.0%)                                   | ICMR-National Institute of Virology   KOVID KAVACH ELISA test   IgG | 92.4%, 97.9% (Test developer / manufacturer evaluation)                              | 23.8% (18.6-29.2%)                               |
| Prakash (Municipal Medical College) <sup>548</sup>          | 2020-06-16 to 2020-07-07 | Gujarat   Ahmedabad                                       | Local            | High                 | 29891       | Mean 39.1 (SD 14.54)                                   | 46.3       | Non-probability | Residual sera                   | 17.6% (17.2-18.0%)                                   | Zydus Diagnostics   'Covid Kavach   IgG                             | 92.4%, 97.9% (Test developer / manufacturer evaluation)                              | 16.9% (12.0-21.6%)                               |
| Kumar (Thiruvananthapuram Health Department) <sup>552</sup> | 2020-06-09 to 2020-06-12 | Kerala   Thiruvananthapuram                               | Local            | Unclear              | 450         | NR                                                     | NR         | Non-probability | Household and community samples | 2.7%                                                 | NR   NR   IgG, IgM                                                  | No data                                                                              | -                                                |

| Article Author (Study Organization)                          | Sampling Dates (YMD)     | Location                                                                                                                                                                                                                                             | Geographic Scope | Overall Risk of Bias | Sample Size | Age                 | Female (%) | Sampling method | Sample frame                    | Uncorrected Seroprevalence (95% Confidence Interval) | Test Manufacturers   Isotypes                                                                                                               | Test Sens, Spec (Source)                                                             | Corrected Seroprevalence (95% Credible Interval) |
|--------------------------------------------------------------|--------------------------|------------------------------------------------------------------------------------------------------------------------------------------------------------------------------------------------------------------------------------------------------|------------------|----------------------|-------------|---------------------|------------|-----------------|---------------------------------|------------------------------------------------------|---------------------------------------------------------------------------------------------------------------------------------------------|--------------------------------------------------------------------------------------|--------------------------------------------------|
| Murhekar (Indian Council of Medical Research) <sup>554</sup> | 2020-05-11 to 2020-06-04 |                                                                                                                                                                                                                                                      | National         | Low                  | 28000       | Mean 45.3 (SD 15.2) | 51.4       | Probability     | Household and community samples | 0.6% (0.3-1.0%)                                      | Cadila Healthcare Limited; EUROIMMUN   COVID Kavach-Anti-SARS-CoV-2 IgG Antibody Detection ELISA, Euroimmun Anti-SARS-CoV-2 ELISA IgG   IgG | 75.6%, 97.6% (Used Bastos SR/MA data; no sens, spec, or author adjustment available) | 0.0% (0.0-0.1%)                                  |
| Kher (Indian Council of Medical Research) <sup>555</sup>     | 2020-05-11 to 2020-05-25 | Uttarakhand, Kashmir, Rajasthan, Jharkhand, Punjab, Gujarat, Haryana, Assam, Telangana, Maharashtra, Madhya Pradesh, Jammu, Chhattisgarh, West Bengal, Tamil Nadu, Bihar, Uttar Pradesh, Himachal Pradesh, Kerala, Karnataka, Andhra Pradesh, Odisha | National         | Moderate             | 26400       | NR                  | NR         | Probability     | Household and community samples | 0.7%                                                 | ICMR-National Institute of Virology   NR   IgG                                                                                              | 75.6%, 97.6% (Used Bastos SR/MA data; no sens, spec, or author adjustment available) | 0.0% (0.0-0.1%)                                  |
| <b>Pakistan</b>                                              |                          |                                                                                                                                                                                                                                                      |                  |                      |             |                     |            |                 |                                 |                                                      |                                                                                                                                             |                                                                                      |                                                  |
| Nisar (Aga Khan University) <sup>556</sup>                   | 2020-08-17 to 2020-08-22 | Sindh   Karachi                                                                                                                                                                                                                                      | Sublocal         | Moderate             | 500         | Mean 27.1 (SD 17.7) | 57.8       | Probability     | Household and community samples | 21.5% (15.6-28.0%)                                   | Roche   Elecsys Anti-SARS-Cov2                                                                                                              | 100.0%, 99.8% (Used author-adjusted estimate)                                        | 21.5% (18.0-25.2%)                               |

| Article Author (Study Organization)                                                        | Sampling Dates (YMD)     | Location        | Geographic Scope | Overall Risk of Bias | Sample Size | Age                                    | Female (%) | Sampling method | Sample frame                    | Uncorrected Seroprevalence (95% Confidence Interval) | Test Manufacturers   Names   Isotypes                                  | Test Sens, Spec (Source)                          | Corrected Seroprevalence (95% Credible Interval) |
|--------------------------------------------------------------------------------------------|--------------------------|-----------------|------------------|----------------------|-------------|----------------------------------------|------------|-----------------|---------------------------------|------------------------------------------------------|------------------------------------------------------------------------|---------------------------------------------------|--------------------------------------------------|
|                                                                                            |                          |                 |                  |                      |             |                                        |            |                 |                                 |                                                      | Immunoassay   IgG, IgM                                                 |                                                   |                                                  |
| Nisar (Aga Khan University) <sup>556</sup>                                                 | 2020-08-17 to 2020-08-22 | Sindh   Karachi | Sublocal         | Moderate             | 501         | Mean 26 (SD 16.7)                      | 58.9       | Probability     | Household and community samples | 12.8% (8.3-17.7%)                                    | Roche   Elecsys Anti-SARS-Cov2 Immunoassay   IgG, IgM                  | 100.0%, 99.8% (Used author-adjusted estimate)     | 12.8% (10.1-15.9%)                               |
| Younas (National Institute of Blood Diseases & Bone Marrow Transplantation) <sup>558</sup> | 2020-05-15 to 2020-07-15 | Sindh   Karachi | Local            | High                 | 370         | Mean 30.6 (SD 6.3)                     | 0.0        | Non-probability | Blood donors                    | 34.6%                                                | Roche Diagnostics   Elecsys Anti-SARS-Cov2 Immunoassay   IgG, IgA, IgM | 0.6%, 1.0% (FINDDx / MUHC independent evaluation) | -                                                |
| Nisar (Aga Khan University) <sup>556</sup>                                                 | 2020-06-25 to 2020-07-11 | Sindh   Karachi | Sublocal         | Moderate             | 504         | Mean 24.3 (SD 16.7)                    | 60.5       | Probability     | Household and community samples | 8.7% (5.1-13.1%)                                     | Roche   Elecsys Anti-SARS-Cov2 Immunoassay   IgG, IgM                  | 100.0%, 99.8% (Used author-adjusted estimate)     | 8.7% (6.3-11.2%)                                 |
| Nisar (Aga Khan University) <sup>556</sup>                                                 | 2020-06-25 to 2020-07-11 | Sindh   Karachi | Sublocal         | Moderate             | 500         | Mean 25.9 (SD 16.7)                    | 55.0       | Probability     | Household and community samples | 15.1% (9.4-21.7%)                                    | Roche   Elecsys Anti-SARS-Cov2 Immunoassay   IgG, IgM                  | 100.0%, 99.8% (Used author-adjusted estimate)     | 15.1% (12.1-18.3%)                               |
| Nisar (Aga Khan University) <sup>556</sup>                                                 | 2020-04-15 to 2020-04-25 | Sindh   Karachi | Sublocal         | Moderate             | 500         | Mean 28.5 (SD 17.9)                    | 58.6       | Probability     | Household and community samples | 0.2% (0.0-0.7%)                                      | Roche   Elecsys Anti-SARS-Cov2 Immunoassay   IgG, IgM                  | 100.0%, 99.8% (Used author-adjusted estimate)     | 0.2% (0.0-0.9%)                                  |
| Nisar (Aga Khan University) <sup>556</sup>                                                 | 2020-04-15 to 2020-04-25 | Sindh   Karachi | Sublocal         | Moderate             | 500         | Mean 26.2 (SD 17.9)                    | 48.8       | Probability     | Household and community samples | 0.4% (0.0-1.3%)                                      | Roche   Elecsys Anti-SARS-Cov2 Immunoassay   IgG, IgM                  | 100.0%, 99.8% (Used author-adjusted estimate)     | 0.4% (0.1-1.3%)                                  |
| <b>Southeast Asia, East Asia, and Oceania</b>                                              |                          |                 |                  |                      |             |                                        |            |                 |                                 |                                                      |                                                                        |                                                   |                                                  |
| <b>China</b>                                                                               |                          |                 |                  |                      |             |                                        |            |                 |                                 |                                                      |                                                                        |                                                   |                                                  |
| Wang (Capital Medical University) <sup>563</sup>                                           | 2020-01-01 to 2020-08-31 | Beijing         | Sublocal         | Moderate             | 19797       | <1 (n = 2461) ; 1-<3 (n = 4383) ; 3-<6 | 54.4       | Non-probability | Residual sera                   | 0.1%                                                 | Beijing Innovita Biological Technology                                 | 0.5%, 1.0% (FINDDx / MUHC)                        | -                                                |

| Article Author (Study Organization)                                | Sampling Dates (YMD)     | Location      | Geographic Scope | Overall Risk of Bias | Sample Size | Age                          | Female (%) | Sampling method | Sample frame                    | Uncorrected Seroprevalence (95% Confidence Interval) | Test Manufacturers   Names   Isotypes                                                                                                     | Test Sens, Spec (Source)                                | Corrected Seroprevalence (95% Credible Interval) |
|--------------------------------------------------------------------|--------------------------|---------------|------------------|----------------------|-------------|------------------------------|------------|-----------------|---------------------------------|------------------------------------------------------|-------------------------------------------------------------------------------------------------------------------------------------------|---------------------------------------------------------|--------------------------------------------------|
|                                                                    |                          |               |                  |                      |             | (n=4334) ; >= 6 (n = 8619)   |            |                 |                                 |                                                      | Innovita 2019-nCoV Ab Test (Colloidal Gold)   IgG                                                                                         | independent evaluation)                                 |                                                  |
| He (Renmin Hospital of Wuhan University) <sup>565</sup>            | 2020-05-15 to 2020-05-29 | Hubei   Wuhan | Local            | Unclear              | 4454        | Median 36.89 (SD 10.811)     | 50.2       | Non-probability | Household and community samples | 2.9%                                                 | Livzon Diagnostics Inc.   Diagnostic Kit for IgM/IgG Antibody   IgG                                                                       | 0.5%, 0.6% (FINDDx / MUHC independent evaluation)       | -                                                |
| Liu (Huazhong University of Science and Technology) <sup>566</sup> | 2020-03-27 to 2020-05-26 | Hubei   Wuhan | Local            | High                 | 35040       | Median 36 (IQR 30-45)        | 50.7       | Non-probability | Household and community samples | 3.9% (3.7-4.1%)                                      | China; Bioscience; Tianjin   MCLIA kits   IgG, IgM                                                                                        | 0.6%, 1.0% (FINDDx / MUHC independent evaluation)       | -                                                |
| Pan (Wuhan University) <sup>567</sup>                              | 2020-05-15 to 2020-05-26 | Hubei   Wuhan | Local            | Moderate             | 61437       | Median 48 (IQR 32-64)        | 51.1       | Probability     | Household and community samples | 2.4% (2.3-2.5%)                                      | Ltd; Nanjing Vazyme Medical technology Co.   a 2019-nCoV IgG/IgM detection kit (catalogue number: C6603C; Colloidal Gold-Based   IgG, IgM | 91.5%, 97.0% (Test developer / manufacturer evaluation) | 0.6% (0.0-1.7%)                                  |
| Chang (Beijing Hospital) <sup>570</sup>                            | 2020-01-15 to 2020-04-30 | Hubei   Wuhan | Local            | High                 | 17794       | Median 33 (IQR 19-47)        | 37.7       | Non-probability | Blood donors                    | 2.3% (2.1-2.5%)                                      | Wantai Biological Pharmacy Enterprise   Wantai SARS CoV-2 Total Antibody ELISA   IgG, IgA, IgM                                            | 0.9%, 1.0% (FINDDx / MUHC independent evaluation)       | -                                                |
| Liu (Zhongnan Hospital of Wuhan University) <sup>571</sup>         | 2020-02-29 to 2020-04-29 | Hubei   Wuhan | Local            | Moderate             | 19555       | Mean 41.6 (95% CI 41.4-41.8) | 50.2       | Non-probability | Household and community samples | 4.6% (4.3-4.9%)                                      | YHLO   SARS-CoV-2 IgM/IgG CLIA kits   IgG                                                                                                 | 0.7%, 1.0% (FINDDx / MUHC independent evaluation)       | -                                                |
| Liu (Zhongnan Hospital of)                                         | 2020-02-29 to 2020-04-29 | Hubei   Wuhan | Local            | Moderate             | 1616        | Mean 53.3 (95% CI 52.4-54.2) | 56.2       | Non-probability | Residual sera                   | 1.0% (0.5-1.5%)                                      | YHLO   SARS-CoV-2                                                                                                                         | 0.7%, 1.0% (FINDDx / MUHC                               | -                                                |

| Article Author (Study Organization)                                     | Sampling Dates (YMD)     | Location              | Geographic Scope | Overall Risk of Bias | Sample Size | Age                        | Female (%) | Sampling method | Sample frame                    | Uncorrected Seroprevalence (95% Confidence Interval) | Test Manufacturers   Names   Isotypes                                                                                                                      | Test Sens, Spec (Source)                                                             | Corrected Seroprevalence (95% Credible Interval) |
|-------------------------------------------------------------------------|--------------------------|-----------------------|------------------|----------------------|-------------|----------------------------|------------|-----------------|---------------------------------|------------------------------------------------------|------------------------------------------------------------------------------------------------------------------------------------------------------------|--------------------------------------------------------------------------------------|--------------------------------------------------|
| Wuhan University) <sup>571</sup>                                        |                          |                       |                  |                      |             |                            |            |                 |                                 |                                                      | IgM/IgG CLIA kits   IgG                                                                                                                                    | independent evaluation)                                                              |                                                  |
| Ling (Chinese Center for Disease Control and Prevention) <sup>573</sup> | 2020-03-25 to 2020-04-28 | Hubei   Wuhan         | Local            | Moderate             | 18712       | Median 40 (Range 4-81)     | 39.1       | Non-probability | Household and community samples | 3.3% (3.0-3.5%)                                      | Innovita   2019-nCoV Ab Test (Colloidal Gold)   IgG, IgM                                                                                                   | 0.6%, 1.0% (FINDDx / MUHC independent evaluation)                                    | -                                                |
| Wang (Peking University) <sup>576</sup>                                 | 2020-04-15 to 2020-04-18 | Hebei   Beijing       | Local            | Moderate             | 2184        | Mean 42.3 (SD 19.5)        | 54.3       | Probability     | Household and community samples | 0.2%                                                 | Innovita Biological Technology Co Ltd; Wondfo Biotech Co.   WONFDO SARS-CoV-2 Antibody Test, Tangshan Colloidal Gold Immunochromatography Assay   IgG, IgM | 66.0%, 96.6% (Used Bastos SR/MA data; no sens, spec, or author adjustment available) | 0.1% (0.0-0.2%)                                  |
| Wu (Wuhan University) <sup>577</sup>                                    | 2020-04-03 to 2020-04-15 | Hubei   Wuhan         | Sublocal         | High                 | 381         | NR                         | NR         | Non-probability | Residual sera                   | 10.5%                                                | Innovita Biological Technology Co. Ltd   2019-nCoV Ab Test   IgG, IgM                                                                                      | 0.6%, 1.0% (FINDDx / MUHC independent evaluation)                                    | -                                                |
| Xu (Institute of Blood Transfusion) <sup>579</sup>                      | 2020-03-23 to 2020-04-02 | Guangdong   Guangzhou | Local            | High                 | 2199        | Median 34 (Range 18 to 59) | 32.3       | Probability     | Blood donors                    | 0.3%                                                 | Lizhu Diagnostics; Wantai Biological Pharmacy Enterprise   Wantai SARS CoV-2 Total Antibody ELISA   IgG, IgA                                               | 75.6%, 97.6% (Used Bastos SR/MA data; no sens, spec, or author adjustment available) | 0.1% (0.0-0.2%)                                  |
| To (Queen Mary Hospital) <sup>587</sup>                                 | 2020-03-04 to 2020-03-17 | Hubei                 | Regional         | Moderate             | 452         | Median 41 (NR)             | 58.6       | Non-probability | Household and community samples | 2.9%                                                 | Author-designed   NR   IgG                                                                                                                                 | 73.3%, 100.0% (Test developer / manufacturer evaluation)                             | 3.5% (0.6-6.5%)                                  |
| Chang (Beijing Hospital) <sup>570</sup>                                 | 2020-02-02 to 2020-03-15 | Guangdong   Shenzhen  | Local            | High                 | 6810        | Median 36 (IQR 19-53)      | 35.0       | Non-probability | Blood donors                    | 0.0% (0.0-0.1%)                                      | Wantai Biological Pharmacy                                                                                                                                 | 0.9%, 1.0% (FINDDx / MUHC)                                                           | -                                                |



| Article Author (Study Organization)                                      | Sampling Dates (YMD)     | Location             | Geographic Scope | Overall Risk of Bias | Sample Size | Age                     | Female (%) | Sampling method | Sample frame                    | Uncorrected Seroprevalence (95% Confidence Interval) | Test Manufacturers   Names   Isotypes                                                          | Test Sens, Spec (Source)                                                             | Corrected Seroprevalence (95% Credible Interval) |
|--------------------------------------------------------------------------|--------------------------|----------------------|------------------|----------------------|-------------|-------------------------|------------|-----------------|---------------------------------|------------------------------------------------------|------------------------------------------------------------------------------------------------|--------------------------------------------------------------------------------------|--------------------------------------------------|
|                                                                          |                          |                      |                  |                      |             |                         |            |                 |                                 |                                                      | Enterprise   Wantai SARS CoV-2 Total Antibody ELISA   IgG, IgA, IgM                            | independent evaluation)                                                              |                                                  |
| Chang (Beijing Hospital) <sup>570</sup>                                  | 2020-01-23 to 2020-03-15 | Hebei   Shijiazhuang | Local            | High                 | 13540       | Median 40 (IQR 33-48)   | 29.5       | Non-probability | Blood donors                    | 0.0% (0.0-0.0%)                                      | Wantai Biological Pharmacy Enterprise   Wantai SARS CoV-2 Total Antibody ELISA   IgG, IgA, IgM | 0.9%, 1.0% (FINDDx / MUHC independent evaluation)                                    | -                                                |
| Zhang (Shengjing Hospital of China Medical University) <sup>590</sup>    | 2020-01-21 to 2020-02-16 | Liaoning   Shenyang  | Regional         | High                 | 225         | Median 35 (Range 1-86)  | 71.1       | Non-probability | Residual sera                   | 0.4%                                                 | Shenzhen Yahuilong Biotechnology Co.   Chemiluminescence Detection Kit   IgG                   | 0.9%, 1.0% (FINDDx / MUHC independent evaluation)                                    | -                                                |
| Zhang (Shengjing Hospital of China Medical University) <sup>590</sup>    | 2020-01-21 to 2020-02-16 | Liaoning   Shenyang  | Regional         | High                 | 222         | Median 50 (Range 27-85) | 72.1       | Non-probability | Residual sera                   | 0.9%                                                 | Shenzhen Yahuilong Biotechnology Co.   Chemiluminescence Detection Kit   IgG                   | 0.9%, 1.0% (FINDDx / MUHC independent evaluation)                                    | -                                                |
| To (Queen Mary Hospital) <sup>587</sup>                                  | 2020-02-01 to 2020-02-13 | Hong Kong            | Regional         | High                 | 233         | NR                      | NR         | Non-probability | Residual sera                   | 0.4% (0.0-2.4%)                                      | Author-designed   NR   IgG                                                                     | 73.3%, 100.0% (Test developer / manufacturer evaluation)                             | 0.8% (0.0-2.6%)                                  |
| To (Queen Mary Hospital) <sup>587</sup>                                  | 2020-01-01 to 2020-01-31 | Hong Kong            | Regional         | High                 | 580         | NR                      | NR         | Non-probability | Residual sera                   | 2.6% (1.5-4.2%)                                      | Author-designed   NR   IgG                                                                     | 73.3%, 100.0% (Test developer / manufacturer evaluation)                             | 3.2% (0.8-5.7%)                                  |
| Hallowell (US Centers for Disease Control and Prevention) <sup>591</sup> | 2020-01-28 to 2020-01-28 | Hubei   Wuhan        | Sublocal         | High                 | 186         | Median 42.0 (NR)        | 47.8       | Non-probability | Household and community samples | 0.5%                                                 | SeraCare Life Sciences   HRP-conjugated anti human IgM/IgA/IgG   IgG, IgA, IgM                 | 75.6%, 97.6% (Used Bastos SR/MA data; no sens, spec, or author adjustment available) | 0.6% (0.0-2.4%)                                  |

| Article Author (Study Organization)                                            | Sampling Dates (YMD)     | Location                | Geographic Scope | Overall Risk of Bias | Sample Size | Age                                                                      | Female (%) | Sampling method | Sample frame                    | Uncorrected Seroprevalence (95% Confidence Interval) | Test Manufacturers   Names   Isotypes                                                                                         | Test Sens, Spec (Source)                                                             | Corrected Seroprevalence (95% Credible Interval) |
|--------------------------------------------------------------------------------|--------------------------|-------------------------|------------------|----------------------|-------------|--------------------------------------------------------------------------|------------|-----------------|---------------------------------|------------------------------------------------------|-------------------------------------------------------------------------------------------------------------------------------|--------------------------------------------------------------------------------------|--------------------------------------------------|
| <b>Malaysia</b>                                                                |                          |                         |                  |                      |             |                                                                          |            |                 |                                 |                                                      |                                                                                                                               |                                                                                      |                                                  |
| Sam (University Malaya) <sup>592</sup>                                         | 2020-01-29 to 2020-06-06 | Selangor   Kuala Lumpur | Regional         | High                 | 588         | NR                                                                       | 62.6       | Non-probability | Residual sera                   | 0.4% (0.0-0.9%)                                      | Author-designed   N/A - Author-designed   IgG                                                                                 | 97.0%, 100.0% (Test developer / manufacturer evaluation)                             | 0.4% (0.0-1.0%)                                  |
| <b>Sub-Saharan Africa</b>                                                      |                          |                         |                  |                      |             |                                                                          |            |                 |                                 |                                                      |                                                                                                                               |                                                                                      |                                                  |
| <b>Congo</b>                                                                   |                          |                         |                  |                      |             |                                                                          |            |                 |                                 |                                                      |                                                                                                                               |                                                                                      |                                                  |
| Batchi-Bouyou (Fondation Congolaise pour la Recherche Médicale) <sup>596</sup> | 2020-04-01 to 2020-07-31 | Brazzaville             | Local            | High                 | 754         | Mean 36.7 (SD 13.07)                                                     | 38.6       | Non-probability | Household and community samples | 19.7%                                                | Wuhan UNniscience Biotechnology; Salofa Oy manufacturer; Finland   UNsciences COVID-19 IgG/IgM rapid test, Sienna™   IgG, IgM | 66.0%, 96.6% (Used Bastos SR/MA data; no sens, spec, or author adjustment available) | 26.0% (21.3-30.8%)                               |
| <b>Ethiopia</b>                                                                |                          |                         |                  |                      |             |                                                                          |            |                 |                                 |                                                      |                                                                                                                               |                                                                                      |                                                  |
| Kempen (Kuwait University) <sup>597</sup>                                      | 2020-05-18 to 2020-05-21 | Addis Ababa             | Local            | High                 | 99          | Mean 37.8 (SARS-CoV-2 IgG negative), 33.3 (SARS-CoV-2 IgG positive) (NR) | 55.6       | Non-probability | Residual sera                   | 3.0% (0.6-8.6%)                                      | Abbott   Abbott IgG Architect   IgG                                                                                           | 0.4%, 1.0% (FINDDx / MUHC independent evaluation)                                    | -                                                |
| Alemu (Ministry of Health, Ethiopia) <sup>598</sup>                            | 2020-04-23 to 2020-04-28 | Addis Ababa             | Local            | Moderate             | 301         | Median 30 (SD 10.9)                                                      | 37.5       | Probability     | Household and community samples | 8.8% (5.5-11.6%)                                     | China; Zhejiang Orient Gene Biotech Co Ltd; Zhejiang; Huzhou   Immunolateral flow immunoassay kit   IgG, IgM                  | 87.9%, 100.0% (Used author-adjusted estimate)                                        | 8.8% (5.9-12.2%)                                 |
| <b>Keyna</b>                                                                   |                          |                         |                  |                      |             |                                                                          |            |                 |                                 |                                                      |                                                                                                                               |                                                                                      |                                                  |
| Adetifa (KEMRI-Wellcome)                                                       | 2020-04-30 to 2020-09-30 |                         | National         | Low                  | 9922        | 15-24 n = 2,763 25-34 n = 3,902 35-44                                    | 19.2       | Non-probability | Blood donors                    | 9.4% (8.8-9.9%)                                      | N/A - in-house   N/A - in-house   IgG                                                                                         | 92.7%, 99.0% (Author-reported)                                                       | 9.0% (8.1-10.0%)                                 |

| Article Author (Study Organization)                           | Sampling Dates (YMD)     | Location    | Geographic Scope | Overall Risk of Bias | Sample Size | Age                                               | Female (%) | Sampling method | Sample frame                    | Uncorrected Seroprevalence (95% Confidence Interval) | Test Manufacturers   Isotypes                                              | Test Sens, Spec (Source)                                | Corrected Seroprevalence (95% Credible Interval) |
|---------------------------------------------------------------|--------------------------|-------------|------------------|----------------------|-------------|---------------------------------------------------|------------|-----------------|---------------------------------|------------------------------------------------------|----------------------------------------------------------------------------|---------------------------------------------------------|--------------------------------------------------|
| Trust Research Programme) <sup>599</sup>                      |                          |             |                  |                      |             | n = 2,261 45-54 n = 794 55-64 n = 202             |            |                 |                                 |                                                      |                                                                            | independent evaluation)                                 |                                                  |
| <b>Nigeria</b>                                                |                          |             |                  |                      |             |                                                   |            |                 |                                 |                                                      |                                                                            |                                                         |                                                  |
| Majiya (Ibrahim Badamasi Babangida University) <sup>601</sup> | 2020-06-26 to 2020-06-30 | Niger State | Regional         | Moderate             | 185         | NR                                                | 44.3       | Probability     | Household and community samples | 25.4%                                                | Cambridge Network   COVID-19 IgG and IgM Rapid Test   IgG                  | 100.0%, 100.0% (Author-reported independent evaluation) | 19.5% (0.5-31.9%)                                |
| <b>South Africa</b>                                           |                          |             |                  |                      |             |                                                   |            |                 |                                 |                                                      |                                                                            |                                                         |                                                  |
| Hsiao (University of Cape Town) <sup>604</sup>                | 2020-06-15 to 2020-08-07 | Cape Town   | Local            | High                 | 2791        | < 20 (n = 151) ; 20-50 (n = 2349) ; >50 (n = 291) | 80.3       | Non-probability | Residual sera                   | 40.2% (38.4-42.1%)                                   | Roche Diagnostics   Elecsys <sup>TM</sup> anti-SARS-CoV-2 assay   IgG, IgM | 0.8%, 1.0% (FINDDx / MUHC independent evaluation)       | 59.8% (57.9-61.8%)                               |

**S2 Table. Characteristics and primary results of studies reporting population-specific seroprevalence estimates**

| Article Author (Study Organization)                                    | Sampling Dates (YMD)     | Location          | Geographic Scope | Overall Risk of Bias | Sample Size | Age                     | Female (%) | Sampling method | Sample frame                                 | Uncorrected Seroprevalence (95% Confidence Interval) | Test Manufacturers   Names   Isotypes                                                                                          | Test Sens, Spec (Source)                                                             | Corrected Seroprevalence (95% Credible Interval) |
|------------------------------------------------------------------------|--------------------------|-------------------|------------------|----------------------|-------------|-------------------------|------------|-----------------|----------------------------------------------|------------------------------------------------------|--------------------------------------------------------------------------------------------------------------------------------|--------------------------------------------------------------------------------------|--------------------------------------------------|
| <b>Central Europe, Eastern Europe, and Central Asia</b>                |                          |                   |                  |                      |             |                         |            |                 |                                              |                                                      |                                                                                                                                |                                                                                      |                                                  |
| <b>Armenia</b>                                                         |                          |                   |                  |                      |             |                         |            |                 |                                              |                                                      |                                                                                                                                |                                                                                      |                                                  |
| Grigoryan (Ministry of Health of the Republic of Armenia) <sup>1</sup> | 2020-06-29               | Yerevan   Yerevan | Local            | High                 | 380         | NR                      | NR         | Non-probability | Health care workers and caregivers           | 16.1%                                                | NR   NR   NR                                                                                                                   | 100.0%, 99.8% (Test developer / manufacturer evaluation)                             | 14.4% (9.4-19.3%)                                |
| <b>Croatia</b>                                                         |                          |                   |                  |                      |             |                         |            |                 |                                              |                                                      |                                                                                                                                |                                                                                      |                                                  |
| Vince (Croatian Football Federation) <sup>3</sup>                      | 2020-05-29 to 2020-07-31 |                   | Sublocal         | Moderate             | 305         | Mean 28.5 (SD 9.1)      | 0.0        | Non-probability | Non-essential workers and unemployed persons | 20.0%                                                | Euroimmun Medizinische Labordiagnostika AG   Anti-SARS-CoV-2 IgA, Anti-SARS-CoV-2 IgG S and Anti-SARS-CoV-2 IgG NCP   IgG, IgA | 75.6%, 97.6% (Used Bastos SR/MA data; no sens, spec, or author adjustment available) | 24.1% (18.3-30.8%)                               |
| Lapić (Zagreb University) <sup>4</sup>                                 | 2020-05-01 to 2020-05-31 | Zagreb            | Sublocal         | Moderate             | 1678        | Median 43 (NR)          | 78.2       | Non-probability | Health care workers and caregivers           | 0.6%                                                 | Abbott Laboratories   Abbott SARS-CoV-2 IgG assay   IgG                                                                        | 0.4%, 1.0% (FINDDx / MUHC independent evaluation)                                    | -                                                |
| Vilibic-Cavlek (University of Zagreb) <sup>5</sup>                     | 2020-04-25 to 2020-05-24 |                   | National         | High                 | 592         | 20-65                   | 74.3       | Non-probability | Health care workers and caregivers           | 2.7%                                                 | Vircell Spain S.L.U   NR   IgG                                                                                                 | 0.7%, 1.0% (FINDDx / MUHC independent evaluation)                                    | -                                                |
| Jerkovic (University of Split) <sup>6</sup>                            | 2020-04-23 to 2020-04-28 |                   | Local            | High                 | 1494        | Median 46 (Range 19-79) | 11.9       | Non-probability | Essential non-healthcare workers             | 1.3% (0.8-2.0%)                                      | AMP Diagnostics   AMP Rapid Test SARS-CoV-2 IgG/IgM   IgG, IgM                                                                 | 91.8%, 96.4% (Test developer / manufacturer evaluation)                              | 0.3% (0.0-1.1%)                                  |
| <b>Czechia</b>                                                         |                          |                   |                  |                      |             |                         |            |                 |                                              |                                                      |                                                                                                                                |                                                                                      |                                                  |

| Article Author (Study Organization)                                      | Sampling Dates (YMD)     | Location                                                         | Geographic Scope | Overall Risk of Bias | Sample Size | Age                   | Female (%) | Sampling method | Sample frame                                   | Uncorrected Seroprevalence (95% Confidence Interval) | Test Manufacturers   Names   Isotypes                                                                                          | Test Sens, Spec (Source)                                 | Corrected Seroprevalence (95% Credible Interval) |
|--------------------------------------------------------------------------|--------------------------|------------------------------------------------------------------|------------------|----------------------|-------------|-----------------------|------------|-----------------|------------------------------------------------|------------------------------------------------------|--------------------------------------------------------------------------------------------------------------------------------|----------------------------------------------------------|--------------------------------------------------|
| Malickova (Clinical and Research Center for Inflammatory Bowel Disease)* | Until 2020-04-15         | Central Bohemian   Prague                                        | Sublocal         | Unclear              | 92          | Median 45 (IQR 38-57) | 71.7       | Non-probability | Health care workers and caregivers             | 2.2%                                                 | EUROIMMUN   Euroimmun Anti-SARS-CoV-2 ELISA IgG   IgG                                                                          | 0.8%, 1.0% (FINDDx / MUHC independent evaluation)        | -                                                |
| <b>Estonia</b>                                                           |                          |                                                                  |                  |                      |             |                       |            |                 |                                                |                                                      |                                                                                                                                |                                                          |                                                  |
| Veerus (University of Tartu) <sup>10</sup>                               | 2020-05-04 to 2020-06-10 |                                                                  | National         | High                 | 433         | Mean 31 (SD 5.89)     | 100.0      | Non-probability | Pregnant or parturient women                   | 0.5%                                                 | Abbott   SARS-CoV-2 IgG Architect   IgG                                                                                        | 0.4%, 1.0% (FINDDx / MUHC independent evaluation)        | -                                                |
| <b>Poland</b>                                                            |                          |                                                                  |                  |                      |             |                       |            |                 |                                                |                                                      |                                                                                                                                |                                                          |                                                  |
| Ciechanowicz (Central Clinical Hospital MSWiA) <sup>13</sup>             | 2020-04-01 to 2020-10-31 | Warsaw                                                           | Sublocal         | High                 | 61          | Mean 46 (SD 14)       | 34.4       | Non-probability | Patients seeking care for non-COVID-19 reasons | 16.4%                                                | Vircell Microbiologist; Spain:: Granada   Vircell anti-SARS-CoV-2 IgM, IgA and IgG ELISA; ref. MA1032 and G103   IgG, IgA, IgM | 100.0%, 95.0% (Test developer / manufacturer evaluation) | 10.6% (1.0-21.1%)                                |
| Kasztelewicz (The Children's Memorial Health Institute) <sup>14</sup>    | 2020-07-01 to 2020-08-09 | Masovia   Warsaw                                                 | Sublocal         | Moderate             | 1879        | Median 48 (IQR 38-56) | 85.8       | Non-probability | Health care workers and caregivers             | 0.9%                                                 | Abbott Laboratories   Abbott SARS-CoV-2 IgG assay   IgG                                                                        | 0.4%, 1.0% (FINDDx / MUHC independent evaluation)        | -                                                |
| Gujski (Medical University of Warsaw) <sup>15</sup>                      | 2020-06-22 to 2020-07-08 | Mazowieckie Province                                             | Regional         | Moderate             | 5082        | Mean 39.6 (SD 9)      | 33.5       | Probability     | Essential non-healthcare workers               | 4.3% (3.7-4.9%)                                      | Vircell S.L   COVID-19 ELISA IgG Kit   IgG                                                                                     | 0.7%, 1.0% (FINDDx / MUHC independent evaluation)        | -                                                |
| <b>Romania</b>                                                           |                          |                                                                  |                  |                      |             |                       |            |                 |                                                |                                                      |                                                                                                                                |                                                          |                                                  |
| MedLife (MedLife) <sup>16</sup>                                          | 2020-03-24 to 2020-04-21 | Nord-Vest, Bucuresti-Ilfov, Sud-Vest Oltenia, Vest, Sud-Mutenia, | National         | Unclear              | 371         | NR                    | NR         | Non-probability | Health care workers and caregivers             | 3.0%                                                 | Maglumi; Abbott; YHLO   Multiple tests used in combination   IgG, IgM                                                          | No data                                                  | -                                                |

| Article Author (Study Organization)                               | Sampling Dates (YMD)     | Location                                                                                                                           | Geographic Scope | Overall Risk of Bias | Sample Size | Age                 | Female (%) | Sampling method | Sample frame                       | Uncorrected Seroprevalence (95% Confidence Interval) | Test Manufacturers   Names   Isotypes                                                        | Test Sens, Spec (Source)                                                             | Corrected Seroprevalence (95% Credible Interval) |
|-------------------------------------------------------------------|--------------------------|------------------------------------------------------------------------------------------------------------------------------------|------------------|----------------------|-------------|---------------------|------------|-----------------|------------------------------------|------------------------------------------------------|----------------------------------------------------------------------------------------------|--------------------------------------------------------------------------------------|--------------------------------------------------|
|                                                                   |                          | Sud-Est, Centru, Nord-Est   Brasov, Sibiu, Timisoara, Pitesti, Targoviste, Arad, Galati, Braila, Ploiesti, Bucharest, Piatra Neamt |                  |                      |             |                     |            |                 |                                    |                                                      |                                                                                              |                                                                                      |                                                  |
| <b>Russian Federation</b>                                         |                          |                                                                                                                                    |                  |                      |             |                     |            |                 |                                    |                                                      |                                                                                              |                                                                                      |                                                  |
| Krechetova (Ministry of Health of Russia) <sup>24</sup>           | 2020-04-15 to 2020-06-15 | Moscow                                                                                                                             | Sublocal         | Unclear              | 1589        | NR                  | NR         | Non-probability | Health care workers and caregivers | 8.9%                                                 | "NMITs Hematology" Ministry of Health of the Russian Federation   SARS-CoV-2-IgG-ELISA   IgG | 75.6%, 97.6% (Used Bastos SR/MA data; no sens, spec, or author adjustment available) | 8.8% (6.4-11.1%)                                 |
| <b>High Income</b>                                                |                          |                                                                                                                                    |                  |                      |             |                     |            |                 |                                    |                                                      |                                                                                              |                                                                                      |                                                  |
| <b>Argentina</b>                                                  |                          |                                                                                                                                    |                  |                      |             |                     |            |                 |                                    |                                                      |                                                                                              |                                                                                      |                                                  |
| Silva (Instituto Nacional de Epidemiologia) <sup>28</sup>         | 2020-06-03 to 2020-07-06 | Buenos Aires   Buenos Aires                                                                                                        | Sublocal         | Moderate             | 738         | NR                  | NR         | Probability     | Health care workers and caregivers | 0.8% (0.0-8.1%)                                      | CONICET   COVIDAR IgG ELISA, COVIDAR IgM Test   IgG, IgM                                     | 75.6%, 97.6% (Used Bastos SR/MA data; no sens, spec, or author adjustment available) | 0.2% (0.0-0.8%)                                  |
| Figar (Minister of Health, Buenos Aires City) <sup>29</sup>       | 2020-06-10 to 2020-07-01 | Buenos Aires   Buenos Aires                                                                                                        | Sublocal         | High                 | 60          | NR                  | NR         | Non-probability | Persons living in slums            | 36.0%                                                | Laboratio Lemos   COVIDAR IgG ELISA   IgG                                                    | 95.0%, 100.0% (Test developer / manufacturer evaluation)                             | 38.4% (24.2-51.8%)                               |
| Insúa (Hospital General de Niños Pedro de Elizalde) <sup>30</sup> | 2020-06-08 to 2020-06-09 | Province of Buenos Aires   Autonomous City of Buenos Aires                                                                         | Sublocal         | High                 | 116         | Mean 45.6 (SD 13.3) | NR         | Probability     | Health care workers and caregivers | 0.9% (0.1-5.5%)                                      | Snibe (Shenzen New Industries)   MAGLUMI 2019-nCoV IgM and 2019-nCoV IgG   IgG, IgM          | 95.6%, 96.0% (Test developer / manufacturer evaluation)                              | 0.8% (0.0-3.4%)                                  |

| Article Author (Study Organization)                                    | Sampling Dates (YMD)     | Location        | Geographic Scope | Overall Risk of Bias | Sample Size | Age                     | Female (%) | Sampling method | Sample frame                                   | Uncorrected Seroprevalence (95% Confidence Interval) | Test Manufacturers   Names   Isotypes                                                    | Test Sens, Spec (Source)                                                             | Corrected Seroprevalence (95% Credible Interval) |
|------------------------------------------------------------------------|--------------------------|-----------------|------------------|----------------------|-------------|-------------------------|------------|-----------------|------------------------------------------------|------------------------------------------------------|------------------------------------------------------------------------------------------|--------------------------------------------------------------------------------------|--------------------------------------------------|
| <b>Australia</b>                                                       |                          |                 |                  |                      |             |                         |            |                 |                                                |                                                      |                                                                                          |                                                                                      |                                                  |
| Hicks (Australian National University) <sup>31</sup>                   | 2020-05-15 to 2020-06-15 |                 | National         | Unclear              | 2991        | Mean 54 (Range 15-95)   | 51.2       | Non-probability | Patients seeking care for non-COVID-19 reasons | 1.4%                                                 | In House   Dual-antigen IgG ELISA   IgG, IgA, IgM                                        | 100.0%, 98.9% (Test developer / manufacturer evaluation)                             | 0.4% (0.0-1.0%)                                  |
| Macartney (University of Sydney) <sup>32</sup>                         | 2020-01-25 to 2020-04-10 | New South Wales | Regional         | Moderate             | 173         | NR                      | NR         | Non-probability | Contacts of COVID patients                     | 2.3%                                                 | Author-designed   N/A - Author-designed   IgG, IgA, IgM                                  | 91.3%, 98.9% (Test developer / manufacturer evaluation)                              | 1.3% (0.0-3.9%)                                  |
| <b>Austria</b>                                                         |                          |                 |                  |                      |             |                         |            |                 |                                                |                                                      |                                                                                          |                                                                                      |                                                  |
| Fuereder (Medical University of Vienna) <sup>34</sup>                  | 2020-04-01 to 2020-06-04 | Vienna   Vienna | Sublocal         | High                 | 62          | Median 41 (Range 23-59) | 71.0       | Non-probability | Health care workers and caregivers             | 3.2% (0.4-11.2%)                                     | Abbott; Roche   Elecsys Anti-SARS-CoV-2 kit, Abbott Architect SARS-CoV-2 IgG assay   IgG | 97.8%, 97.8% (Used Bastos SR/MA data; no sens, spec, or author adjustment available) | 1.7% (0.0-6.4%)                                  |
| Fuereder (Medical University of Vienna) <sup>34</sup>                  | 2020-03-21 to 2020-06-04 | Vienna   Vienna | Sublocal         | High                 | 84          | Median 61 (NR)          | 48.8       | Non-probability | Patients seeking care for non-COVID-19 reasons | 2.4% (0.3-8.3%)                                      | Abbott; Roche   Elecsys Anti-SARS-CoV-2 kit, Abbott Architect SARS-CoV-2 IgG assay   IgG | 97.8%, 97.8% (Used Bastos SR/MA data; no sens, spec, or author adjustment available) | 1.8% (0.0-5.9%)                                  |
| Hackner (Karl Landsteiner University of Health Sciences) <sup>35</sup> | 2020-04-01 to 2020-04-30 |                 | Sublocal         | High                 | 130         | Median 41 (Range 19-64) | 76.9       | Non-probability | Health care workers and caregivers             | 2.3%                                                 | Epitope Diagnostics   NR   IgG, IgM                                                      | 0.8%, 0.9% (FINDDx / MUHC independent evaluation)                                    | -                                                |
| Reiter (Medical University of Vienna) <sup>38</sup>                    | 2020-03-15 to 2020-03-29 | Vienna          | Sublocal         | High                 | 235         | Mean 44.2 (SD 11.4)     | 70.2       | Non-probability | Health care workers and caregivers             | 25.5% (20.4-31.5%)                                   | ImmunoDiagnostics   ImmunoDiagnostics test system IgG IgM   IgG, IgM                     | 75.6%, 97.6% (Used Bastos SR/MA data; no sens, spec, or author adjustment available) | 31.1% (23.9-39.0%)                               |
| Orth-Höller (Innsbruck Clinical)                                       | 2020-03-20 to 2020-03-27 | Tyrol           | Regional         | High                 | 377         | Median 51 (NR)          | 46.7       | Non-probability | Health care workers and caregivers             | 0.3% (0.0-1.5%)                                      | EUROIMMUN   Euroimmun Anti-SARS-                                                         | 0.8%, 1.0% (FINDDx / MUHC)                                                           | -                                                |

| Article Author (Study Organization)                         | Sampling Dates (YMD)     | Location                    | Geographic Scope | Overall Risk of Bias | Sample Size | Age                                                                                                  | Female (%) | Sampling method | Sample frame                                   | Uncorrected Seroprevalence (95% Confidence Interval) | Test Manufacturers   Names   Isotypes                                                                         | Test Sens, Spec (Source)                                | Corrected Seroprevalence (95% Credible Interval) |
|-------------------------------------------------------------|--------------------------|-----------------------------|------------------|----------------------|-------------|------------------------------------------------------------------------------------------------------|------------|-----------------|------------------------------------------------|------------------------------------------------------|---------------------------------------------------------------------------------------------------------------|---------------------------------------------------------|--------------------------------------------------|
| Microbiology Laboratory <sup>39</sup>                       |                          |                             |                  |                      |             |                                                                                                      |            |                 |                                                |                                                      | CoV-2 ELISA IgG   IgG                                                                                         | independent evaluation)                                 |                                                  |
| <b>Belgium</b>                                              |                          |                             |                  |                      |             |                                                                                                      |            |                 |                                                |                                                      |                                                                                                               |                                                         |                                                  |
| Duysburgh (Sciensano) <sup>40</sup>                         | 2020-04-22 to 2020-09-30 |                             | National         | Unclear              | 850         | NR                                                                                                   | NR         | Non-probability | Health care workers and caregivers             | 9.5%                                                 | Euroimmun Medizinische Labordiagnostika   EUROIMMUN -Anti-SARS-CoV-2 ELISA (IgG)   IgG                        | 0.6%, 0.9% (FINDDx / MUHC independent evaluation)       | -                                                |
| Blairon (Iris Hospitals South) <sup>42</sup>                | 2020-05-25 to 2020-06-19 | Brussels   City of Brussels | Local            | High                 | 1485        | Median 47.45 (Males); 43.90 (Females) (Range 46.00–48.84 (Males); 42.80–45.10 (Females))             | 73.1       | Non-probability | Health care workers and caregivers             | 14.6%                                                | DiaSorin   Liaison® SARS- CoV-2 S1/S2 IgG   IgG                                                               | 0.8%, 1.0% (FINDDx / MUHC independent evaluation)       | -                                                |
| Berardis (Cliniques universitaires Saint-Luc) <sup>43</sup> | 2020-04-16 to 2020-05-19 | City of Brussels            | Local            | High                 | 149         | Mean 24.9 (SD 15)                                                                                    | 49.0       | Non-probability | Patients seeking care for non-COVID-19 reasons | 2.7%                                                 | "SNIBE – Shenzhen New Industries Biomedical Engineering Co.; Ltd"   MAGLUMI 2019-nCov IgG/IgM CLIA   IgG, IgM | 95.6%, 96.0% (Test developer / manufacturer evaluation) | 1.2% (0.0-4.1%)                                  |
| Martin (Université Libre de Bruxelles) <sup>44</sup>        | 2020-04-15 to 2020-05-18 | Brussels   City of Brussels | Local            | High                 | 326         | Mean 37 (Range 21-66)                                                                                | 73.3       | Non-probability | Health care workers and caregivers             | 11.0%                                                | EUROIMMUN   Euroimmun Anti-SARS-CoV-2 ELISA IgG   IgG                                                         | 0.4%, 1.0% (FINDDx / MUHC independent evaluation)       | -                                                |
| Steensels (ZiekenhuisOost-Limburg) <sup>45</sup>            | 2020-04-22 to 2020-04-30 | Limburg   Genk              | Sublocal         | High                 | 3056        | Mean 39.5 (staff with antibodies); 41.3 (staff without antibodies) (SD 13.1 (staff with antibodies); | NR         | Non-probability | Health care workers and caregivers             | 6.4% (5.5-7.3%)                                      | Multi-G   COVID-19 IgG/IgM Rapid Test Cassette   IgG                                                          | 0.6%, 1.0% (FINDDx / MUHC independent evaluation)       | -                                                |



| Article Author (Study Organization)                           | Sampling Dates (YMD)     | Location                     | Geographic Scope | Overall Risk of Bias | Sample Size | Age                                                                                                                                              | Female (%) | Sampling method | Sample frame                       | Uncorrected Seroprevalence (95% Confidence Interval) | Test Manufacturers   Names   Isotypes                                                                              | Test Sens, Spec (Source)                              | Corrected Seroprevalence (95% Credible Interval) |
|---------------------------------------------------------------|--------------------------|------------------------------|------------------|----------------------|-------------|--------------------------------------------------------------------------------------------------------------------------------------------------|------------|-----------------|------------------------------------|------------------------------------------------------|--------------------------------------------------------------------------------------------------------------------|-------------------------------------------------------|--------------------------------------------------|
|                                                               |                          |                              |                  |                      |             | 12.4 (staff without antibodies )                                                                                                                 |            |                 |                                    |                                                      |                                                                                                                    |                                                       |                                                  |
| Buntinx (University of Leuven) <sup>46</sup>                  | 2020-04-14 to 2020-04-16 | Limburg   Lanaken            | Sublocal         | High                 | 188         | Mean 86 (NR)                                                                                                                                     | 100.0      | Non-probability | Multiple populations               | 18.6%                                                | SureScreen Diagnostics; UK; Derby   SureScreen Diagnostics Covid-19 IgG/IgM Rapid test cassette   IgG, IgM         | 74.7%, 95.1% (Author-reported independent evaluation) | 17.4% (6.1-27.2%)                                |
| <b>Canada</b>                                                 |                          |                              |                  |                      |             |                                                                                                                                                  |            |                 |                                    |                                                      |                                                                                                                    |                                                       |                                                  |
| Brousseau (Institut National de Sante Publique) <sup>50</sup> | 2020-07-06 to 2020-09-24 | Quebec                       | Regional         | High                 | 2056        | 18-29 ( n = 427) ; 30-39 (n = 643) ; 40-49 (n = 547) ; 50-59 (n = 356) ; 60+ (n = 83)                                                            | 76.1       | Non-probability | Health care workers and caregivers | 11.7%                                                | DiaSorin   LIAISON SARS-CoV-2 S1/S2 IgG   IgG                                                                      | 0.8%, 1.0% (FINDDx / MUHC independent evaluation)     | -                                                |
| Bardai (Shriners Hospital for Children) <sup>52</sup>         | 2020-06-10 to 2020-07-27 | Quebec   Montreal            | Sublocal         | High                 | 199         | Median Patients: 15.6, Accompanying persons: 47.1, Employees 42.5 (IQR Patients 13.4-16.8, accompanying persons 41.4- 50.8, employees 32.5-52.5) | 69.8       | Non-probability | Multiple populations               | 11.0%                                                | Omega Diagnostics   Mologic, Omega Diagnostics   IgG                                                               | 0.9%, 1.0% (FINDDx / MUHC independent evaluation)     | -                                                |
| Majdoubi (BC Children's Hospital) <sup>54</sup>               | 2020-05-17 to 2020-06-19 | British Columbia   Vancouver | Local            | High                 | 276         | Mean 42.4 (SD 11.9)                                                                                                                              | 67.4       | Non-probability | Multiple populations               | 0.6% (0.0-2.7%)                                      | Ortho-Clinical Diagnostics; Meso Scale Diagnostics   VITROS 5600 analyser, 10-plex multiplex assay   IgG, IgA, IgM | 0.0%, 0.0% (Used author-adjusted estimate)            | 0.6% (0.0-1.7%)                                  |

| Article Author (Study Organization)                            | Sampling Dates (YMD)     | Location                               | Geographic Scope | Overall Risk of Bias | Sample Size | Age                                                                | Female (%) | Sampling method | Sample frame                                  | Uncorrected Seroprevalence (95% Confidence Interval) | Test Manufacturers   Names   Isotypes                                                                                                                                     | Test Sens, Spec (Source)                                                             | Corrected Seroprevalence (95% Credible Interval) |
|----------------------------------------------------------------|--------------------------|----------------------------------------|------------------|----------------------|-------------|--------------------------------------------------------------------|------------|-----------------|-----------------------------------------------|------------------------------------------------------|---------------------------------------------------------------------------------------------------------------------------------------------------------------------------|--------------------------------------------------------------------------------------|--------------------------------------------------|
| Vijh (University of British Columbia) <sup>57</sup>            | 2020-05-04 to 2020-05-14 | British Columbia   Vancouver           | Sublocal         | High                 | 291         | Median 86 (residents); 49 (staff) (IQR 15 (residents); 18 (staff)) | 72.2       | Non-probability | Assisted living and long-term care facilities | 39.0%                                                | Abbott; DiaSorin; Ortho Vitros; Siemens   DiaSorin Liaison IgG, Ortho Vitros Total Antibody, Ortho Vitros IgG, Abbott Architect IgG, Siemens Centaur Total Antibody   IgG | No data                                                                              | -                                                |
| <b>Chile</b>                                                   |                          |                                        |                  |                      |             |                                                                    |            |                 |                                               |                                                      |                                                                                                                                                                           |                                                                                      |                                                  |
| Torres (Universidad de Chile) <sup>58</sup>                    | 2020-05-04 to 2020-05-19 | Santiago   Vitacura                    | Sublocal         | High                 | 1009        | Mean 10.8 (SD 4.1)                                                 | 46.0       | Probability     | Students and Daycares                         | 9.9% (8.6-11.5%)                                     | Genrui Biotech   Genrui Biotech IgG/IgM Test Kit (Colloidal Gold)   IgG, IgM                                                                                              | 91.0%, 95.4% (Test developer / manufacturer evaluation)                              | 5.2% (1.3-9.0%)                                  |
| Torres (Universidad de Chile) <sup>58</sup>                    | 2020-05-04 to 2020-05-19 | Santiago   Vitacura                    | Sublocal         | High                 | 235         | Mean 42.8 (SD 10.4)                                                | 73.2       | Probability     | Essential non-healthcare workers              | 16.6% (12.1-21.9%)                                   | Genrui Biotech   Genrui Biotech IgG/IgM Test Kit (Colloidal Gold)   IgG, IgM                                                                                              | 91.0%, 95.4% (Test developer / manufacturer evaluation)                              | 13.3% (7.1-20.0%)                                |
| <b>Denmark</b>                                                 |                          |                                        |                  |                      |             |                                                                    |            |                 |                                               |                                                      |                                                                                                                                                                           |                                                                                      |                                                  |
| Laursen (Copenhagen University Hospital) <sup>59</sup>         | 2020-06-22 to 2020-08-10 |                                        | National         | High                 | 2024        | <40 (n=542); 40-60 (n=1045); 60+ (n=437)                           | 24.5       | Non-probability | Health care workers and caregivers            | 2.8%                                                 | Zuhai; China; Guangzhou Wondfo Biotech; Livson Diagnostics; Gunangdong   Livzon lateral flow test, WONDFO lateral flow   IgG, IgM                                         | 66.0%, 96.6% (Used Bastos SR/MA data; no sens, spec, or author adjustment available) | 0.3% (0.0-1.1%)                                  |
| Egerup (Copenhagen University Hospital Hvidovre) <sup>60</sup> | 2020-04-04 to 2020-07-03 | Capital Region of Denmark   Copenhagen | Sublocal         | High                 | 1206        | Median 31.5 (IQR 28.6-34.7 (antibody positive);                    | 47.5       | Non-probability | Perinatal                                     | 1.4%                                                 | Shenzhen Yhlo Biotech   iFlash 1800 and SARS-CoV-2                                                                                                                        | 94.0%, 99.3% (Test developer / manufacturer evaluation)                              | 0.6% (0.0-1.6%)                                  |

| Article Author (Study Organization)                            | Sampling Dates (YMD)     | Location                               | Geographic Scope | Overall Risk of Bias | Sample Size | Age                                                                                                                      | Female (%) | Sampling method | Sample frame                       | Uncorrected Seroprevalence (95% Confidence Interval) | Test Manufacturers   Names   Isotypes                                                                                                       | Test Sens, Spec (Source)                                        | Corrected Seroprevalence (95% Credible Interval) |
|----------------------------------------------------------------|--------------------------|----------------------------------------|------------------|----------------------|-------------|--------------------------------------------------------------------------------------------------------------------------|------------|-----------------|------------------------------------|------------------------------------------------------|---------------------------------------------------------------------------------------------------------------------------------------------|-----------------------------------------------------------------|--------------------------------------------------|
|                                                                |                          |                                        |                  |                      |             | 28.2-33.4 (antibody negative)                                                                                            |            |                 |                                    |                                                      | IgM and IgG kits   IgG, IgM                                                                                                                 |                                                                 |                                                  |
| Egerup (Copenhagen University Hospital Hvidovre) <sup>60</sup> | 2020-04-04 to 2020-07-03 | Capital Region of Denmark   Copenhagen | Sublocal         | Moderate             | 1188        | Median 33.4 - without antibodies 32.4 - with antibodies (IQR 30.2-37.2 - without antibodies 30.6-35.8 - with antibodies) | NR         | Non-probability | Hospital visitors                  | 2.7%                                                 | Shenzhen Yhlo Biotech   iFlash 1800 and SARS-CoV-2 IgM and IgG kits   IgG, IgM                                                              | 94.0%, 99.3% (Test developer / manufacturer evaluation)         | 1.5% (0.0-3.0%)                                  |
| Egerup (Copenhagen University Hospital Hvidovre) <sup>60</sup> | 2020-04-04 to 2020-07-03 | Capital Region of Denmark   Copenhagen | Sublocal         | Moderate             | 1313        | Median 31.5 (IQR 28.2-33.4 - Women with antibodies 28.6 - 34.7 - Women without antibodies)                               | 100.0      | Non-probability | Pregnant or parturient women       | 2.1%                                                 | Shenzhen Yhlo Biotech   iFlash 1800 and SARS-CoV-2 IgM and IgG kits   IgG, IgM                                                              | 94.0%, 99.3% (Test developer / manufacturer evaluation)         | 1.0% (0.0-2.3%)                                  |
| Jespersen (Aarhus University Hospital) <sup>61</sup>           | 2020-05-18 to 2020-06-19 | Central Denmark Region                 | Regional         | Moderate             | 17948       | <=29 (n=2032); 30-39 (n=3938); 40-49 (n=4735); 50-59 (n=4666); >=60 (2577)                                               | 85.9       | Non-probability | Health care workers and caregivers | 3.4% (2.4-3.8%)                                      | Wantai Biological Pharmacy Enterprise Co; Beijing; China; Ltd   SARS-CoV-2 total antibody enzyme-linked immunosorbent assay   IgG, IgA, IgM | 96.7%, 99.5% (Used author-adjusted estimate)                    | 3.4% (3.1-3.6%)                                  |
| Storgaard (Aarhus Department of Public Health) <sup>63</sup>   | 2020-06-01 to 2020-06-04 | Central Denmark Region   Aarhus        | Local            | High                 | 129         | Median 53 (Range 42-61)                                                                                                  | 24.0       | Non-probability | Persons experiencing homelessness  | 4.7% (2.1-9.8%)                                      | NR   NR   IgG, IgM                                                                                                                          | 98.9%, 97.6% (Test developer / manufacturer evaluation)         | 2.8% (0.0-7.3%)                                  |
| Freiesleben (Copenhagen University Hospital) <sup>64</sup>     | 2020-04-14 to 2020-05-21 | Copenhagen   Copenhagen                | Sublocal         | High                 | 36          | Mean 32.96 (SD 5.22)                                                                                                     | 100.0      | Non-probability | Pregnant or parturient women       | 0.0%                                                 | YHLO Biotechnology   YHLO's SARS-CoV-2 IgM/IgG kits   IgG, IgM                                                                              | 97.8%, 97.8% (Used Bastos SR/MA data; no sens, spec, or author) | 1.9% (0.0-8.0%)                                  |

| Article Author (Study Organization)                                         | Sampling Dates (YMD)     | Location                  | Geographic Scope | Overall Risk of Bias | Sample Size | Age                   | Female (%) | Sampling method | Sample frame                       | Uncorrected Seroprevalence (95% Confidence Interval) | Test Manufacturers   Names   Isotypes                                                                            | Test Sens, Spec (Source)                                                             | Corrected Seroprevalence (95% Credible Interval) |
|-----------------------------------------------------------------------------|--------------------------|---------------------------|------------------|----------------------|-------------|-----------------------|------------|-----------------|------------------------------------|------------------------------------------------------|------------------------------------------------------------------------------------------------------------------|--------------------------------------------------------------------------------------|--------------------------------------------------|
|                                                                             |                          |                           |                  |                      |             |                       |            |                 |                                    |                                                      |                                                                                                                  | adjustment available)                                                                |                                                  |
| Iversen (University of Copenhagen) <sup>66</sup>                            | 2020-04-15 to 2020-04-22 | Capital Region of Denmark | Regional         | Low                  | 28792       | Mean 44.4 (SD 12.6)   | 78.9       | Probability     | Health care workers and caregivers | 4.4% (4.1-4.7%)                                      | Livzon Diagnostics   NR   IgG, IgM                                                                               | 73.4%, 99.9% (Used author-adjusted estimate)                                         | 4.4% (4.1-4.6%)                                  |
| Freiesleben (Copenhagen University Hospital) <sup>64</sup>                  | 2020-02-17 to 2020-04-17 | Copenhagen   Copenhagen   | Sublocal         | High                 | 1019        | Mean 31.71 (SD 4.52)  | 100.0      | Non-probability | Pregnant or parturient women       | 1.8%                                                 | YHLO Biotechnology   YHLO's iFlash 1800 and SARS-CoV-2 IgM/IgG kits   IgG, IgM                                   | 97.8%, 97.8% (Used Bastos SR/MA data; no sens, spec, or author adjustment available) | 0.3% (0.0-0.9%)                                  |
| <b>Finland</b>                                                              |                          |                           |                  |                      |             |                       |            |                 |                                    |                                                      |                                                                                                                  |                                                                                      |                                                  |
| Kantele (University of Helsinki) <sup>68</sup>                              | 2020-04-22 to 2020-05-15 | Uusimaa   Helsinki        | Sublocal         | High                 | 1095        | Median 38 (IQR 31-48) | 81.7       | Non-probability | Health care workers and caregivers | 6.7%                                                 | Euroimmun   EUROLabwork station SARS-CoV-2 IgG ELISA   IgG                                                       | 0.6%, 0.9% (FINDDx / MUHC independent evaluation)                                    | -                                                |
| <b>France</b>                                                               |                          |                           |                  |                      |             |                       |            |                 |                                    |                                                      |                                                                                                                  |                                                                                      |                                                  |
| Anna ( Institut Curie) <sup>69</sup>                                        | 2020-04-28 to 2020-07-31 | Île-de-France   Paris     | Local            | Moderate             | 1847        | Mean 38 (Range 19-75) | 77.4       | Non-probability | Health care workers and caregivers | 11.6% (10.2-13.2%)                                   | Institut Curie - author designed   N/A - author designed   IgG                                                   | No data                                                                              | -                                                |
| Dimeglio (Centre Hospitalier Universitaire (CHU) de Toulouse) <sup>70</sup> | 2020-06-10 to 2020-07-10 | Toulouse                  | Sublocal         | High                 | 8758        | Median 40 (IQR 32-50) | 80.4       | Non-probability | Health care workers and caregivers | 3.2% (2.8-3.5%)                                      | Beijing Wantai Biological Pharmacy Enterprise Co.   Wantai ELISA kit   NR                                        | 1.0%, 1.0% (FINDDx / MUHC independent evaluation)                                    | -                                                |
| Roederer (Médecins sans Frontières (Epicentre) ) <sup>71</sup>              | 2020-06-23 to 2020-07-02 | Ile de France   Paris     | Local            | High                 | 818         | Mean 39 (NR)          | 20.4       | Non-probability | Persons experiencing homelessness  | 52.0%                                                | N/A - Author Designed   Luciferase-Linked Immunosorbent Assay N, Luciferase-Linked Immunosorbent Assay S, Pseudo | No data                                                                              | -                                                |

| Article Author (Study Organization)                    | Sampling Dates (YMD)     | Location                    | Geographic Scope | Overall Risk of Bias | Sample Size | Age                   | Female (%) | Sampling method | Sample frame                       | Uncorrected Seroprevalence (95% Confidence Interval) | Test Manufacturers   Names   Isotypes                                                                            | Test Sens, Spec (Source)                                | Corrected Seroprevalence (95% Credible Interval) |
|--------------------------------------------------------|--------------------------|-----------------------------|------------------|----------------------|-------------|-----------------------|------------|-----------------|------------------------------------|------------------------------------------------------|------------------------------------------------------------------------------------------------------------------|---------------------------------------------------------|--------------------------------------------------|
|                                                        |                          |                             |                  |                      |             |                       |            |                 |                                    |                                                      | Neutralization Test   IgG                                                                                        |                                                         |                                                  |
| Pere (Hopital Europeen Georges Pompidou) <sup>72</sup> | 2020-05-02 to 2020-06-26 | Île-de-France   Paris       | Sublocal         | High                 | 3569        | Median 39.6 (NR)      | 74.8       | Non-probability | Health care workers and caregivers | 11.9%                                                | Abbott   Abbott Architect SARS-CoV-2 IgG   IgG                                                                   | 0.4%, 1.0% (FINDDx / MUHC independent evaluation)       | -                                                |
| Tsatsaris (Université Paris-Saclay) <sup>73</sup>      | 2020-04-29 to 2020-06-26 | Île-de-France   Paris       | Sublocal         | High                 | 529         | Mean 33.7 (SD 4.7)    | 100.0      | Non-probability | Pregnant or parturient women       | 4.7% (3.0-6.7%)                                      | Abbott   SARS-CoV-2 IgG Architect assay   IgG                                                                    | 0.4%, 1.0% (FINDDx / MUHC independent evaluation)       | -                                                |
| Gallais (Strasbourg University Hospital) <sup>74</sup> | 2020-05-07 to 2020-06-26 | Grand-Est   Strasbourg      | Local            | High                 | 11          | Mean 50.6 (SD 7.8)    | 45.5       | Non-probability | Contacts of COVID patients         | 0.0%                                                 | Abbott Laboratories   Abbott Architect SARS-CoV-2 IgG assay   IgG                                                | 0.4%, 1.0% (FINDDx / MUHC independent evaluation)       | -                                                |
| Mesnil (Rothschild Foundation Hospital) <sup>76</sup>  | 2020-06-08 to 2020-06-22 | Paris   Paris               | Sublocal         | High                 | 646         | Mean 39 (Range 28-50) | 73.1       | Non-probability | Health care workers and caregivers | 12.0%                                                | Roche   Elecsys Anti-SARS-CoV-2 Roche COBAS 6000   IgG                                                           | 99.5%, 99.8% (Test developer / manufacturer evaluation) | 10.7% (6.2-14.6%)                                |
| Delmas (Cochin APHP) <sup>77</sup>                     | 2020-05-14 to 2020-06-17 | Île-de-France   Paris       | Sublocal         | High                 | 4607        | Mean 41.8 (SD 12.6)   | 75.1       | Non-probability | Health care workers and caregivers | 11.5% (10.6-12.4%)                                   | Abbott Laboratories   Abbott-Architect test   IgG                                                                | 0.4%, 1.0% (FINDDx / MUHC independent evaluation)       | -                                                |
| Mattern (Paris Saclay University) <sup>79</sup>        | 2020-05-04 to 2020-05-31 | Paris   Paris               | Sublocal         | High                 | 249         | Median 33 (IQR 29-36) | 100.0      | Non-probability | Pregnant or parturient women       | 8.0%                                                 | Ortho-Clinical Diagnostics; Abbott   Abbott SARS-CoV-2 IgG assay   IgG                                           | 0.4%, 1.0% (FINDDx / MUHC independent evaluation)       | -                                                |
| Bal (Université Claude Bernard Lyon) <sup>80</sup>     | 2020-04-10 to 2020-05-28 | Auvergne-Rhône-Alpes   Lyon | Sublocal         | High                 | 190         | Median 36 (NR)        | NR         | Non-probability | Health care workers and caregivers | 3.7%                                                 | Beijing; China bioMérieux; France; Lyon; Wantai   Wantai SARS-CoV-2 Ab ELISA kit VIDAS SARS-CoV-2 IgG test   IgG | No data                                                 | -                                                |

| Article Author (Study Organization)                   | Sampling Dates (YMD)     | Location                      | Geographic Scope | Overall Risk of Bias | Sample Size | Age                                                                               | Female (%) | Sampling method | Sample frame                                   | Uncorrected Seroprevalence (95% Confidence Interval) | Test Manufacturers   Names   Isotypes                                                                                                                                    | Test Sens, Spec (Source)                                  | Corrected Seroprevalence (95% Credible Interval) |
|-------------------------------------------------------|--------------------------|-------------------------------|------------------|----------------------|-------------|-----------------------------------------------------------------------------------|------------|-----------------|------------------------------------------------|------------------------------------------------------|--------------------------------------------------------------------------------------------------------------------------------------------------------------------------|-----------------------------------------------------------|--------------------------------------------------|
| Fumery (Picardie University) <sup>83</sup>            | 2020-03-25 to 2020-05-11 | Somme   Amiens                | Sublocal         | High                 | 146         | Median 38 (Range 17-81)                                                           | 49.3       | Non-probability | Patients seeking care for non-COVID-19 reasons | 4.8%                                                 | DiaSorin   Liaison® SARS- CoV-2 S1/S2 IgG   IgG                                                                                                                          | 97.4%, 98.5% (Test developer / manufacturer evaluation)   | 4.0% (0.3-8.3%)                                  |
| Solodky (Centre Leon Berard) <sup>85</sup>            | 2020-03-01 to 2020-04-16 | Auvergne-Rhône-Alpes   Lyon   | Sublocal         | High                 | 85          | NR                                                                                | NR         | Non-probability | Health care workers and caregivers             | 5.9%                                                 | TODA Pharma   TODA Coronadiag   IgG, IgM                                                                                                                                 | 100.0%, 100.0% (Test developer / manufacturer evaluation) | 4.6% (0.1-10.0%)                                 |
| Solodky (Centre Leon Berard) <sup>85</sup>            | 2020-03-01 to 2020-04-16 | Auvergne-Rhône-Alpes   Lyon   | Sublocal         | High                 | 244         | NR                                                                                | NR         | Non-probability | Patients seeking care for non-COVID-19 reasons | 5.3%                                                 | TODA Pharma   TODA Coronadiag   IgG, IgM                                                                                                                                 | 100.0%, 100.0% (Test developer / manufacturer evaluation) | 4.8% (1.0-8.4%)                                  |
| Germain (CHU Lille) <sup>88</sup>                     | 2019-11-01 to 2020-03-16 | Lille                         | Local            | High                 | 235         | Median 68yo (IQR 57-79)                                                           | 51.9       | Non-probability | Tissue donor                                   | 0.9%                                                 | Wantai   SARS-CoV-21 total Ab ELISA test   NR                                                                                                                            | 1.0%, 1.0% (FINDDx / MUHC independent evaluation)         | -                                                |
| <b>Germany</b>                                        |                          |                               |                  |                      |             |                                                                                   |            |                 |                                                |                                                      |                                                                                                                                                                          |                                                           |                                                  |
| Armann (Technische Universität Dresden) <sup>91</sup> | 2020-09-15 to 2020-10-13 | Saxony                        | Regional         | Moderate             | 1779        | Median 15 (students); 50 (teachers) (IQR 14-16 (students); 36-57 (teachers))      | 55.8       | Non-probability | Multiple populations                           | 0.7%                                                 | 1) DiaSorin LIAISON; 2) Abbott; 3) EUROIMMUN   1) Liaison® SARS- CoV-2 S1/S2 IgG, 2) Abbott Architect SARS-CoV-2 IgG assay, 3) Euroimmun Anti-SARS-CoV-2 ELISA IgG   IgG | No data                                                   | -                                                |
| Thielecke (Berlin Institute of Health) <sup>92</sup>  | 2020-09-28 to 2020-10-02 | City State of Berlin   Berlin | Local            | Moderate             | 672         | Median Children (4.4), Educators (44), Household Members (36) (Range Children (1- | NR         | Probability     | Multiple populations                           | 0.1%                                                 | Euroimmun AG; Germany   EUROLabWorkstation anti-SARS-CoV-2 IgG   IgG                                                                                                     | 0.6%, 0.9% (FINDDx / MUHC independent evaluation)         | -                                                |

| Article Author (Study Organization)                                               | Sampling Dates (YMD)     | Location                            | Geographic Scope | Overall Risk of Bias | Sample Size | Age                                                                                                                                                                                                                  | Female (%) | Sampling method | Sample frame                                   | Uncorrected Seroprevalence (95% Confidence Interval) | Test Manufacturers   Names   Isotypes                               | Test Sens, Spec (Source)                                | Corrected Seroprevalence (95% Credible Interval) |
|-----------------------------------------------------------------------------------|--------------------------|-------------------------------------|------------------|----------------------|-------------|----------------------------------------------------------------------------------------------------------------------------------------------------------------------------------------------------------------------|------------|-----------------|------------------------------------------------|------------------------------------------------------|---------------------------------------------------------------------|---------------------------------------------------------|--------------------------------------------------|
|                                                                                   |                          |                                     |                  |                      |             | 6.3), Educators (18-78), Household Members (0-90))                                                                                                                                                                   |            |                 |                                                |                                                      |                                                                     |                                                         |                                                  |
| Rauber (University Hospital Heidelberg) <sup>94</sup>                             | 2020-05-05 to 2020-08-06 | Baden-Württemberg   Heidelberg      | Sublocal         | High                 | 219         | Median 56.9 (Range 18.1-78.2)                                                                                                                                                                                        | 40.6       | Non-probability | Patients seeking care for non-COVID-19 reasons | 3.2%                                                 | EUROIMMUN <sup>TM</sup>   Euroimmun Anti-SARS-CoV-2 ELISA IgG   IgG | 0.6%, 0.9% (FINDDx / MUHC independent evaluation)       | -                                                |
| Hoffmann (Brandenburg University of Technology Cottbus-Senftenberg) <sup>95</sup> | 2020-07-01 to 2020-07-31 | Brandenburg   Oberspreewald-Lausitz | Sublocal         | High                 | 156         | Mean 42.7 (very-high-risk group); 46.77 (high-risk group); 44.7 (medium risk group); 45.6 (low-risk group) (SD 11.6 (very-high-risk group); 11.91 (high-risk group); 10.9 (medium risk group); 8.5 (low-risk group)) | 86.5       | Non-probability | Health care workers and caregivers             | 1.3%                                                 | Author-designed   NR   NR                                           | 99.5%, 99.8% (Test developer / manufacturer evaluation) | 1.5% (0.0-3.8%)                                  |
| Finkenzeller (Munich Clinic) <sup>96</sup>                                        | 2020-06-29 to 2020-07-29 | Bavaria   Tirschenreuth, Wieden     | Sublocal         | Moderate             | 1838        | 18-29 (n=322); 30-39 (n=321); 40-49 (n=396); 50-59 (N=536); 60-69 (n=176); >69 (n=2);                                                                                                                                | 78.5       | Non-probability | Health care workers and caregivers             | 15.1%                                                | Roche Diagnostics   Elecsys® Anti-SARS-CoV-2 immunassay   IgG, IgM  | 0.8%, 1.0% (FINDDx / MUHC independent evaluation)       | -                                                |
| Finkenzeller (Munich Clinic) <sup>96</sup>                                        | 2020-06-29 to 2020-07-29 | Bavaria   Tirschenreuth, Wieden     | Sublocal         | High                 | 986         | 18-29 (n=329); 30-39 (n=227); 40-49 (n=151); 50-59 (N=163); 60-69                                                                                                                                                    | 22.8       | Non-probability | Essential non-healthcare workers               | 3.7%                                                 | Roche Diagnostics   Elecsys® Anti-SARS-CoV-2 immunassay   IgG, IgM  | 0.8%, 1.0% (FINDDx / MUHC independent evaluation)       | -                                                |

| Article Author (Study Organization)                               | Sampling Dates (YMD)     | Location             | Geographic Scope | Overall Risk of Bias | Sample Size | Age                     | Female (%) | Sampling method | Sample frame                                 | Uncorrected Seroprevalence (95% Confidence Interval) | Test Manufacturers   Names   Isotypes                                                                                                                     | Test Sens, Spec (Source)                          | Corrected Seroprevalence (95% Credible Interval) |
|-------------------------------------------------------------------|--------------------------|----------------------|------------------|----------------------|-------------|-------------------------|------------|-----------------|----------------------------------------------|------------------------------------------------------|-----------------------------------------------------------------------------------------------------------------------------------------------------------|---------------------------------------------------|--------------------------------------------------|
|                                                                   |                          |                      |                  |                      |             | (n=34); >69 (n=1);      |            |                 |                                              |                                                      |                                                                                                                                                           |                                                   |                                                  |
| Brehm (University Medical Center Hamburg-Eppendorf) <sup>98</sup> | 2020-06-22 to 2020-07-17 | Hamburg   Hamburg    | Sublocal         | Moderate             | 1253        | Median 36 (IQR 29-48)   | 74.5       | Non-probability | Health care workers and caregivers           | 1.8% (1.0-2.5%)                                      | Euroimmun   Euroimmun SARS-CoV-2 IgG ELISA   IgG                                                                                                          | 0.6%, 0.9% (FINDDx / MUHC independent evaluation) | -                                                |
| Mack (Saarland University) <sup>99</sup>                          | 2020-06-16 to 2020-06-30 |                      | National         | High                 | 1007        | Median 31 (IQR 25-37)   | 2.5        | Non-probability | Non-essential workers and unemployed persons | 2.1% (1.4-3.2%)                                      | Roche; EUROimmun; NR   EUROimmun anti-SARS-CoV-2 ELISA (IgG), Cobas Elecsys Anti-SARS-CoV-2 chemiluminescent immunoassay (CLIA), Neutralizing assay   IgG | No data                                           | -                                                |
| Epstude (Thuringia Clinic) <sup>100</sup>                         | 2020-06-15 to 2020-06-30 | Thuringia   Saalfeld | Sublocal         | High                 | 45          | Mean 47.8 (SD 10.4)     | 86.7       | Non-probability | Health care workers and caregivers           | 0.0%                                                 | PerkinElmer Inc   Euroimmun Anti-SARS-CoV-2 ELISA IgG   IgG                                                                                               | 0.4%, 1.0% (FINDDx / MUHC independent evaluation) | -                                                |
| Epstude (Thuringia Clinic) <sup>100</sup>                         | 2020-06-15 to 2020-06-30 | Thuringia   Saalfeld | Sublocal         | High                 | 20          | Mean 39.4 (SD 10.2)     | 70.0       | Non-probability | Health care workers and caregivers           | 5.0%                                                 | PerkinElmer Inc   Euroimmun Anti-SARS-CoV-2 ELISA IgG   IgG                                                                                               | 0.4%, 1.0% (FINDDx / MUHC independent evaluation) | -                                                |
| Bahrs (Jena University Hospital) <sup>102</sup>                   | 2020-05-19 to 2020-06-19 | Thuringia   Jena     | Sublocal         | High                 | 660         | Median 40.5 (IQR 32-49) | 73.6       | Non-probability | Health care workers and caregivers           | 2.7%                                                 | Roche; Epitope Diagnostics   EDI Novel Coronavirus SARS-CoV-2 IgG ELISA kit, Elecsys Anti-SARS-CoV-2 kit   IgG                                            | No data                                           | -                                                |



| Article Author (Study Organization)                                             | Sampling Dates (YMD)     | Location                     | Geographic Scope | Overall Risk of Bias | Sample Size | Age                                            | Female (%) | Sampling method | Sample frame                                   | Uncorrected Seroprevalence (95% Confidence Interval) | Test Manufacturers   Names   Isotypes                                                                                                                                                                                                                                                                                     | Test Sens, Spec (Source)                                                             | Corrected Seroprevalence (95% Credible Interval) |
|---------------------------------------------------------------------------------|--------------------------|------------------------------|------------------|----------------------|-------------|------------------------------------------------|------------|-----------------|------------------------------------------------|------------------------------------------------------|---------------------------------------------------------------------------------------------------------------------------------------------------------------------------------------------------------------------------------------------------------------------------------------------------------------------------|--------------------------------------------------------------------------------------|--------------------------------------------------|
| Herzberg (University Hospitals of the Ruhr-University of Bochum) <sup>103</sup> | 2020-04-14 to 2020-06-16 | Schleswig-Holstein   Hamburg | Sublocal         | High                 | 871         | Mean 40 (SD 14.2)                              | 75.1       | Non-probability | Health care workers and caregivers             | 2.6%                                                 | Mikrogen Diagnostik; Euroimmun   recomWell SARS-CoV2 IgG immunoassay test, anti-SARS-CoV-2 ELISA (IgG) test   IgG                                                                                                                                                                                                         | 75.6%, 97.6% (Used Bastos SR/MA data; no sens, spec, or author adjustment available) | 0.7% (0.0-2.1%)                                  |
| Malfertheiner (University of Regensburg) <sup>106</sup>                         | 2020-03-15 to 2020-06-07 | Bavaria   Regensburg         | Sublocal         | High                 | 139         | 18-35 (n = 27); 36-50 (n = 43); 51-65 (n = 32) | NR         | Non-probability | Health care workers and caregivers             | 0.0%                                                 | EUROIMMUN AG; Roche Diagnostics   Anti-SARS-CoV-2 IgG and IgA ELISA, Elecsys Anti-SARS-CoV-2   IgG, IgA                                                                                                                                                                                                                   | 75.6%, 97.6% (Used Bastos SR/MA data; no sens, spec, or author adjustment available) | 0.7% (0.0-2.9%)                                  |
| Thieme (Ruhr-University Bochum) <sup>109</sup>                                  | 2020-04-01 to 2020-05-31 | Bochum                       | Local            | High                 | 99          | Median 51 (IQR 41-62)                          | 43.4       | Non-probability | Patients seeking care for non-COVID-19 reasons | 3.0%                                                 | Euroimmun   NR   IgG, IgA                                                                                                                                                                                                                                                                                                 | 0.9%, 0.8% (FINDDx / MUHC independent evaluation)                                    | -                                                |
| Erber (Technical University of Munich) <sup>110</sup>                           | 2020-04-14 to 2020-05-29 | Bavaria   Munich             | Sublocal         | High                 | 4554        | Mean 38.5 (NR)                                 | 70.4       | Non-probability | Health care workers and caregivers             | 2.4% (1.9-2.9%)                                      | Unclear   Unclear which chemiluminescent immunoassay was used. "In all samples with incongruent results, IgG antibodies against SARS-CoV-2 S1 protein were determined using an enzyme linked immunosorbent assay (ELISA) (Euroimmun, Luebeck, Germany), and immunoblot was used to differentiate antibodies against N, S1 | 97.8%, 97.8% (Used Bastos SR/MA data; no sens, spec, or author adjustment available) | 0.3% (0.0-0.8%)                                  |

| Article Author (Study Organization)                | Sampling Dates (YMD)     | Location                                                | Geographic Scope | Overall Risk of Bias | Sample Size | Age                                | Female (%) | Sampling method | Sample frame                                   | Uncorrected Seroprevalence (95% Confidence Interval) | Test Manufacturers   Names   Isotypes                                                                                                                               | Test Sens, Spec (Source)                          | Corrected Seroprevalence (95% Credible Interval) |
|----------------------------------------------------|--------------------------|---------------------------------------------------------|------------------|----------------------|-------------|------------------------------------|------------|-----------------|------------------------------------------------|------------------------------------------------------|---------------------------------------------------------------------------------------------------------------------------------------------------------------------|---------------------------------------------------|--------------------------------------------------|
|                                                    |                          |                                                         |                  |                      |             |                                    |            |                 |                                                |                                                      | and the receptor binding domain of SARS-CoV-2 from those against seasonal coronaviruses 165 (Mikrogen, Neuried, Germany)"   IgG                                     |                                                   |                                                  |
| Choi (Charité University) <sup>112</sup>           | 2020-03-19 to 2020-05-19 | Berlin   Berlin                                         | Sublocal         | High                 | 223         | Median 54 (IQR 42.64)              | 38.1       | Non-probability | Patients seeking care for non-COVID-19 reasons | 7.1%                                                 | Euroimmun Medizinische Labordiagnostika AG   Euroimmun Analyzer I   IgG, IgA                                                                                        | 0.9%, 0.8% (FINDDx / MUHC independent evaluation) | -                                                |
| Neumann (University of Bremen) <sup>114</sup>      | 2020-03-31 to 2020-05-16 | Bremen                                                  | Local            | High                 | 281         | NR                                 | NR         | Non-probability | Multiple populations                           | 2.1%                                                 | Euroimmun   Euroimmun AG ELISA   IgG, IgA                                                                                                                           | 0.7%, 0.7% (FINDDx / MUHC independent evaluation) | -                                                |
| Tonshoff (Heidelberg University) <sup>115</sup>    | 2020-04-22 to 2020-05-15 | Baden-Württemberg   Tübingen, Ulm, Freiburg, Heidelberg | Regional         | Moderate             | 4964        | Median 40 (IQR 36-43)              | 61.1       | Non-probability | Multiple populations                           | 1.7% (1.3-2.0%)                                      | Euroimmun; Roche Elecsys' Mikrogen in-house   Euroimmun SARS-CoV-2 IgG; Roche Elecsys Anti-SARS-CoV-2; Mikrogen recomWell EILSA; in-house Luminex-based assay   IgG | 75.6%, 97.6% (None)                               | 0.3% (0.1-0.4%)                                  |
| Zöllkau (Universitätsklinikum Jena) <sup>116</sup> | 2020-04-06 to 2020-05-13 | Thuringia   Jena                                        | Local            | High                 | 180         | NR                                 | 100.0      | Non-probability | Pregnant or parturient women                   | 0.6% (0.0-1.7%)                                      | Epitope Diagnostics   NR   IgG                                                                                                                                      | 0.8%, 1.0% (FINDDx / MUHC independent evaluation) | -                                                |
| Schmidt (University of Hannover) <sup>117</sup>    | 2020-04-20 to 2020-04-30 | Lower Saxony   Hannover                                 | Sublocal         | High                 | 385         | 18-29 (n=55); 30-49 (n=154); 50-64 | 80.0       | Non-probability | Health care workers and caregivers             | 2.9%                                                 | EUROIMMUN   Euroimmun Anti-SARS-CoV-2 ELISA IgG   IgG                                                                                                               | 0.8%, 1.0% (FINDDx / MUHC independent evaluation) | -                                                |

| Article Author (Study Organization)                    | Sampling Dates (YMD)     | Location                       | Geographic Scope | Overall Risk of Bias | Sample Size | Age                                                                                                                                             | Female (%) | Sampling method | Sample frame                       | Uncorrected Seroprevalence (95% Confidence Interval) | Test Manufacturers   Names   Isotypes                     | Test Sens, Spec (Source)                                                             | Corrected Seroprevalence (95% Credible Interval) |
|--------------------------------------------------------|--------------------------|--------------------------------|------------------|----------------------|-------------|-------------------------------------------------------------------------------------------------------------------------------------------------|------------|-----------------|------------------------------------|------------------------------------------------------|-----------------------------------------------------------|--------------------------------------------------------------------------------------|--------------------------------------------------|
|                                                        |                          |                                |                  |                      |             | (n=170);<br>≥65 (n=6)                                                                                                                           |            |                 |                                    |                                                      |                                                           |                                                                                      |                                                  |
| Korth (University Hospital Essen) <sup>119</sup>       | 2020-03-25 to 2020-04-21 | North Rhine-Westphalia   Essen | Sublocal         | High                 | 316         | Mean 36.7 (Average age of high-risk group); 42.3 (Average age of low-risk group) (SD 10.7 (SD of high-risk group); 13.2 (SD of low-risk group)) | 64.6       | Non-probability | Health care workers and caregivers | 1.6%                                                 | EUROIMMUN   Euroimmun Anti-SARS-CoV-2-IgG   IgG           | 0.8%, 1.0% (FINDDx / MUHC independent evaluation)                                    | -                                                |
| Harsch (Thuringia Clinic) <sup>120</sup>               | 2020-04-16 to 2020-04-21 | Thuringia   Saalfeld           | Sublocal         | High                 | 18          | Mean 44.9 (Range 21-60)                                                                                                                         | NR         | Non-probability | Health care workers and caregivers | 0.0%                                                 | EUROIMMUN   EUROIMMUN™   IgG                              | 0.4%, 1.0% (FINDDx / MUHC independent evaluation)                                    | -                                                |
| Behrens (Hannover Medical School) <sup>121</sup>       | 2020-03-23 to 2020-04-17 | Lower Saxony   Hannover        | Local            | High                 | 217         | Mean 36.5 (Range 18-63)                                                                                                                         | 65.0       | Non-probability | Health care workers and caregivers | 1.4%                                                 | EUROIMMUN   Euroimmun Anti-SARS-CoV-2 ELISA IgG   IgG     | 0.6%, 0.9% (FINDDx / MUHC independent evaluation)                                    | -                                                |
| Kern (Universitätsmedizin Marburg) <sup>122</sup>      | 2020-04-09 to 2020-04-16 | Fulda                          | Sublocal         | High                 | 1780        | 10-19 (n=52, 2.9%), 20-29 (n=422, 23.7%), 30-39 (n=378, 21.2%), 40-49 (n=347, 19.5%), 50-59 (n=431, 24.2%), 60-69 (n=150, 8.4%)                 | 79.8       | Non-probability | Multiple populations               | 1.0% (0.6-1.5%)                                      | EUROIMMUN   Euroimmun Anti-SARS-CoV-2 IgG IgA ELISA   IgG | 0.8%, 1.0% (FINDDx / MUHC independent evaluation)                                    | -                                                |
| Kraehling (Goethe-University Frankfurt) <sup>123</sup> | 2020-04-06 to 2020-04-14 | Hesse   Frankfurt              | Local            | High                 | 998         | <30 (n=115); 30-40 (n=172); 41-50 (n=213); 51-60 (n=399); >60 (n=101)                                                                           | 21.5       | Non-probability | Essential non-healthcare workers   | 0.4% (0.2-1.0%)                                      | Author-designed   N/A - Author-designed   IgG             | 75.6%, 97.6% (Used Bastos SR/MA data; no sens, spec, or author adjustment available) | 0.1% (0.0-0.5%)                                  |

| Article Author (Study Organization)                                                                          | Sampling Dates (YMD)     | Location           | Geographic Scope | Overall Risk of Bias | Sample Size | Age                                                         | Female (%) | Sampling method | Sample frame                                 | Uncorrected Seroprevalence (95% Confidence Interval) | Test Manufacturers   Names   Isotypes                                                                         | Test Sens, Spec (Source)                                 | Corrected Seroprevalence (95% Credible Interval) |
|--------------------------------------------------------------------------------------------------------------|--------------------------|--------------------|------------------|----------------------|-------------|-------------------------------------------------------------|------------|-----------------|----------------------------------------------|------------------------------------------------------|---------------------------------------------------------------------------------------------------------------|----------------------------------------------------------|--------------------------------------------------|
| Lackermair (University Hospital Munich) <sup>124</sup>                                                       | 2020-04-02 to 2020-04-06 | Bavaria   Dachau   | Regional         | High                 | 151         | Mean 38 (Range 26-47)                                       | 83.4       | Non-probability | Health care workers and caregivers           | 2.6% (0.8-7.1%)                                      | EUROIMMUN   Euroimmun Anti-SARS-CoV-2 ELISA IgG   IgG                                                         | 0.4%, 1.0% (FINDDx / MUHC independent evaluation)        | -                                                |
| <b>Greece</b>                                                                                                |                          |                    |                  |                      |             |                                                             |            |                 |                                              |                                                      |                                                                                                               |                                                          |                                                  |
| Tsitsilonis (National and Kapodistrian University of Athens) <sup>125</sup>                                  | 2020-06-15 to 2020-07-15 | Athens             | Sublocal         | Moderate             | 2500        | 18-34 (n=1268); 35-54 (n=916); 55-74 (n=309); Unknown (n=7) | 64.0       | Non-probability | Non-essential workers and unemployed persons | 0.9% (0.3-2.1%)                                      | Roche Diagnostics   CE-IVD Roche Cobas Elecsys® Anti-SARS-CoV-2   NR                                          | 100.0%, 99.8% (Used author-adjusted estimate)            | 0.9% (0.6-1.4%)                                  |
| Psichogiou (University of Athens) <sup>127</sup>                                                             | 2020-04-13 to 2020-05-15 | Attica   Athens    | Sublocal         | Moderate             | 1495        | Mean 46.4 (SD 10.3)                                         | 69.7       | Non-probability | Health care workers and caregivers           | 1.0%                                                 | Genebody Inc   GeneBody COVID-19 IgM/IgG detection   IgG, IgM                                                 | 74.1%, 100.0% (Test developer / manufacturer evaluation) | 0.8% (0.0-1.7%)                                  |
| Vlachoyiannopoulos (National and Kapodistrian University of Athens/Laiko University Hospital) <sup>128</sup> | 2020-04-25 to 2020-05-10 | Attica   Athens    | Sublocal         | High                 | 321         | Mean 42.71 (NR)                                             | 67.9       | Non-probability | Health care workers and caregivers           | 2.2%                                                 | EUROIMMUN ; Germany   EUROIMMUN IgG ELISA   IgG                                                               | 0.6%, 0.9% (FINDDx / MUHC independent evaluation)        | -                                                |
| <b>Italy</b>                                                                                                 |                          |                    |                  |                      |             |                                                             |            |                 |                                              |                                                      |                                                                                                               |                                                          |                                                  |
| Caponigro (ASST della Valtellina Alto Lario-Oncologia Medica Sondrio) <sup>134</sup>                         | 2020-03-01 to 2020-10-19 | Lombardy   Sondrio | Sublocal         | Unclear              | 220         | NR                                                          | NR         | Non-probability | Health care workers and caregivers           | 11.4%                                                | Nal Von Minden GmbH (Germany)   NADAL® COVID-19 IgG/IgM Rapid Test (test cassette) REF 243001N-10;   IgG, IgM | 94.1%, 99.2% (Test developer / manufacturer evaluation)  | 10.0% (4.1-16.1%)                                |
| Russo (University of Campania) <sup>135</sup>                                                                | 2020-03-27 to 2020-08-30 | Campania   Naples  | Sublocal         | High                 | 65          | Median 32 (IQR 28-43)                                       | 61.5       | Non-probability | Health care workers and caregivers           | 0.0%                                                 | Xiamen   WANTAI SARS-CoV-2 Ab ELISA   NR                                                                      | 1.0%, 1.0% (FINDDx / MUHC independent evaluation)        | -                                                |

| Article Author (Study Organization)             | Sampling Dates (YMD)     | Location                  | Geographic Scope | Overall Risk of Bias | Sample Size | Age                                  | Female (%) | Sampling method | Sample frame                                   | Uncorrected Seroprevalence (95% Confidence Interval) | Test Manufacturers   Names   Isotypes                                     | Test Sens, Spec (Source)                                                             | Corrected Seroprevalence (95% Credible Interval) |
|-------------------------------------------------|--------------------------|---------------------------|------------------|----------------------|-------------|--------------------------------------|------------|-----------------|------------------------------------------------|------------------------------------------------------|---------------------------------------------------------------------------|--------------------------------------------------------------------------------------|--------------------------------------------------|
| Ralli (Eleemosynaria Apostolica) <sup>136</sup> | 2020-04-14 to 2020-07-31 | Lazio   Rome              | Local            | High                 | 173         | Mean 45.6 (Range 10-80)              | 29.5       | Non-probability | Multiple populations                           | 1.8%                                                 | Inzek B.V   Biozek Medical COVID-19 Rapid Test,   IgG, IgM                | 96.0%, 96.0% (Test developer / manufacturer evaluation)                              | 0.8% (0.0-3.1%)                                  |
| Norsa (Papa Giovanni XXII) <sup>138</sup>       | 2020-03-04 to 2020-07-10 | Lombardy   Bergamo        | Sublocal         | High                 | 90          | <28 (n=32); 38-47 (n=27); >47 (n=31) | 46.7       | Non-probability | Patients seeking care for non-COVID-19 reasons | 21.1%                                                | VivaChek   VivaDiag COVID-19 IgM/IgG Rapid Test   IgG, IgM                | 0.7%, 0.9% (FINDDx / MUHC independent evaluation)                                    | -                                                |
| Medas (University of Cagliari) <sup>140</sup>   | 2020-03-31 to 2020-06-30 | Sardinia   Cagliari       | Sublocal         | High                 | 86          | Mean 57.6 (NR)                       | 62.8       | Non-probability | Patients seeking care for non-COVID-19 reasons | 5.8%                                                 | Snibe   Maglumi platform   IgG, IgM                                       | 97.8%, 97.8% (Used Bastos SR/MA data; no sens, spec, or author adjustment available) | 3.4% (0.0-8.3%)                                  |
| Berte (University of Cagliari) <sup>141</sup>   | 2020-04-15 to 2020-06-15 | Milan, Cagliari, Erlangen | Local            | High                 | 354         | Median 43 (IQR 31-57)                | 37.9       | Non-probability | Patients seeking care for non-COVID-19 reasons | 2.3% (0.8-3.8%)                                      | University of Cagliari   N/A - Author Designed   IgG, IgA                 | 97.6%, 95.2% (Test developer / manufacturer evaluation)                              | 0.7% (0.0-2.4%)                                  |
| Capasso (University of Naples) <sup>142</sup>   | 2020-05-11 to 2020-06-15 | Campania   Naples         | Sublocal         | High                 | 235         | Mean 39.4 (SD 10.9)                  | 54.5       | Non-probability | Health care workers and caregivers             | 10.6%                                                | Ltd.; Shanghai Kehua Bio-engineering Co.; China; Shanghai   NR   IgG, IgM | 0.7%, 1.0% (FINDDx / MUHC independent evaluation)                                    | -                                                |
| Capasso (University of Naples) <sup>142</sup>   | 2020-05-11 to 2020-06-15 | Campania   Naples         | Sublocal         | Moderate             | 862         | Mean 42.9 (SD 13.3)                  | 47.8       | Non-probability | Health care workers and caregivers             | 1.3%                                                 | Ltd.; Shanghai Kehua Bio-engineering Co.; China; Shanghai   NR   IgG, IgM | 0.7%, 1.0% (FINDDx / MUHC independent evaluation)                                    | -                                                |
| Capasso (University of Naples) <sup>142</sup>   | 2020-05-11 to 2020-06-15 | Campania   Naples         | Sublocal         | Moderate             | 310         | Mean 42.3 (SD 12.4)                  | 67.1       | Non-probability | Patients seeking care for non-COVID-19 reasons | 2.9%                                                 | Ltd.; Shanghai Kehua Bio-engineering Co.; China; Shanghai   NR   IgG, IgM | 0.7%, 1.0% (FINDDx / MUHC independent evaluation)                                    | -                                                |
| Cosma (University of Turin) <sup>144</sup>      | 2020-04-16 to 2020-06-04 | Piedmont   Turin          | Local            | High                 | 138         | NR                                   | 100.0      | Non-probability | Pregnant or parturient women                   | 5.8%                                                 | Boditech   AFLIASTM COVID-19   IgG                                        | 66.0%, 96.6% (Used Bastos SR/MA data; no sens, spec,                                 | 3.7% (0.0-9.7%)                                  |

| Article Author (Study Organization)                  | Sampling Dates (YMD)     | Location         | Geographic Scope | Overall Risk of Bias | Sample Size | Age                                                                                                                                                                                                                          | Female (%) | Sampling method | Sample frame                | Uncorrected Seroprevalence (95% Confidence Interval) | Test Manufacturers   Names   Isotypes                                                                                                            | Test Sens, Spec (Source)                                                             | Corrected Seroprevalence (95% Credible Interval) |
|------------------------------------------------------|--------------------------|------------------|------------------|----------------------|-------------|------------------------------------------------------------------------------------------------------------------------------------------------------------------------------------------------------------------------------|------------|-----------------|-----------------------------|------------------------------------------------------|--------------------------------------------------------------------------------------------------------------------------------------------------|--------------------------------------------------------------------------------------|--------------------------------------------------|
|                                                      |                          |                  |                  |                      |             |                                                                                                                                                                                                                              |            |                 |                             |                                                      |                                                                                                                                                  | or author adjustment available)                                                      |                                                  |
| Lorenzo (Santagostino Medical Center) <sup>146</sup> | 2020-05-02 to 2020-05-31 | Lombardy   Milan | Local            | High                 | 119         | Mean 47 (healthcare workers); 79 (family member old); 42 (family member middle age); 11 (family member youth) (SD 18 (health care workers); 6 (family member old); 12 (family member middle age); 7 (family member young); ) | 54.6       | Non-probability | Family of essential workers | 23.5%                                                | Prima Lab   IgM/IgG serological rapid tests   IgG, IgM                                                                                           | 0.8%, 0.9% (FINDDx / MUHC independent evaluation)                                    | -                                                |
| Lastrucci (University of Florence) <sup>147</sup>    | 2020-05-01 to 2020-05-31 | Prato            | Regional         | Moderate             | 4656        | Median 49 (IQR 38-57)                                                                                                                                                                                                        | 67.1       | Non-probability | Multiple populations        | 3.0% (2.5-3.5%)                                      | Hangzhou Laihe Biotech Co.; Ltd; Hangzhou China   LYHER Novel Coronavirus (2019-nCoV) IgM/IgG Antibody Combo Test Kit(Colloidal Gold)   IgG, IgM | 100.0%, 98.8% (Test developer / manufacturer evaluation)                             | 1.5% (0.0-2.8%)                                  |
| Papalini (University of Perugia) <sup>148</sup>      | 2020-05-04 to 2020-05-31 | Umbria   Perugia | Local            | Unclear              | 2843        | NR                                                                                                                                                                                                                           | NR         | Non-probability | Multiple populations        | 5.4%                                                 | Screen Italia   SCREEN test COVID-19   IgG                                                                                                       | 66.0%, 96.6% (Used Bastos SR/MA data; no sens, spec, or author adjustment available) | 3.2% (1.4-4.8%)                                  |

| Article Author (Study Organization)                                                     | Sampling Dates (YMD)     | Location          | Geographic Scope | Overall Risk of Bias | Sample Size | Age                     | Female (%) | Sampling method | Sample frame                                   | Uncorrected Seroprevalence (95% Confidence Interval) | Test Manufacturers   Names   Isotypes                                                                                               | Test Sens, Spec (Source)                                                             | Corrected Seroprevalence (95% Credible Interval) |
|-----------------------------------------------------------------------------------------|--------------------------|-------------------|------------------|----------------------|-------------|-------------------------|------------|-----------------|------------------------------------------------|------------------------------------------------------|-------------------------------------------------------------------------------------------------------------------------------------|--------------------------------------------------------------------------------------|--------------------------------------------------|
| Papalini (University of Perugia) <sup>148</sup>                                         | 2020-05-04 to 2020-05-31 | Umbria   Perugia  | Sublocal         | High                 | 270         | Median 52 (Range 10-83) | NR         | Non-probability | Patients seeking care for non-COVID-19 reasons | 3.7%                                                 | Screen Italia   SCREEN test COVID-19   IgG                                                                                          | 66.0%, 96.6% (Used Bastos SR/MA data; no sens, spec, or author adjustment available) | 1.4% (0.0-4.5%)                                  |
| Sperotto (The University of Udine) <sup>150</sup>                                       | 2020-04-01 to 2020-05-30 | Udine   Udine     | Sublocal         | High                 | 70          | Median 56 (Range 23-73) | 51.4       | Non-probability | Patients seeking care for non-COVID-19 reasons | 1.4%                                                 | Cellex   Cellex qSARS-CoV-2 immunoglobulin G (IgG)/immunoglobulin M (IgM) point-of-care antibodies diagnostic rapid test   IgG, IgM | 0.8%, 0.9% (FINDDx / MUHC independent evaluation)                                    | -                                                |
| Stellato (Azienda Ospedaliera di Rilievo Nazionale Santobono Pausilipon) <sup>151</sup> | 2020-04-03 to 2020-05-29 | Campania   Naples | Sublocal         | High                 | 249         | NR                      | NR         | Non-probability | Health care workers and caregivers             | 2.0%                                                 | VivaDiag; N/A   NR   IgG, IgM                                                                                                       | 66.0%, 96.6% (Used Bastos SR/MA data; no sens, spec, or author adjustment available) | 0.8% (0.0-3.2%)                                  |
| Stellato (Azienda Ospedaliera di Rilievo Nazionale Santobono Pausilipon) <sup>151</sup> | 2020-04-03 to 2020-05-29 | Campania   Naples | Sublocal         | High                 | 1397        | NR                      | NR         | Non-probability | Multiple populations                           | 0.4%                                                 | VivaDiag; N/A   NR   IgG, IgM                                                                                                       | 66.0%, 96.6% (Used Bastos SR/MA data; no sens, spec, or author adjustment available) | 0.1% (0.0-0.4%)                                  |
| Plebani (University Hospital Of Padova) <sup>152</sup>                                  | 2020-02-22 to 2020-05-29 | Veneto            | Regional         | High                 | 8285        | Mean 43.2 (SD 11.6)     | 71.6       | Non-probability | Health care workers and caregivers             | 4.6% (4.1-5.0%)                                      | SNIBE – Shenzhen New Industries Biomedical Engineering Co.   MAGLUMI 2019-nCov IgG/IgM CLIA   IgG, IgM                              | 73.0%, 98.0% (Author-reported independent evaluation)                                | 3.7% (2.6-4.6%)                                  |
| Poletti (Bruno Kessler Foundation) <sup>153</sup>                                       | 2020-04-16 to 2020-05-25 | Lombardy          | Regional         | Moderate             | 4120        | Median 50 (IQR 30-61)   | 75.0       | Non-probability | Contacts of COVID patients                     | 53.1%                                                | LIAISON®   LIAISON® SARS-CoV-2 test   IgG                                                                                           | 0.6%, 1.0% (FINDDx / MUHC independent evaluation)                                    | 46.8% (44.6-48.6%)                               |

| Article Author (Study Organization)                                                    | Sampling Dates (YMD)     | Location                              | Geographic Scope | Overall Risk of Bias | Sample Size | Age                     | Female (%) | Sampling method | Sample frame                                   | Uncorrected Seroprevalence (95% Confidence Interval) | Test Manufacturers   Names   Isotypes                               | Test Sens, Spec (Source)                                                             | Corrected Seroprevalence (95% Credible Interval) |
|----------------------------------------------------------------------------------------|--------------------------|---------------------------------------|------------------|----------------------|-------------|-------------------------|------------|-----------------|------------------------------------------------|------------------------------------------------------|---------------------------------------------------------------------|--------------------------------------------------------------------------------------|--------------------------------------------------|
| Calcagno (University of Torino) <sup>155</sup>                                         | 2020-04-17 to 2020-05-20 | Piemonte   Torino (Turin)             | Local            | Moderate             | 5444        | Mean 49.4 (SD 10.6)     | 74.7       | Non-probability | Health care workers and caregivers             | 6.9%                                                 | DiaSorin   LIAISON® SARS-CoV-2 S1/S2 IgG   IgG                      | 0.8%, 1.0% (FINDDx / MUHC independent evaluation)                                    | -                                                |
| Carlo (Azienda Ospedaliera-Universitaria Policlinico Riuniti di Foggia) <sup>156</sup> | 2020-03-17 to 2020-05-18 | Province of Foggia, Apulia   Foggia   | Sublocal         | Moderate             | 3242        | Mean 46.5 (SD 11.7)     | NR         | Non-probability | Health care workers and caregivers             | 1.9% (1.4-2.3%)                                      | Shenzhen YHLO Biotech   iFlash1800 SARS-COV-2 IgG & IgM   IgG, IgM  | 97.0%, 98.8% (Test developer / manufacturer evaluation)                              | 0.9% (0.0-1.9%)                                  |
| Martella (Azienda Usl Toscana Centro Oncology) <sup>157</sup>                          | 2020-05-11 to 2020-05-17 | Tuscany   Florence                    | Sublocal         | Unclear              | 1145        | NR                      | NR         | Non-probability | Patients seeking care for non-COVID-19 reasons | 2.3%                                                 | NR   Quantitative serologic IgM and IgG test (Qt-ST)   IgG, IgM     | No data                                                                              | -                                                |
| Cavaliere (Santo Stefano Hospital) <sup>158</sup>                                      | 2020-04-04 to 2020-05-16 | Tuscany   Prato                       | Local            | High                 | 134         | NR                      | 100.0      | Non-probability | Pregnant or parturient women                   | 4.5%                                                 | Acro Biotech Inc.   COVID-19 IgG/IgM Rapid Test Cassette   IgG, IgM | 0.4%, 0.9% (FINDDx / MUHC independent evaluation)                                    | -                                                |
| Sandri (IRCCS) <sup>159</sup>                                                          | 2020-04-28 to 2020-05-16 | Lombardy   Milan, Castellanza, Varese | Regional         | Moderate             | 3985        | Median 42 (Range 21-86) | 66.8       | Non-probability | Health care workers and caregivers             | 13.4%                                                | DiaSorin   Liaison® SARS- CoV-2 S1/S2 IgG   IgG                     | 0.8%, 1.0% (FINDDx / MUHC independent evaluation)                                    | -                                                |
| Bianchi (Università degli Studi di Milano) <sup>160</sup>                              | 2020-04-15 to 2020-05-15 | Lombardy   Milan                      | Sublocal         | Unclear              | 42          | NR                      | NR         | Non-probability | Patients seeking care for non-COVID-19 reasons | 9.5%                                                 | Diasorin; Abbott Laboratories   NR   IgG                            | 97.8%, 97.8% (Used Bastos SR/MA data; no sens, spec, or author adjustment available) | 6.6% (0.0-15.1%)                                 |
| Bianchi (Università degli Studi di Milano) <sup>160</sup>                              | 2020-04-15 to 2020-05-15 | Lombardy   Milan                      | Sublocal         | Unclear              | 34          | NR                      | NR         | Non-probability | Health care workers and caregivers             | 5.9%                                                 | Diasorin; Abbott Laboratories   NR   IgG                            | 97.8%, 97.8% (Used Bastos SR/MA data; no sens, spec, or author adjustment available) | 3.6% (0.0-11.9%)                                 |



| Article Author (Study Organization)                                                | Sampling Dates (YMD)     | Location           | Geographic Scope | Overall Risk of Bias | Sample Size | Age                     | Female (%) | Sampling method | Sample frame                                   | Uncorrected Seroprevalence (95% Confidence Interval) | Test Manufacturers   Names   Isotypes                                                                                                                   | Test Sens, Spec (Source)                                                             | Corrected Seroprevalence (95% Credible Interval) |
|------------------------------------------------------------------------------------|--------------------------|--------------------|------------------|----------------------|-------------|-------------------------|------------|-----------------|------------------------------------------------|------------------------------------------------------|---------------------------------------------------------------------------------------------------------------------------------------------------------|--------------------------------------------------------------------------------------|--------------------------------------------------|
| Marra (Istituto di Ricovero e Cura a Carattere Scientifico (IRCCS)) <sup>162</sup> | 2020-03-30 to 2020-05-11 | Lombardy           | Regional         | High                 | 166         | Median 46 (IQR 21)      | 71.1       | Non-probability | Multiple populations                           | 41.6%                                                | PRIMA Lab SA   2019-nCoV IgG/IgM Rapid Test Cassette   IgG                                                                                              | 0.7%, 0.9% (FINDDx / MUHC independent evaluation)                                    | 59.7% (50.6-69.2%)                               |
| Baracco (A.S.S.T. Lodi) <sup>164</sup>                                             | 2020-04-23 to 2020-05-05 | Lombardy Region    | Sublocal         | High                 | 2415        | Mean 48 (SD 10.0)       | 72.6       | Non-probability | Health care workers and caregivers             | 16.8%                                                | DiaSorin   The Liaison® DiaSorin® SARS-CoV-2 S1/S2 IgG test   IgG                                                                                       | 0.8%, 1.0% (FINDDx / MUHC independent evaluation)                                    | -                                                |
| Denina (University of Turin) <sup>165</sup>                                        | 2020-03-08 to 2020-04-30 | Piedmont           | Regional         | High                 | 24          | Mean 13 (Range 6-17)    | 66.7       | Non-probability | Patients seeking care for non-COVID-19 reasons | 12.5%                                                | DiaSorin   Liaison® SARS-CoV-2 S1/S2 IgG   IgG                                                                                                          | 0.8%, 1.0% (FINDDx / MUHC independent evaluation)                                    | -                                                |
| Zambelli (Ospedale Papa Giovanni XXIII) <sup>166</sup>                             | 2020-04-01 to 2020-04-30 | Lombardy   Bergamo | Sublocal         | High                 | 560         | Median 65 (Range 19-89) | 60.0       | Non-probability | Patients seeking care for non-COVID-19 reasons | 31.0%                                                | Moers; Germany   NADAL COVID-19 IgG/IgM Test   IgG, IgM                                                                                                 | 92.1%, 99.2% (Author-reported independent evaluation)                                | 32.6% (27.9-36.9%)                               |
| Carozzi (Arezzo Hospital) <sup>168</sup>                                           | 2020-04-01 to 2020-04-30 | Tuscany            | Regional         | High                 | 17098       | NR                      | NR         | Non-probability | Health care workers and caregivers             | 3.1%                                                 | "Zhejiang Orient Gene Biotech Co.; LTD"; Screen Italia S.R.L   Screen Test COVID-19 2019-nCoV IgG/IgM, COVID-19 IgG /IgM Rapid Test Cassette   IgG, IgM | 66.0%, 96.6% (Used Bastos SR/MA data; no sens, spec, or author adjustment available) | 0.2% (0.0-0.8%)                                  |
| Bontadi (National Association of Company and Competent Doctors) <sup>169</sup>     | 2020-04-11 to 2020-04-29 | Veneto             | Local            | High                 | 1267        | Mean 44 (Range 19-69)   | 17.1       | Non-probability | Essential non-healthcare workers               | 1.6%                                                 | NR; MAGLUMI; NR   Rapid Test (NR), MAGLUMI CLIA, ELISA (NR)   IgG, IgM                                                                                  | No data                                                                              | -                                                |

| Article Author (Study Organization)                        | Sampling Dates (YMD)     | Location           | Geographic Scope | Overall Risk of Bias | Sample Size | Age                                                                  | Female (%) | Sampling method | Sample frame                       | Uncorrected Seroprevalence (95% Confidence Interval) | Test Manufacturers   Names   Isotypes                                                                   | Test Sens, Spec (Source)                              | Corrected Seroprevalence (95% Credible Interval) |
|------------------------------------------------------------|--------------------------|--------------------|------------------|----------------------|-------------|----------------------------------------------------------------------|------------|-----------------|------------------------------------|------------------------------------------------------|---------------------------------------------------------------------------------------------------------|-------------------------------------------------------|--------------------------------------------------|
| Volta (University of Brescia) <sup>171</sup>               | 2020-04-27 to 2020-04-27 | Lombardy   Brescia | Sublocal         | High                 | 76          | Median 46 (IQR 23-69)                                                | 75.0       | Non-probability | Health care workers and caregivers | 11.8%                                                | DiaSorin   NR   IgG                                                                                     | 0.8%, 1.0% (FINDDx / MUHC independent evaluation)     | -                                                |
| Lahner (University of Rome) <sup>172</sup>                 | 2020-04-07 to 2020-04-27 | Lazio   Rome       | Sublocal         | High                 | 1084        | Median 46 (Range 19-69)                                              | 60.9       | Non-probability | Health care workers and caregivers | 0.7%                                                 | Medical Systems   2019-nCoV IgM/IgG CLIA   IgG                                                          | 50.0%, 99.1% (Author-reported independent evaluation) | 0.3% (0.0-1.3%)                                  |
| Landro (Hospital of Bergamo) <sup>170</sup>                | Until 2020-04-24         | Lombardy   Bergamo | Sublocal         | Unclear              | 3000        | NR                                                                   | NR         | Non-probability | Health care workers and caregivers | 13.0%                                                | NR   NR   NR                                                                                            | No data                                               | -                                                |
| Paradiso (Istituto Tumori G. Paolo II) <sup>175</sup>      | 2020-03-26 to 2020-04-17 | Puglia   Bari      | Sublocal         | High                 | 606         | Median 47.5 (Range 20-73)                                            | 60.6       | Non-probability | Health care workers and caregivers | 0.3%                                                 | Snibe Diagnostic   MAGLUMI800 TM   IgG                                                                  | 0.7%, 1.0% (FINDDx / MUHC independent evaluation)     | -                                                |
| Sotgiu (Università degli Studi di Milano) <sup>176</sup>   | 2020-04-02 to 2020-04-16 | Lombardy   Milan   | Local            | High                 | 202         | 20-29 (n=27); 30-39 (n=44); 40-49 (n=57); 50-59 (n=51); 60-69 (n=23) | 65.3       | Non-probability | Health care workers and caregivers | 7.4% (3.8-11.0%)                                     | BioMedomics   BioMedomics IgM-IgG Combined Antibody Rapid Test   IgG                                    | 0.6%, 1.0% (FINDDx / MUHC independent evaluation)     | -                                                |
| Amendola (University of Milan) <sup>177</sup>              | 2020-04-15 to 2020-04-15 | Lombardy   Milan   | Sublocal         | High                 | 663         | Median 44 (NR)                                                       | 83.7       | Non-probability | Health care workers and caregivers | 5.1%                                                 | EUROIMMUN   Euroimmun Anti-SARS-CoV-2 ELISA IgG   IgG                                                   | 0.8%, 1.0% (FINDDx / MUHC independent evaluation)     | -                                                |
| Canetti (San Raffaele Scientific Institute) <sup>178</sup> | 2020-03-15 to 2020-04-15 | Lombardy   Milan   | Sublocal         | High                 | 40          | Median 51 (IQR 34-58)                                                | 77.5       | Non-probability | Health care workers and caregivers | 5.0%                                                 | Diasorin; Prima lab SA   COVID-19 IgG/IgM Rapid Test , DiaSorin LIAISON® SARSCoV-2 S1/S2 IgG test   IgG | No data                                               | -                                                |
| Fusco (D. Cotugno' Hospital) <sup>181</sup>                | 2020-03-23 to 2020-04-02 | Campania   Naples  | Sublocal         | High                 | 115         | Median 43 (IQR 32-51.5)                                              | 48.7       | Non-probability | Health care workers and caregivers | 1.7%                                                 | Snibe Diagnostic   MAGLUMI 2019-nCoV IgG (CLIA)   IgG                                                   | 0.7%, 1.0% (FINDDx / MUHC independent evaluation)     | -                                                |

| Article Author (Study Organization)                                   | Sampling Dates (YMD)     | Location                     | Geographic Scope | Overall Risk of Bias | Sample Size | Age                                                                                                 | Female (%) | Sampling method | Sample frame                                   | Uncorrected Seroprevalence (95% Confidence Interval) | Test Manufacturers   Names   Isotypes                                                            | Test Sens, Spec (Source)                                 | Corrected Seroprevalence (95% Credible Interval) |
|-----------------------------------------------------------------------|--------------------------|------------------------------|------------------|----------------------|-------------|-----------------------------------------------------------------------------------------------------|------------|-----------------|------------------------------------------------|------------------------------------------------------|--------------------------------------------------------------------------------------------------|----------------------------------------------------------|--------------------------------------------------|
| Apolone (Istituto Nazionale Tumori) <sup>184</sup>                    | 2019-09-01 to 2020-03-10 |                              | National         | High                 | 959         | <55 (n=75); 55-65 (n=606); >=65 (n=278)                                                             | 41.4       | Non-probability | Patients seeking care for non-COVID-19 reasons | 11.6%                                                | Mazzini et al   In house ELISA   IgG, IgM                                                        | 85.7%, 98.1% (Test developer / manufacturer evaluation)  | 10.7% (4.7-16.1%)                                |
| <b>Japan</b>                                                          |                          |                              |                  |                      |             |                                                                                                     |            |                 |                                                |                                                      |                                                                                                  |                                                          |                                                  |
| Oka (Tokyo National Hospital) <sup>185</sup>                          | 2020-06-01 to 2020-10-30 | Tokyo                        | Sublocal         | High                 | 93          | NR                                                                                                  | NR         | Non-probability | Patients seeking care for non-COVID-19 reasons | 0.0%                                                 | Roche Diagnostics   Elecsys Anti-SARS-CoV-2   IgG, IgM                                           | 0.8%, 1.0% (FINDDx / MUHC independent evaluation)        | -                                                |
| Matthews (Okinawa Institute of Science and Technology) <sup>186</sup> | 2020-08-01 to 2020-08-31 | Okinawa Prefecture   Okinawa | Sublocal         | High                 | 634         | 20-40 (n=124), 40-60 (n=74), 60+ (n=4)                                                              | NR         | Non-probability | Multiple populations                           | 0.0%                                                 | N/A - institution designed   N/A - institution designed   NR                                     | 92.5%, 100.0% (Test developer / manufacturer evaluation) | 0.1% (0.0-0.6%)                                  |
| Hibino (Medical Corporation Koshikai) <sup>187</sup>                  | 2020-05-26 to 2020-08-25 | Tokyo                        | Local            | High                 | 615         | NR                                                                                                  | NR         | Non-probability | Non-essential workers and unemployed persons   | 34.3%                                                | Aurora Biomed   COVID-19 IgG / IgM Rapid Test Cassette   IgG, IgM                                | 0.8%, 1.0% (FINDDx / MUHC independent evaluation)        | -                                                |
| Fukuda (Juntendo University) <sup>188</sup>                           | 2020-07-06 to 2020-08-21 | Kantō   Tokyo                | Sublocal         | Moderate             | 4147        | 20-29 (n=1461); 30-39 (n=1245); 40-49 (n=776); 50-59 (n=424); 60-69 (N=193); 70+ (n=48) Mean = 36.8 | 63.9       | Non-probability | Health care workers and caregivers             | 0.3% (0.2-0.6%)                                      | Roche Diagnostics   Elecsys Anti-SARS-CoV-2 electrochemiluminescence immunoassay   IgG, IgA, IgM | 0.6%, 1.0% (FINDDx / MUHC independent evaluation)        | -                                                |
| Hibino (Shonan Fujisawa Tokushukai Hospital) <sup>189</sup>           | 2020-06-01 to 2020-07-30 | Kanagawa   Fujisawa          | Sublocal         | Unclear              | 806         | Median 33 (Range 21-83)                                                                             | 71.6       | Non-probability | Health care workers and caregivers             | 0.7% (0.3-1.6%)                                      | Abbott   Abbott Architect SARS-CoV-2 IgG   IgG                                                   | 0.4%, 1.0% (FINDDx / MUHC independent evaluation)        | -                                                |
| Nishida (Toyonaka Municipal Hospital) <sup>192</sup>                  | 2020-06-12 to 2020-06-19 | Kansai   Osaka               | Sublocal         | Moderate             | 925         | Mean 40 (SD 11.8)                                                                                   | 80.0       | Non-probability | Health care workers and caregivers             | 0.4% (0.2-1.1%)                                      | Abbott   Abbott Architect SARS-CoV-2 IgG assay   IgG                                             | 0.4%, 1.0% (FINDDx / MUHC independent evaluation)        | -                                                |

| Article Author (Study Organization)                                         | Sampling Dates (YMD)     | Location                      | Geographic Scope | Overall Risk of Bias | Sample Size | Age                                                                       | Female (%) | Sampling method | Sample frame                                   | Uncorrected Seroprevalence (95% Confidence Interval) | Test Manufacturers   Names   Isotypes                                                   | Test Sens, Spec (Source)                                                             | Corrected Seroprevalence (95% Credible Interval) |
|-----------------------------------------------------------------------------|--------------------------|-------------------------------|------------------|----------------------|-------------|---------------------------------------------------------------------------|------------|-----------------|------------------------------------------------|------------------------------------------------------|-----------------------------------------------------------------------------------------|--------------------------------------------------------------------------------------|--------------------------------------------------|
| Chong (Kanenokuma Hospital) <sup>193</sup>                                  | 2020-06-12 to 2020-06-15 | Kyushu   Fukuoka City         | Sublocal         | High                 | 108         | NR                                                                        | NR         | Non-probability | Assisted living and long-term care facilities  | 2.8%                                                 | Hangzhou Alltest Biotech Co. Ltd.   All Test@2019-nCoV IgG/IgM RapidTest Cassette   IgG | 0.6%, 1.0% (FINDDx / MUHC independent evaluation)                                    | -                                                |
| Suda (Hokkaido University Graduate School of Medicine) <sup>194</sup>       | 2020-05-01 to 2020-05-31 | Hokkaido   Sapporo            | Sublocal         | High                 | 300         | Mean 66.5 (Range 20-84)                                                   | 42.0       | Non-probability | Patients seeking care for non-COVID-19 reasons | 0.0% (0.0-0.0%)                                      | Roche Diagnostics   Elecsys Anti-SARS-Cov2 Immunoassay   IgG                            | 0.8%, 1.0% (FINDDx / MUHC independent evaluation)                                    | -                                                |
| Nakamura (Iwate Prefectural Central Hospital) <sup>195</sup>                | 2020-05-18 to 2020-05-29 | Honshu   Morioka              | Sublocal         | High                 | 1000        | Mean 40 (SD 11)                                                           | 73.6       | Non-probability | Health care workers and caregivers             | 0.0%                                                 | Abbott Laboratories: Roche   Abbott Architect® SARS- CoV- 2 IgG Assay; Roche   IgG      | 97.8%, 97.8% (Used Bastos SR/MA data; no sens, spec, or author adjustment available) | 0.1% (0.0-0.3%)                                  |
| Kobashi (Hirata Central Hospital) <sup>196</sup>                            | 2020-05-08 to 2020-05-28 | Fukushima Prefecture   Hirata | Sublocal         | High                 | 637         | Median 44 (IQR 34, 56)                                                    | 75.8       | Non-probability | Health care workers and caregivers             | 0.9%                                                 | YHLO Biotech Shenzhen; China   iFlash-SARS-CoV-2 IgM/IgG   IgG                          | 1.0%, 0.0% (FINDDx / MUHC independent evaluation)                                    | -                                                |
| Denyer (SoftBank) <sup>198</sup>                                            | 2020-05-12 to 2020-05-18 |                               | Sublocal         | Unclear              | 44066       | NR                                                                        | NR         | Non-probability | Multiple populations                           | 0.4%                                                 | Innovita; "Zhejiang Orient Gene Biotech Co.; LTD"   NR   NR                             | No data                                                                              | -                                                |
| Fujita (National Hospital Organization Kyoto Medical Center) <sup>199</sup> | 2020-04-10 to 2020-04-20 | Kansai   Kyoto                | Sublocal         | High                 | 92          | 20-29 (n=30), 30-39 (n=29), 40-49 (n=21), 50+ (n=12)                      | 64.1       | Non-probability | Health care workers and caregivers             | 5.4%                                                 | Inc.; DRG international   COVID-19 IgG ELISA kits   IgG                                 | 0.8%, 1.0% (FINDDx / MUHC independent evaluation)                                    | -                                                |
| Suzuki (National Center for Global Health and Medicine) <sup>201</sup>      | 2020-02-14 to 2020-04-03 | Tokyo                         | Sublocal         | High                 | 49          | 20-29 (n = 5), 30-39 (n = 25), 40-49 (n = 11), 50-59 (n = 4), 60+ (n = 2) | 69.4       | Non-probability | Health care workers and caregivers             | 0.0%                                                 | N/A - in house   N/A - in house   IgG                                                   | No data                                                                              | -                                                |

| Article Author (Study Organization)                                   | Sampling Dates (YMD)     | Location             | Geographic Scope | Overall Risk of Bias | Sample Size | Age                    | Female (%) | Sampling method | Sample frame                                   | Uncorrected Seroprevalence (95% Confidence Interval) | Test Manufacturers   Names   Isotypes                                                                                                                                                                                                                             | Test Sens, Spec (Source)                                        | Corrected Seroprevalence (95% Credible Interval) |
|-----------------------------------------------------------------------|--------------------------|----------------------|------------------|----------------------|-------------|------------------------|------------|-----------------|------------------------------------------------|------------------------------------------------------|-------------------------------------------------------------------------------------------------------------------------------------------------------------------------------------------------------------------------------------------------------------------|-----------------------------------------------------------------|--------------------------------------------------|
| Suda (Hokkaido University Graduate School of Medicine) <sup>194</sup> | 2020-03-01 to 2020-03-31 | Hokkaido   Sapporo   | Sublocal         | High                 | 300         | Mean 68 (Range 20-80)  | 49.0       | Non-probability | Patients seeking care for non-COVID-19 reasons | 0.3% (0.0-1.8%)                                      | Roche Diagnostics   Elecsys Anti-SARS-CoV2 Immunoassay   IgG                                                                                                                                                                                                      | 0.8%, 1.0% (FINDDx / MUHC independent evaluation)               | -                                                |
| <b>Liechtenstein</b>                                                  |                          |                      |                  |                      |             |                        |            |                 |                                                |                                                      |                                                                                                                                                                                                                                                                   |                                                                 |                                                  |
| Schaffner (Kantonsspital Graubunden) <sup>202</sup>                   | 2020-06-02 to 2020-10-06 |                      | National         | Unclear              | 1159        | Median 45 (IQR 39-48)  | 53.6       | Non-probability | Multiple populations                           | 7.8% (6.4-9.5%)                                      | Switzerland Diasorin Euroimmun; Switzerland Abbott Diagnostics Baar; Rotkreuz; Roche Diagnostics   Elecsys®Anti-SARS-CoV-2 S antibody assay Abbott test Diasorin test Euroimmun test Sugentech, Daejeon, Republic of Korea; SGTi-flex COVID-19 IgM/IgG   IgG, IgM | 97.6%, 99.8% (Author-reported independent evaluation)           | 7.7% (6.2-9.5%)                                  |
| <b>New Zealand</b>                                                    |                          |                      |                  |                      |             |                        |            |                 |                                                |                                                      |                                                                                                                                                                                                                                                                   |                                                                 |                                                  |
| Craigie (Southern Community Laboratories) <sup>208</sup>              | 2020-06-04 to 2020-08-04 | Southern Region      | Regional         | High                 | 1127        | Median 46 (Range 4-90) | 76.0       | Non-probability | Contacts of COVID patients                     | 1.0%                                                 | Abbott   Abbott Architect SARS-CoV-2 IgG chemiluminescent microparticle immunoassay   IgG                                                                                                                                                                         | 0.4%, 1.0% (FINDDx / MUHC independent evaluation)               | -                                                |
| <b>Norway</b>                                                         |                          |                      |                  |                      |             |                        |            |                 |                                                |                                                      |                                                                                                                                                                                                                                                                   |                                                                 |                                                  |
| Trieu (University of Bergen) <sup>210</sup>                           | 2020-03-06 to 2020-04-09 | Midhordland   Bergen | Local            | High                 | 607         | Median 39 (SD 12.6)    | 77.1       | Non-probability | Health care workers and caregivers             | 5.3%                                                 | Sigma-Aldrich   In house ELISA test   IgG                                                                                                                                                                                                                         | 75.6%, 97.6% (Used Bastos SR/MA data; no sens, spec, or author) | 3.7% (1.2-6.5%)                                  |

| Article Author (Study Organization)                       | Sampling Dates (YMD)     | Location                | Geographic Scope | Overall Risk of Bias | Sample Size | Age                   | Female (%) | Sampling method | Sample frame                                 | Uncorrected Seroprevalence (95% Confidence Interval) | Test Manufacturers   Names   Isotypes                                        | Test Sens, Spec (Source)                                                             | Corrected Seroprevalence (95% Credible Interval) |
|-----------------------------------------------------------|--------------------------|-------------------------|------------------|----------------------|-------------|-----------------------|------------|-----------------|----------------------------------------------|------------------------------------------------------|------------------------------------------------------------------------------|--------------------------------------------------------------------------------------|--------------------------------------------------|
|                                                           |                          |                         |                  |                      |             |                       |            |                 |                                              |                                                      |                                                                              | adjustment available)                                                                |                                                  |
| Kuvelker (University of Bergen) <sup>211</sup>            | 2020-02-28 to 2020-04-04 | Hordaland   Bergen      | Local            | High                 | 179         | Median 30 (IQR 17-50) | 55.3       | Non-probability | Contacts of COVID patients                   | 45.3%                                                | N/A - Author Designed   N/A - Author Designed   IgG                          | 75.6%, 97.6% (Used Bastos SR/MA data; no sens, spec, or author adjustment available) | 58.6% (48.8-68.7%)                               |
| Cox (University of Bergen) <sup>212</sup>                 | 2020-02-28 to 2020-04-04 | Western Norway   Bergen | Local            | High                 | 77          | NR                    | NR         | Probability     | Contacts of COVID patients                   | 31.2%                                                | Amant et al.   N/A - Author-designed   IgG, IgA, IgM                         | 75.6%, 97.6% (Used Bastos SR/MA data; no sens, spec, or author adjustment available) | 39.7% (25.8-53.2%)                               |
| <b>Portugal</b>                                           |                          |                         |                  |                      |             |                       |            |                 |                                              |                                                      |                                                                              |                                                                                      |                                                  |
| Figueiredo-Campos (Universidade de Lisboa) <sup>213</sup> | 2020-05-13 to 2020-07-10 | Lisbon                  | Sublocal         | High                 | 2715        | NR                    | NR         | Non-probability | Non-essential workers and unemployed persons | 2.6%                                                 | N/A - author designed   N/A - author designed   IgG                          | 99.0%, 100.0% (Author-reported independent evaluation)                               | 2.2% (0.2-3.4%)                                  |
| Figueiredo-Campos (University of Lisbon) <sup>214</sup>   | 2020-05-13 to 2020-07-10 | Estremadura   Lisbon    | Sublocal         | Moderate             | 2571        | NR                    | NR         | Non-probability | Non-essential workers and unemployed persons | 1.5%                                                 | et al. [Independent third party]; Krammer   SARS-CoV-2 ELISA   IgG, IgA, IgM | 94.7%, 98.0% (Author-reported independent evaluation)                                | 0.5% (0.0-1.3%)                                  |
| Gonçalves (NOVA University of Lisbon) <sup>216</sup>      | 2020-06-15 to 2020-06-30 | Lisboa Region   Lisbon  | Sublocal         | Moderate             | 1636        | 17-76                 | 65.9       | Non-probability | Non-essential workers and unemployed persons | 3.0%                                                 | NOVA University of Lisbon   In-House ELISA anti-SARS-CoV-2 assay   IgG       | 94.7%, 99.5% (Test developer / manufacturer evaluation)                              | 2.0% (0.2-3.5%)                                  |
| <b>Republic of Korea</b>                                  |                          |                         |                  |                      |             |                       |            |                 |                                              |                                                      |                                                                              |                                                                                      |                                                  |
| KBS World (Korea Disease Control and                      | 2020-08-15 to 2020-10-15 |                         | National         | Unclear              | 6900        | NR                    | 0.0        | Non-probability | Essential non-healthcare workers             | 0.4%                                                 | NR   NR   NR                                                                 | No data                                                                              | -                                                |

| Article Author (Study Organization)                                       | Sampling Dates (YMD)     | Location                 | Geographic Scope | Overall Risk of Bias | Sample Size | Age                     | Female (%) | Sampling method | Sample frame                       | Uncorrected Seroprevalence (95% Confidence Interval) | Test Manufacturers   Names   Isotypes                                                                                 | Test Sens, Spec (Source)                                 | Corrected Seroprevalence (95% Credible Interval) |
|---------------------------------------------------------------------------|--------------------------|--------------------------|------------------|----------------------|-------------|-------------------------|------------|-----------------|------------------------------------|------------------------------------------------------|-----------------------------------------------------------------------------------------------------------------------|----------------------------------------------------------|--------------------------------------------------|
| Prevention Agency) <sup>217</sup>                                         |                          |                          |                  |                      |             |                         |            |                 |                                    |                                                      |                                                                                                                       |                                                          |                                                  |
| Song (Daegu Catholic University Hospital) <sup>219</sup>                  | 2020-05-25 to 2020-06-05 | North Gyeongsang   Daegu | Local            | High                 | 198         | Mean 51.7 (Range 18-82) | 50.0       | Non-probability | Multiple populations               | 7.6%                                                 | Shin Jin Medics Inc   DIAKEY COVID-19 IgM/IgG Rapid Test Kit   IgG                                                    | 100.0%, 92.0% (Author-reported independent evaluation)   | 2.3% (0.0-6.6%)                                  |
| Ko (Sungkyunkwan University School of Medicine) <sup>221</sup>            | 2020-04-26 to 2020-05-09 |                          | National         | High                 | 309         | Mean 31.1 (SD 7.84)     | 84.5       | Non-probability | Health care workers and caregivers | 0.3%                                                 | PCL Inc   PCL COVID-19 Total Ab EIA test   NR                                                                         | 98.2%, 100.0% (Test developer / manufacturer evaluation) | 0.2% (0.0-1.0%)                                  |
| Ko (Sungkyunkwan University School of Medicine) <sup>221</sup>            | 2020-04-26 to 2020-05-09 |                          | National         | High                 | 123         | Mean 34.9 (SD 10.9)     | 75.6       | Non-probability | Health care workers and caregivers | 0.0%                                                 | PCL Inc   PCL COVID-19 Total Ab EIA test   NR                                                                         | 98.2%, 100.0% (Test developer / manufacturer evaluation) | 0.6% (0.0-2.5%)                                  |
| <b>Singapore</b>                                                          |                          |                          |                  |                      |             |                         |            |                 |                                    |                                                      |                                                                                                                       |                                                          |                                                  |
| Kurohi (Singapore National Centre for Infectious Diseases) <sup>222</sup> | 2020-02-15 to 2020-04-15 | Singapore                | Sublocal         | Unclear              | 1096        | NR                      | NR         | Non-probability | Health care workers and caregivers | 0.0%                                                 | NR   NR   NR                                                                                                          | No data                                                  | -                                                |
| Ng (National Centre for Infectious Diseases, Singapore) <sup>223</sup>    | 2020-01-23 to 2020-04-03 |                          | National         | Moderate             | 1150        | Median 35 (IQR 26-51)   | 54.2       | Probability     | Contacts of COVID patients         | 3.8%                                                 | N/A - author designed   N/A - author designed   NR                                                                    | 98.9%, 100.0% (Test developer / manufacturer evaluation) | 3.1% (0.5-4.9%)                                  |
| <b>Spain</b>                                                              |                          |                          |                  |                      |             |                         |            |                 |                                    |                                                      |                                                                                                                       |                                                          |                                                  |
| Savirón-Cornudella (University of Zaragoza) <sup>224</sup>                | 2020-03-31 to 2020-08-31 | Madrid                   | Sublocal         | High                 | 260         | NR                      | 100.0      | Non-probability | Pregnant or parturient women       | 6.9%                                                 | Vircell; Abbott; Biozek   Biozek COVID-19 IgG/IgM Rapid Test Cassette IgG Abbott reactive Vircell reactive   IgG, IgM | No data                                                  | -                                                |

| Article Author (Study Organization)                                                | Sampling Dates (YMD)     | Location                                | Geographic Scope | Overall Risk of Bias | Sample Size | Age                                                                                             | Female (%) | Sampling method | Sample frame                                   | Uncorrected Seroprevalence (95% Confidence Interval) | Test Manufacturers   Names   Isotypes                                                                 | Test Sens, Spec (Source)                                                             | Corrected Seroprevalence (95% Credible Interval) |
|------------------------------------------------------------------------------------|--------------------------|-----------------------------------------|------------------|----------------------|-------------|-------------------------------------------------------------------------------------------------|------------|-----------------|------------------------------------------------|------------------------------------------------------|-------------------------------------------------------------------------------------------------------|--------------------------------------------------------------------------------------|--------------------------------------------------|
| Garde-Noguera (Hospital Arnau de Vilanova de Valencia, Spain) <sup>225</sup>       | 2020-05-02 to 2020-06-30 | Valencia   Valencia                     | Local            | High                 | 166         | Median 63 (Range 33-86)                                                                         | 42.2       | Non-probability | Patients seeking care for non-COVID-19 reasons | 1.8%                                                 | DiaSorin   LIASON SARS-CoV-2 S1/S2IgG test and LIASON SARS-CoV-2 IgM test   IgG, IgM                  | 75.6%, 97.6% (Used Bastos SR/MA data; no sens, spec, or author adjustment available) | 0.9% (0.0-3.4%)                                  |
| Prados (IVIRMA Global Headquarters) <sup>26</sup>                                  | 2020-04-27 to 2020-06-26 |                                         | National         | Unclear              | 6140        | NR                                                                                              | 72.8       | Non-probability | Patients seeking care for non-COVID-19 reasons | 0.7%                                                 | Epitope Diagnostics   EDI Novel Coronavirus COVID-19 ELISA kit   IgM                                  | 0.6%, 1.0% (FINDDx / MUHC independent evaluation)                                    | -                                                |
| Cabezón-Gutiérrez (Hospital General Universitario Gregorio Marañón) <sup>227</sup> | 2020-06-01 to 2020-06-19 | Community of Madrid   Torrejón de Ardoz | Sublocal         | High                 | 229         | <50 (n=35); 51-70 (n=122); >70 (n=72)                                                           | 54.1       | Non-probability | Patients seeking care for non-COVID-19 reasons | 31.4%                                                | Hangzhou Testsea Biotechnology   Testsealabs IgG/IgM Rapid Test Cassette   IgG, IgM                   | 0.8%, 0.9% (FINDDx / MUHC independent evaluation)                                    | -                                                |
| Camba (Quirónsalud Tenerife Hospital) <sup>228</sup>                               | 2020-04-27 to 2020-06-15 | Canary Islands   Tenerife               | Sublocal         | High                 | 211         | Median 53.9 (NR)                                                                                | 55.9       | Non-probability | Patients seeking care for non-COVID-19 reasons | 1.9% (0.1-4.8%)                                      | Roche Diagnostics; Unclear   Elecsys Anti-SARS-CoV-2, solid phase immunochromatographic analysis   NR | 97.8%, 97.8% (Used Bastos SR/MA data; no sens, spec, or author adjustment available) | 0.8% (0.0-2.7%)                                  |
| Brotos (University Hospital Sant Joan de Deu) <sup>229</sup>                       | 2020-04-28 to 2020-06-03 | Catalonia   Barcelona                   | Local            | Moderate             | 1084        | Mean Children 5.9; Adults 40 (SD Children 3.7; adults 10.2)                                     | 45.4       | Non-probability | Contacts of COVID patients                     | 18.0%                                                | Innovita Tangshan Biological Technology Co   2019-n-CoV Ab Test   IgG, IgM                            | 0.6%, 1.0% (FINDDx / MUHC independent evaluation)                                    | -                                                |
| Perez-Garcia (Hospital Universitario Príncipe de Asturias) <sup>231</sup>          | 2020-05-01 to 2020-05-30 | Madrid                                  | Sublocal         | High                 | 2424        | Median 42.6 (HCW without evidence of infection); 50.0 (HCW symptomatic with positive serology); | 80.4       | Non-probability | Health care workers and caregivers             | 22.4%                                                | AllTest Biotech   AllTest COVID-19 IgG/IgM kit   IgG, IgM                                             | 0.6%, 1.0% (FINDDx / MUHC independent evaluation)                                    | -                                                |



| Article Author (Study Organization)                                | Sampling Dates (YMD)     | Location            | Geographic Scope | Overall Risk of Bias | Sample Size | Age                                                                                                                                                                                                         | Female (%) | Sampling method | Sample frame                       | Uncorrected Seroprevalence (95% Confidence Interval) | Test Manufacturers   Names   Isotypes                                                                                                                                                | Test Sens, Spec (Source)                                                             | Corrected Seroprevalence (95% Credible Interval) |
|--------------------------------------------------------------------|--------------------------|---------------------|------------------|----------------------|-------------|-------------------------------------------------------------------------------------------------------------------------------------------------------------------------------------------------------------|------------|-----------------|------------------------------------|------------------------------------------------------|--------------------------------------------------------------------------------------------------------------------------------------------------------------------------------------|--------------------------------------------------------------------------------------|--------------------------------------------------|
|                                                                    |                          |                     |                  |                      |             | 38.6 (HCW asymptomatic with positive serology) (IQR 29.9-54.8 (HCW without evidence of infection); 36.9-57.3 (HCW symptomatic with positive serology); 28.5-52.1 (HCW asymptomatic with positive serology)) |            |                 |                                    |                                                      |                                                                                                                                                                                      |                                                                                      |                                                  |
| Fabre (Hospital Clínico Universitario Lozano Blesa) <sup>232</sup> | 2020-04-27 to 2020-05-29 | Zaragoza   Zaragoza | Sublocal         | High                 | 169         | NR                                                                                                                                                                                                          | 100.0      | Non-probability | Pregnant or parturient women       | 8.3%                                                 | Abbott; Guangzhou Wondfo Biotech Co.; Vircell Microbiologists   Wondfo SARS-CoV-2 Antibody Test, IgG-CMIA; Abbott SARS-CoV-2 IgG Assay; Vircell COVID-19 VIRCLIA IgM/IgA,   IgG, IgM | 66.0%, 96.6% (Used Bastos SR/MA data; no sens, spec, or author adjustment available) | 7.3% (1.1-14.0%)                                 |
| Barallat (Institut Català de la Salut) <sup>233</sup>              | 2020-05-04 to 2020-05-22 | Barcelona           | Local            | High                 | 7563        | Mean 43.8 (SD 12.43)                                                                                                                                                                                        | 76.0       | Non-probability | Health care workers and caregivers | 9.4%                                                 | Italy; DiaSorin; Vercelli   SARS-CoV-2 S1/S2 IgG LIAISON®   IgG                                                                                                                      | 0.8%, 1.0% (FINDDx / MUHC independent evaluation)                                    | -                                                |
| Viñuela (University Hospital Gregorio Marañón) <sup>234</sup>      | 2020-05-06 to 2020-05-21 | Madrid              | Local            | High                 | 100         | Median 32 (Range 16-44)                                                                                                                                                                                     | 100.0      | Non-probability | Pregnant or parturient women       | 13.0%                                                | Abbott   Abbott Architect SARS-CoV-2 IgG assay   IgG                                                                                                                                 | 0.4%, 1.0% (FINDDx / MUHC independent evaluation)                                    | -                                                |

| Article Author (Study Organization)                                       | Sampling Dates (YMD)     | Location                     | Geographic Scope | Overall Risk of Bias | Sample Size | Age                          | Female (%) | Sampling method | Sample frame                       | Uncorrected Seroprevalence (95% Confidence Interval) | Test Manufacturers   Names   Isotypes                                                        | Test Sens, Spec (Source)                                                             | Corrected Seroprevalence (95% Credible Interval) |
|---------------------------------------------------------------------------|--------------------------|------------------------------|------------------|----------------------|-------------|------------------------------|------------|-----------------|------------------------------------|------------------------------------------------------|----------------------------------------------------------------------------------------------|--------------------------------------------------------------------------------------|--------------------------------------------------|
| Soriano ( Universidad Autónoma de Madrid) <sup>235</sup>                  | 2020-04-26 to 2020-05-16 | Community of Madrid   Madrid | Local            | High                 | 674         | Median 42 (Range 18-89)      | 70.2       | Non-probability | Multiple populations               | 13.8%                                                | PCL Inc.   PCL COVID19 IgG/IgM Rapid Gold   IgG, IgM                                         | 0.9%, 1.0% (FINDDx / MUHC independent evaluation)                                    | -                                                |
| Villalan (The Universidad Complutense de Madrid) <sup>237</sup>           | 2020-02-28 to 2020-05-10 | Madrid                       | Sublocal         | Moderate             | 769         | Median 32 (IQR 11)           | 100.0      | Non-probability | Pregnant or parturient women       | 11.2%                                                | NR   NR   IgG                                                                                | 75.6%, 97.6% (Used Bastos SR/MA data; no sens, spec, or author adjustment available) | 12.0% (8.8-15.3%)                                |
| Gras-Valentí (COVID-19 Group of the Infections Commission) <sup>238</sup> | 2020-04-24 to 2020-05-08 | Alacant   Alicante           | Sublocal         | Unclear              | 4179        | NR                           | 73.3       | Non-probability | Health care workers and caregivers | 6.6% (5.8-7.3%)                                      | NR   NR   IgG                                                                                | 75.6%, 97.6% (Used Bastos SR/MA data; no sens, spec, or author adjustment available) | 5.6% (3.9-7.1%)                                  |
| Crovetto (Universitat de Barcelona) <sup>239</sup>                        | 2020-04-14 to 2020-05-05 | Barcelona                    | Sublocal         | High                 | 874         | NR                           | 100.0      | Non-probability | Pregnant or parturient women       | 14.0%                                                | Ortho Clinical Diagnostics; Vircell Microbiologist   VIRCLIA, VITROS (Ortho)   IgG, IgA, IgM | No data                                                                              | -                                                |
| Valdivia (Hospital Clínico Universitario) <sup>240</sup>                  | 2020-04-13 to 2020-04-30 | Valencia   Valencia          | Local            | High                 | 1153        | NR                           | NR         | Non-probability | Health care workers and caregivers | 3.5%                                                 | Snibe Diagnostic   MAGLUMI 2019-nCov IgG/IgM CLIA   IgG, IgM                                 | 95.6%, 96.0% (Test developer / manufacturer evaluation)                              | 0.9% (0.0-2.6%)                                  |
| Galán (Hospital Universitario Fundación Alcorcón) <sup>241</sup>          | 2020-04-14 to 2020-04-27 | Madrid                       | Sublocal         | High                 | 2590        | Mean 43.8 (SD 11.1)          | 73.9       | Non-probability | Health care workers and caregivers | 31.6%                                                | Palex   Diapro   IgG                                                                         | 88.9%, 91.8% (Author-reported independent evaluation)                                | 26.9% (16.9-35.2%)                               |
| Olalla ( Hospital Costa del Sol) <sup>242</sup>                           | 2020-04-15 to 2020-04-25 | Marbella                     | Sublocal         | High                 | 498         | Mean 41.5 (95% CI 40.8-42.3) | 71.1       | Non-probability | Health care workers and caregivers | 2.2%                                                 | "Zhejiang Orient Gene Biotech Co.; LTD"   COVID-19 IgG/IgM Rapid Test   IgG, IgM             | 0.4%, 1.0% (FINDDx / MUHC independent evaluation)                                    | -                                                |

| Article Author (Study Organization)                                                       | Sampling Dates (YMD)     | Location                         | Geographic Scope | Overall Risk of Bias | Sample Size | Age                     | Female (%) | Sampling method | Sample frame                                   | Uncorrected Seroprevalence (95% Confidence Interval) | Test Manufacturers   Names   Isotypes                                                            | Test Sens, Spec (Source)                                 | Corrected Seroprevalence (95% Credible Interval) |
|-------------------------------------------------------------------------------------------|--------------------------|----------------------------------|------------------|----------------------|-------------|-------------------------|------------|-----------------|------------------------------------------------|------------------------------------------------------|--------------------------------------------------------------------------------------------------|----------------------------------------------------------|--------------------------------------------------|
| Borraz (Hospital San Juan de Dios) <sup>244</sup>                                         | 2020-03-20 to 2020-04-21 | Aragon   Zaragoza                | Sublocal         | High                 | 289         | Median 41.9 (SD 12.7)   | 77.2       | Non-probability | Health care workers and caregivers             | 5.9%                                                 | Madrid; Master Labor S.L.   2019-nCoV IgG/IgM Rapid Test   IgG, IgM                              | 100.0%, 98.0% (Test developer / manufacturer evaluation) | 3.1% (0.0-6.2%)                                  |
| Borraz (Hospital San Juan de Dios) <sup>244</sup>                                         | 2020-03-20 to 2020-04-21 | Aragon   Zaragoza                | Sublocal         | High                 | 229         | Median 74.4 (SD 13.9)   | 43.2       | Non-probability | Patients seeking care for non-COVID-19 reasons | 7.0%                                                 | Madrid; Master Labor S.L.   2019-nCoV IgG/IgM Rapid Test   IgG, IgM                              | 100.0%, 98.0% (Test developer / manufacturer evaluation) | 4.4% (0.4-8.7%)                                  |
| Dacosta-Urbieta (Hospital Clinico Universitario de Santiago de Compostela) <sup>245</sup> | 2020-04-14 to 2020-04-16 | Galicia   Santiago de Compostela | Sublocal         | High                 | 175         | NR                      | NR         | Non-probability | Health care workers and caregivers             | 4.0% (1.1-6.9%)                                      | Genobio Pharmaceutical (Shanghai; China)   Virusee Immunochromatographic Rapid Method   IgG, IgM | No data                                                  | -                                                |
| Martin (Gerencia de Atención Primaria del Área de Salud de León, Spain) <sup>246</sup>    | 2020-04-01 to 2020-04-15 | León   León                      | Local            | High                 | 676         | Mean 48.5 (SD 12.8)     | 74.1       | Non-probability | Health care workers and caregivers             | 7.4% (5.5-10.0%)                                     | Hangzhou All Test Biotech Co Ltd   All Test@2019-nCoV IgG/IgM RapidTest Cassette   IgG, IgM      | 0.0%, 0.0% (Used author-adjusted estimate)               | 7.4% (5.6-9.6%)                                  |
| Fernandez (Hospital Universitario de Fuenlabrada) <sup>247</sup>                          | 2020-05-13 to 2020-04-14 | Fuenlabrada                      | Sublocal         | High                 | 2439        | Mean 42.1 (Range 18-65) | 78.4       | Non-probability | Health care workers and caregivers             | 16.9%                                                | Snibe diagnostic   Maglumi 2000   IgG                                                            | 0.9%, 1.0% (FINDDx / MUHC independent evaluation)        | -                                                |
| <b>Sweden</b>                                                                             |                          |                                  |                  |                      |             |                         |            |                 |                                                |                                                      |                                                                                                  |                                                          |                                                  |
| Dopico (Karolinska Institutet) <sup>248</sup>                                             | 2020-03-14 to 2020-12-11 | Uppland   Stockholm              | Local            | High                 | 4100        | NR                      | NR         | Probability     | Multiple populations                           | 14.8% (12.2-18.0%)                                   | NR - In-house   Anti-SARS-CoV-2 ELISA   IgG                                                      | 0.0%, 0.0% (Used author-adjusted estimate)               | 14.8% (13.7-15.9%)                               |
| Rashid-Abdi (The Hospital of Vastmanland) <sup>249</sup>                                  | 2020-05-04 to 2020-08-19 | Vasteras                         | Sublocal         | High                 | 131         | Mean 39 (SD 12)         | 84.0       | Non-probability | Health care workers and caregivers             | 19.1%                                                | Abbott   Abbott's SARS-CoV-2 IgG immunoassay,   IgG                                              | 0.4%, 1.0% (FINDDx / MUHC independent evaluation)        | -                                                |

| Article Author (Study Organization)                    | Sampling Dates (YMD)     | Location                 | Geographic Scope | Overall Risk of Bias | Sample Size | Age                                                                                          | Female (%) | Sampling method | Sample frame                                  | Uncorrected Seroprevalence (95% Confidence Interval) | Test Manufacturers   Names   Isotypes                                                                                              | Test Sens, Spec (Source)                                                             | Corrected Seroprevalence (95% Credible Interval) |
|--------------------------------------------------------|--------------------------|--------------------------|------------------|----------------------|-------------|----------------------------------------------------------------------------------------------|------------|-----------------|-----------------------------------------------|------------------------------------------------------|------------------------------------------------------------------------------------------------------------------------------------|--------------------------------------------------------------------------------------|--------------------------------------------------|
| Laursen (Copenhagen University Hospital) <sup>59</sup> | 2020-06-22 to 2020-08-10 |                          | National         | High                 | 1248        | <40 (n=374); 40-60 (n=687); 60+ (n=187)                                                      | 67.1       | Non-probability | Health care workers and caregivers            | 8.3%                                                 | Zhuhai; China; Guangzhou Wondfo Biotech; Livzon Diagnostics; Gunangdong   Livzon lateral flow test, WONDFO lateral flow   IgG, IgM | 66.0%, 96.6% (Used Bastos SR/MA data; no sens, spec, or author adjustment available) | 7.8% (5.2-10.5%)                                 |
| Lidström (Uppsala University) <sup>252</sup>           | 2020-05-27 to 2020-06-25 | Uppsala                  | Regional         | Moderate             | 8679        | Mean 45 (IgG negative); 42 (IgG positive) (Range 18-85 (IgG negative); 18-78 (IgG positive)) | 76.7       | Probability     | Health care workers and caregivers            | 6.6%                                                 | Abbott   Abbott Architect SARS-CoV-2 IgG assay   IgG                                                                               | 0.4%, 1.0% (FINDDx / MUHC independent evaluation)                                    | -                                                |
| Hassan (Karolinska University Hospital) <sup>254</sup> | 2020-05-11 to 2020-06-17 | Stockholm                | Sublocal         | High                 | 403         | Median 43 (NR)                                                                               | 52.9       | Non-probability | Assisted living and long-term care facilities | 20.1%                                                | (Luminex Corp)   FlexMap3D   IgG                                                                                                   | 99.2%, 99.8% (Author-reported independent evaluation)                                | 20.1% (16.2-24.1%)                               |
| Rudberg (Danderyd Hospital) <sup>257</sup>             | 2020-04-14 to 2020-05-08 | Sodermanland   Stockholm | Sublocal         | Moderate             | 2149        | Mean 44 (SD 12)                                                                              | 84.5       | Non-probability | Health care workers and caregivers            | 19.1%                                                | Author designed   Author designed   IgG                                                                                            | 99.2%, 99.8% (Test developer / manufacturer evaluation)                              | 19.0% (17.2-20.8%)                               |
| Lindh (Uppsala University) <sup>258</sup>              | 2020-04-01 to 2020-04-20 | Stockholm                | Local            | High                 | 1005        | 36-50 (n=133/332); 51-65 (n=116/332)                                                         | 24.3       | Non-probability | Health care workers and caregivers            | 22.9% (20.4-25.7%)                                   | Zhejiang Orient Gene Biotech Co Ltd   COVID-19 IgG / IgM Rapid Test Cassette   IgG, IgM                                            | 0.4%, 1.0% (FINDDx / MUHC independent evaluation)                                    | -                                                |
| <b>Switzerland</b>                                     |                          |                          |                  |                      |             |                                                                                              |            |                 |                                               |                                                      |                                                                                                                                    |                                                                                      |                                                  |
| Kahlert (Cantonal Hospital St Gallen) <sup>261</sup>   | 2020-06-22 to 2020-08-15 | Canton of St. Gallen     | Regional         | Moderate             | 4664        | Median 38.3 (IQR 29.7-49.5)                                                                  | 78.3       | Non-probability | Health care workers and caregivers            | 3.0%                                                 | Switzerland ELISA: Euroimmune; Rotkreuz; ECLIA: Roche Diagnostics;                                                                 | No data                                                                              | -                                                |

| Article Author (Study Organization)                                              | Sampling Dates (YMD)     | Location                | Geographic Scope | Overall Risk of Bias | Sample Size | Age                           | Female (%) | Sampling method | Sample frame                       | Uncorrected Seroprevalence (95% Confidence Interval) | Test Manufacturers   Names   Isotypes                                                                                                                                                                   | Test Sens, Spec (Source)                                | Corrected Seroprevalence (95% Credible Interval) |
|----------------------------------------------------------------------------------|--------------------------|-------------------------|------------------|----------------------|-------------|-------------------------------|------------|-----------------|------------------------------------|------------------------------------------------------|---------------------------------------------------------------------------------------------------------------------------------------------------------------------------------------------------------|---------------------------------------------------------|--------------------------------------------------|
|                                                                                  |                          |                         |                  |                      |             |                               |            |                 |                                    |                                                      | Germany   electrochemiluminescence immunoassay (ECLIA) and Enzyme-linked Immunosorbent Assay (ELISA)   IgG, IgA                                                                                         |                                                         |                                                  |
| Fenwick (Lausanne University Hospital and University of Lausanne) <sup>267</sup> | 2020-05-04 to 2020-06-27 | Vaud                    | Regional         | High                 | 177         | NR                            | NR         | Non-probability | Contacts of COVID patients         | 32.2%                                                | Roche   Elecsys anti-SARS-CoV-2 assay   NR                                                                                                                                                              | 0.9%, 1.0% (FINDDx / MUHC independent evaluation)       | -                                                |
| Dupraz (University of Lausanne) <sup>268</sup>                                   | 2020-05-04 to 2020-06-27 | Vaud                    | Regional         | Moderate             | 69          | Mean 47.8 (SD 17)             | 56.5       | Probability     | Contacts of COVID patients         | 17.4%                                                | Switzerland; Lausanne University Hospital   in-house Luminex S protein trimer IgG Assay   IgG                                                                                                           | 96.7%, 99.2% (Test developer / manufacturer evaluation) | 17.2% (7.3-28.0%)                                |
| Dupraz (University of Lausanne) <sup>268</sup>                                   | 2020-05-04 to 2020-06-27 | Vaud                    | Regional         | Moderate             | 302         | Mean 37 (SD 21.3)             | 51.7       | Probability     | Contacts of COVID patients         | 53.0%                                                | Switzerland; Lausanne University Hospital   in-house Luminex S protein trimer IgG Assay   IgG                                                                                                           | 96.7%, 99.2% (Test developer / manufacturer evaluation) | 55.3% (47.2-64.0%)                               |
| Kohler (Cantonal Hospital St. Gallen) <sup>270</sup>                             | 2020-03-19 to 2020-04-03 | St. Gallen   St. Gallen | Regional         | High                 | 1012        | Median 38.3 (Range 16.9-64.8) | 75.2       | Non-probability | Health care workers and caregivers | 1.0%                                                 | Daejeon; Basel; Yuseong-gu; IL); a chemiluminescence microparticle immunoassay (CMIA; Roche Diagnostics; and an electrochemiluminescence immunoassay (ECLIA; Sugentech; Abbott Diagnostics; Lake Bluff; | No data                                                 | -                                                |

| Article Author (Study Organization)                              | Sampling Dates (YMD)     | Location                                      | Geographic Scope | Overall Risk of Bias | Sample Size | Age                      | Female (%) | Sampling method | Sample frame                       | Uncorrected Seroprevalence (95% Confidence Interval) | Test Manufacturers   Names   Isotypes                                                                                                         | Test Sens, Spec (Source)                                | Corrected Seroprevalence (95% Credible Interval) |
|------------------------------------------------------------------|--------------------------|-----------------------------------------------|------------------|----------------------|-------------|--------------------------|------------|-----------------|------------------------------------|------------------------------------------------------|-----------------------------------------------------------------------------------------------------------------------------------------------|---------------------------------------------------------|--------------------------------------------------|
|                                                                  |                          |                                               |                  |                      |             |                          |            |                 |                                    |                                                      | lateral flow immunochromatographic assay (LFIA; Switzerland); Republic of Korea)   NR   IgG                                                   |                                                         |                                                  |
| <b>The United Kingdom</b>                                        |                          |                                               |                  |                      |             |                          |            |                 |                                    |                                                      |                                                                                                                                               |                                                         |                                                  |
| Taubel (Richmond Pharmacology Ltd) <sup>273</sup>                | 2020-03-19 to 2020-12-02 | England   London                              | Local            | High                 | 6061        | 3-89                     | 11.3       | Non-probability | Multiple populations               | 6.4%                                                 | NR   NR   IgG                                                                                                                                 | No data                                                 | -                                                |
| Lumley (Oxford University Hospitals) <sup>274</sup>              | 2020-04-23 to 2020-11-30 |                                               | Local            | Moderate             | 12541       | Median 38 (IQR 29 to 49) | 73.9       | Probability     | Health care workers and caregivers | 10.1%                                                | University of Oxford   N/A - Author Designed   IgG                                                                                            | 99.1%, 99.0% (Test developer / manufacturer evaluation) | 8.7% (4.7-11.2%)                                 |
| Abo-Leyah (Ninewells Hospital and Medical School) <sup>280</sup> | 2020-05-28 to 2020-09-02 | Scotland                                      | Regional         | High                 | 2062        | Mean 44.8 (NR)           | 81.7       | Non-probability | Health care workers and caregivers | 14.5%                                                | Siemens   Siemens SARS-CoV-2 antibody assay   NR                                                                                              | 0.9%, 1.0% (FINDDx / MUHC independent evaluation)       | -                                                |
| Harris (Public Health England) <sup>283</sup>                    | 2020-03-23 to 2020-08-20 |                                               | Sublocal         | Moderate             | 2247        | NR                       | NR         | Non-probability | Health care workers and caregivers | 12.1%                                                | Euroimmun   Euroimmun anti-SARS-CoV-2 ELISA (IgG) serology assay   IgG                                                                        | 0.6%, 0.9% (FINDDx / MUHC independent evaluation)       | -                                                |
| Roarty (Queens University Belfast) <sup>284</sup>                | 2020-06-26 to 2020-08-15 | Belfast, London, Glasgow, Manchester, Cardiff | National         | Moderate             | 849         | 2-15                     | NR         | Non-probability | Family of essential workers        | 7.7% (6.0-9.6%)                                      | Basel; Switzerland; DiaSorin; Roche; Saluggia; Italy   Elecsys ANti-SARS-CoV-2 Total Antibody assay; LIAISON SARS-CoV-2 S1/S2 IgG assay   IgG | No data                                                 | -                                                |

| Article Author (Study Organization)                                         | Sampling Dates (YMD)     | Location                                                                          | Geographic Scope | Overall Risk of Bias | Sample Size | Age                            | Female (%) | Sampling method | Sample frame                                   | Uncorrected Seroprevalence (95% Confidence Interval) | Test Manufacturers   Names   Isotypes                                                  | Test Sens, Spec (Source)                               | Corrected Seroprevalence (95% Credible Interval) |
|-----------------------------------------------------------------------------|--------------------------|-----------------------------------------------------------------------------------|------------------|----------------------|-------------|--------------------------------|------------|-----------------|------------------------------------------------|------------------------------------------------------|----------------------------------------------------------------------------------------|--------------------------------------------------------|--------------------------------------------------|
| Cooper (Cambridge University Hospitals NHS Foundation Trust) <sup>286</sup> | 2020-06-10 to 2020-08-07 | England   Cambridge                                                               | Sublocal         | Moderate             | 5698        | Median 38 (Range 17-83)        | 77.3       | Non-probability | Health care workers and caregivers             | 7.2%                                                 | Siemens Healthcare Limited   Centaur XP SARS-Cov-2 Total Antibody assay   NR           | 0.9%, 1.0% (FINDDx / MUHC independent evaluation)      | -                                                |
| Black (University Hospitals of Leicester NHS Trust) <sup>287</sup>          | 2020-05-29 to 2020-08-03 | England   Leicester                                                               | Sublocal         | High                 | 200         | Mean 45.3 (SD 12)              | 75.0       | Non-probability | Health care workers and caregivers             | 12.0%                                                | Abbott Laboratories   Abbott SARS CoV-2 assay   IgG                                    | 0.4%, 1.0% (FINDDx / MUHC independent evaluation)      | -                                                |
| Claudiani (Imperial College London) <sup>289</sup>                          | 2020-06-01 to 2020-07-27 | England   London                                                                  | Sublocal         | High                 | 161         | Median 54 (Range 18-92)        | 41.6       | Non-probability | Patients seeking care for non-COVID-19 reasons | 11.2%                                                | Imperial College London   Imperial Hybrid DABA   NR                                    | No data                                                | -                                                |
| Martin (University of Leicester) <sup>291</sup>                             | 2020-05-29 to 2020-07-13 | East Midlands   Leicester                                                         | Sublocal         | Moderate             | 10662       | Median 44 (IQR 33-53)          | 79.8       | Non-probability | Health care workers and caregivers             | 10.8%                                                | Abbott   Abbott SARS-CoV-2 IgG assay   IgG                                             | 0.4%, 1.0% (FINDDx / MUHC independent evaluation)      | -                                                |
| Hanrath (Newcastle-upon-Tyne Hospitals NHS Trust) <sup>292</sup>            | 2020-05-29 to 2020-07-06 | England   Newcastle-Upon-Tyne                                                     | Sublocal         | High                 | 11103       | Median 43 (IQR 32-53)          | 77.0       | Non-probability | Health care workers and caregivers             | 8.4%                                                 | Roche Diagnostics   Roche Anti-SARS-CoV-2 serology assay   IgG                         | No data                                                | -                                                |
| Predecki (Imperial College London) <sup>293</sup>                           | 2020-06-01 to 2020-07-03 | Greater London   London                                                           | Sublocal         | High                 | 855         | Median 57 (Range 45-77)        | 34.7       | Non-probability | Patients seeking care for non-COVID-19 reasons | 8.1% (6.4-10.1%)                                     | Abbott   Abbott Architect SARS-CoV-2 IgG assay   IgG                                   | 68.4%, 100.0% (Author-reported independent evaluation) | 10.0% (2.1-16.0%)                                |
| Waterfield (Royal Belfast Hospital for Sick Children) <sup>294</sup>        | 2020-04-16 to 2020-07-03 | Wales, England, Scotland, Ireland   Belfast, London, Glasgow, Manchester, Cardiff | National         | High                 | 992         | Median 10.1 (Range 2.03-15.99) | 48.7       | Non-probability | Family of essential workers                    | 3.1%                                                 | DiaSorin   - Spike protein assays (DiaSorin LIAISON SARS CoV-2 S1/ S2 IgG assay)   IgG | 0.8%, 1.0% (FINDDx / MUHC independent evaluation)      | -                                                |

| Article Author (Study Organization)             | Sampling Dates (YMD)     | Location                                                 | Geographic Scope | Overall Risk of Bias | Sample Size | Age                                                                                              | Female (%) | Sampling method | Sample frame                                  | Uncorrected Seroprevalence (95% Confidence Interval) | Test Manufacturers   Names   Isotypes                                                                                                                      | Test Sens, Spec (Source)                                                             | Corrected Seroprevalence (95% Credible Interval) |
|-------------------------------------------------|--------------------------|----------------------------------------------------------|------------------|----------------------|-------------|--------------------------------------------------------------------------------------------------|------------|-----------------|-----------------------------------------------|------------------------------------------------------|------------------------------------------------------------------------------------------------------------------------------------------------------------|--------------------------------------------------------------------------------------|--------------------------------------------------|
| Rowland (Public Health England) <sup>296</sup>  | 2020-06-03 to 2020-06-30 | Greater London   London                                  | Sublocal         | High                 | 327         | 0-39 (n=142); 40-49 (n=149); 60+ (n=36)                                                          | 77.7       | Non-probability | Health care workers and caregivers            | 47.1%                                                | Abbott   Abbott Architect nucleocapsid IgG assay   IgG                                                                                                     | 0.4%, 1.0% (FINDDx / MUHC independent evaluation)                                    | 52.2% (46.1-57.4%)                               |
| Graham (Imperial College London) <sup>297</sup> | 2020-06-01 to 2020-06-30 | Greater London   London                                  | Sublocal         | High                 | 241         | NR                                                                                               | NR         | Non-probability | Assisted living and long-term care facilities | 71.8% (66.0-77.0%)                                   | Abbott   Abbott Architect nucleocapsid IgG assay   IgG                                                                                                     | 0.4%, 1.0% (FINDDx / MUHC independent evaluation)                                    | -                                                |
| Davis (King's College London) <sup>298</sup>    | 2020-06-01 to 2020-06-30 | England   London                                         | Sublocal         | High                 | 1882        | Median 37 (NR)                                                                                   | 71.1       | Non-probability | Multiple populations                          | 7.0%                                                 | Sure Screen Diagnostics   SureScreen Diagnostics Rapid COVID-19 IgG/IgM Immunoassay Test Cassette   IgG, IgM                                               | 94.0%, 96.3% (Author-reported independent evaluation)                                | 3.6% (2.1-5.2%)                                  |
| Gulraj (Gibraltar Government) <sup>300</sup>    | 2020-06-03 to 2020-06-17 | Gibraltar                                                | Regional         | Unclear              | 1247        | NR                                                                                               | NR         | Non-probability | Health care workers and caregivers            | 1.4%                                                 | NR   NR   IgG                                                                                                                                              | No data                                                                              | -                                                |
| Lumley (University of Oxford) <sup>301</sup>    | 2020-04-14 to 2020-06-15 | Oxford                                                   | Local            | Moderate             | 1000        | Median 32 (IQR 28-35)                                                                            | 100.0      | Non-probability | Pregnant or parturient women                  | 5.3% (4.0-6.9%)                                      | University of Oxford   IgG ELISA   IgG                                                                                                                     | 99.1%, 99.0% (Test developer / manufacturer evaluation)                              | 3.7% (0.4-6.2%)                                  |
| Jones (North Bristol NHS Trust) <sup>302</sup>  | 2020-01-15 to 2020-06-15 | England   North Somerset, Bristol, South Gloucestershire | Sublocal         | High                 | 6858        | <=20years (n=114); 21-30 (n=1757); 31-40 (n=1624); 41-50 (n=1536); 51-60 (n=1408); 61-70 (n=402) | 77.8       | Non-probability | Health care workers and caregivers            | 9.3%                                                 | Abbott laboratories; RocheDiagnostics   Abbott SARS-CoV-2 IgG chemiluminescent microparticle assay; RocheTMElectrochemiluminescence immunoassay   IgG, IgM | 97.8%, 97.8% (Used Bastos SR/MA data; no sens, spec, or author adjustment available) | 7.4% (6.5-8.3%)                                  |



| Article Author (Study Organization)                                         | Sampling Dates (YMD)     | Location              | Geographic Scope | Overall Risk of Bias | Sample Size | Age                         | Female (%) | Sampling method | Sample frame                       | Uncorrected Seroprevalence (95% Confidence Interval) | Test Manufacturers   Names   Isotypes                                                                                                                                        | Test Sens, Spec (Source)                                                             | Corrected Seroprevalence (95% Credible Interval) |
|-----------------------------------------------------------------------------|--------------------------|-----------------------|------------------|----------------------|-------------|-----------------------------|------------|-----------------|------------------------------------|------------------------------------------------------|------------------------------------------------------------------------------------------------------------------------------------------------------------------------------|--------------------------------------------------------------------------------------|--------------------------------------------------|
| Favara (Cambridge University Hospitals NHS Foundation Trust) <sup>303</sup> | 2020-06-15 to 2020-06-15 | East of England       | Regional         | High                 | 434         | Median 41 (Range 19-66)     | 82.0       | Non-probability | Health care workers and caregivers | 18.4%                                                | Cambridge University Hospitals   Luminex   IgG                                                                                                                               | 84.0%, 100.0% (Test developer / manufacturer evaluation)                             | 21.6% (15.1-28.4%)                               |
| Pallett (Chelsea and Westminster Hospital NHS Trust) <sup>304</sup>         | 2020-04-08 to 2020-06-12 | England   London      | Local            | High                 | 504         | Mean 42.4 (Range 20.3-72.1) | 59.1       | Non-probability | Health care workers and caregivers | 10.6% (7.6-13.6%)                                    | CTK Biotech; Zhuhai Encode Medical Engineering   Onsite CTK Biotech COVID-19 split IgG/IgM Rapid Test, Encode SARS-CoV-2 split IgM/IgG One Step Rapid Test Device   IgG, IgM | 66.0%, 96.6% (Used Bastos SR/MA data; no sens, spec, or author adjustment available) | 11.5% (7.4-16.2%)                                |
| Baxendale (Royal Papworth Hospital NHS Trust) <sup>305</sup>                | 2020-04-20 to 2020-06-10 | England   Cambridge   | Sublocal         | High                 | 500         | Median 42 (IQR 33-51)       | 61.6       | Non-probability | Health care workers and caregivers | 14.0%                                                | Addenbrookes Hospital NHS Trust   Luminex based multiplexed particle flow cytometry assay   IgG                                                                              | 97.0%, 100.0% (Author-reported independent evaluation)                               | 14.2% (10.6-17.7%)                               |
| Razvi (Gateshead Health NHS Foundation Trust) <sup>307</sup>                | 2020-05-28 to 2020-06-08 | England   Gateshead   | Sublocal         | High                 | 2521        | Mean 42.5 (SD 12.6)         | 91.9       | Non-probability | Health care workers and caregivers | 19.4%                                                | Roche   Elecsys Anti-SARS-CoV-2 kit   IgG, IgM                                                                                                                               | 0.8%, 1.0% (FINDDx / MUHC independent evaluation)                                    | -                                                |
| Favara (The Queen Elizabeth Hospital) <sup>308</sup>                        | 2020-06-01 to 2020-06-07 | England   King's Lynn | Sublocal         | High                 | 70          | NR                          | NR         | Non-probability | Health care workers and caregivers | 21.4%                                                | Unclear   Luminex SARS-CoV-2 IgG multiplex particle-based flow cytometry assay   IgG                                                                                         | No data                                                                              | -                                                |
| Bampoe (University College London) <sup>309</sup>                           | 2020-05-11 to 2020-06-05 | England   London      | Sublocal         | High                 | 200         | Mean 37 (IQR 30-37)         | 83.5       | Non-probability | Health care workers and caregivers | 14.5% (9.9-20.1%)                                    | Abbott   Abbott Architect SARS-CoV-2 IgG assay   IgG                                                                                                                         | 0.4%, 1.0% (FINDDx / MUHC independent evaluation)                                    | -                                                |

| Article Author (Study Organization)                                           | Sampling Dates (YMD)     | Location                                          | Geographic Scope | Overall Risk of Bias | Sample Size | Age                                                                                                 | Female (%) | Sampling method | Sample frame                                   | Uncorrected Seroprevalence (95% Confidence Interval) | Test Manufacturers   Names   Isotypes                                                          | Test Sens, Spec (Source)                                        | Corrected Seroprevalence (95% Credible Interval) |
|-------------------------------------------------------------------------------|--------------------------|---------------------------------------------------|------------------|----------------------|-------------|-----------------------------------------------------------------------------------------------------|------------|-----------------|------------------------------------------------|------------------------------------------------------|------------------------------------------------------------------------------------------------|-----------------------------------------------------------------|--------------------------------------------------|
| Grant (Whittington Health NHS Trust) <sup>310</sup>                           | 2020-05-15 to 2020-06-05 | England   London                                  | Sublocal         | High                 | 2004        | Mean 40.21 (Range 18-73)                                                                            | NR         | Non-probability | Health care workers and caregivers             | 31.6%                                                | Roche Diagnostics   Elecsys Anti-SARS-CoV2 Immunoassay   IgG, IgM                              | 0.8%, 1.0% (FINDDx / MUHC independent evaluation)               | -                                                |
| McCafferty (Barts Health NHS Trust) <sup>311</sup>                            | 2020-05-01 to 2020-06-04 | London                                            | Sublocal         | High                 | 1253        | NR                                                                                                  | NR         | Non-probability | Patients seeking care for non-COVID-19 reasons | 18.0%                                                | Roche   Elecsys Anti-SARS-CoV-2 test   IgG, IgM                                                | 0.8%, 1.0% (FINDDx / MUHC independent evaluation)               | -                                                |
| Ladhani (Immunisation and Countermeasures Division) <sup>314</sup>            | 2020-05-01 to 2020-05-31 | Belfast, London, Glasgow, Manchester, Cardiff     | National         | High                 | 44          | Median 6.3 (seronegative); 9.1 (seropositive) (IQR 3.3-8.6 (seronegative); 5.9-11.6 (seropositive)) | 54.5       | Non-probability | Contacts of COVID patients                     | 36.2% (9.0-63.4%)                                    | Abbott Commerce   Abbott SARS-CoV-2 IgG   IgG                                                  | 0.4%, 1.0% (FINDDx / MUHC independent evaluation)               | -                                                |
| Khalil (St George's University of London) <sup>315</sup>                      | 2020-05-15 to 2020-05-28 | England   London                                  | Sublocal         | High                 | 190         | NR                                                                                                  | NR         | Non-probability | Health care workers and caregivers             | 22.0%                                                | Abbott   Abbott Architect SARS-CoV-2 IgG assay   IgG                                           | 0.4%, 1.0% (FINDDx / MUHC independent evaluation)               | -                                                |
| Poulikakos (Salford Royal NHS Foundation Trust) <sup>318</sup>                | 2020-05-04 to 2020-05-06 | England                                           | Sublocal         | High                 | 281         | NR                                                                                                  | 73.0       | Non-probability | Health care workers and caregivers             | 6.0%                                                 | Snibe Diagnostic   MAGLUMI 2019-nCoV IgG (CLIA)   IgG                                          | 0.7%, 1.0% (FINDDx / MUHC independent evaluation)               | -                                                |
| Shields (University Hospitals Birmingham NHS Foundation Trust) <sup>321</sup> | 2020-04-24 to 2020-04-25 | England   Birmingham                              | Sublocal         | High                 | 516         | Median 42 (IQR 30-51)                                                                               | 75.2       | Non-probability | Health care workers and caregivers             | 24.4%                                                | University of Birmingham Clinical Immunology Service   ELISA developed inhouse   IgG, IgA, IgM | 100.0%, 97.8% (Test developer / manufacturer evaluation)        | 22.5% (18.6-26.7%)                               |
| Sikora (Rutherford Health) <sup>322</sup>                                     | 2020-04-14 to 2020-04-24 | England   Bedlington, Liverpool, Newport, Reading | Local            | High                 | 161         | Mean 43 (NR)                                                                                        | 50.3       | Non-probability | Health care workers and caregivers             | 1.2%                                                 | Sugentech   Sugentech SGTi-flex COVID-19 IgM/IgG   IgG                                         | 66.0%, 96.6% (Used Bastos SR/MA data; no sens, spec, or author) | 0.8% (0.0-3.2%)                                  |

| Article Author (Study Organization)                                       | Sampling Dates (YMD)     | Location                 | Geographic Scope | Overall Risk of Bias | Sample Size | Age                                                                         | Female (%) | Sampling method | Sample frame                                   | Uncorrected Seroprevalence (95% Confidence Interval) | Test Manufacturers   Names   Isotypes                                                                         | Test Sens, Spec (Source)                                                             | Corrected Seroprevalence (95% Credible Interval) |
|---------------------------------------------------------------------------|--------------------------|--------------------------|------------------|----------------------|-------------|-----------------------------------------------------------------------------|------------|-----------------|------------------------------------------------|------------------------------------------------------|---------------------------------------------------------------------------------------------------------------|--------------------------------------------------------------------------------------|--------------------------------------------------|
|                                                                           |                          |                          |                  |                      |             |                                                                             |            |                 |                                                |                                                      |                                                                                                               | adjustment available)                                                                |                                                  |
| Ladhani (Public Health England) <sup>323</sup>                            | 2020-04-10 to 2020-04-13 | England   London         | Local            | High                 | 394         | 19-39 (n=66); 40-59 (n=113); 60-79 (n=71); 80+ (n=144)                      | 75.9       | Non-probability | Assisted living and long-term care facilities  | 77.9% (73.6-81.7%)                                   | In House: PHE England   SARS-CoV-2 infected virus lysate assay   NR                                           | 75.6%, 97.6% (Used Bastos SR/MA data; no sens, spec, or author adjustment available) | 98.4% (94.6-100.0%)                              |
| Houlihan (University College London Hospitals) <sup>324</sup>             | 2020-03-26 to 2020-04-08 | England   London         | Sublocal         | High                 | 181         | Median 34 (IQR 29-44)                                                       | 67.4       | Non-probability | Health care workers and caregivers             | 45.3%                                                | in-house flow cytometry and ELISA assays developed as part of the Crick-COVID-Consortium   NR   IgG, IgA, IgM | No data                                                                              | -                                                |
| <b>United States of America</b>                                           |                          |                          |                  |                      |             |                                                                             |            |                 |                                                |                                                      |                                                                                                               |                                                                                      |                                                  |
| Godbout (Virginia Commonwealth University) <sup>330</sup>                 | 2020-07-27 to 2020-10-02 | Virginia   Richmond      | Sublocal         | High                 | 1962        | Mean 37 (Range 19-75)                                                       | 77.3       | Non-probability | Health care workers and caregivers             | 1.4%                                                 | Abbott Laboratories   Abbott Architect SARS-CoV-2 IgG antibody immunoassay   IgG                              | 0.4%, 1.0% (FINDDx / MUHC independent evaluation)                                    | -                                                |
| Jimenez-Kurlander (Memorial Sloan Kettering Cancer Center) <sup>333</sup> | 2020-05-05 to 2020-09-10 | New York   New York City | Sublocal         | High                 | 257         | Median 6.9 (Range 1-18.6)                                                   | 65.0       | Non-probability | Patients seeking care for non-COVID-19 reasons | 7.8%                                                 | Abbott   Abbott architect   IgG                                                                               | 0.4%, 1.0% (FINDDx / MUHC independent evaluation)                                    | -                                                |
| Halbrook (University of California Los Angeles) <sup>335</sup>            | 2020-05-19 to 2020-08-31 | California               | Local            | Moderate             | 679         | 20-29 (n = 53) 30-39 (n = 237) 40-49 (n = 182) 50-59 (n = 182) 60+ (n = 15) | 6.0        | Non-probability | Essential non-healthcare workers               | 8.1%                                                 | NR   NR   IgG                                                                                                 | 75.6%, 97.6% (Used Bastos SR/MA data; no sens, spec, or author adjustment available) | 7.5% (4.8-10.9%)                                 |
| Halbrook (University of California Los Angeles) <sup>335</sup>            | 2020-04-08 to 2020-08-31 | California               | Local            | Moderate             | 1108        | 20-29 (n = 172) 30-39 (n = 418) 40-                                         | 64.1       | Non-probability | Health care workers and caregivers             | 3.9%                                                 | NR   NR   IgG                                                                                                 | 75.6%, 97.6% (Used Bastos SR/MA data;                                                | 2.0% (0.2-3.7%)                                  |

| Article Author (Study Organization)                                 | Sampling Dates (YMD)     | Location                 | Geographic Scope | Overall Risk of Bias | Sample Size | Age                                             | Female (%) | Sampling method | Sample frame                                   | Uncorrected Seroprevalence (95% Confidence Interval) | Test Manufacturers   Names   Isotypes                                                                                  | Test Sens, Spec (Source)                                                             | Corrected Seroprevalence (95% Credible Interval) |
|---------------------------------------------------------------------|--------------------------|--------------------------|------------------|----------------------|-------------|-------------------------------------------------|------------|-----------------|------------------------------------------------|------------------------------------------------------|------------------------------------------------------------------------------------------------------------------------|--------------------------------------------------------------------------------------|--------------------------------------------------|
| California Los Angeles) <sup>335</sup>                              |                          |                          |                  |                      |             | 49 (n = 235)<br>50-59 (n = 148)<br>60+ (n = 55) |            |                 |                                                |                                                      |                                                                                                                        | no sens, spec, or author adjustment available)                                       |                                                  |
| Brant-Zawadzki (Hoag Memorial Hospital Presbyterian) <sup>337</sup> | 2020-07-15 to 2020-08-15 | California               | Local            | High                 | 92          | Mean 42.05 (SD 8.27)                            | 13.0       | Non-probability | Essential non-healthcare workers               | 4.3% (1.2-10.8%)                                     | Ortho Diagnostics   Ortho Clinical Diagnostics VITROS Anti-SARS-CoV-2 IgG assay   IgG                                  | 93.6%, 100.0% (Used author-adjusted estimate)                                        | 4.3% (1.5-10.0%)                                 |
| Brant-Zawadzki (Hoag Memorial Hospital Presbyterian) <sup>337</sup> | 2020-07-15 to 2020-08-15 | California               | Local            | High                 | 2754        | Mean 43.06 (SD 12.05)                           | 72.1       | Non-probability | Health care workers and caregivers             | 2.8% (2.2-3.4%)                                      | Ortho Diagnostics   Ortho Clinical Diagnostics VITROS Anti-SARS-CoV-2 IgG assay   IgG                                  | 93.6%, 100.0% (Used author-adjusted estimate)                                        | 2.8% (2.2-3.4%)                                  |
| Sabourin (University of Colorado) <sup>338</sup>                    | 2020-07-15 to 2020-08-15 | Colorado                 | Local            | High                 | 264         | Median 38 (IQR 32-48)                           | 54.2       | Non-probability | Essential non-healthcare workers               | 4.0%                                                 | Exsera BioLabs   NR   IgG                                                                                              | 85.0%, 98.6% (Test developer / manufacturer evaluation)                              | 3.1% (0.4-6.1%)                                  |
| Coffman (University of Louisville) <sup>340</sup>                   | 2020-07-01 to 2020-07-31 | Kentucky   Louisville    | Local            | Unclear              | 1100        | NR                                              | NR         | Non-probability | Health care workers and caregivers             | 2.2%                                                 | NR   NR   NR                                                                                                           | No data                                                                              | -                                                |
| Azzi (Albert Einstein College of Medicine) <sup>343</sup>           | 2020-05-03 to 2020-07-29 | New York   New York City | Sublocal         | Moderate             | 912         | NR                                              | NR         | Non-probability | Patients seeking care for non-COVID-19 reasons | 16.7%                                                | Abbott   Abbott SARS-CoV-2 IgG antibody test   IgG                                                                     | 0.4%, 1.0% (FINDDx / MUHC independent evaluation)                                    | -                                                |
| Nicholson (Scripps Clinic) <sup>344</sup>                           | 2020-04-14 to 2020-07-28 | California   San Diego   | Local            | High                 | 11993       | NR                                              | NR         | Non-probability | Health care workers and caregivers             | 0.9%                                                 | Diazyme; Abbott Laboratories   Diazyme DZ-Lite 2019-nCoV IgG (CLIA) Assay, Abbott Architect SARS-CoV-2 IgG assay   IgG | 97.8%, 97.8% (Used Bastos SR/MA data; no sens, spec, or author adjustment available) | 0.0% (0.0-0.1%)                                  |

| Article Author (Study Organization)                                           | Sampling Dates (YMD)     | Location                    | Geographic Scope | Overall Risk of Bias | Sample Size | Age                                                     | Female (%) | Sampling method | Sample frame                                   | Uncorrected Seroprevalence (95% Confidence Interval) | Test Manufacturers   Names   Isotypes                                                                                                                                                  | Test Sens, Spec (Source)                                 | Corrected Seroprevalence (95% Credible Interval) |
|-------------------------------------------------------------------------------|--------------------------|-----------------------------|------------------|----------------------|-------------|---------------------------------------------------------|------------|-----------------|------------------------------------------------|------------------------------------------------------|----------------------------------------------------------------------------------------------------------------------------------------------------------------------------------------|----------------------------------------------------------|--------------------------------------------------|
| Haizler-Cohen (Donald and Barbara Zucker School of Medicine) <sup>347</sup>   | 2020-05-27 to 2020-07-24 | New York                    | Regional         | High                 | 1671        | NR                                                      | 100.0      | Non-probability | Pregnant or parturient women                   | 16.1%                                                | Roche   Roche Elecsys® Anti-SARS-CoV-2 RUO Assay   IgG                                                                                                                                 | No data                                                  | -                                                |
| Klawiter (Massachusetts General Hospital) <sup>348</sup>                      | 2020-05-29 to 2020-07-23 | Massachusetts   Boston      | Sublocal         | High                 | 143         | NR                                                      | NR         | Non-probability | Multiple populations                           | 6.3%                                                 | Massachusetts General Hospital   MGH SARS-CoV-2 IgG ELISA   IgG                                                                                                                        | 99.7%, 100.0% (Test developer / manufacturer evaluation) | 6.1% (1.0-10.9%)                                 |
| Klawiter (Massachusetts General Hospital) <sup>348</sup>                      | 2020-05-29 to 2020-07-23 | Massachusetts   Boston      | Local            | High                 | 227         | NR                                                      | NR         | Non-probability | Patients seeking care for non-COVID-19 reasons | 3.5%                                                 | Massachusetts General Hospital   MGH SARS-CoV-2 IgG ELISA   IgG                                                                                                                        | 99.7%, 100.0% (Test developer / manufacturer evaluation) | 2.7% (0.0-5.3%)                                  |
| Lopez (Harvard Medical School) <sup>351</sup>                                 | 2020-07-15 to 2020-07-20 | Indiana   St. John Township | Sublocal         | Moderate             | 753         | 18-35 (n=153); 36-50 (n=287); 51-65 (n=282); 66+ (n=30) | 84.3       | Non-probability | Essential non-healthcare workers               | 1.7% (0.3-3.3%)                                      | Abbott Alinity   Abbott Alinity SARS-CoV-2 IgG antibody test   IgG                                                                                                                     | 100.0%, 99.0% (Used author-adjusted estimate)            | 1.7% (0.9-2.7%)                                  |
| Reuben (District of Columbia Department of Health (DC Health)) <sup>354</sup> | 2020-05-28 to 2020-07-15 | Washington D.C   Washington | Regional         | High                 | 310         | Mean 42.55 (SD 9.07)                                    | 23.5       | Non-probability | Essential non-healthcare workers               | 3.5%                                                 | DiaSorin Inc.   DiaSorin LIAISON® XL assay   IgG                                                                                                                                       | 0.8%, 1.0% (FINDDx / MUHC independent evaluation)        | -                                                |
| Shah (Mayo Clinic) <sup>356</sup>                                             | 2020-05-25 to 2020-07-09 | Minnesota   Rochester       | Sublocal         | High                 | 320         | Mean 36.3 (SD 10.8)                                     | 78.1       | Non-probability | Health care workers and caregivers             | 0.6%                                                 | Ortho-Clinical Diagnostics; EUROIMMUN; Roche Diagnostics   Euroimmun anti-SARS-CoV-2 IgG ELISA, Ortho-Clinical Diagnostics anti-SARS-CoV-2 IgG Antibody Immunoassay, Roche Diagnostics | No data                                                  | -                                                |

| Article Author (Study Organization)                                    | Sampling Dates (YMD)     | Location              | Geographic Scope | Overall Risk of Bias | Sample Size | Age                                                                                                                                  | Female (%) | Sampling method | Sample frame                       | Uncorrected Seroprevalence (95% Confidence Interval) | Test Manufacturers   Names   Isotypes                                                                                                                                                                                                    | Test Sens, Spec (Source)                          | Corrected Seroprevalence (95% Credible Interval) |
|------------------------------------------------------------------------|--------------------------|-----------------------|------------------|----------------------|-------------|--------------------------------------------------------------------------------------------------------------------------------------|------------|-----------------|------------------------------------|------------------------------------------------------|------------------------------------------------------------------------------------------------------------------------------------------------------------------------------------------------------------------------------------------|---------------------------------------------------|--------------------------------------------------|
|                                                                        |                          |                       |                  |                      |             |                                                                                                                                      |            |                 |                                    |                                                      | anti-SARS-CoV-2 Total Antibody Immunoassay   IgG                                                                                                                                                                                         |                                                   |                                                  |
| Shah (Mayo Clinic) <sup>356</sup>                                      | 2020-05-25 to 2020-07-09 | Minnesota   Rochester | Sublocal         | High                 | 248         | Mean 47.1 (SD 11.7)                                                                                                                  | 87.5       | Non-probability | Health care workers and caregivers | 0.0%                                                 | Ortho-Clinical Diagnostics; EUROIMMUN ; Roche Diagnostics   Euroimmun anti-SARS-CoV-2 IgG ELISA, Ortho-Clinical Diagnostics anti-SARS-CoV-2 IgG Antibody Immunoassay, Roche Diagnostics anti-SARS-CoV-2 Total Antibody Immunoassay   IgG | No data                                           | -                                                |
| Mohr (University of Iowa) <sup>357</sup>                               | 2020-05-13 to 2020-07-08 |                       | National         | Moderate             | 1606        | <30 (n = 376); 31-40 (n = 622); 41-50 (n = 319); 51-60 (n = 222); >61 (n = 67)                                                       | 63.4       | Non-probability | Health care workers and caregivers | 1.7%                                                 | IL EUROIMMUN ; Abbott Laboratories; Chicago   Architect i2000 ELISA EUROIMMUN   IgG                                                                                                                                                      | No data                                           | -                                                |
| Dimcheff (Veterans Affairs Ann Arbor Healthcare System) <sup>358</sup> | 2020-06-08 to 2020-07-08 | Michigan              | Local            | Moderate             | 1476        | 18-30 (n=111, 7.5%); 31-40 (n=372, 25.2%); 41-50 (n=392, 26.6%); 51-60 (n=406, 27.5%); >60 (n=149, 10.1%); No response (n=46, 3.1%)/ | 64.0       | Non-probability | Health care workers and caregivers | 4.9% (3.8-6.1%)                                      | Abbott   ARCHITECT i2000SR analyzer   IgG                                                                                                                                                                                                | 0.4%, 1.0% (FINDDx / MUHC independent evaluation) | -                                                |

| Article Author (Study Organization)                                  | Sampling Dates (YMD)     | Location                               | Geographic Scope | Overall Risk of Bias | Sample Size | Age                                         | Female (%) | Sampling method | Sample frame                                   | Uncorrected Seroprevalence (95% Confidence Interval) | Test Manufacturers   Names   Isotypes                                                                                                                                                                                                              | Test Sens, Spec (Source)                                                             | Corrected Seroprevalence (95% Credible Interval) |
|----------------------------------------------------------------------|--------------------------|----------------------------------------|------------------|----------------------|-------------|---------------------------------------------|------------|-----------------|------------------------------------------------|------------------------------------------------------|----------------------------------------------------------------------------------------------------------------------------------------------------------------------------------------------------------------------------------------------------|--------------------------------------------------------------------------------------|--------------------------------------------------|
| Freeman (University of Pittsburgh School of Medicine) <sup>362</sup> | 2020-03-15 to 2020-07-04 | Pennsylvania   Pittsburgh              | Sublocal         | High                 | 485         | Mean 10.96 (Range 0.79-18.96)               | 46.6       | Non-probability | Patients seeking care for non-COVID-19 reasons | 1.0% (0.3-2.4%)                                      | Euroimmun; Siemens; Beckman Coulter   Euroimmun Assay, Beckman Coulter SARS-CoV-2 IgG automated Emergency Use Authorization (EUA) assay, Siemens Centaur SARS-CoV-2 Total automated EUA assay   IgG                                                | 75.6%, 97.6% (Used Bastos SR/MA data; no sens, spec, or author adjustment available) | 0.3% (0.0-1.2%)                                  |
| Barrett (Rutgers Robert Wood Johnson Medical School) <sup>364</sup>  | 2020-04-28 to 2020-06-30 | New Jersey   New Brunswick, Somerville | Sublocal         | Moderate             | 3907        | 20-39 (N=1703); 40-59 (n=1690); 60+ (n=472) | 73.6       | Non-probability | Health care workers and caregivers             | 9.6%                                                 | Abbott Laboratories   Abbott Architect SARS-CoV-2 assay   IgG                                                                                                                                                                                      | 0.4%, 1.0% (FINDDx / MUHC independent evaluation)                                    | -                                                |
| Wilkins (Northwestern University) <sup>365</sup>                     | 2020-05-28 to 2020-06-30 | Illinois   Chicago                     | Local            | Moderate             | 6510        | Mean 40.6 (SD 12)                           | 79.6       | Non-probability | Health care workers and caregivers             | 5.3% (4.8-5.9%)                                      | Abbott   Abbott Architect SARS-CoV-2 IgG assay   IgG                                                                                                                                                                                               | 0.4%, 1.0% (FINDDx / MUHC independent evaluation)                                    | -                                                |
| Nailescu (Indiana University) <sup>366</sup>                         | 2020-05-01 to 2020-06-30 | Indiana   Indianapolis                 | Local            | High                 | 31          | Median 12 (Range 2-21)                      | 32.3       | Non-probability | Patients seeking care for non-COVID-19 reasons | 3.2%                                                 | Mount Sinai medical center; Abnova; Eli Lilly and Co & IUSM   (1) Abnova (#KA5826) (2) Indiana University School of Medicine (IUSM) in collaboration with Eli Lilly and Co., Indianapolis, IN, (LSN3832334); (3) Mount Sinai Medical Center's (MSM | 94.4%, 98.5% (Test developer / manufacturer evaluation)                              | 2.4% (0.0-10.2%)                                 |

| Article Author (Study Organization)                                    | Sampling Dates (YMD)     | Location                 | Geographic Scope | Overall Risk of Bias | Sample Size | Age                                                                         | Female (%) | Sampling method | Sample frame                                   | Uncorrected Seroprevalence (95% Confidence Interval) | Test Manufacturers   Names   Isotypes                                                                                                                     | Test Sens, Spec (Source)                                | Corrected Seroprevalence (95% Credible Interval) |
|------------------------------------------------------------------------|--------------------------|--------------------------|------------------|----------------------|-------------|-----------------------------------------------------------------------------|------------|-----------------|------------------------------------------------|------------------------------------------------------|-----------------------------------------------------------------------------------------------------------------------------------------------------------|---------------------------------------------------------|--------------------------------------------------|
|                                                                        |                          |                          |                  |                      |             |                                                                             |            |                 |                                                |                                                      | C) 2-Step ELISA   IgG, IgM                                                                                                                                |                                                         |                                                  |
| Rivas (Cedars-Sinai Medical Center) <sup>369</sup>                     | 2020-05-11 to 2020-06-28 | California   Los Angeles | Local            | Moderate             | 6201        | Mean 41.46 (SD 12.01)                                                       | 67.9       | Non-probability | Health care workers and caregivers             | 3.5%                                                 | Abbott   Architect SARS-CoV-2 IgG chemiluminescent microparticle immunoassay   IgG                                                                        | 0.4%, 1.0% (FINDDx / MUHC independent evaluation)       | -                                                |
| Patel (Vanderbilt University Medical Center) <sup>370</sup>            | 2020-06-02 to 2020-06-27 | Tennessee   Nashville    | Sublocal         | High                 | 230         | NR                                                                          | NR         | Non-probability | Health care workers and caregivers             | 3.5%                                                 | CDC   NR   NR                                                                                                                                             | 96.0%, 99.0% (Test developer / manufacturer evaluation) | 2.4% (0.0-5.5%)                                  |
| Baker (Emory University Hospital) <sup>371</sup>                       | 2020-04-19 to 2020-06-26 | Atlanta                  | Local            | Moderate             | 10275       | <30 (n=1581); 30-39 (n=2953); 40-49 (n=2118); 50-59 (n=1805); >=60 (n=1153) | 72.6       | Non-probability | Health care workers and caregivers             | 5.7% (5.2-6.1%)                                      | Emory University   In house ELISA   IgG                                                                                                                   | 97.5%, 98.0% (Test developer / manufacturer evaluation) | 3.0% (0.0-5.3%)                                  |
| McBride (Memorial Sloan Kettering Cancer Center) <sup>372</sup>        | 2020-05-07 to 2020-06-25 | New York   New York City | Sublocal         | High                 | 952         | NR                                                                          | NR         | Non-probability | Patients seeking care for non-COVID-19 reasons | 5.5%                                                 | Abbott   Abbott Architect SARS-CoV-2 IgG assay   IgG                                                                                                      | 0.4%, 1.0% (FINDDx / MUHC independent evaluation)       | -                                                |
| Moscola (Northwell Health COVID-19 Research Consortium) <sup>373</sup> | 2020-04-20 to 2020-06-23 | New York   New York City | Local            | High                 | 40329       | Median 42 (IQR 31.5-54.5)                                                   | 73.7       | Non-probability | Health care workers and caregivers             | 13.7%                                                | AnshLabs; Roche; DiaSorin; Abbott Laboratories; Ortho Clinical Diagnostics; Euroimmun   Euroimmun SARS-CoV-2 ELISA, AnshLabs SARS-CoV-2 IgG ELISA, Abbott | No data                                                 | -                                                |



| Article Author (Study Organization)              | Sampling Dates (YMD)     | Location                                                                                                                                                                                                                                                               | Geographic Scope | Overall Risk of Bias | Sample Size | Age            | Female (%) | Sampling method | Sample frame                       | Uncorrected Seroprevalence (95% Confidence Interval) | Test Manufacturers   Names   Isotypes                                                                                                                                                                                                                                     | Test Sens, Spec (Source)                                | Corrected Seroprevalence (95% Credible Interval) |
|--------------------------------------------------|--------------------------|------------------------------------------------------------------------------------------------------------------------------------------------------------------------------------------------------------------------------------------------------------------------|------------------|----------------------|-------------|----------------|------------|-----------------|------------------------------------|------------------------------------------------------|---------------------------------------------------------------------------------------------------------------------------------------------------------------------------------------------------------------------------------------------------------------------------|---------------------------------------------------------|--------------------------------------------------|
|                                                  |                          |                                                                                                                                                                                                                                                                        |                  |                      |             |                |            |                 |                                    |                                                      | Architect SARS-CoV-2 IgG, Ortho Clinical Diagnostics VITROS Anti-SARSCoV-2 IgG, Ortho Clinical Diagnostics VITROS Immunodiagnostic Products Anti-SARS-CoV-2 Total Reagent Pack and Calibrator, DiaSorin LIAISON SARS-CoV-2 S1/S2 IgG, Roche Elecsys Anti-SARS-CoV-2   IgG |                                                         |                                                  |
| Self (CDC COVID-19 Response Team) <sup>376</sup> | 2020-04-03 to 2020-06-19 | Colorado, Minnesota, Oregon, Utah, Washington, Tennessee, New York, California, North Carolina, Massachusetts, Ohio, Maryland   Winston-Salem, Murray, Portland, Baltimore, Bronx, Springfield, Los Angeles, Aurora, Nashville, Seattle, Columbus, Boston, Minneapolis | National         | Moderate             | 3248        | Median 36 (NR) | 65.5       | Non-probability | Health care workers and caregivers | 6.0%                                                 | CDC   NR   NR                                                                                                                                                                                                                                                             | 96.0%, 99.0% (Test developer / manufacturer evaluation) | 4.5% (0.5-6.9%)                                  |

| Article Author (Study Organization)                           | Sampling Dates (YMD)     | Location                    | Geographic Scope | Overall Risk of Bias | Sample Size | Age                                                                                                      | Female (%) | Sampling method | Sample frame                                  | Uncorrected Seroprevalence (95% Confidence Interval) | Test Manufacturers   Names   Isotypes                                                         | Test Sens, Spec (Source)                                                             | Corrected Seroprevalence (95% Credible Interval) |
|---------------------------------------------------------------|--------------------------|-----------------------------|------------------|----------------------|-------------|----------------------------------------------------------------------------------------------------------|------------|-----------------|-----------------------------------------------|------------------------------------------------------|-----------------------------------------------------------------------------------------------|--------------------------------------------------------------------------------------|--------------------------------------------------|
| Rebeiro (Vanderbilt University) <sup>380</sup>                | 2020-05-15 to 2020-06-15 | Tennessee                   | Regional         | High                 | 11787       | Median 40.3 (IgG Negative); 32.4 (IgG Positive) (IQR 30.9-52.4 (IgG Negative); 26.5-43.4 (IgG Positive)) | NR         | Non-probability | Health care workers and caregivers            | 1.0%                                                 | Abbott   Abbott ARCHITECT SARS-CoV-2 IgG Assay   IgG                                          | 0.4%, 1.0% (FINDDx / MUHC independent evaluation)                                    | -                                                |
| Akinbami (Region 2 South Healthcare Coalition) <sup>382</sup> | 2020-05-18 to 2020-06-13 | Michigan   Detroit          | Local            | Moderate             | 16397       | Mean 42.1 (SD 12.2)                                                                                      | 68.6       | Non-probability | Health care workers and caregivers            | 6.9% (6.5-7.3%)                                      | Ortho Clinical Diagnostics   VITROS Immunodiagnostic Products Anti- SARS-CoV-2 IgG Test   IgG | 0.8%, 1.0% (FINDDx / MUHC independent evaluation)                                    | -                                                |
| Dora (Veterans Affairs Healthcare System) <sup>383</sup>      | 2020-06-05 to 2020-06-12 | California   Los Angeles    | Sublocal         | High                 | 150         | Median 75 (PCR positive); 74 (PCR negative) (NR)                                                         | NR         | Non-probability | Assisted living and long-term care facilities | 17.3%                                                | DiaSorin   DiaSorin Liaison   IgG                                                             | 0.8%, 1.0% (FINDDx / MUHC independent evaluation)                                    | -                                                |
| Yogo (Sharp Healthcare) <sup>386</sup>                        | 2020-05-20 to 2020-06-08 | California   San Diego      | Local            | High                 | 1770        | 18-35 (n=802); 36-45 (n=460); 45-55 (n=323); 56-65 (n=146); >65 (n=39)                                   | 75.5       | Non-probability | Health care workers and caregivers            | 2.2%                                                 | Roche Diagnostics   Elecsys Anti-SARS-CoV-2   NR                                              | 0.9%, 1.0% (FINDDx / MUHC independent evaluation)                                    | -                                                |
| Hogan (Stanford University) <sup>387</sup>                    | 2020-04-20 to 2020-06-08 | California   San Francisco  | Local            | High                 | 12418       | Median 39.5 (IQR 32.4-50.3)                                                                              | 70.7       | Non-probability | Health care workers and caregivers            | 0.9% (0.7-1.1%)                                      | Stanford Health Care   SHC Laboratory - Developed ELISA   IgG                                 | 75.6%, 97.6% (Used Bastos SR/MA data; no sens, spec, or author adjustment available) | 0.1% (0.0-0.2%)                                  |
| Flannery (University of Pennsylvania) <sup>389</sup>          | 2020-04-04 to 2020-06-03 | Pennsylvania   Philadelphia | Local            | Moderate             | 1293        | Median 31 (IQR 27-35)                                                                                    | 100.0      | Non-probability | Pregnant or parturient women                  | 6.2% (4.9-8.0%)                                      | Author-designed   N/A - Author-designed   IgG, IgM                                            | 100.0%, 98.9% (Author-reported independent evaluation)                               | 5.3% (3.6-7.2%)                                  |

| Article Author (Study Organization)                            | Sampling Dates (YMD)     | Location                                                                                              | Geographic Scope | Overall Risk of Bias | Sample Size | Age                                                                                         | Female (%) | Sampling method | Sample frame                                   | Uncorrected Seroprevalence (95% Confidence Interval) | Test Manufacturers   Names   Isotypes                                          | Test Sens, Spec (Source)                          | Corrected Seroprevalence (95% Credible Interval) |
|----------------------------------------------------------------|--------------------------|-------------------------------------------------------------------------------------------------------|------------------|----------------------|-------------|---------------------------------------------------------------------------------------------|------------|-----------------|------------------------------------------------|------------------------------------------------------|--------------------------------------------------------------------------------|---------------------------------------------------|--------------------------------------------------|
| Coffman (University of Louisville) <sup>340</sup>              | 2020-04-01 to 2020-05-31 | Kentucky   Louisville                                                                                 | Local            | Unclear              | 1372        | NR                                                                                          | NR         | Non-probability | Health care workers and caregivers             | 1.0%                                                 | NR   NR   NR                                                                   | No data                                           | -                                                |
| Addetia (University of Washington) <sup>390</sup>              | 2020-05-01 to 2020-05-31 | Washington   Seattle                                                                                  | Sublocal         | High                 | 120         | NR                                                                                          | 7.5        | Probability     | Essential non-healthcare workers               | 5.0%                                                 | Abbott   Abbott Architect SARS-CoV-2 IgG   IgG                                 | 0.4%, 1.0% (FINDDx / MUHC independent evaluation) | -                                                |
| Gray (Truckee Meadows Fire Protection District) <sup>391</sup> | 2020-05-01 to 2020-05-31 | Nevada                                                                                                | Sublocal         | High                 | 132         | NR                                                                                          | NR         | Non-probability | Essential non-healthcare workers               | 14.0%                                                | NR   NR   NR                                                                   | No data                                           | -                                                |
| Brunner (Bassett Medical Center) <sup>392</sup>                | 2020-05-04 to 2020-05-29 | New York   Upstate New York                                                                           | Local            | High                 | 764         | Mean 41.8 (seropositive); 43.7 (seronegative) (SD 16.0 (seropositive); 13.7 (seronegative)) | 56.9       | Non-probability | Health care workers and caregivers             | 2.0%                                                 | Abbott Laboratories   SARS-CoV-2 IgG Abbott Architect assay   IgG              | 0.4%, 1.0% (FINDDx / MUHC independent evaluation) | -                                                |
| Brunner (Bassett Medical Center) <sup>392</sup>                | 2020-05-04 to 2020-05-29 | New York   Upstate New York                                                                           | Local            | High                 | 762         | Mean 41.8 (igg+); 43.7 (igg-) (SD 16 (igg+); 13.7(igg-))                                    | NR         | Non-probability | Health care workers and caregivers             | 4.5%                                                 | Linden; Ortho-Clinical Diagnostics; NJ   VITROS Anti-SARS-CoV-2 IgG Test   IgG | 0.8%, 1.0% (FINDDx / MUHC independent evaluation) | -                                                |
| Sims (Oakland University) <sup>394</sup>                       | 2020-04-13 to 2020-05-28 | Michigan   Trenton, Wayne, Grosse Pointe, Farmington Hills, Dearborn, Taylor, Canton, Royal Oak, Troy | Sublocal         | Moderate             | 20614       | Mean 43.1 (SD 13)                                                                           | 76.3       | Non-probability | Health care workers and caregivers             | 8.1% (6.8-8.9%)                                      | EUROIMMUN Lübeck   EUROIMMUN SARS-CoV-2 IgG assay   IgG                        | 98.1%, 99.4% (Used author-adjusted estimate)      | 8.1% (7.7-8.5%)                                  |
| Stavert (Cambridge Health Alliance) <sup>399</sup>             | 2020-04-13 to 2020-05-24 | Massachusetts   Cambridge                                                                             | Sublocal         | High                 | 24          | 11-64                                                                                       | 45.8       | Non-probability | Patients seeking care for non-COVID-19 reasons | 0.0%                                                 | DiaSorin   DiaSorin Liaison   IgG                                              | 0.8%, 1.0% (FINDDx / MUHC independent evaluation) | -                                                |

| Article Author (Study Organization)                         | Sampling Dates (YMD)     | Location                                                                         | Geographic Scope | Overall Risk of Bias | Sample Size | Age                        | Female (%) | Sampling method | Sample frame                       | Uncorrected Seroprevalence (95% Confidence Interval) | Test Manufacturers   Names   Isotypes                                                            | Test Sens, Spec (Source)                                 | Corrected Seroprevalence (95% Credible Interval) |
|-------------------------------------------------------------|--------------------------|----------------------------------------------------------------------------------|------------------|----------------------|-------------|----------------------------|------------|-----------------|------------------------------------|------------------------------------------------------|--------------------------------------------------------------------------------------------------|----------------------------------------------------------|--------------------------------------------------|
| Ahmad (The Lundquist Institute) <sup>400</sup>              | 2020-04-21 to 2020-05-22 | California                                                                       | Local            | High                 | 244         | Mean 51.1 (NR)             | 50.0       | Non-probability | Multiple populations               | 20.9%                                                | Hangzhou Testsea Biotechnology Co.   One Step SARS-CoV2 (COVID-19) IgG/IgM Rapid Test   IgG, IgM | 0.8%, 0.9% (FINDDx / MUHC independent evaluation)        | -                                                |
| Jackson (Michigan Department of Corrections) <sup>401</sup> | 2020-05-14 to 2020-05-22 | Michigan                                                                         | Sublocal         | Unclear              | 1248        | NR                         | NR         | Non-probability | Persons who are incarcerated       | 92.0%                                                | NR   NR   NR                                                                                     | No data                                                  | -                                                |
| Jackson (Michigan Department of Corrections) <sup>401</sup> | 2020-05-14 to 2020-05-22 | Michigan   Lenox Township                                                        | Sublocal         | Unclear              | 1201        | NR                         | NR         | Non-probability | Persons who are incarcerated       | 65.6%                                                | NR   NR   NR                                                                                     | No data                                                  | -                                                |
| Jackson (Michigan Department of Corrections) <sup>401</sup> | 2020-05-14 to 2020-05-22 | Michigan   Detroit                                                               | Sublocal         | Unclear              | 57          | NR                         | NR         | Non-probability | Persons who are incarcerated       | 35.0%                                                | NR   NR   NR                                                                                     | No data                                                  | -                                                |
| Jackson (Michigan Department of Corrections) <sup>401</sup> | 2020-05-14 to 2020-05-22 | Michigan                                                                         | Sublocal         | Unclear              | 867         | NR                         | NR         | Non-probability | Persons who are incarcerated       | 12.2%                                                | NR   NR   NR                                                                                     | No data                                                  | -                                                |
| Staletovich (Coral Springs City Government) <sup>402</sup>  | 2020-05-17 to 2020-05-22 | Florida   Coral Springs                                                          | Local            | Unclear              | 700         | NR                         | NR         | Non-probability | Essential non-healthcare workers   | 0.0%                                                 | Cellex   NR   NR                                                                                 | No data                                                  | -                                                |
| Leidner (Chiles Research Institute) <sup>403</sup>          | 2020-04-08 to 2020-05-22 | Oregon   Seaside, Newberg, Portland, Oregon City, Hood River, Medford, Milwaukie | Regional         | High                 | 10019       | Median 42 (Range 18-82)    | 75.7       | Non-probability | Health care workers and caregivers | 2.5%                                                 | Author-designed   N/A - Author-designed   IgG                                                    | 80.0%, 100.0% (Test developer / manufacturer evaluation) | 3.2% (2.5-4.3%)                                  |
| Pritchett (University of Utah) <sup>404</sup>               | 2020-04-18 to 2020-05-21 | Utah                                                                             | Sublocal         | High                 | 39          | Median 45 (Range 23 to 76) | 89.7       | Non-probability | Patients seeking care for non-     | 2.6%                                                 | in house - ARUP   NR   IgG                                                                       | No data                                                  | -                                                |

| Article Author (Study Organization)                        | Sampling Dates (YMD)     | Location                                                       | Geographic Scope | Overall Risk of Bias | Sample Size | Age                     | Female (%) | Sampling method | Sample frame                       | Uncorrected Seroprevalence (95% Confidence Interval) | Test Manufacturers   Names   Isotypes                                                      | Test Sens, Spec (Source)                                | Corrected Seroprevalence (95% Credible Interval) |
|------------------------------------------------------------|--------------------------|----------------------------------------------------------------|------------------|----------------------|-------------|-------------------------|------------|-----------------|------------------------------------|------------------------------------------------------|--------------------------------------------------------------------------------------------|---------------------------------------------------------|--------------------------------------------------|
|                                                            |                          |                                                                |                  |                      |             |                         |            |                 | COVID-19 reasons                   |                                                      |                                                                                            |                                                         |                                                  |
| Shukla (Vincere Cancer Center) <sup>405</sup>              | 2020-04-24 to 2020-05-21 | Arizona   Tempe, Peoria, Phoenix, Glendale, Chandler, Surprise | Regional         | Moderate             | 3326        | Median 41.3 (IQR 9.6)   | 16.4       | Non-probability | Essential non-healthcare workers   | 1.5%                                                 | Ray Biotech   RayBiotech Coronavirus (COVID-19) IgG Rapid Test Kit   IgG                   | 0.1%, 0.8% (FINDDx / MUHC independent evaluation)       | -                                                |
| Rosser (Stanford Health Care) <sup>406</sup>               | 2020-04-20 to 2020-05-20 | California   San Francisco Bay Area                            | Local            | High                 | 10449       | Mean 40.9 (SD 11.6)     | 65.0       | Non-probability | Health care workers and caregivers | 1.3%                                                 | Stanford Clinical Laboratory   anti-SARS-CoV-2 RBD enzyme-linked immunosorbent assay   IgG | 87.0%, 99.8% (Test developer / manufacturer evaluation) | 0.6% (0.0-1.3%)                                  |
| Geraci (MUSC Health-Lancaster) <sup>409</sup>              | 2020-03-16 to 2020-05-20 | South Carolina   Lancaster                                     | Sublocal         | High                 | 230         | NR                      | NR         | Non-probability | Health care workers and caregivers | 2.2%                                                 | Abbott   NR   NR                                                                           | No data                                                 | -                                                |
| Tarabichi (Case Western Reserve University) <sup>410</sup> | 2020-04-20 to 2020-05-19 | Ohio   Cleveland                                               | Local            | High                 | 296         | Mean 44.1 (NR)          | 14.2       | Non-probability | Essential non-healthcare workers   | 5.4% (3.1-8.6%)                                      | Epitope Diagnostics; Inc   EDI™ Novel Coronavirus COVID-19 ELISA Kits   IgG, IgM           | 0.8%, 0.9% (FINDDx / MUHC independent evaluation)       | -                                                |
| Mughal (Monmouth Medical Centre) <sup>411</sup>            | 2020-05-14 to 2020-05-19 | New Jersey   Long Branch                                       | Sublocal         | High                 | 121         | Mean 39.2 (IQR 28-48.5) | 82.6       | Non-probability | Health care workers and caregivers | 0.8%                                                 | SD Biosensor   Standard Q COVID-19 IgM/IgG Duo rapid immunochromatography test kit   IgG   | 96.2%, 96.6% (Test developer / manufacturer evaluation) | 0.9% (0.0-3.3%)                                  |
| Morris (Emory University) <sup>413</sup>                   | 2020-04-16 to 2020-05-18 | Georgia   Atlanta                                              | Sublocal         | Unclear              | 300         | Mean 41-50 (NR)         | 83.0       | Non-probability | Health care workers and caregivers | 4.7%                                                 | NR   NR   IgG                                                                              | No data                                                 | -                                                |
| Parker-Magyar (Summit Medical Center) <sup>418</sup>       | 2020-05-01 to 2020-05-14 | New Jersey   Long Hill Township                                | Sublocal         | High                 | 70          | NR                      | NR         | Non-probability | Essential non-healthcare workers   | 4.3%                                                 | NR   NR   NR                                                                               | No data                                                 | -                                                |

| Article Author (Study Organization)                       | Sampling Dates (YMD)     | Location                    | Geographic Scope | Overall Risk of Bias | Sample Size | Age                   | Female (%) | Sampling method | Sample frame                                  | Uncorrected Seroprevalence (95% Confidence Interval) | Test Manufacturers   Names   Isotypes                                           | Test Sens, Spec (Source)                          | Corrected Seroprevalence (95% Credible Interval) |
|-----------------------------------------------------------|--------------------------|-----------------------------|------------------|----------------------|-------------|-----------------------|------------|-----------------|-----------------------------------------------|------------------------------------------------------|---------------------------------------------------------------------------------|---------------------------------------------------|--------------------------------------------------|
| Iwuiji (Texas Tech University) <sup>419</sup>             | 2020-05-12 to 2020-05-13 | Texas   Lubbock             | Local            | High                 | 683         | 18-76                 | NR         | Non-probability | Essential non-healthcare workers              | 0.7%                                                 | Abbott   Abbott SARS-CoV-2 IgG   IgG                                            | 0.4%, 1.0% (FINDDx / MUHC independent evaluation) | -                                                |
| Tilley (University of Southern California) <sup>422</sup> | 2020-04-29 to 2020-05-08 | California   Los Angeles    | Sublocal         | Moderate             | 790         | NR                    | 48.2       | Non-probability | Students and Daycares                         | 4.0% (3.0-5.1%)                                      | EUROIMMUN   EUROIMMUN Anti-SARS-CoV-2 ELISA (IgG)   IgG                         | 90.0%, 100.0% (Used author-adjusted estimate)     | 4.0% (2.7-5.5%)                                  |
| Hunter (Indiana University) <sup>423</sup>                | 2020-04-29 to 2020-05-08 | Indiana   Indianapolis      | Regional         | High                 | 734         | Mean 42.8 (NR)        | 70.0       | Non-probability | Health care workers and caregivers            | 1.6%                                                 | Abbott   Abbott Architect SARS-CoV-2 IgG assay   IgG                            | 0.4%, 1.0% (FINDDx / MUHC independent evaluation) | -                                                |
| Racine-Brzostek (Weill Cornell Medicine) <sup>425</sup>   | 2020-04-17 to 2020-05-07 | New York   New York City    | Local            | Moderate             | 2274        | Median 37 (IQR 31-48) | 63.3       | Non-probability | Health care workers and caregivers            | 35.4%                                                | ET Healthcare   SARS-CoV-2 cyclic enhanced fluorescence assay (CEFA)   IgG, IgM | 0.6%, 1.0% (FINDDx / MUHC independent evaluation) | -                                                |
| Regan (Fellowship Village) <sup>426</sup>                 | 2020-04-15 to 2020-05-06 | New Jersey   Basking Ridge  | Sublocal         | Unclear              | 371         | NR                    | NR         | Probability     | Assisted living and long-term care facilities | 34.8%                                                | NR   NR   IgG, IgM                                                              | No data                                           | -                                                |
| Regan (Fellowship Village) <sup>426</sup>                 | 2020-04-15 to 2020-05-06 | New Jersey   Basking Ridge  | Sublocal         | Unclear              | 305         | NR                    | NR         | Probability     | Assisted living and long-term care facilities | 23.6%                                                | NR   NR   IgG, IgM                                                              | No data                                           | -                                                |
| Sydney (Jacobi Medical Center) <sup>427</sup>             | 2020-04-28 to 2020-05-04 | New York   New York City    | Sublocal         | High                 | 1700        | NR                    | NR         | Non-probability | Health care workers and caregivers            | 19.2%                                                | Abbott   Abbott Architect SARS-CoV-2 IgG assay   IgG                            | 0.4%, 1.0% (FINDDx / MUHC independent evaluation) | -                                                |
| Reagan (Medical University South Carolina) <sup>431</sup> | 2020-04-27 to 2020-05-02 | South Carolina   Charleston | Sublocal         | High                 | 920         | NR                    | NR         | Non-probability | Multiple populations                          | 2.0%                                                 | Abbott   Not possible to determine   NR                                         | No data                                           | -                                                |

| Article Author (Study Organization)                               | Sampling Dates (YMD)     | Location                                    | Geographic Scope | Overall Risk of Bias | Sample Size | Age                                      | Female (%) | Sampling method | Sample frame                                   | Uncorrected Seroprevalence (95% Confidence Interval) | Test Manufacturers   Names   Isotypes                                          | Test Sens, Spec (Source)                                                             | Corrected Seroprevalence (95% Credible Interval) |
|-------------------------------------------------------------------|--------------------------|---------------------------------------------|------------------|----------------------|-------------|------------------------------------------|------------|-----------------|------------------------------------------------|------------------------------------------------------|--------------------------------------------------------------------------------|--------------------------------------------------------------------------------------|--------------------------------------------------|
| Venugopal (NYC Health + Hospitals/Lincoln) <sup>432</sup>         | 2020-03-01 to 2020-05-01 | New York   New York City                    | Local            | Moderate             | 500         | 20-39 (n=230), 40-59 (n=196), 60+ (n=52) | 65.8       | Non-probability | Health care workers and caregivers             | 27.0%                                                | Abbott Laboratories   Abbott Architect SARS-CoV-2 IgG Assay   IgG              | 0.4%, 1.0% (FINDDx / MUHC independent evaluation)                                    | -                                                |
| Jeremias (St Francis Hospital) <sup>433</sup>                     | 2020-03-01 to 2020-04-30 | New York   New York City                    | Sublocal         | High                 | 1699        | Mean 42.8 (SD 13.8)                      | 74.1       | Non-probability | Health care workers and caregivers             | 9.8%                                                 | EUROIMMUN ; Abbott   Euroimmun Anti-SARS-CoV-2 ELISA IgG, SARS-CoV-2 IgG   IgG | No data                                                                              | -                                                |
| Cohen (DaVita Clinical Research) <sup>434</sup>                   | 2020-04-23 to 2020-04-30 | Florida   Miami                             | Local            | High                 | 677         | Mean 65.7 (SD +/- 14.5 years)            | 41.1       | Non-probability | Patients seeking care for non-COVID-19 reasons | 5.6% (4.0-7.6%)                                      | Diazyme Laboratories Inc   DZ-Lite SARS-CoV-2 IgG IgM CLIA Kit   IgG, IgM      | 57.1%, 85.0% (Author-reported independent evaluation)                                | 2.8% (0.0-9.6%)                                  |
| Jeong (Columbia University Medical Center) <sup>435</sup>         | 2020-02-01 to 2020-04-30 | New York   New York City                    | Sublocal         | High                 | 50          | Median 35 (IQR 31-49)                    | 42.0       | Non-probability | Health care workers and caregivers             | 46.0%                                                | Abbott Laboratories   SARS-CoV-2 immunoglobulin G antibody test   IgG          | 0.4%, 1.0% (FINDDx / MUHC independent evaluation)                                    | 53.3% (39.9-66.9%)                               |
| Lewis (Centers for Disease Control) <sup>440</sup>                | 2020-03-22 to 2020-04-25 | Utah, Wisconsin   Milwaukee, Salt Lake City | Local            | High                 | 178         | Median 22 (Range <1-76)                  | 53.9       | Non-probability | Contacts of COVID patients                     | 25.8%                                                | CDC   CDC-developed SARS-CoV-2 ELISA   NR                                      | 75.6%, 97.6% (Used Bastos SR/MA data; no sens, spec, or author adjustment available) | 31.5% (22.7-40.1%)                               |
| Payne (US Navy) <sup>442</sup>                                    | 2020-04-20 to 2020-04-24 | Guam                                        | Sublocal         | High                 | 382         | Median 30 (IQR 24-35)                    | 24.3       | Non-probability | Essential non-healthcare workers               | 59.7%                                                | CDC   CDC Pan-immunoglobulin ELISA   IgG, IgA, IgM                             | 96.0%, 99.3% (Test developer / manufacturer evaluation)                              | 64.6% (56.4-75.8%)                               |
| Kiefer (Ohio State University College of Medicine) <sup>445</sup> | 2020-04-23 to 2020-04-23 | Ohio   Columbus                             | Sublocal         | High                 | 110         | Median 34 (IQR 28.8-45.0)                | 100.0      | Non-probability | Health care workers and caregivers             | 20.0%                                                | Epitope Diagnostics   Novel Coronavirus COVID-19 IgG ELISA Kit   IgG, IgM      | 0.8%, 1.0% (FINDDx / MUHC independent evaluation)                                    | -                                                |

| Article Author (Study Organization)                                  | Sampling Dates (YMD)     | Location                 | Geographic Scope | Overall Risk of Bias | Sample Size | Age                                                                      | Female (%) | Sampling method | Sample frame                                  | Uncorrected Seroprevalence (95% Confidence Interval) | Test Manufacturers   Names   Isotypes                                                                         | Test Sens, Spec (Source)                                | Corrected Seroprevalence (95% Credible Interval) |
|----------------------------------------------------------------------|--------------------------|--------------------------|------------------|----------------------|-------------|--------------------------------------------------------------------------|------------|-----------------|-----------------------------------------------|------------------------------------------------------|---------------------------------------------------------------------------------------------------------------|---------------------------------------------------------|--------------------------------------------------|
| Morcuende (Columbia University Irving Medical Center) <sup>447</sup> | 2020-03-01 to 2020-04-21 | New York   New York City | Sublocal         | High                 | 91          | NR                                                                       | 42.9       | Non-probability | Health care workers and caregivers            | 12.1%                                                | "Zhejiang Orient Gene Biotech Co.; LTD"   COVID-19 IgG / IgM Rapid Test Cassette   IgG, IgM                   | 93.1%, 99.2% (Test developer / manufacturer evaluation) | 12.1% (3.7-21.2%)                                |
| McCormack (Stanford University) <sup>448</sup>                       | 2020-04-08 to 2020-04-21 |                          | National         | Unclear              | 5603        | NR                                                                       | NR         | Non-probability | Non-essential workers and unemployed persons  | 0.7% (0.3-1.1%)                                      | NR   NR   NR                                                                                                  | No data                                                 | -                                                |
| Stock (Albert Einstein College of Medicine) <sup>450</sup>           | 2020-04-04 to 2020-04-20 | New York   New York City | Local            | High                 | 98          | Mean 37.6 (SD 10.6)                                                      | 50.0       | Non-probability | Health care workers and caregivers            | 15.3%                                                | Epitope Diagnostics   anti-n IgG ELISA   IgG                                                                  | 0.8%, 1.0% (FINDDx / MUHC independent evaluation)       | -                                                |
| Madsen (University of Utah) <sup>451</sup>                           | 2020-04-13 to 2020-04-19 | Utah   Salt Lake City    | Sublocal         | High                 | 270         | NR                                                                       | NR         | Non-probability | Health care workers and caregivers            | 5.9%                                                 | EUROIMMUN   Euroimmun Anti-SARS-CoV-2-IgG   IgG                                                               | 0.8%, 1.0% (FINDDx / MUHC independent evaluation)       | -                                                |
| Caban-Martinez (University of Miami) <sup>452</sup>                  | 2020-04-16 to 2020-04-17 | Florida                  | Sublocal         | High                 | 203         | 21-30 (n=33); 31-40 (n=51); 41-50 (n=67); 51+ (n=52)                     | 6.4        | Non-probability | Essential non-healthcare workers              | 8.9%                                                 | BioMedomics   Rapid immunoglobulin (IgM)-IgG combined point-of-care (POC) lateral flow immunoassay   IgG, IgM | 0.6%, 0.9% (FINDDx / MUHC independent evaluation)       | -                                                |
| Goldberg (Harvard Medical School) <sup>456</sup>                     | 2020-04-01 to 2020-04-06 | Massachusetts            | Sublocal         | High                 | 140         | Mean 83 (resident age); 45 (staff) (Range 54-102 (resident); NR (staff)) | NR         | Non-probability | Assisted living and long-term care facilities | 10.7%                                                | BioMedomics   COVID-19 IgM-IgG Dual Antibody Rapid Test   IgG, IgM                                            | 0.6%, 0.9% (FINDDx / MUHC independent evaluation)       | -                                                |
| Mansour (Icahn School of Medicine at                                 | 2020-03-24 to 2020-04-04 | New York   New York City | Local            | High                 | 285         | Mean 38.36 (NR)                                                          | 33.3       | Non-probability | Health care workers and caregivers            | 32.6%                                                | NR   NR   IgG                                                                                                 | 75.6%, 97.6% (Used Bastos SR/MA data; no sens, spec,    | 40.9% (33.2-48.6%)                               |



| Article Author (Study Organization)                                      | Sampling Dates (YMD)     | Location                       | Geographic Scope | Overall Risk of Bias | Sample Size | Age                    | Female (%) | Sampling method | Sample frame                                   | Uncorrected Seroprevalence (95% Confidence Interval) | Test Manufacturers   Names   Isotypes                                                                                                      | Test Sens, Spec (Source)                                                             | Corrected Seroprevalence (95% Credible Interval) |
|--------------------------------------------------------------------------|--------------------------|--------------------------------|------------------|----------------------|-------------|------------------------|------------|-----------------|------------------------------------------------|------------------------------------------------------|--------------------------------------------------------------------------------------------------------------------------------------------|--------------------------------------------------------------------------------------|--------------------------------------------------|
| Mount Sinai) <sup>458</sup>                                              |                          |                                |                  |                      |             |                        |            |                 |                                                |                                                      |                                                                                                                                            | or author adjustment available)                                                      |                                                  |
| McPherson (US Centers for Disease Control and Prevention) <sup>460</sup> | 2020-03-03 to 2020-03-06 | Illinois                       | Sublocal         | High                 | 59          | Median 39 (IQR 32-54)  | 79.7       | Non-probability | Contacts of COVID patients                     | 0.0%                                                 | CDC   SARS-CoV-2 spike enzyme-linked immunosorbent assay   IgG, IgA, IgM                                                                   | 96.0%, 99.0% (Test developer / manufacturer evaluation)                              | 1.3% (0.0-5.5%)                                  |
| Chu (US Centers for Disease Control and Prevention) <sup>461</sup>       | 2020-01-20 to 2020-02-03 | Washington                     | Regional         | High                 | 32          | Median 45 (Range 0-78) | NR         | Non-probability | Contacts of COVID patients                     | 0.0%                                                 | Author-designed   CDC SARS-CoV-2 ELISA   NR                                                                                                | 96.0%, 99.0% (Test developer / manufacturer evaluation)                              | 2.3% (0.0-9.6%)                                  |
| <b>Latin America and Caribbean</b>                                       |                          |                                |                  |                      |             |                        |            |                 |                                                |                                                      |                                                                                                                                            |                                                                                      |                                                  |
| <b>Brazil</b>                                                            |                          |                                |                  |                      |             |                        |            |                 |                                                |                                                      |                                                                                                                                            |                                                                                      |                                                  |
| Santana (Clínica de Reumatologia) <sup>464</sup>                         | 2020-03-15 to 2020-08-15 | State of Sao Paulo   São Paulo | Local            | High                 | 100         | Mean 46.5 (SD 14.2)    | 85.0       | Non-probability | Patients seeking care for non-COVID-19 reasons | 21.0%                                                | Snibe Diagnostics   MAGLUMI anti-SARS-CoV-2 IgG/IgM   IgG, IgM                                                                             | 97.8%, 97.8% (Used Bastos SR/MA data; no sens, spec, or author adjustment available) | 20.2% (12.2-28.4%)                               |
| Silva (Adolfo Lutz Central Institute) <sup>467</sup>                     | 2020-06-05 to 2020-07-31 | State of Sao Paulo   Sao Paulo | Sublocal         | High                 | 406         | Median 50 (IQR 40-57)  | 72.9       | Non-probability | Multiple populations                           | 8.6%                                                 | Ltd.; Switzerland; China; Roche Diagnostics; Rotkreuz; Guangzhou Wondfo Biotech Co.   SARS-CoV-2 Wondfo; Elecys Anti-SARS-CoV-2   IgG, IgM | No data                                                                              | -                                                |
| Melo (Federal University of Sergipe) <sup>469</sup>                      | 2020-06-01 to 2020-06-30 | Sergipe                        | Regional         | High                 | 471         | NR                     | NR         | Non-probability | Health care workers and caregivers             | 13.6%                                                | Boditech Med Inc.   Ichroma COVID-19 Ab Test   IgG                                                                                         | 95.8%, 97.0% (Author-reported independent evaluation)                                | 10.7% (5.8-15.5%)                                |

| Article Author (Study Organization)                                     | Sampling Dates (YMD)     | Location                               | Geographic Scope | Overall Risk of Bias | Sample Size | Age                                                                                                    | Female (%) | Sampling method | Sample frame                                 | Uncorrected Seroprevalence (95% Confidence Interval) | Test Manufacturers   Names   Isotypes                                       | Test Sens, Spec (Source)                                                             | Corrected Seroprevalence (95% Credible Interval) |
|-------------------------------------------------------------------------|--------------------------|----------------------------------------|------------------|----------------------|-------------|--------------------------------------------------------------------------------------------------------|------------|-----------------|----------------------------------------------|------------------------------------------------------|-----------------------------------------------------------------------------|--------------------------------------------------------------------------------------|--------------------------------------------------|
| Costa (Faculdade De Medicina da Universidade) <sup>475</sup>            | 2020-05-14 to 2020-05-28 | São Paulo State   São Paulo            | Sublocal         | Moderate             | 4987        | <30 (n=1512), 31-40 (n=1539), 51-60 (n=636), 61+ (n=150)                                               | 72.9       | Non-probability | Health care workers and caregivers           | 14.1% (13.1-15.0%)                                   | Wondfo-China   Rapid Chromatographic Immunoassay   IgG, IgM                 | 0.7%, 1.0% (FINDDx / MUHC independent evaluation)                                    | -                                                |
| Silva (Centro de Terapia Oncológica) <sup>482</sup>                     | 2020-04-09 to 2020-04-29 | Rio de Janeiro   Petrópolis            | Sublocal         | High                 | 61          | NR                                                                                                     | NR         | Non-probability | Health care workers and caregivers           | 4.9%                                                 | NR   NR   IgG, IgM                                                          | 66.0%, 96.6% (Used Bastos SR/MA data; no sens, spec, or author adjustment available) | 3.4% (0.0-11.5%)                                 |
| <b>Columbia</b>                                                         |                          |                                        |                  |                      |             |                                                                                                        |            |                 |                                              |                                                      |                                                                             |                                                                                      |                                                  |
| Ariza (Pontificia Universidad Javeriana) <sup>486</sup>                 | 2020-06-25 to 2020-08-10 | Capital District Cundinamarca   Bogotá | Sublocal         | High                 | 351         | Median 31.5 (Seronegative); 29.4 (Seropositive) (IQR 27.5-38.6 (Seronegative); 26.9-37 (Seropositive)) | 58.7       | Non-probability | Health care workers and caregivers           | 8.3% (5.8-11.6%)                                     | Columbia SD Biosensor; Abbott   Abbott Architect SARS-CoV-2 IgG assay   IgG | 0.4%, 1.0% (FINDDx / MUHC independent evaluation)                                    | -                                                |
| Idrovo (Universidad Industrial de Santander) <sup>487</sup>             | 2020-04-17 to 2020-07-14 |                                        | National         | High                 | 4234        | NR                                                                                                     | NR         | Non-probability | Non-essential workers and unemployed persons | 4.0%                                                 | NR   NR   IgG, IgM                                                          | 66.0%, 96.6% (Used Bastos SR/MA data; no sens, spec, or author adjustment available) | 1.0% (0.0-2.1%)                                  |
| <b>Cuba</b>                                                             |                          |                                        |                  |                      |             |                                                                                                        |            |                 |                                              |                                                      |                                                                             |                                                                                      |                                                  |
| Giraldoni (University of Medical Sciences of Cienfuegos) <sup>488</sup> | 2020-03-23 to 2020-04-06 | Cienfuegos   Aguada de Pasajeros       | Local            | Unclear              | 200         | NR                                                                                                     | NR         | Non-probability | Contacts of COVID patients                   | 0.0%                                                 | NR   NR   IgG, IgM                                                          | No data                                                                              | <b>215</b>                                       |
| <b>Mexico</b>                                                           |                          |                                        |                  |                      |             |                                                                                                        |            |                 |                                              |                                                      |                                                                             |                                                                                      |                                                  |
| Cruz-Arenas (Instituto Nacional de                                      | 2020-08-10 to 2020-09-09 | Mexico City                            | Sublocal         | Moderate             | 300         | < 30 (n=41); 30-44 (n=124); 45-59                                                                      | 65.0       | Probability     | Health care workers and caregivers           | 11.0%                                                | ; Hangzhou Biotest Biotech Co. Ltd.                                         | 1.0%, 1.0% (FINDDx / MUHC                                                            | -                                                |

| Article Author (Study Organization)                                                                                  | Sampling Dates (YMD)     | Location                  | Geographic Scope | Overall Risk of Bias | Sample Size | Age                                  | Female (%) | Sampling method | Sample frame                       | Uncorrected Seroprevalence (95% Confidence Interval) | Test Manufacturers   Names   Isotypes                                                          | Test Sens, Spec (Source)                                | Corrected Seroprevalence (95% Credible Interval) |
|----------------------------------------------------------------------------------------------------------------------|--------------------------|---------------------------|------------------|----------------------|-------------|--------------------------------------|------------|-----------------|------------------------------------|------------------------------------------------------|------------------------------------------------------------------------------------------------|---------------------------------------------------------|--------------------------------------------------|
| Rehabilitacion) <sup>494</sup>                                                                                       |                          |                           |                  |                      |             | (n = 114) ;<br>60+ (n = 7)           |            |                 |                                    |                                                      | COVID-19 IgG/IgM Rapid Test Cassette   IgG, IgM                                                | independent evaluation)                                 |                                                  |
| Díaz-Salazar (Universidad Autónoma de Nuevo Leon) <sup>497</sup>                                                     | 2020-07-09 to 2020-07-23 | Nuevo Leon   Guadalupe    | Local            | Moderate             | 3268        | Median 40 (IQR 3-49)                 | 38.6       | Non-probability | Multiple populations               | 5.7% (4.9-6.6%)                                      | Roche elecsys   Elecsys Anti-SARS-CoV-2 Roche COBAS e801   IgG, IgM                            | 99.5%, 99.8% (Used author-adjusted estimate)            | 5.7% (4.9-6.5%)                                  |
| <b>Panama</b>                                                                                                        |                          |                           |                  |                      |             |                                      |            |                 |                                    |                                                      |                                                                                                |                                                         |                                                  |
| Villarreal (Instituto de Investigaciones Científicas y Servicios de Alta Tecnología (INDICASAT -AIP)) <sup>498</sup> | 2020-04-30 to 2020-07-07 | Colon, Panama             | National         | High                 | 351         | Mean 39.5 (SD 11.5)                  | 67.8       | Non-probability | Health care workers and caregivers | 12.8% (8.6-15.4%)                                    | N/A - Author Designed   Chinese Academy of Science Test (CAST)   IgG, IgM                      | 87.0%, 98.9% (Test developer / manufacturer evaluation) | 12.8% (5.8-18.6%)                                |
| <b>Peru</b>                                                                                                          |                          |                           |                  |                      |             |                                      |            |                 |                                    |                                                      |                                                                                                |                                                         |                                                  |
| Álvarez-Antonio (Universidad de Ingeniería y Tecnología) <sup>500</sup>                                              | 2020-07-15 to 2020-08-15 | Iquitos                   | Local            | Low                  | 1337        | Mean 29.2 (Range 3 months - 89)      | NR         | Probability     | Multiple populations               | 68.1% (65.6-70.6%)                                   | China); Zhejiang Orient Gene (Biotech Co LTD   COVID-19 IgG/IgM Rapid Test Cassette   IgG, IgM | 95.8%, 100.0% (Used author-adjusted estimate)           | 68.1% (65.6-70.6%)                               |
| <b>North Africa and Middle East</b>                                                                                  |                          |                           |                  |                      |             |                                      |            |                 |                                    |                                                      |                                                                                                |                                                         |                                                  |
| <b>Egypt</b>                                                                                                         |                          |                           |                  |                      |             |                                      |            |                 |                                    |                                                      |                                                                                                |                                                         |                                                  |
| Kassem (Cairo University) <sup>503</sup>                                                                             | 2020-06-01 to 2020-06-14 | Cairo                     | Local            | High                 | 74          | Median 32 (Range 23-48)              | 59.5       | Non-probability | Health care workers and caregivers | 12.2%                                                | Artron Laboratories   COVID-19 IgM/IgG antibody rapid diagnostic test   IgG, IgM               | 0.4%, 1.0% (FINDDx / MUHC independent evaluation)       | -                                                |
| Mostafa (Ain Shams University) <sup>504</sup>                                                                        | 2020-04-22 to 2020-05-14 | Cairo Governorate   Cairo | Local            | High                 | 4040        | 18-24 (n=603); 25-29 (n=1279); 30-39 | 61.5       | Non-probability | Health care workers and caregivers | 1.3%                                                 | Artron Laboratories   Artron One Step COVID-19                                                 | 0.4%, 1.0% (FINDDx / MUHC                               | -                                                |

| Article Author (Study Organization)                                                      | Sampling Dates (YMD)        | Location                                                                                                                                                                                           | Geographic Scope | Overall Risk of Bias | Sample Size | Age                                                                                                                      | Female (%) | Sampling method     | Sample frame                               | Uncorrected Seroprevalence (95% Confidence Interval) | Test Manufacturers   Names   Isotypes                                                   | Test Sens, Spec (Source)                                                                               | Corrected Seroprevalence (95% Credible Interval) |
|------------------------------------------------------------------------------------------|-----------------------------|----------------------------------------------------------------------------------------------------------------------------------------------------------------------------------------------------|------------------|----------------------|-------------|--------------------------------------------------------------------------------------------------------------------------|------------|---------------------|--------------------------------------------|------------------------------------------------------|-----------------------------------------------------------------------------------------|--------------------------------------------------------------------------------------------------------|--------------------------------------------------|
|                                                                                          |                             |                                                                                                                                                                                                    |                  |                      |             | (n=1057);<br>40-49<br>(n=700);<br>>=50<br>(n=401)                                                                        |            |                     |                                            |                                                      | IgM/IgG<br>Antibody Test  <br>IgG, IgM                                                  | independent<br>evaluation)                                                                             |                                                  |
| <b>Iran</b>                                                                              |                             |                                                                                                                                                                                                    |                  |                      |             |                                                                                                                          |            |                     |                                            |                                                      |                                                                                         |                                                                                                        |                                                  |
| Poustchi (Teheran University of Medical Sciences) <sup>505</sup>                         | 2020-04-17 to<br>2020-06-02 | Kerman,<br>Shiraz,<br>Esfahan ,<br>Urmia,<br>Tehran, Sari,<br>Ahvaz,<br>Zahedan,<br>Qom,<br>Ardabil,<br>Hamedan,<br>Sanandaj,<br>Kermanshah,<br>Mashhad,<br>Gorgan,<br>Tabriz,<br>Babol ,<br>Rasht | National         | Moderate             | 5372        | ≤19 (n = 11);<br>20–29 (n =<br>770); 30–39<br>(n = 2003);<br>40–49 (n =<br>1675); 50–59<br>(n =749);<br>≥60 (n =<br>164) | NR         | Probability         | Multiple<br>populations                    | 14.9% (13.8-<br>16.0%)                               | Pishtaz Teb  <br>PT-SARS-<br>COV-2.IgM-96<br>and PT-SARS-<br>COV-2.IgG-96  <br>IgG, IgM | 66.9%, 98.2%<br>(Author-<br>reported<br>independent<br>evaluation)                                     | 19.4% (14.1-<br>23.7%)                           |
| Saberian (Teheran University of Medical Sciences) <sup>506</sup>                         | 2020-03-20 to<br>2020-05-20 | Tehran  <br>Tehran                                                                                                                                                                                 | Sublocal         | High                 | 243         | Mean 36.14<br>(SD 8.70)                                                                                                  | 12.3       | Non-<br>probability | Essential<br>non-<br>healthcare<br>workers | 41.6%                                                | KarmaAzmaAn<br>dish Co.  <br>COVID-19<br>IgM/IgG rapid<br>test   IgG, IgM               | 71.1%, 58.7%<br>(Test<br>developer /<br>manufacturer<br>evaluation)                                    | 13.4% (0.0-<br>46.8%)                            |
| Armin (High Institute for Research and Education in Transfusion Medicine) <sup>507</sup> | 2020-04-20 to<br>2020-05-05 | Tehran  <br>Tehran                                                                                                                                                                                 | Sublocal         | High                 | 475         | <40 (n=238),<br>40-62 (n=97)                                                                                             | 81.5       | Non-<br>probability | Health care<br>workers and<br>caregivers   | 29.4%                                                | Hangzhou<br>AllTest Biotech<br>Co.   Rapid Test<br>Dipstick   IgG,<br>IgM               | 0.6%, 1.0%<br>(FINDDx /<br>MUHC<br>independent<br>evaluation)                                          | -                                                |
| Vazirinejad (University of Pecs) <sup>508</sup>                                          | 2020-03-01 to<br>2020-04-30 | Kerman                                                                                                                                                                                             | Local            | High                 | 238         | Mean 30.77<br>(SD 19.3)                                                                                                  | 54.2       | Non-<br>probability | Contacts of<br>COVID<br>patients           | 15.6%                                                | NR   NR   IgG,<br>IgM                                                                   | No data                                                                                                | -                                                |
| Ossareh (Iran University of Medical Sciences) <sup>510</sup>                             | 2020-02-20 to<br>2020-03-20 | Tehran  <br>Tehran                                                                                                                                                                                 | Sublocal         | High                 | 178         | Mean 58.9<br>(SD 16.5)                                                                                                   | 31.5       | Non-<br>probability | Multiple<br>populations                    | 18.0%                                                | Pishtaz<br>Diagnostics<br>Iran   ELISA<br>Pishtaz Teb<br>Diagnostics<br>Iran   IgG, IgM | 75.6%, 97.6%<br>(Used Bastos<br>SR/MA data;<br>no sens, spec,<br>or author<br>adjustment<br>available) | 20.7% (13.5-<br>28.7%)                           |

| Article Author (Study Organization)                           | Sampling Dates (YMD)     | Location              | Geographic Scope | Overall Risk of Bias | Sample Size | Age                                                       | Female (%) | Sampling method | Sample frame                                 | Uncorrected Seroprevalence (95% Confidence Interval) | Test Manufacturers   Names   Isotypes                                               | Test Sens, Spec (Source)                                | Corrected Seroprevalence (95% Credible Interval) |
|---------------------------------------------------------------|--------------------------|-----------------------|------------------|----------------------|-------------|-----------------------------------------------------------|------------|-----------------|----------------------------------------------|------------------------------------------------------|-------------------------------------------------------------------------------------|---------------------------------------------------------|--------------------------------------------------|
| <b>Kuwait</b>                                                 |                          |                       |                  |                      |             |                                                           |            |                 |                                              |                                                      |                                                                                     |                                                         |                                                  |
| Alali (University of Kuwait) <sup>511</sup>                   | 2020-05-23 to 2020-06-26 |                       | National         | High                 | 525         | Median 43 (NR)                                            | 0.0        | Probability     | Essential non-healthcare workers             | 38.1% (34.0-42.3%)                                   | Biozek Medical; Netherlands   COVID-19 Rapid Test Cassette   IgG, IgM               | 66.0%, 97.0% (Test developer / manufacturer evaluation) | 58.9% (42.4-83.2%)                               |
| <b>Libya</b>                                                  |                          |                       |                  |                      |             |                                                           |            |                 |                                              |                                                      |                                                                                     |                                                         |                                                  |
| Kammon (Al-Zintan University) <sup>512</sup>                  | 2020-04-02 to 2020-05-18 | Libya   Alzintan City | Local            | High                 | 142         | <=40 (n = 78); >40 (n = 64)                               | 65.5       | Probability     | Multiple populations                         | 4.2%                                                 | Guangzhou Wondfo Biotech   One Step Novel COVID-19 IgM/IgG Antibody Test   IgG, IgM | 0.4%, 1.0% (FINDDx / MUHC independent evaluation)       | -                                                |
| Kammon (Al-Zintan University) <sup>512</sup>                  | 2020-04-02 to 2020-05-18 | Libya   Alzintan City | Local            | High                 | 77          | <=40 (n = 59); >40 (n = 18)                               | 29.9       | Probability     | Health care workers and caregivers           | 0.0%                                                 | Guangzhou Wondfo Biotech   One Step Novel COVID-19 IgM/IgG Antibody Test   IgG, IgM | 0.4%, 1.0% (FINDDx / MUHC independent evaluation)       | -                                                |
| <b>Qatar</b>                                                  |                          |                       |                  |                      |             |                                                           |            |                 |                                              |                                                      |                                                                                     |                                                         |                                                  |
| Jeremijenko (Cornell University) <sup>514</sup>               | 2020-06-21 to 2020-09-09 |                       | National         | High                 | 4970        | <29 (n=1579), 30-39 (n=1973), 40-49 (n=1040), 50+ (n=339) | 5.0        | Non-probability | Non-essential workers and unemployed persons | 64.4% (63.0-65.7%)                                   | Roche Diagnostics   Roche Elecsys® Anti-SARS-CoV-2   NR                             | 0.9%, 1.0% (FINDDx / MUHC independent evaluation)       | -                                                |
| MohamedH.A l-Thani (Ministry of Public Health) <sup>515</sup> | 2020-07-26 to 2020-09-09 |                       | National         | Moderate             | 2641        | Median 35 (Range 18-80)                                   | NR         | Probability     | Non-essential workers and unemployed persons | 55.3% (53.3-57.3%)                                   | Switzerland; Roche   Roche Elecsys Anti-SARS-CoV-2   NR                             | 0.9%, 1.0% (FINDDx / MUHC independent evaluation)       | 45.3% (42.0-49.7%)                               |
| Nasrallah (Cornell University - Qatar) <sup>516</sup>         | 2020-07-26 to 2020-09-09 |                       | National         | High                 | 394         | NR                                                        | NR         | Non-probability | Essential non-healthcare workers             | 40.6% (35.9-45.5%)                                   | France; BioMérieux; Marcy-l'Etoile                                                  | 88.6%, 99.9% (Test developer /                          | 46.3% (37.0-56.9%)                               |

| Article Author (Study Organization)                                       | Sampling Dates (YMD)     | Location                                                                                                           | Geographic Scope | Overall Risk of Bias | Sample Size | Age                                               | Female (%) | Sampling method | Sample frame                       | Uncorrected Seroprevalence (95% Confidence Interval) | Test Manufacturers   Names   Isotypes                                         | Test Sens, Spec (Source)                                                             | Corrected Seroprevalence (95% Credible Interval) |
|---------------------------------------------------------------------------|--------------------------|--------------------------------------------------------------------------------------------------------------------|------------------|----------------------|-------------|---------------------------------------------------|------------|-----------------|------------------------------------|------------------------------------------------------|-------------------------------------------------------------------------------|--------------------------------------------------------------------------------------|--------------------------------------------------|
|                                                                           |                          |                                                                                                                    |                  |                      |             |                                                   |            |                 |                                    |                                                      | BioMérieux VidasIII   IgG                                                     | manufacturer evaluation)                                                             |                                                  |
| <b>Saudi Arabia</b>                                                       |                          |                                                                                                                    |                  |                      |             |                                                   |            |                 |                                    |                                                      |                                                                               |                                                                                      |                                                  |
| Alharbi (King Fahad General Hospital) <sup>518</sup>                      | 2020-04-18 to 2020-06-17 | Hejaz   Madinah                                                                                                    | Local            | High                 | 330         | NR                                                | NR         | Non-probability | Health care workers and caregivers | 24.2%                                                | Vircell Microbiologists   IgM/IgA Kit #MA1032, IgG Kit #G1032   IgG, IgA, IgM | 75.6%, 97.6% (Used Bastos SR/MA data; no sens, spec, or author adjustment available) | 29.4% (23.2-36.2%)                               |
| Alserehi (Saudi Center for Disease Prevention and Control) <sup>519</sup> | 2020-05-20 to 2020-05-30 | Qassim, Emirate of the Eastern Province, Baha, Najran, Norther Border, Jazan, Madinah, Riyadh, Makkah, Hail, Aseer | National         | Moderate             | 12621       | NR                                                | NR         | Non-probability | Health care workers and caregivers | 2.4%                                                 | Abbott Laboratories   Abbott Architect SARS-CoV-2 IgG   IgG                   | 0.4%, 1.0% (FINDDx / MUHC independent evaluation)                                    | -                                                |
| <b>Turkey</b>                                                             |                          |                                                                                                                    |                  |                      |             |                                                   |            |                 |                                    |                                                      |                                                                               |                                                                                      |                                                  |
| Alkurt (University of Health Sciences) <sup>521</sup>                     | 2020-05-30 to 2020-06-06 | Istanbul, Darica                                                                                                   | Local            | Moderate             | 813         | Mean 34.8 (SD 9.54)                               | 64.0       | Non-probability | Health care workers and caregivers | 2.7%                                                 | Abbott   Abbott Architect SARS-CoV-2 IgG assay   IgG                          | 0.4%, 1.0% (FINDDx / MUHC independent evaluation)                                    | -                                                |
| <b>South Asia</b>                                                         |                          |                                                                                                                    |                  |                      |             |                                                   |            |                 |                                    |                                                      |                                                                               |                                                                                      |                                                  |
| <b>India</b>                                                              |                          |                                                                                                                    |                  |                      |             |                                                   |            |                 |                                    |                                                      |                                                                               |                                                                                      |                                                  |
| Goenka (Apollo Gleneagles Hospitals) <sup>528</sup>                       | 2020-08-01 to 2020-08-31 | West Bengal   Kolkata                                                                                              | Sublocal         | High                 | 117         | <30 (n=57); 31-40 (n=35); 41-50 (n=19); >50 (n=6) | 47.0       | Non-probability | Health care workers and caregivers | 32.5%                                                | Ortho Clinical Diagnostics   Vitros ECi IgG assay   IgG                       | 0.8%, 1.0% (FINDDx / MUHC independent evaluation)                                    | -                                                |
| Goenka (Apollo Gleneagles Hospitals) <sup>532</sup>                       | 2020-07-12 to 2020-08-23 | West Bengal   Kolkata                                                                                              | Sublocal         | Moderate             | 1122        | <30 (n=364); 30-50 (n=665); >50 (n=93)            | 34.6       | Probability     | Health care workers and caregivers | 11.9%                                                | Ortho Clinical Diagnostics   Vitros anti-SARS-COV-2 IgG   IgG                 | 0.8%, 1.0% (FINDDx / MUHC independent evaluation)                                    | -                                                |

| Article Author (Study Organization)                                                         | Sampling Dates (YMD)     | Location              | Geographic Scope | Overall Risk of Bias | Sample Size | Age                                                                                 | Female (%) | Sampling method | Sample frame                       | Uncorrected Seroprevalence (95% Confidence Interval) | Test Manufacturers   Names   Isotypes                                                                     | Test Sens, Spec (Source)                                                             | Corrected Seroprevalence (95% Credible Interval) |
|---------------------------------------------------------------------------------------------|--------------------------|-----------------------|------------------|----------------------|-------------|-------------------------------------------------------------------------------------|------------|-----------------|------------------------------------|------------------------------------------------------|-----------------------------------------------------------------------------------------------------------|--------------------------------------------------------------------------------------|--------------------------------------------------|
| Siddiqui (Max Super Specialty Hospital) <sup>534</sup>                                      | 2020-04-15 to 2020-08-15 | NCT Delhi   New Delhi | Local            | High                 | 780         | 18-20 (n=19); 21-30 (n=239); 31-40 (n=204); 41-50 (n=139); 51-60 (n=74); >60 (n=33) | 29.4       | Non-probability | Multiple populations               | 19.5%                                                | Roche Diagnostics   Elecsys Anti-SARS-CoV-2 kit   NR                                                      | 0.7%, 1.0% (FINDDx / MUHC independent evaluation)                                    | -                                                |
| Kumar (Amrita Institute of Medical Sciences & Research Centre) <sup>540</sup>               | 2020-07-11 to 2020-07-24 | Kerala                | Sublocal         | High                 | 635         | Mean 34.8 (Range 19-70)                                                             | NR         | Non-probability | Health care workers and caregivers | 0.2%                                                 | Roche Diagnostics   ElecsysR Anti-SARS-CoV-2 total antibodies assay   NR                                  | 0.9%, 1.0% (FINDDx / MUHC independent evaluation)                                    | -                                                |
| Malani (Tata Institute for Fundamental Research) <sup>541</sup>                             | 2020-06-29 to 2020-07-19 | Mumbai                | Local            | Low                  | 4202        | 12-24 (n=702), 25-39 (n=1480), 40-60 (n=1695), 61+ (n=325)                          | 54.3       | Probability     | Persons living in slums            | 54.1% (52.7-55.5%)                                   | Abbott Laboratories   Abbott Diagnostics Architect   IgG                                                  | 0.4%, 1.0% (FINDDx / MUHC independent evaluation)                                    | 45.1% (42.7-47.3%)                               |
| Unclear (Ahmedabad Municipal Corporation) <sup>546</sup>                                    | 2020-06-16 to 2020-07-11 | Gujarat   Ahmedabad   | Local            | Unclear              | 30054       | NR                                                                                  | NR         | Non-probability | Multiple populations               | 17.6%                                                | NR   NR   NR                                                                                              | No data                                                                              | -                                                |
| Kumar (Postgraduate Institute of Medical Education and Research) <sup>549</sup>             | 2020-06-01 to 2020-06-30 | Maharashtra   Mumbai  | Local            | High                 | 801         | 20-40 (n=413); 40-60 (n=380); >=60 (n=8)                                            | 48.2       | Non-probability | Health care workers and caregivers | 11.1% (9.1-13.5%)                                    | Roche Diagnostics   Elecsys Anti-SARS-CoV-2 Assay   NR                                                    | 0.9%, 1.0% (FINDDx / MUHC independent evaluation)                                    | -                                                |
| Singhal (Kokilaben Dhirubhai Ambani Hospital and Medical Research Institute) <sup>550</sup> | 2020-06-01 to 2020-06-30 | Maharashtra   Mumbai  | Sublocal         | High                 | 208         | NR                                                                                  | NR         | Non-probability | Health care workers and caregivers | 12.5%                                                | 1) Abbott 2) Roche   Architect, Abbott, USA, and later in the study by Elecsys®, Roche, Switzerland.   NR | 97.8%, 97.8% (Used Bastos SR/MA data; no sens, spec, or author adjustment available) | 11.1% (6.4-16.0%)                                |

| Article Author (Study Organization)                                                    | Sampling Dates (YMD)     | Location                           | Geographic Scope | Overall Risk of Bias | Sample Size | Age                                                                                                                                                                | Female (%) | Sampling method | Sample frame                       | Uncorrected Seroprevalence (95% Confidence Interval) | Test Manufacturers   Names   Isotypes                                                                   | Test Sens, Spec (Source)                          | Corrected Seroprevalence (95% Credible Interval) |
|----------------------------------------------------------------------------------------|--------------------------|------------------------------------|------------------|----------------------|-------------|--------------------------------------------------------------------------------------------------------------------------------------------------------------------|------------|-----------------|------------------------------------|------------------------------------------------------|---------------------------------------------------------------------------------------------------------|---------------------------------------------------|--------------------------------------------------|
| Khan (Government Medical College) <sup>551</sup>                                       | 2020-06-15 to 2020-06-29 | Kashmir                            | Local            | Moderate             | 2905        | Mean 38.6 (NR)                                                                                                                                                     | 35.8       | Non-probability | Health care workers and caregivers | 2.5% (2.0-3.1%)                                      | Abbott Laboratories   NR   IgG                                                                          | 0.4%, 1.0% (FINDDx / MUHC independent evaluation) | -                                                |
| Rao (Sri Jayadeva Institute of Cardiovascular Sciences and Research) <sup>553</sup>    | 2020-05-23 to 2020-06-06 | Karnataka   Bengaluru              | Sublocal         | Unclear              | 1000        | 30-40 (n=1000)                                                                                                                                                     | 45.0       | Non-probability | Health care workers and caregivers | 1.0%                                                 | New Life Healthcare   NR   IgG                                                                          | No data                                           | -                                                |
| <b>Pakistan</b>                                                                        |                          |                                    |                  |                      |             |                                                                                                                                                                    |            |                 |                                    |                                                      |                                                                                                         |                                                   |                                                  |
| Zaidi (National Institute of Blood Diseases and Bone Marrow Transplant) <sup>557</sup> | 2020-05-15 to 2020-07-15 | Karachi                            | Local            | High                 | 1675        | 18-60                                                                                                                                                              | NR         | Non-probability | Multiple populations               | 36.0%                                                | Roche Diagnostics   electrochemiluminescence immunoassay analyzer method on Cobas e-411   IgG, IgA, IgM | 0.6%, 1.0% (FINDDx / MUHC independent evaluation) | -                                                |
| Noor (Hayatabad Medical Complex) <sup>559</sup>                                        | 2020-07-13 to 2020-07-15 | Khyber Pakhtunkhwa   Peshawar      | Sublocal         | Moderate             | 1011        | Mean 33.25 (COVID-19 receiving hospital); 33.94 (Non-COVID-19 receiving hospital) (SD 8.71 (COVID-19 receiving hospital); 11.77 (Non-COVID-19 receiving hospital)) | 31.9       | Probability     | Health care workers and caregivers | 30.8%                                                | Roche   Elecsys® Anti-SARS-CoV-2 immunoassay   IgG, IgM                                                 | 0.8%, 1.0% (FINDDx / MUHC independent evaluation) | -                                                |
| Haq (Riphah International University) <sup>560</sup>                                   | 2020-06-15 to 2020-06-29 | Khyber Pakhtunkhwa   Peshawar City | Local            | Moderate             | 1011        | Mean 33.6 (SD 10.5)                                                                                                                                                | 31.9       | Non-probability | Health care workers and caregivers | 30.7% (27.8-33.6%)                                   | Roche Diagnostics   Elecsys® Anti-SARS-CoV-2 antibody test   NR                                         | 0.9%, 1.0% (FINDDx / MUHC independent evaluation) | -                                                |
| Chughtai (Chughtai)                                                                    | 2020-05-20 to 2020-05-30 | Lahore                             | Local            | High                 | 154         | Mean 27.1 (SD 3.8)                                                                                                                                                 | 0.0        | Non-probability | Essential non-                     | 15.6%                                                | Abbott   Abbott Architect                                                                               | 0.4%, 1.0% (FINDDx /                              | -                                                |



| Article Author (Study Organization)                                                  | Sampling Dates (YMD)     | Location                         | Geographic Scope | Overall Risk of Bias | Sample Size | Age                      | Female (%) | Sampling method | Sample frame                                   | Uncorrected Seroprevalence (95% Confidence Interval) | Test Manufacturers   Names   Isotypes                                         | Test Sens, Spec (Source)                                                             | Corrected Seroprevalence (95% Credible Interval) |
|--------------------------------------------------------------------------------------|--------------------------|----------------------------------|------------------|----------------------|-------------|--------------------------|------------|-----------------|------------------------------------------------|------------------------------------------------------|-------------------------------------------------------------------------------|--------------------------------------------------------------------------------------|--------------------------------------------------|
| Institute of Pathology) <sup>561</sup>                                               |                          |                                  |                  |                      |             |                          |            |                 | healthcare workers                             |                                                      | SARS-CoV-2 IgG assay   IgG                                                    | MUHC independent evaluation)                                                         |                                                  |
| <b>Southeast Asia, East Asia, And Oceania</b>                                        |                          |                                  |                  |                      |             |                          |            |                 |                                                |                                                      |                                                                               |                                                                                      |                                                  |
| <b>China</b>                                                                         |                          |                                  |                  |                      |             |                          |            |                 |                                                |                                                      |                                                                               |                                                                                      |                                                  |
| Li (Fudan University) <sup>562</sup>                                                 | 2020-05-15 to 2020-10-15 | Shanghai Municipality   Shanghai | Sublocal         | High                 | 6414        | NR                       | NR         | Non-probability | Patients seeking care for non-COVID-19 reasons | 0.3%                                                 | Bioscience   NR   IgG, IgM                                                    | 0.6%, 1.0% (FINDDx / MUHC independent evaluation)                                    | -                                                |
| He (Wuhan University) <sup>564</sup>                                                 | 2020-05-13 to 2020-06-10 | Hubei   Wuhan                    | Sublocal         | High                 | 1059        | Median 32.69 (NR)        | 75.3       | Non-probability | Health care workers and caregivers             | 9.3%                                                 | Livzon Diagnostics   Diagnostic Kit for IgM/IgG Antibody to Coronavirus   IgG | 0.7%, 1.0% (FINDDx / MUHC independent evaluation)                                    | -                                                |
| He (Renmin Hospital of Wuhan University) <sup>565</sup>                              | 2020-05-15 to 2020-05-29 | Hubei   Wuhan                    | Sublocal         | Unclear              | 4614        | Median 36.86 (SD 10.644) | 70.3       | Non-probability | Health care workers and caregivers             | 3.3%                                                 | Livzon Diagnostics Inc.   Diagnostic Kit for IgM/IgG Antibody   IgG           | 0.5%, 0.6% (FINDDx / MUHC independent evaluation)                                    | -                                                |
| Tong (Nanjing University Medical School) <sup>568</sup>                              | 2020-05-12 to 2020-05-15 | Hubei   Wuhan                    | Local            | High                 | 191         | Mean 32 (Range 24-58)    | 70.2       | Non-probability | Health care workers and caregivers             | 0.0%                                                 | Shenzhen YHLO Biotech Co   NR   IgG                                           | 0.7%, 1.0% (FINDDx / MUHC independent evaluation)                                    | -                                                |
| Liang (The First Affiliated Hospital of Guangzhou Medical University) <sup>569</sup> | 2020-01-20 to 2020-04-30 | Guangdong   Guangzhou            | Local            | High                 | 8782        | Median 54 (IQR 44-62)    | 51.6       | Non-probability | Multiple populations                           | 0.6%                                                 | Shenzhen YHLO Biotech Co   SARS-CoV-2 IgM/IgG CLIA kits   IgG, IgM            | 97.8%, 97.8% (Used Bastos SR/MA data; no sens, spec, or author adjustment available) | 0.0% (0.0-0.1%)                                  |
| Liang (The First Affiliated Hospital of Guangzhou Medical University) <sup>569</sup> | 2020-01-19 to 2020-04-30 | Hubei   Wuhan                    | Local            | High                 | 8272        | Median 55 (IQR 38-67)    | 50.0       | Non-probability | Multiple populations                           | 2.1%                                                 | Innovita   2019-nCoV Ab Test (Colloidal Gold)   IgG, IgM                      | 0.6%, 1.0% (FINDDx / MUHC independent evaluation)                                    | -                                                |

| Article Author (Study Organization)                                      | Sampling Dates (YMD)     | Location                                                                                  | Geographic Scope | Overall Risk of Bias | Sample Size | Age                                    | Female (%) | Sampling method | Sample frame                                   | Uncorrected Seroprevalence (95% Confidence Interval) | Test Manufacturers   Names   Isotypes                                     | Test Sens, Spec (Source)                                                             | Corrected Seroprevalence (95% Credible Interval) |
|--------------------------------------------------------------------------|--------------------------|-------------------------------------------------------------------------------------------|------------------|----------------------|-------------|----------------------------------------|------------|-----------------|------------------------------------------------|------------------------------------------------------|---------------------------------------------------------------------------|--------------------------------------------------------------------------------------|--------------------------------------------------|
| Liu (Zhongnan Hospital of Wuhan University) <sup>571</sup>               | 2020-02-29 to 2020-04-29 | Hubei   Wuhan                                                                             | Local            | Moderate             | 3832        | Mean 37.1 (95% CI 36.7-37.4)           | 32.3       | Non-probability | Health care workers and caregivers             | 4.0% (3.4-4.7%)                                      | YHLO   SARS-CoV-2 IgM/IgG CLIA kits   IgG                                 | 0.7%, 1.0% (FINDDx / MUHC independent evaluation)                                    | -                                                |
| Lei ( Tongji Medical College) <sup>572</sup>                             | 2020-02-17 to 2020-04-28 | Hubei   Wuhan                                                                             | Local            | High                 | 11766       | NR                                     | NR         | Non-probability | Multiple populations                           | 0.5%                                                 | YHLO   YHLO Biotech SARS-CoV-2 IgM/IgG Test   IgG, IgM                    | 66.7%, 99.5% (Test developer / manufacturer evaluation)                              | 0.3% (0.0-0.7%)                                  |
| Want (Huazhong University of Science and Technology) <sup>574</sup>      | 2020-01-23 to 2020-04-24 | Hubei   Xiangyang, Wuhan                                                                  | Local            | Unclear              | 299         | Median 5.2 (Range 2 months - 16 years) | 58.9       | Non-probability | Patients seeking care for non-COVID-19 reasons | 0.0%                                                 | NR   NR   IgG, IgM                                                        | 97.8%, 97.8% (Used Bastos SR/MA data; no sens, spec, or author adjustment available) | 0.2% (0.0-1.0%)                                  |
| Liu (Sun Yat-sen University) <sup>575</sup>                              | 2020-02-07 to 2020-04-21 | Hubei   Wuhan                                                                             | Local            | High                 | 420         | Mean 35.8 (NR)                         | 68.1       | Non-probability | Health care workers and caregivers             | 0.0%                                                 | YHLO   SARS-CoV-2 IgM/IgG CLIA kits   IgG                                 | 1.0%, 1.0% (FINDDx / MUHC independent evaluation)                                    | -                                                |
| Wu (Wuhan University) <sup>577</sup>                                     | 2020-04-03 to 2020-04-15 | Hubei   Wuhan                                                                             | Sublocal         | High                 | 1021        | NR                                     | NR         | Non-probability | Essential non-healthcare workers               | 9.6%                                                 | Innovita Biological Technology Co. Ltd   2019-nCoV Ab Test   IgG, IgM     | 0.6%, 1.0% (FINDDx / MUHC independent evaluation)                                    | -                                                |
| Xu (National Clinical Research Centre for Kidney Disease) <sup>578</sup> | 2020-03-09 to 2020-04-10 | Hubei, Sichuan, Guangdong   Chengdu, Wuhan, Guangzhou                                     | National         | High                 | 10449       | Median 50 (IQR 35-49)                  | 52.3       | Non-probability | Multiple populations                           | 0.8%                                                 | Bioscience   Magnetic Chemiluminescence Enzyme Immunoassay Kit   IgG, IgM | 97.8%, 97.8% (Used Bastos SR/MA data; no sens, spec, or author adjustment available) | 0.0% (0.0-0.1%)                                  |
| Xu (National Clinical Research Centre for Kidney Disease) <sup>578</sup> | 2020-03-09 to 2020-04-10 | Hubei, Sichuan, Guangdong   Jinzhou, Chongqing, Foshan, Chengdu, Honghu, Wuhan, Guangzhou | National         | High                 | 6919        | Median 41 (IQR 31-56)                  | 63.1       | Non-probability | Multiple populations                           | 2.5%                                                 | Bioscience   Magnetic Chemiluminescence Enzyme Immunoassay Kit   IgG, IgM | 97.8%, 97.8% (Used Bastos SR/MA data; no sens, spec, or author adjustment available) | 0.3% (0.0-0.8%)                                  |

| Article Author (Study Organization)                                    | Sampling Dates (YMD)     | Location             | Geographic Scope | Overall Risk of Bias | Sample Size | Age                                         | Female (%) | Sampling method | Sample frame                                   | Uncorrected Seroprevalence (95% Confidence Interval) | Test Manufacturers   Names   Isotypes                                                                                   | Test Sens, Spec (Source)                                                             | Corrected Seroprevalence (95% Credible Interval) |
|------------------------------------------------------------------------|--------------------------|----------------------|------------------|----------------------|-------------|---------------------------------------------|------------|-----------------|------------------------------------------------|------------------------------------------------------|-------------------------------------------------------------------------------------------------------------------------|--------------------------------------------------------------------------------------|--------------------------------------------------|
| Zhang (Huazhong University of Science and Technology) <sup>580</sup>   | 2020-01-23 to 2020-03-27 | Hubei   Wuhan        | Sublocal         | High                 | 44          | Median 6 (Range 1-15)                       | 38.6       | Non-probability | Patients seeking care for non-COVID-19 reasons | 0.0%                                                 | NR   NR   IgG, IgM                                                                                                      | 97.8%, 97.8% (Used Bastos SR/MA data; no sens, spec, or author adjustment available) | 1.6% (0.0-6.6%)                                  |
| Zhou (Zhongnan Hospital of Wuhan University) <sup>581</sup>            | 2020-03-16 to 2020-03-25 | Hubei   Wuhan        | Sublocal         | Moderate             | 3674        | 18-30 (n=1378); 31-50 (n=1656); >50 (n=640) | 67.7       | Non-probability | Health care workers and caregivers             | 1.7%                                                 | Shenzhen Yahuilong Biotechnology Co.   COVID-19 IgM/IgG chemiluminescence test kit   IgG                                | 0.9%, 1.0% (FINDDx / MUHC independent evaluation)                                    | -                                                |
| Li (National Center for Medical Service Administration) <sup>582</sup> | 2020-02-10 to 2020-03-22 | Hubei   Wuhan        | Sublocal         | High                 | 300         | Mean 46.3 (SD 10.3)                         | NR         | Non-probability | Contacts of COVID patients                     | 47.7%                                                | Innovita Biological Technology Co. Ltd   NR   IgG, IgM                                                                  | 0.6%, 1.0% (FINDDx / MUHC independent evaluation)                                    | 52.2% (46.7-57.6%)                               |
| Tang (Tongji Medical College) <sup>583</sup>                           | 2020-03-08 to 2020-03-21 | Hubei   Wuhan        | Local            | Moderate             | 1027        | Mean 60.3 (SD 13.4)                         | 39.7       | Non-probability | Patients seeking care for non-COVID-19 reasons | 4.6%                                                 | Ltd."; "Tangshan Yingnuote Biotechnology Enterprise Co.   Tangshan Colloidal Gold Immunochromatography Assay   IgG, IgM | 0.9%, 1.0% (FINDDx / MUHC independent evaluation)                                    | -                                                |
| Tu (Wuhan Institute of Virology) <sup>584</sup>                        | 2020-03-19 to 2020-03-20 | Hubei   Wuhan        | Sublocal         | High                 | 325         | NR                                          | NR         | Probability     | Health care workers and caregivers             | 24.3%                                                | Zhu Hai Livzon Diagnostics Ins   Zhu Hai Livzon ELISA   IgG                                                             | 0.7%, 1.0% (FINDDx / MUHC independent evaluation)                                    | -                                                |
| Zhang (Shenzhen Second People's Hospital) <sup>585</sup>               | 2020-02-29 to 2020-03-18 | Guangdong   Shenzhen | Local            | High                 | 1589        | Mean 36.4 (Range 11-89)                     | NR         | Non-probability | Non-essential workers and unemployed persons   | 0.4%                                                 | Shenzhen Sciarray Biotech Ltd   shenzhen ELISA   IgG                                                                    | 75.6%, 97.6% (Used Bastos SR/MA data; no sens, spec, or author adjustment available) | 0.1% (0.0-0.3%)                                  |

| Article Author (Study Organization)                                   | Sampling Dates (YMD)     | Location            | Geographic Scope | Overall Risk of Bias | Sample Size | Age                     | Female (%) | Sampling method | Sample frame                       | Uncorrected Seroprevalence (95% Confidence Interval) | Test Manufacturers   Names   Isotypes                                        | Test Sens, Spec (Source)                                                             | Corrected Seroprevalence (95% Credible Interval) |
|-----------------------------------------------------------------------|--------------------------|---------------------|------------------|----------------------|-------------|-------------------------|------------|-----------------|------------------------------------|------------------------------------------------------|------------------------------------------------------------------------------|--------------------------------------------------------------------------------------|--------------------------------------------------|
| Xiong (Huazhong University of Science and Technology) <sup>586</sup>  | 2020-02-12 to 2020-03-17 | Hubei   Wuhan       | Local            | Unclear              | 797         | Median 31 (Range 23-53) | 88.5       | Non-probability | Health care workers and caregivers | 4.4%                                                 | NR   NR   IgG                                                                | 75.6%, 97.6% (Used Bastos SR/MA data; no sens, spec, or author adjustment available) | 2.5% (0.6-4.8%)                                  |
| Zhao (Renmin Hospital of Wuhan University) <sup>588</sup>             | 2020-01-14 to 2020-02-21 | Hubei   Wuhan       | Sublocal         | High                 | 1060        | NR                      | NR         | Non-probability | Health care workers and caregivers | 8.3%                                                 | Shenzhen YHLO Biotech Co   NR   IgG, IgM                                     | 97.8%, 97.8% (Used Bastos SR/MA data; no sens, spec, or author adjustment available) | 6.3% (4.6-8.2%)                                  |
| Chen (Nanjing University Medical School) <sup>589</sup>               | 2020-02-19 to 2020-02-19 | Jiangsu   Nanjing   | Local            | High                 | 105         | Median 30 (IQR 26-62)   | 79.0       | Non-probability | Health care workers and caregivers | 17.1%                                                | Author-designed   N/A - Author-designed   IgG, IgM                           | 93.3%, 100.0% (Test developer / manufacturer evaluation)                             | 17.5% (10.1-26.2%)                               |
| Zhang (Shengjing Hospital of China Medical University) <sup>590</sup> | 2020-01-21 to 2020-02-16 | Liaoning   Shenyang | Regional         | High                 | 63          | Median 40 (Range 25-61) | 88.9       | Non-probability | Health care workers and caregivers | 0.0%                                                 | Shenzhen Yahuilong Biotechnology Co.   Chemiluminescence Detection Kit   IgG | 0.9%, 1.0% (FINDDx / MUHC independent evaluation)                                    | -                                                |
| <b>Thailand</b>                                                       |                          |                     |                  |                      |             |                         |            |                 |                                    |                                                      |                                                                              |                                                                                      |                                                  |
| Nopsopon (Chulalongkorn University) <sup>593</sup>                    | 2020-04-08 to 2020-06-26 |                     | National         | Moderate             | 857         | Median 37 (IQR 27-45)   | 74.7       | Non-probability | Multiple populations               | 5.5% (4.1-7.2%)                                      | Baiya Phytopharm   Baiya Rapid COVID-19 IgG/IgM Test Kit   IgM               | 94.1%, 98.0% (Author-reported independent evaluation)                                | 3.5% (0.4-6.1%)                                  |
| Nopsopon (Chulalongkorn University) <sup>594</sup>                    | 2020-04-17 to 2020-05-17 | Ranong              | Sublocal         | Moderate             | 844         | Median 42 (IQR 32-50)   | 71.7       | Non-probability | Health care workers and caregivers | 0.8% (0.4-1.7%)                                      | Baya Phytopharm; Thailand   Baya Rapid IgG/IgM test kit   IgG, IgM           | 94.1%, 98.0% (Test developer / manufacturer evaluation)                              | 0.3% (0.0-0.9%)                                  |
| <b>Vietnam</b>                                                        |                          |                     |                  |                      |             |                         |            |                 |                                    |                                                      |                                                                              |                                                                                      |                                                  |

| Article Author (Study Organization)                                                   | Sampling Dates (YMD)     | Location                          | Geographic Scope | Overall Risk of Bias | Sample Size | Age                     | Female (%) | Sampling method | Sample frame                                 | Uncorrected Seroprevalence (95% Confidence Interval) | Test Manufacturers   Names   Isotypes                                | Test Sens, Spec (Source)                                | Corrected Seroprevalence (95% Credible Interval) |
|---------------------------------------------------------------------------------------|--------------------------|-----------------------------------|------------------|----------------------|-------------|-------------------------|------------|-----------------|----------------------------------------------|------------------------------------------------------|----------------------------------------------------------------------|---------------------------------------------------------|--------------------------------------------------|
| Chau (Oxford University Clinical Research Unit) <sup>595</sup>                        | 2020-08-23 to 2020-08-30 | Đông Nam Bộ   Ho Chi Minh City    | Sublocal         | High                 | 408         | Median 32 (Range 20-60) | 64.7       | Non-probability | Health care workers and caregivers           | 0.0%                                                 | Roche Diagnostics   Elecsys Anti-SARS-CoV-2 assay   NR               | 0.9%, 1.0% (FINDDx / MUHC independent evaluation)       | -                                                |
| <b>Sub-Saharan Africa</b>                                                             |                          |                                   |                  |                      |             |                         |            |                 |                                              |                                                      |                                                                      |                                                         |                                                  |
| <b>Malawi</b>                                                                         |                          |                                   |                  |                      |             |                         |            |                 |                                              |                                                      |                                                                      |                                                         |                                                  |
| Chibwana (Malawi-Liverpool-Wellcome Trust Clinical Research Programme) <sup>600</sup> | 2020-05-22 to 2020-06-19 | Southern Region Malawi   Blantyre | National         | High                 | 500         | Median 31 (Range 20-64) | 52.8       | Non-probability | Health care workers and caregivers           | 16.8%                                                | Omega diagnostics   COVID-19 IgG ELISA   IgG                         | 88.1%, 93.2% (Test developer / manufacturer evaluation) | 11.3% (1.9-19.1%)                                |
| <b>Nigeria</b>                                                                        |                          |                                   |                  |                      |             |                         |            |                 |                                              |                                                      |                                                                      |                                                         |                                                  |
| Asuquo (Joseph Ukpo Hospitals and Research Institutes) <sup>602</sup>                 | 2020-06-17 to 2020-06-24 | Cross River State   Calabar       | Sublocal         | High                 | 66          | NR                      | 42.4       | Non-probability | Multiple populations                         | 26.0%                                                | Healgen Scientific   COVID-19 IgG / IgM Rapid Test Cassette   IgG    | 1.0%, 1.0% (FINDDx / MUHC independent evaluation)       | -                                                |
| <b>South Africa</b>                                                                   |                          |                                   |                  |                      |             |                         |            |                 |                                              |                                                      |                                                                      |                                                         |                                                  |
| Shaw (Stellenbosch University) <sup>603</sup>                                         | 2020-08-17 to 2020-09-04 | Cape Town                         | Sublocal         | High                 | 405         | Median 38 (Range 18-69) | 53.6       | Non-probability | Essential non-healthcare workers             | 23.7%                                                | Abbott Laboratories   Abbott SARS-CoV-2 IgG assay   IgG              | 0.4%, 1.0% (FINDDx / MUHC independent evaluation)       | -                                                |
| <b>Togo</b>                                                                           |                          |                                   |                  |                      |             |                         |            |                 |                                              |                                                      |                                                                      |                                                         |                                                  |
| Halatoko (Universite de Lome) <sup>605</sup>                                          | 2020-04-23 to 2020-05-08 | Lome                              | Local            | High                 | 955         | Median 36 (IQR 32-43)   | 28.4       | Non-probability | Non-essential workers and unemployed persons | 0.9% (0.4-1.8%)                                      | "Hangzhou Clongene Biotech Co; Ltd."   Lungene Rapid Test   IgG, IgM | 0.7%, 0.9% (FINDDx / MUHC independent evaluation)       | -                                                |

**S3 Table. Risk of bias results for each included study**

| Article Author<br>(Study Organization)                  | Sampling End<br>Date<br>(YMD) | Item 1:<br>Appropriate<br>sample frame* | Item 2:<br>Probability<br>sampling<br>method | Item 3:<br>Adequate<br>sample size | Item 4:<br>Subjects &<br>setting<br>described | Item 5: Good<br>coverage of<br>sample | Item 6: Sens ><br>90% & spec ><br>95% | Item 7: Same<br>tests for all<br>subjects | Item 8:<br>Appropriate<br>analysis | Item 9:<br>Adequate<br>response rate | Overall Risk of<br>Bias <sup>†</sup> |
|---------------------------------------------------------|-------------------------------|-----------------------------------------|----------------------------------------------|------------------------------------|-----------------------------------------------|---------------------------------------|---------------------------------------|-------------------------------------------|------------------------------------|--------------------------------------|--------------------------------------|
| <b>Central Europe, Eastern Europe, and Central Asia</b> |                               |                                         |                                              |                                    |                                               |                                       |                                       |                                           |                                    |                                      |                                      |
| <b>Armenia</b>                                          |                               |                                         |                                              |                                    |                                               |                                       |                                       |                                           |                                    |                                      |                                      |
| Grigoryan                                               | 2020-06-29                    | Yes                                     | Unclear                                      | No                                 | No                                            | Unclear                               | Yes                                   | Yes                                       | No                                 | Unclear                              | High                                 |
| <b>Bulgaria</b>                                         |                               |                                         |                                              |                                    |                                               |                                       |                                       |                                           |                                    |                                      |                                      |
| Tsaneva-Damyanova                                       | 2020-04-20                    | Yes                                     | No                                           | No                                 | No                                            | Unclear                               | No                                    | Yes                                       | No                                 | Unclear                              | High                                 |
| <b>Croatia</b>                                          |                               |                                         |                                              |                                    |                                               |                                       |                                       |                                           |                                    |                                      |                                      |
| Vince                                                   | 2020-07-31                    | Yes                                     | No                                           | No                                 | Yes                                           | Unclear                               | Yes                                   | Yes                                       | No                                 | Yes                                  | Moderate                             |
| Lapic                                                   | 2020-05-31                    | No                                      | Unclear                                      | Yes                                | Yes                                           | Yes                                   | Yes                                   | Yes                                       | No                                 | Unclear                              | Moderate                             |
| Vilibic-Cavlek                                          | 2020-05-24                    | Yes                                     | No                                           | No                                 | Yes                                           | Yes                                   | Unclear                               | Yes                                       | No                                 | Unclear                              | High                                 |
| Jerkovic                                                | 2020-04-28                    | Yes                                     | No                                           | Yes                                | Yes                                           | No                                    | Yes                                   | Yes                                       | No                                 | Unclear                              | High                                 |
| <b>Czechia</b>                                          |                               |                                         |                                              |                                    |                                               |                                       |                                       |                                           |                                    |                                      |                                      |
| Bloomfield                                              | 2020-08-19                    | Yes                                     | No                                           | No                                 | Yes                                           | Unclear                               | Yes                                   | Yes                                       | No                                 | Unclear                              | High                                 |
| Malickova                                               | 2020-04-15                    | Yes                                     | Unclear                                      | No                                 | Yes                                           | Yes                                   | Unclear                               | Yes                                       | No                                 | Unclear                              | Unclear                              |
| <b>Estonia</b>                                          |                               |                                         |                                              |                                    |                                               |                                       |                                       |                                           |                                    |                                      |                                      |
| Jogi                                                    | 2020-07-31                    | Yes                                     | Yes                                          | Yes                                | Yes                                           | Yes                                   | Yes                                   | Yes                                       | No                                 | No                                   | Moderate                             |
| Jogi                                                    | 2020-07-31                    | Yes                                     | Yes                                          | Yes                                | Yes                                           | Yes                                   | Yes                                   | Yes                                       | No                                 | No                                   | Moderate                             |
| Veerus                                                  | 2020-06-10                    | No                                      | No                                           | No                                 | No                                            | Unclear                               | Yes                                   | Yes                                       | No                                 | Unclear                              | High                                 |
| <b>Georgia</b>                                          |                               |                                         |                                              |                                    |                                               |                                       |                                       |                                           |                                    |                                      |                                      |
| Tsertsvadze                                             | 2020-05-27                    | Yes                                     | No                                           | Yes                                | Yes                                           | Yes                                   | Yes                                   | Yes                                       | Yes                                | Yes                                  | Moderate                             |

| Article Author<br>(Study Organization) | Sampling End<br>Date<br>(YMD) | Item 1:<br>Appropriate<br>sample frame* | Item 2:<br>Probability<br>sampling<br>method | Item 3:<br>Adequate<br>sample size | Item 4:<br>Subjects &<br>setting<br>described | Item 5: Good<br>coverage of<br>sample | Item 6: Sens ><br>90% & spec ><br>95% | Item 7: Same<br>tests for all<br>subjects | Item 8:<br>Appropriate<br>analysis | Item 9:<br>Adequate<br>response rate | Overall Risk of<br>Bias† |
|----------------------------------------|-------------------------------|-----------------------------------------|----------------------------------------------|------------------------------------|-----------------------------------------------|---------------------------------------|---------------------------------------|-------------------------------------------|------------------------------------|--------------------------------------|--------------------------|
| <b>Hungary</b>                         |                               |                                         |                                              |                                    |                                               |                                       |                                       |                                           |                                    |                                      |                          |
| Merkely                                | 2020-05-16                    | Yes                                     | Yes                                          | Yes                                | Yes                                           | Yes                                   | Unclear                               | Yes                                       | No                                 | No                                   | Moderate                 |
| <b>Poland</b>                          |                               |                                         |                                              |                                    |                                               |                                       |                                       |                                           |                                    |                                      |                          |
| Ciechanowicz                           | 2020-10-31                    | Yes                                     | No                                           | No                                 | Yes                                           | Yes                                   | Yes                                   | Yes                                       | No                                 | Yes                                  | High                     |
| Kasztelewicz                           | 2020-08-09                    | Yes                                     | No                                           | Yes                                | Yes                                           | Unclear                               | Yes                                   | Yes                                       | No                                 | Yes                                  | Moderate                 |
| Gujski                                 | 2020-07-08                    | Yes                                     | Yes                                          | Yes                                | Yes                                           | Unclear                               | Yes                                   | Yes                                       | No                                 | No                                   | Moderate                 |
| <b>Romania</b>                         |                               |                                         |                                              |                                    |                                               |                                       |                                       |                                           |                                    |                                      |                          |
| MedLife (MedLife)                      | 2020-04-21                    | Yes                                     | Unclear                                      | No                                 | No                                            | Unclear                               | Unclear                               | No                                        | No                                 | Unclear                              | Unclear                  |
| <b>Russian Federation</b>              |                               |                                         |                                              |                                    |                                               |                                       |                                       |                                           |                                    |                                      |                          |
| Popova                                 | 2020-07-19                    | Yes                                     | Yes                                          | Yes                                | Yes                                           | Unclear                               | Unclear                               | Yes                                       | No                                 | Unclear                              | Moderate                 |
| Popova                                 | 2020-07-11                    | Yes                                     | Yes                                          | Yes                                | Yes                                           | Unclear                               | Unclear                               | Yes                                       | Unclear                            | Unclear                              | Unclear                  |
| Popova                                 | 2020-06-26                    | Yes                                     | Yes                                          | Yes                                | Yes                                           | Unclear                               | Unclear                               | Yes                                       | No                                 | Yes                                  | High                     |
| Barchuk                                | 2020-06-26                    | Yes                                     | Yes                                          | Yes                                | Yes                                           | Yes                                   | Yes                                   | Yes                                       | Yes                                | No                                   | Low                      |
| Popova                                 | 2020-06-20                    | Yes                                     | Yes                                          | Yes                                | No                                            | Unclear                               | Unclear                               | Yes                                       | No                                 | Yes                                  | High                     |
| Popova                                 | 2020-06-20                    | Yes                                     | Yes                                          | Yes                                | No                                            | Unclear                               | Unclear                               | Unclear                                   | No                                 | No                                   | High                     |
| Tickle                                 | 2020-06-18                    | Yes                                     | Yes                                          | Yes                                | No                                            | Unclear                               | Unclear                               | Unclear                                   | No                                 | Unclear                              | High                     |
| Krechetova                             | 2020-06-15                    | No                                      | Unclear                                      | Yes                                | Unclear                                       | Unclear                               | Unclear                               | Yes                                       | No                                 | Unclear                              | Unclear                  |
| Kiselyov                               | 2020-06-10                    | Yes                                     | Unclear                                      | Yes                                | No                                            | Unclear                               | Yes                                   | Yes                                       | No                                 | Unclear                              | Moderate                 |
| <b>High-income</b>                     |                               |                                         |                                              |                                    |                                               |                                       |                                       |                                           |                                    |                                      |                          |
| <b>Andorra</b>                         |                               |                                         |                                              |                                    |                                               |                                       |                                       |                                           |                                    |                                      |                          |
| Royo-Cebrecos                          | 2020-05-28                    | Yes                                     | No                                           | Yes                                | Yes                                           | Yes                                   | Yes                                   | Yes                                       | No                                 | Yes                                  | Moderate                 |

| Article Author<br>(Study Organization) | Sampling End<br>Date<br>(YMD) | Item 1:<br>Appropriate<br>sample frame* | Item 2:<br>Probability<br>sampling<br>method | Item 3:<br>Adequate<br>sample size | Item 4:<br>Subjects &<br>setting<br>described | Item 5: Good<br>coverage of<br>sample | Item 6: Sens ><br>90% & spec ><br>95% | Item 7: Same<br>tests for all<br>subjects | Item 8:<br>Appropriate<br>analysis | Item 9:<br>Adequate<br>response rate | Overall Risk of<br>Bias† |
|----------------------------------------|-------------------------------|-----------------------------------------|----------------------------------------------|------------------------------------|-----------------------------------------------|---------------------------------------|---------------------------------------|-------------------------------------------|------------------------------------|--------------------------------------|--------------------------|
| <b>Argentina</b>                       |                               |                                         |                                              |                                    |                                               |                                       |                                       |                                           |                                    |                                      |                          |
| Munoz                                  | 2020-07-16                    | Yes                                     | Yes                                          | No                                 | Yes                                           | Yes                                   | Yes                                   | Yes                                       | No                                 | Yes                                  | Moderate                 |
| Silva                                  | 2020-07-06                    | Yes                                     | Yes                                          | Yes                                | No                                            | Yes                                   | Yes                                   | Yes                                       | No                                 | Yes                                  | Moderate                 |
| Figar                                  | 2020-07-01                    | Yes                                     | No                                           | No                                 | No                                            | Unclear                               | No                                    | Yes                                       | No                                 | Unclear                              | High                     |
| Insua                                  | 2020-06-09                    | Yes                                     | Yes                                          | No                                 | No                                            | Unclear                               | Yes                                   | Yes                                       | No                                 | Unclear                              | High                     |
| <b>Australia</b>                       |                               |                                         |                                              |                                    |                                               |                                       |                                       |                                           |                                    |                                      |                          |
| Hicks                                  | 2020-06-15                    | No                                      | Unclear                                      | Yes                                | Yes                                           | Unclear                               | Yes                                   | Yes                                       | No                                 | Unclear                              | Unclear                  |
| Macartney                              | 2020-04-10                    | Yes                                     | No                                           | Yes                                | No                                            | Yes                                   | Yes                                   | Yes                                       | No                                 | Unclear                              | Moderate                 |
| <b>Austria</b>                         |                               |                                         |                                              |                                    |                                               |                                       |                                       |                                           |                                    |                                      |                          |
| Ladage                                 | 2020-06-15                    | Yes                                     | Yes                                          | Yes                                | Yes                                           | No                                    | Unclear                               | Yes                                       | No                                 | No                                   | High                     |
| Fuereder                               | 2020-06-04                    | Yes                                     | No                                           | No                                 | Yes                                           | Unclear                               | Unclear                               | Yes                                       | No                                 | Unclear                              | High                     |
| Fuereder                               | 2020-06-04                    | Yes                                     | No                                           | No                                 | Yes                                           | Unclear                               | Unclear                               | Yes                                       | No                                 | Unclear                              | High                     |
| Hackner                                | 2020-04-30                    | No                                      | No                                           | No                                 | Yes                                           | Unclear                               | No                                    | Yes                                       | No                                 | Unclear                              | High                     |
| Knabl                                  | 2020-04-27                    | Yes                                     | Yes                                          | Yes                                | Yes                                           | Yes                                   | Yes                                   | Yes                                       | No                                 | Yes                                  | Moderate                 |
| Wagner                                 | 2020-04-17                    | No                                      | Unclear                                      | Yes                                | Yes                                           | Yes                                   | Unclear                               | Yes                                       | No                                 | Unclear                              | High                     |
| Reiter                                 | 2020-03-29                    | Yes                                     | No                                           | No                                 | Yes                                           | Unclear                               | Unclear                               | Yes                                       | No                                 | Yes                                  | High                     |
| Orth-Holler                            | 2020-03-27                    | Yes                                     | No                                           | No                                 | Yes                                           | No                                    | No                                    | Yes                                       | No                                 | Unclear                              | High                     |
| <b>Belgium</b>                         |                               |                                         |                                              |                                    |                                               |                                       |                                       |                                           |                                    |                                      |                          |
| Duysburgh                              | 2020-09-30                    | Yes                                     | Unclear                                      | Yes                                | No                                            | Unclear                               | Unclear                               | Yes                                       | No                                 | Unclear                              | Unclear                  |
| Herzog                                 | 2020-07-04                    | No                                      | No                                           | Yes                                | Yes                                           | Yes                                   | No                                    | Yes                                       | Yes                                | Unclear                              | Moderate                 |
| Blairon                                | 2020-06-19                    | Yes                                     | No                                           | Yes                                | Yes                                           | Yes                                   | Unclear                               | Yes                                       | No                                 | No                                   | High                     |



| Article Author<br>(Study Organization) | Sampling End<br>Date<br>(YMD) | Item 1:<br>Appropriate<br>sample frame* | Item 2:<br>Probability<br>sampling<br>method | Item 3:<br>Adequate<br>sample size | Item 4:<br>Subjects &<br>setting<br>described | Item 5: Good<br>coverage of<br>sample | Item 6: Sens ><br>90% & spec ><br>95% | Item 7: Same<br>tests for all<br>subjects | Item 8:<br>Appropriate<br>analysis | Item 9:<br>Adequate<br>response rate | Overall Risk of<br>Bias† |
|----------------------------------------|-------------------------------|-----------------------------------------|----------------------------------------------|------------------------------------|-----------------------------------------------|---------------------------------------|---------------------------------------|-------------------------------------------|------------------------------------|--------------------------------------|--------------------------|
| Herzog                                 | 2020-06-13                    | No                                      | No                                           | Yes                                | Yes                                           | Yes                                   | No                                    | Yes                                       | Yes                                | Unclear                              | Moderate                 |
| Herzog                                 | 2020-05-25                    | No                                      | No                                           | Yes                                | Yes                                           | Yes                                   | No                                    | Yes                                       | Yes                                | Unclear                              | Moderate                 |
| Berardis                               | 2020-05-19                    | Yes                                     | No                                           | No                                 | Yes                                           | Yes                                   | No                                    | Yes                                       | No                                 | Unclear                              | High                     |
| Martin                                 | 2020-05-18                    | Yes                                     | No                                           | No                                 | Yes                                           | Unclear                               | Unclear                               | Yes                                       | No                                 | No                                   | High                     |
| Steensels                              | 2020-04-30                    | No                                      | No                                           | Yes                                | No                                            | Yes                                   | Yes                                   | Yes                                       | Yes                                | Yes                                  | High                     |
| Herzog                                 | 2020-04-26                    | No                                      | No                                           | Yes                                | Yes                                           | Yes                                   | No                                    | Yes                                       | Yes                                | Unclear                              | Moderate                 |
| Buntinx                                | 2020-04-16                    | Yes                                     | No                                           | No                                 | No                                            | No                                    | No                                    | Yes                                       | No                                 | Yes                                  | High                     |
| Herzog                                 | 2020-04-05                    | No                                      | No                                           | Yes                                | Yes                                           | Yes                                   | No                                    | Yes                                       | Yes                                | Unclear                              | Moderate                 |
| <b>Canada</b>                          |                               |                                         |                                              |                                    |                                               |                                       |                                       |                                           |                                    |                                      |                          |
| Canadian Blood<br>Services             | 2020-11-25                    | No                                      | Yes                                          | Yes                                | Yes                                           | Yes                                   | Yes                                   | Yes                                       | Yes                                | Yes                                  | Moderate                 |
| Canadian Blood<br>Services             | 2020-10-31                    | No                                      | No                                           | Yes                                | Yes                                           | Yes                                   | Yes                                   | Yes                                       | Yes                                | Yes                                  | Moderate                 |
| Manny                                  | 2020-10-23                    | Yes                                     | No                                           | No                                 | Yes                                           | Unclear                               | No                                    | Yes                                       | No                                 | Unclear                              | High                     |
| Brousseau                              | 2020-09-24                    | No                                      | No                                           | Yes                                | Yes                                           | Yes                                   | No                                    | Yes                                       | No                                 | No                                   | High                     |
| Bolotin                                | 2020-08-21                    | No                                      | No                                           | Yes                                | No                                            | Unclear                               | No                                    | Yes                                       | No                                 | Unclear                              | High                     |
| Bolotin                                | 2020-07-31                    | No                                      | No                                           | Yes                                | No                                            | Unclear                               | No                                    | Yes                                       | No                                 | Unclear                              | High                     |
| Bardai                                 | 2020-07-27                    | Yes                                     | No                                           | No                                 | Yes                                           | No                                    | Unclear                               | Yes                                       | No                                 | Unclear                              | High                     |
| Hema-Quebec                            | 2020-07-09                    | No                                      | Yes                                          | Yes                                | No                                            | Unclear                               | Unclear                               | Unclear                                   | No                                 | Unclear                              | Unclear                  |
| Bolotin                                | 2020-06-30                    | No                                      | No                                           | Yes                                | No                                            | Unclear                               | No                                    | Yes                                       | No                                 | Unclear                              | High                     |
| Majdoubi                               | 2020-06-19                    | No                                      | No                                           | No                                 | Yes                                           | Unclear                               | Yes                                   | Yes                                       | No                                 | Unclear                              | High                     |

| Article Author<br>(Study Organization) | Sampling End<br>Date<br>(YMD) | Item 1:<br>Appropriate<br>sample frame* | Item 2:<br>Probability<br>sampling<br>method | Item 3:<br>Adequate<br>sample size | Item 4:<br>Subjects &<br>setting<br>described | Item 5: Good<br>coverage of<br>sample | Item 6: Sens ><br>90% & spec ><br>95% | Item 7: Same<br>tests for all<br>subjects | Item 8:<br>Appropriate<br>analysis | Item 9:<br>Adequate<br>response rate | Overall Risk of<br>Bias† |
|----------------------------------------|-------------------------------|-----------------------------------------|----------------------------------------------|------------------------------------|-----------------------------------------------|---------------------------------------|---------------------------------------|-------------------------------------------|------------------------------------|--------------------------------------|--------------------------|
| Canadian Blood<br>Services             | 2020-06-18                    | No                                      | Unclear                                      | Yes                                | Yes                                           | Yes                                   | Yes                                   | Yes                                       | Yes                                | Yes                                  | Moderate                 |
| Bolotin                                | 2020-05-30                    | No                                      | No                                           | Yes                                | No                                            | Unclear                               | No                                    | Yes                                       | No                                 | Unclear                              | High                     |
| Skowronski                             | 2020-05-27                    | No                                      | Yes                                          | Yes                                | Yes                                           | Yes                                   | No                                    | Yes                                       | No                                 | Unclear                              | Moderate                 |
| Vijh                                   | 2020-05-14                    | Yes                                     | No                                           | No                                 | Yes                                           | Yes                                   | Yes                                   | Yes                                       | No                                 | No                                   | High                     |
| Bolotin                                | 2020-04-30                    | No                                      | No                                           | Yes                                | No                                            | Unclear                               | No                                    | Yes                                       | No                                 | Unclear                              | High                     |
| Skowronski                             | 2020-03-13                    | No                                      | Yes                                          | Yes                                | Yes                                           | Yes                                   | No                                    | Yes                                       | No                                 | Unclear                              | Moderate                 |
| <b>Chile</b>                           |                               |                                         |                                              |                                    |                                               |                                       |                                       |                                           |                                    |                                      |                          |
| Torres                                 | 2020-05-19                    | No                                      | Yes                                          | Yes                                | Yes                                           | Yes                                   | Unclear                               | Yes                                       | No                                 | Yes                                  | High                     |
| Torres                                 | 2020-05-19                    | No                                      | Yes                                          | No                                 | Yes                                           | Yes                                   | Unclear                               | Yes                                       | No                                 | Yes                                  | High                     |
| <b>Denmark</b>                         |                               |                                         |                                              |                                    |                                               |                                       |                                       |                                           |                                    |                                      |                          |
| Laursen                                | 2020-08-10                    | No                                      | No                                           | Yes                                | Yes                                           | Yes                                   | Unclear                               | Yes                                       | No                                 | Unclear                              | High                     |
| Egerup                                 | 2020-07-03                    | No                                      | No                                           | Yes                                | Yes                                           | Unclear                               | No                                    | Yes                                       | No                                 | Unclear                              | High                     |
| Egerup                                 | 2020-07-03                    | No                                      | No                                           | Yes                                | No                                            | Unclear                               | No                                    | Yes                                       | No                                 | Yes                                  | Moderate                 |
| Egerup                                 | 2020-07-03                    | No                                      | No                                           | Yes                                | Yes                                           | Unclear                               | No                                    | Yes                                       | No                                 | Yes                                  | Moderate                 |
| Jespersen                              | 2020-06-30                    | No                                      | Unclear                                      | No                                 | No                                            | Unclear                               | Yes                                   | Yes                                       | No                                 | Unclear                              | High                     |
| Jespersen                              | 2020-06-30                    | No                                      | Unclear                                      | No                                 | No                                            | Unclear                               | Yes                                   | Yes                                       | No                                 | Unclear                              | High                     |
| Pedersen                               | 2020-06-26                    | No                                      | No                                           | Yes                                | No                                            | Unclear                               | Yes                                   | Yes                                       | Yes                                | Unclear                              | Moderate                 |
| Jespersen                              | 2020-06-19                    | No                                      | No                                           | Yes                                | Yes                                           | Yes                                   | Yes                                   | Yes                                       | No                                 | Yes                                  | Moderate                 |
| Pedersen                               | 2020-06-19                    | No                                      | Yes                                          | Yes                                | Yes                                           | Unclear                               | Yes                                   | Yes                                       | Yes                                | No                                   | Moderate                 |
| Storgaard                              | 2020-06-04                    | Yes                                     | No                                           | No                                 | Yes                                           | No                                    | Yes                                   | Yes                                       | No                                 | Unclear                              | High                     |

| Article Author<br>(Study Organization) | Sampling End<br>Date<br>(YMD) | Item 1:<br>Appropriate<br>sample frame* | Item 2:<br>Probability<br>sampling<br>method | Item 3:<br>Adequate<br>sample size | Item 4:<br>Subjects &<br>setting<br>described | Item 5: Good<br>coverage of<br>sample | Item 6: Sens ><br>90% & spec ><br>95% | Item 7: Same<br>tests for all<br>subjects | Item 8:<br>Appropriate<br>analysis | Item 9:<br>Adequate<br>response rate | Overall Risk of<br>Bias† |
|----------------------------------------|-------------------------------|-----------------------------------------|----------------------------------------------|------------------------------------|-----------------------------------------------|---------------------------------------|---------------------------------------|-------------------------------------------|------------------------------------|--------------------------------------|--------------------------|
| Freiesleben                            | 2020-05-21                    | No                                      | No                                           | No                                 | Yes                                           | No                                    | Unclear                               | Yes                                       | No                                 | Yes                                  | High                     |
| Erikstrup                              | 2020-05-03                    | No                                      | Yes                                          | Yes                                | Yes                                           | Yes                                   | Yes                                   | Yes                                       | No                                 | Yes                                  | Moderate                 |
| Iversen                                | 2020-04-22                    | Yes                                     | Yes                                          | Yes                                | Yes                                           | Yes                                   | No                                    | Yes                                       | Yes                                | Yes                                  | Low                      |
| Iversen                                | 2020-04-22                    | No                                      | No                                           | Yes                                | No                                            | Unclear                               | Yes                                   | Yes                                       | No                                 | Unclear                              | High                     |
| Freiesleben                            | 2020-04-17                    | No                                      | No                                           | Yes                                | Yes                                           | No                                    | Unclear                               | Yes                                       | No                                 | Yes                                  | High                     |
| <b>Faroe Islands</b>                   |                               |                                         |                                              |                                    |                                               |                                       |                                       |                                           |                                    |                                      |                          |
| Petersen                               | 2020-05-01                    | Yes                                     | Yes                                          | Yes                                | Yes                                           | Yes                                   | Yes                                   | Yes                                       | Yes                                | Yes                                  | Low                      |
| <b>Finland</b>                         |                               |                                         |                                              |                                    |                                               |                                       |                                       |                                           |                                    |                                      |                          |
| Kantele                                | 2020-05-15                    | Yes                                     | No                                           | Yes                                | Yes                                           | Unclear                               | No                                    | Yes                                       | No                                 | Yes                                  | High                     |
| <b>France</b>                          |                               |                                         |                                              |                                    |                                               |                                       |                                       |                                           |                                    |                                      |                          |
| Anna                                   | 2020-07-31                    | Yes                                     | No                                           | Yes                                | Yes                                           | Unclear                               | Yes                                   | Yes                                       | No                                 | Unclear                              | Moderate                 |
| Dimeglio                               | 2020-07-10                    | No                                      | No                                           | Yes                                | Yes                                           | Unclear                               | Unclear                               | Yes                                       | No                                 | No                                   | High                     |
| Roederer                               | 2020-07-02                    | Yes                                     | No                                           | Yes                                | Yes                                           | Yes                                   | Unclear                               | Yes                                       | No                                 | Unclear                              | High                     |
| Pere                                   | 2020-06-26                    | Yes                                     | No                                           | Yes                                | Yes                                           | Unclear                               | Unclear                               | Yes                                       | No                                 | Unclear                              | High                     |
| Tsatsarisa                             | 2020-06-26                    | Yes                                     | No                                           | No                                 | Yes                                           | Yes                                   | Yes                                   | Yes                                       | No                                 | Unclear                              | High                     |
| Gallais                                | 2020-06-26                    | No                                      | No                                           | No                                 | Yes                                           | Yes                                   | Yes                                   | Yes                                       | No                                 | Unclear                              | High                     |
| Carrat                                 | 2020-06-23                    | Yes                                     | Yes                                          | Yes                                | Yes                                           | Unclear                               | Yes                                   | Yes                                       | No                                 | No                                   | Moderate                 |
| Mesnil                                 | 2020-06-22                    | No                                      | No                                           | Yes                                | Yes                                           | Unclear                               | Unclear                               | Yes                                       | No                                 | Yes                                  | High                     |
| Delmas                                 | 2020-06-17                    | Yes                                     | No                                           | Yes                                | No                                            | Unclear                               | Unclear                               | Yes                                       | No                                 | Yes                                  | High                     |
| Capai                                  | 2020-06-15                    | No                                      | No                                           | Yes                                | Yes                                           | Unclear                               | No                                    | Yes                                       | No                                 | Yes                                  | Moderate                 |
| Mattern                                | 2020-05-31                    | Yes                                     | No                                           | No                                 | No                                            | No                                    | Unclear                               | Yes                                       | No                                 | Unclear                              | High                     |

| Article Author (Study Organization) | Sampling End Date (YMD) | Item 1: Appropriate sample frame* | Item 2: Probability sampling method | Item 3: Adequate sample size | Item 4: Subjects & setting described | Item 5: Good coverage of sample | Item 6: Sens > 90% & spec > 95% | Item 7: Same tests for all subjects | Item 8: Appropriate analysis | Item 9: Adequate response rate | Overall Risk of Bias† |
|-------------------------------------|-------------------------|-----------------------------------|-------------------------------------|------------------------------|--------------------------------------|---------------------------------|---------------------------------|-------------------------------------|------------------------------|--------------------------------|-----------------------|
| Bal                                 | 2020-05-28              | No                                | Unclear                             | No                           | Unclear                              | Unclear                         | Unclear                         | Yes                                 | No                           | Unclear                        | High                  |
| Vu                                  | 2020-05-17              | No                                | No                                  | Yes                          | Yes                                  | Yes                             | Yes                             | Yes                                 | Yes                          | Unclear                        | Moderate              |
| Cohen                               | 2020-05-12              | No                                | No                                  | Yes                          | Yes                                  | Unclear                         | Yes                             | Yes                                 | No                           | Unclear                        | High                  |
| Fumery                              | 2020-05-11              | No                                | No                                  | No                           | Yes                                  | Unclear                         | Yes                             | Yes                                 | No                           | Yes                            | High                  |
| Fontanet                            | 2020-04-30              | Yes                               | Yes                                 | Yes                          | Yes                                  | Yes                             | Yes                             | Yes                                 | No                           | No                             | Moderate              |
| Solodky                             | 2020-04-16              | Yes                               | No                                  | No                           | No                                   | No                              | Unclear                         | Yes                                 | No                           | Unclear                        | High                  |
| Solodky                             | 2020-04-16              | Yes                               | No                                  | No                           | No                                   | Unclear                         | Unclear                         | Yes                                 | No                           | Unclear                        | High                  |
| Vu                                  | 2020-04-12              | No                                | No                                  | Yes                          | Yes                                  | Yes                             | Yes                             | Yes                                 | Yes                          | Unclear                        | Moderate              |
| Gallian                             | 2020-04-07              | No                                | Yes                                 | Yes                          | Yes                                  | Unclear                         | Unclear                         | Yes                                 | No                           | Unclear                        | High                  |
| Grzelak                             | 2020-03-24              | No                                | No                                  | No                           | No                                   | Unclear                         | Unclear                         | Yes                                 | No                           | Unclear                        | High                  |
| Germain                             | 2020-03-16              | No                                | No                                  | No                           | Yes                                  | Yes                             | Yes                             | Yes                                 | No                           | Unclear                        | High                  |
| Vu                                  | 2020-03-15              | No                                | No                                  | Yes                          | Yes                                  | Yes                             | Yes                             | Yes                                 | Yes                          | Unclear                        | Moderate              |
| <b>Germany</b>                      |                         |                                   |                                     |                              |                                      |                                 |                                 |                                     |                              |                                |                       |
| Fuest                               | 2020-11-18              | Yes                               | Unclear                             | Yes                          | No                                   | Unclear                         | Unclear                         | Yes                                 | No                           | Unclear                        | Unclear               |
| Robert Koch Institute               | 2020-11-05              | No                                | Yes                                 | Yes                          | No                                   | Yes                             | Unclear                         | Yes                                 | No                           | Unclear                        | Moderate              |
| Armann                              | 2020-10-13              | Yes                               | Unclear                             | Yes                          | Yes                                  | Yes                             | Yes                             | Yes                                 | No                           | Unclear                        | Moderate              |
| Thielecke                           | 2020-10-02              | Yes                               | Yes                                 | Yes                          | Yes                                  | Unclear                         | Unclear                         | Yes                                 | No                           | Unclear                        | Moderate              |
| Schwarz                             | 2020-09-01              | Yes                               | No                                  | Yes                          | No                                   | Unclear                         | Unclear                         | No                                  | No                           | Unclear                        | High                  |
| Rauber                              | 2020-08-06              | No                                | No                                  | No                           | Yes                                  | Unclear                         | Yes                             | Yes                                 | No                           | Unclear                        | High                  |
| Hoffmann                            | 2020-07-31              | Yes                               | No                                  | No                           | Yes                                  | Unclear                         | Yes                             | Yes                                 | No                           | Unclear                        | High                  |
| Finkenzeller                        | 2020-07-29              | Yes                               | No                                  | Yes                          | Yes                                  | Unclear                         | Yes                             | Yes                                 | No                           | Yes                            | Moderate              |

| Article Author<br>(Study Organization) | Sampling End<br>Date<br>(YMD) | Item 1:<br>Appropriate<br>sample frame* | Item 2:<br>Probability<br>sampling<br>method | Item 3:<br>Adequate<br>sample size | Item 4:<br>Subjects &<br>setting<br>described | Item 5: Good<br>coverage of<br>sample | Item 6: Sens ><br>90% & spec ><br>95% | Item 7: Same<br>tests for all<br>subjects | Item 8:<br>Appropriate<br>analysis | Item 9:<br>Adequate<br>response rate | Overall Risk of<br>Bias† |
|----------------------------------------|-------------------------------|-----------------------------------------|----------------------------------------------|------------------------------------|-----------------------------------------------|---------------------------------------|---------------------------------------|-------------------------------------------|------------------------------------|--------------------------------------|--------------------------|
| Finkenzeller                           | 2020-07-29                    | Unclear                                 | Unclear                                      | Yes                                | Yes                                           | Unclear                               | Yes                                   | Yes                                       | No                                 | No                                   | High                     |
| Laub                                   | 2020-07-22                    | Yes                                     | No                                           | Yes                                | Yes                                           | Unclear                               | Yes                                   | Yes                                       | No                                 | Yes                                  | Moderate                 |
| Brehm                                  | 2020-07-17                    | Yes                                     | No                                           | Yes                                | Yes                                           | Yes                                   | Yes                                   | Yes                                       | No                                 | Unclear                              | Moderate                 |
| Mack                                   | 2020-06-30                    | No                                      | No                                           | Yes                                | Yes                                           | Unclear                               | No                                    | Yes                                       | No                                 | Unclear                              | High                     |
| Epstude                                | 2020-06-30                    | No                                      | No                                           | No                                 | Yes                                           | Yes                                   | Unclear                               | Yes                                       | No                                 | Unclear                              | High                     |
| Epstude                                | 2020-06-30                    | No                                      | No                                           | No                                 | Yes                                           | Yes                                   | Unclear                               | Yes                                       | No                                 | Unclear                              | High                     |
| Aziz                                   | 2020-06-30                    | No                                      | No                                           | Yes                                | Yes                                           | No                                    | Yes                                   | Yes                                       | No                                 | Yes                                  | High                     |
| Aziz                                   | 2020-06-30                    | No                                      | No                                           | No                                 | Yes                                           | No                                    | Yes                                   | Yes                                       | No                                 | Unclear                              | High                     |
| Bahrs                                  | 2020-06-19                    | No                                      | No                                           | Yes                                | Yes                                           | Unclear                               | Yes                                   | Yes                                       | No                                 | No                                   | High                     |
| Herzberg                               | 2020-06-16                    | No                                      | No                                           | Yes                                | Yes                                           | Unclear                               | Yes                                   | No                                        | No                                 | Yes                                  | High                     |
| Runkel                                 | 2020-06-15                    | No                                      | Unclear                                      | Yes                                | Yes                                           | Unclear                               | Unclear                               | Yes                                       | No                                 | Unclear                              | High                     |
| Santos-Hovener                         | 2020-06-09                    | Yes                                     | Yes                                          | Yes                                | Yes                                           | Yes                                   | No                                    | Yes                                       | Yes                                | Yes                                  | Low                      |
| Malferteiner                           | 2020-06-07                    | Yes                                     | No                                           | No                                 | Unclear                                       | Unclear                               | Unclear                               | Unclear                                   | No                                 | Unclear                              | High                     |
| Herrmann                               | 2020-06-04                    | Unclear                                 | Unclear                                      | No                                 | No                                            | Unclear                               | Yes                                   | Yes                                       | No                                 | Unclear                              | High                     |
| Fischer                                | 2020-06-03                    | No                                      | No                                           | Yes                                | No                                            | No                                    | Yes                                   | Yes                                       | No                                 | Unclear                              | High                     |
| Thieme                                 | 2020-05-31                    | Yes                                     | No                                           | No                                 | Yes                                           | Yes                                   | Unclear                               | Yes                                       | No                                 | Yes                                  | High                     |
| Erber                                  | 2020-05-29                    | No                                      | No                                           | Yes                                | Yes                                           | Yes                                   | Unclear                               | Yes                                       | No                                 | No                                   | High                     |
| Weis                                   | 2020-05-22                    | Yes                                     | No                                           | Yes                                | Yes                                           | Yes                                   | Yes                                   | Yes                                       | No                                 | Yes                                  | Moderate                 |
| Choi                                   | 2020-05-19                    | Yes                                     | Unclear                                      | No                                 | Yes                                           | Unclear                               | Unclear                               | Yes                                       | No                                 | Unclear                              | High                     |
| Weis                                   | 2020-05-16                    | Yes                                     | Yes                                          | Yes                                | Yes                                           | Yes                                   | Yes                                   | Yes                                       | No                                 | Yes                                  | Moderate                 |
| Neumann                                | 2020-05-16                    | Yes                                     | Unclear                                      | No                                 | No                                            | Unclear                               | Yes                                   | Yes                                       | No                                 | Unclear                              | High                     |

| Article Author<br>(Study Organization) | Sampling End<br>Date<br>(YMD) | Item 1:<br>Appropriate<br>sample frame* | Item 2:<br>Probability<br>sampling<br>method | Item 3:<br>Adequate<br>sample size | Item 4:<br>Subjects &<br>setting<br>described | Item 5: Good<br>coverage of<br>sample | Item 6: Sens ><br>90% & spec ><br>95% | Item 7: Same<br>tests for all<br>subjects | Item 8:<br>Appropriate<br>analysis | Item 9:<br>Adequate<br>response rate | Overall Risk of<br>Bias† |
|----------------------------------------|-------------------------------|-----------------------------------------|----------------------------------------------|------------------------------------|-----------------------------------------------|---------------------------------------|---------------------------------------|-------------------------------------------|------------------------------------|--------------------------------------|--------------------------|
| Tonshoff                               | 2020-05-15                    | Unclear                                 | Unclear                                      | Unclear                            | Unclear                                       | Unclear                               | Unclear                               | Unclear                                   | Unclear                            | Unclear                              | Moderate                 |
| Zollkau                                | 2020-05-13                    | No                                      | Unclear                                      | No                                 | Yes                                           | Unclear                               | No                                    | Yes                                       | No                                 | Unclear                              | High                     |
| Schmidt                                | 2020-04-30                    | Yes                                     | No                                           | No                                 | Yes                                           | Unclear                               | Yes                                   | Yes                                       | No                                 | Yes                                  | High                     |
| Reisinger                              | 2020-04-22                    | Yes                                     | No                                           | No                                 | Yes                                           | Unclear                               | Unclear                               | Yes                                       | No                                 | Unclear                              | High                     |
| Korth                                  | 2020-04-21                    | No                                      | No                                           | No                                 | No                                            | Unclear                               | Unclear                               | Yes                                       | No                                 | Unclear                              | High                     |
| Harsch                                 | 2020-04-21                    | Yes                                     | No                                           | No                                 | No                                            | Unclear                               | Yes                                   | Yes                                       | No                                 | No                                   | High                     |
| Behrens                                | 2020-04-17                    | No                                      | Unclear                                      | No                                 | No                                            | Unclear                               | No                                    | Yes                                       | No                                 | Unclear                              | High                     |
| Kern                                   | 2020-04-16                    | Yes                                     | Unclear                                      | Yes                                | Yes                                           | Unclear                               | Yes                                   | Yes                                       | No                                 | Unclear                              | High                     |
| Krachling                              | 2020-04-14                    | No                                      | No                                           | Yes                                | Yes                                           | No                                    | Yes                                   | Yes                                       | No                                 | Unclear                              | High                     |
| Lackermair                             | 2020-04-06                    | No                                      | No                                           | No                                 | Yes                                           | No                                    | Unclear                               | Yes                                       | No                                 | Unclear                              | High                     |
| Streeck                                | 2020-04-06                    | Yes                                     | Yes                                          | Yes                                | Yes                                           | Unclear                               | Yes                                   | Yes                                       | Yes                                | Yes                                  | Low                      |
| <b>Greece</b>                          |                               |                                         |                                              |                                    |                                               |                                       |                                       |                                           |                                    |                                      |                          |
| Tsitsilonis                            | 2020-07-15                    | Yes                                     | No                                           | Yes                                | Yes                                           | Yes                                   | Yes                                   | Yes                                       | Yes                                | Unclear                              | Moderate                 |
| Psichogiou                             | 2020-05-15                    | No                                      | No                                           | Yes                                | Yes                                           | Yes                                   | No                                    | Yes                                       | Yes                                | Yes                                  | Moderate                 |
| Vlachoyiannopoulou                     | 2020-05-10                    | Yes                                     | Unclear                                      | No                                 | Yes                                           | Unclear                               | No                                    | Yes                                       | No                                 | Unclear                              | High                     |
| Bogogiannidou                          | 2020-04-30                    | No                                      | No                                           | Yes                                | Yes                                           | Yes                                   | No                                    | Yes                                       | Yes                                | Unclear                              | Moderate                 |
| <b>Iceland</b>                         |                               |                                         |                                              |                                    |                                               |                                       |                                       |                                           |                                    |                                      |                          |
| Gudbjartsson                           | 2020-06-12                    | No                                      | Yes                                          | Yes                                | Unclear                                       | Yes                                   | Yes                                   | Yes                                       | No                                 | Unclear                              | Moderate                 |
| <b>Ireland</b>                         |                               |                                         |                                              |                                    |                                               |                                       |                                       |                                           |                                    |                                      |                          |
| Igoe                                   | 2020-07-16                    | Yes                                     | Yes                                          | Yes                                | No                                            | Unclear                               | Yes                                   | Yes                                       | No                                 | No                                   | Moderate                 |
| <b>Israel</b>                          |                               |                                         |                                              |                                    |                                               |                                       |                                       |                                           |                                    |                                      |                          |

| Article Author<br>(Study Organization) | Sampling End<br>Date<br>(YMD) | Item 1:<br>Appropriate<br>sample frame* | Item 2:<br>Probability<br>sampling<br>method | Item 3:<br>Adequate<br>sample size | Item 4:<br>Subjects &<br>setting<br>described | Item 5: Good<br>coverage of<br>sample | Item 6: Sens ><br>90% & spec ><br>95% | Item 7: Same<br>tests for all<br>subjects | Item 8:<br>Appropriate<br>analysis | Item 9:<br>Adequate<br>response rate | Overall Risk of<br>Bias† |
|----------------------------------------|-------------------------------|-----------------------------------------|----------------------------------------------|------------------------------------|-----------------------------------------------|---------------------------------------|---------------------------------------|-------------------------------------------|------------------------------------|--------------------------------------|--------------------------|
| Rabinowitz                             | 2020-08-15                    | Yes                                     | Yes                                          | Yes                                | No                                            | Yes                                   | Unclear                               | Unclear                                   | No                                 | Unclear                              | Moderate                 |
| Efrati                                 | 2020-06-02                    | Yes                                     | Yes                                          | Yes                                | No                                            | Yes                                   | Unclear                               | Unclear                                   | No                                 | Unclear                              | Moderate                 |
| <b>Italy</b>                           |                               |                                         |                                              |                                    |                                               |                                       |                                       |                                           |                                    |                                      |                          |
| Caponigro                              | 2020-10-19                    | Unclear                                 | Unclear                                      | No                                 | No                                            | Unclear                               | Yes                                   | Yes                                       | No                                 | Unclear                              | Unclear                  |
| Russo                                  | 2020-08-30                    | No                                      | No                                           | No                                 | Yes                                           | No                                    | Yes                                   | Yes                                       | No                                 | Unclear                              | High                     |
| Ralli                                  | 2020-07-31                    | Yes                                     | No                                           | No                                 | Yes                                           | Unclear                               | Unclear                               | Yes                                       | No                                 | Unclear                              | High                     |
| Italian Ministry of<br>Health          | 2020-07-15                    | Yes                                     | No                                           | Yes                                | No                                            | Unclear                               | Unclear                               | Unclear                                   | No                                 | Unclear                              | Unclear                  |
| Norsa                                  | 2020-07-10                    | No                                      | No                                           | No                                 | Yes                                           | Yes                                   | Unclear                               | Yes                                       | No                                 | Yes                                  | High                     |
| Cento                                  | 2020-07-05                    | No                                      | No                                           | Yes                                | Yes                                           | No                                    | Yes                                   | Yes                                       | No                                 | Yes                                  | Moderate                 |
| Medas                                  | 2020-06-30                    | No                                      | No                                           | No                                 | Yes                                           | Unclear                               | Unclear                               | Yes                                       | No                                 | Yes                                  | High                     |
| Berte                                  | 2020-06-15                    | No                                      | No                                           | No                                 | Yes                                           | Unclear                               | Yes                                   | Yes                                       | No                                 | Unclear                              | High                     |
| Berte                                  | 2020-06-15                    | No                                      | No                                           | No                                 | Yes                                           | Unclear                               | Yes                                   | Yes                                       | No                                 | Unclear                              | High                     |
| Capasso                                | 2020-06-15                    | Yes                                     | No                                           | No                                 | Yes                                           | Yes                                   | No                                    | Yes                                       | No                                 | Yes                                  | High                     |
| Capasso                                | 2020-06-15                    | No                                      | No                                           | Yes                                | Yes                                           | Yes                                   | No                                    | Yes                                       | No                                 | Yes                                  | Moderate                 |
| Capasso                                | 2020-06-15                    | Yes                                     | No                                           | No                                 | Yes                                           | Yes                                   | No                                    | Yes                                       | No                                 | Yes                                  | Moderate                 |
| Pagani                                 | 2020-06-07                    | Yes                                     | Yes                                          | Yes                                | Yes                                           | Yes                                   | Unclear                               | Yes                                       | No                                 | Unclear                              | Moderate                 |
| Cosma                                  | 2020-06-04                    | Yes                                     | No                                           | No                                 | No                                            | Unclear                               | Unclear                               | Yes                                       | No                                 | Unclear                              | High                     |
| Amante                                 | 2020-06-03                    | Yes                                     | Unclear                                      | Yes                                | No                                            | Yes                                   | Unclear                               | Unclear                                   | No                                 | Unclear                              | Moderate                 |
| Lorenzo                                | 2020-05-31                    | Yes                                     | No                                           | No                                 | No                                            | Unclear                               | Unclear                               | Yes                                       | No                                 | Unclear                              | High                     |
| Lastrucci                              | 2020-05-31                    | Yes                                     | No                                           | Yes                                | Yes                                           | Yes                                   | Yes                                   | Yes                                       | No                                 | Yes                                  | Moderate                 |

| Article Author (Study Organization) | Sampling End Date (YMD) | Item 1: Appropriate sample frame* | Item 2: Probability sampling method | Item 3: Adequate sample size | Item 4: Subjects & setting described | Item 5: Good coverage of sample | Item 6: Sens > 90% & spec > 95% | Item 7: Same tests for all subjects | Item 8: Appropriate analysis | Item 9: Adequate response rate | Overall Risk of Bias† |
|-------------------------------------|-------------------------|-----------------------------------|-------------------------------------|------------------------------|--------------------------------------|---------------------------------|---------------------------------|-------------------------------------|------------------------------|--------------------------------|-----------------------|
| Papalini                            | 2020-05-31              | Unclear                           | Unclear                             | Yes                          | No                                   | Unclear                         | No                              | Yes                                 | No                           | Unclear                        | Unclear               |
| Papalini                            | 2020-05-31              | No                                | No                                  | No                           | Yes                                  | Unclear                         | No                              | Yes                                 | No                           | Unclear                        | High                  |
| Fiore                               | 2020-05-31              | No                                | No                                  | Yes                          | Yes                                  | Unclear                         | No                              | Yes                                 | No                           | Yes                            | High                  |
| Sperotto                            | 2020-05-30              | Yes                               | No                                  | No                           | Yes                                  | Unclear                         | Yes                             | Yes                                 | No                           | Unclear                        | High                  |
| Stellato                            | 2020-05-29              | No                                | No                                  | No                           | No                                   | No                              | Unclear                         | No                                  | No                           | Unclear                        | High                  |
| Stellato                            | 2020-05-29              | No                                | No                                  | Yes                          | No                                   | No                              | Unclear                         | No                                  | No                           | Unclear                        | High                  |
| Plebani                             | 2020-05-29              | Yes                               | Unclear                             | Yes                          | Yes                                  | Yes                             | No                              | Yes                                 | No                           | Unclear                        | High                  |
| Poletti                             | 2020-05-25              | Yes                               | No                                  | Yes                          | Yes                                  | Unclear                         | Yes                             | Yes                                 | No                           | Yes                            | Moderate              |
| Alessi                              | 2020-05-24              | Yes                               | No                                  | Yes                          | Yes                                  | No                              | No                              | Yes                                 | No                           | No                             | High                  |
| Calcagno                            | 2020-05-20              | Yes                               | No                                  | Yes                          | Yes                                  | Unclear                         | Yes                             | Yes                                 | No                           | Yes                            | Moderate              |
| Carlo                               | 2020-05-18              | Yes                               | No                                  | Yes                          | No                                   | Unclear                         | Yes                             | Yes                                 | No                           | Unclear                        | Moderate              |
| Martella                            | 2020-05-17              | No                                | No                                  | Yes                          | No                                   | Unclear                         | Unclear                         | Unclear                             | No                           | Unclear                        | Unclear               |
| Cavaliere                           | 2020-05-16              | Yes                               | No                                  | No                           | No                                   | Unclear                         | Unclear                         | Yes                                 | No                           | Yes                            | High                  |
| Sandri                              | 2020-05-16              | Yes                               | No                                  | Yes                          | Yes                                  | Yes                             | Yes                             | Yes                                 | No                           | Yes                            | Moderate              |
| Bianchi                             | 2020-05-15              | No                                | Unclear                             | No                           | No                                   | Unclear                         | Unclear                         | No                                  | No                           | Unclear                        | Unclear               |
| Bianchi                             | 2020-05-15              | No                                | Unclear                             | No                           | No                                   | Unclear                         | Unclear                         | No                                  | No                           | Unclear                        | Unclear               |
| Stefanelli                          | 2020-05-15              | Yes                               | Yes                                 | Yes                          | Yes                                  | Yes                             | Yes                             | Yes                                 | No                           | Yes                            | Low                   |
| Marra                               | 2020-05-11              | No                                | No                                  | No                           | Yes                                  | Unclear                         | Unclear                         | Yes                                 | No                           | Unclear                        | High                  |
| Guerriero                           | 2020-05-08              | Yes                               | Yes                                 | Yes                          | Yes                                  | Unclear                         | Unclear                         | Yes                                 | No                           | Yes                            | Moderate              |
| Baracco                             | 2020-05-05              | No                                | No                                  | Yes                          | Yes                                  | Yes                             | Unclear                         | Yes                                 | No                           | Yes                            | High                  |
| Baracco                             | 2020-05-05              | Yes                               | Yes                                 | Yes                          | Yes                                  | Yes                             | Unclear                         | Yes                                 | No                           | Unclear                        | Moderate              |



| Article Author (Study Organization) | Sampling End Date (YMD) | Item 1: Appropriate sample frame* | Item 2: Probability sampling method | Item 3: Adequate sample size | Item 4: Subjects & setting described | Item 5: Good coverage of sample | Item 6: Sens > 90% & spec > 95% | Item 7: Same tests for all subjects | Item 8: Appropriate analysis | Item 9: Adequate response rate | Overall Risk of Bias† |
|-------------------------------------|-------------------------|-----------------------------------|-------------------------------------|------------------------------|--------------------------------------|---------------------------------|---------------------------------|-------------------------------------|------------------------------|--------------------------------|-----------------------|
| Denina                              | 2020-04-30              | Yes                               | No                                  | No                           | Yes                                  | Unclear                         | Unclear                         | No                                  | No                           | Unclear                        | High                  |
| Zambelli                            | 2020-04-30              | Yes                               | No                                  | No                           | Yes                                  | Unclear                         | Unclear                         | Yes                                 | No                           | Unclear                        | High                  |
| Vena                                | 2020-04-30              | No                                | No                                  | Yes                          | Yes                                  | Yes                             | Yes                             | No                                  | No                           | Unclear                        | High                  |
| Carozzi                             | 2020-04-30              | Yes                               | No                                  | Yes                          | No                                   | Unclear                         | No                              | No                                  | No                           | Unclear                        | High                  |
| Bontadi                             | 2020-04-29              | No                                | No                                  | Yes                          | Yes                                  | Unclear                         | Unclear                         | No                                  | No                           | No                             | High                  |
| Landro                              | 2020-04-28              | Yes                               | Unclear                             | Yes                          | No                                   | Unclear                         | Unclear                         | Unclear                             | No                           | Unclear                        | Unclear               |
| Volta                               | 2020-04-27              | No                                | No                                  | No                           | Yes                                  | Yes                             | Unclear                         | Yes                                 | No                           | Yes                            | High                  |
| Lahner                              | 2020-04-27              | No                                | Yes                                 | Yes                          | No                                   | Yes                             | No                              | Yes                                 | No                           | Unclear                        | High                  |
| Landro                              | 2020-04-24              | Yes                               | Unclear                             | Yes                          | No                                   | Unclear                         | Unclear                         | Unclear                             | No                           | Unclear                        | Unclear               |
| Loconsole                           | 2020-04-21              | Yes                               | No                                  | Yes                          | Yes                                  | Unclear                         | No                              | Yes                                 | No                           | Unclear                        | High                  |
| Cito                                | 2020-04-19              | Yes                               | Yes                                 | Yes                          | Yes                                  | Yes                             | Yes                             | Yes                                 | No                           | Yes                            | Moderate              |
| Paradiso                            | 2020-04-17              | No                                | No                                  | Yes                          | Yes                                  | Unclear                         | Yes                             | Yes                                 | No                           | Yes                            | High                  |
| Sotgiu                              | 2020-04-16              | Yes                               | No                                  | No                           | Yes                                  | Yes                             | No                              | Yes                                 | No                           | Unclear                        | High                  |
| Amendola                            | 2020-04-15              | No                                | No                                  | Yes                          | No                                   | Unclear                         | Unclear                         | Yes                                 | No                           | Yes                            | High                  |
| Canetti                             | 2020-04-15              | No                                | No                                  | No                           | Yes                                  | Unclear                         | Unclear                         | Yes                                 | No                           | Unclear                        | High                  |
| Valenti                             | 2020-04-08              | No                                | No                                  | Yes                          | Yes                                  | Unclear                         | Yes                             | Yes                                 | No                           | Unclear                        | High                  |
| Percivalle                          | 2020-04-06              | No                                | Unclear                             | No                           | No                                   | Yes                             | Yes                             | Yes                                 | No                           | Unclear                        | High                  |
| Fusco                               | 2020-04-02              | No                                | No                                  | No                           | Yes                                  | Yes                             | Unclear                         | Yes                                 | No                           | Unclear                        | High                  |
| Milani                              | 2020-03-31              | Yes                               | No                                  | No                           | No                                   | No                              | Unclear                         | Yes                                 | No                           | Yes                            | High                  |
| Pancrazzi                           | 2020-03-21              | Yes                               | No                                  | No                           | No                                   | No                              | No                              | Yes                                 | No                           | Unclear                        | High                  |
| Apolone                             | 2020-03-10              | No                                | No                                  | Yes                          | Yes                                  | Yes                             | Unclear                         | Yes                                 | No                           | Unclear                        | High                  |

| Article Author<br>(Study Organization) | Sampling End<br>Date<br>(YMD) | Item 1:<br>Appropriate<br>sample frame* | Item 2:<br>Probability<br>sampling<br>method | Item 3:<br>Adequate<br>sample size | Item 4:<br>Subjects &<br>setting<br>described | Item 5: Good<br>coverage of<br>sample | Item 6: Sens ><br>90% & spec ><br>95% | Item 7: Same<br>tests for all<br>subjects | Item 8:<br>Appropriate<br>analysis | Item 9:<br>Adequate<br>response rate | Overall Risk of<br>Bias† |
|----------------------------------------|-------------------------------|-----------------------------------------|----------------------------------------------|------------------------------------|-----------------------------------------------|---------------------------------------|---------------------------------------|-------------------------------------------|------------------------------------|--------------------------------------|--------------------------|
| <b>Japan</b>                           |                               |                                         |                                              |                                    |                                               |                                       |                                       |                                           |                                    |                                      |                          |
| Oka                                    | 2020-10-30                    | No                                      | No                                           | No                                 | No                                            | No                                    | Yes                                   | Yes                                       | No                                 | Unclear                              | High                     |
| Matthews                               | 2020-08-31                    | No                                      | No                                           | Yes                                | No                                            | Unclear                               | Yes                                   | Yes                                       | No                                 | No                                   | High                     |
| Hibino                                 | 2020-08-25                    | Yes                                     | No                                           | No                                 | Yes                                           | Yes                                   | Unclear                               | Yes                                       | No                                 | No                                   | High                     |
| Fukuda                                 | 2020-08-21                    | Yes                                     | No                                           | Yes                                | Yes                                           | Yes                                   | Unclear                               | Yes                                       | No                                 | Yes                                  | Moderate                 |
| Hibino                                 | 2020-07-30                    | Yes                                     | No                                           | Yes                                | Yes                                           | Unclear                               | Unclear                               | Yes                                       | No                                 | Unclear                              | Unclear                  |
| Nawa                                   | 2020-07-05                    | Yes                                     | Yes                                          | Yes                                | Yes                                           | Yes                                   | Yes                                   | Yes                                       | No                                 | No                                   | Moderate                 |
| Okuda                                  | 2020-06-28                    | No                                      | Yes                                          | Yes                                | No                                            | Unclear                               | Unclear                               | Unclear                                   | No                                 | Unclear                              | Unclear                  |
| Nishida                                | 2020-06-19                    | Yes                                     | No                                           | Yes                                | Yes                                           | No                                    | Yes                                   | Yes                                       | No                                 | Yes                                  | Moderate                 |
| Chong                                  | 2020-06-15                    | Yes                                     | No                                           | No                                 | No                                            | Yes                                   | Unclear                               | Yes                                       | No                                 | No                                   | High                     |
| Suda                                   | 2020-05-31                    | No                                      | No                                           | No                                 | Yes                                           | Yes                                   | Yes                                   | Yes                                       | No                                 | Yes                                  | High                     |
| Nakamura                               | 2020-05-29                    | Yes                                     | Unclear                                      | Yes                                | Yes                                           | Unclear                               | Yes                                   | Yes                                       | No                                 | Unclear                              | High                     |
| Kobashi                                | 2020-05-28                    | No                                      | Unclear                                      | Yes                                | Yes                                           | Yes                                   | Unclear                               | Yes                                       | No                                 | Unclear                              | High                     |
| Takita                                 | 2020-05-20                    | No                                      | No                                           | Yes                                | Yes                                           | Unclear                               | No                                    | Yes                                       | No                                 | Unclear                              | High                     |
| Denyer                                 | 2020-05-18                    | Yes                                     | No                                           | Yes                                | No                                            | Unclear                               | Unclear                               | Unclear                                   | Unclear                            | Unclear                              | Unclear                  |
| Fujita                                 | 2020-04-20                    | No                                      | No                                           | No                                 | Yes                                           | Yes                                   | Unclear                               | Unclear                                   | No                                 | Unclear                              | High                     |
| Doi                                    | 2020-04-07                    | No                                      | Yes                                          | Yes                                | No                                            | Unclear                               | Yes                                   | Yes                                       | No                                 | Unclear                              | High                     |
| Suzuki                                 | 2020-04-03                    | No                                      | No                                           | No                                 | Yes                                           | Unclear                               | Unclear                               | Yes                                       | No                                 | Unclear                              | High                     |
| Suda                                   | 2020-03-31                    | No                                      | No                                           | No                                 | Yes                                           | Yes                                   | Yes                                   | Yes                                       | No                                 | Yes                                  | High                     |
| <b>Liechtenstein</b>                   |                               |                                         |                                              |                                    |                                               |                                       |                                       |                                           |                                    |                                      |                          |
| Schaffner                              | 2020-10-06                    | Unclear                                 | Unclear                                      | Yes                                | Yes                                           | Unclear                               | Yes                                   | Yes                                       | No                                 | Unclear                              | Unclear                  |

| Article Author<br>(Study Organization) | Sampling End<br>Date<br>(YMD) | Item 1:<br>Appropriate<br>sample frame* | Item 2:<br>Probability<br>sampling<br>method | Item 3:<br>Adequate<br>sample size | Item 4:<br>Subjects &<br>setting<br>described | Item 5: Good<br>coverage of<br>sample | Item 6: Sens ><br>90% & spec ><br>95% | Item 7: Same<br>tests for all<br>subjects | Item 8:<br>Appropriate<br>analysis | Item 9:<br>Adequate<br>response rate | Overall Risk of<br>Bias† |
|----------------------------------------|-------------------------------|-----------------------------------------|----------------------------------------------|------------------------------------|-----------------------------------------------|---------------------------------------|---------------------------------------|-------------------------------------------|------------------------------------|--------------------------------------|--------------------------|
| <b>Luxembourg</b>                      |                               |                                         |                                              |                                    |                                               |                                       |                                       |                                           |                                    |                                      |                          |
| Snoeck                                 | 2020-05-05                    | Yes                                     | Yes                                          | Yes                                | Yes                                           | Yes                                   | No                                    | Yes                                       | No                                 | Unclear                              | Moderate                 |
| <b>Monaco</b>                          |                               |                                         |                                              |                                    |                                               |                                       |                                       |                                           |                                    |                                      |                          |
| Binacchi                               | 2020-06-16                    | Unclear                                 | No                                           | Yes                                | No                                            | Unclear                               | Unclear                               | Unclear                                   | No                                 | No                                   | Unclear                  |
| <b>Netherlands</b>                     |                               |                                         |                                              |                                    |                                               |                                       |                                       |                                           |                                    |                                      |                          |
| Vos                                    | 2020-05-11                    | Yes                                     | Yes                                          | No                                 | Yes                                           | Unclear                               | No                                    | Yes                                       | Yes                                | Unclear                              | Low                      |
| Vos                                    | 2020-05-11                    | Yes                                     | Yes                                          | Yes                                | Yes                                           | Unclear                               | No                                    | Yes                                       | Yes                                | Unclear                              | Low                      |
| Slot                                   | 2020-04-15                    | No                                      | Yes                                          | Yes                                | No                                            | Yes                                   | Yes                                   | Yes                                       | No                                 | Yes                                  | Moderate                 |
| Westerhuis                             | 2020-04-07                    | No                                      | No                                           | Yes                                | No                                            | Unclear                               | Unclear                               | Yes                                       | No                                 | Unclear                              | High                     |
| Westerhuis                             | 2020-03-06                    | No                                      | No                                           | Yes                                | No                                            | Unclear                               | Unclear                               | Yes                                       | No                                 | Unclear                              | High                     |
| <b>New Zealand</b>                     |                               |                                         |                                              |                                    |                                               |                                       |                                       |                                           |                                    |                                      |                          |
| Craigie                                | 2020-08-04                    | Yes                                     | No                                           | Yes                                | Yes                                           | Yes                                   | No                                    | No                                        | No                                 | Unclear                              | High                     |
| <b>Norway</b>                          |                               |                                         |                                              |                                    |                                               |                                       |                                       |                                           |                                    |                                      |                          |
| Tunheim                                | 2020-05-17                    | No                                      | No                                           | Yes                                | Yes                                           | Yes                                   | No                                    | Yes                                       | Yes                                | Unclear                              | Moderate                 |
| Trieu                                  | 2020-04-09                    | Yes                                     | No                                           | Yes                                | Yes                                           | Yes                                   | Unclear                               | Yes                                       | No                                 | Unclear                              | High                     |
| Kuwelker                               | 2020-04-04                    | No                                      | No                                           | No                                 | Yes                                           | Unclear                               | Unclear                               | Yes                                       | No                                 | No                                   | High                     |
| Cox                                    | 2020-04-04                    | Yes                                     | No                                           | No                                 | No                                            | Unclear                               | Unclear                               | Yes                                       | No                                 | Unclear                              | High                     |
| <b>Portugal</b>                        |                               |                                         |                                              |                                    |                                               |                                       |                                       |                                           |                                    |                                      |                          |
| Figueiredo-Campos                      | 2020-07-10                    | No                                      | No                                           | Yes                                | No                                            | Unclear                               | Yes                                   | Yes                                       | No                                 | Unclear                              | High                     |
| Figueiredo-Campos                      | 2020-07-10                    | Yes                                     | No                                           | Yes                                | No                                            | Unclear                               | Yes                                   | Yes                                       | No                                 | Unclear                              | Moderate                 |
| Kislaya                                | 2020-07-08                    | No                                      | No                                           | Yes                                | Yes                                           | Yes                                   | Yes                                   | Yes                                       | Yes                                | Unclear                              | Moderate                 |

| Article Author<br>(Study Organization) | Sampling End<br>Date<br>(YMD) | Item 1:<br>Appropriate<br>sample frame* | Item 2:<br>Probability<br>sampling<br>method | Item 3:<br>Adequate<br>sample size | Item 4:<br>Subjects &<br>setting<br>described | Item 5: Good<br>coverage of<br>sample | Item 6: Sens ><br>90% & spec ><br>95% | Item 7: Same<br>tests for all<br>subjects | Item 8:<br>Appropriate<br>analysis | Item 9:<br>Adequate<br>response rate | Overall Risk of<br>Bias† |
|----------------------------------------|-------------------------------|-----------------------------------------|----------------------------------------------|------------------------------------|-----------------------------------------------|---------------------------------------|---------------------------------------|-------------------------------------------|------------------------------------|--------------------------------------|--------------------------|
| Gonclaves                              | 2020-06-30                    | Yes                                     | No                                           | Yes                                | Yes                                           | Unclear                               | Yes                                   | Yes                                       | No                                 | Unclear                              | Moderate                 |
| <b>Republic of Korea</b>               |                               |                                         |                                              |                                    |                                               |                                       |                                       |                                           |                                    |                                      |                          |
| KBS World                              | 2020-10-15                    | Unclear                                 | Unclear                                      | Yes                                | No                                            | Unclear                               | Unclear                               | Unclear                                   | Unclear                            | Unclear                              | Unclear                  |
| KBS World                              | 2020-10-15                    | Unclear                                 | Unclear                                      | Yes                                | No                                            | Unclear                               | Unclear                               | Unclear                                   | Unclear                            | Unclear                              | Unclear                  |
| Ji-Ho                                  | 2020-07-09                    | No                                      | Unclear                                      | Yes                                | No                                            | Unclear                               | Unclear                               | Unclear                                   | No                                 | Unclear                              | Unclear                  |
| Song                                   | 2020-06-05                    | No                                      | No                                           | No                                 | Yes                                           | Unclear                               | No                                    | Yes                                       | No                                 | Unclear                              | High                     |
| Noh                                    | 2020-05-29                    | No                                      | No                                           | Yes                                | Yes                                           | Unclear                               | Yes                                   | Yes                                       | No                                 | Unclear                              | Moderate                 |
| Ko                                     | 2020-05-09                    | Yes                                     | No                                           | No                                 | Yes                                           | Unclear                               | No                                    | Yes                                       | No                                 | Unclear                              | High                     |
| Ko                                     | 2020-05-09                    | Yes                                     | No                                           | No                                 | Yes                                           | Unclear                               | No                                    | Yes                                       | No                                 | Unclear                              | High                     |
| <b>Singapore</b>                       |                               |                                         |                                              |                                    |                                               |                                       |                                       |                                           |                                    |                                      |                          |
| Kurohi                                 | 2020-04-15                    | Yes                                     | Unclear                                      | Yes                                | No                                            | Unclear                               | Unclear                               | Unclear                                   | No                                 | Unclear                              | Unclear                  |
| Kurohi                                 | 2020-04-15                    | Yes                                     | Unclear                                      | Yes                                | No                                            | Unclear                               | Unclear                               | Unclear                                   | No                                 | Unclear                              | Unclear                  |
| Ng                                     | 2020-04-03                    | Yes                                     | Yes                                          | Yes                                | Yes                                           | Unclear                               | Yes                                   | Yes                                       | No                                 | No                                   | Moderate                 |
| <b>Spain</b>                           |                               |                                         |                                              |                                    |                                               |                                       |                                       |                                           |                                    |                                      |                          |
| SavirÃ³n-Cornudella                    | 2020-08-31                    | Yes                                     | No                                           | No                                 | No                                            | Unclear                               | No                                    | Yes                                       | No                                 | Unclear                              | High                     |
| Garde-Noguera                          | 2020-06-30                    | Yes                                     | No                                           | No                                 | Yes                                           | Unclear                               | Unclear                               | Yes                                       | No                                 | Unclear                              | High                     |
| Prados                                 | 2020-06-26                    | Yes                                     | Unclear                                      | Yes                                | No                                            | Unclear                               | Unclear                               | Yes                                       | No                                 | Unclear                              | Unclear                  |
| Cabezon-Gutierrez                      | 2020-06-19                    | No                                      | No                                           | No                                 | Yes                                           | No                                    | Yes                                   | Yes                                       | No                                 | Unclear                              | High                     |
| Camba                                  | 2020-06-15                    | Yes                                     | No                                           | No                                 | Yes                                           | Unclear                               | Yes                                   | Yes                                       | No                                 | Unclear                              | High                     |
| Brotos                                 | 2020-06-03                    | Yes                                     | No                                           | Yes                                | Yes                                           | Unclear                               | Unclear                               | Yes                                       | No                                 | Unclear                              | Moderate                 |
| Flores                                 | 2020-06-03                    | Yes                                     | Yes                                          | Yes                                | No                                            | Yes                                   | Unclear                               | Unclear                                   | No                                 | Yes                                  | Moderate                 |

| Article Author<br>(Study Organization) | Sampling End<br>Date<br>(YMD) | Item 1:<br>Appropriate<br>sample frame* | Item 2:<br>Probability<br>sampling<br>method | Item 3:<br>Adequate<br>sample size | Item 4:<br>Subjects &<br>setting<br>described | Item 5: Good<br>coverage of<br>sample | Item 6: Sens ><br>90% & spec ><br>95% | Item 7: Same<br>tests for all<br>subjects | Item 8:<br>Appropriate<br>analysis | Item 9:<br>Adequate<br>response rate | Overall Risk of<br>Bias† |
|----------------------------------------|-------------------------------|-----------------------------------------|----------------------------------------------|------------------------------------|-----------------------------------------------|---------------------------------------|---------------------------------------|-------------------------------------------|------------------------------------|--------------------------------------|--------------------------|
| Perez-Garcia                           | 2020-05-30                    | No                                      | No                                           | Yes                                | Yes                                           | Unclear                               | No                                    | Yes                                       | No                                 | Unclear                              | High                     |
| Fabre                                  | 2020-05-29                    | No                                      | Unclear                                      | No                                 | No                                            | No                                    | Unclear                               | Yes                                       | No                                 | Unclear                              | High                     |
| Barallat                               | 2020-05-22                    | Yes                                     | No                                           | Yes                                | Yes                                           | Yes                                   | Unclear                               | Yes                                       | No                                 | Yes                                  | High                     |
| Vinuela                                | 2020-05-21                    | Yes                                     | No                                           | No                                 | Yes                                           | Yes                                   | Unclear                               | Yes                                       | No                                 | Yes                                  | High                     |
| Soriano                                | 2020-05-16                    | No                                      | Yes                                          | Yes                                | Yes                                           | No                                    | Unclear                               | Yes                                       | No                                 | Yes                                  | High                     |
| Pollan                                 | 2020-05-11                    | Yes                                     | Yes                                          | Yes                                | Yes                                           | Yes                                   | Yes                                   | Yes                                       | Yes                                | Yes                                  | Low                      |
| Villalain                              | 2020-05-10                    | Yes                                     | Yes                                          | Yes                                | Yes                                           | Yes                                   | Unclear                               | Yes                                       | No                                 | Unclear                              | Moderate                 |
| Gras-Valenti                           | 2020-05-08                    | No                                      | No                                           | Yes                                | No                                            | No                                    | Unclear                               | Unclear                                   | No                                 | Yes                                  | Unclear                  |
| Crovetto                               | 2020-05-05                    | No                                      | No                                           | Yes                                | No                                            | No                                    | Unclear                               | No                                        | No                                 | Unclear                              | High                     |
| Valdivia                               | 2020-04-30                    | No                                      | Unclear                                      | Yes                                | No                                            | Unclear                               | No                                    | Yes                                       | No                                 | Unclear                              | High                     |
| Galan                                  | 2020-04-27                    | No                                      | No                                           | Yes                                | Yes                                           | Unclear                               | Unclear                               | Yes                                       | No                                 | Yes                                  | High                     |
| Olalla                                 | 2020-04-25                    | Yes                                     | No                                           | No                                 | Yes                                           | Yes                                   | Unclear                               | Yes                                       | No                                 | Unclear                              | High                     |
| Montenegro                             | 2020-04-24                    | Yes                                     | Yes                                          | No                                 | Yes                                           | Yes                                   | Unclear                               | Unclear                                   | No                                 | No                                   | High                     |
| Borraz                                 | 2020-04-21                    | No                                      | No                                           | No                                 | Yes                                           | Unclear                               | Yes                                   | Yes                                       | No                                 | Unclear                              | High                     |
| Borraz                                 | 2020-04-21                    | No                                      | No                                           | No                                 | Yes                                           | Unclear                               | Yes                                   | Yes                                       | No                                 | Unclear                              | High                     |
| Dacosta-Urbieta                        | 2020-04-16                    | Yes                                     | No                                           | No                                 | No                                            | Unclear                               | Yes                                   | Yes                                       | No                                 | Unclear                              | High                     |
| Martin                                 | 2020-04-15                    | Yes                                     | No                                           | Yes                                | Yes                                           | Unclear                               | No                                    | Yes                                       | No                                 | Yes                                  | High                     |
| Fernandez                              | 2020-04-14                    | No                                      | No                                           | Yes                                | Yes                                           | Unclear                               | Unclear                               | Yes                                       | No                                 | Yes                                  | High                     |
| <b>Sweden</b>                          |                               |                                         |                                              |                                    |                                               |                                       |                                       |                                           |                                    |                                      |                          |
| Dopico                                 | 2020-12-11                    | No                                      | Yes                                          | Yes                                | No                                            | Unclear                               | Unclear                               | Yes                                       | No                                 | Unclear                              | High                     |
| Rashid-Abdi                            | 2020-08-19                    | Yes                                     | No                                           | No                                 | Yes                                           | Yes                                   | Yes                                   | Yes                                       | No                                 | Unclear                              | High                     |

| Article Author (Study Organization) | Sampling End Date (YMD) | Item 1: Appropriate sample frame* | Item 2: Probability sampling method | Item 3: Adequate sample size | Item 4: Subjects & setting described | Item 5: Good coverage of sample | Item 6: Sens > 90% & spec > 95% | Item 7: Same tests for all subjects | Item 8: Appropriate analysis | Item 9: Adequate response rate | Overall Risk of Bias <sup>†</sup> |
|-------------------------------------|-------------------------|-----------------------------------|-------------------------------------|------------------------------|--------------------------------------|---------------------------------|---------------------------------|-------------------------------------|------------------------------|--------------------------------|-----------------------------------|
| Laursen                             | 2020-08-10              | No                                | No                                  | Yes                          | Yes                                  | Yes                             | Unclear                         | Yes                                 | No                           | Unclear                        | High                              |
| The Local                           | 2020-07-22              | Yes                               | No                                  | Yes                          | No                                   | Unclear                         | Unclear                         | Unclear                             | No                           | Unclear                        | High                              |
| Region                              | 2020-07-15              | Yes                               | No                                  | Yes                          | No                                   | Unclear                         | Unclear                         | Unclear                             | No                           | Unclear                        | High                              |
| Lidstrom                            | 2020-06-25              | Yes                               | Yes                                 | Yes                          | Yes                                  | Yes                             | Unclear                         | Yes                                 | No                           | Yes                            | Moderate                          |
| Lundkvist                           | 2020-06-18              | Yes                               | Yes                                 | No                           | Yes                                  | Unclear                         | Yes                             | Yes                                 | No                           | Unclear                        | High                              |
| Lundkvist                           | 2020-06-18              | Yes                               | Yes                                 | No                           | Yes                                  | Unclear                         | Yes                             | Yes                                 | No                           | Unclear                        | High                              |
| Hassan                              | 2020-06-17              | No                                | No                                  | No                           | Yes                                  | No                              | Yes                             | Yes                                 | No                           | Yes                            | High                              |
| Swedish Public Health Agency        | 2020-06-14              | No                                | No                                  | Yes                          | No                                   | Unclear                         | Yes                             | Yes                                 | No                           | Unclear                        | High                              |
| Swedish Public Health Agency        | 2020-06-07              | No                                | No                                  | Yes                          | No                                   | Unclear                         | Yes                             | Yes                                 | No                           | Unclear                        | High                              |
| Swedish Public Health Agency        | 2020-05-31              | No                                | No                                  | Yes                          | No                                   | Unclear                         | Yes                             | Yes                                 | No                           | Unclear                        | High                              |
| Swedish Public Health Agency        | 2020-05-24              | No                                | No                                  | Yes                          | No                                   | Unclear                         | Yes                             | Yes                                 | No                           | Unclear                        | High                              |
| Roxhed                              | 2020-05-21              | Yes                               | Yes                                 | Yes                          | Yes                                  | Unclear                         | Yes                             | Yes                                 | No                           | No                             | Moderate                          |
| Swedish Public Health Agency        | 2020-05-17              | No                                | No                                  | Yes                          | No                                   | Unclear                         | Yes                             | Yes                                 | No                           | Unclear                        | High                              |
| Swedish Public Health Agency        | 2020-05-10              | No                                | No                                  | Yes                          | No                                   | Unclear                         | Yes                             | Yes                                 | No                           | Unclear                        | High                              |
| Rudberg                             | 2020-05-08              | Yes                               | No                                  | Yes                          | Yes                                  | Yes                             | Yes                             | Yes                                 | No                           | No                             | Moderate                          |
| Swedish Public Health Agency        | 2020-05-03              | No                                | No                                  | Yes                          | No                                   | Unclear                         | Yes                             | Yes                                 | No                           | Unclear                        | High                              |
| Swedish Public Health Agency        | 2020-04-26              | No                                | No                                  | Yes                          | No                                   | Unclear                         | Yes                             | Yes                                 | No                           | Unclear                        | High                              |

| Article Author (Study Organization) | Sampling End Date (YMD) | Item 1: Appropriate sample frame* | Item 2: Probability sampling method | Item 3: Adequate sample size | Item 4: Subjects & setting described | Item 5: Good coverage of sample | Item 6: Sens > 90% & spec > 95% | Item 7: Same tests for all subjects | Item 8: Appropriate analysis | Item 9: Adequate response rate | Overall Risk of Bias† |
|-------------------------------------|-------------------------|-----------------------------------|-------------------------------------|------------------------------|--------------------------------------|---------------------------------|---------------------------------|-------------------------------------|------------------------------|--------------------------------|-----------------------|
| Lindahl                             | 2020-04-20              | Yes                               | No                                  | Yes                          | No                                   | Unclear                         | Yes                             | Yes                                 | No                           | Unclear                        | High                  |
| <b>Switzerland</b>                  |                         |                                   |                                     |                              |                                      |                                 |                                 |                                     |                              |                                |                       |
| Ulyte                               | 2020-11-19              | Yes                               | Yes                                 | Yes                          | Yes                                  | Yes                             | Yes                             | Yes                                 | Yes                          | No                             | Low                   |
| Anker                               | 2020-10-14              | Yes                               | Yes                                 | No                           | Yes                                  | Yes                             | Yes                             | Unclear                             | Yes                          | No                             | Moderate              |
| Kahlert                             | 2020-08-15              | No                                | No                                  | Yes                          | Yes                                  | Yes                             | Unclear                         | Yes                                 | No                           | No                             | Moderate              |
| Universita della Svizzera Italiana  | 2020-07-31              | Unclear                           | Yes                                 | Yes                          | No                                   | Unclear                         | Unclear                         | Unclear                             | No                           | Unclear                        | Unclear               |
| Emmenegger                          | 2020-07-15              | No                                | No                                  | Yes                          | Yes                                  | Unclear                         | Yes                             | Yes                                 | No                           | Unclear                        | Moderate              |
| Emmenegger                          | 2020-07-15              | No                                | No                                  | Yes                          | Yes                                  | Unclear                         | Yes                             | Yes                                 | No                           | Unclear                        | Moderate              |
| Ulyte                               | 2020-07-09              | Yes                               | Yes                                 | No                           | No                                   | Unclear                         | Yes                             | Yes                                 | Yes                          | Unclear                        | Moderate              |
| Bi                                  | 2020-06-30              | Yes                               | No                                  | Yes                          | Yes                                  | No                              | Yes                             | Yes                                 | No                           | No                             | Moderate              |
| Richard                             | 2020-06-30              | Yes                               | Yes                                 | Yes                          | Yes                                  | No                              | Yes                             | Yes                                 | Yes                          | No                             | Low                   |
| Fenwick                             | 2020-06-27              | Yes                               | Unclear                             | No                           | No                                   | Unclear                         | Yes                             | Yes                                 | No                           | Unclear                        | High                  |
| Fenwick                             | 2020-06-27              | Yes                               | Yes                                 | No                           | No                                   | Unclear                         | Yes                             | Yes                                 | No                           | Unclear                        | High                  |
| Dupraz                              | 2020-06-27              | Yes                               | Yes                                 | No                           | Yes                                  | Unclear                         | Yes                             | Yes                                 | Yes                          | Unclear                        | Moderate              |
| Dupraz                              | 2020-06-27              | Yes                               | Yes                                 | No                           | Yes                                  | Unclear                         | Yes                             | Yes                                 | Yes                          | Unclear                        | Moderate              |
| Posfay-Barbe                        | 2020-04-30              | No                                | No                                  | No                           | Yes                                  | Unclear                         | Unclear                         | Yes                                 | No                           | Unclear                        | High                  |
| Emmenegger                          | 2020-04-30              | No                                | No                                  | Yes                          | Yes                                  | Unclear                         | Yes                             | Yes                                 | No                           | Unclear                        | Moderate              |
| Emmenegger                          | 2020-04-30              | No                                | No                                  | Yes                          | Yes                                  | Unclear                         | Yes                             | Yes                                 | No                           | Unclear                        | Moderate              |
| Kohler                              | 2020-04-03              | Yes                               | No                                  | Yes                          | Yes                                  | Yes                             | Unclear                         | No                                  | No                           | Unclear                        | High                  |
| Emmenegger                          | 2020-03-31              | No                                | No                                  | Yes                          | Yes                                  | Unclear                         | Yes                             | Yes                                 | No                           | Unclear                        | Moderate              |

| Article Author<br>(Study Organization) | Sampling End<br>Date<br>(YMD) | Item 1:<br>Appropriate<br>sample frame* | Item 2:<br>Probability<br>sampling<br>method | Item 3:<br>Adequate<br>sample size | Item 4:<br>Subjects &<br>setting<br>described | Item 5: Good<br>coverage of<br>sample | Item 6: Sens ><br>90% & spec ><br>95% | Item 7: Same<br>tests for all<br>subjects | Item 8:<br>Appropriate<br>analysis | Item 9:<br>Adequate<br>response rate | Overall Risk of<br>Bias† |
|----------------------------------------|-------------------------------|-----------------------------------------|----------------------------------------------|------------------------------------|-----------------------------------------------|---------------------------------------|---------------------------------------|-------------------------------------------|------------------------------------|--------------------------------------|--------------------------|
| <b>The United Kingdom</b>              |                               |                                         |                                              |                                    |                                               |                                       |                                       |                                           |                                    |                                      |                          |
| Office for National<br>Statistics      | 2021-01-14                    | Yes                                     | Yes                                          | Yes                                | No                                            | Unclear                               | Yes                                   | Yes                                       | No                                 | Unclear                              | Moderate                 |
| Office for National<br>Statistics      | 2021-01-14                    | Yes                                     | Yes                                          | No                                 | No                                            | Unclear                               | Yes                                   | Yes                                       | No                                 | Unclear                              | High                     |
| Office for National<br>Statistics      | 2021-01-14                    | Yes                                     | Yes                                          | Yes                                | No                                            | Unclear                               | Yes                                   | Yes                                       | No                                 | Unclear                              | Moderate                 |
| Office for National<br>Statistics      | 2021-01-14                    | Yes                                     | Yes                                          | Yes                                | No                                            | Unclear                               | Yes                                   | Yes                                       | No                                 | Unclear                              | Moderate                 |
| Office for National<br>Statistics      | 2020-12-17                    | Yes                                     | Yes                                          | Yes                                | No                                            | Unclear                               | Yes                                   | Yes                                       | No                                 | Unclear                              | Moderate                 |
| Office for National<br>Statistics      | 2020-12-17                    | Yes                                     | Yes                                          | No                                 | No                                            | Unclear                               | Yes                                   | Yes                                       | No                                 | Unclear                              | High                     |
| Office for National<br>Statistics      | 2020-12-17                    | Yes                                     | Yes                                          | Yes                                | No                                            | Unclear                               | Yes                                   | Yes                                       | No                                 | Unclear                              | Moderate                 |
| Office for National<br>Statistics      | 2020-12-17                    | Yes                                     | Yes                                          | Yes                                | No                                            | Unclear                               | Yes                                   | Yes                                       | No                                 | Unclear                              | Moderate                 |
| Taubel                                 | 2020-12-02                    | No                                      | No                                           | Yes                                | Yes                                           | Unclear                               | Unclear                               | Yes                                       | No                                 | Unclear                              | High                     |
| Lumley                                 | 2020-11-30                    | Yes                                     | No                                           | Yes                                | Yes                                           | Unclear                               | Yes                                   | Yes                                       | No                                 | Unclear                              | Moderate                 |
| Office for National<br>Statistics      | 2020-11-19                    | Yes                                     | Yes                                          | No                                 | No                                            | Unclear                               | Yes                                   | Yes                                       | No                                 | Unclear                              | High                     |
| Office for National<br>Statistics      | 2020-11-19                    | Yes                                     | Yes                                          | No                                 | No                                            | Unclear                               | Yes                                   | Yes                                       | No                                 | Unclear                              | High                     |
| Office for National<br>Statistics      | 2020-11-19                    | Yes                                     | Yes                                          | No                                 | No                                            | Unclear                               | Yes                                   | Yes                                       | No                                 | Unclear                              | High                     |
| Office for National<br>Statistics      | 2020-11-19                    | Yes                                     | Yes                                          | Yes                                | No                                            | Unclear                               | Yes                                   | Yes                                       | No                                 | Unclear                              | Moderate                 |



| Article Author<br>(Study Organization) | Sampling End<br>Date<br>(YMD) | Item 1:<br>Appropriate<br>sample frame* | Item 2:<br>Probability<br>sampling<br>method | Item 3:<br>Adequate<br>sample size | Item 4:<br>Subjects &<br>setting<br>described | Item 5: Good<br>coverage of<br>sample | Item 6: Sens ><br>90% & spec ><br>95% | Item 7: Same<br>tests for all<br>subjects | Item 8:<br>Appropriate<br>analysis | Item 9:<br>Adequate<br>response rate | Overall Risk of<br>Bias† |
|----------------------------------------|-------------------------------|-----------------------------------------|----------------------------------------------|------------------------------------|-----------------------------------------------|---------------------------------------|---------------------------------------|-------------------------------------------|------------------------------------|--------------------------------------|--------------------------|
| Office for National<br>Statistics      | 2020-10-22                    | Yes                                     | Yes                                          | Yes                                | No                                            | Unclear                               | Yes                                   | Yes                                       | No                                 | Unclear                              | Moderate                 |
| Office for National<br>Statistics      | 2020-10-22                    | Yes                                     | Yes                                          | No                                 | No                                            | Unclear                               | Yes                                   | Yes                                       | No                                 | Unclear                              | High                     |
| Office for National<br>Statistics      | 2020-10-22                    | Yes                                     | Yes                                          | No                                 | No                                            | Unclear                               | Yes                                   | Yes                                       | No                                 | Unclear                              | High                     |
| Office for National<br>Statistics      | 2020-10-22                    | Yes                                     | Yes                                          | No                                 | No                                            | Unclear                               | Yes                                   | Yes                                       | No                                 | Unclear                              | High                     |
| Ward                                   | 2020-09-28                    | Yes                                     | Yes                                          | Yes                                | Yes                                           | Unclear                               | No                                    | Yes                                       | Yes                                | No                                   | Moderate                 |
| Office for National<br>Statistics      | 2020-09-24                    | Yes                                     | Yes                                          | No                                 | No                                            | Unclear                               | Yes                                   | Yes                                       | No                                 | Unclear                              | High                     |
| Office for National<br>Statistics      | 2020-09-24                    | Yes                                     | Yes                                          | Yes                                | No                                            | Unclear                               | Yes                                   | Yes                                       | No                                 | Unclear                              | Moderate                 |
| Public Health<br>England               | 2020-09-18                    | No                                      | Yes                                          | Yes                                | No                                            | Unclear                               | No                                    | Yes                                       | Yes                                | Unclear                              | Moderate                 |
| Abo-Leyah                              | 2020-09-02                    | No                                      | Yes                                          | No                                 | No                                            | Yes                                   | Unclear                               | Yes                                       | No                                 | Unclear                              | High                     |
| Abo-Leyah                              | 2020-09-02                    | Yes                                     | No                                           | Yes                                | Yes                                           | Yes                                   | Unclear                               | Yes                                       | No                                 | Unclear                              | High                     |
| Public Health<br>England               | 2020-08-30                    | No                                      | Yes                                          | Yes                                | No                                            | Unclear                               | No                                    | Yes                                       | Yes                                | Unclear                              | Moderate                 |
| Office for National<br>Statistics      | 2020-08-27                    | Yes                                     | Yes                                          | Yes                                | No                                            | Unclear                               | Yes                                   | Yes                                       | No                                 | Unclear                              | Moderate                 |
| Harris                                 | 2020-08-20                    | Yes                                     | No                                           | Yes                                | Yes                                           | Unclear                               | Unclear                               | No                                        | No                                 | Unclear                              | Moderate                 |
| Public Health<br>England               | 2020-08-16                    | No                                      | Yes                                          | Yes                                | No                                            | Yes                                   | Yes                                   | Yes                                       | No                                 | Unclear                              | Moderate                 |
| Public Health<br>England               | 2020-08-16                    | No                                      | Yes                                          | Yes                                | No                                            | Yes                                   | Yes                                   | Yes                                       | Yes                                | Unclear                              | Low                      |
| Roarty                                 | 2020-08-15                    | Yes                                     | No                                           | Yes                                | No                                            | Unclear                               | No                                    | Yes                                       | No                                 | Unclear                              | Moderate                 |

| Article Author (Study Organization) | Sampling End Date (YMD) | Item 1: Appropriate sample frame* | Item 2: Probability sampling method | Item 3: Adequate sample size | Item 4: Subjects & setting described | Item 5: Good coverage of sample | Item 6: Sens > 90% & spec > 95% | Item 7: Same tests for all subjects | Item 8: Appropriate analysis | Item 9: Adequate response rate | Overall Risk of Bias† |
|-------------------------------------|-------------------------|-----------------------------------|-------------------------------------|------------------------------|--------------------------------------|---------------------------------|---------------------------------|-------------------------------------|------------------------------|--------------------------------|-----------------------|
| Ward                                | 2020-08-13              | Yes                               | Yes                                 | Yes                          | Yes                                  | Unclear                         | No                              | Yes                                 | Yes                          | No                             | Moderate              |
| Public Health Scotland              | 2020-08-09              | No                                | No                                  | Yes                          | Yes                                  | Yes                             | No                              | Yes                                 | Yes                          | Unclear                        | Moderate              |
| Public Health Scotland              | 2020-08-09              | No                                | No                                  | Yes                          | Yes                                  | Yes                             | No                              | Yes                                 | No                           | Unclear                        | Moderate              |
| Cooper                              | 2020-08-07              | Yes                               | No                                  | Yes                          | Yes                                  | Unclear                         | Yes                             | Yes                                 | No                           | Yes                            | Moderate              |
| Public Health England               | 2020-08-05              | Yes                               | Yes                                 | No                           | No                                   | Yes                             | Yes                             | Yes                                 | Yes                          | Yes                            | Moderate              |
| Black                               | 2020-08-03              | No                                | No                                  | No                           | Yes                                  | Unclear                         | Unclear                         | Yes                                 | No                           | Unclear                        | High                  |
| Office for National Statistics      | 2020-07-30              | Yes                               | Yes                                 | Yes                          | No                                   | Unclear                         | Yes                             | Yes                                 | No                           | Unclear                        | Moderate              |
| Public Health England               | 2020-07-28              | No                                | Yes                                 | Yes                          | No                                   | Unclear                         | No                              | Yes                                 | Yes                          | Unclear                        | Moderate              |
| Claudiani                           | 2020-07-27              | Yes                               | No                                  | No                           | Yes                                  | Yes                             | Unclear                         | Yes                                 | No                           | Unclear                        | High                  |
| Ward                                | 2020-07-13              | Yes                               | Yes                                 | Yes                          | Yes                                  | No                              | No                              | Yes                                 | Yes                          | Yes                            | Low                   |
| Martin                              | 2020-07-13              | Yes                               | No                                  | Yes                          | Yes                                  | Yes                             | Yes                             | Yes                                 | No                           | Yes                            | Moderate              |
| Hanrath                             | 2020-07-06              | Yes                               | No                                  | Yes                          | Yes                                  | Unclear                         | Unclear                         | Yes                                 | No                           | Yes                            | High                  |
| Predecki                            | 2020-07-03              | No                                | No                                  | Yes                          | Yes                                  | Unclear                         | Unclear                         | Yes                                 | No                           | Unclear                        | High                  |
| Waterfield                          | 2020-07-03              | Yes                               | No                                  | Yes                          | Yes                                  | Yes                             | No                              | Yes                                 | No                           | Unclear                        | High                  |
| Office for National Statistics      | 2020-07-02              | Yes                               | Yes                                 | Yes                          | No                                   | Unclear                         | Yes                             | Yes                                 | No                           | Unclear                        | Moderate              |
| Rowland                             | 2020-06-30              | No                                | No                                  | No                           | Yes                                  | No                              | Yes                             | Yes                                 | No                           | Unclear                        | High                  |
| Public Health England               | 2020-06-30              | No                                | Yes                                 | Yes                          | No                                   | Unclear                         | Yes                             | Yes                                 | Yes                          | Unclear                        | Moderate              |
| Graham                              | 2020-06-30              | No                                | No                                  | No                           | No                                   | Unclear                         | Yes                             | Yes                                 | No                           | Unclear                        | High                  |

| Article Author (Study Organization) | Sampling End Date (YMD) | Item 1: Appropriate sample frame* | Item 2: Probability sampling method | Item 3: Adequate sample size | Item 4: Subjects & setting described | Item 5: Good coverage of sample | Item 6: Sens > 90% & spec > 95% | Item 7: Same tests for all subjects | Item 8: Appropriate analysis | Item 9: Adequate response rate | Overall Risk of Bias† |
|-------------------------------------|-------------------------|-----------------------------------|-------------------------------------|------------------------------|--------------------------------------|---------------------------------|---------------------------------|-------------------------------------|------------------------------|--------------------------------|-----------------------|
| Davis                               | 2020-06-30              | No                                | No                                  | Yes                          | Yes                                  | No                              | Yes                             | Yes                                 | No                           | No                             | High                  |
| Public Health England               | 2020-06-28              | No                                | Yes                                 | Yes                          | No                                   | Unclear                         | No                              | Yes                                 | Yes                          | Unclear                        | Moderate              |
| Gulraj                              | 2020-06-17              | Yes                               | Unclear                             | Yes                          | No                                   | Unclear                         | Unclear                         | Unclear                             | No                           | Unclear                        | Unclear               |
| Lumley                              | 2020-06-15              | Yes                               | Yes                                 | Yes                          | Yes                                  | Unclear                         | Yes                             | Yes                                 | Unclear                      | Yes                            | Moderate              |
| Jones                               | 2020-06-15              | Yes                               | No                                  | Yes                          | Yes                                  | Unclear                         | Unclear                         | No                                  | No                           | No                             | High                  |
| Favara                              | 2020-06-15              | Yes                               | No                                  | No                           | Yes                                  | Unclear                         | No                              | Yes                                 | No                           | Unclear                        | High                  |
| Pallett                             | 2020-06-12              | Yes                               | No                                  | No                           | Yes                                  | No                              | No                              | Yes                                 | No                           | No                             | High                  |
| Baxendale                           | 2020-06-10              | No                                | No                                  | Yes                          | Yes                                  | Unclear                         | Yes                             | Yes                                 | No                           | Unclear                        | High                  |
| Arif                                | 2020-06-08              | No                                | No                                  | No                           | Yes                                  | Yes                             | Unclear                         | Unclear                             | No                           | Unclear                        | High                  |
| Razvi                               | 2020-06-08              | Yes                               | No                                  | Yes                          | Yes                                  | No                              | Unclear                         | Yes                                 | No                           | No                             | High                  |
| Favara                              | 2020-06-07              | Yes                               | Yes                                 | No                           | No                                   | Unclear                         | No                              | Yes                                 | No                           | Yes                            | High                  |
| Bampoe                              | 2020-06-05              | Yes                               | Unclear                             | No                           | Yes                                  | No                              | Yes                             | Yes                                 | No                           | Unclear                        | High                  |
| Grant                               | 2020-06-05              | Yes                               | No                                  | Yes                          | No                                   | Yes                             | Yes                             | Yes                                 | No                           | No                             | High                  |
| McCafferty                          | 2020-06-04              | Yes                               | No                                  | Yes                          | No                                   | No                              | Yes                             | Yes                                 | No                           | Unclear                        | High                  |
| Office for National Statistics      | 2020-06-04              | Yes                               | Yes                                 | Yes                          | No                                   | Unclear                         | Yes                             | Yes                                 | No                           | Unclear                        | Moderate              |
| Wells                               | 2020-06-02              | No                                | Unclear                             | No                           | Yes                                  | Unclear                         | Yes                             | Yes                                 | No                           | No                             | High                  |
| Ladhani                             | 2020-05-31              | Yes                               | No                                  | No                           | Yes                                  | Yes                             | Unclear                         | Yes                                 | No                           | Unclear                        | High                  |
| Public Health England               | 2020-05-31              | No                                | Yes                                 | Yes                          | No                                   | Unclear                         | No                              | Yes                                 | Yes                          | Unclear                        | Moderate              |
| Public Health England               | 2020-05-31              | Yes                               | Yes                                 | Yes                          | No                                   | Yes                             | Yes                             | Yes                                 | No                           | Unclear                        | Moderate              |

| Article Author (Study Organization) | Sampling End Date (YMD) | Item 1: Appropriate sample frame* | Item 2: Probability sampling method | Item 3: Adequate sample size | Item 4: Subjects & setting described | Item 5: Good coverage of sample | Item 6: Sens > 90% & spec > 95% | Item 7: Same tests for all subjects | Item 8: Appropriate analysis | Item 9: Adequate response rate | Overall Risk of Bias† |
|-------------------------------------|-------------------------|-----------------------------------|-------------------------------------|------------------------------|--------------------------------------|---------------------------------|---------------------------------|-------------------------------------|------------------------------|--------------------------------|-----------------------|
| Khalil                              | 2020-05-28              | No                                | No                                  | No                           | No                                   | Unclear                         | Yes                             | Yes                                 | No                           | Unclear                        | High                  |
| Hughes                              | 2020-05-24              | No                                | No                                  | Yes                          | Yes                                  | Unclear                         | Yes                             | Yes                                 | Yes                          | Unclear                        | Moderate              |
| Thompson                            | 2020-05-18              | No                                | Yes                                 | Yes                          | Yes                                  | No                              | Yes                             | Yes                                 | No                           | Unclear                        | Moderate              |
| Poulikakos                          | 2020-05-06              | Yes                               | No                                  | No                           | No                                   | No                              | Unclear                         | Yes                                 | No                           | Unclear                        | High                  |
| Public Health England               | 2020-04-30              | Yes                               | Yes                                 | Yes                          | No                                   | Yes                             | Yes                             | Yes                                 | Yes                          | Unclear                        | Moderate              |
| Public Health England               | 2020-04-30              | Yes                               | Yes                                 | No                           | No                                   | Yes                             | Yes                             | Yes                                 | Yes                          | Unclear                        | Moderate              |
| Public Health England               | 2020-04-26              | No                                | Yes                                 | Yes                          | No                                   | Unclear                         | No                              | Yes                                 | Yes                          | Unclear                        | Moderate              |
| Shields                             | 2020-04-25              | Yes                               | No                                  | No                           | Yes                                  | Yes                             | Yes                             | Yes                                 | No                           | Unclear                        | High                  |
| Public Health England               | 2020-04-24              | No                                | Yes                                 | Yes                          | No                                   | Unclear                         | No                              | Yes                                 | Yes                          | Unclear                        | Moderate              |
| Sikora                              | 2020-04-24              | Yes                               | No                                  | No                           | No                                   | Unclear                         | Unclear                         | Yes                                 | No                           | Unclear                        | High                  |
| Public Health England               | 2020-04-20              | No                                | Yes                                 | Yes                          | No                                   | Unclear                         | No                              | Yes                                 | Yes                          | Unclear                        | Moderate              |
| Public Health England               | 2020-04-16              | No                                | Yes                                 | Yes                          | No                                   | Unclear                         | No                              | Yes                                 | Yes                          | Unclear                        | Moderate              |
| Public Health England               | 2020-04-13              | No                                | Yes                                 | Yes                          | No                                   | Unclear                         | No                              | Yes                                 | Yes                          | Unclear                        | Moderate              |
| Ladhani                             | 2020-04-13              | Yes                               | No                                  | No                           | Yes                                  | Unclear                         | Unclear                         | Yes                                 | No                           | Yes                            | High                  |
| Houlihan                            | 2020-04-08              | Yes                               | No                                  | No                           | Yes                                  | Yes                             | Unclear                         | Yes                                 | No                           | Unclear                        | High                  |
| Public Health England               | 2020-04-03              | No                                | Yes                                 | Yes                          | No                                   | Unclear                         | No                              | Yes                                 | Yes                          | Unclear                        | Moderate              |
| Public Health England               | 2020-03-31              | Yes                               | Yes                                 | No                           | No                                   | Yes                             | Yes                             | Yes                                 | Yes                          | Unclear                        | Moderate              |

| Article Author (Study Organization) | Sampling End Date (YMD) | Item 1: Appropriate sample frame* | Item 2: Probability sampling method | Item 3: Adequate sample size | Item 4: Subjects & setting described | Item 5: Good coverage of sample | Item 6: Sens > 90% & spec > 95% | Item 7: Same tests for all subjects | Item 8: Appropriate analysis | Item 9: Adequate response rate | Overall Risk of Bias† |
|-------------------------------------|-------------------------|-----------------------------------|-------------------------------------|------------------------------|--------------------------------------|---------------------------------|---------------------------------|-------------------------------------|------------------------------|--------------------------------|-----------------------|
| Public Health England               | 2020-03-31              | Yes                               | Yes                                 | No                           | No                                   | Yes                             | Yes                             | Yes                                 | Yes                          | Unclear                        | Moderate              |
| Public Health England               | 2020-03-27              | No                                | Yes                                 | Yes                          | No                                   | Unclear                         | No                              | Yes                                 | Yes                          | Unclear                        | Moderate              |
| <b>United States of America</b>     |                         |                                   |                                     |                              |                                      |                                 |                                 |                                     |                              |                                |                       |
| Maleck                              | 2020-12-14              | Yes                               | Yes                                 | Yes                          | No                                   | Unclear                         | Unclear                         | Yes                                 | No                           | No                             | Moderate              |
| Craver                              | 2020-12-09              | Yes                               | Yes                                 | Yes                          | No                                   | No                              | Unclear                         | Unclear                             | Unclear                      | Unclear                        | Unclear               |
| Stout                               | 2020-12-06              | No                                | No                                  | Yes                          | Yes                                  | Unclear                         | Yes                             | Yes                                 | No                           | Unclear                        | High                  |
| Jolley                              | 2020-11-30              | Yes                               | No                                  | Yes                          | No                                   | Unclear                         | Unclear                         | Unclear                             | Unclear                      | Unclear                        | Unclear               |
| Coffman                             | 2020-11-16              | Yes                               | Yes                                 | Yes                          | No                                   | Unclear                         | Unclear                         | Unclear                             | Unclear                      | No                             | Unclear               |
| Coffman                             | 2020-11-16              | Yes                               | No                                  | Yes                          | No                                   | Unclear                         | Unclear                         | Unclear                             | Unclear                      | Unclear                        | Unclear               |
| Godbout                             | 2020-10-02              | No                                | No                                  | Yes                          | Yes                                  | Yes                             | Unclear                         | Yes                                 | No                           | Yes                            | High                  |
| Bajema                              | 2020-09-24              | No                                | No                                  | Yes                          | No                                   | Unclear                         | Yes                             | No                                  | Yes                          | Unclear                        | Moderate              |
| Bajema                              | 2020-09-24              | No                                | No                                  | Yes                          | No                                   | Unclear                         | Yes                             | No                                  | Yes                          | Unclear                        | Moderate              |
| Bajema                              | 2020-09-24              | No                                | No                                  | Yes                          | No                                   | Unclear                         | Yes                             | No                                  | Yes                          | Unclear                        | Moderate              |
| Bajema                              | 2020-09-24              | No                                | No                                  | Yes                          | No                                   | Unclear                         | Yes                             | No                                  | Yes                          | Unclear                        | Moderate              |
| Bajema                              | 2020-09-24              | No                                | No                                  | Yes                          | No                                   | Unclear                         | Yes                             | No                                  | Yes                          | Unclear                        | Moderate              |
| Bajema                              | 2020-09-24              | No                                | No                                  | No                           | No                                   | Unclear                         | Yes                             | No                                  | Yes                          | Unclear                        | High                  |
| Bajema                              | 2020-09-24              | No                                | No                                  | Yes                          | No                                   | Unclear                         | Yes                             | No                                  | Yes                          | Unclear                        | Moderate              |
| Bajema                              | 2020-09-24              | No                                | No                                  | Yes                          | No                                   | Unclear                         | Yes                             | No                                  | Yes                          | Unclear                        | Moderate              |
| Bajema                              | 2020-09-24              | No                                | No                                  | No                           | No                                   | Unclear                         | Yes                             | No                                  | Yes                          | Unclear                        | High                  |
| Bajema                              | 2020-09-24              | No                                | No                                  | Yes                          | No                                   | Unclear                         | Yes                             | No                                  | Yes                          | Unclear                        | Moderate              |
| Bajema                              | 2020-09-24              | No                                | No                                  | No                           | No                                   | Unclear                         | Yes                             | No                                  | Yes                          | Unclear                        | High                  |

| Article Author (Study Organization) | Sampling End Date (YMD) | Item 1: Appropriate sample frame* | Item 2: Probability sampling method | Item 3: Adequate sample size | Item 4: Subjects & setting described | Item 5: Good coverage of sample | Item 6: Sens > 90% & spec > 95% | Item 7: Same tests for all subjects | Item 8: Appropriate analysis | Item 9: Adequate response rate | Overall Risk of Bias† |
|-------------------------------------|-------------------------|-----------------------------------|-------------------------------------|------------------------------|--------------------------------------|---------------------------------|---------------------------------|-------------------------------------|------------------------------|--------------------------------|-----------------------|
| Bajema                              | 2020-09-24              | No                                | No                                  | Yes                          | No                                   | Unclear                         | Yes                             | No                                  | Yes                          | Unclear                        | Moderate              |
| Bajema                              | 2020-09-24              | No                                | No                                  | Yes                          | No                                   | Unclear                         | Yes                             | No                                  | Yes                          | Unclear                        | Moderate              |
| Bajema                              | 2020-09-24              | No                                | No                                  | No                           | No                                   | Unclear                         | Yes                             | No                                  | Yes                          | Unclear                        | High                  |
| Bajema                              | 2020-09-23              | No                                | No                                  | Yes                          | No                                   | Unclear                         | Yes                             | No                                  | Yes                          | Unclear                        | Moderate              |
| Bajema                              | 2020-09-23              | No                                | No                                  | Yes                          | No                                   | Unclear                         | Yes                             | No                                  | Yes                          | Unclear                        | Moderate              |
| Bajema                              | 2020-09-23              | No                                | No                                  | Yes                          | No                                   | Unclear                         | Yes                             | No                                  | Yes                          | Unclear                        | Moderate              |
| Bajema                              | 2020-09-23              | No                                | No                                  | Yes                          | No                                   | Unclear                         | Yes                             | No                                  | Yes                          | Unclear                        | Moderate              |
| Bajema                              | 2020-09-23              | No                                | No                                  | No                           | No                                   | Unclear                         | Yes                             | No                                  | Yes                          | Unclear                        | High                  |
| Bajema                              | 2020-09-23              | No                                | No                                  | Yes                          | No                                   | Unclear                         | Yes                             | No                                  | Yes                          | Unclear                        | Moderate              |
| Bajema                              | 2020-09-23              | No                                | No                                  | Yes                          | No                                   | Unclear                         | Yes                             | No                                  | Yes                          | Unclear                        | Moderate              |
| Bajema                              | 2020-09-23              | No                                | No                                  | No                           | No                                   | Unclear                         | Yes                             | No                                  | Yes                          | Unclear                        | High                  |
| Bajema                              | 2020-09-23              | No                                | No                                  | Yes                          | No                                   | Unclear                         | Yes                             | No                                  | Yes                          | Unclear                        | Moderate              |
| Bajema                              | 2020-09-23              | No                                | No                                  | Yes                          | No                                   | Unclear                         | Yes                             | No                                  | Yes                          | Unclear                        | Moderate              |
| Bajema                              | 2020-09-23              | No                                | No                                  | No                           | No                                   | Unclear                         | Yes                             | No                                  | Yes                          | Unclear                        | High                  |
| Bajema                              | 2020-09-23              | No                                | No                                  | Yes                          | No                                   | Unclear                         | Yes                             | No                                  | Yes                          | Unclear                        | Moderate              |
| Bajema                              | 2020-09-22              | No                                | No                                  | No                           | No                                   | Unclear                         | Yes                             | No                                  | Yes                          | Unclear                        | High                  |
| Bajema                              | 2020-09-22              | No                                | No                                  | Yes                          | No                                   | Unclear                         | Yes                             | No                                  | Yes                          | Unclear                        | Moderate              |
| Bajema                              | 2020-09-22              | No                                | No                                  | Yes                          | No                                   | Unclear                         | Yes                             | No                                  | Yes                          | Unclear                        | Moderate              |
| Bajema                              | 2020-09-22              | No                                | No                                  | Yes                          | No                                   | Unclear                         | Yes                             | No                                  | Yes                          | Unclear                        | Moderate              |
| Bajema                              | 2020-09-22              | No                                | No                                  | Yes                          | No                                   | Unclear                         | Yes                             | No                                  | Yes                          | Unclear                        | Moderate              |
| Bajema                              | 2020-09-22              | No                                | No                                  | Yes                          | No                                   | Unclear                         | Yes                             | No                                  | Yes                          | Unclear                        | Moderate              |
| Bajema                              | 2020-09-22              | No                                | No                                  | Yes                          | No                                   | Unclear                         | Yes                             | No                                  | Yes                          | Unclear                        | Moderate              |
| Bajema                              | 2020-09-22              | No                                | No                                  | Yes                          | No                                   | Unclear                         | Yes                             | No                                  | Yes                          | Unclear                        | Moderate              |
| Fountain Hills Times                | 2020-09-21              | Yes                               | Yes                                 | No                           | No                                   | Unclear                         | Unclear                         | Unclear                             | Unclear                      | Unclear                        | Unclear               |
| Bajema                              | 2020-09-19              | No                                | No                                  | Yes                          | No                                   | Unclear                         | Yes                             | No                                  | Yes                          | Unclear                        | Moderate              |



| Article Author (Study Organization) | Sampling End Date (YMD) | Item 1: Appropriate sample frame* | Item 2: Probability sampling method | Item 3: Adequate sample size | Item 4: Subjects & setting described | Item 5: Good coverage of sample | Item 6: Sens > 90% & spec > 95% | Item 7: Same tests for all subjects | Item 8: Appropriate analysis | Item 9: Adequate response rate | Overall Risk of Bias† |
|-------------------------------------|-------------------------|-----------------------------------|-------------------------------------|------------------------------|--------------------------------------|---------------------------------|---------------------------------|-------------------------------------|------------------------------|--------------------------------|-----------------------|
| Bajema                              | 2020-09-11              | No                                | No                                  | Yes                          | No                                   | Unclear                         | Yes                             | No                                  | Yes                          | Unclear                        | Moderate              |
| Bajema                              | 2020-09-10              | No                                | No                                  | Yes                          | No                                   | Unclear                         | Yes                             | No                                  | Yes                          | Unclear                        | Moderate              |
| Bajema                              | 2020-09-10              | No                                | No                                  | Yes                          | No                                   | Unclear                         | Yes                             | No                                  | Yes                          | Unclear                        | Moderate              |
| Bajema                              | 2020-09-10              | No                                | No                                  | Yes                          | No                                   | Unclear                         | Yes                             | No                                  | Yes                          | Unclear                        | Moderate              |
| Bajema                              | 2020-09-10              | No                                | No                                  | Yes                          | No                                   | Unclear                         | Yes                             | No                                  | Yes                          | Unclear                        | Moderate              |
| Bajema                              | 2020-09-10              | No                                | No                                  | Yes                          | No                                   | Unclear                         | Yes                             | No                                  | Yes                          | Unclear                        | Moderate              |
| Bajema                              | 2020-09-10              | No                                | No                                  | Yes                          | No                                   | Unclear                         | Yes                             | No                                  | Yes                          | Unclear                        | Moderate              |
| Bajema                              | 2020-09-10              | No                                | No                                  | Yes                          | No                                   | Unclear                         | Yes                             | No                                  | Yes                          | Unclear                        | Moderate              |
| Bajema                              | 2020-09-10              | No                                | No                                  | Yes                          | No                                   | Unclear                         | Yes                             | No                                  | Yes                          | Unclear                        | Moderate              |
| Bajema                              | 2020-09-10              | No                                | No                                  | Yes                          | No                                   | Unclear                         | Yes                             | No                                  | Yes                          | Unclear                        | Moderate              |
| Bajema                              | 2020-09-10              | No                                | No                                  | Yes                          | No                                   | Unclear                         | Yes                             | No                                  | Yes                          | Unclear                        | Moderate              |
| Bajema                              | 2020-09-10              | No                                | No                                  | Yes                          | No                                   | Unclear                         | Yes                             | No                                  | Yes                          | Unclear                        | Moderate              |
| Bajema                              | 2020-09-10              | No                                | No                                  | Yes                          | No                                   | Unclear                         | Yes                             | No                                  | Yes                          | Unclear                        | Moderate              |
| Bajema                              | 2020-09-10              | No                                | No                                  | Yes                          | No                                   | Unclear                         | Yes                             | No                                  | Yes                          | Unclear                        | Moderate              |
| Bajema                              | 2020-09-10              | No                                | No                                  | No                           | No                                   | Unclear                         | Yes                             | No                                  | Yes                          | Unclear                        | High                  |
| Bajema                              | 2020-09-10              | No                                | No                                  | No                           | No                                   | Unclear                         | Yes                             | No                                  | Yes                          | Unclear                        | High                  |
| Bajema                              | 2020-09-10              | No                                | No                                  | Yes                          | No                                   | Unclear                         | Yes                             | No                                  | Yes                          | Unclear                        | Moderate              |
| Bajema                              | 2020-09-10              | No                                | No                                  | Yes                          | No                                   | Unclear                         | Yes                             | No                                  | Yes                          | Unclear                        | Moderate              |
| Bajema                              | 2020-09-10              | No                                | No                                  | Yes                          | No                                   | Unclear                         | Yes                             | No                                  | Yes                          | Unclear                        | Moderate              |
| Bajema                              | 2020-09-10              | No                                | No                                  | Yes                          | No                                   | Unclear                         | Yes                             | No                                  | Yes                          | Unclear                        | Moderate              |
| Bajema                              | 2020-09-10              | No                                | No                                  | Yes                          | No                                   | Unclear                         | Yes                             | No                                  | Yes                          | Unclear                        | Moderate              |
| Jimenez-Kurlander                   | 2020-09-10              | Yes                               | No                                  | No                           | Yes                                  | Unclear                         | Unclear                         | Unclear                             | No                           | Unclear                        | High                  |





| Article Author (Study Organization) | Sampling End Date (YMD) | Item 1: Appropriate sample frame* | Item 2: Probability sampling method | Item 3: Adequate sample size | Item 4: Subjects & setting described | Item 5: Good coverage of sample | Item 6: Sens > 90% & spec > 95% | Item 7: Same tests for all subjects | Item 8: Appropriate analysis | Item 9: Adequate response rate | Overall Risk of Bias† |
|-------------------------------------|-------------------------|-----------------------------------|-------------------------------------|------------------------------|--------------------------------------|---------------------------------|---------------------------------|-------------------------------------|------------------------------|--------------------------------|-----------------------|
| Bajema                              | 2020-09-05              | No                                | No                                  | Yes                          | No                                   | Unclear                         | Yes                             | No                                  | Yes                          | Unclear                        | Moderate              |
| Bajema                              | 2020-09-04              | No                                | No                                  | Yes                          | No                                   | Unclear                         | Yes                             | No                                  | Yes                          | Unclear                        | Moderate              |
| Bajema                              | 2020-09-04              | No                                | No                                  | Yes                          | No                                   | Unclear                         | Yes                             | No                                  | Yes                          | Unclear                        | Moderate              |
| Bajema                              | 2020-09-03              | No                                | No                                  | Yes                          | No                                   | Unclear                         | Yes                             | No                                  | Yes                          | Unclear                        | Moderate              |
| Bajema                              | 2020-09-03              | No                                | No                                  | Yes                          | No                                   | Unclear                         | Yes                             | No                                  | Yes                          | Unclear                        | Moderate              |
| Bajema                              | 2020-09-03              | No                                | No                                  | Yes                          | No                                   | Unclear                         | Yes                             | No                                  | Yes                          | Unclear                        | Moderate              |
| Bajema                              | 2020-09-03              | No                                | No                                  | Yes                          | No                                   | Unclear                         | Yes                             | No                                  | Yes                          | Unclear                        | Moderate              |
| Bajema                              | 2020-09-03              | No                                | No                                  | Yes                          | No                                   | Unclear                         | Yes                             | No                                  | Yes                          | Unclear                        | Moderate              |
| Bajema                              | 2020-09-02              | No                                | No                                  | Yes                          | No                                   | Unclear                         | Yes                             | No                                  | Yes                          | Unclear                        | Moderate              |
| Bajema                              | 2020-09-01              | No                                | No                                  | Yes                          | No                                   | Unclear                         | Yes                             | No                                  | Yes                          | Unclear                        | Moderate              |
| Maleck                              | 2020-08-31              | Yes                               | Unclear                             | No                           | No                                   | Unclear                         | Yes                             | Yes                                 | Yes                          | No                             | Moderate              |
| Halbrook                            | 2020-08-31              | Yes                               | Unclear                             | Yes                          | Yes                                  | Yes                             | Unclear                         | Yes                                 | No                           | Unclear                        | Moderate              |
| Halbrook                            | 2020-08-31              | Yes                               | Unclear                             | Yes                          | Yes                                  | Yes                             | Unclear                         | Yes                                 | No                           | Unclear                        | Moderate              |
| Bajema                              | 2020-08-29              | No                                | No                                  | Yes                          | No                                   | Unclear                         | Yes                             | No                                  | Yes                          | Unclear                        | Moderate              |
| Bajema                              | 2020-08-27              | No                                | No                                  | Yes                          | No                                   | Unclear                         | Yes                             | No                                  | Yes                          | Unclear                        | Moderate              |
| Bajema                              | 2020-08-27              | No                                | No                                  | Yes                          | No                                   | Unclear                         | Yes                             | No                                  | Yes                          | Unclear                        | Moderate              |
| Bajema                              | 2020-08-27              | No                                | No                                  | Yes                          | No                                   | Unclear                         | Yes                             | No                                  | Yes                          | Unclear                        | Moderate              |
| Bajema                              | 2020-08-27              | No                                | No                                  | Yes                          | No                                   | Unclear                         | Yes                             | No                                  | Yes                          | Unclear                        | Moderate              |
| Bajema                              | 2020-08-27              | No                                | No                                  | Yes                          | No                                   | Unclear                         | Yes                             | No                                  | Yes                          | Unclear                        | Moderate              |
| Bajema                              | 2020-08-27              | No                                | No                                  | Yes                          | No                                   | Unclear                         | Yes                             | No                                  | Yes                          | Unclear                        | Moderate              |
| Bajema                              | 2020-08-27              | No                                | No                                  | Yes                          | No                                   | Unclear                         | Yes                             | No                                  | Yes                          | Unclear                        | Moderate              |
| Bajema                              | 2020-08-27              | No                                | No                                  | Yes                          | No                                   | Unclear                         | Yes                             | No                                  | Yes                          | Unclear                        | Moderate              |

| Article Author (Study Organization) | Sampling End Date (YMD) | Item 1: Appropriate sample frame* | Item 2: Probability sampling method | Item 3: Adequate sample size | Item 4: Subjects & setting described | Item 5: Good coverage of sample | Item 6: Sens > 90% & spec > 95% | Item 7: Same tests for all subjects | Item 8: Appropriate analysis | Item 9: Adequate response rate | Overall Risk of Bias† |
|-------------------------------------|-------------------------|-----------------------------------|-------------------------------------|------------------------------|--------------------------------------|---------------------------------|---------------------------------|-------------------------------------|------------------------------|--------------------------------|-----------------------|
| Bajema                              | 2020-08-27              | No                                | No                                  | Yes                          | No                                   | Unclear                         | Yes                             | No                                  | Yes                          | Unclear                        | Moderate              |
| Bajema                              | 2020-08-27              | No                                | No                                  | Yes                          | No                                   | Unclear                         | Yes                             | No                                  | Yes                          | Unclear                        | Moderate              |
| Bajema                              | 2020-08-27              | No                                | No                                  | Yes                          | No                                   | Unclear                         | Yes                             | No                                  | Yes                          | Unclear                        | Moderate              |
| Bajema                              | 2020-08-27              | No                                | No                                  | Yes                          | No                                   | Unclear                         | Yes                             | No                                  | Yes                          | Unclear                        | Moderate              |
| Bajema                              | 2020-08-27              | No                                | No                                  | No                           | No                                   | Unclear                         | Yes                             | No                                  | Yes                          | Unclear                        | High                  |
| Bajema                              | 2020-08-27              | No                                | No                                  | Yes                          | No                                   | Unclear                         | Yes                             | No                                  | Yes                          | Unclear                        | Moderate              |
| Bajema                              | 2020-08-27              | No                                | No                                  | No                           | No                                   | Unclear                         | Yes                             | No                                  | Yes                          | Unclear                        | High                  |
| Bajema                              | 2020-08-27              | No                                | No                                  | Yes                          | No                                   | Unclear                         | Yes                             | No                                  | Yes                          | Unclear                        | Moderate              |
| Bajema                              | 2020-08-27              | No                                | No                                  | Yes                          | No                                   | Unclear                         | Yes                             | No                                  | Yes                          | Unclear                        | Moderate              |
| Bajema                              | 2020-08-27              | No                                | No                                  | Yes                          | No                                   | Unclear                         | Yes                             | No                                  | Yes                          | Unclear                        | Moderate              |
| Bajema                              | 2020-08-27              | No                                | No                                  | Yes                          | No                                   | Unclear                         | Yes                             | No                                  | Yes                          | Unclear                        | Moderate              |
| Bajema                              | 2020-08-26              | No                                | No                                  | Yes                          | No                                   | Unclear                         | Yes                             | No                                  | Yes                          | Unclear                        | Moderate              |
| Bajema                              | 2020-08-26              | No                                | No                                  | Yes                          | No                                   | Unclear                         | Yes                             | No                                  | Yes                          | Unclear                        | Moderate              |
| Bajema                              | 2020-08-26              | No                                | No                                  | Yes                          | No                                   | Unclear                         | Yes                             | No                                  | Yes                          | Unclear                        | Moderate              |
| Bajema                              | 2020-08-26              | No                                | No                                  | Yes                          | No                                   | Unclear                         | Yes                             | No                                  | Yes                          | Unclear                        | Moderate              |
| Bajema                              | 2020-08-26              | No                                | No                                  | Yes                          | No                                   | Unclear                         | Yes                             | No                                  | Yes                          | Unclear                        | Moderate              |
| Bajema                              | 2020-08-26              | No                                | No                                  | Yes                          | No                                   | Unclear                         | Yes                             | No                                  | Yes                          | Unclear                        | Moderate              |
| Bajema                              | 2020-08-26              | No                                | No                                  | Yes                          | No                                   | Unclear                         | Yes                             | No                                  | Yes                          | Unclear                        | Moderate              |
| Bajema                              | 2020-08-26              | No                                | No                                  | Yes                          | No                                   | Unclear                         | Yes                             | No                                  | Yes                          | Unclear                        | Moderate              |
| Bajema                              | 2020-08-26              | No                                | No                                  | Yes                          | No                                   | Unclear                         | Yes                             | No                                  | Yes                          | Unclear                        | Moderate              |
| Bajema                              | 2020-08-26              | No                                | No                                  | Yes                          | No                                   | Unclear                         | Yes                             | No                                  | Yes                          | Unclear                        | Moderate              |
| Bajema                              | 2020-08-26              | No                                | No                                  | Yes                          | No                                   | Unclear                         | Yes                             | No                                  | Yes                          | Unclear                        | Moderate              |
| Bajema                              | 2020-08-26              | No                                | No                                  | Yes                          | No                                   | Unclear                         | Yes                             | No                                  | Yes                          | Unclear                        | Moderate              |
| Bajema                              | 2020-08-26              | No                                | No                                  | Yes                          | No                                   | Unclear                         | Yes                             | No                                  | Yes                          | Unclear                        | Moderate              |



| Article Author (Study Organization) | Sampling End Date (YMD) | Item 1: Appropriate sample frame* | Item 2: Probability sampling method | Item 3: Adequate sample size | Item 4: Subjects & setting described | Item 5: Good coverage of sample | Item 6: Sens > 90% & spec > 95% | Item 7: Same tests for all subjects | Item 8: Appropriate analysis | Item 9: Adequate response rate | Overall Risk of Bias† |
|-------------------------------------|-------------------------|-----------------------------------|-------------------------------------|------------------------------|--------------------------------------|---------------------------------|---------------------------------|-------------------------------------|------------------------------|--------------------------------|-----------------------|
| Bajema                              | 2020-08-17              | No                                | No                                  | Yes                          | No                                   | Unclear                         | Yes                             | No                                  | Yes                          | Unclear                        | Moderate              |
| Bruckner                            | 2020-08-16              | Yes                               | Yes                                 | Yes                          | Yes                                  | Yes                             | Yes                             | Yes                                 | Yes                          | No                             | Low                   |
| Brant-Zawadzki                      | 2020-08-15              | Yes                               | No                                  | No                           | Yes                                  | Unclear                         | Yes                             | Yes                                 | No                           | Unclear                        | High                  |
| Brant-Zawadzki                      | 2020-08-15              | Yes                               | No                                  | Yes                          | Yes                                  | Yes                             | Yes                             | Yes                                 | No                           | Unclear                        | High                  |
| Sabourin                            | 2020-08-15              | Yes                               | No                                  | No                           | Yes                                  | Unclear                         | No                              | Yes                                 | No                           | Unclear                        | High                  |
| Heim                                | 2020-08-15              | Yes                               | Yes                                 | Yes                          | No                                   | Unclear                         | Unclear                         | Unclear                             | Unclear                      | Unclear                        | Unclear               |
| Bajema                              | 2020-08-14              | No                                | No                                  | Yes                          | No                                   | Unclear                         | Yes                             | No                                  | Yes                          | Unclear                        | Moderate              |
| Bajema                              | 2020-08-13              | No                                | No                                  | Yes                          | No                                   | Unclear                         | Yes                             | No                                  | Yes                          | Unclear                        | Moderate              |
| Bajema                              | 2020-08-13              | No                                | No                                  | Yes                          | No                                   | Unclear                         | Yes                             | No                                  | Yes                          | Unclear                        | Moderate              |
| Bajema                              | 2020-08-13              | No                                | No                                  | Yes                          | No                                   | Unclear                         | Yes                             | No                                  | Yes                          | Unclear                        | Moderate              |
| Bajema                              | 2020-08-13              | No                                | No                                  | Yes                          | No                                   | Unclear                         | Yes                             | No                                  | Yes                          | Unclear                        | Moderate              |
| Bajema                              | 2020-08-13              | No                                | No                                  | Yes                          | No                                   | Unclear                         | Yes                             | No                                  | Yes                          | Unclear                        | Moderate              |
| Bajema                              | 2020-08-13              | No                                | No                                  | Yes                          | No                                   | Unclear                         | Yes                             | No                                  | Yes                          | Unclear                        | Moderate              |
| Bajema                              | 2020-08-13              | No                                | No                                  | Yes                          | No                                   | Unclear                         | Yes                             | No                                  | Yes                          | Unclear                        | Moderate              |
| Bajema                              | 2020-08-13              | No                                | No                                  | Yes                          | No                                   | Unclear                         | Yes                             | No                                  | Yes                          | Unclear                        | Moderate              |
| Bajema                              | 2020-08-13              | No                                | No                                  | Yes                          | No                                   | Unclear                         | Yes                             | No                                  | Yes                          | Unclear                        | Moderate              |
| Bajema                              | 2020-08-13              | No                                | No                                  | Yes                          | No                                   | Unclear                         | Yes                             | No                                  | Yes                          | Unclear                        | Moderate              |
| Bajema                              | 2020-08-13              | No                                | No                                  | Yes                          | No                                   | Unclear                         | Yes                             | No                                  | Yes                          | Unclear                        | Moderate              |
| Bajema                              | 2020-08-13              | No                                | No                                  | No                           | No                                   | Unclear                         | Yes                             | No                                  | Yes                          | Unclear                        | High                  |
| Bajema                              | 2020-08-13              | No                                | No                                  | Yes                          | No                                   | Unclear                         | Yes                             | No                                  | Yes                          | Unclear                        | Moderate              |

| Article Author (Study Organization) | Sampling End Date (YMD) | Item 1: Appropriate sample frame* | Item 2: Probability sampling method | Item 3: Adequate sample size | Item 4: Subjects & setting described | Item 5: Good coverage of sample | Item 6: Sens > 90% & spec > 95% | Item 7: Same tests for all subjects | Item 8: Appropriate analysis | Item 9: Adequate response rate | Overall Risk of Bias <sup>†</sup> |
|-------------------------------------|-------------------------|-----------------------------------|-------------------------------------|------------------------------|--------------------------------------|---------------------------------|---------------------------------|-------------------------------------|------------------------------|--------------------------------|-----------------------------------|
| Bajema                              | 2020-08-12              | No                                | No                                  | No                           | No                                   | Unclear                         | Yes                             | No                                  | Yes                          | Unclear                        | High                              |
| Bajema                              | 2020-08-11              | No                                | No                                  | No                           | No                                   | Unclear                         | Yes                             | No                                  | Yes                          | Unclear                        | High                              |
| Bajema                              | 2020-08-11              | No                                | No                                  | No                           | No                                   | Unclear                         | Yes                             | No                                  | Yes                          | Unclear                        | High                              |
| Bajema                              | 2020-08-11              | No                                | No                                  | Yes                          | No                                   | Unclear                         | Yes                             | No                                  | Yes                          | Unclear                        | Moderate                          |
| Bajema                              | 2020-08-11              | No                                | No                                  | No                           | No                                   | Unclear                         | Yes                             | No                                  | Yes                          | Unclear                        | High                              |
| Bajema                              | 2020-08-11              | No                                | No                                  | No                           | No                                   | Unclear                         | Yes                             | No                                  | Yes                          | Unclear                        | High                              |
| Bajema                              | 2020-08-11              | No                                | No                                  | No                           | No                                   | Unclear                         | Yes                             | No                                  | Yes                          | Unclear                        | High                              |
| Bajema                              | 2020-08-11              | No                                | No                                  | Yes                          | No                                   | Unclear                         | Yes                             | No                                  | Yes                          | Unclear                        | Moderate                          |
| Bajema                              | 2020-08-11              | No                                | No                                  | Yes                          | No                                   | Unclear                         | Yes                             | No                                  | Yes                          | Unclear                        | Moderate                          |
| Bajema                              | 2020-08-11              | No                                | No                                  | Yes                          | No                                   | Unclear                         | Yes                             | No                                  | Yes                          | Unclear                        | Moderate                          |
| Bajema                              | 2020-08-11              | No                                | No                                  | Yes                          | No                                   | Unclear                         | Yes                             | No                                  | Yes                          | Unclear                        | Moderate                          |
| Bajema                              | 2020-08-11              | No                                | No                                  | Yes                          | No                                   | Unclear                         | Yes                             | No                                  | Yes                          | Unclear                        | Moderate                          |
| Bajema                              | 2020-08-11              | No                                | No                                  | Yes                          | No                                   | Unclear                         | Yes                             | No                                  | Yes                          | Unclear                        | Moderate                          |
| Bajema                              | 2020-08-11              | No                                | No                                  | Yes                          | No                                   | Unclear                         | Yes                             | No                                  | Yes                          | Unclear                        | Moderate                          |
| Bajema                              | 2020-08-11              | No                                | No                                  | No                           | No                                   | Unclear                         | Yes                             | No                                  | Yes                          | Unclear                        | High                              |
| Bajema                              | 2020-08-11              | No                                | No                                  | Yes                          | No                                   | Unclear                         | Yes                             | No                                  | Yes                          | Unclear                        | Moderate                          |
| Bajema                              | 2020-08-11              | No                                | No                                  | Yes                          | No                                   | Unclear                         | Yes                             | No                                  | Yes                          | Unclear                        | Moderate                          |
| Bajema                              | 2020-08-11              | No                                | No                                  | Yes                          | No                                   | Unclear                         | Yes                             | No                                  | Yes                          | Unclear                        | Moderate                          |
| Bajema                              | 2020-08-11              | No                                | No                                  | No                           | No                                   | Unclear                         | Yes                             | No                                  | Yes                          | Unclear                        | High                              |
| Bajema                              | 2020-08-11              | No                                | No                                  | Yes                          | No                                   | Unclear                         | Yes                             | No                                  | Yes                          | Unclear                        | Moderate                          |
| Bajema                              | 2020-08-11              | No                                | No                                  | Yes                          | No                                   | Unclear                         | Yes                             | No                                  | Yes                          | Unclear                        | Moderate                          |
| Bajema                              | 2020-08-11              | No                                | No                                  | Yes                          | No                                   | Unclear                         | Yes                             | No                                  | Yes                          | Unclear                        | Moderate                          |
| Bajema                              | 2020-08-11              | No                                | No                                  | No                           | No                                   | Unclear                         | Yes                             | No                                  | Yes                          | Unclear                        | High                              |
| Bajema                              | 2020-08-11              | No                                | No                                  | Yes                          | No                                   | Unclear                         | Yes                             | No                                  | Yes                          | Unclear                        | Moderate                          |
| Bajema                              | 2020-08-11              | No                                | No                                  | Yes                          | No                                   | Unclear                         | Yes                             | No                                  | Yes                          | Unclear                        | Moderate                          |

| Article Author (Study Organization) | Sampling End Date (YMD) | Item 1: Appropriate sample frame* | Item 2: Probability sampling method | Item 3: Adequate sample size | Item 4: Subjects & setting described | Item 5: Good coverage of sample | Item 6: Sens > 90% & spec > 95% | Item 7: Same tests for all subjects | Item 8: Appropriate analysis | Item 9: Adequate response rate | Overall Risk of Bias† |
|-------------------------------------|-------------------------|-----------------------------------|-------------------------------------|------------------------------|--------------------------------------|---------------------------------|---------------------------------|-------------------------------------|------------------------------|--------------------------------|-----------------------|
| Bajema                              | 2020-08-10              | No                                | No                                  | Yes                          | No                                   | Unclear                         | Yes                             | No                                  | Yes                          | Unclear                        | Moderate              |
| Bajema                              | 2020-08-10              | No                                | No                                  | Yes                          | No                                   | Unclear                         | Yes                             | No                                  | Yes                          | Unclear                        | Moderate              |
| Bajema                              | 2020-08-10              | No                                | No                                  | Yes                          | No                                   | Unclear                         | Yes                             | No                                  | Yes                          | Unclear                        | Moderate              |
| Bajema                              | 2020-08-10              | No                                | No                                  | No                           | No                                   | Unclear                         | Yes                             | No                                  | Yes                          | Unclear                        | High                  |
| Bajema                              | 2020-08-10              | No                                | No                                  | Yes                          | No                                   | Unclear                         | Yes                             | No                                  | Yes                          | Unclear                        | Moderate              |
| Bajema                              | 2020-08-08              | No                                | No                                  | Yes                          | No                                   | Unclear                         | Yes                             | No                                  | Yes                          | Unclear                        | Moderate              |
| Bajema                              | 2020-08-07              | No                                | No                                  | Yes                          | No                                   | Unclear                         | Yes                             | No                                  | Yes                          | Unclear                        | Moderate              |
| Bajema                              | 2020-08-07              | No                                | No                                  | Yes                          | No                                   | Unclear                         | Yes                             | No                                  | Yes                          | Unclear                        | Moderate              |
| Bajema                              | 2020-08-05              | No                                | No                                  | Yes                          | No                                   | Unclear                         | Yes                             | No                                  | Yes                          | Unclear                        | Moderate              |
| Bajema                              | 2020-08-05              | No                                | No                                  | Yes                          | No                                   | Unclear                         | Yes                             | No                                  | Yes                          | Unclear                        | Moderate              |
| Bajema                              | 2020-08-04              | No                                | No                                  | Yes                          | No                                   | Unclear                         | Yes                             | No                                  | Yes                          | Unclear                        | Moderate              |
| Bajema                              | 2020-08-03              | No                                | No                                  | Yes                          | No                                   | Unclear                         | Yes                             | No                                  | Yes                          | Unclear                        | Moderate              |
| Bajema                              | 2020-08-03              | No                                | No                                  | Yes                          | No                                   | Unclear                         | Yes                             | No                                  | Yes                          | Unclear                        | Moderate              |
| Bajema                              | 2020-08-02              | No                                | No                                  | Yes                          | No                                   | Unclear                         | Yes                             | No                                  | Yes                          | Unclear                        | Moderate              |
| Coffman                             | 2020-07-31              | Unclear                           | Unclear                             | Yes                          | No                                   | Unclear                         | Unclear                         | Unclear                             | Unclear                      | Unclear                        | Unclear               |
| Feehan                              | 2020-07-31              | Yes                               | Yes                                 | Yes                          | Yes                                  | Unclear                         | Yes                             | Yes                                 | No                           | Yes                            | Moderate              |
| Vassallo                            | 2020-07-31              | No                                | Yes                                 | Yes                          | Yes                                  | Unclear                         | Unclear                         | Yes                                 | No                           | Unclear                        | Moderate              |
| Azzi                                | 2020-07-29              | Yes                               | No                                  | Yes                          | No                                   | No                              | Yes                             | Yes                                 | No                           | Unclear                        | Moderate              |
| Nicholson                           | 2020-07-28              | Yes                               | No                                  | Yes                          | No                                   | Unclear                         | Yes                             | No                                  | No                           | Unclear                        | High                  |
| Spencer                             | 2020-07-27              | No                                | No                                  | Yes                          | No                                   | Unclear                         | Unclear                         | Yes                                 | No                           | Unclear                        | High                  |
| Yamaki                              | 2020-07-27              | No                                | No                                  | Yes                          | Yes                                  | Unclear                         | Yes                             | Yes                                 | No                           | Unclear                        | High                  |

| Article Author (Study Organization) | Sampling End Date (YMD) | Item 1: Appropriate sample frame* | Item 2: Probability sampling method | Item 3: Adequate sample size | Item 4: Subjects & setting described | Item 5: Good coverage of sample | Item 6: Sens > 90% & spec > 95% | Item 7: Same tests for all subjects | Item 8: Appropriate analysis | Item 9: Adequate response rate | Overall Risk of Bias† |
|-------------------------------------|-------------------------|-----------------------------------|-------------------------------------|------------------------------|--------------------------------------|---------------------------------|---------------------------------|-------------------------------------|------------------------------|--------------------------------|-----------------------|
| Haizler-Cohen                       | 2020-07-24              | Yes                               | Unclear                             | Yes                          | Yes                                  | Unclear                         | Unclear                         | Yes                                 | No                           | Unclear                        | High                  |
| Klawiter                            | 2020-07-23              | No                                | No                                  | No                           | No                                   | Unclear                         | Yes                             | Yes                                 | No                           | Unclear                        | High                  |
| Klawiter                            | 2020-07-23              | Yes                               | No                                  | No                           | No                                   | Unclear                         | Yes                             | Yes                                 | No                           | Unclear                        | High                  |
| Mahajan                             | 2020-07-22              | Yes                               | Yes                                 | No                           | Yes                                  | No                              | Yes                             | Yes                                 | No                           | No                             | High                  |
| Mahajan                             | 2020-07-22              | Yes                               | Yes                                 | No                           | Yes                                  | No                              | Yes                             | Yes                                 | No                           | No                             | High                  |
| McMillan                            | 2020-07-20              | Yes                               | Yes                                 | Yes                          | No                                   | Unclear                         | Unclear                         | Unclear                             | No                           | Unclear                        | Unclear               |
| Lopez                               | 2020-07-20              | Yes                               | No                                  | Yes                          | Yes                                  | Yes                             | Yes                             | Yes                                 | No                           | Yes                            | Moderate              |
| Zauzmer                             | 2020-07-15              | Yes                               | No                                  | Yes                          | No                                   | Unclear                         | Unclear                         | No                                  | No                           | Unclear                        | High                  |
| Jin                                 | 2020-07-15              | No                                | No                                  | Yes                          | Yes                                  | No                              | Unclear                         | Yes                                 | No                           | Unclear                        | High                  |
| Reuben                              | 2020-07-15              | Yes                               | No                                  | No                           | Yes                                  | Unclear                         | Unclear                         | Yes                                 | No                           | Yes                            | High                  |
| Kaufman                             | 2020-07-10              | Yes                               | No                                  | Yes                          | No                                   | Unclear                         | Unclear                         | No                                  | No                           | Unclear                        | High                  |
| Shah                                | 2020-07-09              | Yes                               | Unclear                             | No                           | Yes                                  | No                              | Unclear                         | No                                  | No                           | Unclear                        | High                  |
| Shah                                | 2020-07-09              | Yes                               | Unclear                             | No                           | Yes                                  | No                              | Unclear                         | No                                  | No                           | Unclear                        | High                  |
| Mohr                                | 2020-07-08              | Yes                               | No                                  | Yes                          | Yes                                  | Yes                             | Yes                             | Yes                                 | No                           | Unclear                        | Moderate              |
| Dimcheff                            | 2020-07-08              | Yes                               | No                                  | Yes                          | Yes                                  | Yes                             | Yes                             | Yes                                 | No                           | No                             | Moderate              |
| Kamath                              | 2020-07-07              | No                                | No                                  | Yes                          | Yes                                  | No                              | Yes                             | Yes                                 | No                           | Unclear                        | High                  |
| Childs                              | 2020-07-06              | Yes                               | No                                  | Yes                          | No                                   | No                              | No                              | Yes                                 | No                           | Unclear                        | High                  |
| Stadlbauer                          | 2020-07-05              | No                                | Yes                                 | Yes                          | Yes                                  | No                              | Yes                             | Yes                                 | No                           | Unclear                        | High                  |
| Stadlbauer                          | 2020-07-05              | No                                | No                                  | Yes                          | Yes                                  | No                              | Yes                             | Yes                                 | No                           | Unclear                        | High                  |
| Freeman                             | 2020-07-04              | Yes                               | No                                  | Yes                          | Yes                                  | No                              | Unclear                         | Yes                                 | No                           | Unclear                        | High                  |
| Walker                              | 2020-07-01              | Unclear                           | Unclear                             | Unclear                      | Unclear                              | Unclear                         | Unclear                         | Unclear                             | Unclear                      | Unclear                        | Moderate              |



| Article Author (Study Organization) | Sampling End Date (YMD) | Item 1: Appropriate sample frame* | Item 2: Probability sampling method | Item 3: Adequate sample size | Item 4: Subjects & setting described | Item 5: Good coverage of sample | Item 6: Sens > 90% & spec > 95% | Item 7: Same tests for all subjects | Item 8: Appropriate analysis | Item 9: Adequate response rate | Overall Risk of Bias <sup>†</sup> |
|-------------------------------------|-------------------------|-----------------------------------|-------------------------------------|------------------------------|--------------------------------------|---------------------------------|---------------------------------|-------------------------------------|------------------------------|--------------------------------|-----------------------------------|
| Barrett                             | 2020-06-30              | Yes                               | No                                  | Yes                          | Yes                                  | Yes                             | Yes                             | Yes                                 | No                           | Yes                            | Moderate                          |
| Wilkins                             | 2020-06-30              | Yes                               | No                                  | Yes                          | Yes                                  | Yes                             | Yes                             | Yes                                 | Yes                          | No                             | Moderate                          |
| Nailescu                            | 2020-06-30              | Yes                               | No                                  | No                           | Yes                                  | Yes                             | Yes                             | Yes                                 | No                           | Unclear                        | High                              |
| Viglienzoni                         | 2020-06-30              | Yes                               | No                                  | No                           | No                                   | Unclear                         | Unclear                         | Yes                                 | No                           | Unclear                        | High                              |
| Samore                              | 2020-06-30              | Yes                               | Yes                                 | Yes                          | Yes                                  | Yes                             | No                              | Yes                                 | Yes                          | No                             | Moderate                          |
| Rivas                               | 2020-06-28              | Yes                               | No                                  | Yes                          | Yes                                  | Yes                             | Yes                             | Yes                                 | No                           | No                             | Moderate                          |
| Patel                               | 2020-06-27              | Yes                               | No                                  | No                           | Yes                                  | Unclear                         | Yes                             | Yes                                 | No                           | No                             | High                              |
| Baker                               | 2020-06-26              | Yes                               | No                                  | Yes                          | Yes                                  | Yes                             | Yes                             | Yes                                 | Yes                          | No                             | Moderate                          |
| McBride                             | 2020-06-25              | Yes                               | No                                  | Yes                          | Unclear                              | Unclear                         | Unclear                         | Yes                                 | No                           | Unclear                        | High                              |
| Mahajan                             | 2020-06-23              | Yes                               | Yes                                 | No                           | Yes                                  | Yes                             | Yes                             | Yes                                 | No                           | Yes                            | Moderate                          |
| Moscola                             | 2020-06-23              | Yes                               | No                                  | Yes                          | Yes                                  | Yes                             | No                              | No                                  | No                           | Unclear                        | High                              |
| Barzin                              | 2020-06-19              | No                                | No                                  | Yes                          | Yes                                  | No                              | Yes                             | Yes                                 | Yes                          | Unclear                        | Moderate                          |
| Spectrum News Staff                 | 2020-06-19              | Yes                               | No                                  | Yes                          | No                                   | Yes                             | Unclear                         | Unclear                             | No                           | No                             | High                              |
| Self                                | 2020-06-19              | Yes                               | No                                  | Yes                          | Yes                                  | Unclear                         | Yes                             | Yes                                 | No                           | Unclear                        | Moderate                          |
| Dodd                                | 2020-06-15              | No                                | Yes                                 | Yes                          | Yes                                  | Yes                             | Yes                             | Yes                                 | No                           | Yes                            | Moderate                          |
| Reifer                              | 2020-06-15              | No                                | No                                  | Yes                          | Yes                                  | Unclear                         | Unclear                         | Yes                                 | No                           | Unclear                        | High                              |
| Sutton                              | 2020-06-15              | No                                | Yes                                 | Yes                          | No                                   | Unclear                         | Yes                             | Yes                                 | No                           | Unclear                        | High                              |
| Rebeiro                             | 2020-06-15              | Yes                               | No                                  | Yes                          | No                                   | Unclear                         | Unclear                         | Yes                                 | No                           | Unclear                        | High                              |
| Anand                               | 2020-06-15              | No                                | Yes                                 | Yes                          | Yes                                  | Yes                             | Yes                             | Yes                                 | Yes                          | Yes                            | Moderate                          |
| Akinbami                            | 2020-06-13              | Yes                               | No                                  | Yes                          | Yes                                  | Unclear                         | Yes                             | Yes                                 | No                           | Unclear                        | Moderate                          |
| Dora                                | 2020-06-12              | Yes                               | No                                  | No                           | No                                   | Unclear                         | Yes                             | Yes                                 | No                           | Unclear                        | High                              |

| Article Author (Study Organization) | Sampling End Date (YMD) | Item 1: Appropriate sample frame* | Item 2: Probability sampling method | Item 3: Adequate sample size | Item 4: Subjects & setting described | Item 5: Good coverage of sample | Item 6: Sens > 90% & spec > 95% | Item 7: Same tests for all subjects | Item 8: Appropriate analysis | Item 9: Adequate response rate | Overall Risk of Bias† |
|-------------------------------------|-------------------------|-----------------------------------|-------------------------------------|------------------------------|--------------------------------------|---------------------------------|---------------------------------|-------------------------------------|------------------------------|--------------------------------|-----------------------|
| Hynes                               | 2020-06-10              | Yes                               | Yes                                 | No                           | No                                   | Unclear                         | Unclear                         | Yes                                 | No                           | No                             | High                  |
| Harden                              | 2020-06-10              | No                                | No                                  | Yes                          | No                                   | Unclear                         | Unclear                         | Unclear                             | No                           | Unclear                        | High                  |
| Yogo                                | 2020-06-08              | No                                | No                                  | Yes                          | Yes                                  | Yes                             | Yes                             | Yes                                 | No                           | No                             | High                  |
| Hogan                               | 2020-06-08              | Yes                               | No                                  | Yes                          | Yes                                  | Unclear                         | Unclear                         | Yes                                 | No                           | Yes                            | High                  |
| Rudavsky                            | 2020-06-08              | Yes                               | Yes                                 | Yes                          | No                                   | Yes                             | Unclear                         | Unclear                             | No                           | Unclear                        | Moderate              |
| Barzin                              | 2020-06-04              | Yes                               | No                                  | Yes                          | Yes                                  | Unclear                         | Yes                             | Yes                                 | No                           | Unclear                        | Moderate              |
| Flannery                            | 2020-06-03              | Yes                               | Yes                                 | Yes                          | Yes                                  | Yes                             | Unclear                         | Yes                                 | No                           | Yes                            | Moderate              |
| Coffman                             | 2020-05-31              | Unclear                           | Unclear                             | Yes                          | No                                   | Unclear                         | Unclear                         | Unclear                             | Unclear                      | Unclear                        | Unclear               |
| Addetia                             | 2020-05-31              | No                                | No                                  | No                           | No                                   | No                              | Unclear                         | Yes                                 | No                           | Yes                            | High                  |
| Gray                                | 2020-05-31              | Yes                               | Unclear                             | No                           | No                                   | Unclear                         | Unclear                         | Yes                                 | No                           | Unclear                        | High                  |
| Brunner                             | 2020-05-29              | Yes                               | No                                  | Yes                          | Yes                                  | Yes                             | Yes                             | Yes                                 | No                           | Unclear                        | High                  |
| Brunner                             | 2020-05-29              | Unclear                           | Unclear                             | Yes                          | Yes                                  | Unclear                         | Yes                             | Yes                                 | No                           | Unclear                        | High                  |
| Ohnesorge                           | 2020-05-29              | Yes                               | No                                  | No                           | No                                   | Unclear                         | Unclear                         | Unclear                             | No                           | Unclear                        | Unclear               |
| Sims                                | 2020-05-28              | Yes                               | No                                  | Yes                          | Yes                                  | Unclear                         | Yes                             | Yes                                 | No                           | No                             | Moderate              |
| Hayden                              | 2020-05-28              | Yes                               | No                                  | Yes                          | No                                   | Unclear                         | Unclear                         | Yes                                 | No                           | Unclear                        | Unclear               |
| Liu                                 | 2020-05-26              | No                                | No                                  | Yes                          | No                                   | Unclear                         | Unclear                         | Yes                                 | No                           | Unclear                        | High                  |
| Osher                               | 2020-05-26              | Yes                               | No                                  | No                           | No                                   | Unclear                         | Unclear                         | Yes                                 | No                           | Unclear                        | High                  |
| Mukherjee                           | 2020-05-26              | Yes                               | No                                  | Yes                          | No                                   | Unclear                         | Unclear                         | Unclear                             | No                           | Unclear                        | High                  |
| Stavert                             | 2020-05-24              | No                                | No                                  | No                           | Yes                                  | Unclear                         | Unclear                         | Yes                                 | No                           | Unclear                        | High                  |
| Ahmad                               | 2020-05-22              | No                                | Unclear                             | No                           | Yes                                  | Unclear                         | Yes                             | Yes                                 | No                           | Unclear                        | High                  |
| Jackson                             | 2020-05-22              | Yes                               | Yes                                 | Yes                          | No                                   | Unclear                         | Unclear                         | Unclear                             | Unclear                      | Unclear                        | Unclear               |

| Article Author (Study Organization) | Sampling End Date (YMD) | Item 1: Appropriate sample frame* | Item 2: Probability sampling method | Item 3: Adequate sample size | Item 4: Subjects & setting described | Item 5: Good coverage of sample | Item 6: Sens > 90% & spec > 95% | Item 7: Same tests for all subjects | Item 8: Appropriate analysis | Item 9: Adequate response rate | Overall Risk of Bias† |
|-------------------------------------|-------------------------|-----------------------------------|-------------------------------------|------------------------------|--------------------------------------|---------------------------------|---------------------------------|-------------------------------------|------------------------------|--------------------------------|-----------------------|
| Jackson                             | 2020-05-22              | Yes                               | Yes                                 | Yes                          | No                                   | Unclear                         | Unclear                         | Unclear                             | Unclear                      | Unclear                        | Unclear               |
| Jackson                             | 2020-05-22              | Yes                               | Yes                                 | No                           | No                                   | Unclear                         | Unclear                         | Unclear                             | Unclear                      | Unclear                        | Unclear               |
| Jackson                             | 2020-05-22              | Yes                               | Yes                                 | Yes                          | No                                   | Unclear                         | Unclear                         | Unclear                             | Unclear                      | Unclear                        | Unclear               |
| Staletovich                         | 2020-05-22              | Yes                               | Unclear                             | Yes                          | No                                   | Unclear                         | Unclear                         | Unclear                             | No                           | Unclear                        | Unclear               |
| Leidner                             | 2020-05-22              | Yes                               | No                                  | Yes                          | Yes                                  | Yes                             | No                              | Yes                                 | No                           | Unclear                        | High                  |
| Pritchett                           | 2020-05-21              | No                                | Unclear                             | No                           | Yes                                  | Unclear                         | Unclear                         | Yes                                 | No                           | Unclear                        | High                  |
| Shukla                              | 2020-05-21              | Yes                               | No                                  | Yes                          | Yes                                  | Unclear                         | Yes                             | Yes                                 | No                           | Unclear                        | Moderate              |
| Rosser                              | 2020-05-20              | Yes                               | No                                  | Yes                          | Yes                                  | Yes                             | No                              | Yes                                 | No                           | Unclear                        | High                  |
| Alfini                              | 2020-05-20              | Yes                               | No                                  | No                           | No                                   | Unclear                         | Unclear                         | Unclear                             | No                           | Unclear                        | Unclear               |
| Alfini                              | 2020-05-20              | Yes                               | No                                  | Yes                          | No                                   | Unclear                         | Unclear                         | Unclear                             | No                           | Unclear                        | Unclear               |
| Montgomery                          | 2020-05-20              | No                                | No                                  | Yes                          | No                                   | Unclear                         | Unclear                         | No                                  | No                           | Unclear                        | High                  |
| Geraci                              | 2020-05-20              | No                                | Unclear                             | No                           | No                                   | Unclear                         | Unclear                         | Yes                                 | No                           | Unclear                        | High                  |
| Tarabichi                           | 2020-05-19              | Yes                               | No                                  | No                           | Yes                                  | Yes                             | Unclear                         | Yes                                 | No                           | Yes                            | High                  |
| Mughal                              | 2020-05-19              | No                                | No                                  | No                           | Yes                                  | Unclear                         | Yes                             | Yes                                 | No                           | Yes                            | High                  |
| McLaughlin                          | 2020-05-19              | Yes                               | No                                  | Yes                          | Yes                                  | Yes                             | Yes                             | Yes                                 | Yes                          | Yes                            | Moderate              |
| Morris                              | 2020-05-18              | Yes                               | Unclear                             | No                           | No                                   | Unclear                         | Unclear                         | Unclear                             | No                           | Unclear                        | Unclear               |
| Feehan                              | 2020-05-15              | Yes                               | Yes                                 | Yes                          | Yes                                  | Unclear                         | Unclear                         | Yes                                 | No                           | Unclear                        | Moderate              |
| Meyer                               | 2020-05-15              | Yes                               | No                                  | Yes                          | No                                   | Unclear                         | Unclear                         | Unclear                             | No                           | Unclear                        | High                  |
| Dietrich                            | 2020-05-15              | No                                | No                                  | Yes                          | Yes                                  | Yes                             | Unclear                         | Yes                                 | No                           | Unclear                        | High                  |
| City of Boston                      | 2020-05-15              | Yes                               | Yes                                 | Yes                          | Yes                                  | Yes                             | Unclear                         | Yes                                 | Unclear                      | No                             | Moderate              |
| Parker-Magyar                       | 2020-05-14              | Yes                               | No                                  | No                           | No                                   | Unclear                         | Unclear                         | Unclear                             | No                           | Unclear                        | High                  |

| Article Author<br>(Study Organization) | Sampling End<br>Date<br>(YMD) | Item 1:<br>Appropriate<br>sample frame* | Item 2:<br>Probability<br>sampling<br>method | Item 3:<br>Adequate<br>sample size | Item 4:<br>Subjects &<br>setting<br>described | Item 5: Good<br>coverage of<br>sample | Item 6: Sens ><br>90% & spec ><br>95% | Item 7: Same<br>tests for all<br>subjects | Item 8:<br>Appropriate<br>analysis | Item 9:<br>Adequate<br>response rate | Overall Risk of<br>Bias† |
|----------------------------------------|-------------------------------|-----------------------------------------|----------------------------------------------|------------------------------------|-----------------------------------------------|---------------------------------------|---------------------------------------|-------------------------------------------|------------------------------------|--------------------------------------|--------------------------|
| Iwuji                                  | 2020-05-13                    | Yes                                     | No                                           | Yes                                | No                                            | Unclear                               | Yes                                   | Yes                                       | No                                 | Unclear                              | High                     |
| CBS Los Angeles                        | 2020-05-12                    | Yes                                     | Unclear                                      | Yes                                | No                                            | Unclear                               | Unclear                               | Unclear                                   | No                                 | Unclear                              | Unclear                  |
| Nesbitt                                | 2020-05-11                    | No                                      | No                                           | Yes                                | Yes                                           | Unclear                               | Yes                                   | Yes                                       | No                                 | Unclear                              | Moderate                 |
| Tilley                                 | 2020-05-08                    | Yes                                     | No                                           | Yes                                | Yes                                           | Unclear                               | Yes                                   | Yes                                       | Yes                                | Unclear                              | Moderate                 |
| Hunter                                 | 2020-05-08                    | Yes                                     | No                                           | Yes                                | Yes                                           | No                                    | Yes                                   | Yes                                       | No                                 | Unclear                              | High                     |
| Ripperger                              | 2020-05-07                    | Yes                                     | No                                           | Yes                                | Yes                                           | Unclear                               | Yes                                   | Yes                                       | No                                 | Unclear                              | High                     |
| Racine-Brzostek                        | 2020-05-07                    | Yes                                     | No                                           | Yes                                | Yes                                           | Yes                                   | Unclear                               | Yes                                       | No                                 | Unclear                              | Moderate                 |
| Regan                                  | 2020-05-06                    | Yes                                     | Unclear                                      | No                                 | No                                            | Unclear                               | Unclear                               | Unclear                                   | No                                 | Unclear                              | Unclear                  |
| Regan                                  | 2020-05-06                    | No                                      | Unclear                                      | No                                 | No                                            | Unclear                               | Unclear                               | Unclear                                   | No                                 | Unclear                              | Unclear                  |
| Sydney                                 | 2020-05-04                    | Yes                                     | No                                           | Yes                                | Yes                                           | Unclear                               | Unclear                               | Unclear                                   | No                                 | No                                   | High                     |
| Bajema                                 | 2020-05-03                    | Yes                                     | Yes                                          | Yes                                | Yes                                           | Yes                                   | Unclear                               | Yes                                       | Yes                                | Yes                                  | Low                      |
| Biggs                                  | 2020-05-03                    | Yes                                     | Yes                                          | Yes                                | Yes                                           | Yes                                   | Yes                                   | Yes                                       | No                                 | Unclear                              | Moderate                 |
| Menachemi                              | 2020-05-03                    | Yes                                     | No                                           | No                                 | Yes                                           | Yes                                   | Yes                                   | Yes                                       | No                                 | Unclear                              | High                     |
| Reagan                                 | 2020-05-02                    | No                                      | Unclear                                      | Yes                                | No                                            | Unclear                               | Yes                                   | Yes                                       | No                                 | Unclear                              | High                     |
| Venugopal                              | 2020-05-01                    | Yes                                     | No                                           | No                                 | Yes                                           | Yes                                   | Yes                                   | Yes                                       | No                                 | Yes                                  | Moderate                 |
| Bajema                                 | 2020-05-01                    | No                                      | No                                           | Yes                                | Yes                                           | Unclear                               | Yes                                   | Yes                                       | Yes                                | Unclear                              | Moderate                 |
| Jeremias                               | 2020-04-30                    | No                                      | No                                           | Yes                                | Yes                                           | Yes                                   | Unclear                               | No                                        | No                                 | No                                   | High                     |
| Cohen                                  | 2020-04-30                    | Yes                                     | No                                           | Yes                                | Yes                                           | Unclear                               | No                                    | Yes                                       | No                                 | Unclear                              | High                     |
| Jeong                                  | 2020-04-30                    | No                                      | No                                           | No                                 | Yes                                           | Unclear                               | Unclear                               | Yes                                       | No                                 | Yes                                  | High                     |
| Menachemi                              | 2020-04-29                    | Yes                                     | Yes                                          | Yes                                | Yes                                           | No                                    | Yes                                   | Yes                                       | No                                 | No                                   | Moderate                 |
| Chamie                                 | 2020-04-28                    | Yes                                     | No                                           | Yes                                | Yes                                           | Unclear                               | Yes                                   | Yes                                       | Yes                                | Unclear                              | Moderate                 |

| Article Author<br>(Study Organization) | Sampling End<br>Date<br>(YMD) | Item 1:<br>Appropriate<br>sample frame* | Item 2:<br>Probability<br>sampling<br>method | Item 3:<br>Adequate<br>sample size | Item 4:<br>Subjects &<br>setting<br>described | Item 5: Good<br>coverage of<br>sample | Item 6: Sens ><br>90% & spec ><br>95% | Item 7: Same<br>tests for all<br>subjects | Item 8:<br>Appropriate<br>analysis | Item 9:<br>Adequate<br>response rate | Overall Risk of<br>Bias† |
|----------------------------------------|-------------------------------|-----------------------------------------|----------------------------------------------|------------------------------------|-----------------------------------------------|---------------------------------------|---------------------------------------|-------------------------------------------|------------------------------------|--------------------------------------|--------------------------|
| Rosenberg                              | 2020-04-28                    | Yes                                     | No                                           | Yes                                | Yes                                           | Yes                                   | Yes                                   | Yes                                       | Yes                                | Yes                                  | Moderate                 |
| Zou                                    | 2020-04-27                    | No                                      | No                                           | No                                 | No                                            | Unclear                               | Unclear                               | Yes                                       | No                                 | Unclear                              | High                     |
| Bryan                                  | 2020-04-26                    | Yes                                     | No                                           | Yes                                | Yes                                           | Unclear                               | Yes                                   | Yes                                       | No                                 | Unclear                              | High                     |
| Lewis                                  | 2020-04-25                    | Yes                                     | No                                           | No                                 | Yes                                           | Yes                                   | Unclear                               | Yes                                       | No                                 | Yes                                  | High                     |
| Appa                                   | 2020-04-24                    | Yes                                     | No                                           | Yes                                | Yes                                           | No                                    | Yes                                   | Yes                                       | No                                 | Yes                                  | Moderate                 |
| Payne                                  | 2020-04-24                    | No                                      | No                                           | No                                 | No                                            | Unclear                               | Unclear                               | Yes                                       | No                                 | No                                   | High                     |
| Sassoon                                | 2020-04-24                    | Yes                                     | No                                           | Yes                                | No                                            | Unclear                               | Yes                                   | Yes                                       | No                                 | Unclear                              | High                     |
| Dingens                                | 2020-04-24                    | No                                      | No                                           | Yes                                | Yes                                           | Unclear                               | Unclear                               | Yes                                       | No                                 | Unclear                              | High                     |
| Kiefer                                 | 2020-04-23                    | No                                      | No                                           | No                                 | Yes                                           | No                                    | Unclear                               | Yes                                       | No                                 | No                                   | High                     |
| Morrison                               | 2020-04-22                    | No                                      | No                                           | Yes                                | No                                            | Unclear                               | Yes                                   | Yes                                       | No                                 | Unclear                              | High                     |
| Morcuende                              | 2020-04-21                    | No                                      | No                                           | No                                 | Yes                                           | No                                    | Yes                                   | Yes                                       | No                                 | No                                   | High                     |
| McCormack                              | 2020-04-21                    | Yes                                     | Unclear                                      | Yes                                | No                                            | Unclear                               | Unclear                               | Unclear                                   | No                                 | Unclear                              | Unclear                  |
| Paterson                               | 2020-04-21                    | No                                      | Unclear                                      | No                                 | No                                            | Unclear                               | Unclear                               | Yes                                       | Unclear                            | Unclear                              | Unclear                  |
| Stock                                  | 2020-04-20                    | No                                      | No                                           | No                                 | Yes                                           | No                                    | Unclear                               | Yes                                       | No                                 | Unclear                              | High                     |
| Madsen                                 | 2020-04-19                    | No                                      | No                                           | No                                 | No                                            | Unclear                               | Yes                                   | Yes                                       | No                                 | Yes                                  | High                     |
| Caban-Martinez                         | 2020-04-17                    | No                                      | No                                           | No                                 | Yes                                           | Yes                                   | No                                    | Yes                                       | No                                 | Unclear                              | High                     |
| Naranbhai                              | 2020-04-15                    | Yes                                     | No                                           | No                                 | Yes                                           | Unclear                               | Yes                                   | Yes                                       | Yes                                | Unclear                              | Moderate                 |
| Sood                                   | 2020-04-14                    | Yes                                     | Yes                                          | Yes                                | Yes                                           | Yes                                   | No                                    | Yes                                       | Yes                                | No                                   | Moderate                 |
| Ng                                     | 2020-04-13                    | No                                      | Yes                                          | No                                 | Yes                                           | Yes                                   | Yes                                   | Yes                                       | No                                 | Unclear                              | High                     |
| Goldberg                               | 2020-04-06                    | Yes                                     | No                                           | No                                 | Yes                                           | Yes                                   | Yes                                   | Yes                                       | No                                 | Yes                                  | High                     |
| Bendavid                               | 2020-04-04                    | No                                      | No                                           | Yes                                | Yes                                           | No                                    | No                                    | Yes                                       | Yes                                | Unclear                              | High                     |

| Article Author<br>(Study Organization) | Sampling End<br>Date<br>(YMD) | Item 1:<br>Appropriate<br>sample frame* | Item 2:<br>Probability<br>sampling<br>method | Item 3:<br>Adequate<br>sample size | Item 4:<br>Subjects &<br>setting<br>described | Item 5: Good<br>coverage of<br>sample | Item 6: Sens ><br>90% & spec ><br>95% | Item 7: Same<br>tests for all<br>subjects | Item 8:<br>Appropriate<br>analysis | Item 9:<br>Adequate<br>response rate | Overall Risk of<br>Bias† |
|----------------------------------------|-------------------------------|-----------------------------------------|----------------------------------------------|------------------------------------|-----------------------------------------------|---------------------------------------|---------------------------------------|-------------------------------------------|------------------------------------|--------------------------------------|--------------------------|
| Mansour                                | 2020-04-04                    | Yes                                     | No                                           | No                                 | Yes                                           | Yes                                   | Unclear                               | Yes                                       | No                                 | Unclear                              | High                     |
| Ng                                     | 2020-03-31                    | No                                      | No                                           | Yes                                | Yes                                           | Yes                                   | Yes                                   | Yes                                       | No                                 | Unclear                              | Moderate                 |
| Schuchat                               | 2020-03-31                    | No                                      | No                                           | No                                 | No                                            | Unclear                               | Unclear                               | Unclear                                   | No                                 | Unclear                              | High                     |
| McPherson                              | 2020-03-06                    | Yes                                     | No                                           | No                                 | Yes                                           | Yes                                   | Yes                                   | Yes                                       | No                                 | No                                   | High                     |
| Chu                                    | 2020-02-03                    | Yes                                     | No                                           | No                                 | No                                            | Unclear                               | Yes                                   | Yes                                       | No                                 | Yes                                  | High                     |
| Basavaraju                             | 2020-01-17                    | No                                      | No                                           | Yes                                | Yes                                           | No                                    | Yes                                   | Yes                                       | No                                 | Unclear                              | Moderate                 |
| <b>Latin America and Caribbean</b>     |                               |                                         |                                              |                                    |                                               |                                       |                                       |                                           |                                    |                                      |                          |
| <b>Brazil</b>                          |                               |                                         |                                              |                                    |                                               |                                       |                                       |                                           |                                    |                                      |                          |
| Buss                                   | 2020-10-24                    | No                                      | No                                           | Yes                                | No                                            | Yes                                   | Yes                                   | Yes                                       | Yes                                | Unclear                              | Moderate                 |
| Buss                                   | 2020-10-17                    | No                                      | No                                           | Yes                                | No                                            | Yes                                   | Yes                                   | Yes                                       | Yes                                | Unclear                              | Moderate                 |
| Buss                                   | 2020-09-29                    | No                                      | No                                           | Yes                                | No                                            | Yes                                   | Yes                                   | Yes                                       | Yes                                | Unclear                              | Moderate                 |
| Buss                                   | 2020-09-14                    | No                                      | No                                           | Yes                                | No                                            | Yes                                   | Yes                                   | Yes                                       | Yes                                | Unclear                              | Moderate                 |
| Buss                                   | 2020-08-29                    | No                                      | No                                           | Yes                                | No                                            | Yes                                   | Yes                                   | Yes                                       | Yes                                | Unclear                              | Moderate                 |
| Buss                                   | 2020-08-19                    | No                                      | No                                           | Yes                                | No                                            | Yes                                   | Yes                                   | Yes                                       | Yes                                | Unclear                              | Moderate                 |
| Santana                                | 2020-08-15                    | Yes                                     | No                                           | No                                 | Yes                                           | Unclear                               | Unclear                               | Yes                                       | No                                 | Unclear                              | High                     |
| daSilva                                | 2020-08-08                    | Yes                                     | Yes                                          | Yes                                | Yes                                           | Yes                                   | Yes                                   | Yes                                       | No                                 | Yes                                  | Moderate                 |
| Oliveira                               | 2020-08-04                    | No                                      | No                                           | No                                 | Yes                                           | Unclear                               | Yes                                   | Yes                                       | No                                 | Unclear                              | High                     |
| Buss                                   | 2020-07-31                    | No                                      | Unclear                                      | Yes                                | No                                            | Unclear                               | Unclear                               | Yes                                       | No                                 | Unclear                              | Unclear                  |
| Silva                                  | 2020-07-31                    | No                                      | No                                           | No                                 | Yes                                           | Unclear                               | Unclear                               | Unclear                                   | No                                 | Unclear                              | High                     |
| Paula                                  | 2020-07-31                    | No                                      | No                                           | Yes                                | Yes                                           | Unclear                               | Unclear                               | Yes                                       | No                                 | Yes                                  | High                     |
| Buss                                   | 2020-07-25                    | No                                      | No                                           | Yes                                | No                                            | Yes                                   | Yes                                   | Yes                                       | Yes                                | Unclear                              | Moderate                 |

| Article Author<br>(Study Organization) | Sampling End<br>Date<br>(YMD) | Item 1:<br>Appropriate<br>sample frame* | Item 2:<br>Probability<br>sampling<br>method | Item 3:<br>Adequate<br>sample size | Item 4:<br>Subjects &<br>setting<br>described | Item 5: Good<br>coverage of<br>sample | Item 6: Sens ><br>90% & spec ><br>95% | Item 7: Same<br>tests for all<br>subjects | Item 8:<br>Appropriate<br>analysis | Item 9:<br>Adequate<br>response rate | Overall Risk of<br>Bias† |
|----------------------------------------|-------------------------------|-----------------------------------------|----------------------------------------------|------------------------------------|-----------------------------------------------|---------------------------------------|---------------------------------------|-------------------------------------------|------------------------------------|--------------------------------------|--------------------------|
| Buss                                   | 2020-07-15                    | No                                      | No                                           | Yes                                | No                                            | Yes                                   | Yes                                   | Yes                                       | Yes                                | Unclear                              | Moderate                 |
| Melo                                   | 2020-06-30                    | Yes                                     | No                                           | No                                 | No                                            | Unclear                               | Yes                                   | Yes                                       | No                                 | Unclear                              | High                     |
| Horta                                  | 2020-06-24                    | Yes                                     | Yes                                          | Yes                                | Yes                                           | No                                    | No                                    | Yes                                       | No                                 | Yes                                  | Moderate                 |
| Buss                                   | 2020-06-20                    | No                                      | No                                           | Yes                                | No                                            | Yes                                   | Yes                                   | Yes                                       | Yes                                | Unclear                              | Moderate                 |
| Picon                                  | 2020-06-17                    | Yes                                     | Yes                                          | Yes                                | Yes                                           | Yes                                   | No                                    | Yes                                       | Yes                                | Yes                                  | Moderate                 |
| Buss                                   | 2020-06-15                    | No                                      | No                                           | Yes                                | No                                            | Yes                                   | Yes                                   | Yes                                       | Yes                                | Unclear                              | Moderate                 |
| Picon                                  | 2020-06-04                    | Yes                                     | Yes                                          | Yes                                | Yes                                           | Yes                                   | No                                    | Yes                                       | Yes                                | Yes                                  | Moderate                 |
| Vieira                                 | 2020-05-31                    | Yes                                     | Yes                                          | Yes                                | No                                            | Unclear                               | No                                    | Yes                                       | No                                 | Unclear                              | Moderate                 |
| Sales                                  | 2020-05-31                    | Yes                                     | Yes                                          | Yes                                | Yes                                           | Yes                                   | Unclear                               | Yes                                       | No                                 | Unclear                              | Moderate                 |
| Jr                                     | 2020-05-30                    | Unclear                                 | Unclear                                      | No                                 | Yes                                           | Yes                                   | Unclear                               | Unclear                                   | Unclear                            | Unclear                              | Unclear                  |
| Costa                                  | 2020-05-28                    | Yes                                     | No                                           | Yes                                | Yes                                           | Unclear                               | Unclear                               | Yes                                       | No                                 | Yes                                  | Moderate                 |
| Vieira                                 | 2020-05-24                    | Yes                                     | Yes                                          | Yes                                | No                                            | Unclear                               | No                                    | Yes                                       | No                                 | Unclear                              | Moderate                 |
| Buss                                   | 2020-05-21                    | No                                      | No                                           | Yes                                | No                                            | Yes                                   | Yes                                   | Yes                                       | Yes                                | Unclear                              | Moderate                 |
| Vieira                                 | 2020-05-17                    | Yes                                     | Yes                                          | Yes                                | No                                            | Unclear                               | No                                    | Yes                                       | No                                 | Unclear                              | Moderate                 |
| Chioro                                 | 2020-05-15                    | Yes                                     | Yes                                          | Yes                                | Yes                                           | Unclear                               | Unclear                               | Yes                                       | No                                 | Unclear                              | High                     |
| Gomes                                  | 2020-05-15                    | Yes                                     | Yes                                          | Yes                                | Yes                                           | Yes                                   | No                                    | Yes                                       | No                                 | Unclear                              | Moderate                 |
| Gomes                                  | 2020-05-15                    | Yes                                     | Yes                                          | Yes                                | Yes                                           | Yes                                   | No                                    | Yes                                       | No                                 | Unclear                              | Moderate                 |
| Buss                                   | 2020-05-14                    | No                                      | No                                           | Yes                                | No                                            | Yes                                   | Yes                                   | Yes                                       | Yes                                | Unclear                              | Moderate                 |
| Tess                                   | 2020-05-12                    | Yes                                     | Yes                                          | No                                 | Yes                                           | Yes                                   | Yes                                   | Yes                                       | No                                 | No                                   | Moderate                 |
| Watanabe                               | 2020-05-12                    | Yes                                     | Yes                                          | No                                 | No                                            | Unclear                               | Unclear                               | Unclear                                   | No                                 | Unclear                              | Unclear                  |
| Silveira                               | 2020-05-11                    | Yes                                     | Yes                                          | Yes                                | Yes                                           | Yes                                   | No                                    | Yes                                       | Yes                                | Yes                                  | Low                      |

| Article Author<br>(Study Organization) | Sampling End<br>Date<br>(YMD) | Item 1:<br>Appropriate<br>sample frame* | Item 2:<br>Probability<br>sampling<br>method | Item 3:<br>Adequate<br>sample size | Item 4:<br>Subjects &<br>setting<br>described | Item 5: Good<br>coverage of<br>sample | Item 6: Sens ><br>90% & spec ><br>95% | Item 7: Same<br>tests for all<br>subjects | Item 8:<br>Appropriate<br>analysis | Item 9:<br>Adequate<br>response rate | Overall Risk of<br>Bias† |
|----------------------------------------|-------------------------------|-----------------------------------------|----------------------------------------------|------------------------------------|-----------------------------------------------|---------------------------------------|---------------------------------------|-------------------------------------------|------------------------------------|--------------------------------------|--------------------------|
| Vieira                                 | 2020-05-10                    | Yes                                     | Yes                                          | Yes                                | No                                            | Unclear                               | No                                    | Yes                                       | No                                 | Unclear                              | Moderate                 |
| Borges                                 | 2020-05-09                    | No                                      | No                                           | Yes                                | Yes                                           | Yes                                   | Yes                                   | Yes                                       | No                                 | Unclear                              | High                     |
| Vieira                                 | 2020-05-03                    | Yes                                     | Yes                                          | Yes                                | No                                            | Unclear                               | No                                    | Yes                                       | No                                 | Unclear                              | Moderate                 |
| Buss                                   | 2020-04-30                    | No                                      | No                                           | Yes                                | No                                            | Yes                                   | Yes                                   | Yes                                       | Yes                                | Unclear                              | Moderate                 |
| Silva                                  | 2020-04-29                    | Yes                                     | Unclear                                      | No                                 | No                                            | Unclear                               | Unclear                               | Yes                                       | No                                 | Unclear                              | High                     |
| Silveira                               | 2020-04-27                    | Yes                                     | Yes                                          | Yes                                | Yes                                           | Yes                                   | No                                    | Yes                                       | Yes                                | Yes                                  | Low                      |
| Filho                                  | 2020-04-27                    | No                                      | No                                           | Yes                                | Yes                                           | Unclear                               | No                                    | Yes                                       | Yes                                | Yes                                  | Moderate                 |
| Vieira                                 | 2020-04-26                    | Yes                                     | Yes                                          | Yes                                | No                                            | Unclear                               | No                                    | Yes                                       | No                                 | Unclear                              | Moderate                 |
| Vieira                                 | 2020-04-19                    | Yes                                     | Yes                                          | Yes                                | No                                            | Unclear                               | No                                    | Yes                                       | No                                 | Unclear                              | Moderate                 |
| Buss                                   | 2020-04-17                    | No                                      | No                                           | Yes                                | No                                            | Yes                                   | Yes                                   | Yes                                       | Yes                                | Unclear                              | Moderate                 |
| Gurgel                                 | 2020-04-15                    | No                                      | No                                           | Yes                                | Yes                                           | Unclear                               | Yes                                   | Yes                                       | No                                 | Unclear                              | Moderate                 |
| Silveira                               | 2020-04-13                    | Yes                                     | Yes                                          | Yes                                | Yes                                           | Yes                                   | No                                    | Yes                                       | Yes                                | Yes                                  | Low                      |
| Buss                                   | 2020-03-21                    | No                                      | No                                           | Yes                                | No                                            | Yes                                   | Yes                                   | Yes                                       | Yes                                | Unclear                              | Moderate                 |
| Buss                                   | 2020-03-12                    | No                                      | No                                           | Yes                                | No                                            | Yes                                   | Yes                                   | Yes                                       | Yes                                | Unclear                              | Moderate                 |
| Buss                                   | 2020-02-29                    | No                                      | No                                           | Yes                                | No                                            | Yes                                   | Yes                                   | Yes                                       | Yes                                | Unclear                              | Moderate                 |
| Buss                                   | 2020-02-13                    | No                                      | No                                           | Yes                                | No                                            | Yes                                   | Yes                                   | Yes                                       | Yes                                | Unclear                              | Moderate                 |
| <b>Columbia</b>                        |                               |                                         |                                              |                                    |                                               |                                       |                                       |                                           |                                    |                                      |                          |
| Mattar                                 | 2020-09-01                    | Yes                                     | Yes                                          | Yes                                | No                                            | Unclear                               | Yes                                   | Yes                                       | No                                 | Unclear                              | Moderate                 |
| Ariza                                  | 2020-08-10                    | Yes                                     | No                                           | No                                 | Yes                                           | Unclear                               | Yes                                   | Yes                                       | No                                 | No                                   | High                     |
| Idrovo                                 | 2020-07-14                    | No                                      | No                                           | Yes                                | No                                            | No                                    | Unclear                               | Unclear                                   | No                                 | No                                   | High                     |
| <b>Cuba</b>                            |                               |                                         |                                              |                                    |                                               |                                       |                                       |                                           |                                    |                                      |                          |



| Article Author<br>(Study Organization) | Sampling End<br>Date<br>(YMD) | Item 1:<br>Appropriate<br>sample frame* | Item 2:<br>Probability<br>sampling<br>method | Item 3:<br>Adequate<br>sample size | Item 4:<br>Subjects &<br>setting<br>described | Item 5: Good<br>coverage of<br>sample | Item 6: Sens ><br>90% & spec ><br>95% | Item 7: Same<br>tests for all<br>subjects | Item 8:<br>Appropriate<br>analysis | Item 9:<br>Adequate<br>response rate | Overall Risk of<br>Bias† |
|----------------------------------------|-------------------------------|-----------------------------------------|----------------------------------------------|------------------------------------|-----------------------------------------------|---------------------------------------|---------------------------------------|-------------------------------------------|------------------------------------|--------------------------------------|--------------------------|
| Giraldoni                              | 2020-04-06                    | No                                      | No                                           | No                                 | Yes                                           | Unclear                               | Unclear                               | Unclear                                   | No                                 | Unclear                              | Unclear                  |
| <b>Dominican Republic</b>              |                               |                                         |                                              |                                    |                                               |                                       |                                       |                                           |                                    |                                      |                          |
| Paulino-Ramirez                        | 2020-06-15                    | No                                      | Yes                                          | Yes                                | Yes                                           | Unclear                               | No                                    | Yes                                       | No                                 | Unclear                              | High                     |
| <b>Ecuador</b>                         |                               |                                         |                                              |                                    |                                               |                                       |                                       |                                           |                                    |                                      |                          |
| Brutto                                 | 2020-06-30                    | No                                      | Yes                                          | No                                 | Yes                                           | Yes                                   | Yes                                   | Yes                                       | No                                 | Yes                                  | High                     |
| Brutto                                 | 2020-05-25                    | Yes                                     | No                                           | Yes                                | Yes                                           | Yes                                   | Yes                                   | Yes                                       | No                                 | Yes                                  | Moderate                 |
| <b>French Guiana</b>                   |                               |                                         |                                              |                                    |                                               |                                       |                                       |                                           |                                    |                                      |                          |
| Flamand                                | 2020-07-23                    | No                                      | No                                           | No                                 | Yes                                           | Yes                                   | Yes                                   | Yes                                       | No                                 | Unclear                              | Moderate                 |
| <b>Honduras</b>                        |                               |                                         |                                              |                                    |                                               |                                       |                                       |                                           |                                    |                                      |                          |
| Nunez                                  | 2020-06-23                    | Yes                                     | Yes                                          | Yes                                | Yes                                           | Yes                                   | Yes                                   | Yes                                       | No                                 | Unclear                              | Moderate                 |
| <b>Mexico</b>                          |                               |                                         |                                              |                                    |                                               |                                       |                                       |                                           |                                    |                                      |                          |
| Cruz-Arenas                            | 2020-09-09                    | Yes                                     | Yes                                          | No                                 | Yes                                           | Yes                                   | Unclear                               | Yes                                       | No                                 | Unclear                              | Moderate                 |
| Martinez-Acuna                         | 2020-08-30                    | No                                      | No                                           | Yes                                | Yes                                           | Yes                                   | Unclear                               | Yes                                       | No                                 | Unclear                              | High                     |
| Remes-Troche                           | 2020-07-31                    | No                                      | Yes                                          | Yes                                | Yes                                           | Unclear                               | Unclear                               | Yes                                       | No                                 | Unclear                              | High                     |
| Diaz-Salazar                           | 2020-07-23                    | Yes                                     | Yes                                          | Yes                                | Yes                                           | Yes                                   | Yes                                   | Yes                                       | No                                 | Yes                                  | Moderate                 |
| <b>Panama</b>                          |                               |                                         |                                              |                                    |                                               |                                       |                                       |                                           |                                    |                                      |                          |
| Villarreal                             | 2020-07-07                    | No                                      | No                                           | No                                 | Yes                                           | Unclear                               | No                                    | Yes                                       | No                                 | Unclear                              | High                     |
| Villarreal                             | 2020-07-07                    | No                                      | No                                           | No                                 | Yes                                           | No                                    | No                                    | Yes                                       | No                                 | Unclear                              | High                     |
| <b>Paraguay</b>                        |                               |                                         |                                              |                                    |                                               |                                       |                                       |                                           |                                    |                                      |                          |
| Ultimahora                             | 2020-12-15                    | Yes                                     | Unclear                                      | Yes                                | No                                            | No                                    | Unclear                               | Unclear                                   | Unclear                            | Yes                                  | Unclear                  |
| <b>Peru</b>                            |                               |                                         |                                              |                                    |                                               |                                       |                                       |                                           |                                    |                                      |                          |

| Article Author (Study Organization) | Sampling End Date (YMD) | Item 1: Appropriate sample frame* | Item 2: Probability sampling method | Item 3: Adequate sample size | Item 4: Subjects & setting described | Item 5: Good coverage of sample | Item 6: Sens > 90% & spec > 95% | Item 7: Same tests for all subjects | Item 8: Appropriate analysis | Item 9: Adequate response rate | Overall Risk of Bias <sup>†</sup> |
|-------------------------------------|-------------------------|-----------------------------------|-------------------------------------|------------------------------|--------------------------------------|---------------------------------|---------------------------------|-------------------------------------|------------------------------|--------------------------------|-----------------------------------|
| Alvarex-Antonio                     | 2020-08-15              | Yes                               | Yes                                 | Yes                          | Yes                                  | Yes                             | Yes                             | Yes                                 | Yes                          | Yes                            | Low                               |
| Peruvian Government                 | 2020-07-09              | Yes                               | Yes                                 | Yes                          | No                                   | Unclear                         | No                              | Yes                                 | No                           | Unclear                        | High                              |
| Angulo-Bazan                        | 2020-05-02              | Yes                               | No                                  | No                           | Yes                                  | Unclear                         | Yes                             | Yes                                 | No                           | Unclear                        | Moderate                          |
| <b>North Africa and Middle East</b> |                         |                                   |                                     |                              |                                      |                                 |                                 |                                     |                              |                                |                                   |
| <b>Egypt</b>                        |                         |                                   |                                     |                              |                                      |                                 |                                 |                                     |                              |                                |                                   |
| Kassem                              | 2020-06-14              | No                                | No                                  | No                           | Yes                                  | Unclear                         | Yes                             | Yes                                 | No                           | No                             | High                              |
| Mostafa                             | 2020-05-14              | Yes                               | No                                  | Yes                          | Yes                                  | Yes                             | No                              | Yes                                 | No                           | Unclear                        | High                              |
| <b>Iran</b>                         |                         |                                   |                                     |                              |                                      |                                 |                                 |                                     |                              |                                |                                   |
| Poustchi                            | 2020-06-02              | Yes                               | Yes                                 | Yes                          | Yes                                  | Yes                             | No                              | Yes                                 | Yes                          | Yes                            | Low                               |
| Poustchi                            | 2020-06-02              | Yes                               | Yes                                 | Yes                          | No                                   | Unclear                         | No                              | Yes                                 | Yes                          | Yes                            | Moderate                          |
| Saberian                            | 2020-05-20              | Yes                               | No                                  | No                           | Yes                                  | Unclear                         | No                              | Yes                                 | No                           | Unclear                        | High                              |
| Armin                               | 2020-05-05              | Yes                               | No                                  | No                           | Yes                                  | Unclear                         | Yes                             | Yes                                 | No                           | Unclear                        | High                              |
| Vazirinejad                         | 2020-04-30              | Yes                               | No                                  | No                           | No                                   | Unclear                         | Unclear                         | Yes                                 | No                           | No                             | High                              |
| Shakiba                             | 2020-04-19              | Yes                               | Yes                                 | No                           | Yes                                  | Unclear                         | No                              | Yes                                 | Yes                          | No                             | Moderate                          |
| Ossareh                             | 2020-03-20              | No                                | Unclear                             | No                           | Yes                                  | Unclear                         | Unclear                         | Yes                                 | No                           | Unclear                        | High                              |
| <b>Kuwait</b>                       |                         |                                   |                                     |                              |                                      |                                 |                                 |                                     |                              |                                |                                   |
| Alali                               | 2020-06-26              | No                                | Yes                                 | No                           | Yes                                  | Unclear                         | No                              | Yes                                 | No                           | Unclear                        | High                              |
| <b>Libya</b>                        |                         |                                   |                                     |                              |                                      |                                 |                                 |                                     |                              |                                |                                   |
| Kammon                              | 2020-05-18              | Yes                               | Yes                                 | No                           | Yes                                  | Yes                             | No                              | Yes                                 | No                           | Yes                            | High                              |
| Kammon                              | 2020-05-18              | No                                | Unclear                             | No                           | Yes                                  | Yes                             | No                              | Yes                                 | No                           | Yes                            | High                              |

| Article Author<br>(Study Organization) | Sampling End<br>Date<br>(YMD) | Item 1:<br>Appropriate<br>sample frame* | Item 2:<br>Probability<br>sampling<br>method | Item 3:<br>Adequate<br>sample size | Item 4:<br>Subjects &<br>setting<br>described | Item 5: Good<br>coverage of<br>sample | Item 6: Sens ><br>90% & spec ><br>95% | Item 7: Same<br>tests for all<br>subjects | Item 8:<br>Appropriate<br>analysis | Item 9:<br>Adequate<br>response rate | Overall Risk of<br>Bias† |
|----------------------------------------|-------------------------------|-----------------------------------------|----------------------------------------------|------------------------------------|-----------------------------------------------|---------------------------------------|---------------------------------------|-------------------------------------------|------------------------------------|--------------------------------------|--------------------------|
| Elfakhri                               | 2020-05-07                    | Yes                                     | Yes                                          | Yes                                | Yes                                           | Yes                                   | No                                    | Yes                                       | No                                 | Unclear                              | Moderate                 |
| <b>Qatar</b>                           |                               |                                         |                                              |                                    |                                               |                                       |                                       |                                           |                                    |                                      |                          |
| Jeremijenko                            | 2020-09-09                    | Yes                                     | No                                           | Yes                                | Yes                                           | Unclear                               | Unclear                               | Yes                                       | No                                 | Unclear                              | High                     |
| MohamedH.AI-Thani                      | 2020-09-09                    | Yes                                     | Yes                                          | Yes                                | Yes                                           | Yes                                   | Yes                                   | Yes                                       | No                                 | Unclear                              | Moderate                 |
| Nasrallah                              | 2020-09-09                    | No                                      | Unclear                                      | No                                 | No                                            | Unclear                               | No                                    | Yes                                       | No                                 | Unclear                              | High                     |
| <b>Saudi Arabia</b>                    |                               |                                         |                                              |                                    |                                               |                                       |                                       |                                           |                                    |                                      |                          |
| Mahallawi                              | 2020-07-15                    | No                                      | No                                           | Yes                                | Yes                                           | Yes                                   | Unclear                               | Yes                                       | No                                 | Unclear                              | High                     |
| Alharbi                                | 2020-06-17                    | Yes                                     | No                                           | No                                 | No                                            | Unclear                               | No                                    | Yes                                       | No                                 | Unclear                              | High                     |
| Alserehi                               | 2020-05-30                    | Yes                                     | No                                           | Yes                                | No                                            | Unclear                               | Unclear                               | Yes                                       | No                                 | Unclear                              | Moderate                 |
| <b>Turkey</b>                          |                               |                                         |                                              |                                    |                                               |                                       |                                       |                                           |                                    |                                      |                          |
| Sozcu                                  | 2020-06-25                    | Yes                                     | Unclear                                      | Yes                                | No                                            | Unclear                               | Unclear                               | Unclear                                   | No                                 | Unclear                              | Unclear                  |
| Alkurt                                 | 2020-06-06                    | Yes                                     | No                                           | Yes                                | Yes                                           | Yes                                   | Yes                                   | Yes                                       | No                                 | Unclear                              | Moderate                 |
| <b>South Asia</b>                      |                               |                                         |                                              |                                    |                                               |                                       |                                       |                                           |                                    |                                      |                          |
| <b>India</b>                           |                               |                                         |                                              |                                    |                                               |                                       |                                       |                                           |                                    |                                      |                          |
| Khan                                   | 2020-11-04                    | Unclear                                 | Unclear                                      | Unclear                            | Unclear                                       | Unclear                               | Unclear                               | Unclear                                   | Unclear                            | Unclear                              | Low                      |
| Kumar                                  | 2020-10-24                    | Yes                                     | Yes                                          | Yes                                | No                                            | Unclear                               | Unclear                               | Unclear                                   | No                                 | Unclear                              | Unclear                  |
| Sharma                                 | 2020-10-21                    | Yes                                     | Yes                                          | Yes                                | Yes                                           | Yes                                   | Yes                                   | Yes                                       | Yes                                | Unclear                              | Low                      |
| Ramanath                               | 2020-10-18                    | Yes                                     | Yes                                          | Yes                                | No                                            | Unclear                               | Unclear                               | Unclear                                   | Unclear                            | Unclear                              | Unclear                  |
| Banerjee                               | 2020-10-17                    | Yes                                     | Yes                                          | Yes                                | No                                            | Yes                                   | Yes                                   | Yes                                       | Yes                                | No                                   | Moderate                 |
| Babu                                   | 2020-09-16                    | Yes                                     | No                                           | Yes                                | Yes                                           | Unclear                               | Yes                                   | Yes                                       | Yes                                | Unclear                              | Moderate                 |
| Sharma                                 | 2020-09-07                    | Yes                                     | Yes                                          | Yes                                | Yes                                           | Yes                                   | Yes                                   | Yes                                       | Yes                                | Unclear                              | Low                      |

| Article Author<br>(Study Organization) | Sampling End<br>Date<br>(YMD) | Item 1:<br>Appropriate<br>sample frame* | Item 2:<br>Probability<br>sampling<br>method | Item 3:<br>Adequate<br>sample size | Item 4:<br>Subjects &<br>setting<br>described | Item 5: Good<br>coverage of<br>sample | Item 6: Sens ><br>90% & spec ><br>95% | Item 7: Same<br>tests for all<br>subjects | Item 8:<br>Appropriate<br>analysis | Item 9:<br>Adequate<br>response rate | Overall Risk of<br>Bias† |
|----------------------------------------|-------------------------------|-----------------------------------------|----------------------------------------------|------------------------------------|-----------------------------------------------|---------------------------------------|---------------------------------------|-------------------------------------------|------------------------------------|--------------------------------------|--------------------------|
| Goenka                                 | 2020-08-31                    | No                                      | No                                           | No                                 | Yes                                           | Unclear                               | Unclear                               | Yes                                       | No                                 | Yes                                  | High                     |
| Kshatri                                | 2020-08-31                    | Yes                                     | Yes                                          | Yes                                | Yes                                           | Yes                                   | Unclear                               | Yes                                       | Yes                                | No                                   | High                     |
| Singh                                  | 2020-08-30                    | Unclear                                 | Unclear                                      | Yes                                | No                                            | Unclear                               | Unclear                               | Unclear                                   | No                                 | Unclear                              | Unclear                  |
| Mohanan                                | 2020-08-29                    | Yes                                     | Yes                                          | Yes                                | Yes                                           | Yes                                   | No                                    | Yes                                       | Yes                                | No                                   | Moderate                 |
| Goenka                                 | 2020-08-23                    | Yes                                     | Yes                                          | Yes                                | Yes                                           | Unclear                               | Yes                                   | Yes                                       | No                                 | No                                   | Moderate                 |
| Dixit                                  | 2020-08-19                    | Yes                                     | Yes                                          | Yes                                | Yes                                           | Yes                                   | Unclear                               | Yes                                       | No                                 | Yes                                  | Moderate                 |
| Siddiqui                               | 2020-08-15                    | No                                      | No                                           | Yes                                | Yes                                           | Unclear                               | Yes                                   | Yes                                       | No                                 | Unclear                              | High                     |
| Ray                                    | 2020-08-08                    | No                                      | No                                           | No                                 | Yes                                           | Yes                                   | No                                    | Yes                                       | No                                 | Unclear                              | High                     |
| Satpati                                | 2020-08-08                    | Yes                                     | Yes                                          | No                                 | Yes                                           | Yes                                   | Yes                                   | Yes                                       | No                                 | Unclear                              | Moderate                 |
| Bedi                                   | 2020-08-07                    | Yes                                     | Unclear                                      | Yes                                | No                                            | Yes                                   | Unclear                               | Unclear                                   | Unclear                            | Unclear                              | Unclear                  |
| Sharma                                 | 2020-08-07                    | Yes                                     | Yes                                          | Yes                                | Yes                                           | Yes                                   | Yes                                   | Yes                                       | Yes                                | Unclear                              | Low                      |
| Dey                                    | 2020-08-07                    | Unclear                                 | Unclear                                      | Yes                                | No                                            | Unclear                               | Yes                                   | Yes                                       | Yes                                | Unclear                              | Unclear                  |
| Ghose                                  | 2020-08-05                    | Yes                                     | Yes                                          | Yes                                | Yes                                           | Yes                                   | Unclear                               | Yes                                       | Yes                                | Yes                                  | Moderate                 |
| Kumar                                  | 2020-07-24                    | Yes                                     | No                                           | Yes                                | Yes                                           | Yes                                   | Unclear                               | Yes                                       | No                                 | Unclear                              | High                     |
| Malani                                 | 2020-07-19                    | Yes                                     | Yes                                          | Yes                                | Yes                                           | Yes                                   | Yes                                   | Yes                                       | Yes                                | Unclear                              | Low                      |
| Malani                                 | 2020-07-19                    | Yes                                     | Yes                                          | Yes                                | Yes                                           | Yes                                   | Yes                                   | Yes                                       | Yes                                | Unclear                              | Low                      |
| Husain                                 | 2020-07-19                    | No                                      | Yes                                          | Yes                                | No                                            | Unclear                               | Unclear                               | Yes                                       | No                                 | Unclear                              | High                     |
| India.com News<br>Desk                 | 2020-07-19                    | Yes                                     | Yes                                          | Yes                                | No                                            | No                                    | Unclear                               | Unclear                                   | No                                 | Unclear                              | High                     |
| Khan                                   | 2020-07-15                    | No                                      | No                                           | Yes                                | Yes                                           | Yes                                   | Yes                                   | Yes                                       | Yes                                | Yes                                  | Moderate                 |
| Mishra                                 | 2020-07-15                    | No                                      | Yes                                          | Yes                                | No                                            | Unclear                               | Unclear                               | Yes                                       | No                                 | Unclear                              | High                     |

| Article Author<br>(Study Organization) | Sampling End<br>Date<br>(YMD) | Item 1:<br>Appropriate<br>sample frame* | Item 2:<br>Probability<br>sampling<br>method | Item 3:<br>Adequate<br>sample size | Item 4:<br>Subjects &<br>setting<br>described | Item 5: Good<br>coverage of<br>sample | Item 6: Sens ><br>90% & spec ><br>95% | Item 7: Same<br>tests for all<br>subjects | Item 8:<br>Appropriate<br>analysis | Item 9:<br>Adequate<br>response rate | Overall Risk of<br>Bias† |
|----------------------------------------|-------------------------------|-----------------------------------------|----------------------------------------------|------------------------------------|-----------------------------------------------|---------------------------------------|---------------------------------------|-------------------------------------------|------------------------------------|--------------------------------------|--------------------------|
| Unclear                                | 2020-07-11                    | Yes                                     | No                                           | Yes                                | No                                            | Unclear                               | Unclear                               | Unclear                                   | No                                 | Unclear                              | Unclear                  |
| Saxena                                 | 2020-07-10                    | Yes                                     | Yes                                          | Yes                                | No                                            | Unclear                               | Yes                                   | Yes                                       | No                                 | Unclear                              | Moderate                 |
| Dey                                    | 2020-07-10                    | Unclear                                 | Unclear                                      | Yes                                | No                                            | Unclear                               | Yes                                   | Yes                                       | Yes                                | Unclear                              | Unclear                  |
| Prakash                                | 2020-07-07                    | No                                      | No                                           | Yes                                | Yes                                           | Unclear                               | Yes                                   | Yes                                       | No                                 | Unclear                              | High                     |
| Kumar                                  | 2020-06-30                    | No                                      | Unclear                                      | Yes                                | Yes                                           | Unclear                               | Yes                                   | Yes                                       | No                                 | Unclear                              | High                     |
| Singhal                                | 2020-06-30                    | No                                      | No                                           | No                                 | No                                            | No                                    | Yes                                   | No                                        | No                                 | No                                   | High                     |
| Khan                                   | 2020-06-29                    | Yes                                     | No                                           | Yes                                | Yes                                           | Unclear                               | Yes                                   | Yes                                       | No                                 | No                                   | Moderate                 |
| Kumar                                  | 2020-06-12                    | Yes                                     | Unclear                                      | Yes                                | No                                            | Unclear                               | Unclear                               | Unclear                                   | No                                 | Unclear                              | Unclear                  |
| Rao                                    | 2020-06-06                    | Yes                                     | Unclear                                      | Yes                                | No                                            | Unclear                               | Unclear                               | Yes                                       | No                                 | Unclear                              | Unclear                  |
| Murhekar                               | 2020-06-04                    | Yes                                     | Yes                                          | Yes                                | Yes                                           | Yes                                   | Yes                                   | Yes                                       | Yes                                | Yes                                  | Low                      |
| Kher                                   | 2020-05-25                    | Yes                                     | Yes                                          | Yes                                | No                                            | Yes                                   | Unclear                               | Yes                                       | No                                 | Unclear                              | Moderate                 |
| <b>Pakistan</b>                        |                               |                                         |                                              |                                    |                                               |                                       |                                       |                                           |                                    |                                      |                          |
| Nisar                                  | 2020-08-22                    | Yes                                     | Yes                                          | No                                 | Yes                                           | Yes                                   | Yes                                   | Yes                                       | No                                 | No                                   | Moderate                 |
| Nisar                                  | 2020-08-22                    | Yes                                     | Yes                                          | No                                 | Yes                                           | Yes                                   | Yes                                   | Yes                                       | No                                 | No                                   | Moderate                 |
| Zaidi                                  | 2020-07-15                    | No                                      | No                                           | Yes                                | No                                            | Unclear                               | Unclear                               | Yes                                       | No                                 | Unclear                              | High                     |
| Younas                                 | 2020-07-15                    | No                                      | No                                           | No                                 | Yes                                           | No                                    | Unclear                               | No                                        | No                                 | Unclear                              | High                     |
| Noor                                   | 2020-07-15                    | Yes                                     | Yes                                          | Yes                                | Yes                                           | Unclear                               | No                                    | Yes                                       | No                                 | Yes                                  | Moderate                 |
| Nisar                                  | 2020-07-11                    | Yes                                     | Yes                                          | No                                 | Yes                                           | Yes                                   | Yes                                   | Yes                                       | No                                 | No                                   | Moderate                 |
| Nisar                                  | 2020-07-11                    | Yes                                     | Yes                                          | No                                 | Yes                                           | Yes                                   | Yes                                   | Yes                                       | No                                 | No                                   | Moderate                 |
| Haq                                    | 2020-06-29                    | Yes                                     | No                                           | Yes                                | Yes                                           | Unclear                               | Yes                                   | Yes                                       | No                                 | Unclear                              | Moderate                 |
| Chughtai                               | 2020-05-30                    | Yes                                     | No                                           | No                                 | Yes                                           | No                                    | Yes                                   | Yes                                       | No                                 | Unclear                              | High                     |

| Article Author<br>(Study Organization)       | Sampling End<br>Date<br>(YMD) | Item 1:<br>Appropriate<br>sample frame* | Item 2:<br>Probability<br>sampling<br>method | Item 3:<br>Adequate<br>sample size | Item 4:<br>Subjects &<br>setting<br>described | Item 5: Good<br>coverage of<br>sample | Item 6: Sens ><br>90% & spec ><br>95% | Item 7: Same<br>tests for all<br>subjects | Item 8:<br>Appropriate<br>analysis | Item 9:<br>Adequate<br>response rate | Overall Risk of<br>Bias† |
|----------------------------------------------|-------------------------------|-----------------------------------------|----------------------------------------------|------------------------------------|-----------------------------------------------|---------------------------------------|---------------------------------------|-------------------------------------------|------------------------------------|--------------------------------------|--------------------------|
| Nisar                                        | 2020-04-25                    | Yes                                     | Yes                                          | No                                 | Yes                                           | Yes                                   | Yes                                   | Yes                                       | No                                 | No                                   | Moderate                 |
| Nisar                                        | 2020-04-25                    | Yes                                     | Yes                                          | No                                 | Yes                                           | Yes                                   | Yes                                   | Yes                                       | No                                 | No                                   | Moderate                 |
| <b>Southeast Asia, East Asia, an Oceania</b> |                               |                                         |                                              |                                    |                                               |                                       |                                       |                                           |                                    |                                      |                          |
| <b>China</b>                                 |                               |                                         |                                              |                                    |                                               |                                       |                                       |                                           |                                    |                                      |                          |
| Li                                           | 2020-10-15                    | Yes                                     | Unclear                                      | Yes                                | No                                            | Unclear                               | Unclear                               | Yes                                       | No                                 | Unclear                              | High                     |
| Wang                                         | 2020-08-31                    | No                                      | No                                           | Yes                                | Yes                                           | Yes                                   | Unclear                               | Yes                                       | No                                 | Unclear                              | Moderate                 |
| He                                           | 2020-06-10                    | No                                      | No                                           | Yes                                | Yes                                           | Unclear                               | No                                    | Yes                                       | No                                 | Unclear                              | High                     |
| He                                           | 2020-05-29                    | Yes                                     | Unclear                                      | Yes                                | Yes                                           | Unclear                               | Unclear                               | Yes                                       | No                                 | Unclear                              | Unclear                  |
| He                                           | 2020-05-29                    | Yes                                     | Unclear                                      | Yes                                | Yes                                           | Unclear                               | Unclear                               | Yes                                       | No                                 | Unclear                              | Unclear                  |
| Liu                                          | 2020-05-26                    | Yes                                     | Unclear                                      | Yes                                | Yes                                           | Unclear                               | No                                    | Yes                                       | No                                 | Unclear                              | High                     |
| Pan                                          | 2020-05-26                    | Yes                                     | Yes                                          | Yes                                | Yes                                           | Unclear                               | Yes                                   | Yes                                       | No                                 | Unclear                              | Moderate                 |
| Tong                                         | 2020-05-15                    | Yes                                     | Unclear                                      | No                                 | No                                            | No                                    | Unclear                               | Yes                                       | No                                 | Unclear                              | High                     |
| Liang                                        | 2020-04-30                    | Yes                                     | No                                           | Yes                                | Yes                                           | Unclear                               | No                                    | Yes                                       | No                                 | Yes                                  | High                     |
| Liang                                        | 2020-04-30                    | Yes                                     | Unclear                                      | Yes                                | Yes                                           | Unclear                               | No                                    | Yes                                       | No                                 | Yes                                  | High                     |
| Chang                                        | 2020-04-30                    | No                                      | Yes                                          | Yes                                | Yes                                           | Yes                                   | Unclear                               | Yes                                       | No                                 | Unclear                              | High                     |
| Liu                                          | 2020-04-29                    | Yes                                     | No                                           | Yes                                | Yes                                           | Yes                                   | Yes                                   | Yes                                       | No                                 | Yes                                  | Moderate                 |
| Liu                                          | 2020-04-29                    | Yes                                     | Unclear                                      | Yes                                | Yes                                           | Yes                                   | Yes                                   | Yes                                       | No                                 | Yes                                  | Moderate                 |
| Liu                                          | 2020-04-29                    | Yes                                     | No                                           | Yes                                | Yes                                           | Yes                                   | Yes                                   | Yes                                       | No                                 | Yes                                  | Moderate                 |
| Lei                                          | 2020-04-28                    | No                                      | No                                           | Yes                                | No                                            | Unclear                               | No                                    | Yes                                       | No                                 | Unclear                              | High                     |
| Ling                                         | 2020-04-28                    | Yes                                     | No                                           | Yes                                | Yes                                           | Yes                                   | No                                    | Yes                                       | Yes                                | Unclear                              | Moderate                 |
| Want                                         | 2020-04-24                    | Yes                                     | Unclear                                      | No                                 | Yes                                           | Yes                                   | Unclear                               | Unclear                                   | Unclear                            | Unclear                              | Unclear                  |

| Article Author<br>(Study Organization) | Sampling End<br>Date<br>(YMD) | Item 1:<br>Appropriate<br>sample frame* | Item 2:<br>Probability<br>sampling<br>method | Item 3:<br>Adequate<br>sample size | Item 4:<br>Subjects &<br>setting<br>described | Item 5: Good<br>coverage of<br>sample | Item 6: Sens ><br>90% & spec ><br>95% | Item 7: Same<br>tests for all<br>subjects | Item 8:<br>Appropriate<br>analysis | Item 9:<br>Adequate<br>response rate | Overall Risk of<br>Bias† |
|----------------------------------------|-------------------------------|-----------------------------------------|----------------------------------------------|------------------------------------|-----------------------------------------------|---------------------------------------|---------------------------------------|-------------------------------------------|------------------------------------|--------------------------------------|--------------------------|
| Liu                                    | 2020-04-21                    | No                                      | No                                           | No                                 | Yes                                           | Unclear                               | Yes                                   | Yes                                       | No                                 | Unclear                              | High                     |
| Wang                                   | 2020-04-18                    | Yes                                     | Yes                                          | Yes                                | Yes                                           | Yes                                   | No                                    | Unclear                                   | No                                 | Unclear                              | Moderate                 |
| Wu                                     | 2020-04-15                    | Yes                                     | Unclear                                      | No                                 | No                                            | Unclear                               | Unclear                               | Yes                                       | No                                 | Unclear                              | High                     |
| Wu                                     | 2020-04-15                    | No                                      | Unclear                                      | Yes                                | No                                            | Unclear                               | Unclear                               | Yes                                       | No                                 | Unclear                              | High                     |
| Xu                                     | 2020-04-10                    | Yes                                     | No                                           | Yes                                | Yes                                           | Unclear                               | Unclear                               | Yes                                       | No                                 | Unclear                              | High                     |
| Xu                                     | 2020-04-10                    | Yes                                     | No                                           | Yes                                | Yes                                           | Unclear                               | Unclear                               | Yes                                       | No                                 | Unclear                              | High                     |
| Xu                                     | 2020-04-02                    | No                                      | Yes                                          | Yes                                | Yes                                           | No                                    | Unclear                               | Yes                                       | No                                 | Unclear                              | High                     |
| Zhang                                  | 2020-03-27                    | No                                      | No                                           | No                                 | Yes                                           | Yes                                   | Unclear                               | Yes                                       | No                                 | Unclear                              | High                     |
| Zhou                                   | 2020-03-25                    | Yes                                     | No                                           | Yes                                | Yes                                           | Yes                                   | Unclear                               | Yes                                       | No                                 | Yes                                  | Moderate                 |
| Li                                     | 2020-03-22                    | Unclear                                 | No                                           | No                                 | No                                            | Unclear                               | Yes                                   | Yes                                       | No                                 | Unclear                              | High                     |
| Tang                                   | 2020-03-21                    | Yes                                     | Yes                                          | Yes                                | Yes                                           | Yes                                   | No                                    | Yes                                       | No                                 | Yes                                  | Moderate                 |
| Tu                                     | 2020-03-20                    | Yes                                     | No                                           | No                                 | No                                            | Unclear                               | Unclear                               | Yes                                       | No                                 | Unclear                              | High                     |
| Zhang                                  | 2020-03-18                    | Yes                                     | No                                           | Yes                                | No                                            | Unclear                               | Unclear                               | Yes                                       | No                                 | Unclear                              | High                     |
| Xiong                                  | 2020-03-17                    | Unclear                                 | Unclear                                      | Yes                                | Yes                                           | Unclear                               | Unclear                               | Yes                                       | No                                 | Unclear                              | Unclear                  |
| To                                     | 2020-03-17                    | Yes                                     | Yes                                          | Yes                                | No                                            | Yes                                   | No                                    | Yes                                       | No                                 | Unclear                              | Moderate                 |
| Chang                                  | 2020-03-15                    | No                                      | Yes                                          | Yes                                | Yes                                           | Yes                                   | Unclear                               | Yes                                       | No                                 | Unclear                              | High                     |
| Chang                                  | 2020-03-15                    | No                                      | Yes                                          | Yes                                | Yes                                           | Yes                                   | Unclear                               | Yes                                       | No                                 | Unclear                              | High                     |
| Zhao                                   | 2020-02-21                    | Yes                                     | No                                           | Yes                                | No                                            | Unclear                               | Unclear                               | Yes                                       | No                                 | Yes                                  | High                     |
| Chen                                   | 2020-02-19                    | No                                      | Yes                                          | No                                 | Yes                                           | Yes                                   | Yes                                   | Yes                                       | No                                 | Yes                                  | High                     |
| Zhang                                  | 2020-02-16                    | No                                      | No                                           | No                                 | Yes                                           | Unclear                               | Yes                                   | Yes                                       | No                                 | Unclear                              | High                     |
| Zhang                                  | 2020-02-16                    | No                                      | No                                           | No                                 | Yes                                           | Unclear                               | Yes                                   | Yes                                       | No                                 | Unclear                              | High                     |

| Article Author<br>(Study Organization) | Sampling End<br>Date<br>(YMD) | Item 1:<br>Appropriate<br>sample frame* | Item 2:<br>Probability<br>sampling<br>method | Item 3:<br>Adequate<br>sample size | Item 4:<br>Subjects &<br>setting<br>described | Item 5: Good<br>coverage of<br>sample | Item 6: Sens ><br>90% & spec ><br>95% | Item 7: Same<br>tests for all<br>subjects | Item 8:<br>Appropriate<br>analysis | Item 9:<br>Adequate<br>response rate | Overall Risk of<br>Bias <sup>†</sup> |
|----------------------------------------|-------------------------------|-----------------------------------------|----------------------------------------------|------------------------------------|-----------------------------------------------|---------------------------------------|---------------------------------------|-------------------------------------------|------------------------------------|--------------------------------------|--------------------------------------|
| Zhang                                  | 2020-02-16                    | No                                      | No                                           | No                                 | Yes                                           | Unclear                               | Yes                                   | Yes                                       | No                                 | Unclear                              | High                                 |
| To                                     | 2020-02-13                    | No                                      | No                                           | No                                 | No                                            | Unclear                               | No                                    | Yes                                       | No                                 | Unclear                              | High                                 |
| To                                     | 2020-01-31                    | No                                      | No                                           | Yes                                | No                                            | Unclear                               | No                                    | Yes                                       | No                                 | Unclear                              | High                                 |
| Hallowell                              | 2020-01-28                    | No                                      | Yes                                          | No                                 | Yes                                           | Yes                                   | Unclear                               | Yes                                       | No                                 | Yes                                  | High                                 |
| <b>Malaysia</b>                        |                               |                                         |                                              |                                    |                                               |                                       |                                       |                                           |                                    |                                      |                                      |
| Sam                                    | 2020-06-06                    | No                                      | No                                           | Yes                                | No                                            | Unclear                               | Yes                                   | Yes                                       | No                                 | Unclear                              | High                                 |
| <b>Thailand</b>                        |                               |                                         |                                              |                                    |                                               |                                       |                                       |                                           |                                    |                                      |                                      |
| Nopsopon                               | 2020-06-26                    | Yes                                     | No                                           | Yes                                | Yes                                           | Yes                                   | Yes                                   | Yes                                       | No                                 | Unclear                              | Moderate                             |
| Nopsopon                               | 2020-05-17                    | No                                      | No                                           | Yes                                | Yes                                           | Yes                                   | Yes                                   | Yes                                       | No                                 | Yes                                  | Moderate                             |
| <b>Vietnam</b>                         |                               |                                         |                                              |                                    |                                               |                                       |                                       |                                           |                                    |                                      |                                      |
| Chau                                   | 2020-08-30                    | Yes                                     | No                                           | No                                 | Yes                                           | Unclear                               | Yes                                   | Yes                                       | No                                 | No                                   | High                                 |
| <b>Sub-Saharan Africa</b>              |                               |                                         |                                              |                                    |                                               |                                       |                                       |                                           |                                    |                                      |                                      |
| <b>Congo</b>                           |                               |                                         |                                              |                                    |                                               |                                       |                                       |                                           |                                    |                                      |                                      |
| Batchi-Bouyou                          | 2020-07-31                    | Unclear                                 | No                                           | Yes                                | Yes                                           | Unclear                               | Yes                                   | Yes                                       | No                                 | Unclear                              | High                                 |
| <b>Ethiopia</b>                        |                               |                                         |                                              |                                    |                                               |                                       |                                       |                                           |                                    |                                      |                                      |
| Kempen                                 | 2020-05-21                    | No                                      | No                                           | No                                 | Yes                                           | Yes                                   | Yes                                   | Yes                                       | No                                 | Unclear                              | High                                 |
| Alemu                                  | 2020-04-28                    | Yes                                     | Yes                                          | No                                 | Yes                                           | Unclear                               | No                                    | Yes                                       | No                                 | Unclear                              | Moderate                             |
| <b>Kenya</b>                           |                               |                                         |                                              |                                    |                                               |                                       |                                       |                                           |                                    |                                      |                                      |
| Adetifa                                | 2020-09-30                    | No                                      | Yes                                          | Yes                                | Yes                                           | Yes                                   | Yes                                   | Yes                                       | Yes                                | Unclear                              | Low                                  |
| <b>Malawi</b>                          |                               |                                         |                                              |                                    |                                               |                                       |                                       |                                           |                                    |                                      |                                      |
| Chibwana                               | 2020-06-19                    | Yes                                     | No                                           | No                                 | Yes                                           | Yes                                   | No                                    | Yes                                       | No                                 | Unclear                              | High                                 |



| Article Author<br>(Study Organization) | Sampling End<br>Date<br>(YMD) | Item 1:<br>Appropriate<br>sample frame* | Item 2:<br>Probability<br>sampling<br>method | Item 3:<br>Adequate<br>sample size | Item 4:<br>Subjects &<br>setting<br>described | Item 5: Good<br>coverage of<br>sample | Item 6: Sens ><br>90% & spec ><br>95% | Item 7: Same<br>tests for all<br>subjects | Item 8:<br>Appropriate<br>analysis | Item 9:<br>Adequate<br>response rate | Overall Risk of<br>Bias† |
|----------------------------------------|-------------------------------|-----------------------------------------|----------------------------------------------|------------------------------------|-----------------------------------------------|---------------------------------------|---------------------------------------|-------------------------------------------|------------------------------------|--------------------------------------|--------------------------|
| <b>Nigeria</b>                         |                               |                                         |                                              |                                    |                                               |                                       |                                       |                                           |                                    |                                      |                          |
| Majiya                                 | 2020-06-30                    | Yes                                     | Yes                                          | No                                 | Yes                                           | Yes                                   | Yes                                   | Yes                                       | No                                 | Unclear                              | Moderate                 |
| Asuquo                                 | 2020-06-24                    | Unclear                                 | Yes                                          | No                                 | No                                            | No                                    | Unclear                               | Yes                                       | No                                 | Unclear                              | High                     |
| <b>South Africa</b>                    |                               |                                         |                                              |                                    |                                               |                                       |                                       |                                           |                                    |                                      |                          |
| Shaw                                   | 2020-09-04                    | No                                      | No                                           | No                                 | Yes                                           | Unclear                               | Yes                                   | Yes                                       | No                                 | No                                   | High                     |
| Hsiao                                  | 2020-08-07                    | No                                      | No                                           | Yes                                | Yes                                           | Unclear                               | Yes                                   | Yes                                       | No                                 | Unclear                              | High                     |
| <b>Togo</b>                            |                               |                                         |                                              |                                    |                                               |                                       |                                       |                                           |                                    |                                      |                          |
| Halatoko                               | 2020-05-08                    | Yes                                     | Yes                                          | Yes                                | Yes                                           | Unclear                               | No                                    | Yes                                       | No                                 | Unclear                              | High                     |

**S4 Table. Summary of unadjusted meta-analysis results**

| Factor                               | Reference Group                           | Comparison Group                       | Number of Studies | Risk Ratio (95% CI) <sup>a</sup> | Heterogeneity (I <sup>2</sup> ) |
|--------------------------------------|-------------------------------------------|----------------------------------------|-------------------|----------------------------------|---------------------------------|
| Age                                  | Adults (18-64)                            | Youth (0-17)                           | 82                | 0.91 (0.83-1.00)                 | 86.5%                           |
|                                      | Adults (18-64)                            | Seniors (65+)                          | 127               | 0.84 (0.77-0.92)                 | 92.7%                           |
| Sex/Gender                           | Female                                    | Male                                   | 129               | 1.02 (0.98-1.06)                 | 87.1%                           |
| Race                                 | Caucasian                                 | Black                                  | 19                | 2.46 (2.14-2.83)                 | 87.7%                           |
|                                      | Caucasian                                 | Asian                                  | 17                | 1.77 (1.44-2.17)                 | 90.8%                           |
|                                      | Caucasian                                 | Indigenous                             | 8                 | 2.00 (1.14-3.50)                 | 81.1%                           |
|                                      | Caucasian                                 | Multiple/other                         | 18                | 1.55 (1.37-1.76)                 | 63.5%                           |
| Close contact with COVID-19 patients | Individuals with no close contact         | Individuals with close contact         | 35                | 1.97 (1.32-2.92)                 | 98.4%                           |
|                                      | Health care workers with no close contact | Health care workers with close contact | 44                | 1.57 (1.33-1.85)                 | 94.8%                           |
| Health care worker status            | Non-health care workers and caregivers    | Health care workers and caregivers     | 19                | 1.24 (0.99-1.54)                 | 95.2%                           |

<sup>a</sup>Using adjusted seroprevalence estimates. Abbreviations: CI= confidence interval.

**S5 Table. Summary of serological tests used in included seroprevalence studies**

| Manufacturer                                           | Test Name                                                                                        | Isotype  | No. of studies |
|--------------------------------------------------------|--------------------------------------------------------------------------------------------------|----------|----------------|
| Abbott Laboratories                                    | Abbott Architect SARS-CoV-2 IgG                                                                  | IgG      | 124            |
|                                                        | Abbott Alinity SARS-COV-2 IgG                                                                    | IgG      | 1              |
| ACRO Biotech Inc.                                      | Acro Biotech COVID-19 Rapid POC test                                                             | IgM      | 2              |
|                                                        |                                                                                                  | IgG      | 1              |
|                                                        | Not available                                                                                    | IgG; IgM | 2              |
| Artron Laboratories Inc.                               | One Step Novel Coronavirus (COVID-19) IgM/IgG Antibody Test                                      | IgG; IgM | 4              |
|                                                        |                                                                                                  | IgG      | 1              |
|                                                        |                                                                                                  | IgM      | 1              |
| Aurora Biomed Inc                                      | COVID-19 IgG/IgM Rapid Test                                                                      | IgG; IgM | 1              |
| Beijing Wantai Biological Pharmacy Enterprise Co., Ltd | Wantai SARS-CoV-2 Ab ELISA                                                                       | Total Ig | 9              |
|                                                        | Wantai SARS-CoV-2 IgM ELISA                                                                      | IgM      | 2              |
|                                                        | Wantai SARS-CoV-2 Ab ELISA                                                                       | IgG      | 1              |
| BioMedomics, Inc.                                      | COVID-19 IgM-IgG Dual Antibody Rapid Test                                                        | IgG      | 4              |
|                                                        |                                                                                                  | IgM      | 4              |
|                                                        |                                                                                                  | IgG; IgM | 3              |
| Cellex Inc.                                            | COVID-19 IgG/IgM Rapid Test Cassette                                                             | IgG; IgM | 1              |
| CTK Biotech, Inc.                                      | OnSite COVID-19 IgG/IgM Rapid Test                                                               | IgG; IgM | 1              |
| DiaSorin SpA                                           | Liaison SARS-CoV-2 S1/S2 IgG                                                                     | IgG      | 19             |
| DRG International, Inc.                                | Novel Coronavirus COVID-19 IgG                                                                   | IgG      | 1              |
| Euroimmun AG                                           | Anti-SARS-CoV-2 ELISA (IgG) (manual, automated)                                                  | IgG      | 35             |
|                                                        | EI SARS-Cov-2 IgG assay                                                                          | IgG      | 34             |
|                                                        | Anti-SARS-CoV-2 ELISA (IgA) (manual, automated)                                                  | IgA      | 6              |
|                                                        | Anti-SARS-CoV-2 ELISA (IgA) (manual, automated); Anti-SARS-CoV-2 ELISA (IgG) (manual, automated) | IgA; IgG | 7              |
|                                                        | Euroimmun EIA                                                                                    | IgA      | 4              |
|                                                        | Euroimmun                                                                                        | IgG      | 1              |
| Epitope Diagnostics, Inc.                              | EDI™ Novel Coronavirus COVID-19 IgG ELISA Kit                                                    | IgG      | 7              |
|                                                        | EDI™ Novel Coronavirus COVID-19 IgM ELISA Kit                                                    | IgM      | 3              |
|                                                        | EDI™ Novel Coronavirus COVID-19 IgM ELISA Kit; EDI™ Novel Coronavirus COVID-19 IgG ELISA Kit     | IgG; IgM | 2              |
| ET Healthcare                                          | Pylon COVID-19 IgG/IgM assay                                                                     | IgG      | 1              |
|                                                        |                                                                                                  | IgG; IgM | 1              |
|                                                        |                                                                                                  | IgM      | 1              |
| Guangzhou Wondfo Biotech Co., Ltd                      | Wondfo SARS-CoV-2 Antibody Test (lateral flow method)                                            | IgG; IgM | 12             |
|                                                        | Finecare SARS-CoV-2 Antibody test                                                                | Total Ig | 4              |
| Hangzhou AllTest Biotech Co., Ltd                      | 2019-nCoV IgG/IgM Rapid Test Cassette                                                            | IgG      | 2              |
|                                                        |                                                                                                  | IgG; IgM | 2              |
|                                                        |                                                                                                  | IgM      | 1              |
| Hangzhou Biotest Biotech Co., Ltd                      | COVID-19 IgG/IgM Rapid Test Cassette                                                             | IgG; IgM | 2              |
| Hangzhou Clongene Biotech Co., Ltd                     | 2019-nCoV IgG/IgM Rapid Test                                                                     | IgG      | 1              |
|                                                        |                                                                                                  | IgG; IgM | 1              |
|                                                        |                                                                                                  | IgM      | 1              |
| Healgen                                                | COVID-19 IgG/IgM Rapid Test Cassette                                                             | IgG      | 1              |
|                                                        |                                                                                                  | IgG; IgM | 1              |
|                                                        |                                                                                                  | IgM      | 1              |
| ImmunoDiagnostics limited                              | SARS-CoV-2 NP IgG ELISA Kit                                                                      | IgG      | 1              |
|                                                        | SARS-CoV-2 NP IgM ELISA Kit                                                                      | IgM      | 1              |
| Innovita Biological Technology Co. Ltd                 | 2019-nCoV Ab Test (Colloidal Gold) (IgM/IgG Whole Blood/Serum/Plasma Combo)                      | IgG; IgM | 6              |
|                                                        | SARS-CoV-2 IgG Ab Rapid Test                                                                     | IgM      | 2              |
| Mikrogen GmbH                                          | recomWell SARS-CoV-2 IgG ELISA                                                                   | IgG      | 1              |
| Mologic Ltd                                            | SARS-CoV-2 ELISA Serology                                                                        | IgG      | 1              |
| Multi-G B.V.                                           | COVID-19 IgG/IgM Ab Test Cassette (Whole Blood/Serum/Plasma)                                     | IgG      | 1              |
| nal von minden GmbH                                    | NADAL® COVID-19 IgG/IgM Test                                                                     | IgG      | 1              |
|                                                        |                                                                                                  | IgM      | 1              |
| Ortho Clinical Diagnostics                             | VITROS® Immunodiagnostic Products Anti-SARS-CoV-2 Total                                          | Total Ig | 5              |
|                                                        | VITROS® Immunodiagnostic Products Anti-SARS-CoV-2 IgG                                            | IgG      | 12             |

| Manufacturer                                                             | Test Name                                                                                          | Isotype       | No. of studies |
|--------------------------------------------------------------------------|----------------------------------------------------------------------------------------------------|---------------|----------------|
| PCL Inc.                                                                 | PCL COVID19 IgG/IgM Rapid Gold                                                                     | IgG; IgM      | 1              |
| Phamatech                                                                | COVID19 RAPID TEST                                                                                 | IgG; IgM      | 1              |
| Premier Biotech                                                          | COVID-19 IgG/IgM Rapid Test Cassette                                                               | IgG; IgM      | 2              |
| PRIMA Lab S.A.                                                           | PRIMA COVID-19 IgG/IgM Rapid Test                                                                  | IgG; IgM      | 3              |
|                                                                          |                                                                                                    | IgG           | 2              |
| RayBiotech                                                               | Novel Coronavirus IgG antibody test kit (colloidal gold method)                                    | IgG           | 1              |
| Roche Diagnostics, Basel, Switzerland                                    | Elecsys Anti-SARS-CoV-2                                                                            | Total Ig      | 17             |
|                                                                          |                                                                                                    | IgG; IgM      | 20             |
|                                                                          | Anti-SARS-CoV-2 ELISA (IgA) (manual, automated)                                                    | IgA; IgG; IgM | 4              |
| Shanghai Kehua Bio-engineering Co., Ltd                                  | Diagnostic kit for SARS-CoV-2 IgM/IgG Antibody (Colloidal Gold)                                    | IgG; IgM      | 3              |
| Shenzhen Yahuilong Biotechnology Co Ltd                                  | 2019-nCoV IgG/IgM Antibody Detection Kit                                                           | IgG           | 4              |
|                                                                          |                                                                                                    | IgM           | 4              |
| Shenzhen Yhlo Biotech Co. Ltd                                            | SARS-CoV-2 IgM and IgG chemiluminescence immunoassay                                               | IgG           | 7              |
|                                                                          |                                                                                                    | IgM           | 4              |
|                                                                          | iFlash-SARS-CoV-2 IgG                                                                              | IgG           | 2              |
|                                                                          | SARS-CoV-2 IgM/IgG CLIA kits                                                                       | IgG           | 1              |
|                                                                          |                                                                                                    | IgM           | 1              |
| iFlash-SARS-CoV-2 IgM                                                    | IgM                                                                                                | 1             |                |
| Siemens                                                                  | Atellica® IM SARS-CoV-2 Total (COV2T)                                                              | Total Ig      | 4              |
| Snibe Co., Ltd (Shenzhen New Industries Biomedical Engineering Co., Ltd) | MAGLUMI 2019-nCoV IgG (CLIA)                                                                       | IgG           | 10             |
|                                                                          | MAGLUMI 2019-nCoV IgM (CLIA)                                                                       | IgM           | 7              |
| Sugentech, Inc.                                                          | SGTi-flex COVID-19 IgM/IgG (manual)                                                                | IgG; IgM      | 1              |
| SureScreen Diagnostics                                                   | COVID-19 IgG/IgM Rapid Test Cassette                                                               | IgG           | 1              |
| Tangshan Yingnuote Biotechnology Enterprise Co., Ltd.                    | Colloidal Gold Immunochromatography Assay (CGIA) kit                                               | IgG; IgM      | 1              |
| TestsealabsE                                                             | SARS-COV-2-IgG/IgM Test Cassette                                                                   | IgG; IgM      | 2              |
|                                                                          |                                                                                                    | IgG           | 1              |
|                                                                          |                                                                                                    | IgM           | 1              |
| UCP Biosciences                                                          | Coronavirus IgG/IgM Antibody (COVID-19) Test Cassette                                              | IgG; IgM      | 2              |
|                                                                          |                                                                                                    | IgG           | 1              |
|                                                                          |                                                                                                    | IgM           | 1              |
| Vircell S.L.                                                             | COVID-19 ELISA IgG                                                                                 | IgG           | 3              |
|                                                                          | COVID-19 ELISA IgM+IgA                                                                             | IgA; IgM      | 3              |
| VivaChek Biotech (Hangzhou) Co., Ltd                                     | VivaDiag COVID-19 IgM/IgG Rapid Test                                                               | IgG; IgM      | 3              |
| Wadsworth Center, New York State Department of Health                    | New York SARS-CoV Microsphere Immunoassay for Antibody Detection                                   | Total Ig      | 1              |
| Xiamen Wantai Kairui Biotechnology                                       | Not available                                                                                      | Total Ig      | 7              |
| Zhejiang Orient Gene Biotech                                             | COVID-19 IgG/IgM Rapid Test                                                                        | IgG           | 9              |
|                                                                          |                                                                                                    | IgG; IgM      | 8              |
|                                                                          |                                                                                                    | IgM           | 7              |
| Zhuhai Livzon Diagnostics Inc                                            | 2019-nCoV IgG/IgM Antibody Detection Kit                                                           | IgG           | 4              |
|                                                                          |                                                                                                    | IgM           | 4              |
|                                                                          |                                                                                                    | IgG; IgM      | 2              |
|                                                                          | Diagnostic Kit for IgM / IgG Antibody to Coronavirus (SARS-CoV-2) (Lateral Flow)                   | IgG           | 2              |
|                                                                          |                                                                                                    | IgG; IgM      | 2              |
| No independent evaluation available                                      | Multiple tests used                                                                                | -             | 275            |
|                                                                          | Author designed or validated test, not in Finddx database                                          | -             | 139            |
|                                                                          | Not enough test information reported to match                                                      | -             | 89             |
|                                                                          | Commercially available but not in the Finddx database                                              | -             | 66             |
|                                                                          | Evaluations for separate isotypes, review authors report combined positivity rate (and/or isotype) | -             | 12             |
|                                                                          | Evaluation for combined isotype, study examined individual isotypes                                | -             | 9              |

**S6 Table. Summary of meta-regression results**

| Study Characteristics                                                                                                                                                                                                                                                                                                                                                                                                                                                                                                                                                                                                                                                                                                                                                                                                                                                                                                | Analysis using uncorrected seroprevalence estimates                     |                    |         | Analysis using corrected seroprevalence estimates                       |                    |         |
|----------------------------------------------------------------------------------------------------------------------------------------------------------------------------------------------------------------------------------------------------------------------------------------------------------------------------------------------------------------------------------------------------------------------------------------------------------------------------------------------------------------------------------------------------------------------------------------------------------------------------------------------------------------------------------------------------------------------------------------------------------------------------------------------------------------------------------------------------------------------------------------------------------------------|-------------------------------------------------------------------------|--------------------|---------|-------------------------------------------------------------------------|--------------------|---------|
|                                                                                                                                                                                                                                                                                                                                                                                                                                                                                                                                                                                                                                                                                                                                                                                                                                                                                                                      | Change in Seroprevalence (coefficient $\beta$ ) <sup>a,b</sup> (95% CI) | Risk ratio (95%CI) | p-value | Change in Seroprevalence (coefficient $\beta$ ) <sup>a,c</sup> (95% CI) | Risk ratio (95%CI) | p-value |
| <b>Risk of Bias</b>                                                                                                                                                                                                                                                                                                                                                                                                                                                                                                                                                                                                                                                                                                                                                                                                                                                                                                  |                                                                         |                    |         |                                                                         |                    |         |
| Low                                                                                                                                                                                                                                                                                                                                                                                                                                                                                                                                                                                                                                                                                                                                                                                                                                                                                                                  | Reference                                                               | -                  | -       | Reference                                                               | -                  | -       |
| Moderate                                                                                                                                                                                                                                                                                                                                                                                                                                                                                                                                                                                                                                                                                                                                                                                                                                                                                                             | -0.02 (-0.33, 0.30)                                                     | 0.98 (0.72, 1.35)  | 0.92    | -0.51 (-0.83, -0.20)                                                    | 0.60 (0.44, 0.82)  | 0.001   |
| High                                                                                                                                                                                                                                                                                                                                                                                                                                                                                                                                                                                                                                                                                                                                                                                                                                                                                                                 | 0.02 (-0.30, 0.35)                                                      | 1.02 (0.74, 1.42)  | 0.89    | -0.43 (-0.76, -0.10)                                                    | 0.65 (0.47, 0.90)  | 0.01    |
| Unclear                                                                                                                                                                                                                                                                                                                                                                                                                                                                                                                                                                                                                                                                                                                                                                                                                                                                                                              | -0.30 (-0.69, 0.08)                                                     | 0.74 (0.50, 1.09)  | 0.12    | -0.96 (-1.49, -0.43)                                                    | 0.38 (0.22, 0.65)  | <0.001  |
| <b>Population Group</b>                                                                                                                                                                                                                                                                                                                                                                                                                                                                                                                                                                                                                                                                                                                                                                                                                                                                                              |                                                                         |                    |         |                                                                         |                    |         |
| Household and community sample                                                                                                                                                                                                                                                                                                                                                                                                                                                                                                                                                                                                                                                                                                                                                                                                                                                                                       | Reference                                                               | -                  | -       | Reference                                                               | -                  | -       |
| Blood donors                                                                                                                                                                                                                                                                                                                                                                                                                                                                                                                                                                                                                                                                                                                                                                                                                                                                                                         | -0.15 (-0.35, 0.06)                                                     | 0.86 (0.70, 1.06)  | 0.16    | 0.04 (-0.20, 0.27)                                                      | 1.04 (0.82, 1.31)  | 0.77    |
| Residual sera                                                                                                                                                                                                                                                                                                                                                                                                                                                                                                                                                                                                                                                                                                                                                                                                                                                                                                        | -0.33 (-0.49, -0.16)                                                    | 0.72 (0.61, 0.85)  | <0.001  | -0.12 (-0.30, 0.06)                                                     | 0.89 (0.74, 1.06)  | 0.19    |
| <b>Estimate Grade</b>                                                                                                                                                                                                                                                                                                                                                                                                                                                                                                                                                                                                                                                                                                                                                                                                                                                                                                |                                                                         |                    |         |                                                                         |                    |         |
| National                                                                                                                                                                                                                                                                                                                                                                                                                                                                                                                                                                                                                                                                                                                                                                                                                                                                                                             | Reference                                                               | -                  | -       | Reference                                                               | -                  | -       |
| Regional                                                                                                                                                                                                                                                                                                                                                                                                                                                                                                                                                                                                                                                                                                                                                                                                                                                                                                             | -0.02 (-0.23, 0.19)                                                     | 0.98 (0.79, 1.20)  | 0.84    | 0.50 (0.26, 0.74)                                                       | 1.65 (1.30, 2.09)  | <0.001  |
| Local                                                                                                                                                                                                                                                                                                                                                                                                                                                                                                                                                                                                                                                                                                                                                                                                                                                                                                                | 0.43 (0.22, 0.64)                                                       | 1.54 (1.25, 1.90)  | <0.001  | 0.76 (0.52, 1.00)                                                       | 2.14 (1.68, 2.72)  | <0.001  |
| Sublocal                                                                                                                                                                                                                                                                                                                                                                                                                                                                                                                                                                                                                                                                                                                                                                                                                                                                                                             | 0.50 (0.16, 0.85)                                                       | 1.66 (1.17, 2.34)  | 0.004   | 0.66 (0.21, 1.11)                                                       | 1.93 (1.23, 3.03)  | 0.004   |
| <b>Cases per 100,000 population</b>                                                                                                                                                                                                                                                                                                                                                                                                                                                                                                                                                                                                                                                                                                                                                                                                                                                                                  |                                                                         |                    |         |                                                                         |                    |         |
| Cases per 100,000                                                                                                                                                                                                                                                                                                                                                                                                                                                                                                                                                                                                                                                                                                                                                                                                                                                                                                    | 0.43 (0.31, 0.55)                                                       | 1.54 (1.37, 1.73)  | <0.001  | 0.30 (0.18, 0.43)                                                       | 1.35 (1.19, 1.53)  | <0.001  |
| <b>GBD Region</b>                                                                                                                                                                                                                                                                                                                                                                                                                                                                                                                                                                                                                                                                                                                                                                                                                                                                                                    |                                                                         |                    |         |                                                                         |                    |         |
| High-Income                                                                                                                                                                                                                                                                                                                                                                                                                                                                                                                                                                                                                                                                                                                                                                                                                                                                                                          | Reference                                                               | -                  | -       | Reference                                                               | -                  | -       |
| North Africa and Middle East                                                                                                                                                                                                                                                                                                                                                                                                                                                                                                                                                                                                                                                                                                                                                                                                                                                                                         | 0.65 (-0.03, 1.32)                                                      | 1.91 (0.97, 3.75)  | 0.06    | -0.22 (-0.91, 0.47)                                                     | 0.80 (0.40, 1.60)  | 0.53    |
| Southeast Asia, East Asia, and Oceania                                                                                                                                                                                                                                                                                                                                                                                                                                                                                                                                                                                                                                                                                                                                                                                                                                                                               | -1.28 (-1.67, -0.88)                                                    | 0.28 (0.19, 0.41)  | <0.001  | -1.74 (-2.41, -1.07)                                                    | 0.18 (0.09, 0.34)  | <0.001  |
| Central Europe, Eastern Europe, and Central Asia                                                                                                                                                                                                                                                                                                                                                                                                                                                                                                                                                                                                                                                                                                                                                                                                                                                                     | 0.45 (0.04, 0.87)                                                       | 1.57 (1.04, 2.38)  | 0.03    | 1.04 (0.56, 1.52)                                                       | 2.83 (1.75, 4.55)  | <0.001  |
| Latin America and Caribbean                                                                                                                                                                                                                                                                                                                                                                                                                                                                                                                                                                                                                                                                                                                                                                                                                                                                                          | 0.39 (0.16, 0.63)                                                       | 1.48 (1.17, 1.87)  | <0.001  | 1.00 (0.73, 1.26)                                                       | 2.71 (2.07, 3.54)  | <0.001  |
| South Asia                                                                                                                                                                                                                                                                                                                                                                                                                                                                                                                                                                                                                                                                                                                                                                                                                                                                                                           | 1.20 (0.93, 1.47)                                                       | 3.30 (2.52, 4.33)  | <0.001  | 1.04 (0.74, 1.35)                                                       | 2.84 (2.09, 3.85)  | <0.001  |
| Sub-Saharan Africa                                                                                                                                                                                                                                                                                                                                                                                                                                                                                                                                                                                                                                                                                                                                                                                                                                                                                                   | 1.34 (0.75, 1.93)                                                       | 3.81 (2.11, 6.89)  | <0.001  | 1.61 (1.06, 2.16)                                                       | 5.01 (2.89, 8.69)  | <0.001  |
| <p><sup>a</sup>The regression coefficient <math>\beta</math> refers to the change in the log seroprevalence of antibodies to SARS-CoV-2 given changes in the covariate. <sup>b</sup>Details of uncorrected model: Intercept coefficient <math>\beta</math> -3.45 (95%CI -3.76, -3.13); Mixed-Effects Model (k = 570); tau<sup>2</sup> 0.4759 (SE = 0.1331); I<sup>2</sup>=99.64%; R<sup>2</sup>=21.26%. Test of Moderators (coefficients 2:16): QM(df = 15) = 263.86, p-val &lt; 0.0001. <sup>c</sup>Details of corrected model: Intercept coefficient <math>\beta</math> -3.45 (95%CI -3.78, -3.12); Mixed-Effects Model (k = 417); tau<sup>2</sup> =0.3574(SE =0.0791); I<sup>2</sup>=98.94%; R<sup>2</sup>=63.97%. Test of Moderators (coefficients 2:16): QM(df = 15) = 322.6942, p-val &lt; 0.0001. Abbreviations: B = beta; CI = confidence interval; exp = exponentiated; GBD = global burden of disease.</p> |                                                                         |                    |         |                                                                         |                    |         |

## Supplementary figures

### S1 Figure. Map of serosurvey distribution by global burden of disease region

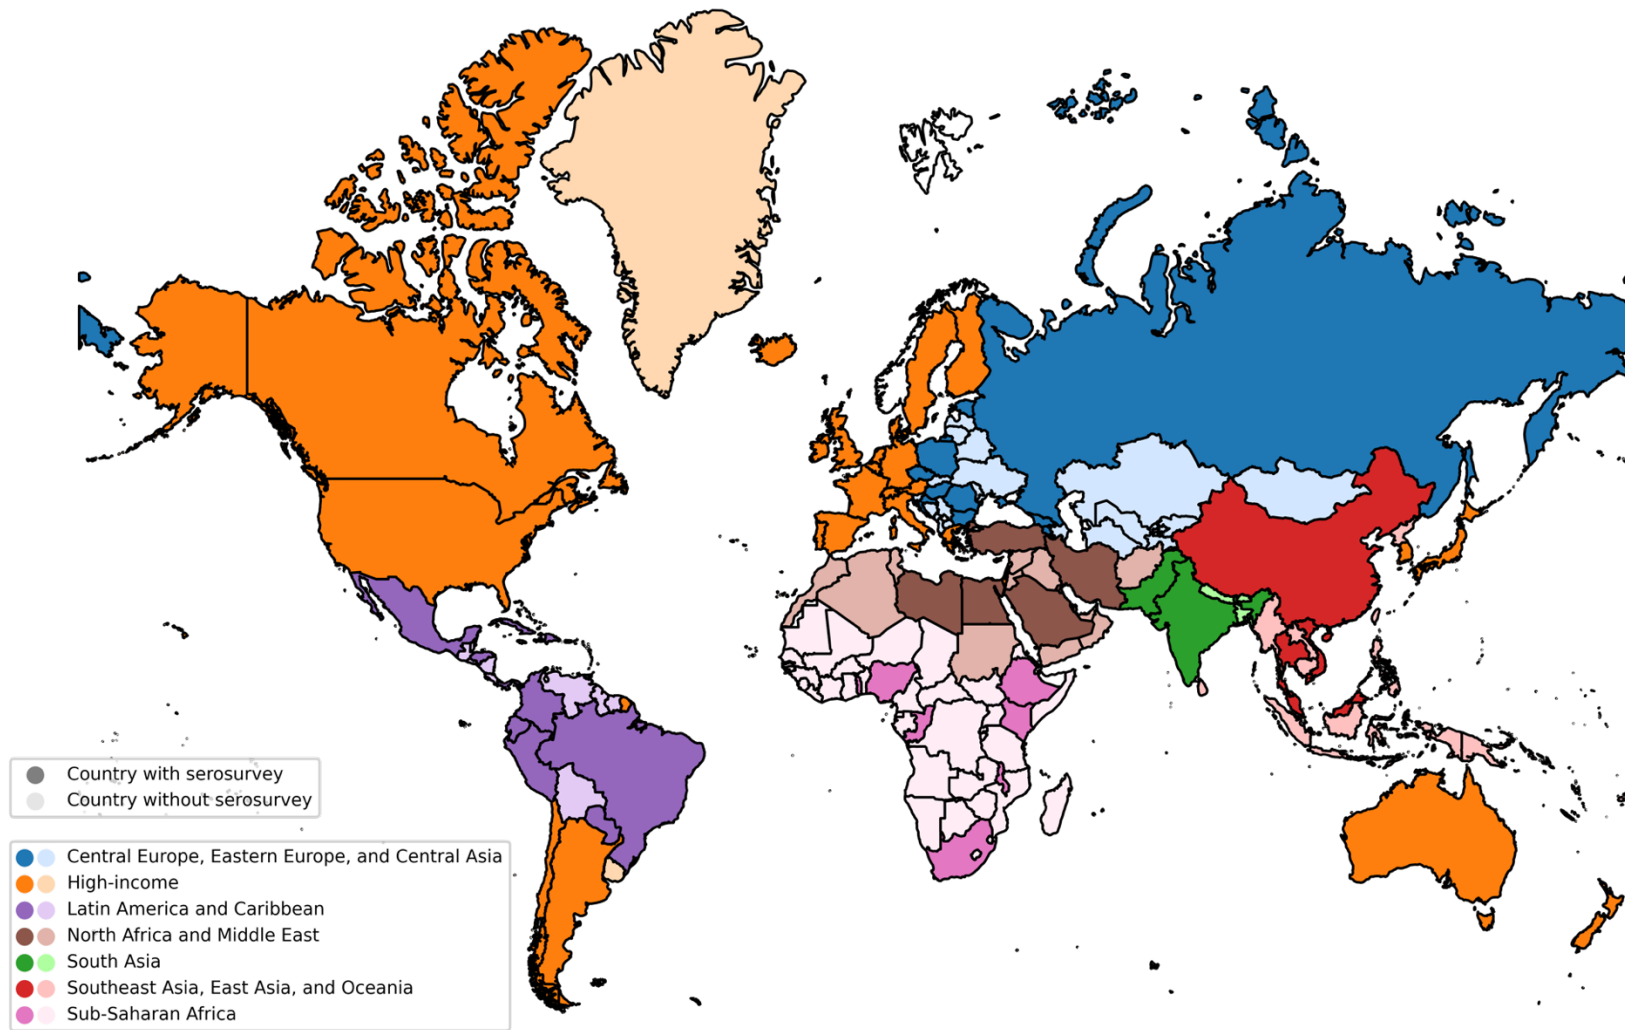

The number of countries reporting any serosurvey in each GBD region were: Central Europe, Eastern Europe, and Central Asia (n=26); in High Income regions (n=747); in Latin America and Caribbean (n=69); in North Africa and Middle East (n=21); in South Asia (n=49); in Southeast Asia, East Asia, and Oceania (n=46); and in Sub-Saharan Africa (n=10).

S2 Figure. Seroprevalence to cumulative case incidence ratios using cumulative incidence nine days prior to the serosurvey end date

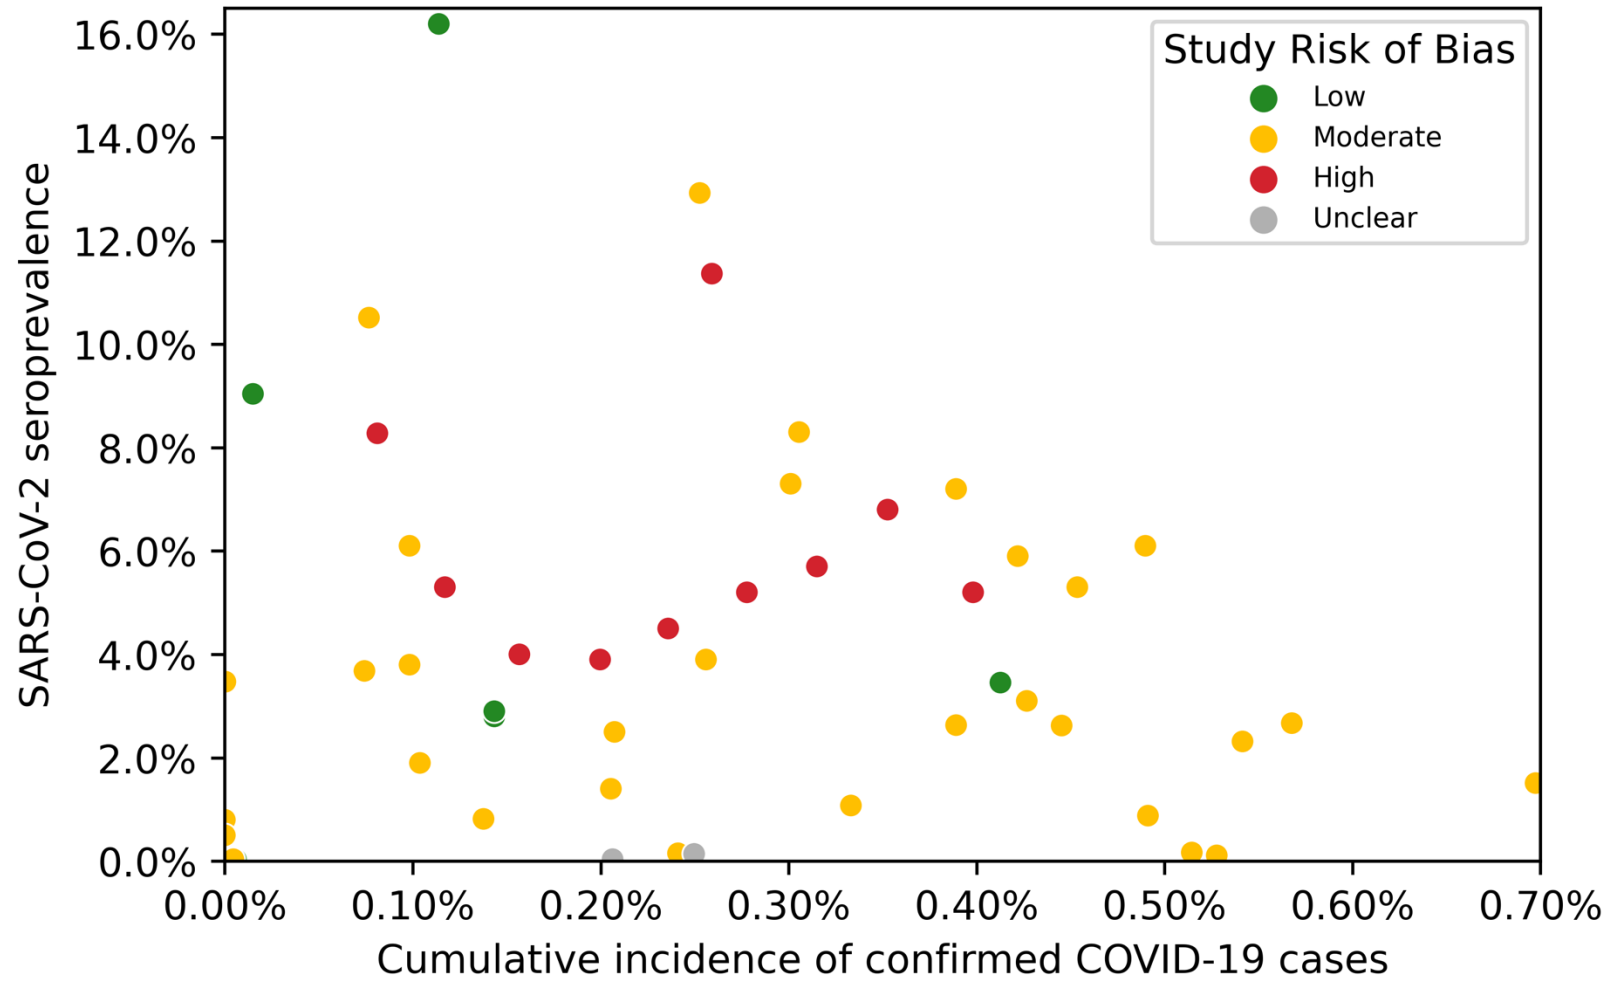

## References for all included studies

1. Grigoryan A. Antibodies found in Armenia's 61 medical workers from 380 examinations: Testing continues. Armen Press. 30 Jun 2020. Available: <https://armenpress.am/eng/news/1020040/>. Accessed 13 Mar 2021.
2. Tsaneva-Damyanova D. SARS-CoV-2: Seroepidemiological pattern in northeastern Bulgaria. *Biotechnology & Biotechnological Equipment*. 2020;34: 441–446. doi:10.1080/13102818.2020.1772105
3. Vince A, Zadro R, Šostar Z, Sternak SL, Vraneš J, Škaro V, et al. SARS-CoV-2 Seroprevalence in a Cohort of Asymptomatic, RT-PCR Negative Croatian First League Football Players. *medRxiv*. 2020; 2020.10.30.20223230. doi:10.1101/2020.10.30.20223230
4. Lapić I, Rogić D, Šegulja D, Kralik Oguić S, Knežević J. The reliability of SARS-CoV-2 IgG antibody testing - a pilot study in asymptomatic health care workers in a Croatian university hospital. *Croat Med J*. 2020;61: 485–490.
5. Vilibic-Cavlek T, Stevanovic V, Tabain I, Betica-Radic L, Sabadi D, Peric L, et al. Severe acute respiratory syndrome coronavirus 2 seroprevalence among personnel in the healthcare facilities of Croatia, 2020. *Revista da Sociedade Brasileira de Medicina Tropical*. 2020;53. doi:10.1590/0037-8682-0458-2020
6. Jerkovic I, Ljubic T, Basic Z, Kruzic I, Kunac N, Bezic J, et al. SARS-CoV-2 antibody seroprevalence in industry workers in Split-Dalmatia and Sibenik-Knin County, Croatia. *medRxiv*. 2020; 2020.05.11.20095158. doi:10.1101/2020.05.11.20095158
7. Bloomfield M, Pospisilova I, Cabelova T, Sediva A, Ibrahimova M, Borecka K, et al. Searching for COVID-19 Antibodies in Czech Children—A Needle in the Haystack. *Front Pediatr*. 2020;8. doi:10.3389/fped.2020.597736
8. Malickova K, Kratka Z, Luxova S, Bortlik M, Lukas M. Anti-SARS-CoV-2 antibody testing in IBD healthcare professionals: Are we currently able to provide COVID-free IBD clinics? *medRxiv*. 2020;55: 917–919. doi:10.1080/00365521.2020.1791244
9. Jõgi P, Soeorg H, Ingerainen D, Soots M, Lättekivi F, Naaber P, et al. Seroprevalence of SARS-CoV-2 IgG antibodies in two regions of Estonia (KoroSero-EST-1). 2020 [cited 15 May 2021]. doi:10.1101/2020.10.21.20216820
10. Veerus P, Salumets A, Naaber P, Krjutškov K, Tilk K, Laanpere M, et al. Seroprevalence of SARS-CoV-2 antibodies among pregnant women in Estonia: A call for epidemiological studies. *Acta Obstet Gynecol Scand*. 2020;99: 1736–1737. doi:10.1111/aogs.13995
11. Tsertsvadze T, Gatsrelia L, Mirziashvili M, Dvali N, Abutidze A, Metchurchlishvili R, et al. SARS-CoV-2 antibody seroprevalence in Tbilisi, the capital city of country of Georgia. *medRxiv*. 2020; 2020.09.18.20195024. doi:10.1101/2020.09.18.20195024
12. Merkely B, Szabó AJ, Kosztin A, Berényi E, Sebestyén A, Lengyel C, et al. Novel coronavirus epidemic in the Hungarian population, a cross-sectional nationwide survey to support the exit policy in Hungary. *GeroScience*. 2020;42: 1063–1074. doi:10.1007/s11357-020-00226-9
13. Ciechanowicz P, Dopytalska K, Mikucka-Wituszyńska A, Dźwigala M, Wiszniewski K, Herniczek W, et al. The prevalence of SARS-CoV-2 infection and the severity of the course of COVID-19 in patients with psoriasis treated with biologic therapy. *Journal of Dermatological Treatment*. 2020;0: 1–4. doi:10.1080/09546634.2020.1861177
14. Kasztelewicz B, Janiszewska K, Burzyńska J, Szydłowska E, Migdał M, Dzierżanowska-Fangrat K. Prevalence of IgG antibodies against SARS-CoV-2 among healthcare workers in a tertiary pediatric hospital in Poland. *medRxiv*. 2020; 2020.11.28.20239848. doi:10.1101/2020.11.28.20239848



15. Gujski M, Jankowski M, Pinkas J, Wierzba W, Samel-Kowalik P, Zaczyński A, et al. Prevalence of Current and Past SARS-CoV-2 Infections among Police Employees in Poland, June–July 2020. *Journal of Clinical Medicine*. 2020;9: 3245. doi:10.3390/jcm9103245
16. MedLife. Concluzii preliminare, studiu MedLife: “Cel mai probabil populatia nu are imunitate dobandita natural pentru COVID 19. Respectarea masurilor de protectie si extinderea testarii reprezinta sansa noastra de a functiona in siguranta si de a reporni economia”. MedLife; 24 Apr 2020. Available: <https://www.medlife.ro/comunicat-de-presa/concluzii-preliminare-studiu-medlife-cel-mai-probabil-populatia-nu-are-imunitate-dobandita-natural-pentru-covid-19-respectarea-masurilor-de-protectie-si-extinderea-testarii-reprezinta-sansa-noastra-de-a-functiona-in-siguranta-si-de-a>
17. Popova AYU, Ezhlova EB, Mel’nikova AA, Balakhonov SV, Chesnokova MV, Dubrovina VI, et al. Experience in Studying Seroprevalence to SARS-CoV-2 Virus in the Population of the Irkutsk Region during COVID-19 Outbreak. *Problemy Osobo Opasnykh Infektsii*. 2020; 106–113. doi:10.21055/0370-1069-2020-3-106-113
18. Popova AYU, Ezhlova EB, The Federal Service for Surveillance on Consumer Rights Protection and Human Wellbeing, Moscow, Russian Federation, Melnikova AA, The Federal Service for Surveillance on Consumer Rights Protection and Human Wellbeing, Moscow, Russian Federation, Mikailova OM, et al. The structure of seroprevalence to the SARS-CoV-2 virus among residents of the Moscow Region during the period of epidemic incidence of COVID-19. *Infekc bolezni*. 2020;18: 17–26. doi:10.20953/1729-9225-2020-4-17-26
19. Popova AYU, Ezhlova EB, Mel’nikova AA, Historik OA, Mosevich OS, Lyalina LV, et al. Assessment of the Herd Immunity to SARS-CoV-2 among the Population of the Leningrad Region during the COVID-19 Epidemic. *Problemy Osobo Opasnykh Infektsii*. 2020; 114–123. doi:10.21055/0370-1069-2020-3-114-123
20. Barchuk A, Skougarevskiy D, Titaev K, Shirokov D, Raskina Y, Novkunskaya A, et al. Seroprevalence of SARS-CoV-2 antibodies in Saint Petersburg, Russia: A population-based study. medRxiv. 2020; 2020.11.02.20221309. doi:10.1101/2020.11.02.20221309
21. Popova AYU, Ezhlova EB, Mel’nikova AA, Bashketova NS, Fridman RK, Lyalina LV, et al. Herd Immunity to SARS-CoV-2 among the Population in Saint-Petersburg during the COVID-19 Epidemic. *Problemy Osobo Opasnykh Infektsii*. 2020; 124–130. doi:10.21055/0370-1069-2020-3-124-130
22. Попова АЮ, Ежлова ЕБ, Мельникова АА, Степанова ТФ, Шаруха ГВ, Летушев АН, et al. Distribution of SARS-CoV-2 seroprevalence among residents of the Tyumen Region during the COVID-19 epidemic period. *Журнал микробиологии, эпидемиологии и иммунобиологии*. 2020 [cited 21 Mar 2021]. Available: <https://microbiol.elpub.ru/jour/article/view/890>
23. Tickle J. Large-scale antibody testing reveals that over 2 million Muscovites may already have contracted Covid-19. *Russian Times*. 26 Jun 2020. Available: <https://www.rt.com/russia/493055-moscow-mass-antibody-testing/>. Accessed 13 Mar 2021.
24. Krechetova L, Vtorushina V, Inviyaeva EV, Ivanets TYu, Donnikov AYU, Dolgushina NV, et al. Detection of antibodies to SARS-CoV-2 in healthcare professionals of the National Center during the COVID-19 pandemic (April–June 2020). *Obstetrics and Gynecology (Moscow)*. 2020;7: 122–128. doi:10.18565/aig.2020.7.122-128
25. Kiselyov S. 1 in 7 Russians Have ‘Coronavirus Immunity’ – Official. *The Moscow Times*. 10 Jun 2020. Available: <https://www.themoscowtimes.com/2020/06/10/1-in-7-russians-have-coronavirus-immunity-official-a70540>
26. Mass SARS-CoV-2 serological screening for the Principality of Andorra. 2020 [cited 16 Feb 2021]. doi:10.21203/rs.3.rs-119323/v1
27. Muñoz L, Pifano M, Bolzán A, Varela T, Comes Y, Specogna M, et al. Surveillance and Seroprevalence: Evaluation of IgG antibodies for SARS-Cov2 by ELISA in the popular neighborhood Villa Azul, Quilmes, province of Buenos Aires, Argentina. 2020 Aug. doi:10.1590/SciELOPreprints.1147

28. Silva AP, Fernanda Aguirre M, Ballejo C, Jimena Marro M, Gamarnik AV, Vargas G, et al. Seroprevalence of the SARS-CoV-2 infection in health workers of the Sanitary Region VIII, at province of Buenos Aires. medRxiv. 2020; 2020.09.07.20189050. doi:10.1101/2020.09.07.20189050
29. Figar S, Pagotto V, Luna L, Salto J, Wagner Manslau M, Mistchenko A, et al. Community-level SARS-CoV-2 Seroprevalence Survey in urban slum dwellers of Buenos Aires City, Argentina: A participatory research. medRxiv. 2020 [cited 13 Nov 2020]. doi:10.1101/2020.07.14.20153858
30. Insúa C, Stedile G, Figueroa V, Hernández C, Svartz A, Ferrero F, et al. Seroprevalence of SARS-CoV-2 antibodies among physicians from a children's hospital. Arch Argent Pediatr. 2020;118: 381–385. doi:10.5546/aap.2020.eng.381
31. Hicks SM, Pohl K, Neeman T, McNamara HA, Parsons KM, He J, et al. A Dual-Antigen Enzyme-Linked Immunosorbent Assay Allows the Assessment of Severe Acute Respiratory Syndrome Coronavirus 2 Antibody Seroprevalence in a Low-Transmission Setting. The Journal of Infectious Diseases. 2021;223: 10–14. doi:10.1093/infdis/jiaa623
32. Macartney K, Quinn HE, Pillsbury AJ, Koirala A, Deng L, Winkler N, et al. Transmission of SARS-CoV-2 in Australian educational settings: A prospective cohort study. The Lancet Child & Adolescent Health. 2020;4: 807–816. doi:10.1016/S2352-4642(20)30251-0
33. Ladage D, Höglinger Y, Ladage D, Adler C, Yalcin I, Braun RJ. SARS-CoV-2 antibody prevalence and symptoms in a local Austrian population. medRxiv. 2020 [cited 23 Feb 2021]. doi:doi.org/10.1101/2020.11.03.20219121
34. Fuereder T, Berghoff AS, Heller G, Haslacher H, Perkmann T, Strassl R, et al. SARS-CoV-2 seroprevalence in oncology healthcare professionals and patients with cancer at a tertiary care centre during the COVID-19 pandemic. ESMO Open. 2020;5. doi:10.1136/esmoopen-2020-000889
35. Hackner K, Errhalt P, Willheim M, Grasl M-A, Lagumdžija J, Riegler W, et al. Diagnostic accuracy of two commercially available rapid assays for detection of IgG and IgM antibodies to SARS-CoV-2 compared to ELISA in a low-prevalence population. Research Square. 2020 [cited 13 Nov 2020]. doi:10.21203/rs.3.rs-50887/v1
36. Knabl L, Mitra T, Kimpel J, Roessler A, Volland A, Walser A, et al. High SARS-CoV-2 Seroprevalence in Children and Adults in the Austrian Ski Resort Ischgl. medRxiv. 2020; 2020.08.20.20178533. doi:10.1101/2020.08.20.20178533
37. Wagner A, Guzek A, Ruff J, Jasinska J, Scheikl U, Zwazl I, et al. A longitudinal seroprevalence study in a large cohort of working adults reveals that neutralising SARS-CoV-2 RBD-specific antibodies persist for at least six months independent of the severity of symptoms. medRxiv. 2020; 2020.12.22.20248604. doi:10.1101/2020.12.22.20248604
38. Reiter T, Pajenda S, Wagner L, Gaggl M, Atamaniuk J, Holzer B, et al. Covid-19 serology in nephrology health care workers. medRxiv. 2020; 2020.07.21.20136218. doi:10.1101/2020.07.21.20136218
39. Orth-Höller D, Eigentler A, Weseslindtner L, Möst J. Antibody kinetics in primary- and secondary-care physicians with mild to moderate SARS-CoV-2 infection. Emerging Microbes & Infections. 2020;9: 1692–1694. doi:10.1080/22221751.2020.1793690
40. Duysburgh E, Mortgat L, Barbezange C, Dierick K, Fischer N, Heyndrickx L, et al. Persistence of IgG response to SARS-CoV-2. The Lancet Infectious Diseases. 2020;0. doi:10.1016/S1473-3099(20)30943-9
41. Herzog S, Bie JD, Abrams S, Wouters I, Ekinici E, Patteet L, et al. Seroprevalence of IgG antibodies against SARS coronavirus 2 in Belgium: A serial prospective cross-sectional nationwide study of residual samples. medRxiv. 2020; 2020.06.08.20125179. doi:10.1101/2020.06.08.20125179
42. Blairon L, Mokrane S, Wilmet A, Dessilly G, Kabamba-Mukadi B, Beukinga I, et al. Large-scale, molecular and serological SARS-CoV-2 screening of healthcare workers in a 4-site public hospital in Belgium after COVID-19 outbreak. Journal of Infection. 2020; S0163445320305144. doi:10.1016/j.jinf.2020.07.033

43. Berardis S, Verroken A, Vetillart A, Struyf C, Gilbert M, Gruson D, et al. SARS-CoV-2 seroprevalence in a Belgian cohort of patients with cystic fibrosis. *Journal of Cystic Fibrosis*. 2020; S1569199320308213. doi:10.1016/j.jcf.2020.08.005
44. Martin C, Montesinos I, Dauby N, Gilles C, Dahma H, Van Den Wijngaert S, et al. Dynamics of SARS-CoV-2 RT-PCR positivity and seroprevalence among high-risk healthcare workers and hospital staff. *Journal of Hospital Infection*. 2020;106: 102–106. doi:10.1016/j.jhin.2020.06.028
45. Steensels D, Oris E, Coninx L, Nuyens D, Delforge M-L, Vermeersch P, et al. Hospital-Wide SARS-CoV-2 Antibody Screening in 3056 Staff in a Tertiary Center in Belgium. *JAMA*. 2020. doi:10.1001/jama.2020.11160
46. Buntinx F, Claes P, Gulikers M, Verbakel J, Jan DL, Elst MV der, et al. Added value of anti-SARS-CoV-2 antibody testing in a Flemish nursing home during an acute COVID-19 outbreak in April 2020. *Acta Clinica Belgica*. 2020;0: 1–6. doi:10.1080/17843286.2020.1834285
47. Canadian Blood Services CBS. COVID-19 Seroprevalence Report 4 – January 12, 2021. 2021 Jan. Available: N/A
48. Canadian Blood Services CBS. COVID-19 Seroprevalence Report 3– December 18, 2020. 2020 Dec. Available: <https://www.covid19immunitytaskforce.ca/wp-content/uploads/2021/01/COVID-19-October-Report-for-CITF.pdf>
49. Manny E, Carroll A, Charlton C, Robinson J, Subbarao P, Azad MB, et al. Increased Mask Use and Fewer Gatherings Associated with Lower SARS-CoV-2 Seropositivity Among Young School-Age Children. *SSRN Journal*. 2020 [cited 15 May 2021]. doi:10.2139/ssrn.3728570
50. Brousseau N, Morin L, Ouakki M, Savard P, Quach C, Cheng M, et al. COVID-19 : Étude de séroprévalence chez des travailleurs de la santé de centres hospitaliers au Québec. *Institut National de Sante Publique du Quebec*; 2020 Nov p. 20.
51. Bolotin S, Tran V, Osman S, Brown KA, Buchan SA, Joh E, et al. SARS-CoV-2 Seroprevalence Survey Estimates Are Affected by Anti-Nucleocapsid Antibody Decline. *The Journal of Infectious Diseases*. 2021 [cited 22 Apr 2021]. doi:10.1093/infdis/jiaa796
52. Bardai G, Ouellet J, Engelhardt T, Bertolizio G, Wu Z, Rauch F. Prevalence of SARS-CoV-2 infections in a pediatric orthopedic hospital. von Ungern-Sternberg B, editor. *Pediatr Anaesth*. 2021;31: 247–248. doi:10.1111/pan.14047
53. Héma-Québec. Blood Donors Seroprevalence Study: 2.23% of Quebec Adults Contracted COVID-19. Héma-Québec; 5 Aug 2020. Available: <https://www.hema-quebec.qc.ca/publications/communiqués/archives/2020/communiqués-2020/etude-seroprevalence-resultats.en.html>
54. Majdoubi A, Michalski C, O’Connell SE, Dada S, Narpala S, Gelinias J, et al. Antibody reactivity to SARS-CoV-2 is common in unexposed adults and infants under 6 months. *medRxiv*. 2020; 2020.10.05.20206664. doi:10.1101/2020.10.05.20206664
55. Canadian Blood Services CBS. COVID-19 Seroprevalence Report 1– August 19, 2020. 2020 Aug. Available: [https://www.covid19immunitytaskforce.ca/wp-content/uploads/2020/09/COVID-19-Public-Report\\_2.pdf](https://www.covid19immunitytaskforce.ca/wp-content/uploads/2020/09/COVID-19-Public-Report_2.pdf)
56. Skowronski DM, Sekirov I, Sabaiduc S, Zou M, Morshed M, Lawrence D, et al. Low SARS-CoV-2 sero-prevalence based on anonymized residual sero-survey before and after first wave measures in British Columbia, Canada, March-May 2020. *medRxiv*. 2020; 2020.07.13.20153148. doi:10.1101/2020.07.13.20153148
57. Vijh R, Ghafari C, Hayden A, Schwandt M, Sekirov I, Morshed M, et al. Serological survey following SARS-COV-2 outbreaks at long-term care facilities in metro Vancouver, British Columbia: Implications for outbreak management and infection control policies. *Am J Infect Control*. 2020. doi:10.1016/j.ajic.2020.10.009
58. Torres JP, Piñera C, De La Maza V, Lagomarcino AJ, Simian D, Torres B, et al. Severe Acute Respiratory Syndrome Coronavirus 2 Antibody Prevalence in Blood in a Large School Community Subject to a Coronavirus Disease 2019 Outbreak: A Cross-sectional Study. *Clinical Infectious Diseases*. 2020; ciaa955. doi:10.1093/cid/ciaa955

59. Laursen J, Petersen J, Didriksen M, Iversen K, Ullum H. Prevalence of SARS-CoV-2 IgG/IgM Antibodies among Danish and Swedish Falek Emergency and Non-Emergency Healthcare Workers. *International Journal of Environmental Research and Public Health*. 2021;18: 923. doi:10.3390/ijerph18030923
60. Egerup P, Fich Olsen L, Christiansen A-MH, Westergaard D, Severinsen ER, Hviid KVR, et al. Severe Acute Respiratory Syndrome Coronavirus 2 (SARS-CoV-2) Antibodies at Delivery in Women, Partners, and Newborns. *Obstetrics & Gynecology*. 2021;137: 49–55. doi:10.1097/AOG.0000000000004199
61. Jespersen S, Mikkelsen S, Greve T, Kaspersen KA, Tolstrup M, Boldsen JK, et al. Severe Acute Respiratory Syndrome Coronavirus 2 Seroprevalence Survey Among 17 971 Healthcare and Administrative Personnel at Hospitals, Prehospital Services, and Specialist Practitioners in the Central Denmark Region. *Clinical Infectious Diseases*. 2020; ciaa1471. doi:10.1093/cid/ciaa1471
62. Pedersen OB, Nissen J, Dinh KM, Schwinn M, Kaspersen KA, Boldsen JK, et al. Severe Acute Respiratory Syndrome Coronavirus 2 (SARS-CoV-2) Infection Fatality Rate Among Elderly Danes: A Cross-sectional Study on Retired Blood Donors. *Clinical Infectious Diseases*. 2020 [cited 12 Jan 2021]. doi:10.1093/cid/ciaa1627
63. Storgaard SF, Eiset AH, Abdullahi F, Wejse C. First wave of COVID-19 did not reach the homeless population in Aarhus. *Dan Med J*. 2020;67.
64. la Cour Freiesleben N, Egerup P, Hviid KVR, Severinsen ER, Kolte AM, Westergaard D, et al. SARS-CoV-2 in first trimester pregnancy: A cohort study. *Human Reproduction*. 2020; deaa311. doi:10.1093/humrep/deaa311
65. Erikstrup C, Hother CE, Pedersen OBV, Mølbak K, Skov RL, Holm DK, et al. Estimation of SARS-CoV-2 infection fatality rate by real-time antibody screening of blood donors. *medRxiv*. 2020; 2020.04.24.20075291. doi:10.1101/2020.04.24.20075291
66. Iversen K, Bundgaard H, Hasselbalch RB, Kristensen JH, Nielsen PB, Pries-Heje M, et al. Risk of COVID-19 in health-care workers in Denmark: An observational cohort study. *Lancet Infect Dis*. 2020. doi:10.1016/S1473-3099(20)30589-2
67. Petersen MS, Strøm M, Christiansen DH, Fjallsbak JP, Eliassen EH, Johansen M, et al. Seroprevalence of SARS-CoV-2–Specific Antibodies, Faroe Islands. *Emerg Infect Dis*. 2020;26: 2760–2762. doi:10.3201/eid2611.202736
68. Kantele A, Lääveri T, Kareinen L, Pakkanen SH, Blomgren K, Mero S, et al. SARS-CoV-2 infections among healthcare workers at Helsinki University Hospital, Finland, spring 2020: Serosurvey, symptoms and risk factors. *Travel Medicine and Infectious Disease*. 2021;39: 101949. doi:10.1016/j.tmaid.2020.101949
69. Anna F, Goyard S, Lalanne AI, Nevo F, Gransagne M, Souque P, et al. High seroprevalence but short-lived immune response to SARS-CoV-2 infection in Paris. *European Journal of Immunology*. 2020;51: 180–190. doi:10.1002/eji.202049058
70. Dimeglio C, Herin F, Miedougé M, Cambus J-P, Abravanel F, Mansuy J-M, et al. Screening for SARS-CoV-2 antibodies among healthcare workers in a university hospital in southern France. *Journal of Infection*. 2020;0. doi:10.1016/j.jinf.2020.09.035
71. Roederer T, Mollo B, Vincent C, Nikolay B, Llosa AE, Nesbitt R, et al. Seroprevalence and risk factors of exposure to COVID-19 in homeless people in Paris, France: A cross-sectional study. *Lancet Public Health*. 2021. doi:10.1016/S2468-2667(21)00001-3
72. Péré H, Wack M, Védie B, Demory Guinet N, Kassis Chikani N, Janot L, et al. Sequential SARS-CoV-2 IgG assays as confirmatory strategy to confirm equivocal results: Hospital-wide antibody screening in 3,569 staff health care workers in Paris. *Journal of Clinical Virology*. 2020;132: 104617. doi:10.1016/j.jcv.2020.104617
73. Tsatsaris V, Mariaggi A-A, Launay O, Couffignal C, Rousseau J, Ancel PY, et al. SARS-COV-2 IgG antibody response in pregnant women at delivery. *Journal of Gynecology Obstetrics and Human Reproduction*. 2020;50: 102041. doi:10.1016/j.jogoh.2020.102041

74. Gallais F, Velay A, Nazon C, Wendling M-J, Partisani M, Sibilia J, et al. Intrafamilial Exposure to SARS-CoV-2 Associated with Cellular Immune Response without Seroconversion, France - Volume 27, Number 1—January 2021 - Emerging Infectious Diseases journal - CDC. Emerging Infectious Diseases. 2020 [cited 23 Jan 2021]. doi:10.3201/eid2701.203611
75. Carrat F, Lamballerie X de, Rahib D, Blanche H, Lapidus N, Artaud F, et al. Seroprevalence of SARS-CoV-2 among adults in three regions of France following the lockdown and associated risk factors: A multicohort study. medRxiv. 2020; 2020.09.16.20195693. doi:10.1101/2020.09.16.20195693
76. Mesnil M, Joubel K, Yavchitz A, Miklaszewski N, Devys J-M. Seroprevalence of SARS-Cov-2 in 646 professionals at the Rothschild Foundation Hospital (ProSeCoV study). Anaesthesia Critical Care & Pain Medicine. 2020;39: 595–596. doi:10.1016/j.accpm.2020.08.003
77. Delmas C, Plu-Bureau G, Canoui E, Mouthon L, Meritet J-F. Clinical characteristics and persistence of severe acute respiratory coronavirus virus 2 (SARS-CoV-2) IgG antibodies in 4,607 French healthcare workers: Comparison with European countries. Infect Control Hosp Epidemiol. 2020; 1–2. doi:10.1017/ice.2020.1309
78. Capai L, Ayhan N, Masse S, Canarelli J, Priet S, Simeoni M-H, et al. Seroprevalence of SARS-CoV-2 IgG Antibodies in Corsica (France), April and June 2020. Journal of Clinical Medicine. 2020;9: 3569. doi:10.3390/jcm9113569
79. Mattern J, Vauloup-Fellous C, Zakaria H, Benachi A, Carrara J, Letourneau A, et al. Post lockdown COVID-19 seroprevalence and circulation at the time of delivery, France. PLOS ONE. 2020;15: e0240782. doi:10.1371/journal.pone.0240782
80. Bal A, Brengel-Pesce K, Gaymard A, Quéromès G, Guibert N, Frobert E, et al. Clinical and microbiological assessments of COVID-19 in healthcare workers: A prospective longitudinal study. medRxiv. 2020; 2020.11.04.20225862. doi:10.1101/2020.11.04.20225862
81. Vu SL, Jones G, Anna F, Rose T, Richard J-B, Bernard-Stoecklin S, et al. Prevalence of SARS-CoV-2 antibodies in France: Results from nationwide serological surveillance. medRxiv. 2020 [cited 8 Mar 2021]. doi:doi.org/10.1101/2020.10.20.20213116
82. Cohen R, Jung C, Ouldali N, Sellam A, Batard C, Cahn-Sellem F, et al. Assessment of SARS-CoV-2 infection by Reverse transcription-PCR and serology in the Paris area: A cross-sectional study. BMJ Paediatrics Open. 2020;4: e000887. doi:10.1136/bmjpo-2020-000887
83. Fumery M, Matias C, Brochot E. Seroconversion of Immunoglobulins to SARS-CoV2 in Patients With Inflammatory Bowel Disease Patients Treated by Biologics. Journal of Crohn's and Colitis. 2020; jjaa154. doi:10.1093/ecco-jcc/jjaa154
84. Fontanet A, Grant R, Tondeur L, Madec Y, Grzelak L, Cailleau I, et al. SARS-CoV-2 infection in primary schools in northern France: A retrospective cohort study in an area of high transmission. medRxiv. 2020; 2020.06.25.20140178. doi:10.1101/2020.06.25.20140178
85. Solodky ML, Galvez C, Russias B, Detourbet P, N'Guyen-Bonin V, Herr A-L, et al. Lower detection rates of SARS-COV2 antibodies in cancer patients versus health care workers after symptomatic COVID-19. Annals of Oncology. 2020;31: 1087–1088. doi:10.1016/j.annonc.2020.04.475
86. Gallian P, Pastorino B, Morel P, Chiaroni J, Ninove L, de Lamballerie X. Lower prevalence of antibodies neutralizing SARS-CoV-2 in group O French blood donors. Antiviral Research. 2020;181: 104880. doi:10.1016/j.antiviral.2020.104880
87. Grzelak L, Temmam S, Planchais C, Demeret C, Tondeur L, Huon C, et al. A comparison of four serological assays for detecting anti-SARS-CoV-2 antibodies in human serum samples from different populations. Science Translational Medicine. 2020;12: eabc3103. doi:10.1126/scitranslmed.abc3103

88. Germain N, Herwegh S, Hatzfeld A-S, Bocket L, Prévost B, Danzé P-M, et al. Retrospective study of COVID-19 seroprevalence among tissue donors at the onset of the outbreak before implementation of strict lockdown measures in France. *Cell Tissue Bank*. 2021 [cited 19 Mar 2021]. doi:10.1007/s10561-021-09901-3
89. Fuest C, Neumeier F, Peichl A, Universitätsmedizin Berlin C -, Sozialforschung und statistische Analysen mbH FG für, GmbH PHS. Die Deutschen und Corona. ifo Institut; 2020 Nov. Available: <https://www.ifo.de/en/publikationen/2020/monograph-authorship/die-deutschen-und-corona>
90. Institute RK. Serological tests of blood donations for antibodies against SARS-CoV-2 (SeBluCo study). 2020 Nov. Available: [https://www.rki.de/DE/Content/InfAZ/N/Neuartiges\\_Coronavirus/Projekte\\_RKI/SeBluCo\\_Zwischenbericht.html;jsessionid=0C30892A66A0F7CDD897F3809AA3F10F.internet102](https://www.rki.de/DE/Content/InfAZ/N/Neuartiges_Coronavirus/Projekte_RKI/SeBluCo_Zwischenbericht.html;jsessionid=0C30892A66A0F7CDD897F3809AA3F10F.internet102)
91. Armann JP, Unrath M, Kirsten C, Lück C, Dalpke AH, Berner R. SARS-CoV-2 IgG antibodies in adolescent students and their teachers in Saxony, Germany (SchoolCoviDD19): Persistent low seroprevalence and transmission rates between May and October 2020. *medRxiv*. 2020; 2020.07.16.20155143. doi:10.1101/2020.07.16.20155143
92. Thielecke M, Theuring S, Loon W van, Hommes F, Mall MA, Rosen A, et al. SARS-CoV-2 infections in kindergartens and associated households at the start of the second wave in Berlin, Germany – a cross sectional study. *medRxiv*. 2020; 2020.12.08.20245910. doi:10.1101/2020.12.08.20245910
93. Schwarz S, Jenetzky E, Krafft H, Maurer T, Steuber C, Reckert T, et al. Corona bei Kindern: Die Co-Ki Studie: Relevanz von SARS-CoV-2 in der ambulanten pädiatrischen Versorgung in Deutschland. *Monatsschr Kinderheilkd*. 2020;169: 39–45. doi:10.1007/s00112-020-01050-3
94. Rauber C, Tiwari-Heckler S, Pfeiffenberger J, Mehrabi A, Lund F, Gath P, et al. SARS-CoV-2 Seroprevalence and Clinical Features of COVID-19 in a German Liver Transplant Recipient Cohort: A Prospective Serosurvey Study. *Transplant Proc*. 2020. doi:10.1016/j.transproceed.2020.11.009
95. Hoffmann S, Spallek J, Heinz-Detlef G, Schiebel J, Hufert F. Testing the backbone of the healthcare system: A prospective serological-epidemiological cohort study of healthcare workers in rural Germany. *Research Square*. 2020 [cited 15 Jan 2021]. doi:10.21203/rs.3.rs-84703/v1
96. Finkenzeller T, Faltlhauser A, Dietl K-H, Paetzel C, Szczypien N, Klawonn F, et al. SARS-CoV-2-Antikörper bei Intensiv- und Klinikpersonal. *Med Klin Intensivmed Notfmed*. 2020;115: 139–145. doi:10.1007/s00063-020-00761-5
97. Laub O, Leipold G, Toncheva A, Peterhoff D, Einhauser S, Borchers N, et al. Coronavirus antibody screening identifies children with mild to moderate courses of PMIS. *Preprints*; 2020 Dec. doi:10.22541/au.160776187.78854537/v1
98. Brehm T, Schwinge D, Lampalzer S, Schlicker V, Küchen J, Thompson M, et al. Seroprevalence of SARS-CoV-2 antibodies among hospital workers in a German tertiary care center: A sequential follow-up study. *International Journal of Hygiene and Environmental Health*. 2021;232: 113671. doi:10.1016/j.ijheh.2020.113671
99. Mack D, Gärtner BC, Rössler A, Kimpel J, Donde K, Harzer O, et al. Prevalence of SARS-CoV-2 IgG antibodies in a large prospective cohort study of elite football players in Germany (May–June 2020): Implications for a testing protocol in asymptomatic individuals and estimation of the rate of undetected cases. *Clinical Microbiology and Infection*. 2020;27: 473.e1–473.e4. doi:10.1016/j.cmi.2020.11.033
100. Epstude J, Harsch IA. Seroprevalence of COVID-19 antibodies in the cleaning and oncological staff of a municipal clinic. *GMS Hygiene and Infection Control*; 15:Doc18. 2020 [cited 15 Oct 2020]. doi:10.3205/DGKH000353
101. Aziz NA, Corman VM, Echterhoff AKC, Richter A, Schmandke A, Schmidt ML, et al. Seroprevalence and correlates of SARS-CoV-2 neutralizing antibodies: Results from a population-based study in Bonn, Germany. *medRxiv*. 2020; 2020.08.24.20181206. doi:10.1101/2020.08.24.20181206

102. Bahrs C, Kimmig A, Weis S, Ankert J, Hagel S, Maschmann J, et al. Seroprevalence of SARS CoV-2 antibodies in healthcare workers and administration employees: A prospective surveillance study at a 1,400-bed university hospital in Germany. medRxiv. 2020 [cited 18 Feb 2021]. doi:10.1101/2020.09.29.20203737
103. Herzberg J, Vollmer T, Fischer B, Becher H, Becker A-K, Sahly H, et al. Prospective Sero-epidemiological Evaluation of SARS-CoV-2 among Health Care Workers in a German Secondary Care Hospital. *International Journal of Infectious Diseases*. 2021;102: 136–143. doi:10.1016/j.ijid.2020.10.026
104. Runkel S, Kowalzik F, Gehring S, Winter J, Grandt CL, Marron M, et al. Prevalence of Severe Acute Respiratory Syndrome Coronavirus-2-specific Antibodies in German Blood Donors during the COVID-19 Pandemic. *Clin Lab*. 2020;66. doi:10.7754/Clin.Lab.2020.200915
105. Santos-Hövenner C, Neuhauser HK, Rosario AS, Busch M, Schlaud M, Hoffmann R, et al. Serology- and PCR-based cumulative incidence of SARS-CoV-2 infection in adults in a successfully contained early hotspot (CoMoLo study), Germany, May to June 2020. *Eurosurveillance*. 2020;25: 2001752. doi:10.2807/1560-7917.ES.2020.25.47.2001752
106. Fill Malfertheiner S, Brandstetter S, Roth S, Harner S, Buntrock-Döpke H, Toncheva AA, et al. Immune response to SARS-CoV-2 in health care workers following a COVID-19 outbreak: A prospective longitudinal study. *Journal of Clinical Virology*. 2020;130: 104575. doi:10.1016/j.jcv.2020.104575
107. Herrmann BL. Die Prävalenz von SARS-CoV-2-IgG-AK liegt bei 1,2%: Screening bei asymptomatischen ambulanten Patienten. *MMW - Fortschritte der Medizin*. 2020;162: 44–46. doi:10.1007/s15006-020-0750-y
108. Fischer B, Knabbe C, Vollmer T. SARS-CoV-2 IgG seroprevalence in blood donors located in three different federal states, Germany, March to June 2020. *Eurosurveillance*. 2020;25. doi:10.2807/1560-7917.ES.2020.25.28.2001285
109. Thieme CJ, Zgoura P, Todorova I, Babel D, Witzke O, Viebahn R, et al. Coronavirus Disease 2019 Associated Risk Score, Behavior, and Symptom Prevalence in German Transplant Recipients. *Transplant Proc*. 2020 [cited 6 Feb 2021]. doi:10.1016/j.transproceed.2020.12.001
110. Erber J, Kappler V, Haller B, Mijočević H, Galhoz A, da Costa CP, et al. Strategies for infection control and prevalence of anti-SARS-CoV-2 IgG in 4,554 employees of a university hospital in Munich, Germany. 2020 [cited 15 May 2021]. doi:10.1101/2020.10.04.20206136
111. Weis S, Scherag A, Baier M, Kiehntopf M, Kamradt T, Kolanos S, et al. Seroprevalence of SARS-CoV-2 antibodies in an entirely PCR- sampled and quarantined community after a COVID-19 outbreak - the CoNAN study. medRxiv. 2020; 21. Available: <https://doi.org/10.1101/2020.07.15.20154112>
112. Choi M, Bachmann F, Naik MG, Duettmann W, Duerr M, Zukunft B, et al. Low Seroprevalence of SARS-CoV-2 Antibodies during Systematic Antibody Screening and Serum Responses in Patients after COVID-19 in a German Transplant Center. *JCM*. 2020;9: 3401. doi:10.3390/jcm9113401
113. Weis S, Scherag A, Baier M, Kiehntopf M, Kamradt T, Kolanos S, et al. Antibody response using six different serological assays in a completely PCR-tested community after a coronavirus disease 2019 outbreak—the CoNAN study. *Clinical Microbiology and Infection*. 2020;27: 470.e1–470.e9. doi:10.1016/j.cmi.2020.11.009
114. Neumann J, Zeeb H, Dotzauer A, Janssen-Weets O. Low anti-SARS-CoV-2 seroprevalence among public sector employees in Bremen. *Zeitschrift für medizinische Prävention*. 2020;55: 515–516. Available: <https://www.asu-arbeitsmedizin.com/node/153868/print>
115. Tönshoff B, Müller B, Elling R, Renk H, Meissner P, Hengel H, et al. Prevalence of SARS-CoV-2 Infection in Children and Their Parents in Southwest Germany. *JAMA Pediatrics*. 2021 [cited 15 May 2021]. doi:10.1001/jamapediatrics.2021.0001
116. Zöllkau J, Baier M, Scherag A, Schleußner E, Groten T. Periodenprävalenz von SARS-CoV-2 in einer unselektierten Stichprobe schwangerer Frauen in Jena, Thüringen. *Z Geburtshilfe Neonatol*. 2020;224: 194–198. doi:10.1055/a-1206-1033

117. Schmidt SB, Grüter L, Boltzmann M, Rollnik JD. Prevalence of serum IgG antibodies against SARS-CoV-2 among clinic staff. Adrish M, editor. PLoS ONE. 2020;15: e0235417. doi:10.1371/journal.pone.0235417
118. Reisinger EC, von Possel R, Warnke P, Geerdes-Fenge HF, Hemmer CJ, Pfefferle S, et al. [Screening of Mothers in a COVID-19 Low-Prevalence Region: Determination of SARS-CoV-2 Antibodies in 401 Mothers from Rostock by ELISA and Confirmation by Immunofluorescence]. Dtsch Med Wochenschr. 2020. doi:10.1055/a-1197-4293
119. Korth J, Wilde B, Dolff S, Anastasiou OE, Krawczyk A, Jahn M, et al. SARS-CoV-2-specific antibody detection in healthcare workers in Germany with direct contact to COVID-19 patients. Journal of Clinical Virology. 2020;128: 104437. doi:10.1016/j.jcv.2020.104437
120. Harsch IA, Skiba M, Konturek PC, Epstude J. Prevalence of antibodies against COVID-19 in the staff of a COVID-19 regular ward. GMS Hyg Infect Control. 2020;15. doi:10.3205/dgkh000344
121. Behrens GMN, Cossmann A, Stankov MV, Schulte B, Streeck H, Förster R, et al. Strategic Anti-SARS-CoV-2 Serology Testing in a Low Prevalence Setting: The COVID-19 Contact (CoCo) Study in Healthcare Professionals. Infect Dis Ther. 2020 [cited 13 Nov 2020]. doi:10.1007/s40121-020-00334-1
122. Kern PM, Müller H-H, Menzel T, Weisser H. Studie zur Immunität gegen SARS-CoV-2: Keine signifikante humorale Immunität gegen SARS-CoV-2 im medizinischen Personal eines Klinikums der Maximalversorgung und in der Stadtregion Fulda. Der Klinikarzt. 2020;49: 268–273. doi:10.1055/a-1198-1243
123. Kraehling V, Kern M, Halwe S, Mueller H, Rohde C, Savini M, et al. Epidemiological study to detect active SARS-CoV-2 infections and seropositive persons in a selected cohort of employees in the Frankfurt am Main metropolitan area. medRxiv. 2020; 2020.05.20.20107730. doi:10.1101/2020.05.20.20107730
124. Lackermair K, William F, Grzanna N, Lehmann E, Fichtner S, Kucher HB, et al. Infection with SARS-CoV-2 in primary care health care workers assessed by antibody testing. Family Practice. 2020; cmaa078. doi:10.1093/fampra/maa078
125. Streeck H, Schulte B, Kümmerer BM, Richter E, Höller T, Fuhrmann C, et al. Infection fatality rate of SARS-CoV2 in a super-spreading event in Germany. Nat Commun. 2020;11: 5829. doi:10.1038/s41467-020-19509-y
126. Tsitsilonis OE, Paraskevis D, Lianidou E, Pierros V, Akalestos A, Kastitis E, et al. Seroprevalence of Antibodies against SARS-CoV-2 among the Personnel and Students of the National and Kapodistrian University of Athens, Greece: A Preliminary Report. Life. 2020;10: 214. doi:10.3390/life10090214
127. Psychogiou M, Karabinis A, Pavlopoulou ID, Basoulis D, Petsios K, Roussos S, et al. Antibodies against SARS-CoV-2 among health care workers in a country with low burden of COVID-19. PLOS ONE. 2020;15: e0243025. doi:10.1371/journal.pone.0243025
128. Vlachoyiannopoulos P, Alexopoulos H, Apostolidi I, Bitzogli K, Barba C, Athanasopoulou E, et al. Anti-SARS-CoV-2 antibody detection in healthcare workers of two tertiary hospitals in Athens, Greece. Clinical Immunology. 2020;221: 108619. doi:10.1016/j.clim.2020.108619
129. Bogogiannidou Z, Vontas A, Dadouli K, Kyritsi MA, Soteriades S, Nikoulis DJ, et al. Repeated leftover serosurvey of SARS-CoV-2 IgG antibodies, Greece, March and April 2020. Eurosurveillance. 2020;25: 2001369. doi:10.2807/1560-7917.ES.2020.25.31.2001369
130. Gudbjartsson DF, Norddahl GL, Melsted P, Gunnarsdottir K, Holm H, Eythorsson E, et al. Humoral Immune Response to SARS-CoV-2 in Iceland. N Engl J Med. 2020;383: 1724–1734. doi:10.1056/NEJMoa2026116
131. Derval Igoe, Janice Bailie, Fiona O’Callaghan, Aoife Colgan, Jeff Connell, Paul Crowley, et al. Preliminary report of the results of the Study to Investigate COVID-19 Infection in People Living in Ireland (SCOPI): A national seroprevalence study, June-July 2020. Health Protection Surveillance Centre; 2020 Aug p. 9. Available: <https://www.hpsc.ie/a-z/respiratory/coronavirus/novelcoronavirus/scopi/SCOPI>



132. Antibody tests show a third in Israeli ultra-Orthodox hot spot had coronavirus. Haaretz.com; [cited 23 Apr 2021]. Available: <https://www.haaretz.com/israel-news/.premium-antibody-tests-30-percent-of-bnei-brak-residents-have-been-infected-with-covid-1.9217689>
133. Efrati I. Up to 270000 Israelis Had Coronavirus, New Study Concludes. Haaretz. 2 Jun 2020. Available: <https://www.haaretz.com/israel-news/.premium-up-to-270-000-israelis-had-coronavirus-new-study-concludes-1.8888435>. Accessed 13 Mar 2021.
134. Caponigro G, Fusco O, Pastorini A, Deligiannis P, Maiolani M, Cubeddu A, et al. RAPID SEROLOGICAL TEST IN THE COVID-19 ERA: OUR EXPERIENCE. *Tumori Journal*. 2020;106: 1–215. doi:10.1177/0300891620953388
135. Russo A, Calò F, Fraia AD, Starace M, Minichini C, Gentile V, et al. Assessment and Comparison of Two Serological Approaches for the Surveillance of Health Workers Exposed to SARS-CoV-2. *Infection and Drug Resistance*; 17 Dec 2020 [cited 1 Feb 2021]. doi:10.2147/IDR.S282652
136. Ralli M, Cedola C, Urbano S, Latini O, Shkodina N, Morrone A, et al. Assessment of SARS-CoV-2 infection through rapid serology testing in the homeless population in the City of Rome, Italy. Preliminary results. *Journal of Public Health Research*. 2020;9. doi:10.4081/jpshr.2020.1986
137. Ministero della Salute. Covid-19, illustrati i risultati dell'indagine di sieroprevalenza. 2020 Aug. Available: <https://www.salute.gov.it/portale/nuovocoronavirus/dettaglioNotizieNuovoCoronavirus.jsp?lingua=italiano&menu=notizie&p=dalministero&id=4998>
138. Norsa L, Cosimo P, Indriolo A, Sansotta N, D'Antiga L, Callegaro A. Asymptomatic Severe Acute Respiratory Syndrome Coronavirus 2 Infection in Patients With Inflammatory Bowel Disease Under Biologic Treatment. *Gastroenterology*. 2020; S0016508520351179. doi:10.1053/j.gastro.2020.08.046
139. Cento V, Alteri C, Merli M, Di Ruscio F, Tartaglione L, Rossotti R, et al. Effectiveness of infection-containment measures on SARS-CoV-2 seroprevalence and circulation from May to July 2020, in Milan, Italy. Jin D-Y, editor. *PLoS ONE*. 2020;15: e0242765. doi:10.1371/journal.pone.0242765
140. Medas F, Cappellacci F, Anedda G, Canu GL, Del Giacco S, Calò PG, et al. Seroprevalence of SARS-Cov-2 in the setting of a non-dedicated COVID-19 hospital in a low CoV-2 incidence area: Implications for surgery. *Annals of Medicine and Surgery*. 2020;60: 261–262. doi:10.1016/j.amsu.2020.11.006
141. Berte' R, Mazza S, Stefanucci MR, Noviello D, Costa S, Ciafardini C, et al. Seroprevalence of SARS-CoV2 in IBD Patients Treated with Biologic Therapy. *Journal of Crohn's and Colitis*. 2020; jjaa237. doi:10.1093/ecco-jcc/jjaa237
142. Capasso N, Palladino R, Montella E, Pennino F, Lanzillo R, Carotenuto A, et al. Prevalence of SARS-CoV-2 Antibodies in Multiple Sclerosis: The Hidden Part of the Iceberg. *JCM*. 2020;9: 4066. doi:10.3390/jcm9124066
143. Gabriele Pagani, Federico Conti, Andrea Giacomelli, Dario Bernacchia, Rossana Rondanin, Andrea Prina, et al. Seroprevalence of SARS-CoV-2 IgG significantly varies with age: Results from a mass 7 population screening (SARS-2-SCREEN-CdA). 2020 Jun. Available: <https://www.medrxiv.org/content/10.1101/2020.06.24.20138875v1.full.pdf>
144. Cosma S, Borella F, Carosso A, Sciarrone A, Cusato J, Corcione S, et al. The “scar” of a pandemic: Cumulative incidence of COVID-19 during the first trimester of pregnancy. *J Med Virol*. 2020; jmv.26267. doi:10.1002/jmv.26267
145. Angelo Amante. Over half of people tested in Italy's Bergamo have COVID-19 antibodies. *The Jakarta Post*. 9 Jun 2020. Available: <https://www.thejakartapost.com/news/2020/06/09/over-half-of-people-tested-in-italys-bergamo-have-covid-19-antibodies.html>
146. Lorenzo D, Carrisi C. COVID-19 exposure risk for family members of healthcare workers: An observational study. *International Journal of Infectious Diseases*. 2020;98: 287–289. doi:10.1016/j.ijid.2020.06.106

147. Lastrucci V, Lorini C, Del Riccio M, Gori E, Chiesi F, Sartor G, et al. SARS-CoV-2 Seroprevalence Survey in People Involved in Different Essential Activities during the General Lock-Down Phase in the Province of Prato (Tuscany, Italy). *Vaccines*. 2020;8: 778. doi:10.3390/vaccines8040778
148. Papalini C, Paciosi F, Schiaroli E, Pierucci S, Busti C, Bozza S, et al. Seroprevalence of anti SARS-CoV2 antibodies in Umbrian persons living with HIV: SARS-CoV-2 and HIV. *Mediterr J Hematol Infect Dis*. 2020;12: e2020080. doi:10.4084/mjihid.2020.080
149. Fiore JR, Centra M, De Carlo A, Granato T, Rosa A, Sarno M, et al. Results from a survey in healthy blood donors in South Eastern Italy indicate that we are far away from herd immunity to SARS-CoV-2. *J Med Virol*. 2020; jmv.26425. doi:10.1002/jmv.26425
150. Sperotto A, Candoni A, Petruzzellis G, Mullai R, Patriarca F, Tascini C, et al. Screening procedure for SARS-CoV-2 infection combining triage, nasopharyngeal swab and serological test in allogeneic stem cell transplantation recipients undergoing outpatient posttransplant follow-up. *J Med Virol*. 2020;93: 1244–1246. doi:10.1002/jmv.26586
151. Stellato P, Granata A, De Matteo A, Capelli C, Paparo M, Parasole R, et al. Successful management plan of COVID-19 in a pediatric hemato-oncology department: A single-centre experience. *bmjpo*. 2020;4: e000818. doi:10.1136/bmjpo-2020-000818
152. Plebani M, Padoan A, Fedeli U, Schievano E, Vecchiato E, Lippi G, et al. SARS-CoV-2 serosurvey in health care workers of the Veneto Region. *Clinical Chemistry and Laboratory Medicine (CCLM)*. 2020;58: 2107–2111. doi:10.1515/cclm-2020-1236
153. Poletti P, Tirani M, Cereda D, Trentini F, Guzzetta G, Marziano V, et al. Age-specific SARS-CoV-2 infection fatality ratio and associated risk factors, Italy, February to April 2020. *Eurosurveillance*. 2020;25: 2001383. doi:10.2807/1560-7917.ES.2020.25.31.2001383
154. Allesi D, Borré S, Barale A, Isabella A, Milano F, Rossi MA, et al. Seroprevalence of anti-SARS-CoV-2 IgG/IgM antibodies in Borgosesia (Piedmont Region, Northern Italy) population: a surveillance strategy in post-lockdown period? *Epidemiol Prev*. 2020;44. doi:doi: 10.19191/EP20.5-6.S2.119
155. Calcagno A, Ghisetti V, Emanuele T, Trunfio M, Faraoni S, Boglione L, et al. Risk for SARS-CoV-2 Infection in Healthcare Workers, Turin, Italy. *Emerg Infect Dis*. 2021;27: 303–305. doi:10.3201/eid2701.203027
156. De Carlo A, Lo Caputo S, Paolillo C, Rosa AM, D’Orsi U, De Palma M, et al. SARS-COV-2 Serological Profile in Healthcare Professionals of a Southern Italy Hospital. *International Journal of Environmental Research and Public Health*. 2020;17: 9324. doi:10.3390/ijerph17249324
157. Martella F, Pozzessere D, Rossi F, Di Lieto M, Milandri C, Santini S, et al. SARS-COV-2 SCREENING AND MONITORING IN CANCER PATIENTS: AZIENDA USL TOSCANA CENTRO ONCOLOGY DEPARTMENT EXPERIENCE. *Tumori Journal*. 2020;106: 1–215. doi:10.1177/0300891620953388
158. Cavaliere AF, Carabeanu AI, Perelli F, Matarrese D, Brunelli T, Casprini P, et al. Universal screening for SARS-CoV-2 in pregnant women admitted for delivery: How to manage antibody testing? *The Journal of Maternal-Fetal & Neonatal Medicine*. 2020; 1–2. doi:10.1080/14767058.2020.1793317
159. Sandri MT, Azzolini E, Torri V, Carloni S, Pozzi C, Salvatici M, et al. SARS-CoV-2 serology in 4000 health care and administrative staff across seven sites in Lombardy, Italy. *medRxiv*. 2020; 2020.05.24.20111245. doi:10.1101/2020.05.24.20111245
160. Sartore-Bianchi A, Patelli G, Tosi F, Campisi D, Di Ruscio F, Bencardino K, et al. INCIDENCE OF SARS-COV-2 INFECTION IN PATIENTS WITH ACTIVE CANCER: MONO-INSTITUTIONAL SERIES OF A COMPREHENSIVE CANCER INSTITUTION IN LOMBARDY DURING THE COVID-19 PANDEMIC (NIGUARDA CANCER CENTER, MILANO, ITALY). *Tumori Journal*. 2020. pp. 1–215. doi:10.1177/0300891620953388

161. Stefanelli P, Bella A, Fedele G, Pancheri S, Leone P, Vacca P, et al. Prevalence of SARS-CoV-2 IgG antibodies in an area of northeastern Italy with a high incidence of COVID-19 cases: A population-based study. *Clinical Microbiology and Infection*. 2020;0. doi:10.1016/j.cmi.2020.11.013
162. Marra A, Generali D, Zagami P, Cervoni V, Gandini S, Venturini S, et al. Seroconversion in patients with cancer and oncology health care workers infected by SARS-CoV-2. *Annals of Oncology*. 2020;32: 113–119. doi:10.1016/j.annonc.2020.10.473
163. Guerriero M, Bisoffi Z, Poli A, Micheletto C, Conti A, Pomari C. Prevalence of SARS-CoV-2, Verona, Italy, April–May 2020 - Volume 27, Number 1—January 2021 - *Emerging Infectious Diseases journal - CDC*. *Emerging Infectious Diseases*. 2020 [cited 11 Mar 2021]. doi:10.3201/eid2701.202740
164. Baracco A, Perotti G, Filippin A, Anesi A, Beccarini V, Raimondi L, et al. SARS-CoV-2 Antibody Prevalence in Health Care Workers of Lodi Hospital, the COVID-19 Italian Epicentre. Rochester, NY: Social Science Research Network; 2020 Jul. Report No.: ID 3650227. Available: <https://papers.ssrn.com/abstract=3650227>
165. Denina M, Pellegrino F, Morotti F, Coppo P, Bonsignori IM, Garazzino S, et al. All that glitters is not COVID: Low prevalence of seroconversion against SARS-CoV-2 in a pediatric cohort of patients with Chilblain-like lesions. *Journal of the American Academy of Dermatology*. 2020 [cited 25 Sep 2020]. doi:10.1016/j.jaad.2020.08.021
166. Zambelli A, Fotia V, Bosetti T, Negrini G, di Croce A, Moro C, et al. 1676MO Prevalence and clinical impact of asymptomatic or mildly symptomatic SARS-CoV-2 infection among actively treated cancer patients during COVID-19 pandemic in Italy. *Annals of Oncology*. 2020;31: S994. doi:10.1016/j.annonc.2020.08.1741
167. Vena A, Berruti M, Adessi A, Blumetti P, Brignole M, Colognato R, et al. Prevalence of Antibodies to SARS-CoV-2 in Italian Adults and Associated Risk Factors. *Journal of Clinical Medicine*. 2020;9: 2780. doi:10.3390/jcm9092780
168. Carozzi FM, Cusi MG, Pistello M, Galli L, Bartoloni A, Anichini G, et al. Detection of asymptomatic SARS-CoV-2 infections among healthcare workers: Results from a large-scale screening program based on rapid serological testing. medRxiv. 2020 [cited 13 Nov 2020]. doi:10.1101/2020.07.30.20149567
169. Bontadi D, Bergamo L, Torri P, Patanè PA, Bertoldi A, Lonardi U. Efficacia delle misure volte a contenere la diffusione del virus Sars-Cov-2 negli ambienti di lavoro: Un'indagine in nove aziende con sede nella regione Veneto. *Med Lav*. 2020;111: 404–410. doi:10.23749/mdl.v111i5.10037
170. Di Landro A. Bergamo serological tests, the results of Nembro and Alzano arrive: 61% positive. Bergamo Chronicle. 30 Apr 2020. Available: [https://bergamo.corriere.it/notizie/cronaca/20\\_aprile\\_30/coronavirus-bergamo-primi-risultati-test-61percento-positivi-85e8e36c-8a6b-11ea-94d3-9879860c12b6.shtml](https://bergamo.corriere.it/notizie/cronaca/20_aprile_30/coronavirus-bergamo-primi-risultati-test-61percento-positivi-85e8e36c-8a6b-11ea-94d3-9879860c12b6.shtml). Accessed 13 Mar 2021.
171. Dalla Volta A, Valcamonico F, Pedersini R, Fornaro C, Tovazzi V, Monteverdi S, et al. The Spread of SARS-CoV-2 Infection Among the Medical Oncology Staff of ASST Spedali Civili of Brescia: Efficacy of Preventive Measures. *Front Oncol*. 2020;10: 1574. doi:10.3389/fonc.2020.01574
172. Lahner E, Dilaghi E, Prestigiacomo C, Alessio G, Marcellini L, Simmaco M, et al. Prevalence of Sars-Cov-2 Infection in Health Workers (HWs) and Diagnostic Test Performance: The Experience of a Teaching Hospital in Central Italy. *Int J Environ Res Public Health*. 2020;17. doi:10.3390/ijerph17124417
173. Loconsole D, Centrone F, Morcavallo C, Campanella S, Sallustio A, Quarto M, et al. The Light and Shadow of Rapid Serological Tests for SARS-CoV-2 Infection: Results from a Study in a Large Emergency Department. *IJERPH*. 2020;17: 6493. doi:10.3390/ijerph17186493
174. Cito F, Amato L, Di Giuseppe A, Danzetta ML, Iannetti S, Petrini A, et al. A COVID-19 Hotspot Area: Activities and Epidemiological Findings. *Microorganisms*. 2020;8: 1711. doi:10.3390/microorganisms8111711
175. Paradiso AV, Summa simona D, Silvestris N, Tommasi S, Tufaro A, Palma GD, et al. COVID-19 SCREENING AND MONITORING OF ASYMPTOMATIC HEALTH WORKERS WITH A RAPID SEROLOGICAL TEST. medRxiv. 2020; 2020.05.05.20086017. doi:10.1101/2020.05.05.20086017

176. Sotgiu G, Barassi A, Miozzo M, Saderi L, Piana A, Orfeo N, et al. SARS-CoV-2 specific serological pattern in healthcare workers of an Italian COVID-19 forefront hospital. *BMC Pulm Med.* 2020;20: 203. doi:10.1186/s12890-020-01237-0
177. Amendola A, Tanzi E, Folgori L, Barcellini L, Bianchi S, Gori M, et al. Low seroprevalence of SARS-CoV-2 infection among healthcare workers of the largest children hospital in Milan during the pandemic wave. *Infect Control Hosp Epidemiol.* 2020; 1–2. doi:10.1017/ice.2020.401
178. Canetti D, Dell'Acqua R, Riccardi N, Della Torre L, Bigoloni A, Muccini C, et al. SARS-CoV-2 IgG/IgM Rapid Test as a Diagnostic Tool in Hospitalized Patients and Healthcare Workers, at a large Teaching Hospital in northern Italy, during the 2020 COVID-19 Pandemic. *New Microbiol.* 2020;43: 161–165.
179. Valenti L, Bergna A, Pelusi S, Facciotti F, Lai A, Tarkowski M, et al. SARS-CoV-2 seroprevalence trends in healthy blood donors during the COVID-19 outbreak in Milan. *Blood Transfusion.* 2021 [cited 22 Apr 2021]. doi:10.2450/2021.0324-20
180. Percivalle E, Cambiè G, Cassaniti I, Nepita EV, Maserati R, Ferrari A, et al. Prevalence of SARS-CoV-2 specific neutralising antibodies in blood donors from the Lodi Red Zone in Lombardy, Italy, as at 06 April 2020. *Eurosurveillance.* 2020;25. doi:10.2807/1560-7917.ES.2020.25.24.2001031
181. Fusco FM, Pisaturo M, Iodice V, Bellopede R, Tambaro O, Parrella G, et al. COVID-19 among healthcare workers in a specialist infectious diseases setting in Naples, Southern Italy: Results of a cross-sectional surveillance study. *Journal of Hospital Infection.* 2020;105: 596–600. doi:10.1016/j.jhin.2020.06.021
182. Milani GP, Montomoli E, Bollati V, Albetti B, Bandi C, Bellini T, et al. SARS-CoV-2 infection among asymptomatic homebound subjects in Milan, Italy. *European Journal of Internal Medicine.* 2020;78: 161–163. doi:10.1016/j.ejim.2020.06.010
183. Pancrazzi A, Magliocca P, Lorubbio M, Vaggelli G, Galano A, Mafucci M, et al. Comparison of serologic and molecular SARS-CoV 2 results in a large cohort in Southern Tuscany demonstrates a role for serologic testing to increase diagnostic sensitivity. *Clinical Biochemistry.* 2020;84: 87–92. doi:10.1016/j.clinbiochem.2020.07.002
184. Apolone G, Montomoli E, Manenti A, Boeri M, Sabia F, Hyseni I, et al. Unexpected detection of SARS-CoV-2 antibodies in the pre-pandemic period in Italy. *Tumori.* 2020; 030089162097475. doi:10.1177/0300891620974755
185. Oka S, Higuchi T, Furukawa H, Shimada K, Hashimoto A, Matsui T, et al. Detection of anti-SARS-CoV-2 antibodies in patients with rheumatoid arthritis. 2020 [cited 7 Feb 2021]. doi:10.21203/rs.3.rs-112294/v1
186. Matthews MM, Kim TG, Shibata S, Shibata N, Butcher C, Hyun J, et al. COVID-19 serological survey using micro blood sampling. *medRxiv.* 2021; 2020.10.09.20209858. doi:10.1101/2020.10.09.20209858
187. Hibino S, Hayashida K, Ahn AC, Hayashida Y. COVID-19 seropositivity changes in asymptomatic individuals during the second and third waves of COVID-19 in Tokyo. *medRxiv.* 2021; 2020.09.21.20198796. doi:10.1101/2020.09.21.20198796
188. Fukuda H, Seyama K, Ito K, Hori S, Wakita M, Saito K, et al. SARS-CoV-2 seroprevalence in healthcare workers at a frontline hospital in Tokyo. In Review; 2020 Oct. doi:10.21203/rs.3.rs-96870/v1
189. Hibino M, Iwabuchi S, Munakata H. SARS-CoV-2 IgG seroprevalence among medical staff in a general hospital that treated patients with COVID-19 in Japan: Retrospective evaluation of nosocomial infection control. *Journal of Hospital Infection.* 2020;107: 103–104. doi:10.1016/j.jhin.2020.10.001
190. Nawa N, Kuramochi J, Sonoda S, Yamaoka Y, Nukui Y, Miyazaki Y, et al. Seroprevalence of SARS-CoV-2 IgG Antibodies in Utsunomiya City, Greater Tokyo, after first pandemic in 2020 (U-CORONA): A household- and population-based study. *medRxiv.* 2020; 2020.07.20.20155945. doi:10.1101/2020.07.20.20155945
191. わかやま県政ニュース. [cited 22 Apr 2021]. Available: <http://wave.pref.wakayama.lg.jp/news/kensei/shiryō.php?sid=31587>

192. Nishida T, Iwahashi H, Yamauchi K, Kinoshita N, Okauchi Y, Suzuki N, et al. Seroprevalence of SARS-CoV-2 Antibodies Among 925 Staff Members in an Urban Hospital Accepting COVID-19 Patients in Osaka Prefecture, Japan. *medRxiv*. 2020; 2020.09.10.20191866. doi:10.1101/2020.09.10.20191866
193. Yong Chong, Naoki Tani, Hideyuki Ikematsu, Nobuto Terazawa, Hitoshi Nakashima, Nobuyuki Shimono, et al. Genetic testing and serological screening for SARS-CoV-2 infection in a COVID-19 outbreak in a nursing facility in Japan. *Research Square*. 2020. doi:10.21203/rs.3.rs-64266/v1
194. Suda G, Ogawa K, Kimura M, Maehara O, Kitagataya T, Ohara M, et al. Time-dependent changes in the seroprevalence of COVID-19 in asymptomatic liver disease outpatients in an area in Japan undergoing a second wave of COVID-19. *Hepatology*. 2020. doi:10.1111/hepr.13551
195. Nakamura A, Sato R, Ando S, Oana N, Nozaki E, Endo H, et al. Orthogonal antibody testing for COVID-19 among healthcare workers in a non-epidemic place and time: Japan's Iwate Prefecture, May 18-31, 2020. *Fukushima Journal of Medical Science*. 2021;67: 27–32. doi:10.5387/fms.2020-21
196. The difference between IgM and IgG antibody prevalence in different serological assays for COVID-19; lessons from the examination of healthcare workers. *International Immunopharmacology*. 2021;92: 107360. doi:10.1016/j.intimp.2020.107360
197. Takita M, Matsumura T, Yamamoto K, Yamashita E, Hosoda K, Hamaki T, et al. Geographical Profiles of COVID-19 Outbreak in Tokyo: An Analysis of the Primary Care Clinic–Based Point-of-Care Antibody Testing. *J Prim Care Community Health*. 2020;11: 215013272094269. doi:10.1177/2150132720942695
198. Denyer S. Japanese firm's blanket testing of employees could serve as model. *LMT Online*. 21 Jun 2020. Available: <https://www.google.com/url?rct=j&sa=t&url=https://www.lmtonline.com/ne>. Accessed 13 Mar 2021.
199. Fujita K, Kada S, Kanai O, Hata H, Odagaki T, Satoh-Asahara N, et al. Quantitative SARS-CoV-2 Antibody Screening of Healthcare Workers in the Southern Part of Kyoto City During the COVID-19 Pre-pandemic Period. *Front Public Health*. 2020;8. doi:10.3389/fpubh.2020.595348
200. Doi A, Iwata K, Kuroda H, Hasuike T, Nasu S, Kanda A, et al. Estimation of seroprevalence of novel coronavirus disease (COVID-19) using preserved serum at an outpatient setting in Kobe, Japan: A cross-sectional study. *medRxiv*. 2020; 2020.04.26.20079822. doi:10.1101/2020.04.26.20079822
201. Suzuki T, Hayakawa K, Ainai A, Iwata-Yoshikawa N, Sano K, Nagata N, et al. Effectiveness of personal protective equipment in preventing severe acute respiratory syndrome coronavirus 2 infection among healthcare workers. *Journal of Infection and Chemotherapy*. 2021;27: 120–122. doi:10.1016/j.jiac.2020.09.006
202. Schaffner A, Risch L, Aeschbacher S, Risch C, Weber MC, Thiel SL, et al. Characterization of a Pan-Immunoglobulin Assay Quantifying Antibodies Directed against the Receptor Binding Domain of the SARS-CoV-2 S1-Subunit of the Spike Protein: A Population-Based Study. *Journal of Clinical Medicine*. 2020;9: 3989. doi:10.3390/jcm9123989
203. Snoeck C. Prevalence of SARS-CoV-2 infection in the Luxembourgish population: The CON-VINCE study. Preprint.
204. Fabien Binacchi. Monaco has tested its population and the seroprevalence rate is very low. *Teller Report*; 16 Jun 2020 [cited 28 Apr 2021]. Available: <https://www.tellerreport.com/news/2020-06-16-monaco-has-tested-its-population-and-the-seroprevalence-rate-is-very-low.SJ66VJ4UT8.html>
205. Vos ERA, Hartog G den, Schepp RM, Kaaijk P, Vliet J van, Helm K, et al. Nationwide seroprevalence of SARS-CoV-2 and identification of risk factors in the general population of the Netherlands during the first epidemic wave. *J Epidemiol Community Health*. 2020 [cited 23 Jan 2021]. doi:10.1136/jech-2020-215678
206. Slot E, Hogema BM, Reusken CBEM, Reimerink JH, Molier M, Karregat JHM, et al. Low SARS-CoV-2 seroprevalence in blood donors in the early COVID-19 epidemic in the Netherlands. *Nature Communications*. 2020;11: 5744. doi:10.1038/s41467-020-19481-7

207. Westerhuis BM, de Bruin E, Chandler FD, Ramakers CRB, Okba NMA, Li W, et al. Homologous and heterologous antibodies to coronavirus 229E, NL63, OC43, HKU1, SARS, MERS and SARS-CoV-2 antigens in an age stratified cross-sectional serosurvey in a large tertiary hospital in The Netherlands. medRxiv. 2020; 2020.08.21.20177857. doi:10.1101/2020.08.21.20177857
208. Craigie A, McGregor R, Whitcombe A, Carlton L, Harte D, Sutherland M, et al. SARS-CoV-2 antibodies in the Southern Region of New Zealand, 2020. medRxiv. 2020; 2020.10.20.20215616. doi:10.1101/2020.10.20.20215616
209. Gro Tunheim, Anne-Marte Bakken Kran, Gunnar Rø, Anneke Steens, Olav Hungnes, Fridtjof Lund-Johansen, et al. Seroprevalence of SARS-CoV-2 in the Norwegian population measured in residual sera collected in April/May 2020 and August 2019. Norwegian Institute of Public Health; 2020 Jun p. 13. Available: [https://www.fhi.no/globalassets/dokumenterfiler/rapporter/2020/covid-19/seroprevalence-of-sars-cov-2-in-the-norwegian-population\\_report-26-06-2020.pdf](https://www.fhi.no/globalassets/dokumenterfiler/rapporter/2020/covid-19/seroprevalence-of-sars-cov-2-in-the-norwegian-population_report-26-06-2020.pdf)
210. Trieu M-C, Bansal A, Madsen A, Zhou F, Sævik M, Vahokoski J, et al. SARS-CoV-2–Specific Neutralizing Antibody Responses in Norwegian Health Care Workers After the First Wave of COVID-19 Pandemic: A Prospective Cohort Study. *The Journal of Infectious Diseases*. 2020 [cited 29 Jan 2021]. doi:10.1093/infdis/jiaa737
211. Kuwelker K, Zhou F, Blomberg B, Lartey S, Brokstad KA, Trieu MC, et al. High attack rates of SARS-CoV-2 infection through household-transmission: A prospective study. 2020 [cited 2 Mar 2021]. doi:10.1101/2020.11.02.20224485
212. Cox RJ, Brokstad KA, Krammer F, Langeland N. Seroconversion in household members of COVID-19 outpatients. *Lancet Infect Dis*. 2021;21: 168. doi:10.1016/S1473-3099(20)30466-7
213. Figueiredo-Campos P, Blankenhaus B, Mota C, Gomes A, Serrano M, Ariotti S, et al. Seroprevalence of anti-SARS-CoV-2 antibodies in COVID-19 patients and healthy volunteers up to 6 months post disease onset. *European Journal of Immunology*. 2020;50: 2025–2040. doi:10.1002/eji.202048970
214. Figueiredo-Campos P, Blankenhaus B, Mota C, Gomes A, Serrano M, Ariotti S, et al. Seroprevalence of anti-SARS-CoV-2 antibodies in COVID-19 patients and healthy volunteers up to 6 months post disease onset. *European Journal of Immunology*. 2020;50: 2025–2040. doi:10.1002/eji.202048970
215. Kislaya I, Gonçalves P, Barreto M, Sousa R de, Garcia AC, Matos R, et al. Seroprevalence of SARS-CoV-2 Infection in Portugal in May-July 2020: Results of the First National Serological Survey (ISNCOVID-19). *Acta Médica Portuguesa*. 2021;34: 87–94. doi:10.20344/amp.15122
216. Gonçalves J, Sousa RL, Jacinto MJ, Silva DA, Paula F, Sousa R, et al. Evaluating SARS-CoV-2 Seroconversion Following Relieve of Confinement Measures. *Front Med*. 2020;7. doi:10.3389/fmed.2020.603996
217. COVID-19 Serology Tests Still Show Low Antibody Rate of 0.07%. KBS World Radio; [cited 7 Mar 2021]. Available: [http://world.kbs.co.kr/service/news\\_view.htm?lang=e&Seq\\_Code=157801](http://world.kbs.co.kr/service/news_view.htm?lang=e&Seq_Code=157801)
218. Yang Ji-ho. Few Koreans Test Positive for Coronavirus Antibodies. Chosunlibo. 10 Jul 2020. Available: [http://english.chosun.com/site/data/html\\_dir/2020/07/10/2020071001864.html](http://english.chosun.com/site/data/html_dir/2020/07/10/2020071001864.html)
219. Song S-K, Lee D-H, Nam J-H, Kim K-T, Do J-S, Kang D-W, et al. IgG Seroprevalence of COVID-19 among Individuals without a History of the Coronavirus Disease Infection in Daegu, Korea. *J Korean Med Sci*. 2020;35. Available: <https://doi.org/10.3346/jkms.2020.35.e269>
220. Noh JY, Seo YB, Yoon JG, Seong H, Hyun H, Lee J, et al. Seroprevalence of Anti-SARS-CoV-2 Antibodies among Outpatients in Southwestern Seoul, Korea. *Journal of Korean Medical Science*. 2020;35. doi:10.3346/jkms.2020.35.e311
221. Ko J-H, Lee JY, Kim HA, Kang S-J, Baek JY, Park S-J, et al. Serologic Evaluation of Healthcare Workers Caring for COVID-19 Patients in the Republic of Korea. *Front Microbiol*. 2020;11. doi:10.3389/fmicb.2020.587613

222. Rei Kurohi, Linette Lai. Coronavirus: Community transmission in S'pore very low, but so is herd immunity, NCID says. *The Straits Times*; 29 Apr 2020. Available: <https://www.straitstimes.com/singapore/health/coronavirus-community-transmission-in-spore-very-low-but-so-is-herd-immunity-says>
223. Ng OT, Marimuthu K, Koh V, Pang J, Linn KZ, Sun J, et al. SARS-CoV-2 seroprevalence and transmission risk factors among high-risk close contacts: A retrospective cohort study. *The Lancet Infectious Diseases*. 2021;21: 333–343. doi:10.1016/S1473-3099(20)30833-1
224. Savirón-Cornudella R, Villalba A, Zapardiel J, Andeyro-Garcia M, Esteban LM, Pérez-López FR. Severe acute respiratory syndrome coronavirus 2 (SARS-CoV-2) universal screening in gravids during labor and delivery. *European Journal of Obstetrics & Gynecology and Reproductive Biology*. 2020;256: 400–404. doi:10.1016/j.ejogrb.2020.11.069
225. Garde-Noguera J, Fernández-Murga ML, Giner-Bosch V, Dominguez-Márquez V, Sánchez JG, Soler-Cataluña JJ, et al. Impact of SARS-CoV-2 Infection on Patients with Cancer: Retrospective and Transversal Studies in Spanish Population. *Cancers*. 2020;12: 3513. doi:10.3390/cancers12123513
226. Prados N, González-Ravina C, Vergara V, Herrero J, Cruz M, Requena A. RISK FACTOR ANALYSIS FOR SARS-COV-2 SEROPOSITIVITY WITHIN ASSISTED REPRODUCTIVE. *Fertility and Sterility*. 2020;114: e547. doi:10.1016/j.fertnstert.2020.09.077
227. Cabezón-Gutiérrez L, Custodio-Cabello S, Palka-Kotlowska M, Oliveros-Acebes E, García-Navarro MJ, Khosravi-Shahi P. Seroprevalence of SARS-CoV-2-specific antibodies in cancer outpatients in Madrid (Spain): A single center, prospective, cohort study and a review of available data. *Cancer Treatment Reviews*. 2020;90: 102102. doi:10.1016/j.ctrv.2020.102102
228. Hernández Camba A, Marcelino Reyes R, Hernández-Guerra M, Blasco Amato OA, Bennemann P, Diaz Machin S, et al. Pre-Procedural Antibody Testing for SARS-CoV-2 in routine endoscopic practice. *Rev Esp Enferm Dig*. 2020 [cited 31 Jan 2021]. doi:10.17235/reed.2020.7434/2020
229. Brotons P, Launes C, Buetas E, Fumado V, Henares D, de Sevilla MF, et al. Susceptibility to Sars-COV-2 Infection Among Children And Adults: A Seroprevalence Study of Family Households in the Barcelona Metropolitan Region, Spain. *Clinical Infectious Diseases*. 2020 [cited 23 Jan 2021]. doi:10.1093/cid/ciaa1721
230. FLORES D. Coronavirus | Los test serológicos de Torrejón de Ardoz arrojan un 20,18 % de personas con anticuerpos de coronavirus. RTVEes: NOTICIAS. 17 Jun 2020. Available: <https://www.rtve.es/noticias/20200617/test-serologicos-torrejón-ardož-arrojan-2018-habitantes-tiene-anticuerpos-coronavirus/2018787.shtml>. Accessed 7 Oct 2020.
231. Pérez-García F, Pérez-Zapata A, Arcos N, De la Mata M, Ortiz M, Simón E, et al. Severe acute respiratory coronavirus virus 2 (SARS-CoV-2) infection among hospital workers in a severely affected institution in Madrid, Spain: A surveillance cross-sectional study. *Infect Control Hosp Epidemiol*. 2020; 1–7. doi:10.1017/ice.2020.1303
232. Fabre M, Ruiz-Martinez S, Monserrat Cantera M, Cortizo Garrido A, Beunza Fabra Z, Peran M, et al. SARS-CoV-2 immunochromatographic IgM/IgG rapid test in pregnancy: A false friend? *Ann Clin Biochem*. 2020;58: 149–152. doi:10.1177/0004563220980495
233. Barallat J, Fernández-Rivas G, Quirant-Sánchez B, González V, Doladé M, Martínez-Caceres E, et al. Seroprevalence of SARS-CoV-2 IgG specific antibodies among healthcare workers in the Northern Metropolitan Area of Barcelona, Spain, after the first pandemic wave. *PLOS ONE*. 2020;15: e0244348. doi:10.1371/journal.pone.0244348
234. Viñuela MC, De León-Luis JA, Alonso R, Catalán P, Lizarraga S, Muñoz P, et al. SARS-CoV-2 screening of asymptomatic women admitted for delivery must be performed with a combination of microbiological techniques: An observational study. *Rev Esp Quimioter*. 2020;33: 415–421. doi:10.37201/req/088.2020
235. Soriano V, Meiriño R, Corral O, Guallar MP. Severe Acute Respiratory Syndrome Coronavirus 2 Antibodies in Adults in Madrid, Spain. *Clinical Infectious Diseases*. 2020 [cited 14 Nov 2020]. doi:10.1093/cid/ciaa769

236. Pollán M, Pérez-Gómez B, Pastor-Barriuso R, Oteo J, Hernán MA, Pérez-Olmeda M, et al. Prevalence of SARS-CoV-2 in Spain (ENE-COVID): A nationwide, population-based seroepidemiological study. *The Lancet*. 2020; S0140673620314835. doi:10.1016/S0140-6736(20)31483-5
237. Villalaín C, Herraiz I, Luczkowiak J, Pérez-Rivilla A, Folgueira MD, Mejía I, et al. Seroprevalence analysis of SARS-CoV-2 in pregnant women along the first pandemic outbreak and perinatal outcome. Cruz-Martinez R, editor. *PLoS ONE*. 2020;15: e0243029. doi:10.1371/journal.pone.0243029
238. Gras-Valentí P, Chico-Sánchez P, Algado-Sellés N, Gimeno-Gascón MA, Mora-Muriel JG, Jiménez-Sepúlveda NJ, et al. Estudio de sero-epidemiología de la infección por SARS-CoV-2 en profesionales sanitarios de un departamento sanitario. *Enfermedades Infecciosas y Microbiología Clínica*. 2020; S0213005X20303098. doi:10.1016/j.eimc.2020.09.015
239. Crovetto F, Crispi F, Llurba E, Figueras F, Gómez-Roig MD, Gratacós E. Seroprevalence and presentation of SARS-CoV-2 in pregnancy. *The Lancet*. 2020;396: 530–531. doi:10.1016/S0140-6736(20)31714-1
240. Valdivia A, Torres I, Huntley D, Alcaraz MJ, Albert E, Solano de la Asunción C, et al. Caveats in interpreting SARS-CoV-2 IgM+/IgG– antibody profile in asymptomatic health care workers. *Journal of Medical Virology*. 2020;n/a. doi:10.1002/jmv.26400
241. Galán MI, Velasco M, Casas ML, Goyanes MJ, Rodríguez-Caravaca G, Losa-García JE, et al. Hospital-Wide SARS-CoV-2 seroprevalence in health care workers in a Spanish teaching hospital. *Enfermedades Infecciosas y Microbiología Clínica*. 2020; S0213005X20304183. doi:10.1016/j.eimc.2020.11.015
242. Olalla J, Correa AM, Martín-Escalante MD, Hortas ML, Martín-Sendarrubias MJ, Fuentes V, et al. Search for asymptomatic carriers of SARS-CoV-2 in healthcare workers during the pandemic: A Spanish experience. *QJM: An International Journal of Medicine*. 2020 [cited 14 Nov 2020]. doi:10.1093/qjmed/hcaa238
243. Montenegro P, Brotons C, Serrano J, Fernández D, García-Ramos C, Ichazo B, et al. Community seroprevalence of COVID-19 in probable and possible cases at primary health care centres in Spain. *Family Practice*. 2020 [cited 8 Jan 2021]. doi:10.1093/fampra/cmaa096
244. Moreno Borraz LA, Giménez López M, Carrera Lasfuentes P, González Pérez E, Ortiz Domingo C, Bonafonte Marteles JL, et al. Prevalencia de infección por coronavirus SARS-CoV-2 en pacientes y profesionales de un hospital de media y larga estancia en España. *Revista Española de Geriatria y Gerontología*. 2020;56: 75–80. doi:10.1016/j.regg.2020.10.005
245. Dacosta-Urbieta A, Rivero-Calle I, Pardo-Seco J, Redondo-Collazo L, Salas A, Gómez-Rial J, et al. Seroprevalence of SARS-CoV-2 Among Pediatric Healthcare Workers in Spain. *Front Pediatr*. 2020;8. doi:10.3389/fped.2020.00547
246. Martín V, Fernández-Villa T, Lamuedra Gil de Gomez M, Mencía-Ares O, Rivero Rodríguez A, Reguero Celada S, et al. Prevalence of SARS-CoV-2 infection in general practitioners and nurses in primary care and nursing homes in the Healthcare Area of León and associated factors. *Medicina de Familia SEMERGEN*. 2020;46: 35–39. doi:10.1016/j.semerg.2020.05.014
247. Garralda Fernandez J, Molero Vilches I, Bermejo Rodríguez A, Cano Torres I, Colino Romay EI, García Arata I, et al. Impact of SARS-CoV-2 pandemic among health care workers in a secondary teaching hospital in Spain. Page K, editor. *PLoS ONE*. 2021;16: e0245001. doi:10.1371/journal.pone.0245001
248. Dopico XC, Muschiol S, Christian M, Hanke L, Sheward DJ, Grinberg NF, et al. Seropositivity in blood donors and pregnant women during 9-months of SARS-CoV-2 transmission in Stockholm, Sweden. *medRxiv*. 2020; 2020.12.24.20248821. doi:10.1101/2020.12.24.20248821
249. Rashid-Abdi M, Krifors A, Sälléber A, Eriksson J, Månsson E. Low rate of COVID-19 seroconversion in health-care workers at a Department of Infectious Diseases in Sweden during the later phase of the first wave; a prospective longitudinal seroepidemiological study. *Infectious Diseases*. 2020;53: 169–175. doi:10.1080/23744235.2020.1849787



250. The Local SE. 14% of coronavirus antibody tests positive in Sweden in July. The Local SE. 23 Jul 2020. Available: <https://www.thelocal.se/20200723/14-of-antibody-tests-positive-in-sweden>
251. Stockholm Region. 16 juli: Lägesrapport om arbetet med det nya coronaviruset. Stockholm Region. 16 Jul 2020. Available: <https://www.sll.se/verksamhet/halsa-och-varld/nyheter-halsa-och-varld/2020/07/16-juli-lagesrapport-om-arbetet-med-det-nya-coronaviruset/>
252. Lidström A-K, Sund F, Albinsson B, Lindbäck J, Westman G. Work at inpatient care units is associated with an increased risk of SARS-CoV-2 infection; a cross-sectional study of 8679 healthcare workers in Sweden. *null*. 2020;125: 305–310. doi:10.1080/03009734.2020.1793039
253. Lundkvist Å, Hanson S, Olsen B. Pronounced difference in Covid-19 antibody prevalence indicates cluster transmission in Stockholm, Sweden. *Infection Ecology & Epidemiology*. 2020;10: 1806505. doi:10.1080/20008686.2020.1806505
254. Hassan SS, Seigerud Å, Mühr LSA, Kleppe SN, Pin E, Månberg A, et al. SARS-CoV-2 infections among personnel providing home care services for the elderly in Stockholm, Sweden. *medRxiv*. 2020 [cited 15 May 2021]. doi:10.1101/2020.12.18.20248511
255. Agency SPH. Påvisning av antikroppar efter genomgången covid-19 hos blodgivare (Delrapport 1). Swedish Public Health Agency; 2020 Jun. Available: <https://www.folkhalsomyndigheten.se/contentassets/9c5893f84bd049e691562b9eeb0ca280/pavisning-antikroppar-genomgangen-covid-19-blodprov-oppenvarden-delrapport-1.pdf>
256. Niclas Roxhed, Hong M-G, Bendes A, Matilda Dale, Mattsson C, Dodig-Crnkovic T, et al. A translational multiplex serology approach to profile the prevalence of anti-SARS-CoV-2 antibodies in home-sampled blood | *medRxiv*. *medRxiv*. 2020 [cited 6 Jul 2020]. Available: <https://www.medrxiv.org/content/10.1101/2020.07.01.20143966v1>
257. Rudberg A-S, Havervall S, Månberg A, Jernbom Falk A, Aguilera K, Ng H, et al. SARS-CoV-2 exposure, symptoms and seroprevalence in healthcare workers in Sweden. *Nature Communications*. 2020;11: 5064. doi:10.1038/s41467-020-18848-0
258. Lindahl JF, Hoffman T, Esmailzadeh M, Olsen B, Winter R, Amer S, et al. High seroprevalence of SARS-CoV-2 in elderly care employees in Sweden. *null*. 2020;10: 1789036. doi:10.1080/20008686.2020.1789036
259. Ulyte A, Radtke T, Abela IA, Haile SR, Berger C, Huber M, et al. Clustering and longitudinal change in SARS-CoV-2 seroprevalence in school-children: Prospective cohort study of 55 schools in Switzerland. *medRxiv*. 2020; 2020.12.19.20248513. doi:10.1101/2020.12.19.20248513
260. Anker D, Chiorelo A, Epure A, Schmid A, Carmeli C, Rodondi P-Y, et al. Corona Immunitas Fribourg Immunité de la population Episode 1/2020. *Corona Immunitas*; 2020 Nov. Available: <https://www.corona-immunitas.ch/en/news/corona-immunitas-ticino-insieme-per-reagire-al-via-la-seconda-fase-del-progetto-1-1-1/>
261. Kahlert CR, Persi R, Güsewell S, Egger T, Leal-Neto OB, Sumer J, et al. Non-occupational and occupational factors associated with specific SARS-CoV-2 antibodies among Hospital Workers – a multicentre cross-sectional study. *medRxiv*. 2020; 2020.11.10.20229005. doi:10.1101/2020.11.10.20229005
262. Corona Immunitas Ticino, the first results are in. [cited 23 Apr 2021]. Available: <https://www.biomed.usi.ch/en/feeds/8913>
263. Emmenegger M, De Cecco E, Lamparter D, Jacquat RPB, Ebner D, Schneider MM, et al. Early peak and rapid decline of SARS-CoV-2 seroprevalence in a Swiss metropolitan region. *medRxiv*. 2020 [cited 14 May 2021]. doi:10.1101/2020.05.31.20118554
264. Ulyte A, Radtke T, Abela IA, Haile SH, Blankenberger J, Jung R, et al. Variation in SARS-CoV-2 seroprevalence in school-children across districts, schools and classes. *medRxiv*. 2020; 2020.09.18.20191254. doi:10.1101/2020.09.18.20191254

265. Bi Q, Lessler J, Eckerle I, Lauer SA, Kaiser L, Vuilleumier N, et al. Household Transmission of SARS-CoV-2: Insights from a Population-based Serological Survey. *Epidemiology*; 2020 Nov. doi:10.1101/2020.11.04.20225573
266. Richard A, Wisniak A, Perez-Saez J, Garrison-Desany H, Petrovic D, Piumatti G, et al. Seroprevalence of anti-SARS-CoV-2 IgG antibodies, risk factors for infection and associated symptoms in Geneva, Switzerland: A population-based study. *medRxiv*. 2020 [cited 15 May 2021]. doi:10.1101/2020.12.16.20248180
267. Fenwick C, Croxatto A, Coste AT, Pojer F, André C, Pellaton C, et al. Changes in SARS-CoV-2 Spike versus Nucleoprotein Antibody Responses Impact the Estimates of Infections in Population-Based Seroprevalence Studies. Subbarao K, editor. *J Virol*. 2020;95: e01828–20, /jvi/95/3/JVI.01828–20.atom. doi:10.1128/JVI.01828-20
268. Dupraz J, Butty A, Duperrex O, Estoppey S, Faivre V, Thabard J, et al. Prevalence of SARS-CoV-2 in household members and other close contacts of COVID-19 cases: A serologic study in canton of Vaud, Switzerland. *medRxiv*. 2020; 2020.11.27.20239244. doi:10.1101/2020.11.27.20239244
269. Posfay-Barbe KM, Andrey DO, Virzi J, Cohen P, Pigny F, Goncalves AR, et al. Prevalence of Immunoglobulin G (IgG) Against Severe Acute Respiratory Syndrome Coronavirus 2 (SARS-CoV-2) and Evaluation of a Rapid MEDsan IgG Test in Children Seeking Medical Care. *Clinical Infectious Diseases*. 2020; ciaa1702. doi:10.1093/cid/ciaa1702
270. Kohler PP, Kahlert CR, Sumer J, Flury D, Güsewell S, Leal-Neto OB, et al. Prevalence of SARS-CoV-2 antibodies among Swiss hospital workers: Results of a prospective cohort study. *Infect Control Hosp Epidemiol*. 2020; 1–5. doi:10.1017/ice.2020.1244
271. Steel K, Donnarumma. H. Coronavirus (COVID-19) Infection Survey: Antibody data for the UK, January 2021. Office for National Statistics; 2021 Jan. Available: <https://www.ons.gov.uk/peoplepopulationandcommunity/healthandsocialcare/conditionsanddiseases/articles/coronaviruscovid19infectionsinthecommunityinengland/antibodydatafortheukjanuary2021#likelihood-of-testing-positive-for-covid-19-antibodies-in-england-wales-northern-ireland-and-scotland>
272. Steel K, Davies B. Coronavirus (COVID-19) Infection Survey: Characteristics of people testing positive for COVID-19 in England and antibody data for the UK - Office for National Statistics. Office for National Statistics; 2020 Dec p. 12. Available: <https://www.ons.gov.uk/peoplepopulationandcommunity/healthandsocialcare/conditionsanddiseases/articles/coronaviruscovid19infectionsinthecommunityinengland/december2020>
273. Taubel J, Cole ST, Spencer CS, Freier A, Camilleri D, Lorch U. Why the SARS-CoV-2 antibody test results may be misleading: Insights from a longitudinal analysis of COVID-19. *medRxiv*. 2020; 2020.12.08.20245894. doi:10.1101/2020.12.08.20245894
274. Lumley SF, O'Donnell D, Stoesser NE, Matthews PC, Howarth A, Hatch SB, et al. Antibody Status and Incidence of SARS-CoV-2 Infection in Health Care Workers. *N Engl J Med*. 2020; NEJMoa2034545. doi:10.1056/NEJMoa2034545
275. Steel K, Davies B. Coronavirus (COVID-19) Infection Survey: Characteristics of people testing positive for COVID-19 in England and antibody data for the UK - Office for National Statistics. Office for National Statistics; 2020 Nov p. 12. Available: <https://www.ons.gov.uk/peoplepopulationandcommunity/healthandsocialcare/conditionsanddiseases/articles/coronaviruscovid19infectionsinthecommunityinengland/december2020>
276. Steel K, Davies B. Coronavirus (COVID-19) Infection Survey: Characteristics of people testing positive for COVID-19 in England and antibody data for the UK - Office for National Statistics. Office for National Statistics; 2020 Oct p. 12. Available: <https://www.ons.gov.uk/peoplepopulationandcommunity/healthandsocialcare/conditionsanddiseases/articles/coronaviruscovid19infectionsinthecommunityinengland/november2020>

277. Ward H, Cooke G, Atchison C, Whitaker M, Elliott J, Moshe M, et al. Declining prevalence of antibody positivity to SARS-CoV-2: A community study of 365,000 adults. medRxiv. 2020; 2020.10.26.20219725. doi:10.1101/2020.10.26.20219725
278. Steel K, Davies B. Coronavirus (COVID-19) Infection Survey: Characteristics of people testing positive for COVID-19 in England and antibody data for the UK - Office for National Statistics. Office for National Statistics; 2020 Sep p. 12. Available: <https://www.ons.gov.uk/peoplepopulationandcommunity/healthandsocialcare/conditionsanddiseases/articles/coronaviruscovid19infectionsinthecommunityinengland/november2020>
279. England PH. National COVID-19 surveillance report: 2 October 2020 (week 40). Public Health England; 2020 Oct. Available: <https://www.gov.uk/government/publications/national-covid-19-surveillance-reports>
280. Abo-Leyah H, Gallant S, Cassidy D, Giam YH, Killick J, Marshall B, et al. Seroprevalence of SARS-COV-2 Antibodies in Scottish Healthcare Workers. medRxiv. 2020; 2020.10.02.20205641. doi:10.1101/2020.10.02.20205641
281. England PH. National COVID-19 surveillance report: 11 September 2020 (week 37). Public Health England; 2020 Sep. Available: <https://www.gov.uk/government/publications/national-covid-19-surveillance-reports>
282. Steel K, Davies B. Coronavirus (COVID-19) Infection Survey: Characteristics of people testing positive for COVID-19 in England and antibody data for the UK - Office for National Statistics. Office for National Statistics; 2020 Aug p. 12. Available: <https://www.ons.gov.uk/peoplepopulationandcommunity/healthandsocialcare/conditionsanddiseases/articles/coronaviruscovid19infectionsinthecommunityinengland/november2020>
283. Harris RJ, Whitaker HJ, Andrews NJ, Aiano F, Amin-Chowdhury Z, Flood J, et al. Serological surveillance of SARS-CoV-2: Trends and humoral response in a cohort of public health workers. medRxiv. 2020; 2020.10.21.20216689. doi:10.1101/2020.10.21.20216689
284. Roarty C, Tonry C, McFetridge L, Mitchell H, Watson C, Waterfield T, et al. Kinetics and seroprevalence of SARS-CoV-2 antibodies in children. *The Lancet Infectious Diseases*. 2020;0. doi:10.1016/S1473-3099(20)30884-7
285. Andrew McAuley, Elizabeth Dickson, Norah Palmateer, Josie Murray, Craig Waugh, Lesley Wallace, et al. Enhanced Surveillance of COVID-19 in Scotland Population-based seroprevalence surveillance. Public Health Scotland; 2020 Sep. Available: <https://beta.isdscotland.org/find-publications-and-data/population-health/covid-19/enhanced-surveillance-of-covid-19-in-scotland/>
286. Cooper DJ, Lear S, Watson L, Shaw A, Ferris M, Doffinger R, et al. A prospective study of risk factors associated with seroprevalence of SARS-CoV-2 antibodies in healthcare workers at a large UK teaching hospital. medRxiv. 2020; 2020.11.03.20220699. doi:10.1101/2020.11.03.20220699
287. Black JT, Haroon U, Barnes SC, Mayaleh S, Bagul A. Seroprevalence of SARS-CoV-2 IgG antibodies in the current COVID-19 pandemic amongst co-workers at a UK renal transplant centre. *Transplant International*. n/a. doi:10.1111/tri.13791
288. England PH. National COVID-19 surveillance report: 7 August 2020 (week 32). Public Health England; 2020 Aug. Available: <https://www.gov.uk/government/publications/national-covid-19-surveillance-reports>
289. Claudiani S, Rosadas C, McClure M, Khan M, Tedder R, Innes A, et al. Prevalence of Sars-Cov-2 Infection in Patients with Chronic Myeloid Leukemia. *Blood*. 2020;136. Available: <https://ashpublications.org/crawlpreservation/governor?content=>
290. Ward H, Atchison C, Whitaker M, Ainslie KEC, Elliott J, Okell L, et al. SARS-CoV-2 antibody prevalence in England following the first peak of the pandemic. *Nature Communications*. 2021;12: 905. doi:10.1038/s41467-021-21237-w

291. Martin CA, Patel P, Goss C, Jenkins DR, Price A, Barton L, et al. Demographic and occupational determinants of anti-SARS-CoV-2 IgG seropositivity in hospital staff. *Journal of Public Health*. 2020 [cited 14 Mar 2021]. doi:10.1093/pubmed/fdaa199
292. Hanrath AT, Loeff IS van der, Lendrem DW, Baker KF, Price DA, McDowall P, et al. SARS-CoV-2 testing of 11,884 healthcare workers at an acute NHS hospital trust in England: A retrospective analysis. medRxiv. 2020; 2020.12.22.20242362. doi:10.1101/2020.12.22.20242362
293. Prendecki M, Clarke C, Gleeson S, Greathead L, Santos E, McLean A, et al. Detection of SARS-CoV-2 Antibodies in Kidney Transplant Recipients. *JASN*. 2020;31: 2753–2756. doi:10.1681/ASN.2020081152
294. Waterfield T, Watson C, Moore R, Ferris K, Tonry C, Watt A, et al. Seroprevalence of SARS-CoV-2 antibodies in children: A prospective multicentre cohort study. *Archives of Disease in Childhood*. 2020 [cited 14 Mar 2021]. doi:10.1136/archdischild-2020-320558
295. Steel K, Davies B. Coronavirus (COVID-19) Infection Survey: Characteristics of people testing positive for COVID-19 in England and antibody data for the UK - Office for National Statistics. Office for National Statistics; 2020 Jul p. 12. Available: <https://www.ons.gov.uk/peoplepopulationandcommunity/healthandsocialcare/conditionsanddiseases/articles/coronaviruscovid19infectionsinthecommunityinengland/november2020>
296. Rowland TAJ, Whitaker H, Jeffery-Smith A, Lang N, Sendall K, McLaren R, et al. Seropositivity and risk factors for SARS-CoV-2 infection in staff working in care homes during the COVID-19 pandemic. *Journal of Infection*. 2020; S0163445320306952. doi:10.1016/j.jinf.2020.10.035
297. Nsn G, C J, R M, P R, N L, Sn L, et al. High rates of SARS-CoV-2 seropositivity in nursing home residents. *Journal of Infection*. 2020; S0163445320305740. doi:10.1016/j.jinf.2020.08.040
298. Davis KAS, Carr E, Leightley D, Vitiello V, Bergin-Cartwright G, Lavelle G, et al. Indicators of past COVID-19 infection status: Findings from a large occupational cohort of staff and postgraduate research students from a UK university. medRxiv. 2021; 2020.12.07.20245183. doi:10.1101/2020.12.07.20245183
299. England PH. National COVID-19 surveillance report: 9 July 2020 (week 28). Public Health England; 2020 Jul. Available: <https://www.gov.uk/government/publications/national-covid-19-surveillance-reports>
300. Gulraj P. After in-house GHA screening programme, Govt rethinks its plans for anti-body tests. *Gibraltar Chronicle*. 17 Jun 2020. Available: <https://www.chronicle.gi/after-in-house-gha-screening-programme-govt-rethinks-its-plans-for-anti-body-tests/>. Accessed 13 Mar 2021.
301. Lumley SF, Eyre DW, McNaughton AL, Howarth A, Hoosdally S, Hatch SB, et al. SARS-CoV-2 antibody prevalence, titres and neutralising activity in an antenatal cohort, United Kingdom, 14 April to 15 June 2020. *Eurosurveillance*. 2020;25: 2001721. doi:10.2807/1560-7917.ES.2020.25.41.2001721
302. Jones CR, Hamilton FW, Thompson A, Morris TT, Moran E. SARS-CoV-2 IgG seroprevalence in healthcare workers and other staff at North Bristol NHS Trust: A sociodemographic analysis. *Journal of Infection*. 2020;0. doi:10.1016/j.jinf.2020.11.036
303. Favara DM, McAdam K, Cooke A, Bordessa-Kelly A, Budriunaite I, Bossingham S, et al. SARS-CoV-2 antigen and antibody prevalence among UK staff working with cancer patients during the COVID-19 pandemic. medRxiv. 2020; 2020.09.18.20197590. doi:10.1101/2020.09.18.20197590
304. Pallett SJC, Rayment M, Patel A, Fitzgerald-Smith SAM, Denny SJ, Charani E, et al. Point-of-care serological assays for delayed SARS-CoV-2 case identification among health-care workers in the UK: A prospective multicentre cohort study. *The Lancet Respiratory Medicine*. 2020;8: 885–894. doi:10.1016/S2213-2600(20)30315-5
305. Baxendale HE, Wells D, Gronlund J, Nadesalingam A, Paloniemi M, Carnell G, et al. Critical care workers have lower seroprevalence of SARS-CoV-2 IgG compared with non-patient facing staff in first wave of COVID19. medRxiv. 2020; 2020.11.12.20145318. doi:10.1101/2020.11.12.20145318

306. Arif M, Maaref Doost M. Prevalence of COVID-19 Among Typical Ambulatory Care Patients in a District General Hospital in the United Kingdom. *Cureus*. 2020 [cited 15 May 2021]. doi:10.7759/cureus.11398
307. Razvi S, Oliver R, Moore J, Beeby A. Exposure of hospital healthcare workers to the novel coronavirus (SARS-CoV-2). *Clin Med*. 2020;20: e238–e240. doi:10.7861/clinmed.2020-0566
308. Favara DM, Cooke A, Doffinger R, McAdam K, Corrie P, Ainsworth NL. COVID-19 Serology in Oncology Staff Study: Understanding SARS-CoV-2 in the Oncology Workforce. *Clin Oncol (R Coll Radiol)*. 2021;33: e61–e63. doi:10.1016/j.clon.2020.07.015
309. Bampoe S, Lucas DN, Neall G, Sceales P, Aggarwal R, Caulfield K, et al. A cross-sectional study of immune seroconversion to SARS-CoV-2 in frontline maternity health professionals. *Anaesthesia*. 2020;75: 1614–1619. doi:10.1111/anae.15229
310. Grant JJ, Wilmore SMS, McCann NS, Donnelly O, Lai RWL, Kinsella MJ, et al. Seroprevalence of SARS-CoV-2 antibodies in healthcare workers at a London NHS Trust. *Infection Control & Hospital Epidemiology*. 2020/08/04 ed. 2020; 1–3. doi:10.1017/ice.2020.402
311. McCafferty K, Davari M, Price K, Rajakariar R, Cove-Smith A, Forbes SH. COVID-19 prevalence and seroconversion in an urban hemodialysis unit in the United Kingdom. *Hemodialysis International*. 2020;25: 137–139. doi:10.1111/hdi.12883
312. Steel K, Davies B. Coronavirus (COVID-19) Infection Survey: Characteristics of people testing positive for COVID-19 in England and antibody data for the UK - Office for National Statistics. Office for National Statistics; 2020 Jun p. 12. Available: <https://www.ons.gov.uk/peoplepopulationandcommunity/healthandsocialcare/conditionsanddiseases/articles/coronaviruscovid19infectionsinthecommunityinengland/november2020>
313. Wells PM, Doores KM, Couvreur S, Martin Martinez R, Seow J, Graham C, et al. Estimates of the rate of infection and asymptomatic COVID-19 disease in a population sample from SE England. *medRxiv*. 2020; 2020.07.29.20162701. doi:10.1101/2020.07.29.20162701
314. Ladhani SN, Andrews N, Aiano F, Baawuah F, Amin-Chowdhury Z, Brown KE, et al. Secondary attack rate and family clustering of SARS-CoV-2 infection in children of healthcare workers with confirmed COVID-19. *Clinical Infectious Diseases*. 2020 [cited 14 Mar 2021]. doi:10.1093/cid/ciaa1737
315. Khalil A, Hill R, Wright A, Ladhani S, O'Brien P. SARS-CoV-2-Specific Antibody Detection in Healthcare Workers in a UK Maternity Hospital: Correlation With SARS-CoV-2 RT-PCR Results. *Clinical Infectious Diseases*. 2020 [cited 14 Nov 2020]. doi:10.1093/cid/ciaa893
316. Hughes EC, Amat JAR, Haney J, Parr YA, Logan N, Palmateer N, et al. SARS-CoV-2 serosurveillance in a patient population reveals differences in virus exposure and antibody-mediated immunity according to host demography and healthcare setting. *The Journal of Infectious Diseases*. 2020 [cited 31 Jan 2021]. doi:10.1093/infdis/jiaa788
317. Thompson CP, Grayson NE, Paton RS, Bolton JS, Lourenço J, Penman BS, et al. Detection of neutralising antibodies to SARS-CoV-2 to determine population exposure in Scottish blood donors between March and May 2020. *Eurosurveillance*. 2020;25: 2000685. doi:10.2807/1560-7917.ES.2020.25.42.2000685
318. Poulidakos D, Sinha S, Kalra PA. SARS-CoV-2 antibody screening in healthcare workers in a tertiary centre in North West England. *J Clin Virol*. 2020/07/07 ed. 2020;129: 104545–104545. doi:10.1016/j.jcv.2020.104545
319. England PH. National COVID-19 surveillance report: 21 August 2020 (week 34). Public Health England; 2020 Aug pp. 31–34. Available: <https://www.gov.uk/government/publications/national-covid-19-surveillance-reports>
320. England PH. National COVID-19 surveillance report: 28 August 2020 (week 35). Public Health England; 2020 Aug. Available: <https://www.gov.uk/government/publications/national-covid-19-surveillance-reports>

321. Shields AM, Faustini SE, Perez-Toledo M, Jossi S, Aldera EL, Allen JD, et al. SARS-CoV-2 seroconversion in health care workers. medRxiv. 2020; 2020.05.18.20105197. doi:10.1101/2020.05.18.20105197
322. Sikora K, Barwick I, Hamilton C. Serological prevalence of antibodies to SARS CoV-2 amongst cancer centre staff. medRxiv. 2020; 2020.05.16.20099408. doi:10.1101/2020.05.16.20099408
323. Ladhani SN, Jeffery-Smith A, Patel M, Janarthanan R, Fok J, Crawley-Boevey E, et al. High prevalence of SARS-CoV-2 antibodies in care homes affected by COVID-19: Prospective cohort study, England. EClinicalMedicine. 2020;28. doi:10.1016/j.eclinm.2020.100597
324. Houlihan CF, Vora N, Byrne T, Lewer D, Kelly G, Heaney J, et al. Pandemic peak SARS-CoV-2 infection and seroconversion rates in London frontline health-care workers. The Lancet. 2020;396: e6–e7. doi:10.1016/S0140-6736(20)31484-7
325. Malecki K, Nikodemova M, Schultz A, Walsh M, Bersch A, Sethi A, et al. Population Changes in Seroprevalence among a Statewide Sample in the United States. medRxiv. 2020; 2020.12.18.20248479. doi:10.1101/2020.12.18.20248479
326. Craver R. Wake Forest Baptist’s COVID-19 antibodies study expands to Triangle, eastern N.C. Winston-Salem Journal; 20 Dec 2020 [cited 6 Mar 2021]. Available: [https://journalnow.com/news/local/wake-forest-baptists-covid-19-antibodies-study-expands-to-triangle-eastern-n-c/article\\_b8e94704-3e1e-11eb-8742-470dc9941f17.html](https://journalnow.com/news/local/wake-forest-baptists-covid-19-antibodies-study-expands-to-triangle-eastern-n-c/article_b8e94704-3e1e-11eb-8742-470dc9941f17.html)
327. Stout RL, Rigatti SJ. The Silent Pandemic COVID-19 in the Asymptomatic Population. medRxiv. 2021 [cited 18 Jan 2021]. doi:doi.org/10.1101/2020.11.10.20215145
328. Jolley F. Lake, Sumter residents testing positive for COVID antibody remain below state average. dailycommercial; 3 Dec 2020 [cited 7 Mar 2021]. Available: <https://www.dailycommercial.com/story/news/2020/12/03/area-residents-covid-antibody-below-state-average/6475413002/>
329. Coffman B. Co-Immunity Project shows COVID-19 infection rate in Jefferson County increased tenfold since September | UofL News. UofLNews; 24 Nov 2020 [cited 8 Mar 2021]. Available: <https://www.uoflnews.com/post/uofltoday/co-immunity-project-shows-covid-19-infection-rate-in-jefferson-county-increased-tenfold-since-september/>
330. Godbout EJ, Pryor R, Harmon M, Montpetit A, Greer J, Bachmann LM, et al. Severe acute respiratory coronavirus virus 2 (SARS-CoV-2) seroprevalence among healthcare workers in a low prevalence region. Infection Control & Hospital Epidemiology. 2020; 1–3. doi:10.1017/ice.2020.1374
331. Bajema KL, Wiegand RE, Cuffe K, Patel SV, Iachan R, Lim T, et al. Estimated SARS-CoV-2 Seroprevalence in the US as of September 2020. JAMA Intern Med. 2020 [cited 20 Jan 2021]. doi:10.1001/jamainternmed.2020.7976
332. Maricopa County COVID-19 serosurvey results reported. Fountain Hills Times; [cited 6 Mar 2021]. Available: [https://www.fhtimes.com/news/local\\_news/maricopa-county-covid-19-serosurvey-results-reported/article\\_6be4ab0a-3983-11eb-ab22-a3b73c8957c7.html](https://www.fhtimes.com/news/local_news/maricopa-county-covid-19-serosurvey-results-reported/article_6be4ab0a-3983-11eb-ab22-a3b73c8957c7.html)
333. Jimenez-Kurlander L, Antal Z, DeRosa A, Diotallevi D, Pottenger E, Wilson N, et al. COVID-19 in pediatric survivors of childhood cancer and hematopoietic cell transplantation from a single center in New York City. Pediatr Blood Cancer. 2020;68. doi:10.1002/pbc.28857
334. Demonbreun AR, McDade TW, Pesce L, Vaught LA, Reiser NL, Bogdanovic E, et al. Patterns and persistence of SARS-CoV-2 IgG antibodies in a US metropolitan site. medRxiv. 2020; 2020.11.17.20233452. doi:10.1101/2020.11.17.20233452
335. Halbrook M, Gadoth A, Martin-Blais R, Grey A, Contreras D, Kashani S, et al. Incidence of SARS-CoV-2 infection among asymptomatic frontline health workers in Los Angeles County, California. medRxiv. 2020; 2020.11.18.20234211. doi:10.1101/2020.11.18.20234211

336. Bruckner TA, Parker DM, Bartell SM, Vieira VM, Khan S, Noymer A, et al. Estimated seroprevalence of SARS-CoV-2 antibodies among adults in Orange County, California. *Scientific Reports*. 2021;11: 3081. doi:10.1038/s41598-021-82662-x
337. Brant-Zawadzki M, Fridman D, Robinson PA, Zahn M, Chau C, German R, et al. Prevalence and Longevity of SARS-CoV-2 Antibodies Among Health Care Workers. *Open Forum Infectious Diseases*. 2021;8. doi:10.1093/ofid/ofab015
338. Sabourin KR, Schultz J, Romero J, Lamb MM, Larremore D, Morrison TE, et al. Risk Factors of SARS-CoV-2 Antibodies in Arapahoe County First Responders - the COVID-19 Arapahoe SErosurveillance Study (CASES) Project. *J Occup Environ Med*. 2020. doi:10.1097/JOM.0000000000002099
339. Heim M. Wisconsin COVID-19: Less than 2% of state population have antibodies. *Post Crescent*. 5 Oct 2020. Available: <https://www.postcrescent.com/story/news/2020/10/05/wisconsin-covid-19-less-than-2-of-state-population-have-antibodies/3457334001/>
340. Coffman B. New Co-Immunity Project data show COVID-19 infection among health care workers may be lower than the general population | UofL News. *UofLNews*; 24 Aug 2020 [cited 8 Mar 2021]. Available: <http://www.uoflnews.com/post/uofltoday/new-co-immunity-project-data-show-covid-19-infection-among-health-care-workers-may-be-lower-than-the-general-population/>
341. Feehan AK, Velasco C, Fort D, Burton JH, Price-Haywood EG, Katzmarzyk PT, et al. Racial and Workplace Disparities in Seroprevalence of SARS-CoV-2, Baton Rouge, Louisiana, USA. *Emerg Infect Dis*. 2021;27: 314–317. doi:10.3201/eid2701.203808
342. Vassallo RR, Bravo MD, Dumont LJ, Hazegh K, Kamel H. Seroprevalence of Antibodies to SARS-CoV-2 in US Blood Donors. *medRxiv*. 2020; 2020.09.17.20195131. doi:10.1101/2020.09.17.20195131
343. Azzi Y, Parides M, Alani O, Loarte-Campos P, Bartash R, Forest S, et al. COVID-19 infection in kidney transplant recipients at the epicenter of pandemics. *Kidney International*. 2020;98: 1559–1567. doi:10.1016/j.kint.2020.10.004
344. Nicholson L, McLawhon RW, Kurian S, Fitzgerald RL, Case J, Marsh C, et al. Healthcare worker seroconversion for SARS-CoV-2 at two large health systems in San Diego. *American Journal of Infection Control*. 2020;0. doi:10.1016/j.ajic.2020.12.017
345. Spencer BR, Foster GA, Xu M, Dodd RY, Haynes JM, Groves J, et al. COVID-19 Antibody Testing in Blood Donors: Prevalence, Symptoms, and Suitability for Convalescent Plasma Donation. *AABB*; 2020. Available: <https://aabb.confex.com/aabb/2020/meetingapp.cgi/Paper/8581>
346. Yamaki J, Peled H, Mathews S, Park D, Firoozi M, Smith K, et al. Seroprevalence of Novel Coronavirus SARS-CoV-2 at a Community Hospital Emergency Department and Outpatient Laboratory in Northern Orange County, California. *J Racial and Ethnic Health Disparities*. 2020 [cited 20 Jan 2021]. doi:10.1007/s40615-020-00918-0
347. Haizler-Cohen L, Davidov A, Blitz MJ, Fruhman G. Severe acute respiratory syndrome coronavirus 2 antibodies in pregnant women admitted to labor and delivery units. *American Journal of Obstetrics & Gynecology*. 2020;0. doi:10.1016/j.ajog.2020.09.022
348. Klawiter E, Smith J, Brewer K, Stockel K, Fischinger S, Luedemann C, et al. Low prevalence of SARS-COV-2 antibodies in people with multiple sclerosis residing in massachusetts. *Mult Scler*. 2020;26: 43–117. doi:10.1177/1352458520974938
349. Mahajan S, Srinivasan R, Redlich CA, Huston SK, Anastasio KM, Cashman L, et al. Seroprevalence of SARS-CoV-2-Specific IgG Antibodies Among Adults Living in Connecticut: Post-Infection Prevalence (PIP) Study. *Am J Med*. 2020. doi:10.1016/j.amjmed.2020.09.024
350. Rob McMillan. 6 percent of Riverside County residents had COVID-19, according to antibody study. *ABC News*. 29 Jul 2020. Available: <https://abc7.com/riverside-county-covid-update-coronavirus-ie-covid-19/6340600/>

351. Lopez L, Nguyen T, Weber G, Kleimola K, Bereda M, Liu Y, et al. Seroprevalence of anti-SARS-CoV-2 IgG Antibodies in the Staff of a Public School System in the Midwestern United States. medRxiv. 2020; 2020.10.23.20218651. doi:10.1101/2020.10.23.20218651
352. Julie Zauzmer. D.C. Has tested 13,706 blood samples. Only 809 carried coronavirus antibodies. The Washington Post. 15 Jul 2020. Available: <https://www.washingtonpost.com/dc-md-va/2020/07/15/dc-health-lab-has-tested-13706-blood-samples-only-809-people-carried-coronavirus-antibodies/>
353. Jin DK, Nesbitt DJ, Yang J, Chen H, Horowitz J, Jones M, et al. Seroprevalence of Anti-SARS-CoV-2 Antibodies in a Cohort of New York City Metro Blood Donors using Multiple SARS-CoV-2 Serological Assays: Implications for Controlling the Epidemic and “Reopening.” medRxiv. 2020; 2020.11.06.20220087. doi:10.1101/2020.11.06.20220087
354. Reuben J, Sherman A, Ellison JA, Gunn JKL, Tran A, McCarroll M, et al. SARS-CoV-2 Seroprevalence among First Responders in the District of Columbia, May – July 2020. medRxiv. 2020; 2020.11.25.20225490. doi:10.1101/2020.11.25.20225490
355. Kaufman HW, Chen Z, Meyer WA, Wohlgemuth JG. Insights from Patterns of SARS-CoV-2 Immunoglobulin G Serology Test Results from a National Clinical Laboratory, United States, March–July 2020. Population Health Management. 2020; pop.2020.0256. doi:10.1089/pop.2020.0256
356. Shah VP, Hainy CM, Swift MD, Breeher LE, Theel ES, Sampathkumar P. Unrecognized severe acute respiratory coronavirus virus 2 (SARS-CoV-2) seroprevalence among healthcare personnel in a low-prevalence area. Infect Control Hosp Epidemiol. 2020; 1–3. doi:10.1017/ice.2020.1341
357. Mohr N, Harland K, Krishnadasan A, Santibanez S, Talan D. Diagnosed and Undiagnosed COVID-19 in US Emergency Department Health Care Personnel: A Cross-sectional Analysis. Annals of Emergency Medicine. 2020. doi:10.1016/j.annemergmed.2020.12.007
358. Dimcheff DE, Schildhouse RJ, Hausman MS, Vincent BM, Markovitz E, Chensue SW, et al. Seroprevalence of severe acute respiratory syndrome coronavirus-2 (SARS-CoV-2) infection among Veterans Affairs healthcare system employees suggests higher risk of infection when exposed to SARS-CoV-2 outside the work environment. Infection Control & Hospital Epidemiology. undefined/ed; 1–7. doi:10.1017/ice.2020.1220
359. Kamath K, Baum-Jones E, Jordan G, Haynes W, Waitz R, Shon J, et al. Prevalence of antibodies to SARS-CoV-2 in healthy blood donors in New York. medRxiv. 2020; 2020.10.19.20215368. doi:10.1101/2020.10.19.20215368
360. Childs J. Study reveals data on COVID-19 antibody prevalence in Ventura County. Ventura County Star. 30 Aug 2020. Available: <https://www.vcstar.com/story/news/2020/08/30/covid-19-data-coronavirus-antibodies-ventura-county/3436858001/>
361. Stadlbauer D, Tan J, Jiang K, Hernandez MM, Fabre S, Amanat F, et al. Repeated cross-sectional sero-monitoring of SARS-CoV-2 in New York City. Nature. 2020. doi:10.1038/s41586-020-2912-6
362. Freeman MC, Rapsinski GJ, Zilla ML, Wheeler SE. Immunocompromised Seroprevalence and Course of Illness of SARS-CoV-2 in One Pediatric Quaternary Care Center. Journal of the Pediatric Infectious Diseases Society. 2020;10: 426–431. doi:10.1093/jpids/piaa123
363. Walker AG, Sibbel S, Wade C, Moulton N, Marlowe G, Young A, et al. SARS-CoV-2 Antibody Seroprevalence Among Maintenance Dialysis Patients in the United States. Kidney Medicine. 2021;0. doi:10.1016/j.xkme.2021.01.002
364. Barrett ES, Horton DB, Roy J, Xia W, Greenberg P, Andrews T, et al. Risk Factors for Severe Acute Respiratory Syndrome Coronavirus 2 Infection in Hospital Workers: Results From a Screening Study in New Jersey, United States in Spring 2020. Open Forum Infectious Diseases. 2020;7. doi:10.1093/ofid/ofaa534



365. Wilkins JT, Gray EL, Wallia A, Hirschhorn LR, Zembower TR, Ho J, et al. Seroprevalence and Correlates of SARS-CoV-2 Antibodies in Health Care Workers in Chicago. *Open Forum Infectious Diseases*. 2021;8. doi:10.1093/ofid/ofaa582
366. Nailescu C, Khalid M, Wilson AC, Amanat F, Arregui S, Canas J, et al. Assessment of Seroconversion to SARS-CoV-2 in a Cohort of Pediatric Kidney Transplant Recipients. *Front Pediatr*. 2020;8. doi:10.3389/fped.2020.601327
367. Viglienzoni C. Early results of UVM research tracking COVID's spread in Vermont. WCAX3. 17 Jul 2020. Available: <https://www.wcax.com/2020/07/17/early-results-of-uvm-research-tracking-covids-spread-in-vermont/>. Accessed 13 Mar 2021.
368. Samore MH, Looney A, Orleans B, Greene T, Seegert N, Delgado JC, et al. SARS-CoV-2 seroprevalence and detection fraction in Utah urban populations from a probability-based sample. *medRxiv*. 2020; 2020.10.26.20219907. doi:10.1101/2020.10.26.20219907
369. Noval Rivas M, Ebinger JE, Wu M, Sun N, Braun J, Sobhani K, et al. BCG vaccination history associates with decreased SARS-CoV-2 seroprevalence across a diverse cohort of healthcare workers. *Journal of Clinical Investigation*. 2020 [cited 5 Jan 2021]. doi:10.1172/JCI145157
370. Patel MM, Thornburg NJ, Stubblefield WB, Talbot HK, Coughlin MM, Feldstein LR, et al. Change in Antibodies to SARS-CoV-2 Over 60 Days Among Health Care Personnel in Nashville, Tennessee. *JAMA*. 2020;324: 1781. doi:10.1001/jama.2020.18796
371. Baker JM, Nelson KN, Overton E, Lopman BA, Lash TL, Photakis M, et al. Quantification of Occupational and Community Risk Factors for SARS-CoV-2 Seropositivity Among Health Care Workers in a Large U.S. Health Care System. *Ann Intern Med*. 2021 [cited 19 Mar 2021]. doi:10.7326/M20-7145
372. McBride SM, Bundick K, Hubbeling H, Freret M, Modlin LA, Kamboj M, et al. Results and Impact of Intensive SARS-CoV-2 Testing in a High Volume, Outpatient Radiation Oncology Clinic in a Pandemic Hotspot. *medRxiv*. 2020; 2020.08.11.20172551. doi:10.1101/2020.08.11.20172551
373. Moscola J, Sembajwe G, Jarrett M, Farber B, Chang T, McGinn T, et al. Prevalence of SARS-CoV-2 Antibodies in Health Care Personnel in the New York City Area. *JAMA*. 2020;324: 893–895. doi:10.1001/jama.2020.14765
374. Barzin A, Schmitz JL, Rosin S, Sirpal R, Almond M, Robinette C, et al. SARS-CoV-2 Seroprevalence among a Southern U.S. Population Indicates Limited Asymptomatic Spread under Physical Distancing Measures. Schultz-Cherry S, editor. *mBio*. 2020;11: e02426–20, /mbio/11/5/mBio.02426–20.atom. doi:10.1128/mBio.02426-20
375. Staff SN. Study Finds Rate of Exposure to COVID-19 in Louisville Higher Than Expected. *Spectrum News 1*. 23 Jul 2020. Available: <https://spectrumnews1.com/ky/louisville/news/2020/07/23/uofl-coimmunity-project-phase-2-results>
376. Self WH, Tenforde MW, Stubblefield WB, Feldstein LR, Steingrub JS, Shapiro NI, et al. Seroprevalence of SARS-CoV-2 Among Frontline Health Care Personnel in a Multistate Hospital Network — 13 Academic Medical Centers, April–June 2020. *MMWR Morb Mortal Wkly Rep*. 2020;69: 1221–1226. doi:10.15585/mmwr.mm6935e2
377. Dodd RY, Xu M, Stramer SL. Change in Donor Characteristics and Antibodies to SARS-CoV-2 in Donated Blood in the US, June–August 2020. *JAMA*. 2020;324: 1677–1679. doi:10.1001/jama.2020.18598
378. Reifer J, Hayum N, Heszel B, Klagsbald I, Strevva VA. SARS-CoV-2 IgG antibody responses in New York City. *Diagnostic Microbiology and Infectious Disease*. 2020;98: 115128. doi:10.1016/j.diagmicrobio.2020.115128
379. Sutton M. Notes from the Field: Seroprevalence Estimates of SARS-CoV-2 Infection in Convenience Sample — Oregon, May 11–June 15, 2020. *MMWR Morb Mortal Wkly Rep*. 2020;69. doi:10.15585/mmwr.mm6932a4
380. Rebeiro PF, Levinson KJ, Jolly L, Kassens E, Dizikes GJ, Steece RS, et al. Prevalence of IgG antibodies against the severe acute respiratory syndrome coronavirus-2 among healthcare workers in Tennessee during May and June, 2020. *Infectious Diseases (except HIV/AIDS)*; 2020 Nov. doi:10.1101/2020.11.12.20230912

381. Anand S, Montez-Rath M, Han J, Bozeman J, Kerschmann R, Beyer P, et al. Prevalence of SARS-CoV-2 antibodies in a large nationwide sample of patients on dialysis in the USA: A cross-sectional study. *The Lancet*. 2020;396: 1335–1344. doi:10.1016/S0140-6736(20)32009-2
382. Akinbami LJ, Vuong N, Petersen LR, Sami S, Patel A, Lukacs SL, et al. SARS-CoV-2 Seroprevalence among Healthcare, First Response, and Public Safety Personnel, Detroit Metropolitan Area, Michigan, USA, May–June 2020 - Volume 26, Number 12—December 2020 - *Emerging Infectious Diseases journal - CDC*. 2020 [cited 15 May 2021]. doi:10.3201/eid2612.203764
383. Dora AV, Winnett A, Fulcher JA, Sohn L, Calub F, Lee-Chang I, et al. Using Serologic Testing to Assess the Effectiveness of Outbreak Control Efforts, Serial Polymerase Chain Reaction Testing, and Cohorting of Positive Severe Acute Respiratory Syndrome Coronavirus 2 Patients in a Skilled Nursing Facility. *Clinical Infectious Diseases*. 2020 [cited 14 Mar 2021]. doi:10.1093/cid/ciaa1286
384. Hynes M. Nevada COVID-19 infection rate 5 times higher, antibody tests show. *Las Vegas Review Journal*. 8 Jul 2020. Available: <https://www.google.com/url?rct=j&sa=t&url=https://www.reviewjournal.com/local/local-nevada/nevada-covid-19-infection-rate-5-times-higher-antibody-tests-show-2070094/&ct=ga&cd=CAAYBzIaOTBkZWE5ODk5NGU5MTg1OTpj206ZW46VVM&usg=AFQjCNGG4t16ng9mGv7ghgkKQP4Qm3hotw>. Accessed 13 Mar 2021.
385. Kari Harden. One new positive COVID-19 case in Routt County, antibody testing ramping up. *Steamboat Pilot & Today*. 14 Jun 2020. Available: <https://www.steamboatpilot.com/news/one-new-positive-covid-19-case-in-routt-county-antibody-testing-ramping-up/>
386. Yogo N, Greenwood KL, Thompson L, Wells PJ, Munday S, Smith TC, et al. Point prevalence survey to evaluate the seropositivity for coronavirus disease 2019 (COVID-19) among high-risk healthcare workers. *Infect Control Hosp Epidemiol*. 2020; 1–6. doi:10.1017/ice.2020.1370
387. Hogan CA, Gombar S, Wang H, Röltgen K, Shi R-Z, Holubar M, et al. Large-Scale Testing of Asymptomatic Healthcare Personnel for Severe Acute Respiratory Syndrome Coronavirus 2 - Volume 27, Number 1—January 2021 - *Emerging Infectious Diseases journal - CDC*. *Emerging Infectious Diseases*. 2020 [cited 22 Jan 2021]. doi:10.3201/eid2701.203892
388. Rudavsky S. Fairbanks study indicates that 'virus has slowed its spread' in Indiana. *Indy Star*. 17 Jun 2020. Available: <https://www.indystar.com/story/news/health/2020/06/17/indiana-coronavirus-fairbanks-study-indicates-spread-has-slowed/3208509001/>. Accessed 13 Mar 2021.
389. Flannery DD, Gouma S, Dhudasia MB, Mukhopadhyay S, Pfeifer MR, Woodford EC, et al. SARS-CoV-2 seroprevalence among parturient women in Philadelphia. *Sci Immunol*. 2020;5: eabd5709. doi:10.1126/sciimmunol.abd5709
390. Addetia A, Crawford KHD, Dingens A, Zhu H, Roychoudhury P, Huang M-L, et al. Neutralizing Antibodies Correlate with Protection from SARS-CoV-2 in Humans during a Fishery Vessel Outbreak with a High Attack Rate. McAdam AJ, editor. *J Clin Microbiol*. 2020;58: e02107–20, /jcm/58/11/JCM.02107–20.atom. doi:10.1128/JCM.02107-20
391. Gray A. Prevalence Of COVID-19 Antibodies In Washoe Co. Expected To Be Low. 22 Jun 2020. Available: <https://www.kunr.org/post/prevalence-covid-19-antibodies-washoe-co-expected-be-low#stream/0>
392. Brunner WM, Hirabayashi L, Krupa NL, Scribani MB, Jenkins P, Clark SD, et al. Severe acute respiratory coronavirus virus 2 (SARS-CoV-2) IgG results among healthcare workers in a rural upstate New York hospital system. *Infection Control & Hospital Epidemiology*. 2020; 1–4. doi:10.1017/ice.2020.1296
393. Steve Ohnesorge. Antibody testing continues in Burke County. *WBTV*. 29 May 2020. Available: <https://www.wbvtv.com/2020/05/29/antibody-testing-continues-burke-county/>

394. Sims MD, Maine GN, Childers KL, Podolsky RH, Voss DR, Berkiw-Scenna N, et al. COVID-19 seropositivity and asymptomatic rates in healthcare workers are associated with job function and masking. *Clin Infect Dis*. 2020. doi:10.1093/cid/ciaa1684
395. Nicole Hayden. Coachella Valley far from COVID-19 herd immunity, preliminary antibody test results show. *Desert Sun*. 29 May 2020. Available: [https://www.google.com/url?rct=j&sa=t&url=https://www.desertsun.com/story/news/health/2020/05/29/coachella-valley-far-covid-19-herd-immunity-preliminary-antibody-tests-show/5280021002/&ct=ga&cd=CAAYKzIaOTBkZWE5ODk5NGU5MTg1OTpjb206ZW46VVM&usg=AFQjCNFQxOqwjTX2Kz2\\_mnj1RV7Upa8rEg](https://www.google.com/url?rct=j&sa=t&url=https://www.desertsun.com/story/news/health/2020/05/29/coachella-valley-far-covid-19-herd-immunity-preliminary-antibody-tests-show/5280021002/&ct=ga&cd=CAAYKzIaOTBkZWE5ODk5NGU5MTg1OTpjb206ZW46VVM&usg=AFQjCNFQxOqwjTX2Kz2_mnj1RV7Upa8rEg)
396. Liu F, Nguyen M, Vijayakumar P, Kaplan A, Meir A, Dai Y, et al. Newborn Dried Blood Spots for Serologic Surveys of COVID-19. *Pediatric Infectious Disease Journal*. 2020;39: e454–e456. doi:10.1097/INF.0000000000002918
397. Osher G, Lamb CC, Ibarra Y, Erickson-Samson D. Observational study of SARS-CoV-2 antibody immune response in a cohort of patients at a North Suburban Chicago, Illinois, in a physician’s practice. *LymphoSign Journal*. 2020;7: 104–108. doi:10.14785/lymphosign-2020-0007
398. Shomik Mukherjee. 1% of early Humboldt County coronavirus tests show antibodies. *Times Standard*. 2 Jun 2020. Available: <https://www.times-standard.com/2020/06/02/1-of-early-humboldt-county-coronavirus-tests-show-antibodies/>
399. Stavert R, Meydani-Korb A, Leon D de, Osgood R, Blau J, Luu T. Evaluation of SARS-CoV-2 antibodies in 24 patients presenting with chilblains-like lesions during the COVID-19 pandemic. *Journal of the American Academy of Dermatology*. 2020;83: 1753–1755. doi:10.1016/j.jaad.2020.08.049
400. Ahmad K, Rezvanizadeh V, Dahal S, Kinninger A, Ghanem AK, Lakshmanan S, et al. COVID-19 IgG/IgM antibody testing in Los Angeles County, California. *Eur J Clin Microbiol Infect Dis*. 2020 [cited 19 Jan 2021]. doi:10.1007/s10096-020-04111-3
401. Jackson A. Almost everyone at one Michigan prison tests positive for COVID-19 antibodies. *Detroit Free Press*. 28 May 2020. Available: [https://www.petoskeynews.com/news/state-region/almost-everyone-at-one-michigan-prison-tests-positive-for-covid-19-antibodies/article\\_423c1ef0-a018-5b50-b746-c93fcb82f71f.html](https://www.petoskeynews.com/news/state-region/almost-everyone-at-one-michigan-prison-tests-positive-for-covid-19-antibodies/article_423c1ef0-a018-5b50-b746-c93fcb82f71f.html). Accessed 13 Mar 2021.
402. Staletovich J. South Florida Cities Begin Testing Employees For COVID-19 Antibodies. *WLRN*. 22 May 2020. Available: <https://www.wlrn.org/health-care/2020-05-22/south-florida-cities-begin-testing-employees-for-covid-19-antibodies>. Accessed 13 Mar 2021.
403. Leidner R, Frary A, Cramer J, Ball D, Weerasinghe R, Schmidt M, et al. Longitudinal SARS-CoV-2 serosurveillance of over ten thousand health care workers in the Providence Oregon cohort. *medRxiv*. 2020; 2020.08.16.20176107. doi:10.1101/2020.08.16.20176107
404. Assessing Cytokine Profiles and COVID Serology in Patients on Immunosuppression to Guide Care Recommendations. *ACR Meeting Abstracts*; [cited 4 Feb 2021]. Available: <https://acrabstracts.org/abstract/assessing-cytokine-profiles-and-covid-serology-in-patients-on-immunosuppression-to-guide-care-recommendations/>
405. Shukla V, Lau CSM, Towns M, Mayer J, Kalkbrenner K, Beuerlein S, et al. COVID-19 Exposure Among First Responders in Arizona. *Journal of Occupational and Environmental Medicine*. 2020;62. Available: [https://journals.lww.com/joem/Fulltext/2020/12000/COVID\\_19\\_Exposure\\_Among\\_First\\_Responders\\_in.1.aspx](https://journals.lww.com/joem/Fulltext/2020/12000/COVID_19_Exposure_Among_First_Responders_in.1.aspx)
406. Rosser JJ, Röltgen K, Dymock M, Shepard J, Martin A, Hogan CA, et al. Severe acute respiratory coronavirus virus 2 (SARS-CoV-2) seroprevalence in healthcare personnel in northern California early in the coronavirus disease 2019 (COVID-19) pandemic. *Infection Control & Hospital Epidemiology*. 2020; 1–7. doi:10.1017/ice.2020.1358
407. Alfini M. Antibody tests for coronavirus so far trend overwhelmingly negative. *WKOW*. 20 May 2020. Available: <https://wkow.com/2020/05/20/antibody-tests-for-coronavirus-so-far-trend-overwhelmingly-negative/>. Accessed 13 Mar 2021.

408. Montgomery J. Iowa begins to release serology test results, showing greater local spread of COVID-19. *Telegraph Herald*. 20 May 2020. Available: [https://www.telegraphherald.com/coronavirus/article\\_b5f56348-317d-5f49-abe-0e7cff653cbb.html](https://www.telegraphherald.com/coronavirus/article_b5f56348-317d-5f49-abe-0e7cff653cbb.html). Accessed 13 Mar 2021.
409. Geraci L. Antibody tests show just 2% exposure rate to COVID-19. *The Lancaster News*. 23 May 2020. Available: <https://www.thelancasternews.com/content/antibody-tests-show-just-2-exposure-rate-covid-19>
410. Tarabichi Y, Watts B, Collins T, Margolius D, Avery A, Gunzler D, et al. SARS-CoV-2 Infection among Serially Tested Emergency Medical Services Workers. *Prehospital Emergency Care*. 2020;0: 1–7. doi:10.1080/10903127.2020.1831668
411. Mughal MS, Kaur IP, Patton CD, Mikhail NH, Vareechon C, Granet KM. The prevalence of severe acute respiratory coronavirus virus 2 (SARS-CoV-2) IgG antibodies in intensive care unit (ICU) healthcare personnel (HCP) and its implications—a single-center, prospective, pilot study. *Infection Control & Hospital Epidemiology*. 2020/06/12 ed. 2020; 1–2. doi:10.1017/ice.2020.298
412. McLaughlin CC, Doll MK, Morrison KT, McLaughlin WL, O'Connor T, Sholukh AM, et al. High Community SARS-CoV-2 Antibody Seroprevalence in a Ski Resort Community, Blaine County, Idaho, US. Preliminary Results. *medRxiv*. 2020; 2020.07.19.20157198. doi:10.1101/2020.07.19.20157198
413. Morris CR, Camacho-Gonzalez A, Chen C, Heilman S, Iyer S, Mantus G, et al. 321 Prevalence of SARS-CoV-2 Antibodies in Pediatric Health Care Workers in Atlanta, Georgia. *Annals of Emergency Medicine*. 2020;76: S124–S125. doi:10.1016/j.annemergmed.2020.09.336
414. Feehan AK, Fort D, Garcia-Diaz J, Price-Haywood EG, Velasco C, Sapp E, et al. Seroprevalence of SARS-CoV-2 and Infection Fatality Ratio, Orleans and Jefferson Parishes, Louisiana, USA, May 2020. *Emerg Infect Dis*. 2020;26: 2765–2768. doi:10.3201/eid2611.203029
415. Meyer M. New COVID-19 antibody testing in Winona gives health officials a better picture of the spread. *News 8000*. 15 May 2020. Available: <https://www.news8000.com/new-covid-19-antibody-testing-in-winona-gives-health-officials-a-better-picture-of-the-spread/>. Accessed 13 Mar 2021.
416. Dietrich ML, Norton EB, Elliott D, Smira AR, Rouelle JA, Bond NG, et al. SARS-CoV-2 Seroprevalence Rates of Children in Louisiana During the State Stay at Home Order. *medRxiv*. 2020; 2020.07.07.20147884. doi:10.1101/2020.07.07.20147884
417. Boston C of. RESULTS RELEASED FOR ANTIBODY AND COVID-19 TESTING OF BOSTON RESIDENTS. City of Boston. 18 May 2020. Available: <https://www.boston.gov/news/results-released-antibody-and-covid-19-testing-boston-residents>
418. Parker-Magyar A. Few among Long Hill first responders test positive for COVID-19 antibodies. *Echoes Sentinel News*. 1 Jun 2020. Available: [https://www.google.com/url?rct=j&sa=t&url=https://www.newjerseyhills.com/echoes-sentinel/news/few-among-long-hill-first-responders-test-positive-for-covid-19-antibodies/article\\_007ac367-b3b2-5375-b471-f0a817998f62.html&ct=ga&cd=CAAYFDIaOTBkZWE5ODk5NGU5MTg1OTpjb206ZW46VVM&usg=AFQjCNHWg839bXiyzOxO1Y7-QOECGMRCMw](https://www.google.com/url?rct=j&sa=t&url=https://www.newjerseyhills.com/echoes-sentinel/news/few-among-long-hill-first-responders-test-positive-for-covid-19-antibodies/article_007ac367-b3b2-5375-b471-f0a817998f62.html&ct=ga&cd=CAAYFDIaOTBkZWE5ODk5NGU5MTg1OTpjb206ZW46VVM&usg=AFQjCNHWg839bXiyzOxO1Y7-QOECGMRCMw)
419. Iwuji K, Islam E, Berdine G, Nugent K, Test V, Tijerina A. Prevalence of Coronavirus Antibody Among First Responders in Lubbock, Texas. *J Prim Care Community Health*. 2020 Jan-Dec;11: 2150132720971390. doi:10.1177/2150132720971390
420. Angeles CL. LA County 'Still Far Away From Herd Immunity' New Antibody Numbers Show. *CBS Los Angeles*. 20 May 2020. Available: <https://losangeles.cbslocal.com/2020/05/20/la-county-still-far-away-from-herd-immunity-new-antibody-numbers-show/>. Accessed 13 Mar 2021.
421. Nesbitt DJ, Jin D, Hogan JW, Chan PA, Simon MJ, Vargas M, et al. Low Seroprevalence of SARS-CoV-2 in Rhode Island Blood Donors Determined using Multiple Serological Assay Formats. *medRxiv*. 2020; 2020.07.20.20157743. doi:10.1101/2020.07.20.20157743

422. Tilley K, Ayvazyan V, Martinez L, Nanda N, Kawaguchi ES, O’Gorman M, et al. A Cross-Sectional Study Examining the Seroprevalence of Severe Acute Respiratory Syndrome Coronavirus 2 Antibodies in a University Student Population. *Journal of Adolescent Health*. 2020;67: 763–768. doi:10.1016/j.jadohealth.2020.09.001
423. Hunter BR, Dbeibo L, Weaver CS, Beeler C, Saysana M, Zimmerman MK, et al. Seroprevalence of severe acute respiratory coronavirus virus 2 (SARS-CoV-2) antibodies among healthcare workers with differing levels of coronavirus disease 2019 (COVID-19) patient exposure. *Infection Control & Hospital Epidemiology*. 2020/08/03 ed. 2020; 1–2. doi:10.1017/ice.2020.390
424. Ripperger TJ, Uhrlaub JL, Watanabe M, Wong R, Castaneda Y, Pizzato HA, et al. Orthogonal SARS-CoV-2 Serological Assays Enable Surveillance of Low-Prevalence Communities and Reveal Durable Humoral Immunity. *Immunity*. 2020;53: 925–933.e4. doi:10.1016/j.immuni.2020.10.004
425. Racine-Brzostek SE, Yang HS, Chadburn A, Orlander D, An A, Campion TR, et al. COVID-19 Viral and Serology Testing in New York City Health Care Workers. *American Journal of Clinical Pathology*. 2020;154: 592–595. doi:10.1093/ajcp/aqaa142
426. Regan T. Fellowship Village Benefits from Covid-19 Antibody Tests. *Senior Housing News*. 24 Jun 2020. Available: <https://seniorhousingnews.com/2020/06/24/fellowship-village-benefits-from-covid-19-antibody-tests-juniper-plans-pilot/>. Accessed 13 Mar 2021.
427. Sydney ER, Kishore P, Laniado I, Rucker LM, Bajaj K, Zinaman MJ. Antibody evidence of SARS-CoV-2 infection in healthcare workers in the Bronx. *Infection Control & Hospital Epidemiology*. 2020/08/26 ed. 2020;41: 1348–1349. doi:10.1017/ice.2020.437
428. Bajema KL, Dahlgren FS, Lim TW, Bestul N, Biggs HM, Tate JE, et al. Comparison of Estimated SARS-CoV-2 Seroprevalence through Commercial Laboratory Residual Sera Testing and a Community Survey. *Clinical Infectious Diseases*. 2020 [cited 22 Jan 2021]. doi:10.1093/cid/ciaa1804
429. Biggs HM, Harris JB, Breakwell L, Dahlgren FS, Abedi GR, Szablewski CM, et al. Estimated Community Seroprevalence of SARS-CoV-2 Antibodies — Two Georgia Counties, April 28–May 3, 2020. *MMWR Morb Mortal Wkly Rep*. 2020;69: 965–970. doi:10.15585/mmwr.mm6929e2
430. Menachemi N, Yiannoutsos CT, Dixon BE, Duszynski TJ, Fadel WF, Wools-Kaloustian KK, et al. Population Point Prevalence of SARS-CoV-2 Infection Based on a Statewide Random Sample — Indiana, April 25–29, 2020. *MMWR Morb Mortal Wkly Rep*. 2020;69: 960–964. doi:10.15585/mmwr.mm6929e1
431. Reagan N. Results show 2% of tested MUSC staff have COVID-19 antibodies. *WCSC*. 4 May 2020. Available: <https://www.live5news.com/2020/05/04/results-show-tested-musc-staff-have-covid-antibodies/>. Accessed 13 Mar 2021.
432. Venugopal U, Jilani N, Rabah S, Shariff MA, Jawed M, Batres AM, et al. SARS-CoV-2 seroprevalence among health care workers in a New York City hospital: A cross-sectional analysis during the COVID-19 pandemic. *International Journal of Infectious Diseases*. 2020;102: 63–69. doi:10.1016/j.ijid.2020.10.036
433. Jeremias A, Nguyen J, Levine J, Pollack S, Engellenner W, Thakore A, et al. Prevalence of SARS-CoV-2 Infection Among Health Care Workers in a Tertiary Community Hospital. *JAMA Internal Medicine*. 2020 [cited 15 Nov 2020]. doi:10.1001/jamainternmed.2020.4214
434. Cohen DE, Marlowe G, Contreras G, Sosa MA, Mendoza JM, Lenz O, et al. Assessment of a Laboratory-Based SARS-CoV-2 Antibody Test Among Hemodialysis Patients: A Quality Improvement Initiative. *medRxiv*. 2020; 2020.08.03.20163642. doi:10.1101/2020.08.03.20163642
435. Jeong JM, Radeos MS, Shee B, Kindschuh M, Hernandez C, Sasson C, et al. COVID-19 Seroconversion in Emergency Professionals at an Urban Academic Emergency Department in New York City. *Annals of Emergency Medicine*. 2020;76: 815–816. doi:10.1016/j.annemergmed.2020.06.038

436. Chamie G, Marquez C, Crawford E, Peng J, Petersen M, Schwab D, et al. Community Transmission of Severe Acute Respiratory Syndrome Coronavirus 2 Disproportionately Affects the Latinx Population During Shelter-in-Place in San Francisco. *Clinical Infectious Diseases*. 2020; ciaa1234. doi:10.1093/cid/ciaa1234
437. Rosenberg ES, Tesoriero JM, Rosenthal EM, Chung R, Barranco MA, Styer LM, et al. Cumulative incidence and diagnosis of SARS-CoV-2 infection in New York. *Annals of Epidemiology*. 2020;48: 23–29.e4. doi:10.1016/j.annepidem.2020.06.004
438. Zou J, Bretin A, Gewirtz A. Antibodies to SARS/CoV-2 in arbitrarily-selected Atlanta residents. medRxiv. 2020; 2020.05.01.20087478. doi:10.1101/2020.05.01.20087478
439. Bryan A, Pepper G, Wener MH, Fink SL, Morishima C, Chaudhary A, et al. Performance Characteristics of the Abbott Architect SARS-CoV-2 IgG Assay and Seroprevalence Testing in Idaho. medRxiv. 2020; 2020.04.27.20082362. doi:10.1101/2020.04.27.20082362
440. Lewis NM, Chu VT, Ye D, Conners EE, Gharpure R, Laws RL, et al. Household Transmission of SARS-CoV-2 in the United States. *Clinical Infectious Diseases*. 2020 [cited 16 Dec 2020]. doi:10.1093/cid/ciaa1166
441. Appa A, Takahashi S, Rodriguez-Barraquer I, Chamie G, Sawyer A, Duarte E, et al. Universal Polymerase Chain Reaction and Antibody Testing Demonstrate Little to No Transmission of Severe Acute Respiratory Syndrome Coronavirus 2 in a Rural Community. *Open Forum Infectious Diseases*. 2021;8. doi:10.1093/ofid/ofaa531
442. Payne DC, Smith-Jeffcoat SE, Nowak G, Chukwuma U, Geibe JR, Hawkins RJ, et al. SARS-CoV-2 Infections and Serologic Responses from a Sample of U.S. Navy Service Members - USS Theodore Roosevelt, April 2020. *MMWR Morb Mortal Wkly Rep*. 2020;69: 714–721. doi:10.15585/mmwr.mm6923e4
443. Alessandro Sassoon. OMNI Healthcare’s COVID-19 antibody testing data for Brevard shows low rates of immunity. *Florida Today*. 24 Apr 2020. Available: <https://www.floridatoday.com/story/news/2020/04/24/omni-covid-19-immunity-testing-data-brevard-county-florida-antibody/3022571001/>
444. Dingens AS, Crawford KHD, Adler A, Steele SL, Lacombe K, Eguia R, et al. Serological identification of SARS-CoV-2 infections among children visiting a hospital during the initial Seattle outbreak. *Nature Communications*. 2020;11: 4378. doi:10.1038/s41467-020-18178-1
445. Kiefer MK, McKiever ME, Russo JR, Ma’ayeh M, Gee SE, Smith DD, et al. Exposure and seroconversion to severe acute respiratory syndrome coronavirus 2 among obstetrical healthcare providers following a contained outbreak. *American Journal of Obstetrics & Gynecology*. 2020;223: 601–603.e2. doi:10.1016/j.ajog.2020.06.029
446. Morrison R. CrushTheCurveIdaho finds small population with antibodies: ‘We are far from herd immunity’. 22 Apr 2020. Available: <https://idahonews.com/news/coronavirus/crushthecurveidaho-finds-small-population-with-antibodies-we-are-far-from-herd-immunity>. Accessed 13 Mar 2021.
447. Morcuende M, Guglielminotti J, Landau R. Anesthesiologists’ and Intensive Care Providers’ Exposure to COVID-19 Infection in a New York City Academic Center: A Prospective Cohort Study Assessing Symptoms and COVID-19 Antibody Testing. *Anesth Analg*. 2020;131: 669–676. doi:10.1213/ANE.0000000000005056
448. McCormack J. What the Coronavirus-Antibody Study of Major League Baseball Tells Us. *National Review*. 11 May 2020. Available: <https://www.nationalreview.com/2020/05/coronavirus-antibody-study-major-league-baseball-herd-immunity/>
449. Blake Paterson. Takeaways from coronavirus antibody tests: Infections might be more widespread than cases suggest. *The Advocate*. 28 Apr 2020. Available: [https://www.theadvocate.com/baton\\_rouge/news/coronavirus/article\\_b499efa0-8983-11ea-a3f1-af936ecb1d2c.html](https://www.theadvocate.com/baton_rouge/news/coronavirus/article_b499efa0-8983-11ea-a3f1-af936ecb1d2c.html)
450. Stock AD, Bader ER, Cezayirli P, Inocencio J, Chalmers SA, Yassari R, et al. COVID-19 Infection Among Healthcare Workers: Serological Findings Supporting Routine Testing. *Front Med*. 2020;7. doi:10.3389/fmed.2020.00471

451. Madsen T, Levin N, Niehus K, Law K, Mayer J, Chapman M, et al. Prevalence of IgG antibodies to SARS-CoV-2 among emergency department employees. *Am J Emerg Med.* 2020. doi:10.1016/j.ajem.2020.04.076
452. Caban-Martinez AJ, Schaefer-Solle N, Santiago K, Louzado-Feliciano P, Brotons A, Gonzalez M, et al. Epidemiology of SARS-CoV-2 antibodies among firefighters/paramedics of a US fire department: A cross-sectional study. *Occup Environ Med.* 2020;77: 857–861. doi:10.1136/oemed-2020-106676
453. Naranbhai V, Chang CC, Beltran WFG, Miller TE, Astudillo MG, Villalba JA, et al. High Seroprevalence of Anti-SARS-CoV-2 Antibodies in Chelsea, Massachusetts. *The Journal of Infectious Diseases.* 2020;222: 1955–1959. doi:10.1093/infdis/jiaa579
454. Sood N, Simon P, Ebner P, Eichner D, Reynolds J, Bendavid E, et al. Seroprevalence of SARS-CoV-2–Specific Antibodies Among Adults in Los Angeles County, California, on April 10–11, 2020. *JAMA.* 2020;Published Online. doi:doi:10.1001/jama.2020.8279
455. Ng DL, Goldgof GM, Shy BR, Levine AG, Balcerak J, Bapat SP, et al. SARS-CoV-2 seroprevalence and neutralizing activity in donor and patient blood from the San Francisco Bay Area. *medRxiv.* 2020 [cited 15 May 2021]. doi:10.1101/2020.05.19.20107482
456. Goldberg SA, Lennerz J, Klompas M, Mark E, Pierce VM, Thompson RW, et al. Presymptomatic Transmission of Severe Acute Respiratory Syndrome Coronavirus 2 Among Residents and Staff at a Skilled Nursing Facility: Results of Real-time Polymerase Chain Reaction and Serologic Testing. *Clinical Infectious Diseases.* 2020 [cited 15 Nov 2020]. doi:10.1093/cid/ciaa991
457. Bendavid E, Mulaney B, Sood N, Shah S, Bromley-Dulfano R, Lai C, et al. COVID-19 antibody seroprevalence in Santa Clara County, California. *International Journal of Epidemiology.* 2021; dyab010. doi:10.1093/ije/dyab010
458. Mansour M, Leven E, Muellers K, Stone K, Mendu DR, Wajnberg A. Prevalence of SARS-CoV-2 Antibodies Among Healthcare Workers at a Tertiary Academic Hospital in New York City. *Journal of General Internal Medicine.* 2020;35: 2485–2486. doi:10.1007/s11606-020-05926-8
459. Anne Schuchat. Public Health Response to the Initiation and Spread of Pandemic COVID-19 in the United States, February 24–April 21, 2020. US Department of Health and Human Services/Centers for Disease Control and Prevention; 2020 May. Available: <https://www.cdc.gov/mmwr/volumes/69/wr/pdfs/mm6918e2-H.pdf>
460. McPherson TD, Ghinai I, Binder AM, Freeman BD, Hoskin Snelling C, Hunter JC, et al. Lack of Serologic Evidence of Infection Among Health Care Personnel and Other Contacts of First 2 Confirmed Patients With COVID-19 in Illinois, 2020. *Public Health Rep.* 2020;136: 88–96. doi:10.1177/0033354920966064
461. Chu V, Freeman-Ponder B, Lindquist S, Spitters C, Kawakami V, Dyal J, et al. Investigation and Serologic Follow-Up of Contacts of an Early Confirmed Case-Patient with COVID-19, Washington, USA. *Emerging Infectious Disease journal.* 2020;26: 1671. doi:10.3201/eid2608.201423
462. Basavaraju SV, Patton ME, Grimm K, Rasheed MAU, Lester S, Mills L, et al. Serologic testing of U.S. Blood donations to identify SARS-CoV-2-reactive antibodies: December 2019–January 2020. *Clinical Infectious Diseases.* 2020 [cited 20 Jan 2021]. doi:10.1093/cid/ciaa1785
463. Buss LF, Prete CA, Abraham CMM, Mendrone A, Salomon T, Almeida-Neto C de, et al. Three-quarters attack rate of SARS-CoV-2 in the Brazilian Amazon during a largely unmitigated epidemic. *Science.* 2021;371: 288–292. doi:10.1126/science.abe9728
464. Santena F, Lopes J, Perez M, Campana G, Levi J, Lopes F, et al. Seroconversion for SARS-CoV-2 in rheumatic patients on synthetic and biologics Disease Modifying Anti-Rheumatic Drugs in São Paulo, Brazil. 2020 [cited 23 Feb 2021]. doi:10.21203/rs.3.rs-97191/v1
465. Silva AAM da, Lima-Neto LG, Azevedo C de MPeS, Costa LMM da, Bragança MLBM, Filho AKDB, et al. Population-based seroprevalence of SARS-CoV-2 is more than halfway through the herd immunity threshold in the State of Maranhão, Brazil. *Public and Global Health;* 2020 Sep. doi:10.1101/2020.08.28.20180463

466. Oliveira LM da S, Tiyo BT, Silva LT da, Fonseca LAM, Rocha RC, Santos VA dos, et al. Prevalence of anti-SARS-CoV-2 antibodies in outpatients of a large public university hospital in Sao Paulo, Brazil. *Revista do Instituto de Medicina Tropical de São Paulo*. 2020;62. doi:10.1590/s1678-9946202062091
467. Silva VO, de Oliveira EL, Castejon MJ, Yamashiro R, Ahagon CM, López-Lopes GI, et al. Prevalence of antibodies against sars-cov-2 in professionals of a public health laboratory at são paulo, sp, brazil. *medRxiv*. 2020 [cited 15 May 2021]. doi:10.1101/2020.10.19.20213421
468. de Paula CC, Passos JPC, Shimoya-Bittencour W, de Lamare CAV, de Oliveira RG. PREVALENCE OF MOLECULAR AND SEROLOGICAL TESTS OF THE NEW CORONAVIRUS (SARS-CoV-2) IN CARLOS CHAGAS-SABIN LABORATORIES IN CUIABÁ. *medRxiv*. 2020 [cited 15 May 2021]. doi:10.1101/2020.10.26.20219683
469. de Melo MS, Borges LP, de Souza DRV, Martins AF, de Rezende Neto JM, Ribeiro AA, et al. Anti-SARS-CoV-2 IgM and IgG antibodies in health workers in Sergipe, Brazil. *Infectious Diseases (except HIV/AIDS)*; 2020 Sep. doi:10.1101/2020.09.24.20200873
470. Horta BL, Silveira MF, Barros AJD, Barros FC, Hartwig FP, Dias MS, et al. Prevalence of antibodies against SARS-CoV-2 according to socioeconomic and ethnic status in a nationwide Brazilian survey. *Rev Panam Salud Publica*. 2020;44: e135. doi:10.26633/RPSP.2020.135
471. Picon RV, Carreno I, da Silva AA, Mossmann M, Laste G, Domingues G de C, et al. Coronavirus disease 2019 population-based prevalence, risk factors, hospitalization, and fatality rates in southern Brazil. *International Journal of Infectious Diseases*. 2020;100: 402–410. doi:10.1016/j.ijid.2020.09.028
472. Vieira MA da CeS, Vieira CP de B, Borba A de S, Melo MC de C, Oliveira M de S, Melo RM, et al. Sequential serological surveys in the early stages of the coronavirus disease epidemic: Limitations and perspectives. *Rev Soc Bras Med Trop*. 2020;53: e20200351. doi:10.1590/0037-8682-0351-2020
473. Sales MJT, Kerr LRFS, Brizolara RV, Barreto IC de HC, Almeida RLF de, Goes PSA de, et al. Fernando de Noronha: How an island controlled the community transmission of COVID-19 in Brazil. *medRxiv*. 2020; 2020.10.22.20216010. doi:10.1101/2020.10.22.20216010
474. Confirma um estudo sobre a pandemia de Covid-19 em Biguaçu em gráficos. *Jornais em foco*; 2 Jun 2020 [cited 23 Apr 2021]. Available: <http://jbfoco.com.br/2020/06/confirma-um-estudo-sobre-a-pandemia-de-covid-19-em-biguaçu-em-gráficos/>
475. Costa SF, Giavina-Bianchi P, Buss L, Mesquita Peres CH, Rafael MM, dos Santos LGN, et al. SARS-CoV-2 seroprevalence and risk factors among oligo/asymptomatic healthcare workers(HCW): Estimating the impact of community transmission. *Clinical Infectious Diseases*. 2020 [cited 23 Jan 2021]. doi:10.1093/cid/ciaa1845
476. Chioro A, Calife K, Santos Barros CR dos, Martins LC, Calvo M, Estanislau E, et al. Covid-19 - COVID-19 em uma Região Metropolitana: Vulnerabilidade social e políticas públicas em contextos de desigualdades. 2020 [cited 26 Apr 2021]. doi:10.1590/SciELOPreprints.1270
477. Costa Gomes C, Cerutti Jr. C, Zandonade E, Noia Maciel EL, Carvalho de Alencar FE, Almada GL, et al. A population-based study of the prevalence of COVID-19 infection in Espírito Santo, Brazil: Methodology and results of the first stage. *medRxiv*. 2020 [cited 16 Jun 2020]. doi:10.1101/2020.06.13.20130559
478. Tess BH, Granato CFH, Alves MCGP, Pintao MC, Rizzatti E, Nunes MC, et al. SARS-CoV-2 seroprevalence in the municipality of Sao Paulo, Brazil, ten weeks after the first reported case. *medRxiv*. 2020 [cited 12 Nov 2020]. doi:10.1101/2020.06.29.20142331
479. Phillippe Watanabe. Nos bairros de SP mais afetados pela Covid-19, só 5% tiveram contato com o vírus. *Folha De S Paulo*. 17 May 2020. Available: <https://www1.folha.uol.com.br/equilibrioesaude/2020/05/nos-bairros-de-sp-mais-afetados-pela-covid-19-so-5-tiveram-contato-com-o-virus.shtml>



480. Silveira MF, Barros AJD, Horta BL, Pellanda LC, Victora GD, Dellagostin OA, et al. Population-based surveys of antibodies against SARS-CoV-2 in Southern Brazil. *Nat Med.* 2020;26: 1196–1199. doi:10.1038/s41591-020-0992-3
481. Borges LP, Martins AF, Melo MS de, Oliveira MGB de, Neto JM de R, Dósea MB, et al. Seroprevalence of SARS-CoV-2 IgM and IgG antibodies in an asymptomatic population in Sergipe, Brazil. *Revista Panamericana de Salud Pública.* 2020;44: 1. doi:10.26633/RPSP.2020.108
482. Ismael Amaral Silva PA, Ismael C, Marchon da Silva C, Domenge C. 1761P Universal screening of SARS-CoV-2 of oncology healthcare workers — a Brazilian experience. *Annals of Oncology.* 2020;31: S1024. doi:10.1016/j.annonc.2020.08.1825
483. Filho LA, Szwarcwald CL. Seroprevalence of anti-SARS-CoV-2 among blood donors in Rio de Janeiro, Brazil. : 10.
484. Gurgel RQ, Sá LC de, Souza DRV, Martins AF, Matos ILS, Lima AGA, et al. SARS-CoV-2 has been circulating in northeastern Brazil since February 2020: Evidence for antibody detection in asymptomatic patients. *Journal of Infection.* 2020;0. doi:10.1016/j.jinf.2020.11.037
485. Mattar S, Alvis-Guzman N, Garay E, Rivero R, García A, Botero Y, et al. Severe Acute Respiratory Syndrome Coronavirus 2 Seroprevalence Among Adults in a Tropical City of the Caribbean Area, Colombia: Are We Much Closer to Herd Immunity Than Developed Countries? *Open Forum Infectious Diseases.* 2020;7. doi:10.1093/ofid/ofaa550
486. Ariza B, Torres X, Salgado D, Cepeda M, Restrepo CG, Castellanos JC, et al. Seroprevalence and seroconversion rates to SARS-CoV-2 in interns, residents, and medical doctors in a University Hospital in Bogotá, Colombia. *Infectio.* 2021;25: 145–152. doi:10.22354/in.v25i3.938
487. Idrovo AJ, Moreno-Montoya J, Pinzón-Flórez CE. Desempeño de las pruebas combinadas de IgM e IgG rápidas en la vigilancia ocupacional de COVID-19 en empresas colombianas. *biomedica.* 2020;40: 139–147. doi:10.7705/biomedica.5829
488. Morejón Giraldoni A, Rivera Rosa ER, Díaz Mesa MÁ, Pérez Cruz Y, Morales Bolaño G, Sardiñas Méndez Y, et al. Acciones de vigilancia y control ante la notificación de casos confirmados a la COVID-19. Aguada de Pasajeros, Cienfuegos. Cuba. *MediSur.* 2020;18: 721–725. Available: [http://scielo.sld.cu/scielo.php?script=sci\\_abstract&pid=S1727-897X2020000400721&lng=es&nrm=iso&tlng=es](http://scielo.sld.cu/scielo.php?script=sci_abstract&pid=S1727-897X2020000400721&lng=es&nrm=iso&tlng=es)
489. Paulino-Ramirez R, Báez AA, Degaudenzi AV, Tapia L. Seroprevalence of Specific Antibodies against SARS-CoV-2 from Hotspot Communities in the Dominican Republic. *The American Journal of Tropical Medicine and Hygiene.* 2020;103: 2343–2346. doi:10.4269/ajtmh.20-0907
490. Brutto OHD, Costa AF, Mera RM, Recalde BY, Bustos JA, García HH. Late incidence of SARS-CoV-2 infection in a highly-endemic remote rural village. A prospective population-based cohort study. *Pathogens and Global Health.* 2020;114: 457–462. doi:10.1080/20477724.2020.1826152
491. Del Brutto OH, Costa AF, Mera RM, Recalde BY, Bustos JA, García HH. SARS-CoV-2 in Rural Latin America. A Population-based Study in Coastal Ecuador. *Clin Infect Dis.* 2020 [cited 15 Oct 2020]. doi:10.1093/cid/ciaa1055
492. Flamand C, Enfissi A, Bailly S, Sarmiento CA, Beillard E, Gaillet M, et al. Seroprevalence of anti-SARS-CoV-2 IgG at the epidemic peak in French Guiana. *medRxiv.* 2020; 2020.09.27.20202465. doi:10.1101/2020.09.27.20202465
493. Rene Mejía Núñez M, Ángel Lara J, Araujo Pleitez S, Ariel Ramírez G. Vista de Vigilancia seroepidemiológica de la circulación del SARS-CoV-2 en 41 municipios de Honduras sin reporte de casos activos, COVID-19, del 16- 23 junio 2020. | Población y Salud en Mesoamérica. *Revista Población y Salud en Mesoamérica.* 2020;18. doi:10.15517/psm.v18i2.43261
494. Cruz-Arenas E, Cabrera-Ruiz E, Laguna-Barcenas S, Colin-Castro CA, Chavez T, Franco-Cendejas R, et al. Serological prevalence of SARS-CoV-2 infection and associated factors in health care workers in a “non-COVID” hospital in Mexico City. *medRxiv.* 2020; 2020.11.30.20241331. doi:10.1101/2020.11.30.20241331

495. Martínez-Acuña N, Avalos-Nolazco D, Rodríguez-Rodríguez D, Martínez-Liu C, Taméz RC, Flores-Arechiga A, et al. Seroprevalence of anti-SARS-CoV-2 antibodies in blood donors from Nuevo Leon state, Mexico, during the beginning of the COVID-19 pandemic. medRxiv. 2020; 2020.11.28.20240325. doi:10.1101/2020.11.28.20240325
496. Remes-Troche JM, Ramos-De-la-Medina A, Manríquez-Reyes M, Martínez-Pérez Maldonado L, Solís-Gonzalez MA, Hernández Flores KG, et al. Prevalence of SARS-CoV-2 IgG antibodies in a population from Veracruz (Southeastern Mexico). medRxiv. 2020 [cited 15 May 2021]. doi:10.1101/2020.10.19.20215558
497. Cristina Díaz-Salazar, Adriana Sánchez-García, René Rodríguez-Gutiérrez, Adrián Camacho-Ortiz, Donato Saldívar-Rodríguez, José Gerardo González-González. Prevalence and associated characteristics of anti-SARS-CoV-2 antibodies in Mexico 5 months after pandemic arrival. Research Square. 2020 [cited 15 May 2021]. doi:10.21203/rs.3.rs-84890/v1
498. Villarreal A, Rangel G, Zhang X, Wong D, Britton G, Fernandez PL, et al. Performance of a point of care test for detecting IgM and IgG antibodies against SARS-CoV-2 and seroprevalence in blood donors and health care workers in Panama. medRxiv. 2020; 2020.09.25.20201459. doi:10.1101/2020.09.25.20201459
499. El 30% de testeados en el Este tuvieron Covid. ultimahora.com; [cited 22 Apr 2021]. Available: <https://www.ultimahora.com/el-30-testeados-el-este-tuvieron-covid-n2918654.html>
500. Álvarez-Antonio C, Meza-Sánchez G, Calampa C, Casanova W, Carey C, Alava F, et al. Seroprevalence of anti-SARS-CoV-2 antibodies in Iquitos, Loreto, Peru. medRxiv. 2021; 2021.01.17.21249913. doi:10.1101/2021.01.17.21249913
501. Government P. Minsa divulga ficha técnica del estudio que revela que el 25.3% de Lima y Callao adquirió el COVID-19. Gestion; 27 Jul 2020. Available: <https://gestion.pe/peru/coronavirus-peru-minsa-divulga-ficha-tecnica-del-estudio-que-revela-que-el-253-de-lima-y-callao-adquirio-el-covid-19-cuarentena-estado-de-emergencia-nndc-noticia/>
502. Angulo-Bazan Y, Solís G, Cardenas F, Jorge A, Acosta J, Cabezas C. Household transmission in people infected with SARS-CoV-2 (COVID-19) in Lima-Perú. medRxiv. 2020; 2020.09.06.20189456. doi:10.1101/2020.09.06.20189456
503. Kassem AM, Talaat H, Shawky S, Fouad R, Amer K, Elnagdy T, et al. SARS-CoV-2 infection among healthcare workers of a gastroenterological service in a tertiary care facility. Arab Journal of Gastroenterology. 2020;21: 151–155. doi:10.1016/j.ajg.2020.07.005
504. Mostafa A, Kandil S, El-Sayed MH, Girgis S, Hafez H, Yosef M, et al. Universal COVID-19 screening of 4040 health care workers in a resource-limited setting: An Egyptian pilot model in a university with 12 public hospitals and medical centers. International Journal of Epidemiology. 2020 [cited 23 Jan 2021]. doi:10.1093/ije/dyaa173
505. Poustchi H, Darvishian M, Mohammadi Z, Shayanrad A, Delavari A, Bahadorimonfared A, et al. SARS-CoV-2 antibody seroprevalence in the general population and high-risk occupational groups across 18 cities in Iran: A population-based cross-sectional study. The Lancet Infectious Diseases. 2020;0. doi:10.1016/S1473-3099(20)30858-6
506. Saberian P, Mireskandari SM, Baratloo A, Hasani-Sharamin P, Babaniamansour S, Aliniagerdroudbari E, et al. Antibody Rapid Test Results in Emergency Medical Services Personnel during COVID-19 Pandemic; a Cross Sectional study. Arch Acad Emerg Med. 2020;9. Available: <https://www.ncbi.nlm.nih.gov/pmc/articles/PMC7720855/>
507. Armin S, Karbasian F, Hoseinifatemí SM, Mansour Ghanaie R, Rafiei Tabatabaei S, Fahimzad SA, et al. Prevalence of SARS-CoV-2 Specific Antibodies in the Staff of a Children's Hospital, in Tehran, Iran. Jundishapur Journal of Microbiology; 30 Sep 2020 [cited 27 Jan 2021]. doi:10.5812/jjm.108592
508. Europe PMC. [cited 2 Feb 2021]. Available: <https://europepmc.org/article/ppr/ppr257302#fulltext-permissions->
509. Shakiba M, Nazemipour M, Salari A, Mehrabian F, Nazari SS, Rezvani SM, et al. Seroprevalence of SARS-CoV-2 in Guilan Province, Iran, April 2020. Emerging Infectious Disease journal. 2021;27. doi:10.3201/eid2702.201960

510. Shahrzad Ossareh, Seyed Morteza Bagheri, Mohsen Abbasi, Sara Abolfathi, Azam Bohlooli. Role of Screening for COVID-19 in Hemodialysis Wards, Results of a Single Center Study. *IJKD*. 2020;14: 389–98. Available: <http://www.ijkd.org/index.php/ijkd/article/view/5832/1205>
511. Alali WQ, Bastaki H, Longenecker JC, Aljunid SM, AlSeidan M, Chehadeh W, et al. Seroprevalence of SARS-CoV-2 in migrant workers in Kuwait. *Journal of Travel Medicine*. 2020 [cited 16 Feb 2021]. doi:10.1093/jtm/taaa223
512. Kammon AM, El-Arabi AA, Erhouma EA, Mehemed TM, Mohamed OA. Seroprevalence of antibodies against SARS-CoV-2 among public community and health-care workers in Alzintan City of Libya. *medRxiv*. 2020; 2020.05.25.20109470. doi:10.1101/2020.05.25.20109470
513. Elfakhri AA, Abdelghffar AF, Elhassi AF, Elmehdawi RR, Belkasem FS, Elhaddad AB, et al. Population-Based Random Survey for detection of COVID-19 Infection and Seroprevalence in Benghazi- Libya May/2020. *Journal of Preventive Medicine*. 2020;5. Available: <https://preventive-medicine.imedpub.com/abstract/populationbased-random-survey-for-detection-of-covid19-infection-and-seroprevalence-in-benghazi-libya-may2020-32698.html>
514. Jeremijenko A, Chemaitelly H, Ayoub HH, Abdulla MAH, Abou-Samra AB, Ajmi JAAAA, et al. Evidence for and level of herd immunity against SARS-CoV-2 infection: The ten-community study. *medRxiv*. 2020; 2020.09.24.20200543. doi:10.1101/2020.09.24.20200543
515. Al-Thani MH, Farag E, Bertollini R, Romaihi HEA, Abdeen S, Abdelkarim A, et al. Seroprevalence of SARS-CoV-2 infection in the craft and manual worker population of Qatar. *medRxiv*. 2020; 2020.11.24.20237719. doi:10.1101/2020.11.24.20237719
516. Nasrallah GK, Dargham SR, Shurrab F, Al-Sadeq DW, Al-Jighefee H, Chemaitelly H, et al. Are commercial antibody assays substantially underestimating SARS-CoV-2 ever infection? An analysis on a population-based sample in a high exposure setting. *medRxiv*. 2020; 2020.12.14.20248163. doi:10.1101/2020.12.14.20248163
517. Mahallawi WH, Al-Zalabani AH. The seroprevalence of SARS-CoV-2 IgG antibodies among asymptomatic blood donors in Saudi Arabia. *Saudi Journal of Biological Sciences*. 2020 [cited 17 Feb 2021]. doi:10.1016/j.sjbs.2020.12.009
518. Alharbi SA, Almutairi AZ, Jan AA, Alkhalify AM. Enzyme-Linked Immunosorbent Assay for the Detection of Severe Acute Respiratory Syndrome Coronavirus 2 (SARS-CoV-2) IgM/IgA and IgG Antibodies Among Healthcare Workers. *Cureus*. 2020 [cited 7 Feb 2021]. doi:10.7759/cureus.10285
519. Alserehi HA, Alqunaibet AM, Al-Tawfiq JA, Alharbi NK, Alshukairi AN, Alanazi KH, et al. Seroprevalence of SARS-CoV-2 (COVID-19) among healthcare workers in Saudi Arabia: Comparing case and control hospitals. *Diagnostic Microbiology and Infectious Disease*. 2020;99: 115273. doi:10.1016/j.diagmicrobio.2020.115273
520. Sozcu. Health Minister Fahrettin Koca announced the antibody test results of Turkey. *Sozcu*; 2 Jul 2020. Available: [https://www.sozcu.com.tr/2020/saglik/saglik-bakani-fahrettin-koca-turkiyenin-antikor-testi-sonuclarini-acikladi-5906832/?utm\\_source=dahafazla\\_haber&utm\\_medium=free&utm\\_campaign=dahafazlahaber](https://www.sozcu.com.tr/2020/saglik/saglik-bakani-fahrettin-koca-turkiyenin-antikor-testi-sonuclarini-acikladi-5906832/?utm_source=dahafazla_haber&utm_medium=free&utm_campaign=dahafazlahaber)
521. Alkurt G, Murt A, Aydin Z, Tatli O, Agaoglu NB, Irvem A, et al. Seroprevalence of Coronavirus Disease 2019 (COVID-19) Among Health Care Workers from Three Pandemic Hospitals of Turkey. *medRxiv*. 2020; 2020.08.19.20178095. doi:10.1101/2020.08.19.20178095
522. Khan SMS, Qurieshi MA, Haq I, Majid S, Ahmad J, Ayub T, et al. Results of a Population-Based Survey to Estimate the Seroprevalence of SARS-CoV-2 Specific IgG Antibodies in Kashmir, India, Seven Months after the Appearance of the First COVID-19 Case. Rochester, NY: Social Science Research Network; 2021 Apr. Report No.: ID 3820632. doi:10.2139/ssrn.3820632
523. Ashok Kumar. 6% rise in seropositivity among Delhi's neighbours". 3 Nov 2020. Available: <https://www.thehindu.com/news/cities/Delhi/6-rise-in-seropositivity-among-delhis-neighbours/article33006634.ece>

524. Sharma N, Sharma P, Basu S, Saxena S, Chawla R, Dushyant K, et al. The seroprevalence and trends of SARS-CoV-2 in Delhi, India: A repeated population-based seroepidemiological study. medRxiv. 2020 [cited 15 May 2021]. doi:10.1101/2020.12.13.20248123
525. Ramanath R. Survey: 50% of Bhubaneswar residents have antibodies | Bhubaneswar News - Times of India. Times of India. Available: <https://timesofindia.indiatimes.com/city/bhubaneswar/survey-50-of-bhubaneswar-residents-have-antibodies/articleshow/78966615.cms>. Accessed 7 Mar 2021.
526. Banerjee A, Gaikwad B, Desale A, Jadhav SL, Bhawalkar J, Salve P, et al. SARS-CoV-2 Seroprevalence Study in Pimpri-Chinchwad, Maharashtra, India Coinciding with Falling Trend – Do the Results Suggest Imminent Herd Immunity? 2020 [cited 14 Mar 2021]. Available: <https://papers.ssrn.com/abstract=3729394>
527. Babu GR, Sundaresan R, Athreya S, Akhtar J, Pandey PK, Maroor PS, et al. The burden of active infection and anti-SARS-CoV-2 IgG antibodies in the general population: Results from a statewide survey in Karnataka, India. medRxiv. 2020; 2020.12.04.20243949. doi:10.1101/2020.12.04.20243949
528. Goenka MK, Shah BB, Goenka U, Das SS, Afzalpurkar S, Mukherjee M, et al. COVID-19 prevalence among health-care workers of Gastroenterology department: An audit from a tertiary-care hospital in India. JGH Open. 2021;5: 56–63. doi:10.1002/jgh3.12447
529. Kshatri JS, Bhattacharya D, Kanungo S, Giri S, Palo SK, Parai D, et al. Findings from serological surveys (in August 2020) to assess the exposure of adult population to SARS Cov-2 infection in three cities of Odisha, India. 2020 [cited 15 May 2021]. doi:10.1101/2020.10.11.20210807
530. Sep 17 AS/T/, 2020, Ist 09:01. 11.9% seroprevalence in Ujjain, finds survey | Bhopal News - Times of India. The Times of India; [cited 22 Apr 2021]. Available: <https://timesofindia.indiatimes.com/city/bhopal/11-9-seroprevalence-in-ujjain-finds-survey/articleshow/78159395.cms>
531. Mohanan M, Malani A, Krishnan K, Acharya A. Prevalence of SARS-CoV-2 in Karnataka, India. JAMA. 2021 [cited 19 Feb 2021]. doi:10.1001/jama.2021.0332
532. Goenka M, Afzalpurkar S, Goenka U, Das SS, Mukherjee M, Jajodia S, et al. Seroprevalence of COVID-19 Amongst Health Care Workers in a Tertiary Care Hospital of a Metropolitan City from India. J Assoc Physicians India. 2020;68: 14–19.
533. Dixit JV, Iravane J, Andurkar SP, Gandal U, Padalkar N, Sayyed M, et al. SEROPREVALENCE OF COVID-19 IN AURANGABAD DISTRICT. IJCRT. 2020;8: 3675–3683. Available: <https://ijcrt.org/papers/IJCRT2009467.pdf>
534. Siddiqui S, Naushin S, Pradhan S, Misra A, Tyagi A, Loomba M, et al. SARS-CoV-2 antibody seroprevalence and stability in a tertiary care hospital-setting. medRxiv. 2020 [cited 14 May 2021]. doi:10.1101/2020.09.02.20186486
535. Ray A, Singh K, Chattopadhyay S, Mehdi F, Batra G, Gupta A, et al. Seroprevalence of anti-SARS-CoV-2 IgG antibodies in hospitalized patients at a tertiary referral center in North India. medRxiv. 2020; 2020.08.22.20179937. doi:10.1101/2020.08.22.20179937
536. Satpati P, Sarangi S, Gantait K, Endow S, Mandal N, Panchanan K, et al. Sero-surveillance (IgG) of SARS-CoV-2 among Asymptomatic General population of Paschim Medinipur, West Bengal, India. Infectious Diseases (except HIV/AIDS); 2020 Sep. doi:10.1101/2020.09.12.20193219
537. Aneesha Bedi. 28.3% of Delhi's population now exposed to Covid, shows second sero survey, up from 23.4%. The Print. 19 Aug 2020. Available: <https://theprint.in/health/28-3-of-delhis-population-now-exposed-to-covid-shows-second-sero-survey-up-from-23-4/484455/>
538. Smarajit Dey. Serial SARS-CoV-2 Seropravelence Studies in Delhi July-August 2020: Indications of Pre-existing Cross-reactive Antibodies and Implications for Disease Progression. Research Square. 2021. doi:10.21203/rs.3.rs-80259/v1

539. Ghose A, Bhattacharya S, Karthikeyan AS, Kudale A, Monteiro JM, Joshi A, et al. Community prevalence of antibodies to SARS-CoV-2 and correlates of protective immunity in an Indian metropolitan city. medRxiv. 2020; 2020.11.17.20228155. doi:10.1101/2020.11.17.20228155
540. Kumar A, Sathyapalan D, Ramachandran A, Subhash K, Biswas L, Beena KV. SARS-CoV-2 antibodies in healthcare workers in a large university hospital, Kerala, India. *Clinical Microbiology and Infection*. 2021;27: 481–483. doi:10.1016/j.cmi.2020.09.013
541. Malani A, Shah D, Kang G, Lobo GN, Shastri J, Mohanan M, et al. Seroprevalence of SARS-CoV-2 in slums versus non-slums in Mumbai, India. *The Lancet Global Health*. 2021;9: e110–e111. doi:10.1016/S2214-109X(20)30467-8
542. Yusra Husain. 4% 'healthy' blood donors in Lucknow found with Covid antibodies. *The Times of India*. 19 Jul 2020. Available: <https://timesofindia.indiatimes.com/city/lucknow/4-healthy-blood-donors-in-city-found-with-covid-antibodies/articleshow/77044828.cms>
543. Desk India com N. COVID-19: People From Bhiwandi, Anand Vihar Have Antibodies Against Corona? Check Report. *Indiacom*. 23 Jul 2020. Available: <https://www.india.com/news/india/covid-19-people-from-bhiwandi-anand-vihar-have-antibodies-against-corona-check-report-4092355/>
544. Khan SMS, Qurieshi MA, Haq I, Majid S, Bhat AA, Nabi S, et al. Seroprevalence of SARS-CoV-2 specific IgG antibodies in District Srinagar, northern India – A cross-sectional study. *PLOS ONE*. 2020;15: e0239303. doi:10.1371/journal.pone.0239303
545. Archana Mishra. Sero survey: 1,544 tested, 180 found with Covid-19 antibodies in Haryana. *Hindustan Times*. 21 Jul 2020. Available: <https://www.hindustantimes.com/gurugram/sero-survey-1-544-tested-180-found-with-covid-19-antibodies-in-haryana/story-k7DUZ8WH4jYqAzCsUmXkEJ.html>
546. Ahmedabad has no herd immunity, only 17.6% have antibodies. *The Times of India*. 24 Jul 2020. Available: <https://timesofindia.indiatimes.com/city/ahmedabad/ahmedabad-has-no-herd-immunity-only-17-6-have-antibodies/articleshow/77137851.cms>. Accessed 13 Mar 2021.
547. Astha Saxena. New plan to check Covid spread in Delhi: Sero survey every month. *The Indian Express*. 23 Jul 2020. Available: <https://indianexpress.com/article/cities/delhi/delhi-coronavirus-latest-updates-sero-surveys-6518032/>
548. Prakash O, Solanki B, Sheth JK, Joshi B, Kadam M, Vyas S, et al. Assessing seropositivity for IgG antibodies against SARS-CoV-2 in Ahmedabad city of India: A cross-sectional study. *BMJ Open*. 2021;11: e044101. doi:10.1136/bmjopen-2020-044101
549. Kumar N, Bhartiya S, Singh T. Duration of anti-SARS-CoV-2 antibodies much shorter in India. *Vaccine*. 2021;39: 886–888. doi:10.1016/j.vaccine.2020.10.094
550. Singhal T, Shah S, Naik R, Kazi A, Thakkar P. Prevalence of COVID-19 Antibodies in Healthcare Workers at the Peak of the Pandemic in Mumbai, India: A Preliminary Study. *Indian Journal of Medical Microbiology*. 2020;38: 461–463. doi:10.4103/ijmm.IJMM\_20\_308
551. Khan MS, Haq I, Qurieshi MA, Majid S, Bhat AA, Obaid M, et al. SARS-CoV-2 seroprevalence in healthcare workers of dedicated-COVID hospitals and non-COVID hospitals of District Srinagar, Kashmir. medRxiv. 2020; 2020.10.23.20218164. doi:10.1101/2020.10.23.20218164
552. Aswin Kumar. Initial trend: Positivity rate low in antibody testing. *The Times of India*. 14 Jun 2020. Available: <https://timesofindia.indiatimes.com/city/thiruvananthapuram/initial-trend-positivity-rate-low-in-antibody-testing/articleshow/76363847.cms>
553. Rao S. Covid-19: Jayadeva says its survey hints at herd immunity. *The Times of India*. 6 Jun 2020. Available: <https://timesofindia.indiatimes.com/city/bengaluru/covid-19-jayadeva-says-its-survey-hints-at-herd-immunity/articleshow/76228490.cms>. Accessed 13 Mar 2021.

554. Murhekar MV, Bhatnagar T, Selvaraju S, Rade K, Saravanakumar V, Thangaraj JWV, et al. Prevalence of SARS-CoV-2 infection in India: Findings from the national serosurvey, May-June 2020. *Indian Journal of Medical Research*. 2020;152: 48. doi:10.4103/ijmr.IJMR\_3290\_20
555. Swatee Kher. Six Maharashtra districts have higher Covid-19 prevalence than nation's finding. *The Times of India*. 22 Jun 2020. Available: <https://timesofindia.indiatimes.com/city/pune/6-maha-districts-have-higher-ncov-prevalence-than-nations-finding/articleshow/76500273.cms>
556. Nisar MI, Ansari N, Amin M, Hotwani A, Khalid F, Rehman N, et al. Serial population-based sero-surveys for COVID-19 in low and high transmission neighborhoods of urban Pakistan. 2020 [cited 15 May 2021]. doi:10.1101/2020.07.28.20163451
557. Zaidi S, Rizwan F, Riaz Q, Siddiqui A, Khawaja S, Imam M, et al. Seroprevalence of anti-SARS-CoV-2 antibodies in residents of Karachi—challenges in acquiring herd immunity for COVID 19. *Journal of Public Health*. 2020 [cited 2 Jun 2021]. doi:10.1093/pubmed/fdaa170
558. Younas A, Waheed S, Khawaja S, Imam M, Borhany M, Shamsi T. Seroprevalence of SARS-CoV-2 antibodies among healthy blood donors in Karachi, Pakistan. *Transfusion and Apheresis Science*. 2020; 102923. doi:10.1016/j.transci.2020.102923
559. Noor M, Haq M, Ul Haq N, Amin S, Rahim F, Bahadur S, et al. Does Working in a COVID-19 Receiving Health Facility Influence Seroprevalence to SARS-CoV-2? *Cureus*. 2020 [cited 4 Mar 2021]. doi:10.7759/cureus.11389
560. Haq M, Rehman A, Noor M, Ahmed J, Ahmad J, Irfan M, et al. Seroprevalence and Risk Factors of SARS CoV-2 in Health Care Workers of Tertiary-Care Hospitals in the Province of Khyber Pakhtunkhwa, Pakistan. *medRxiv*. 2020; 2020.09.29.20203125. doi:10.1101/2020.09.29.20203125
561. Chughtai O, Batool H, Khan M, Chughtai A. Frequency of COVID-19 IgG Antibodies among Special Police Squad Lahore, Pakistan. *J Coll Physicians Surg Pak*. 2020;30: 735–739. doi:10.29271/jcpsp.2020.07.735
562. Li S, Qiu Y, Tang L, Wang Z, Cao W, Sun X. Seroprevalence of antibodies to SARS-CoV-2 is particularly high in patient population with ocular surface diseases. *medRxiv*. 2020; 2020.09.22.20198465. doi:10.1101/2020.09.22.20198465
563. Wang R, Jin F, Cao S, Yuan H, Qu J, Zhang J, et al. Seroprevalence of SARS-CoV-2 infections among children visiting a hospital. *Pediatric Investigation*. 2020;4: 236–241. doi:10.1002/ped4.12231
564. He L, Zeng Y, Zeng C, Zhou Y, Li Y, Xie X, et al. Positive Rate of Serology and RT-PCR for COVID-19 among healthcare workers during different periods in Wuhan, China. *Journal of Infection*. 2020 [cited 15 Nov 2020]. doi:10.1016/j.jinf.2020.08.027
565. He L, Zeng Y, Zeng C, Zhou Y, Li Y, Xie X, et al. Positive Rate of Serology and RT-PCR for COVID-19 between Community Residents and Healthcare Workers in Wuhan, China. *Japanese Journal of Infectious Diseases*. 2020;advpub. doi:10.7883/yoken.JJID.2020.691
566. Liu A, Li Y, Wan Z, Wang W, Lei X, Lv Y. Seropositive Prevalence of Antibodies Against SARS-CoV-2 in Wuhan, China. *JAMA Netw Open*. 2020;3: e2025717. doi:10.1001/jamanetworkopen.2020.25717
567. Pan Y, Li X, Yang G, Fan J, Tang Y, Hong X, et al. Seroprevalence of SARS-CoV-2 immunoglobulin antibodies in Wuhan, China: Part of the city-wide massive testing campaign. *Clinical Microbiology and Infection*. 2020;27: 253–257. doi:10.1016/j.cmi.2020.09.044
568. Tong X, Ning M, Huang R, Jia B, Yan X, Xiong Y, et al. Surveillance of SARS-CoV-2 infection among frontline health care workers in Wuhan during COVID-19 outbreak. *Immun Inflamm Dis*. 2020;8: 840–843. doi:10.1002/iid3.340
569. Liang W, Lin Y, Bi J, Li J, Liang Y, Wong S-S, et al. Serosurvey of SARS-CoV-2 among hospital visitors in China. *Cell Research*. 2020;30: 817–818. doi:10.1038/s41422-020-0371-0

570. Le Chang, Wangheng Hou, Lei Zhao, Yali Zhang, Yanbin Wang, Linfeng Wu, et al. The prevalence of antibodies to SARS-CoV-2 among blood donors in China. *medRxiv*. 2020; 32. doi:10.1101/2020.07.13.20153106
571. Liu T, Wu S, Tao H, Zeng G, Zhou F, Wang X. Prevalence of IgG Antibodies to SARS-CoV-2 in Wuhan – Implications for the Longevity of Antibodies Against SARS-CoV-2. *Research Square*. 2020 [cited 15 May 2021]. doi:10.21203/rs.3.rs-99748/v1
572. Lei Q, Li Y, Hou H, Wang F, Ouyang Z, Zhang Y, et al. Antibody dynamics to SARS-CoV-2 in asymptomatic COVID-19 infections. *Allergy*. 2020;76: 551–561. doi:10.1111/all.14622
573. Ling R, Yu Y, He J, Zhang J, Xu S, Sun R, et al. Seroprevalence and epidemiological characteristics of immunoglobulin M and G antibodies against SARS-CoV-2 in asymptomatic people in Wuhan, China. *medRxiv*. 2020; 28. doi:10.1101/2020.06.16.20132423
574. Wang S, Tao F, Hou Y, Zhang A, Xiong H, Sun J, et al. Screening of SARS-CoV-2 in 299 Hospitalized Children with Hemato-oncological Diseases: A Multicenter Survey in Hubei, China. *Current Medical Science*. 2020;40: 642–645. doi:10.1007/s11596-020-2228-7
575. Liu M, Cheng S-Z, Xu K-W, Yang Y, Zhu Q-T, Zhang H, et al. Use of personal protective equipment against coronavirus disease 2019 by healthcare professionals in Wuhan, China: Cross sectional study. *BMJ*. 2020;369. doi:10.1136/bmj.m2195
576. Wang X, Gao W, Cui S, Zhang Y, Zheng K, Ke J, et al. A population-based seroprevalence survey of severe acute respiratory syndrome coronavirus 2 infection in Beijing, China. *medRxiv*. 2020 [cited 14 May 2021]. doi:10.1101/2020.09.23.20197756
577. Wu X, Fu B, Chen L, Feng Y. Serological tests facilitate identification of asymptomatic SARS-CoV-2 infection in Wuhan, China. *Journal of Medical Virology*. 2020;92: 1795–1796. doi:10.1002/jmv.25904
578. Xu X, Sun J, Nie S, Li H, Kong Y, Liang M, et al. Seroprevalence of immunoglobulin M and G antibodies against SARS-CoV-2 in China. *Nature Medicine*. 2020;26: 1193–1195. doi:10.1038/s41591-020-0949-6
579. Xu R, Huang J, Duan C, Liao Q, Shan Z, Wang M, et al. Low prevalence of antibodies against SARS-CoV-2 among voluntary blood donors in Guangzhou, China. *Journal of Medical Virology*. n/a. doi:10.1002/jmv.26445
580. Zhang A, Hu Q, Liu A, Wang S, Jin S, Wang Y, et al. Prevention of COVID-19 infection in a pediatric oncology ward in Wuhan. *Pediatric Blood & Cancer*. 2020;67: e28424. doi:10.1002/pbc.28424
581. Zhou F, Li J, Lu M, Ma L, Pan Y, Liu X, et al. Tracing asymptomatic SARS-CoV-2 carriers among 3674 hospital staff: a cross-sectional survey. *EClinicalMedicine*. 2020;26. doi:10.1016/j.eclinm.2020.100510
582. Li Y, He Q, Yu R, Jiang H, Wang W, Feng D, et al. Highlighted Prospects of an IgM/IgG Antibodies Test in Identifying Individuals With Asymptomatic Severe Acute Respiratory Syndrome Coronavirus 2 (SARS-CoV-2) Infection. *Archives of Pathology & Laboratory Medicine*. 2021;145: 39–45. doi:10.5858/arpa.2020-0310-SA
583. Tang H, Tian J-B, Dong J-W, Tang X-T, Yan Z-Y, Zhao Y-Y, et al. Serologic Detection of SARS-CoV-2 Infections in Hemodialysis Centers: A Multicenter Retrospective Study in Wuhan, China. *American Journal of Kidney Diseases*. 2020;76: 490–499.e1. doi:10.1053/j.ajkd.2020.06.008
584. Tu D, Shu J, Wu X, Li H, Xia Z, Zhang Y, et al. Immunological detection of serum antibodies in pediatric medical workers exposed to varying levels of SARS-CoV-2. *J Infect*. 2021;82: 159–198. doi:10.1016/j.jinf.2020.07.023
585. Zhang C, Lin L, Tang D, Liu F, Li M, Li Q, et al. Antibody responses to SARS-CoV-2 in healthy individuals returning to Shenzhen. *Journal of Medical Virology*. 2020;n/a. doi:10.1002/jmv.26355
586. Xiong S, Guo C, Dittmer U, Zheng X, Wang B. The prevalence of antibodies to SARS-CoV-2 in asymptomatic healthcare workers with intensive exposure to COVID-19. *medRxiv*. 2020; 2020.05.28.20110767. doi:10.1101/2020.05.28.20110767

587. To KK-W, Cheng VC-C, Cai J-P, Chan K-H, Chen L-L, Wong L-H, et al. Seroprevalence of SARS-CoV-2 in Hong Kong and in residents evacuated from Hubei province, China: A multicohort study. *The Lancet Microbe*. 2020;1: e111–e118. doi:10.1016/S2666-5247(20)30053-7
588. Zhao D, Wang M, Wang M, Zhao Y, Zheng Z, Li X, et al. Asymptomatic infection by SARS-CoV-2 in healthcare workers: A study in a large teaching hospital in Wuhan, China. *International Journal of Infectious Diseases*. 2020;99: 219–225. doi:10.1016/j.ijid.2020.07.082
589. Chen Y, Tong X, Wang J, Huang W, Yin S, Huang R, et al. High SARS-CoV-2 antibody prevalence among healthcare workers exposed to COVID-19 patients. *J Infect*. 2020;81: 420–426. doi:10.1016/j.jinf.2020.05.067
590. Zhang J, Zhang X, Liu J, Ban Y, Li N, Wu Y, et al. Serological detection of 2019-nCoV respond to the epidemic: A useful complement to nucleic acid testing. *International Immunopharmacology*. 2020;88: 106861. doi:10.1016/j.intimp.2020.106861
591. Hallowell BD, Carlson CM, Jacobs JR, Pomeroy M, Steinberg J, Tenforde MW, et al. Severe Acute Respiratory Syndrome Coronavirus 2 Prevalence, Seroprevalence, and Exposure among Evacuees from Wuhan, China, 2020 - Volume 26, Number 9—September 2020 - *Emerging Infectious Diseases journal - CDC*. EID. 2020;29. doi:10.3201/eid2609.201590
592. Sam I-C, Chong YM, Tan CW, Chan YF. Low postpandemic wave SARS-CoV-2 seroprevalence in Kuala Lumpur and Selangor, Malaysia. *Journal of Medical Virology*. n/a. doi:10.1002/jmv.26426
593. Nopsopon T, Pongpirul K, Chotirosniramit K, Hiransuthikul N. COVID-19 Antibody in Thai Community Hospitals. *medRxiv*. 2020; 2020.06.24.20139188. doi:10.1101/2020.06.24.20139188
594. Nopsopon T, Pongpirul K, Chotirosniramit K, Jakaew W, Kaewwijit C, Kanchana S, et al. Seroprevalence of Hospital Staff in Province with Zero COVID-19 Cases. *medRxiv*. 2020; 2020.07.13.20151944. doi:10.1101/2020.07.13.20151944
595. Chau NVV, Toan LM, Man DNH, Thao HP, Lan NPH, Ty DTB, et al. Absence of SARS-CoV-2 antibodies in health care workers of a tertiary referral hospital for COVID-19 in southern Vietnam. *Journal of Infection*. 2020;82: e36–e37. doi:10.1016/j.jinf.2020.11.018
596. Batchi-Bouyou AL, Lobaloba Ingoba L, Ndounga M, Vouvougui JC, Mfoutou Mapanguy CC, Boumpoutou KR, et al. High SARS-CoV-2 IgG/IGM seroprevalence in asymptomatic Congolese in Brazzaville, the Republic of Congo. *International Journal of Infectious Diseases*. 2020;106: 3–7. doi:10.1016/j.ijid.2020.12.065
597. Kempen JH, Abashawl A, Suga HK, Nigussie Difabachew M, Kempen CJ, Tesfaye Debele M, et al. SARS-CoV-2 Serosurvey in Addis Ababa, Ethiopia. *The American Journal of Tropical Medicine and Hygiene*. 2020;103: 2022–2023. doi:10.4269/ajtmh.20-0816
598. Alemu BN, Addissie A, Mamo G, Deyessa N, Abebe T, Abagero A, et al. Sero-prevalence of anti-SARS-CoV-2 Antibodies in Addis Ababa, Ethiopia. *Microbiology*; 2020 Oct. doi:10.1101/2020.10.13.337287
599. Adetifa IMO, Uyoga S, Gitonga JN, Mugo D, Otiende M, Nyagwange J, et al. Temporal trends of SARS-CoV-2 seroprevalence in transfusion blood donors during the first wave of the COVID-19 epidemic in Kenya. *medRxiv*. 2021; 2021.02.09.21251404. doi:10.1101/2021.02.09.21251404
600. Chibwana MG, Jere KC, kamng'ona R, Mandolo J, Katunga-Phiri V, Tembo D, et al. High SARS-CoV-2 seroprevalence in Health Care Workers but relatively low numbers of deaths in urban Malawi. *medRxiv*. 2020; 2020.07.30.20164970. doi:10.1101/2020.07.30.20164970
601. Majiya H, Aliyu-Paiko M, Balogu VT, Musa DA, Salihu IM, Kawu AA, et al. Seroprevalence of COVID-19 in Niger State. *medRxiv*. 2020 [cited 12 Nov 2020]. doi:10.1101/2020.08.04.20168112
602. Asuquo MI, Effa E, Otu A, Ita O, Udoh U, Umoh V, et al. Prevalence of IgG and IgM antibodies to SARS-CoV-2 among clinic staff and patients. *medRxiv*. 2020; 2020.07.02.20145441. doi:10.1101/2020.07.02.20145441



603. Shaw JA, Meiring M, Cummins T, Chegou NN, Claassen C, Du Plessis N, et al. Higher SARS-CoV-2 seroprevalence in workers with lower socioeconomic status in Cape Town, South Africa. Musuka G, editor. PLoS ONE. 2021;16: e0247852. doi:10.1371/journal.pone.0247852
604. Hsiao M, Davies M-A, Kalk E, Hardie D, Naidoo M, Center C, et al. SARS-CoV-2 seroprevalence in the Cape Town Metropolitan sub-districts after the peak of infections. NICD COVID-19 Special Public Health Surveillance Bulletin. 2020;18: 9. Available: [https://www.nicd.ac.za/wp-content/uploads/2020/09/COVID-19-Special-Public-Health-Surveillance-Bulletin\\_Issue-5.pdf](https://www.nicd.ac.za/wp-content/uploads/2020/09/COVID-19-Special-Public-Health-Surveillance-Bulletin_Issue-5.pdf)
605. Halatoko WA, KONU YR, Gbeasor-Komlanvi FA, Sadio AJ, Tchankoni MK, Komlanvi KS, et al. Prevalence of SARS-CoV-2 among high-risk populations in Lomé (Togo) in 2020. medRxiv. 2020; 2020.08.07.20163840. doi:10.1101/2020.08.07.20163840
